# Supplementary material for: Plastid-localized amino acid biosynthetic pathways of Plantae are predominantly composed of non-cyanobacterial enzymes
Source: PubMed Central journal article supplement — Sci Rep. 2012 Dec 11;2:955. doi: 10.1038/srep00955 (PMC3518814; doi:10.1038/srep00955), 2012-12-11
Supplement: srep00955-s1.pdf [file srep00955-s1.pdf]

## **Supplementary information**

### **Plastid-localized amino acid biosynthetic pathways of Plantae are predominantly composed of non-cyanobacterial enzymes**

Adrian Reyes-Prieto and Ahmed Moustafa

#### **Contents**

|                               | <b>page</b> |
|-------------------------------|-------------|
| Supplementary Figures S1-S156 | 2           |
| Supplementary Tables S1-S2    | 159         |

## Figures caption

**Supplemental figures S1 to S156.** Maximum likelihood phylogenetic trees of the *Arabidopsis thaliana* enzymes involved in amino acid biosynthesis. Page numbers correspond to detailed descriptions in the main text and information presented in Table S1 (Supplementary Information). The numbers near (right side) nodes indicate RaxML bootstrap support values. Branch lengths are proportional to the number of substitutions per site (see the scale bars)

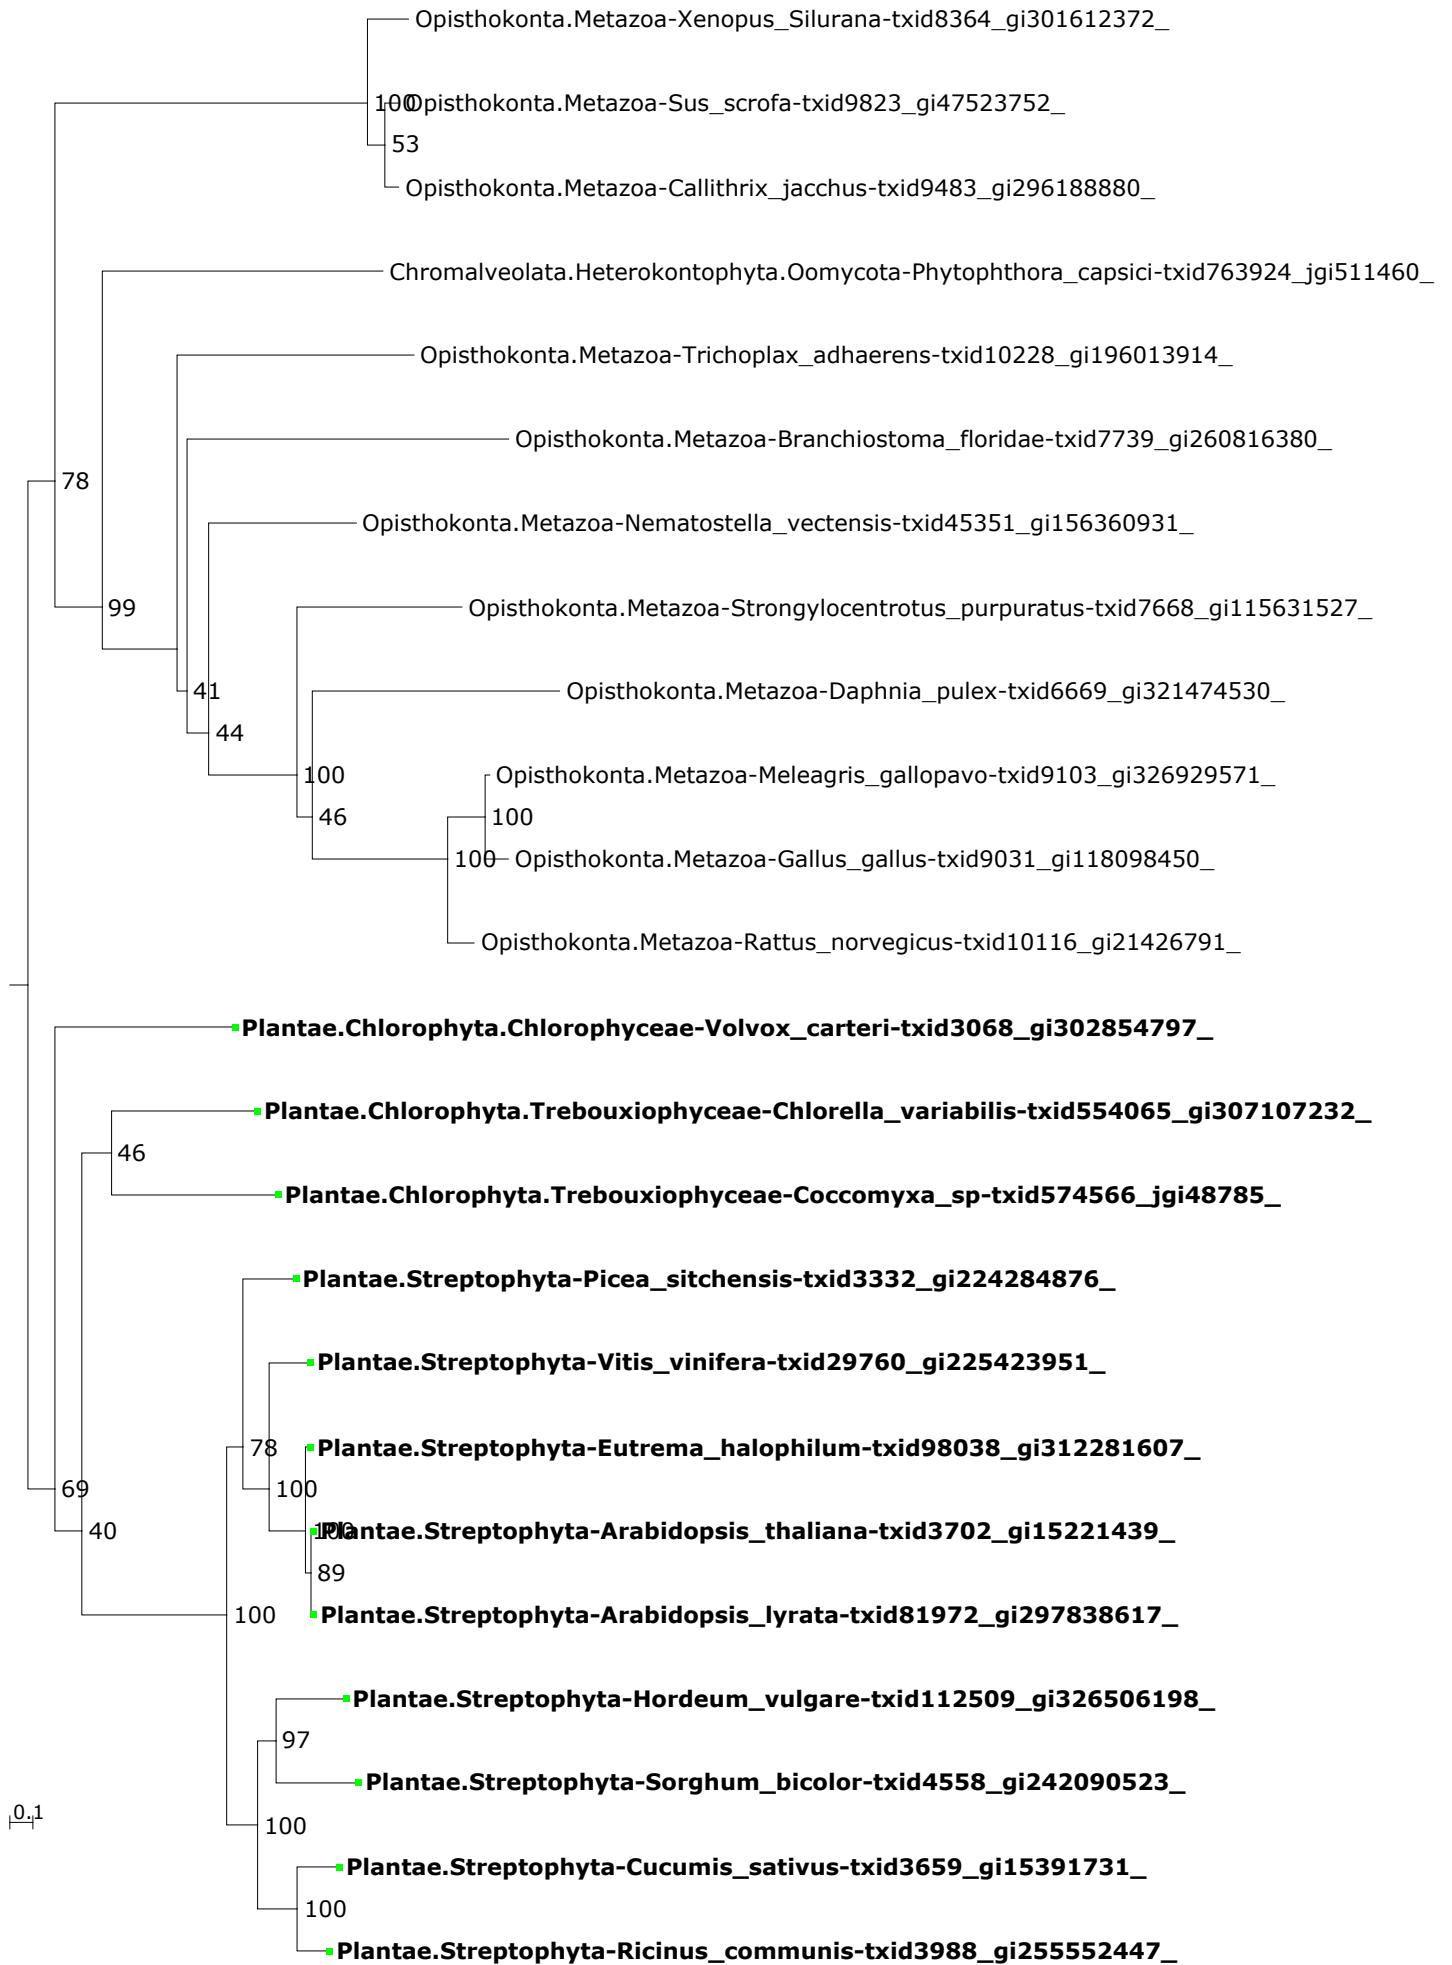

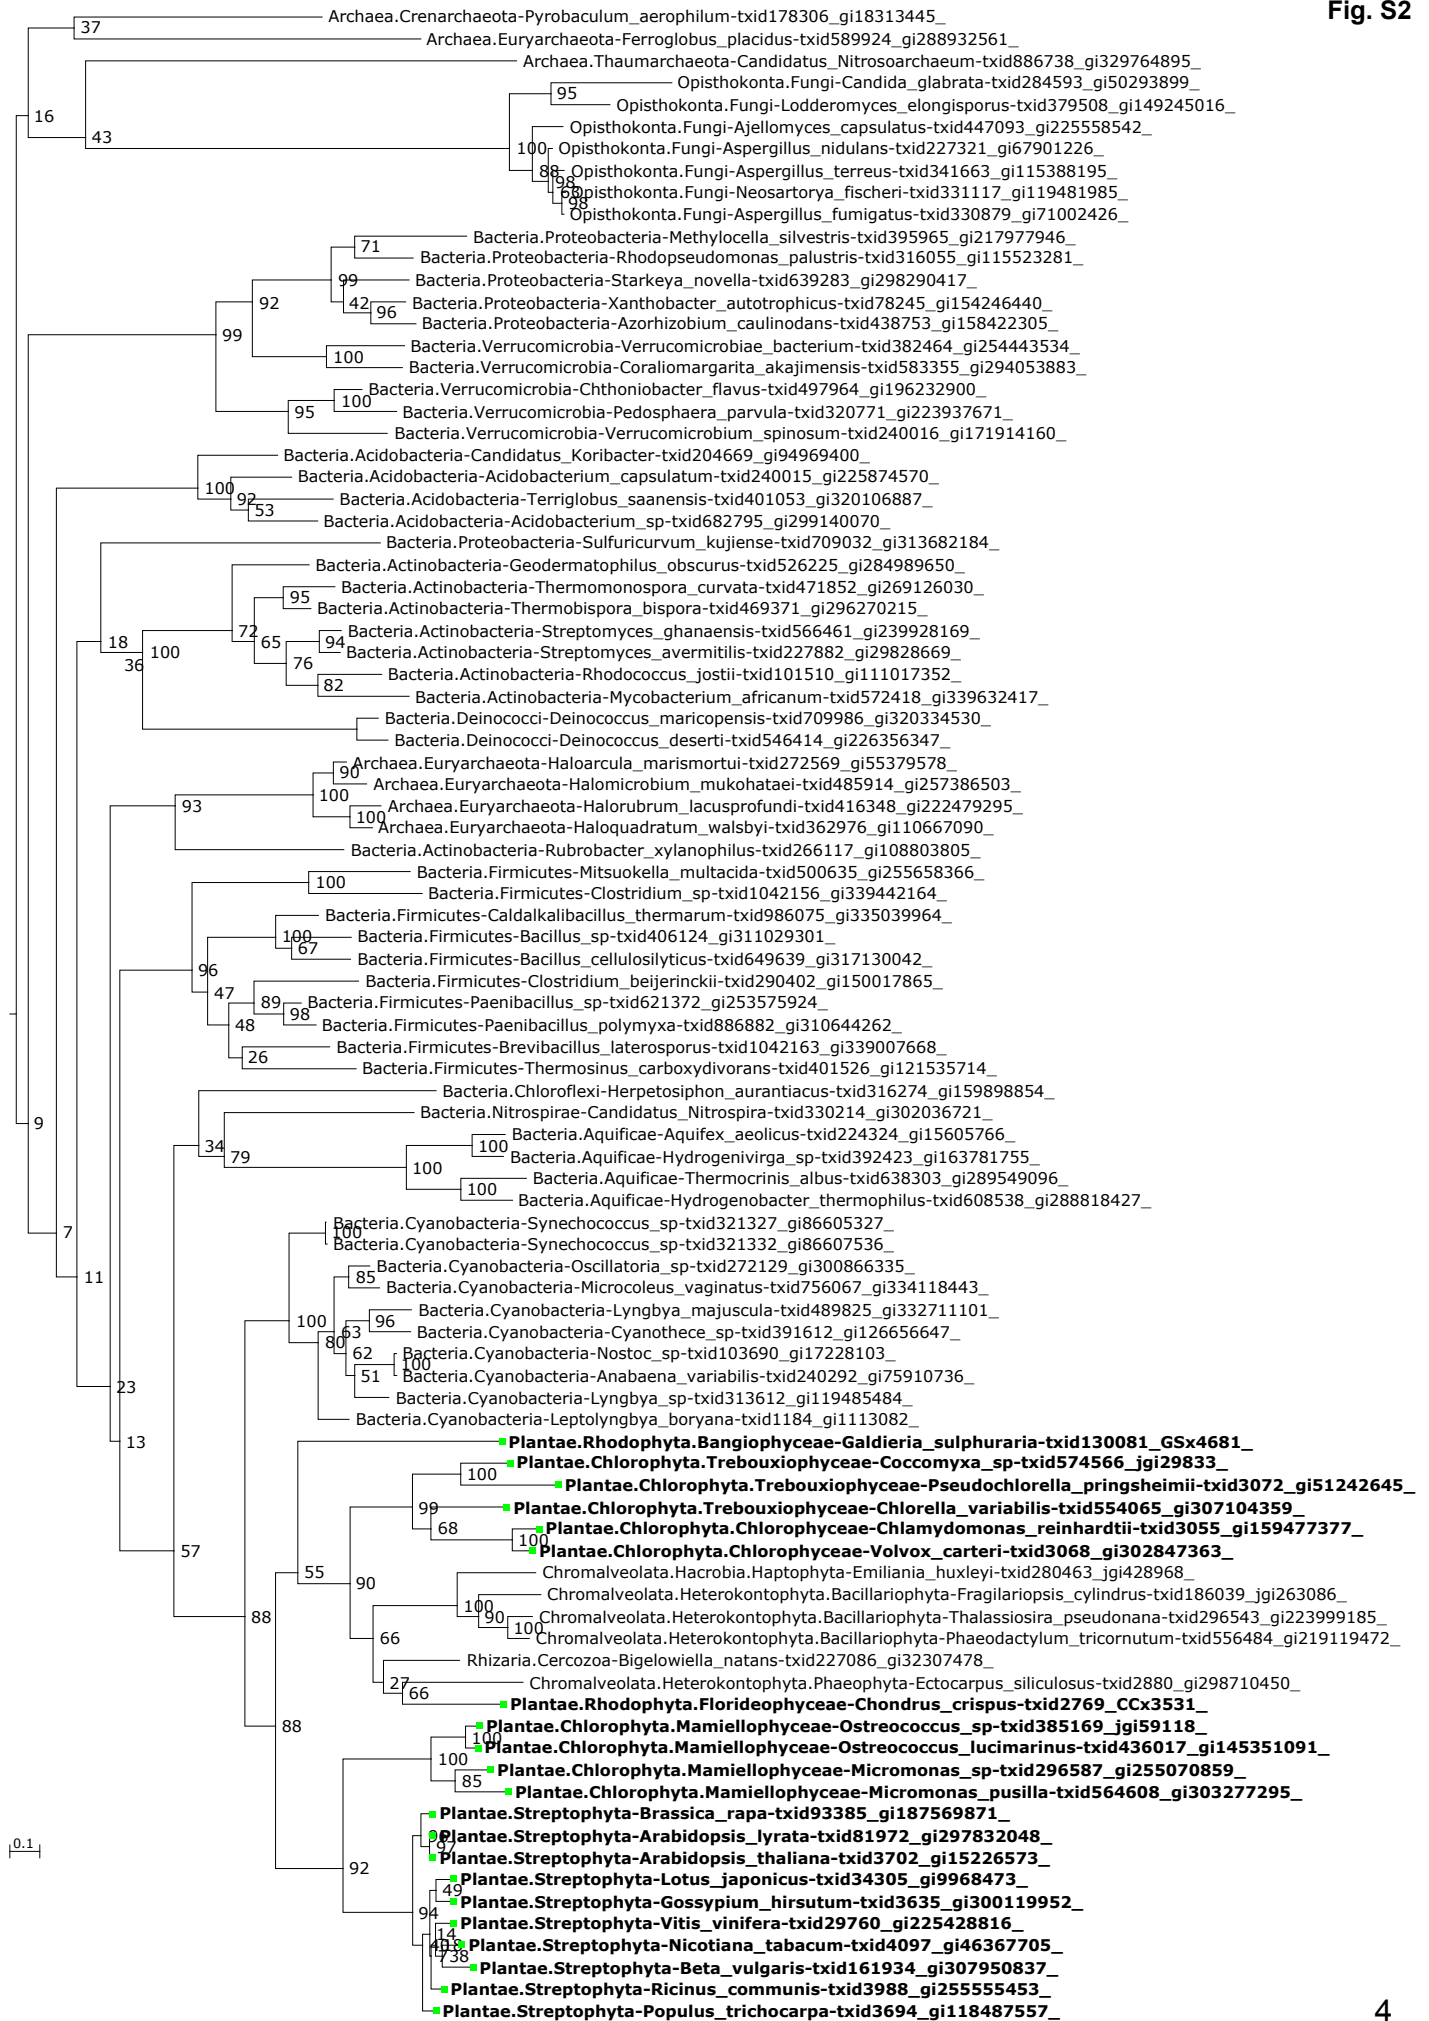

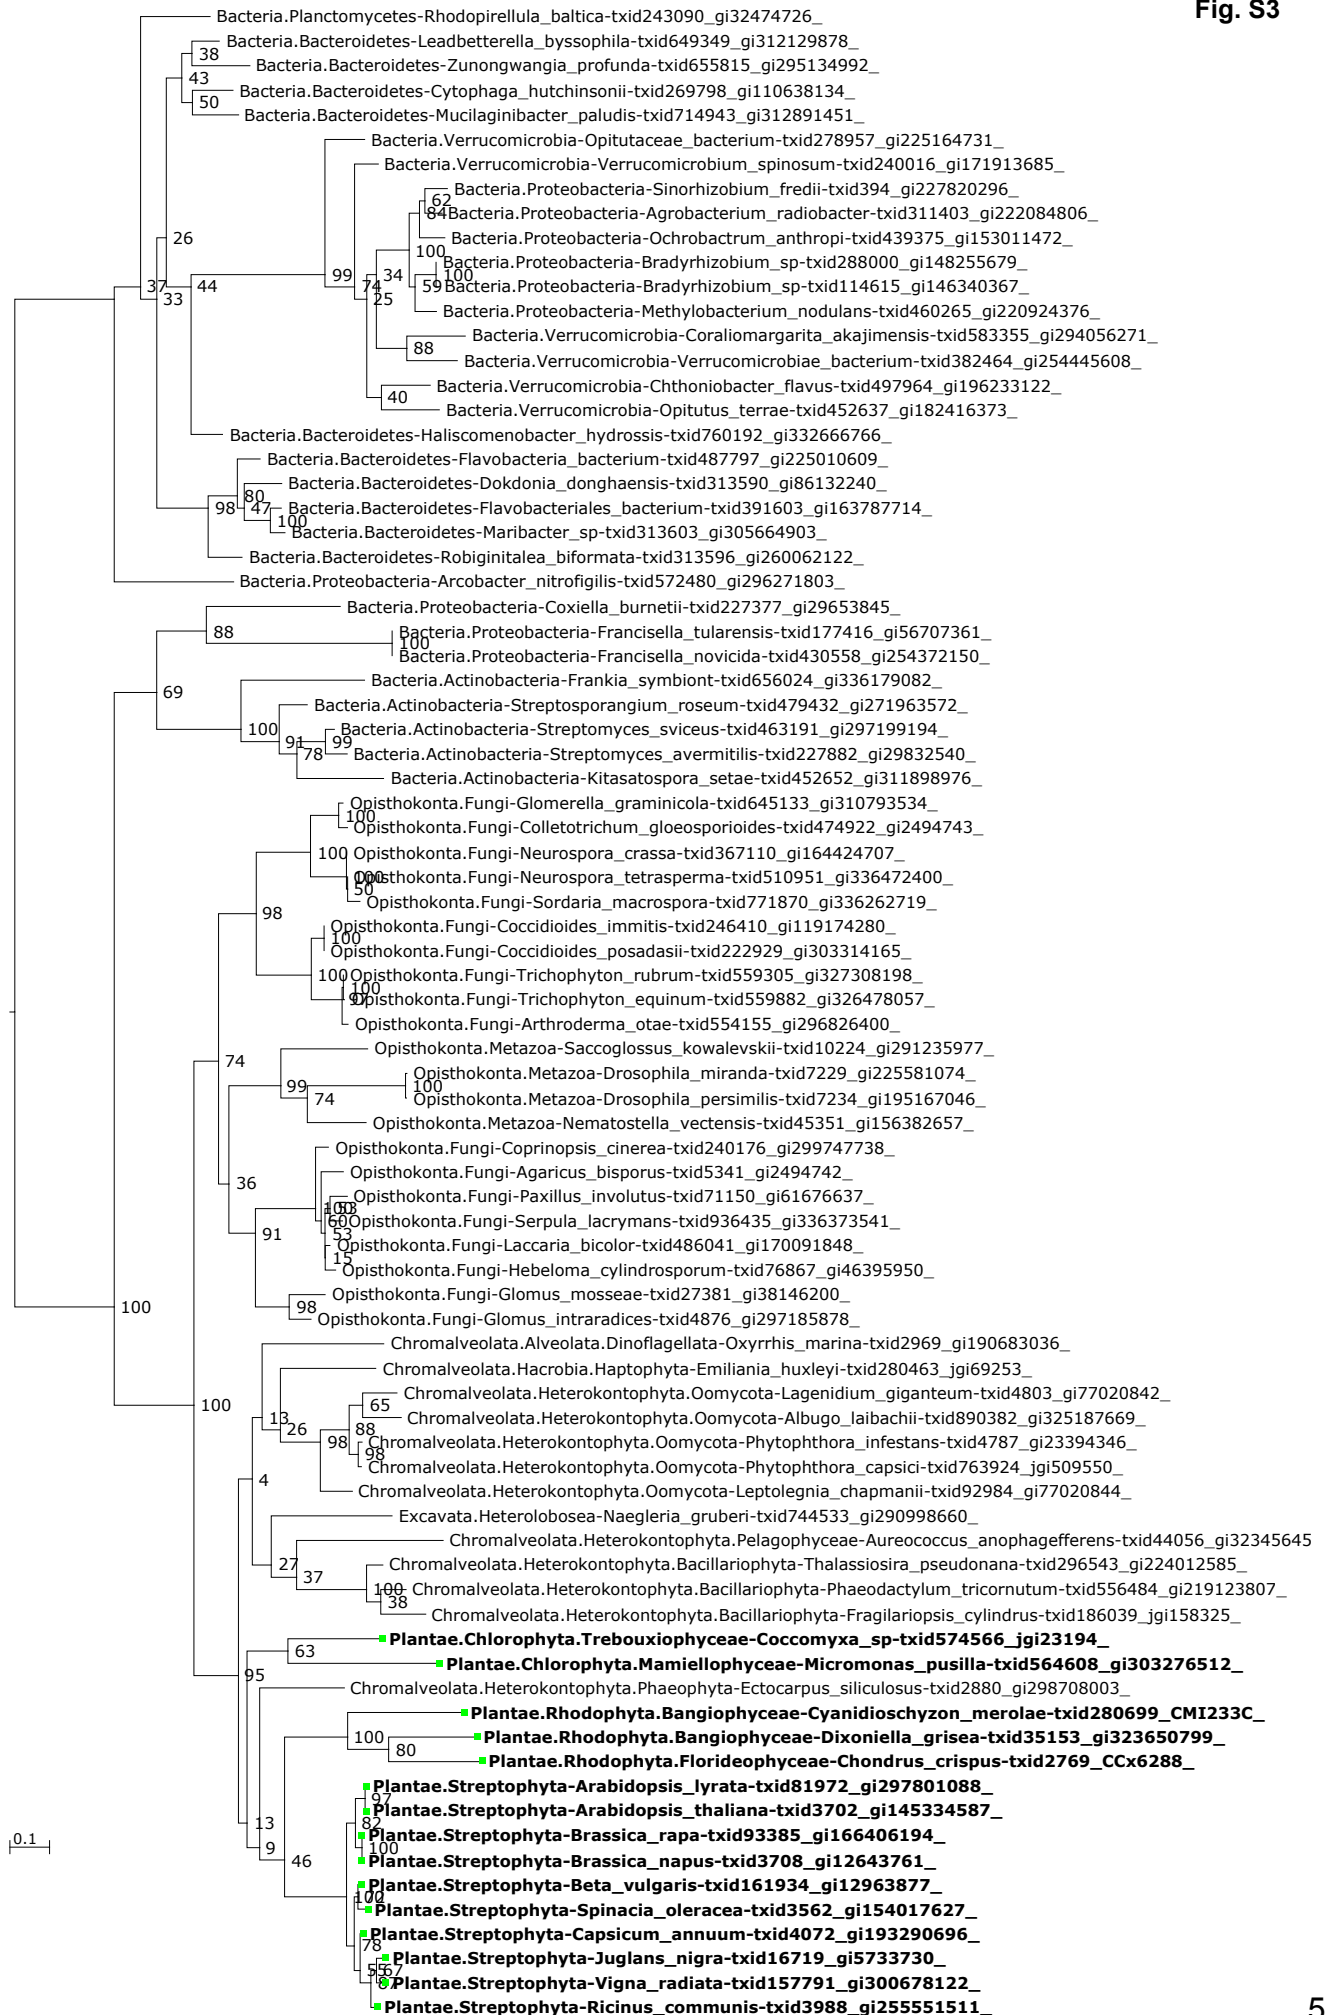

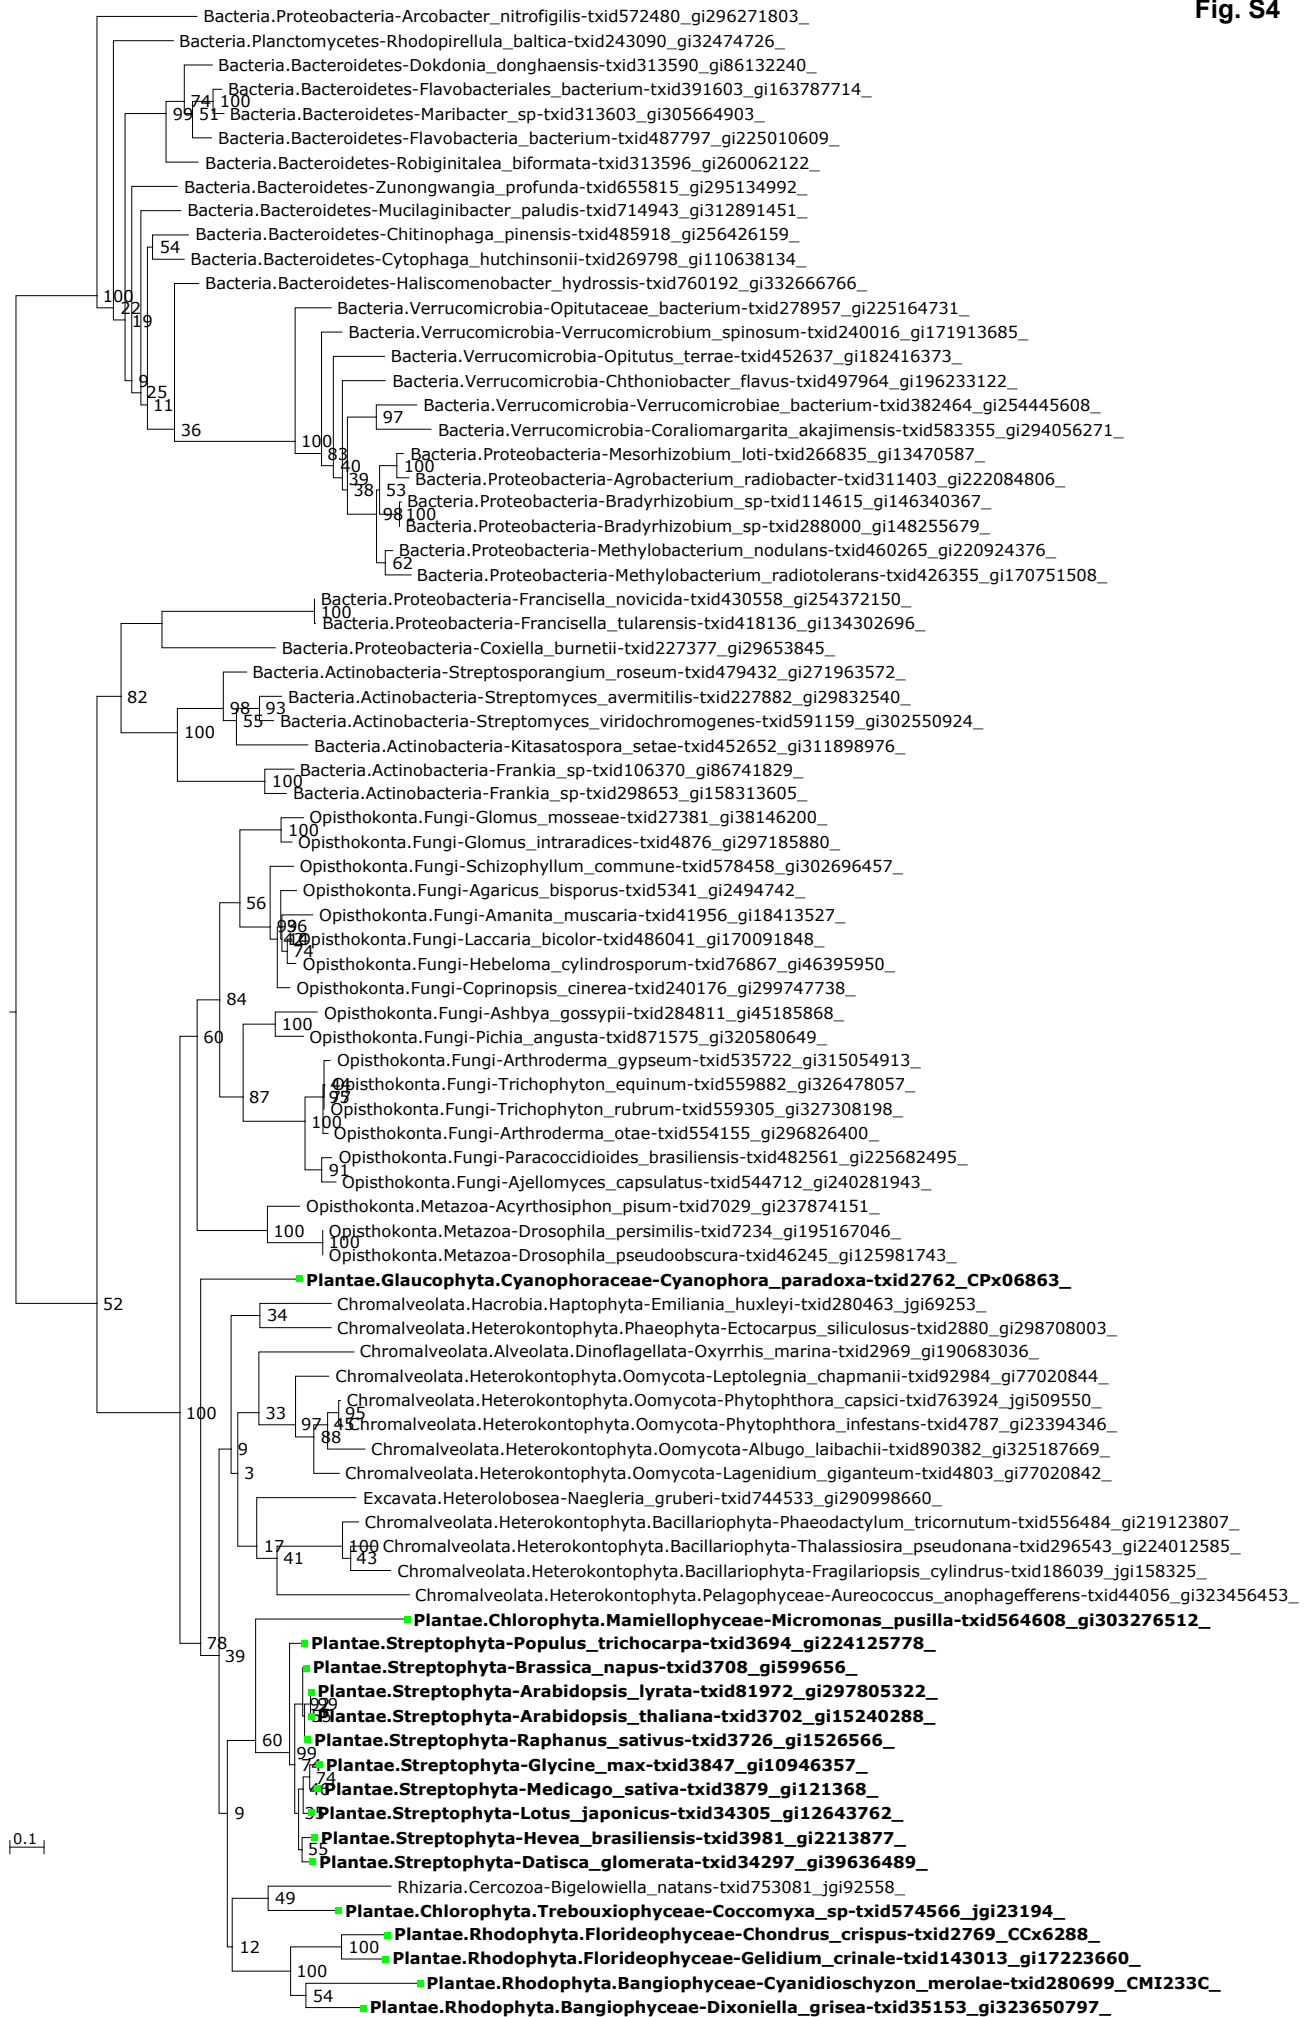

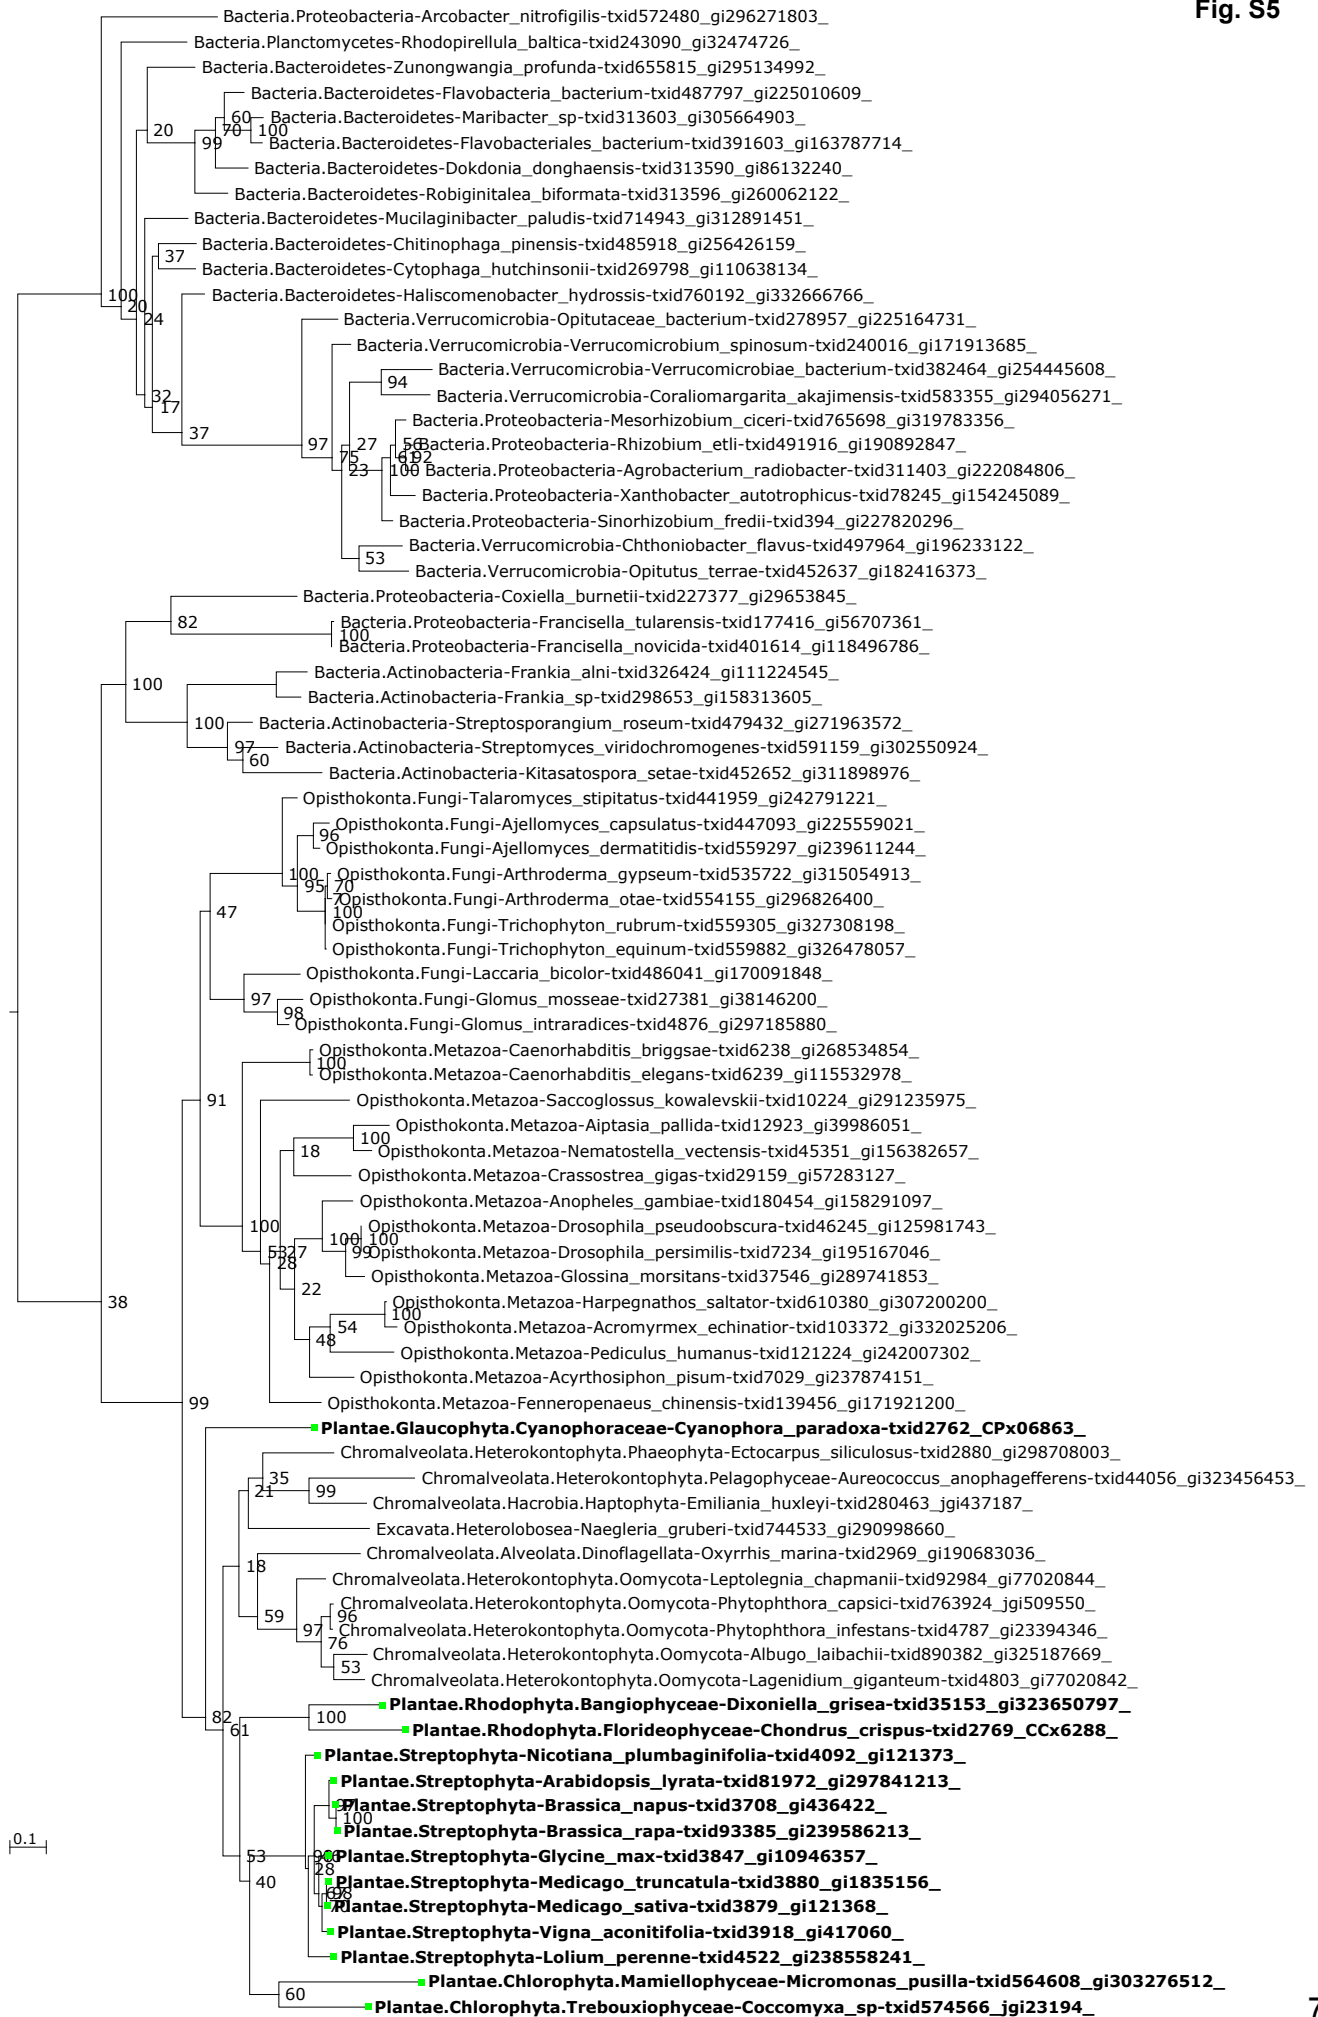

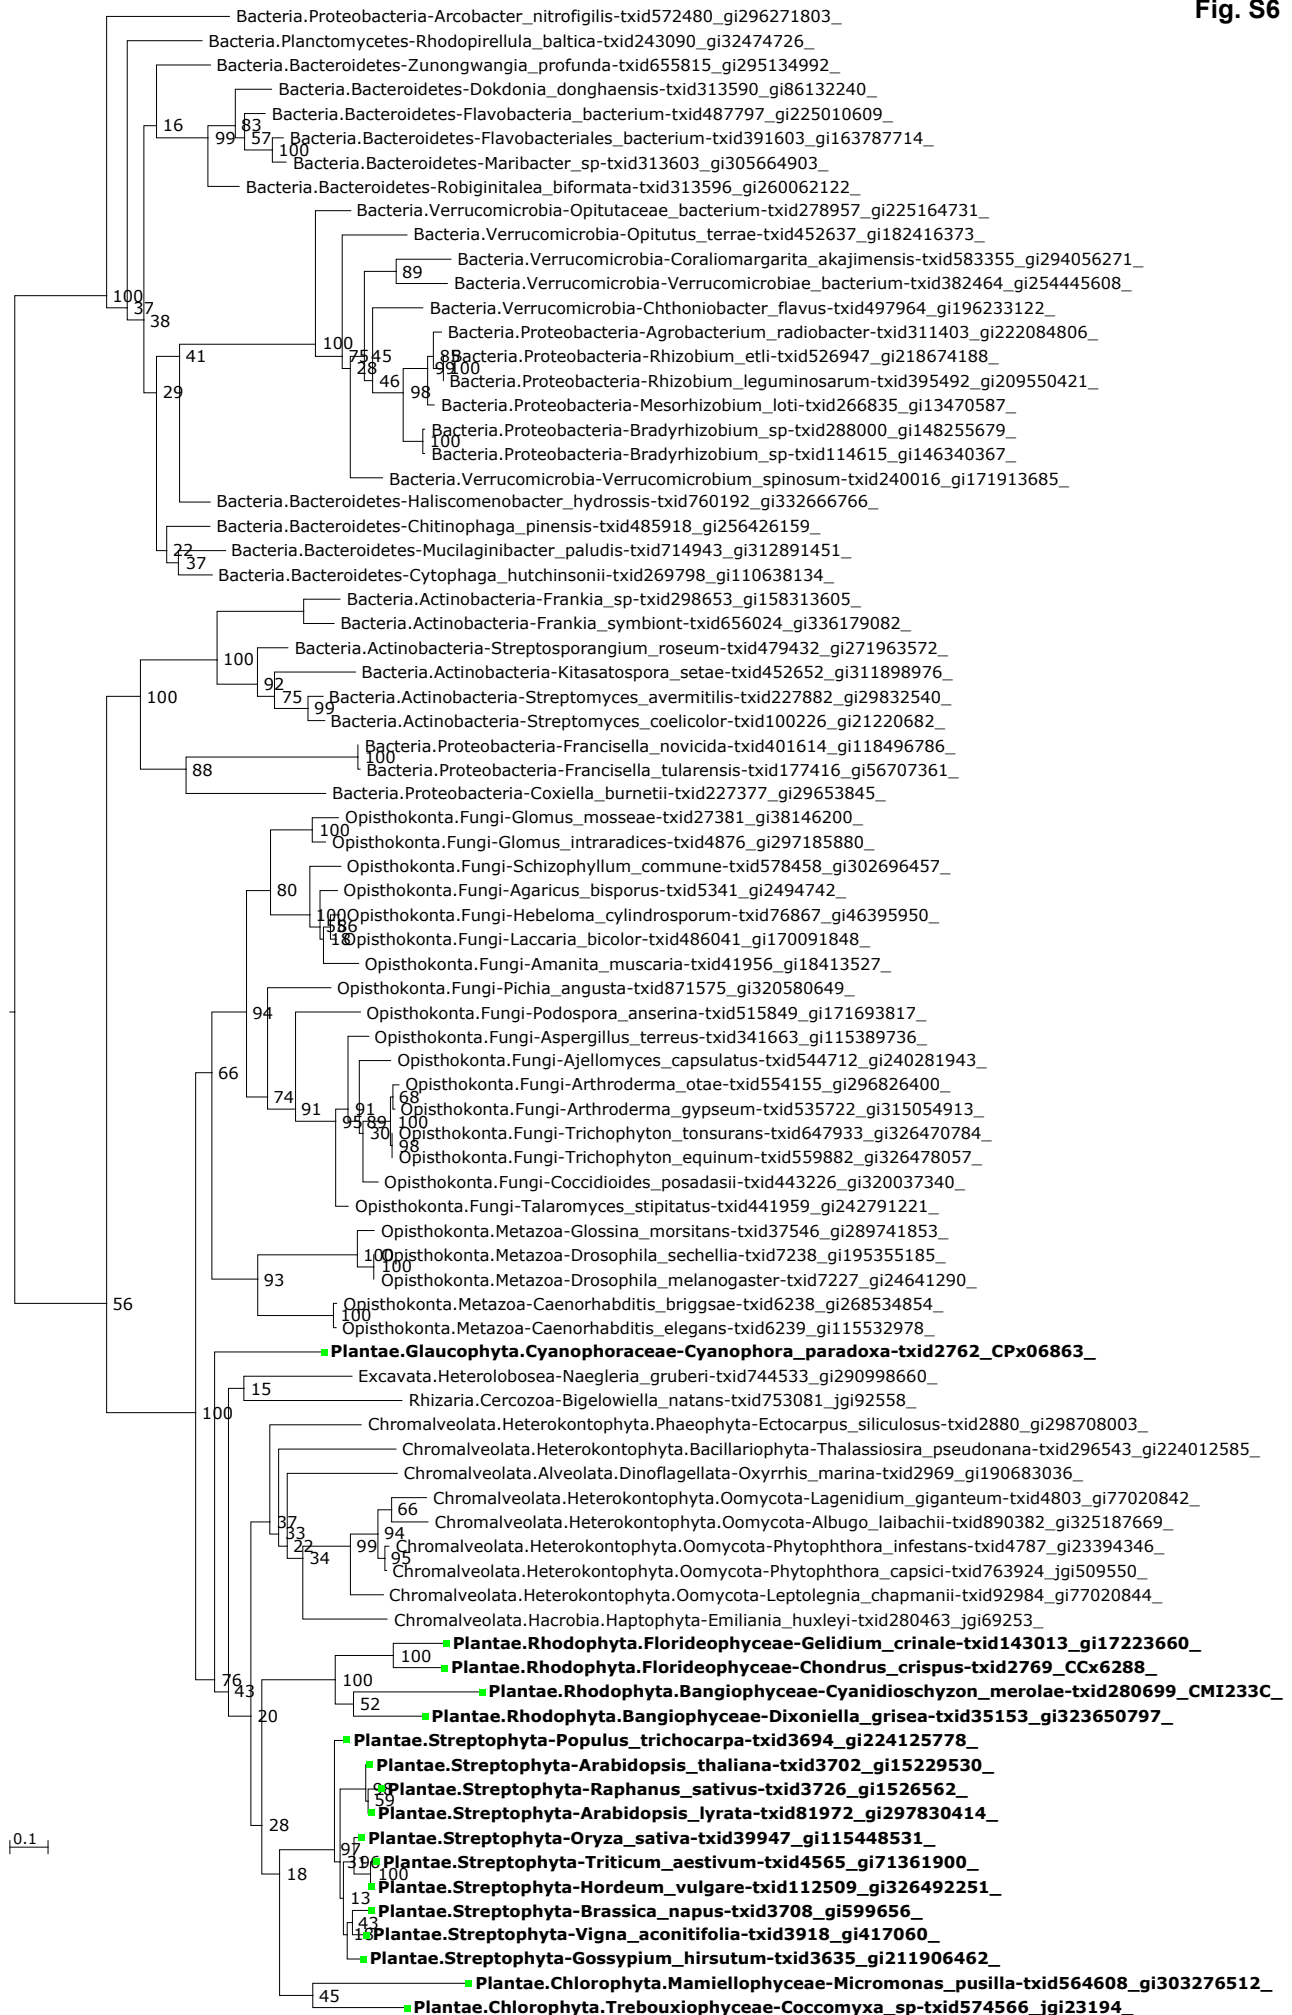



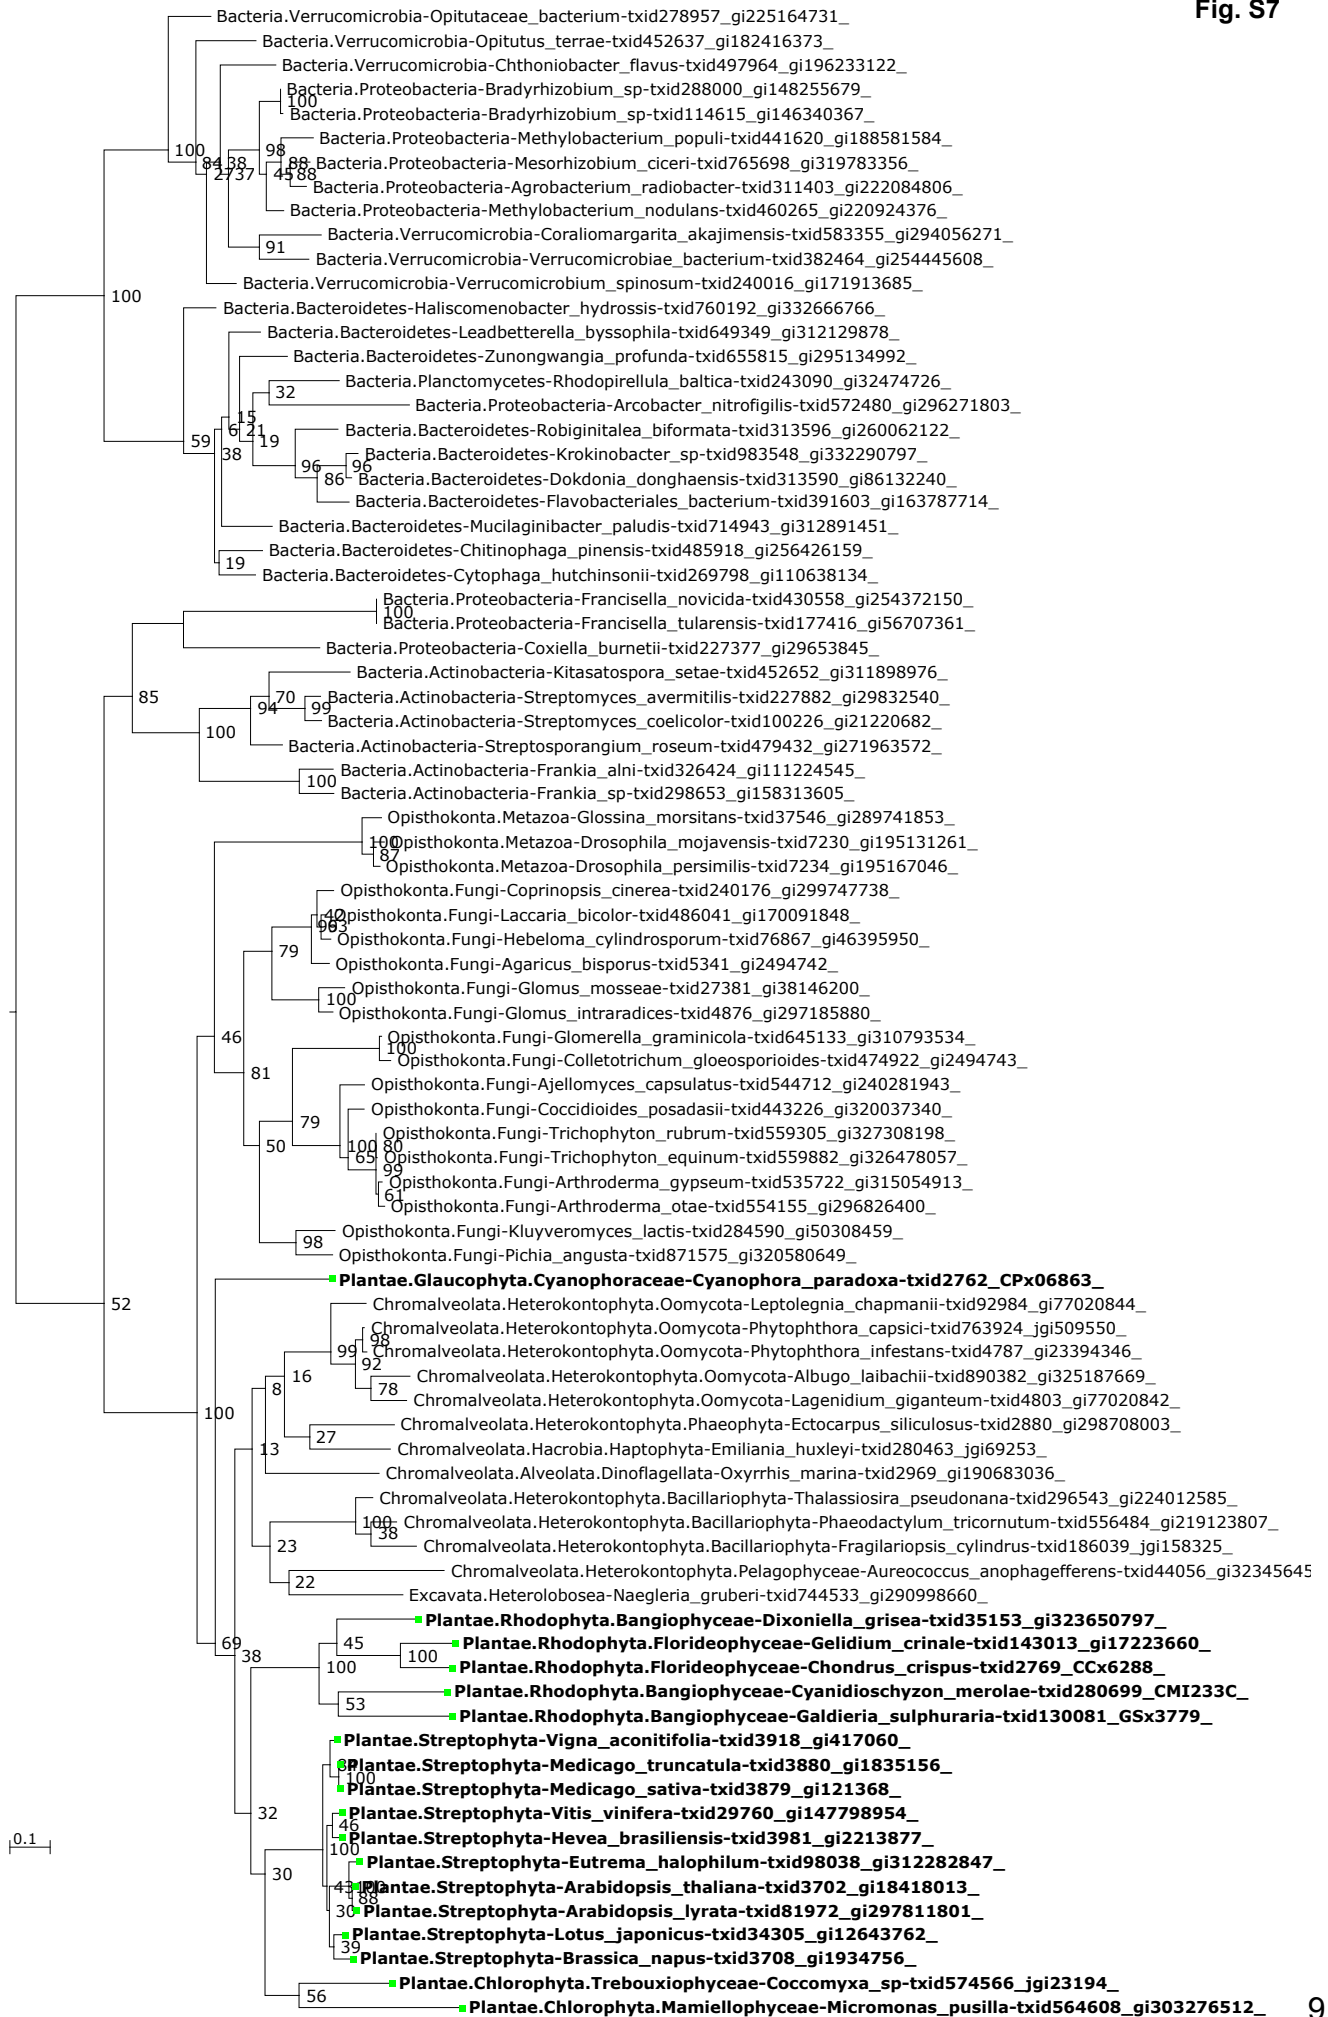

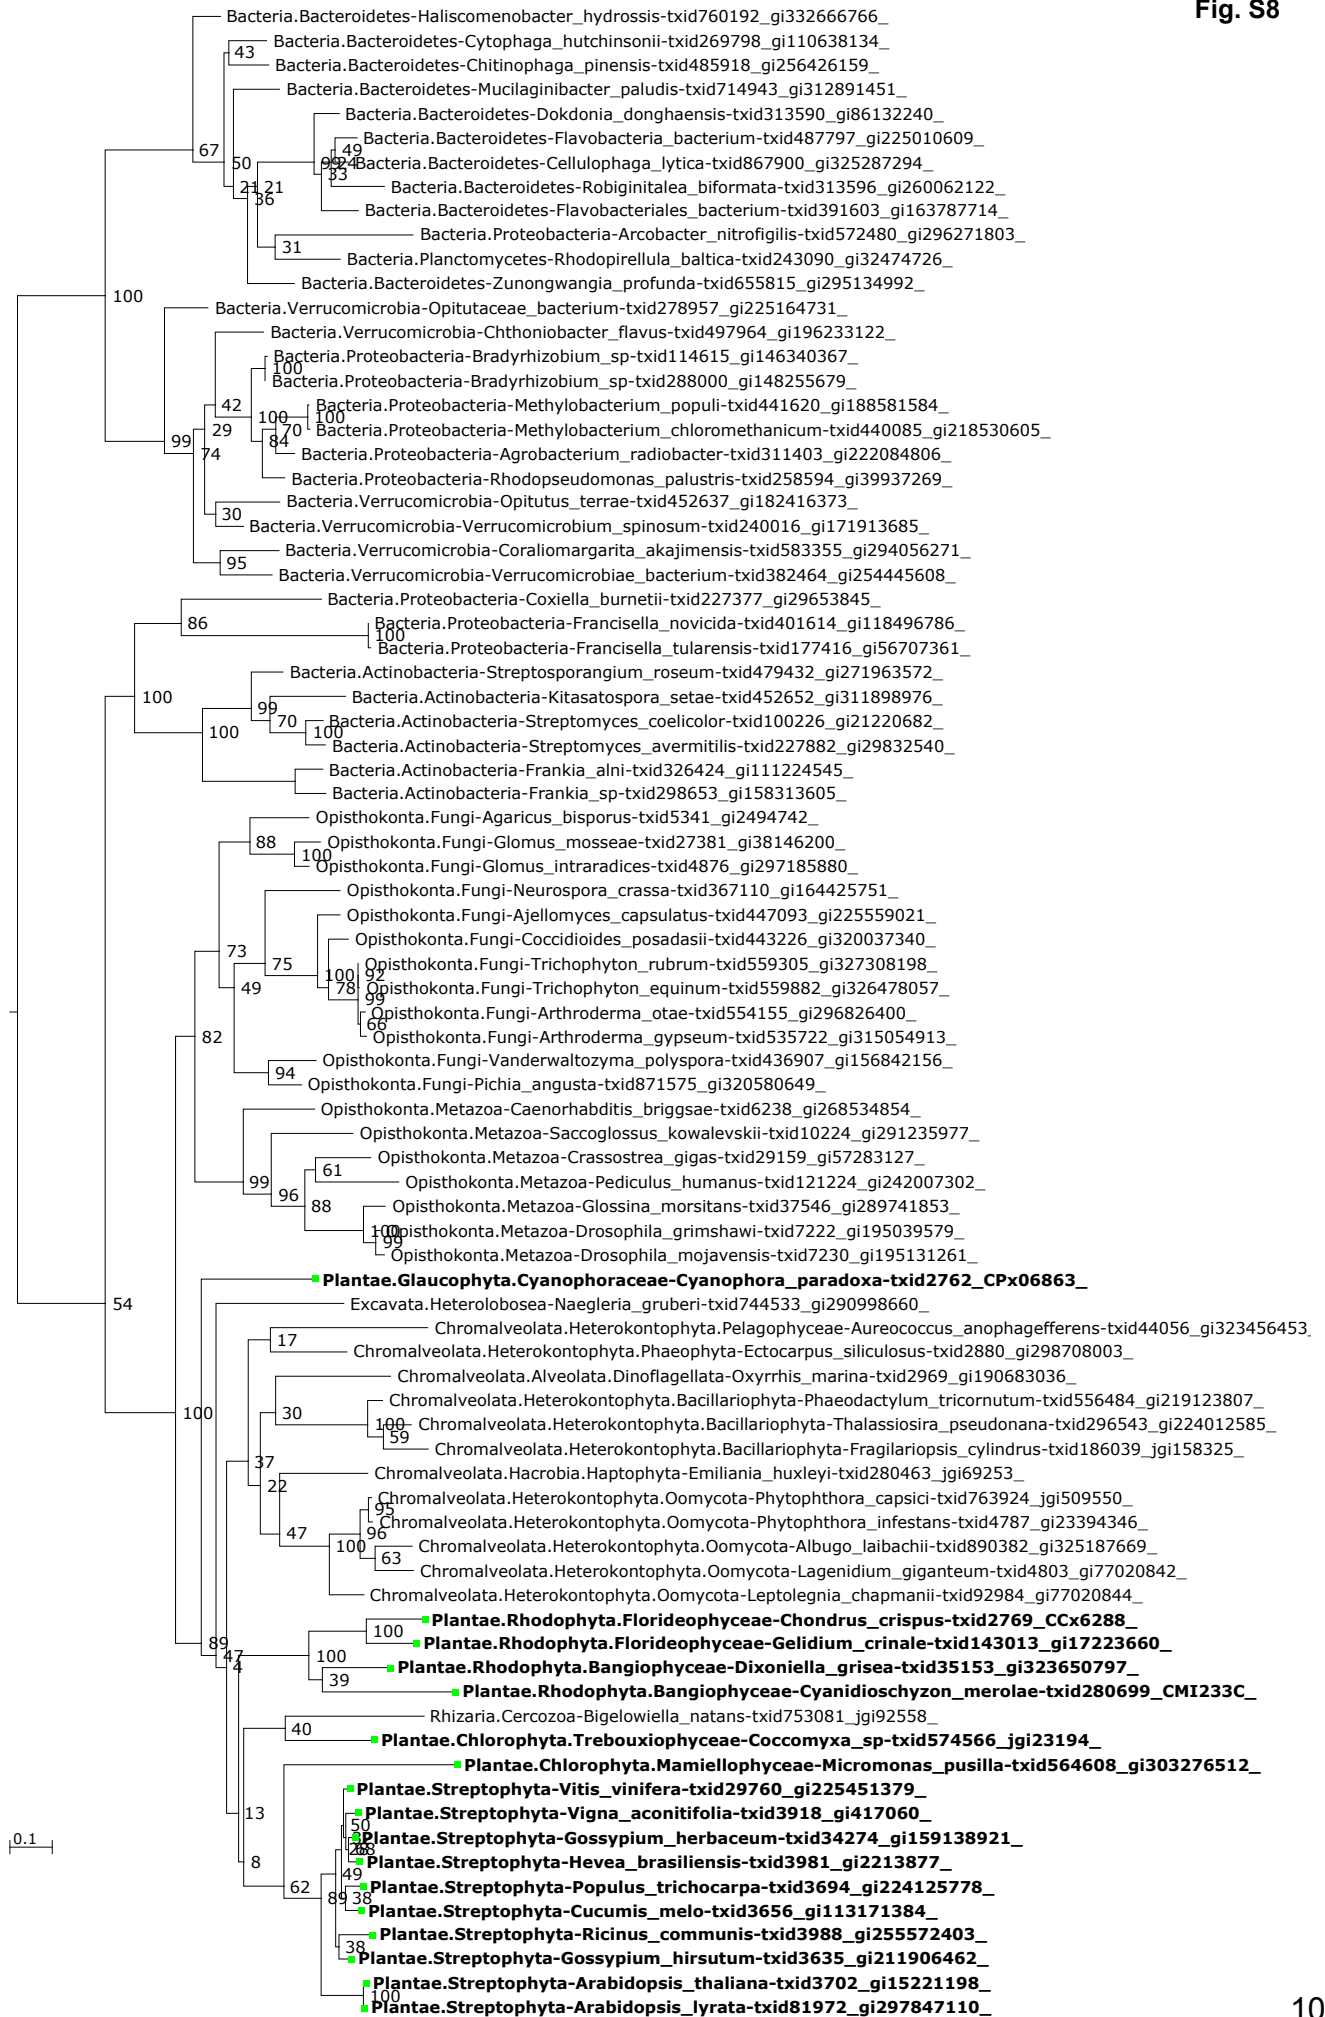

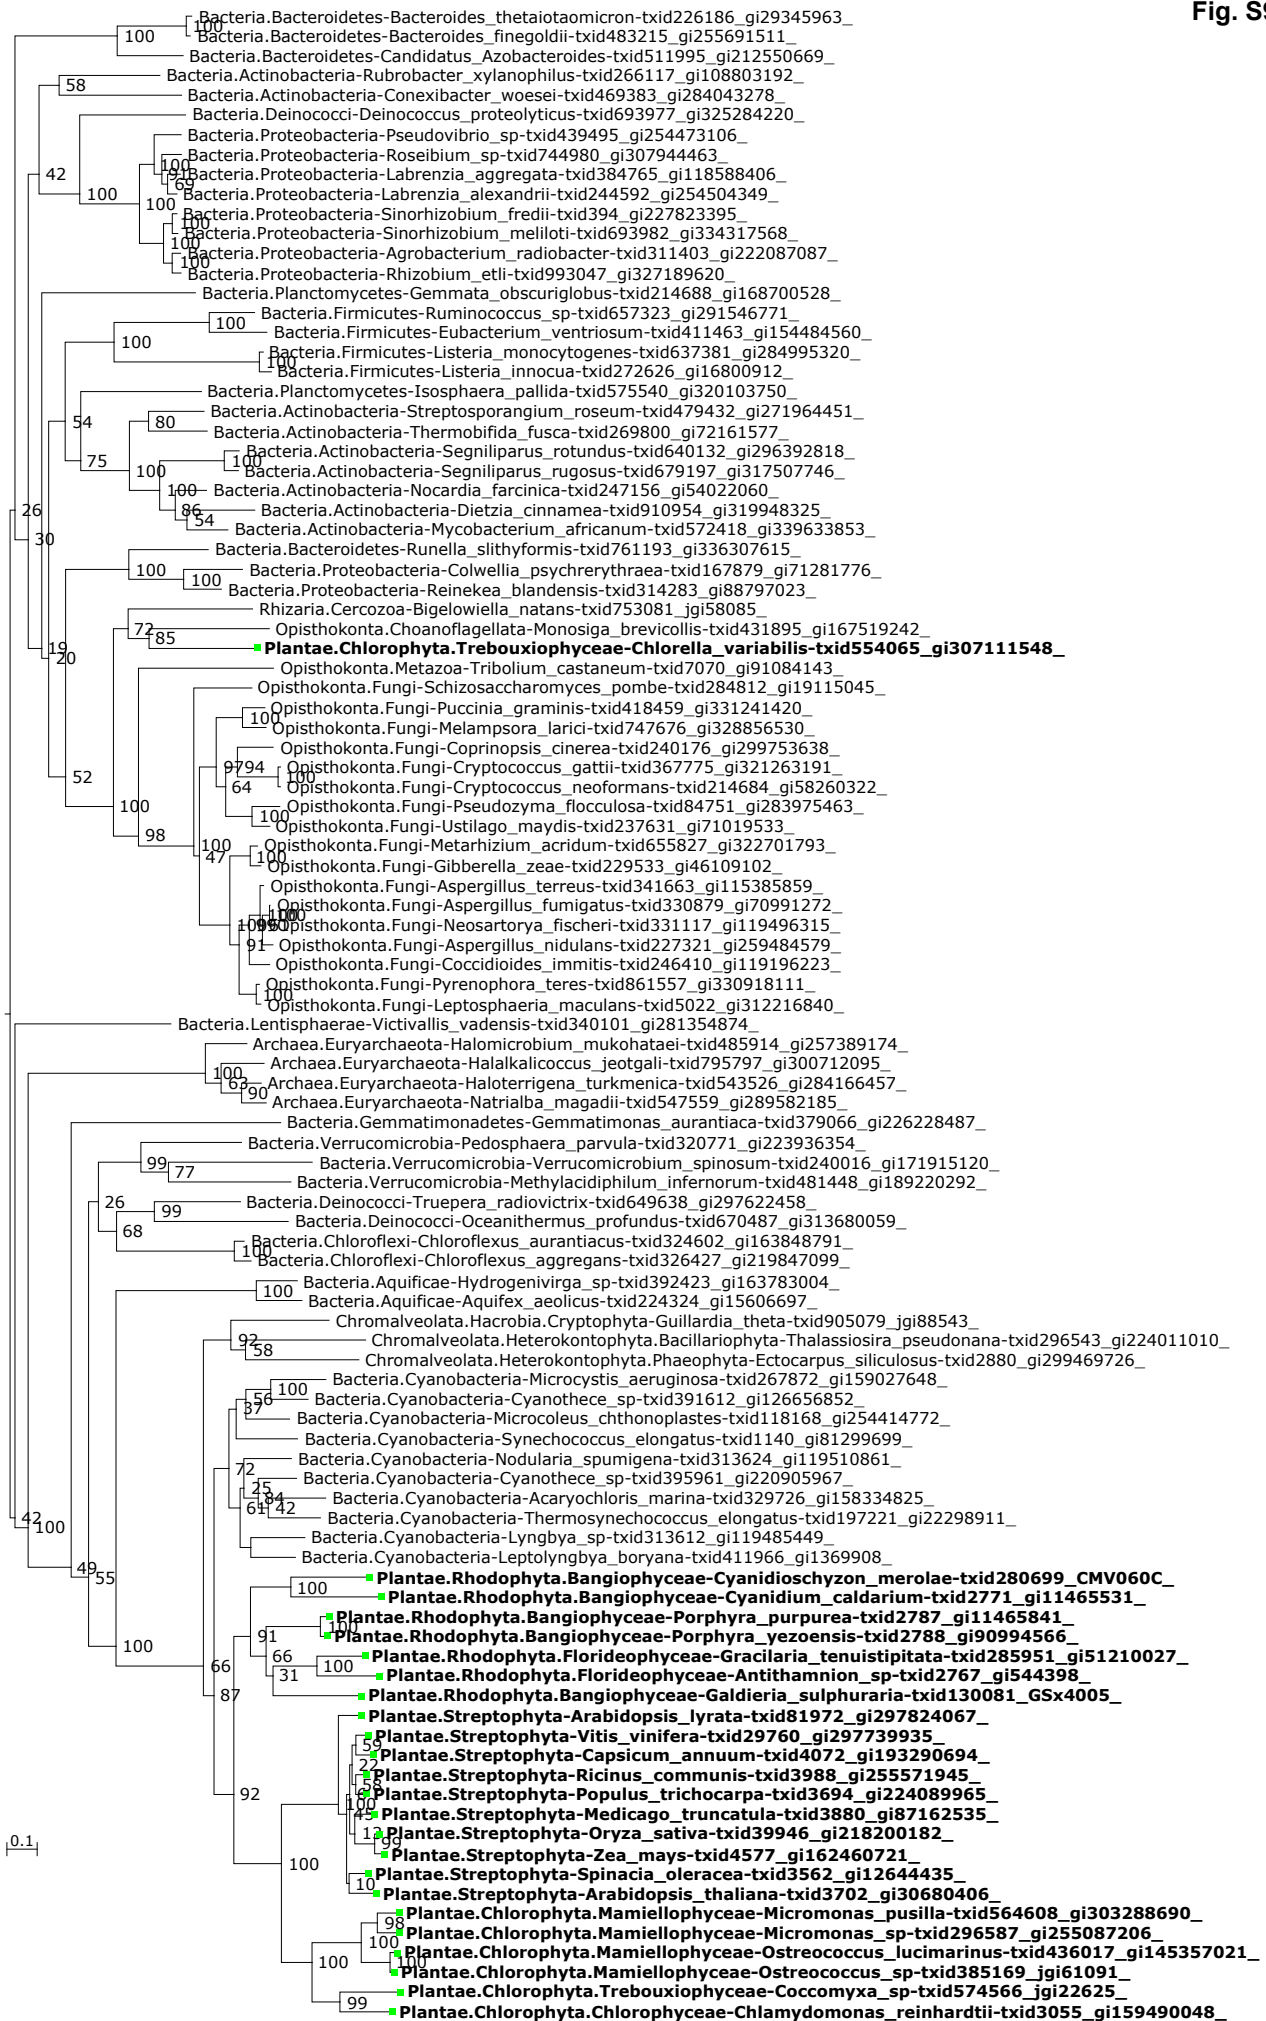

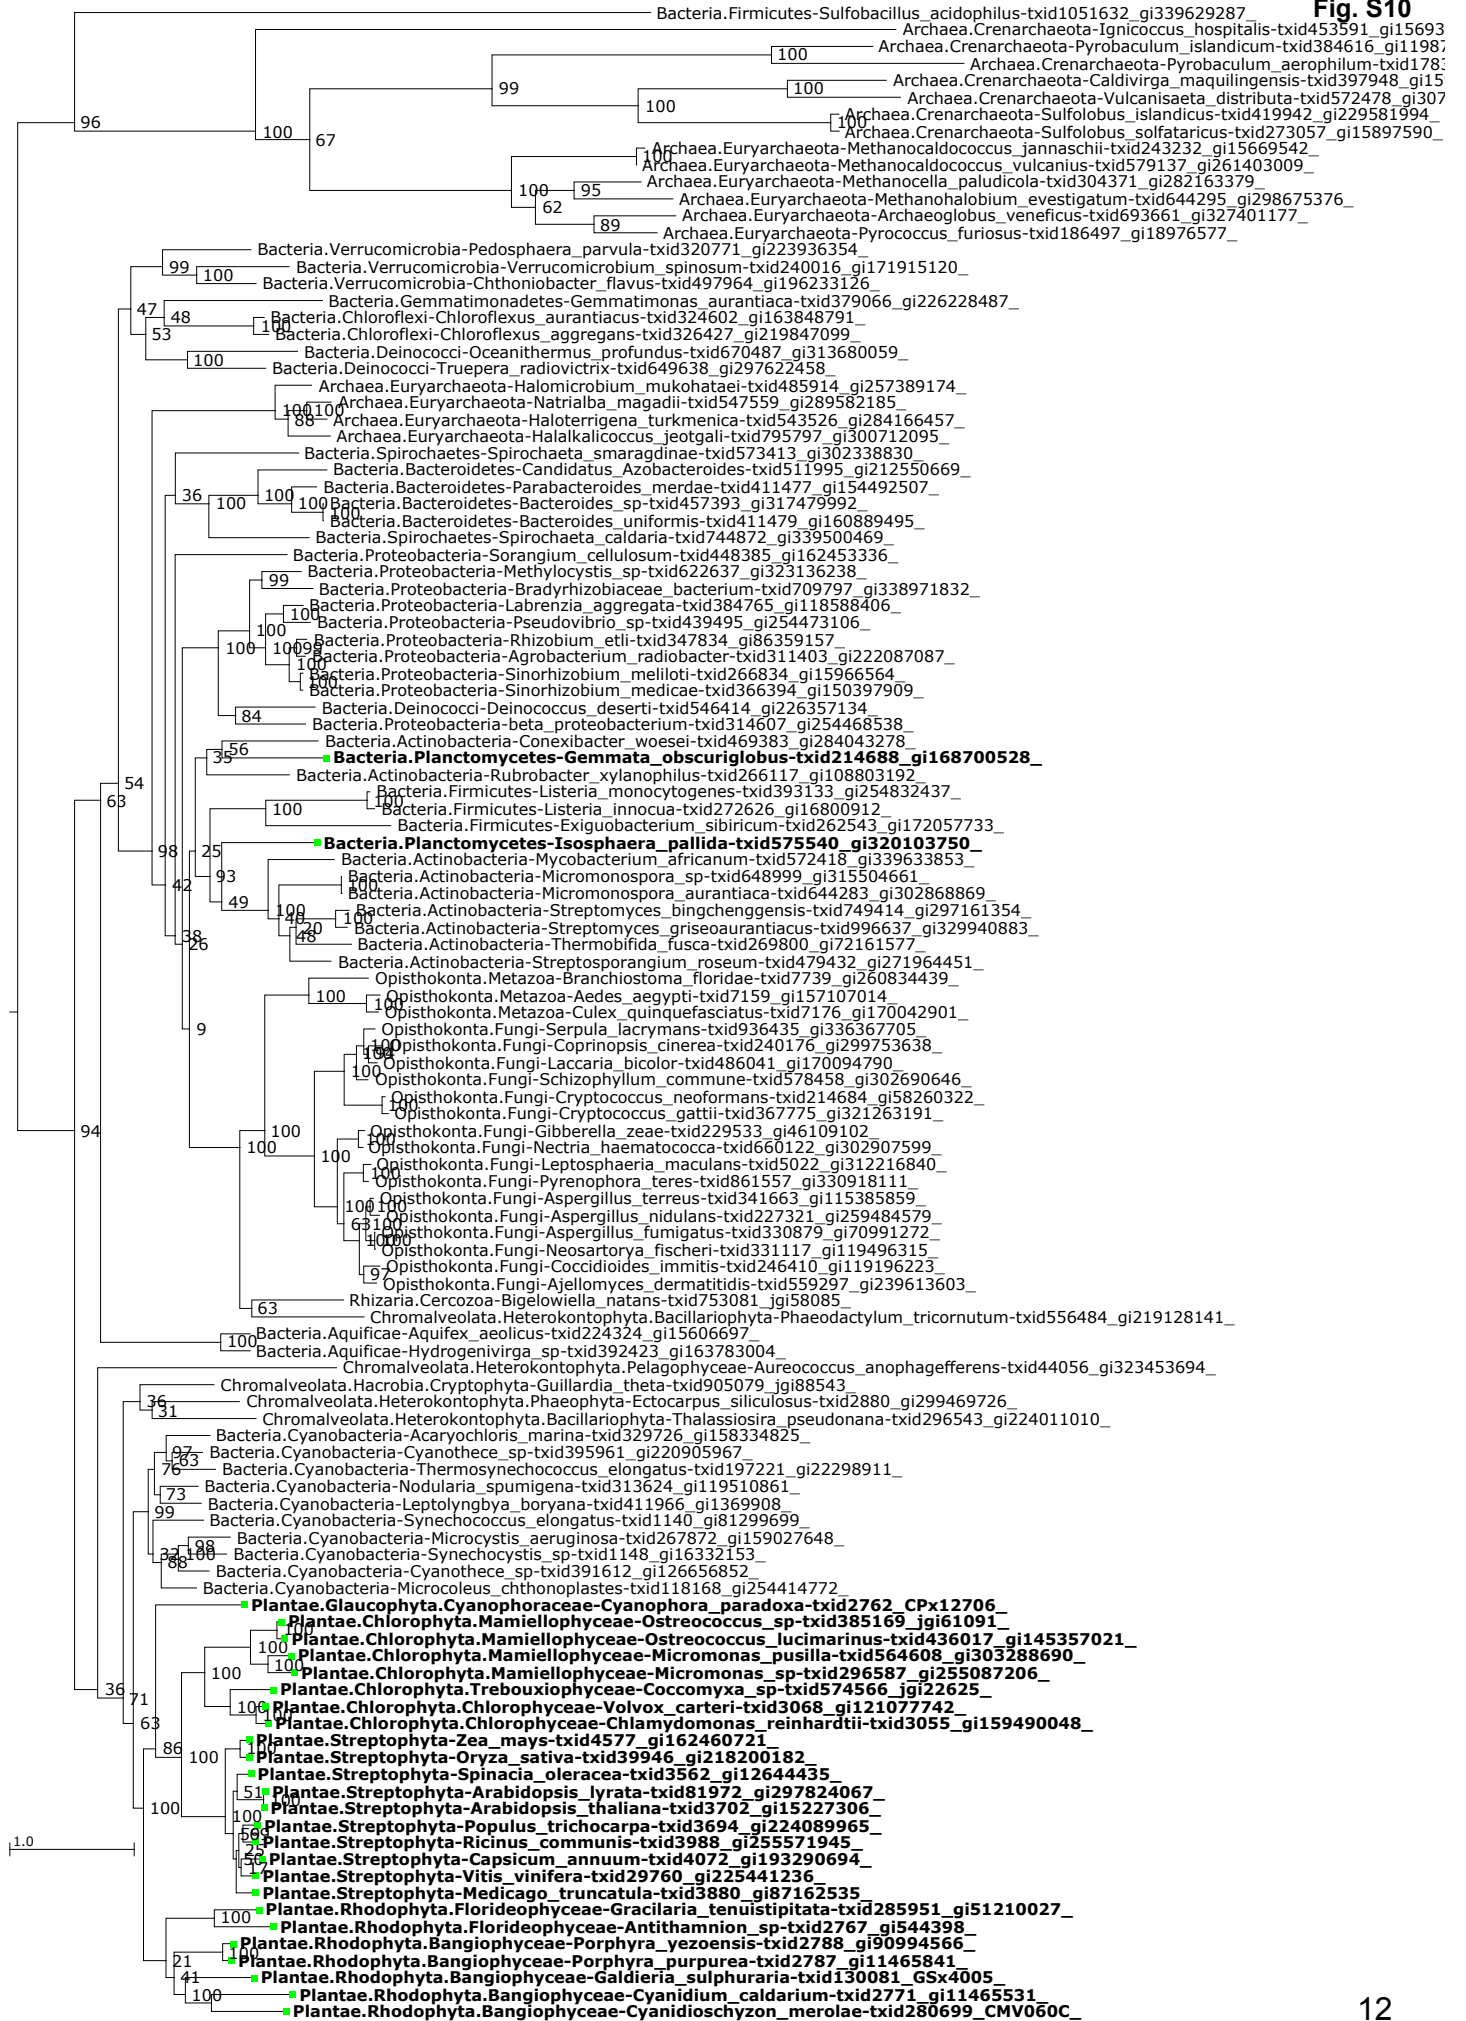

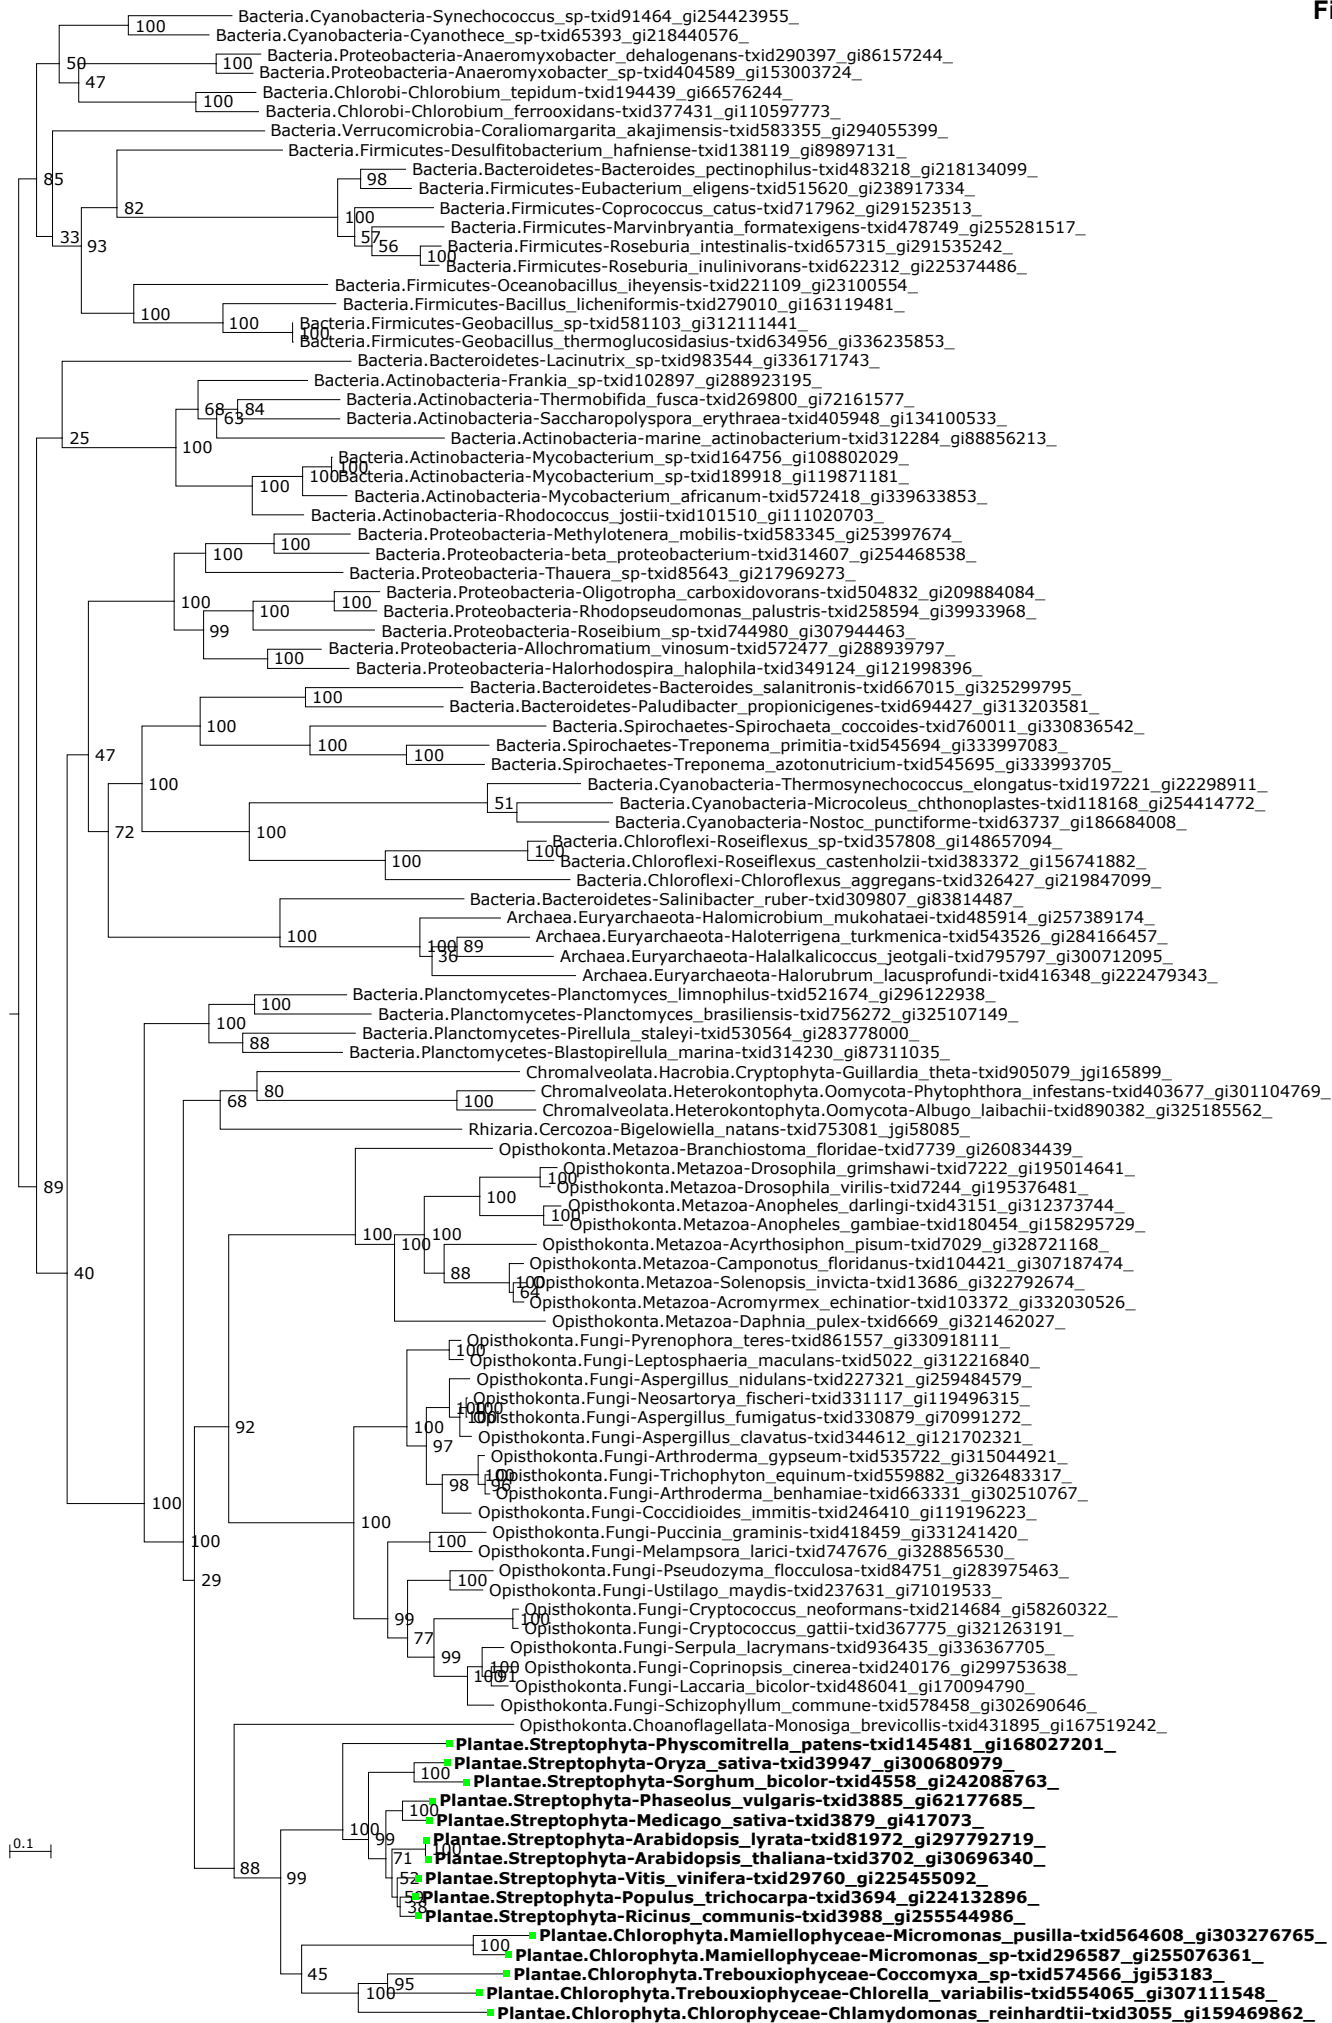

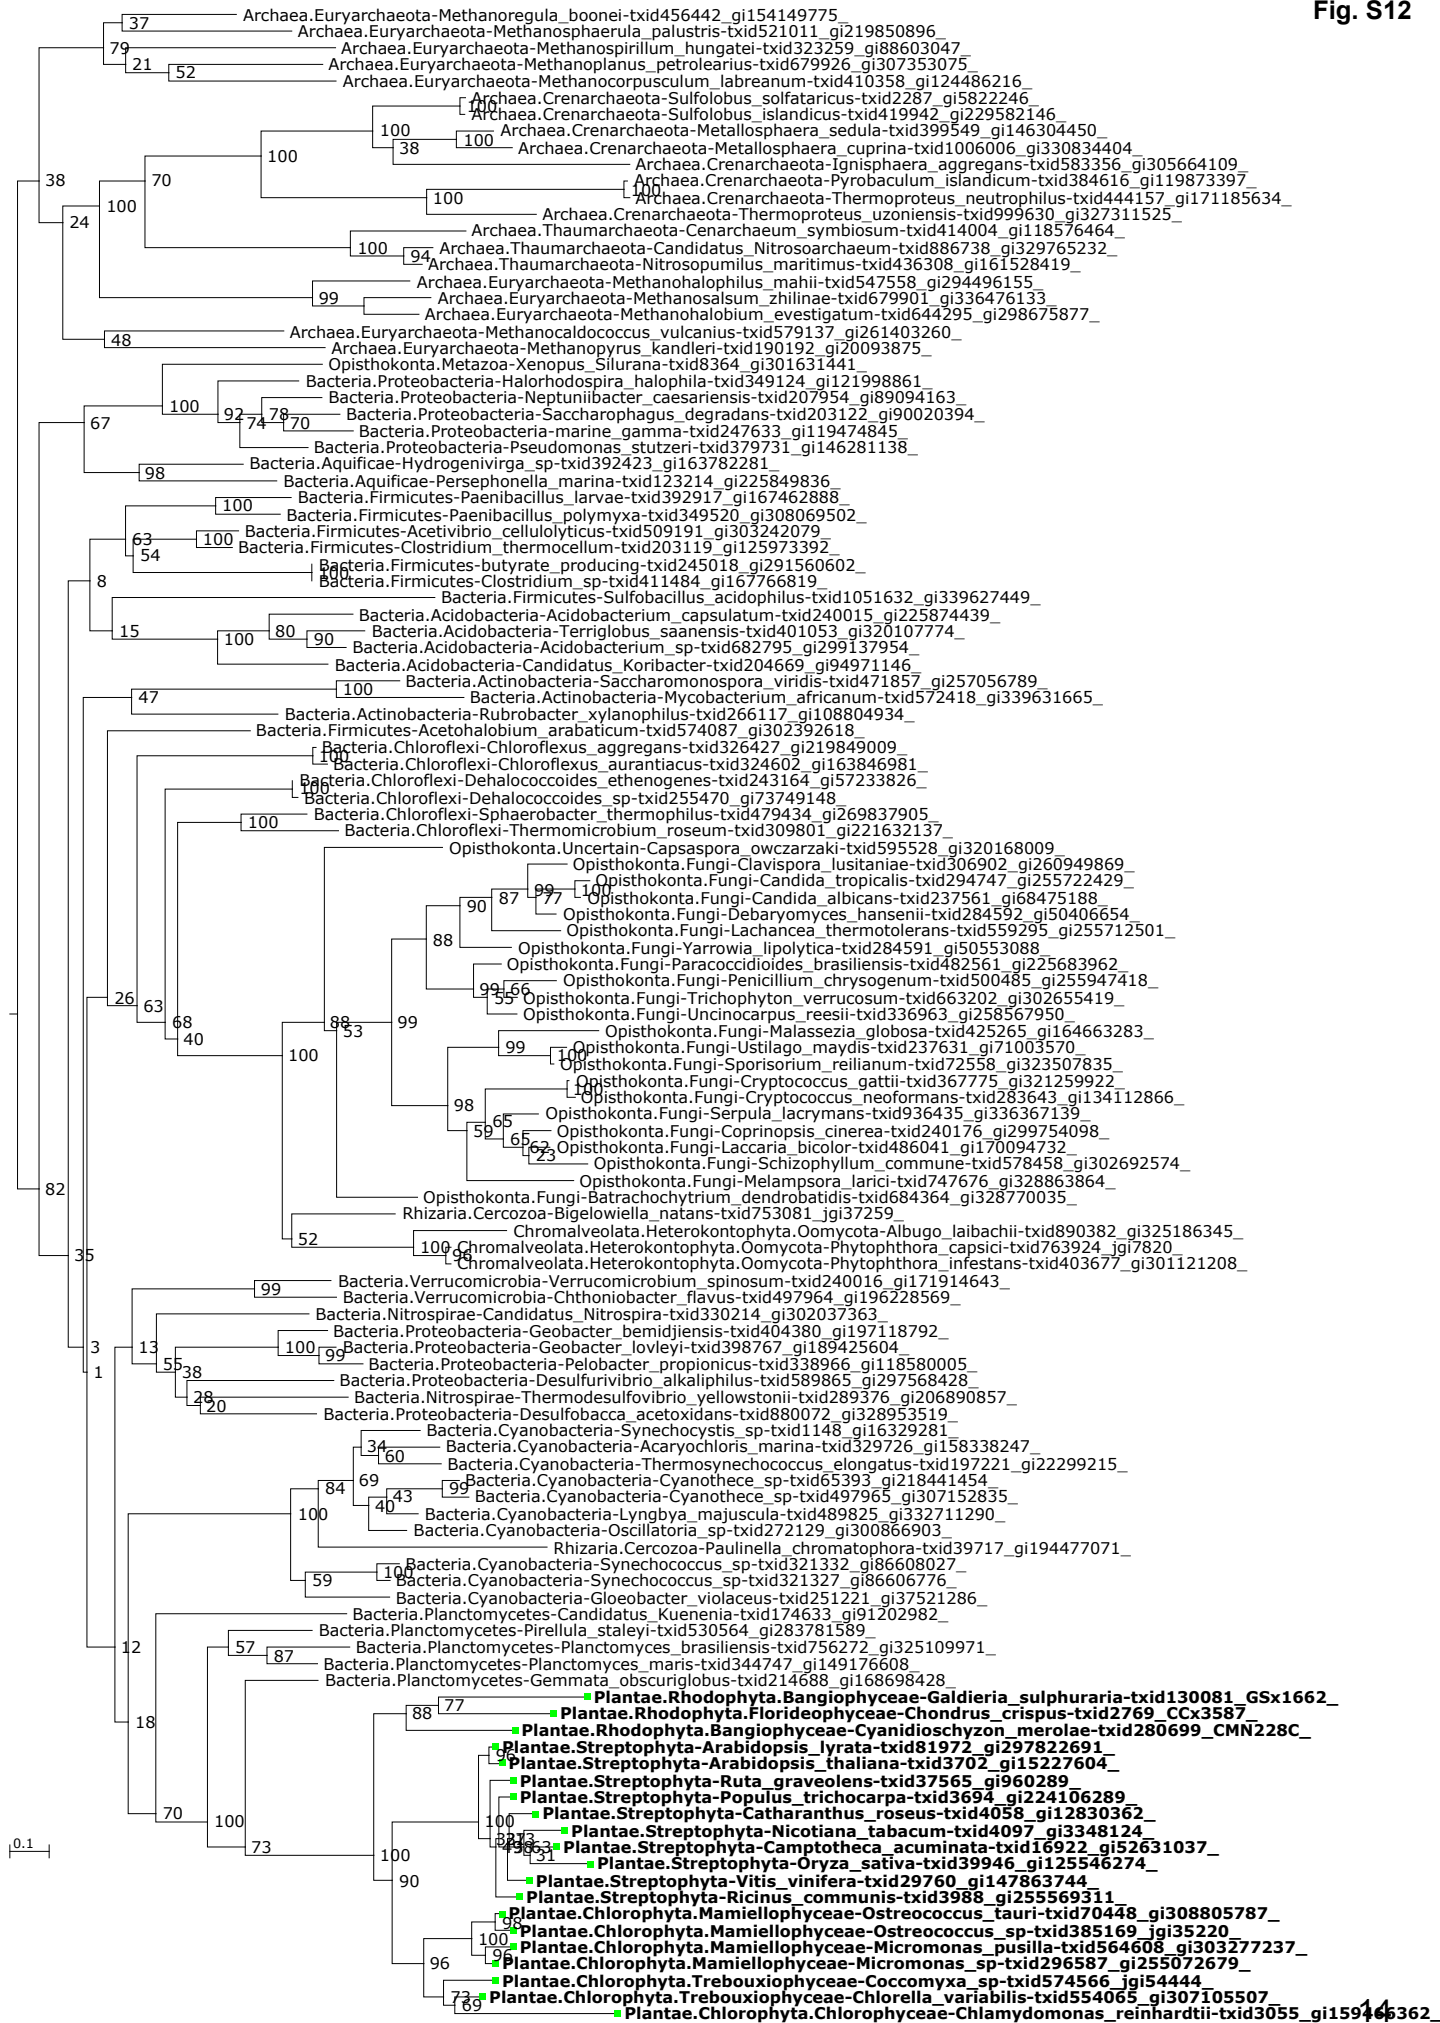

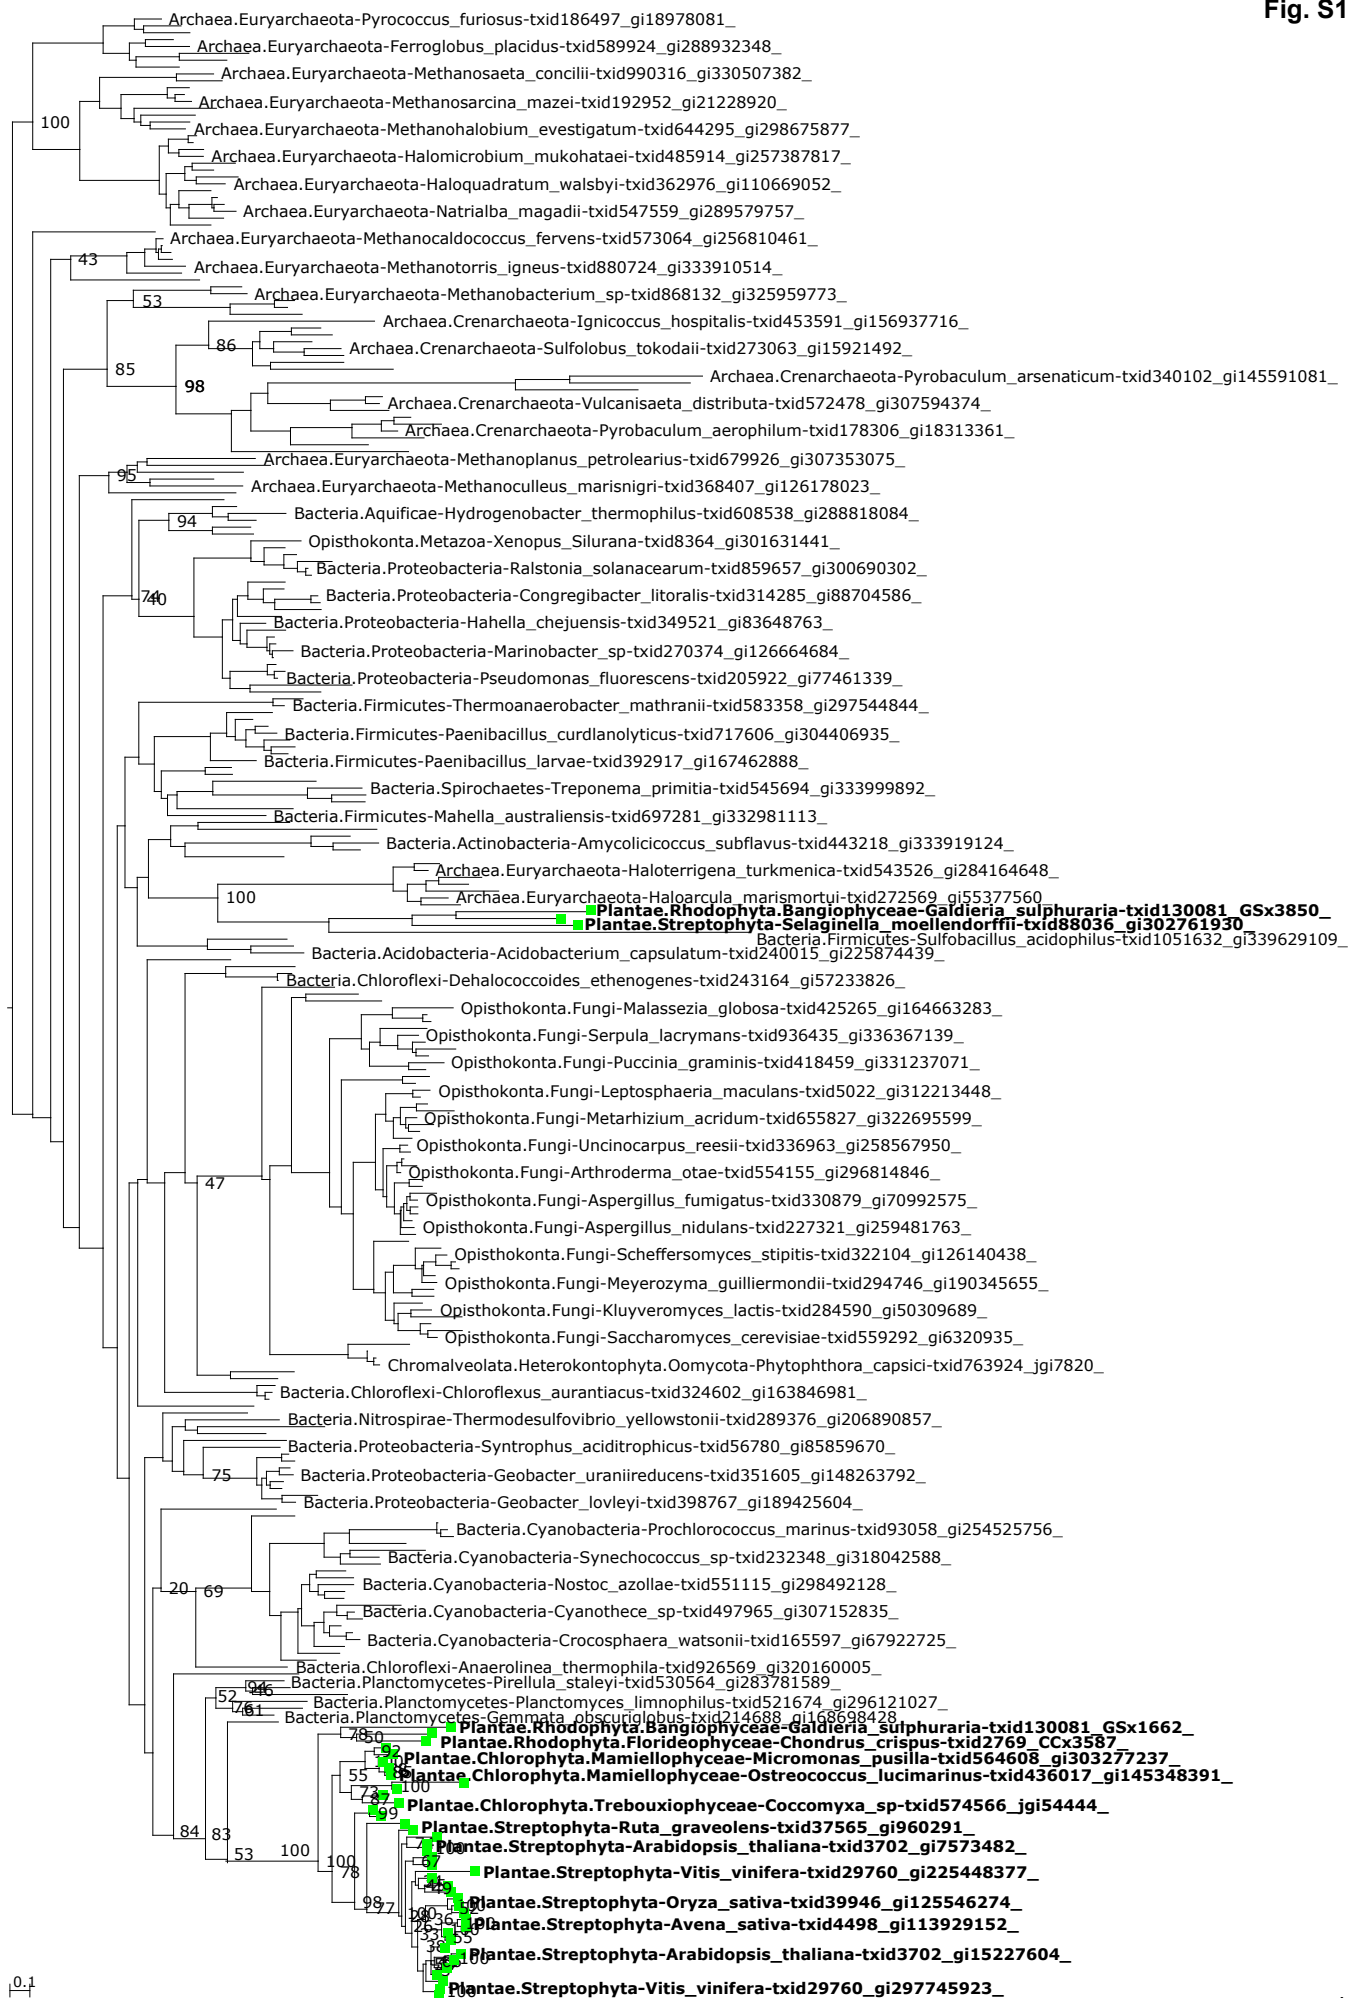

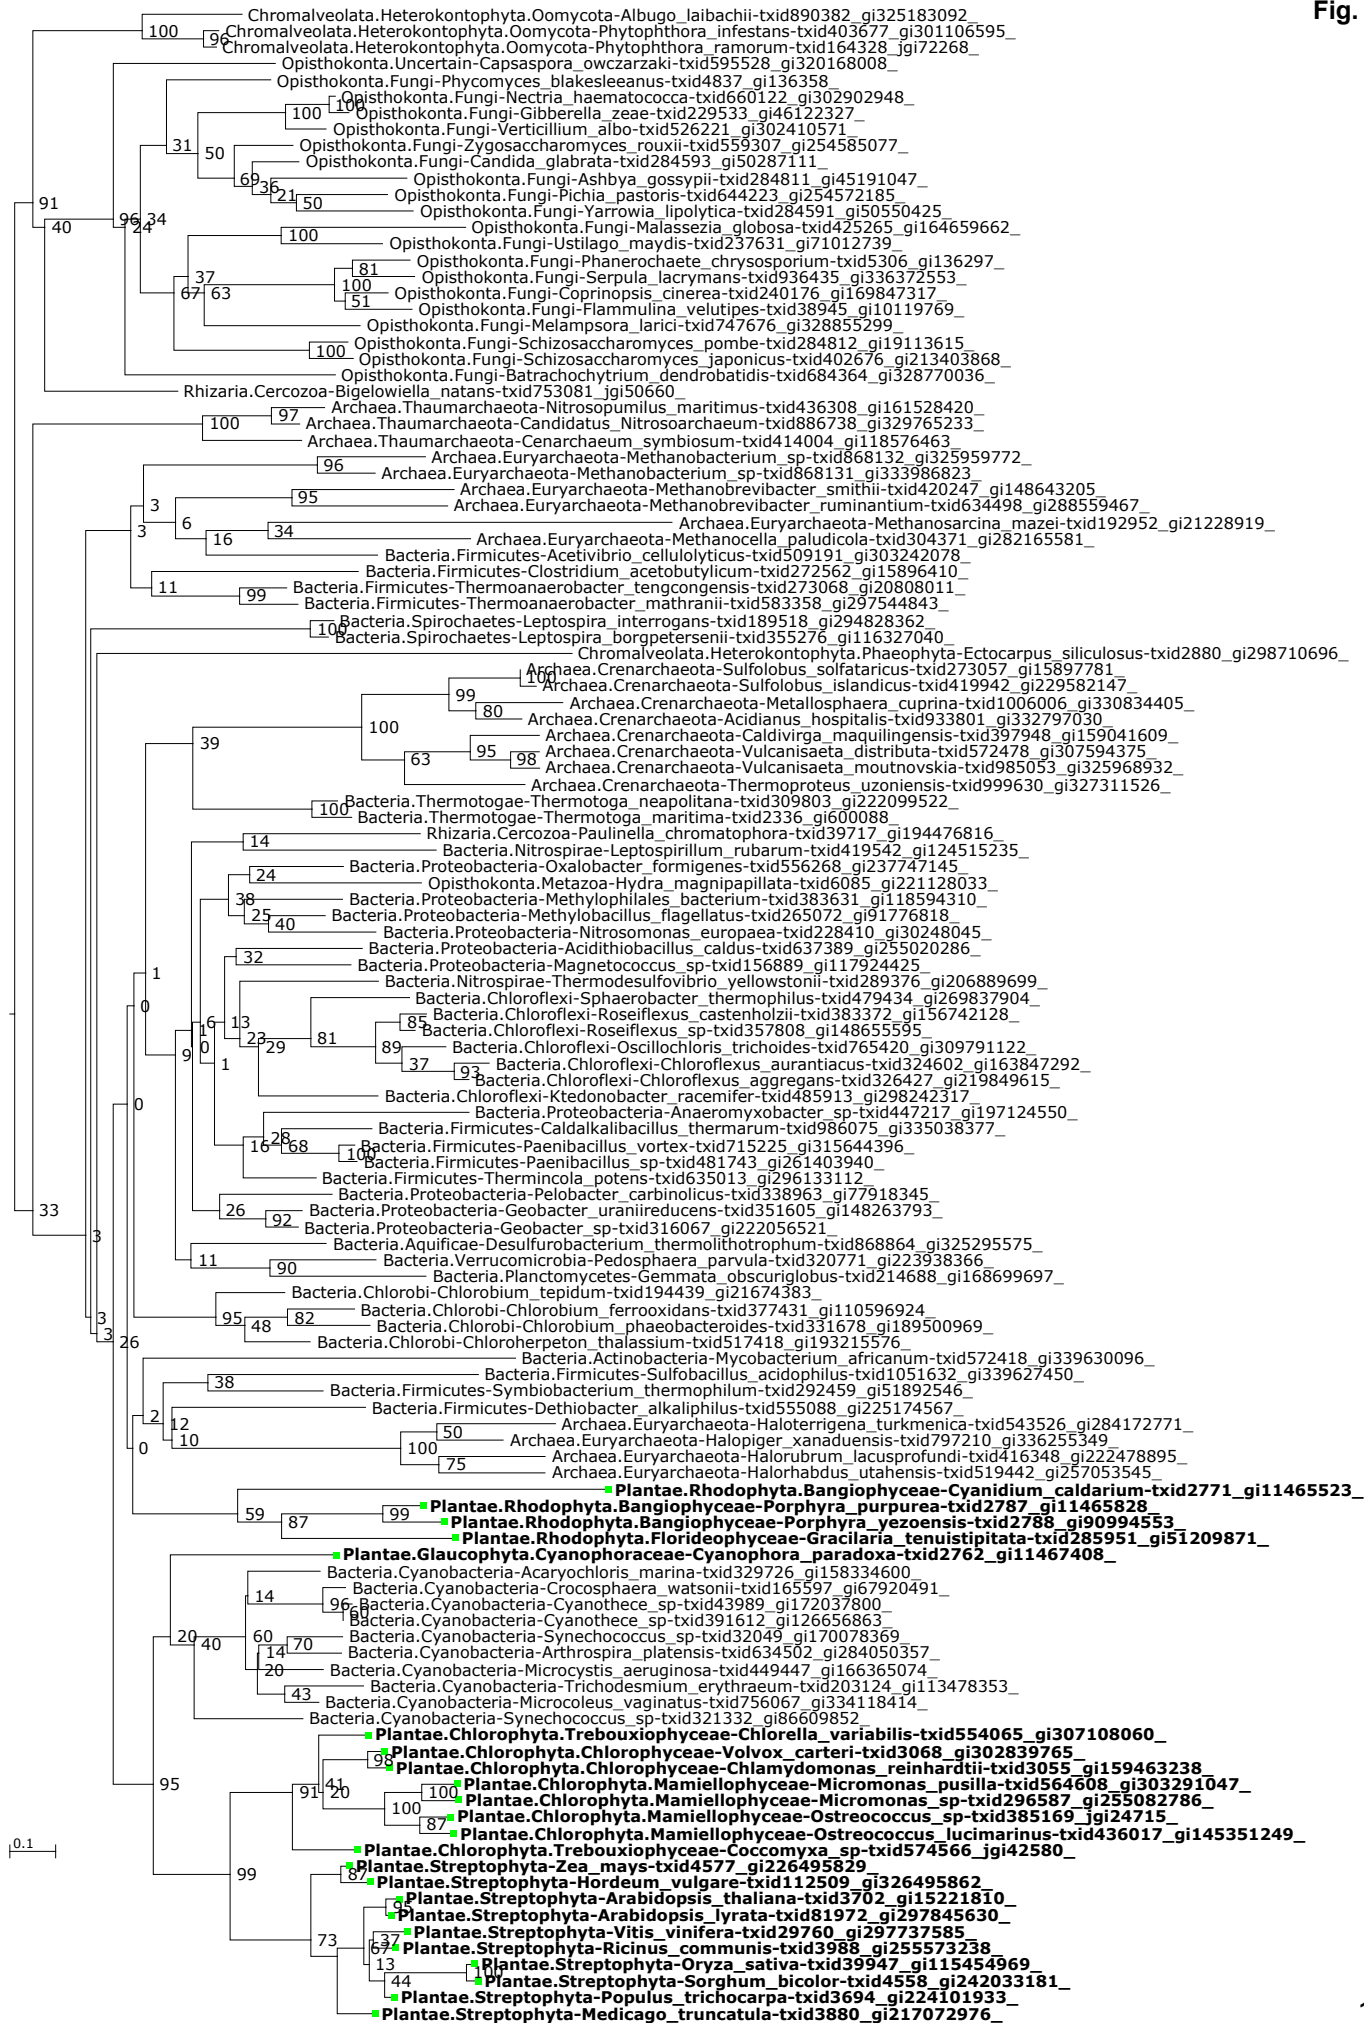



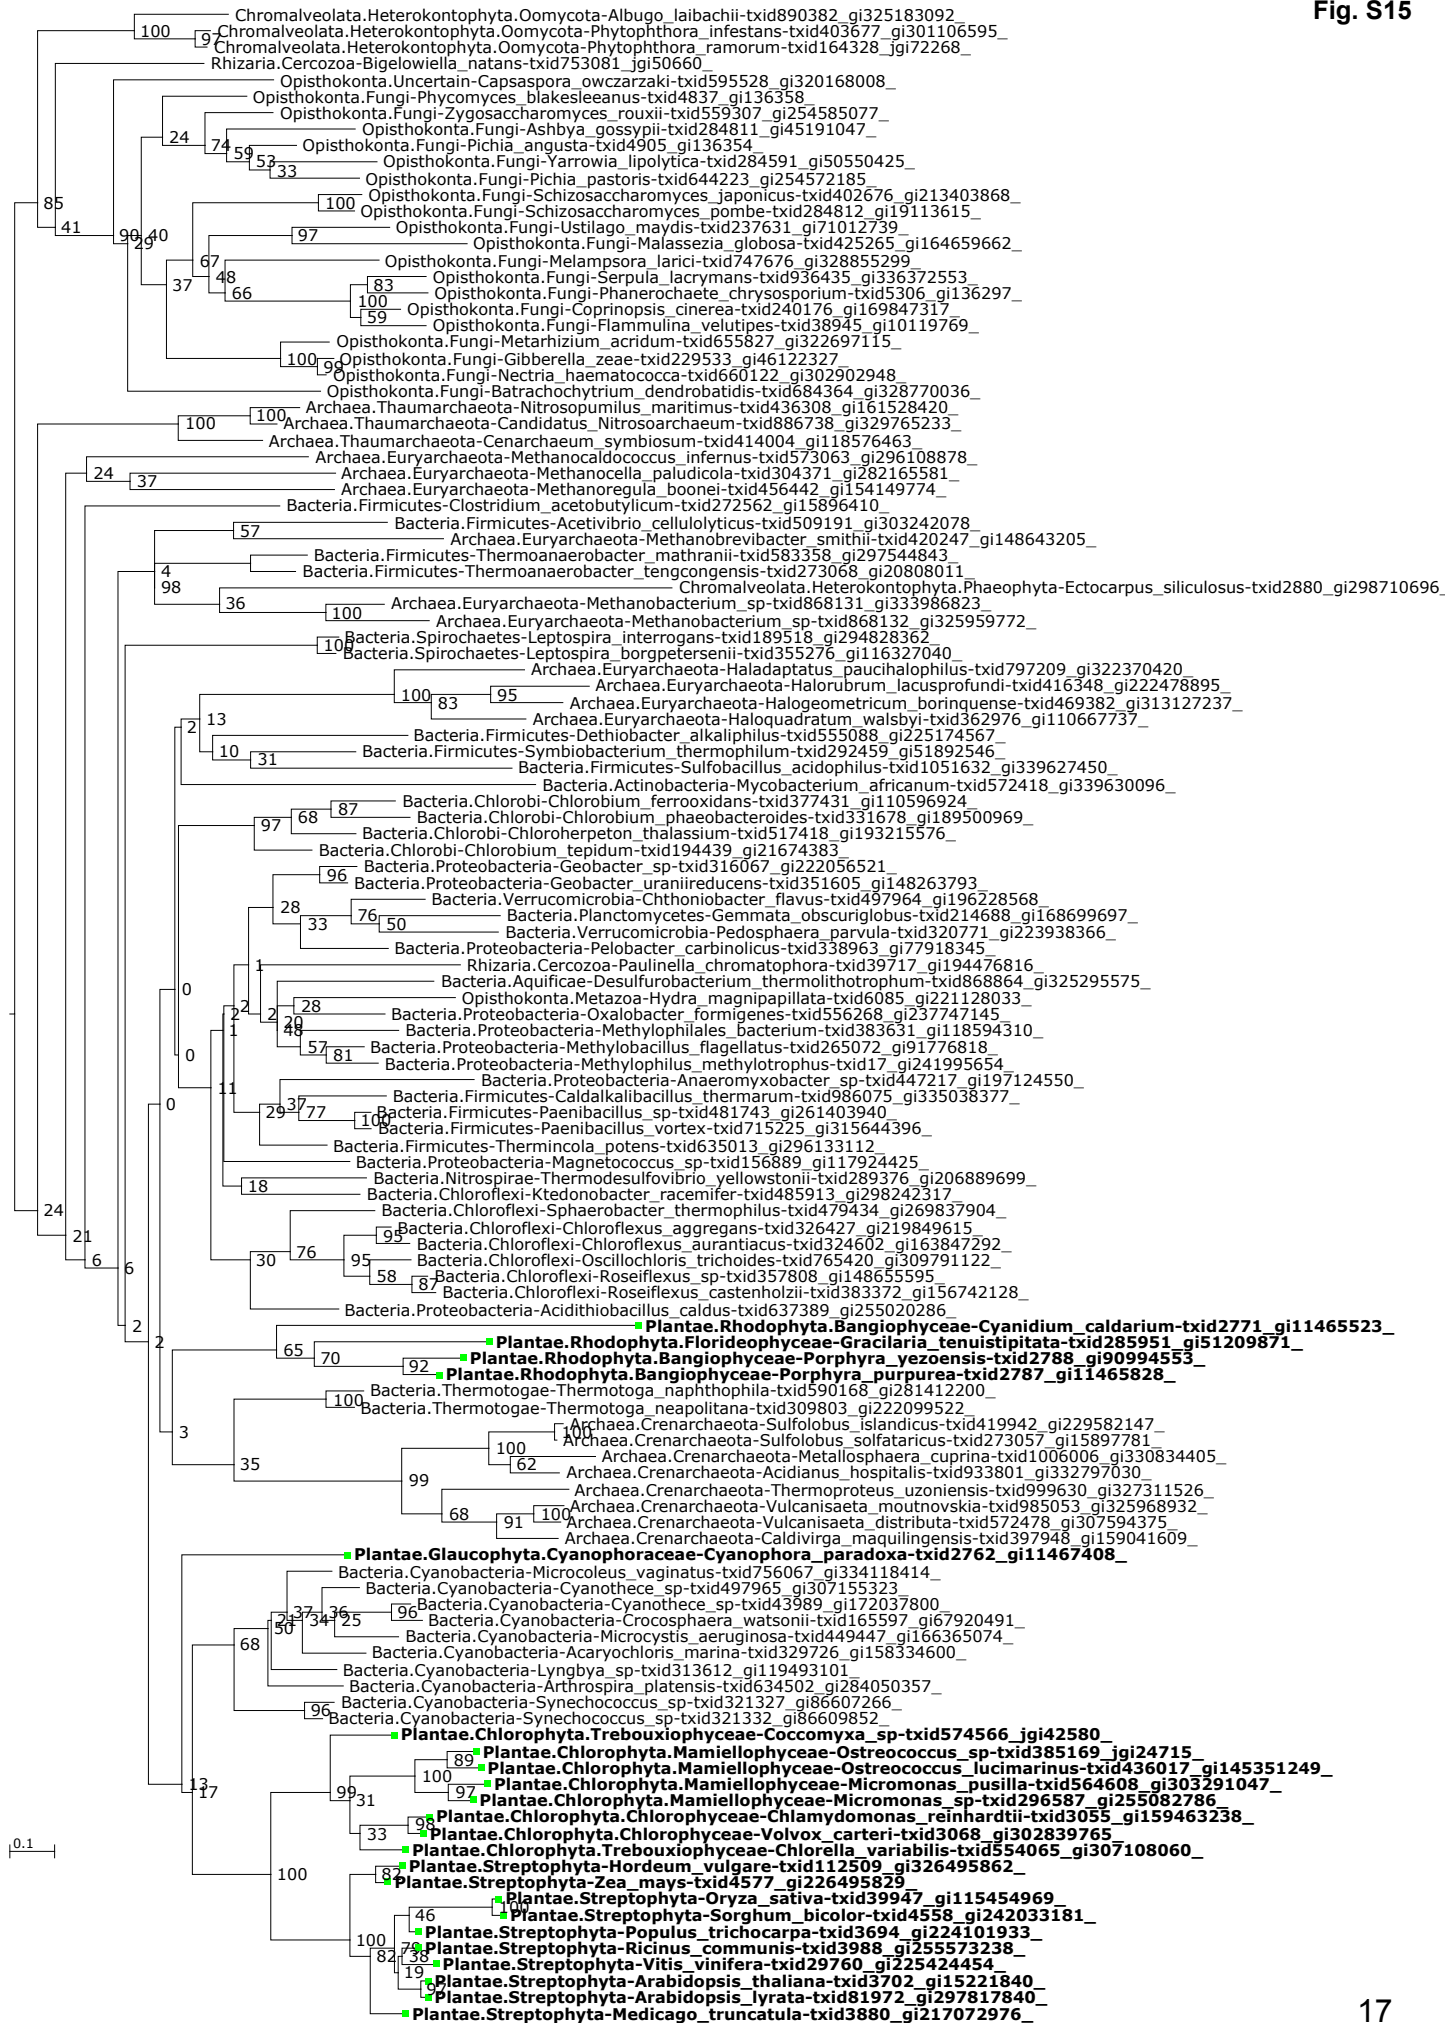

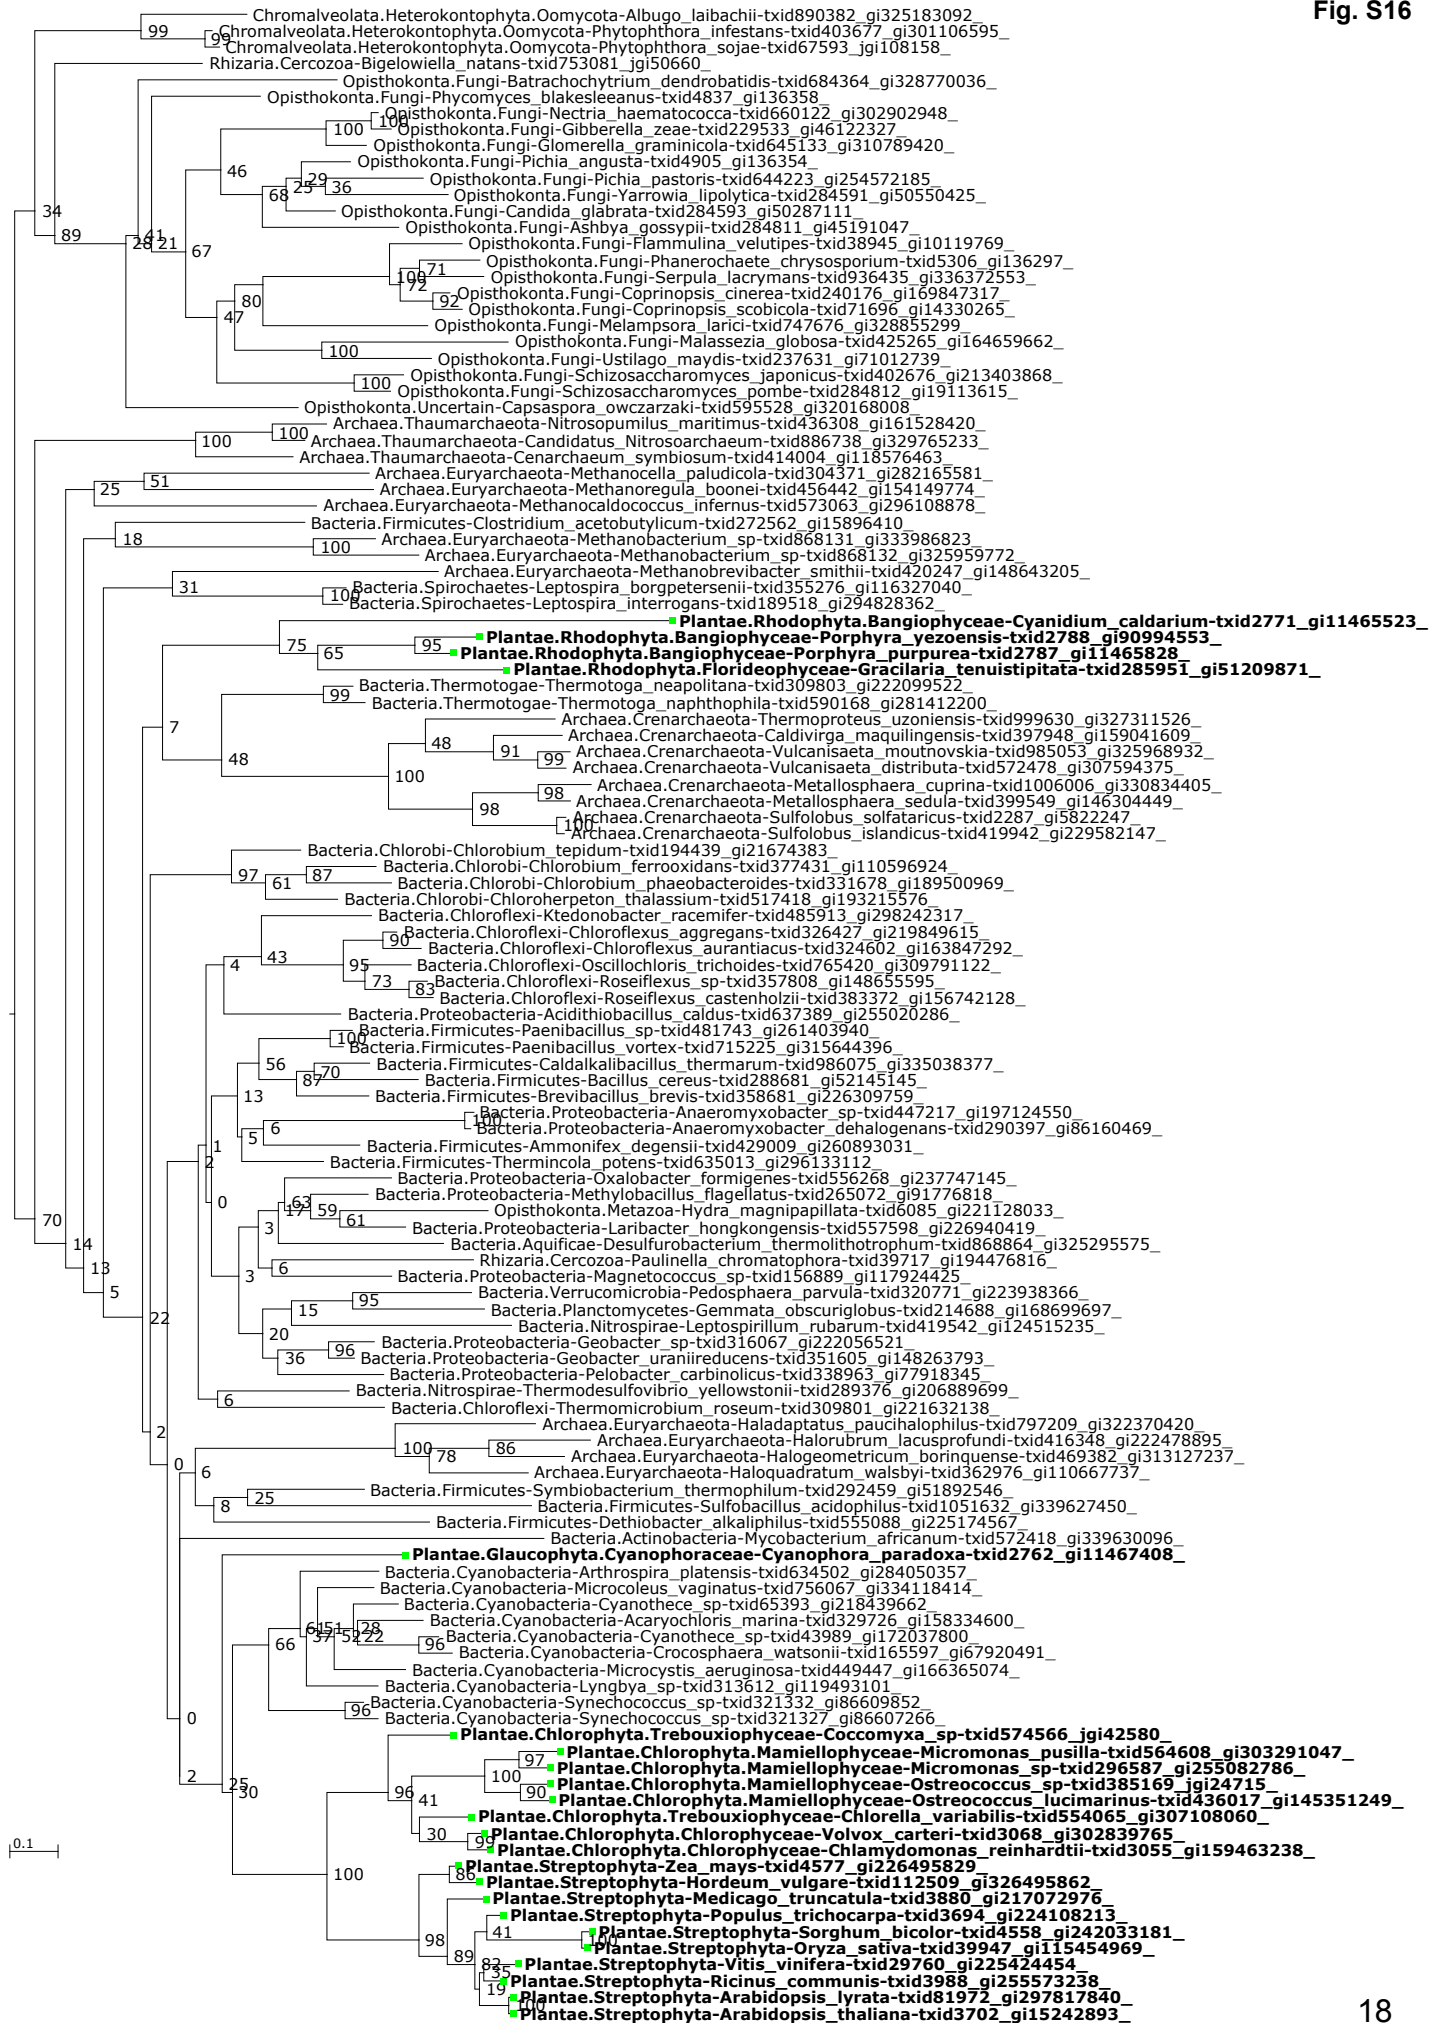

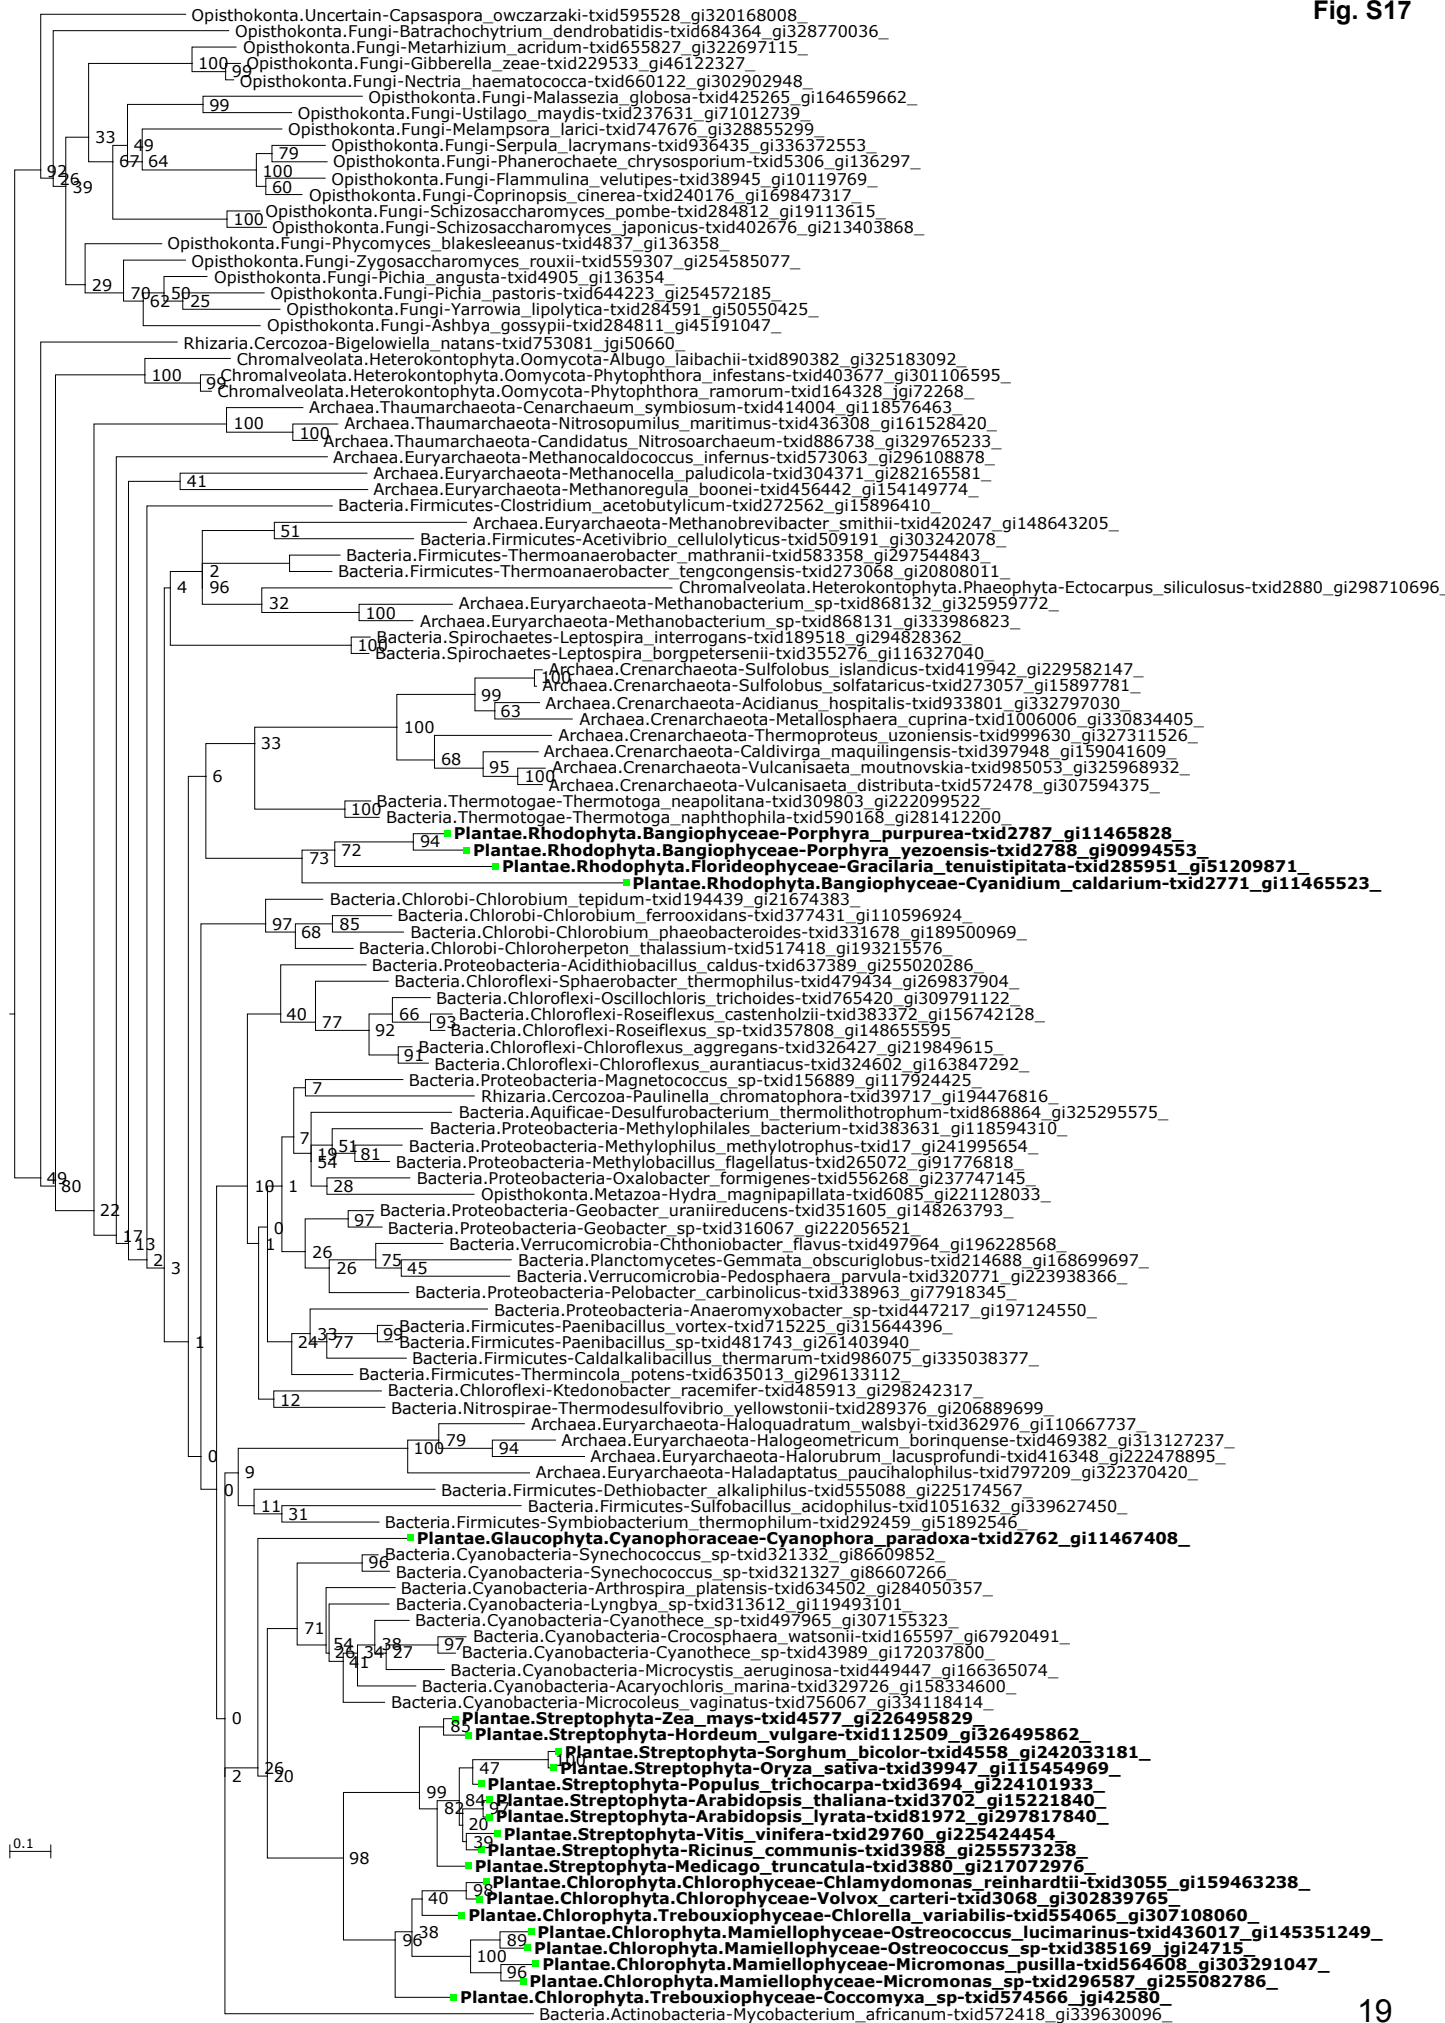

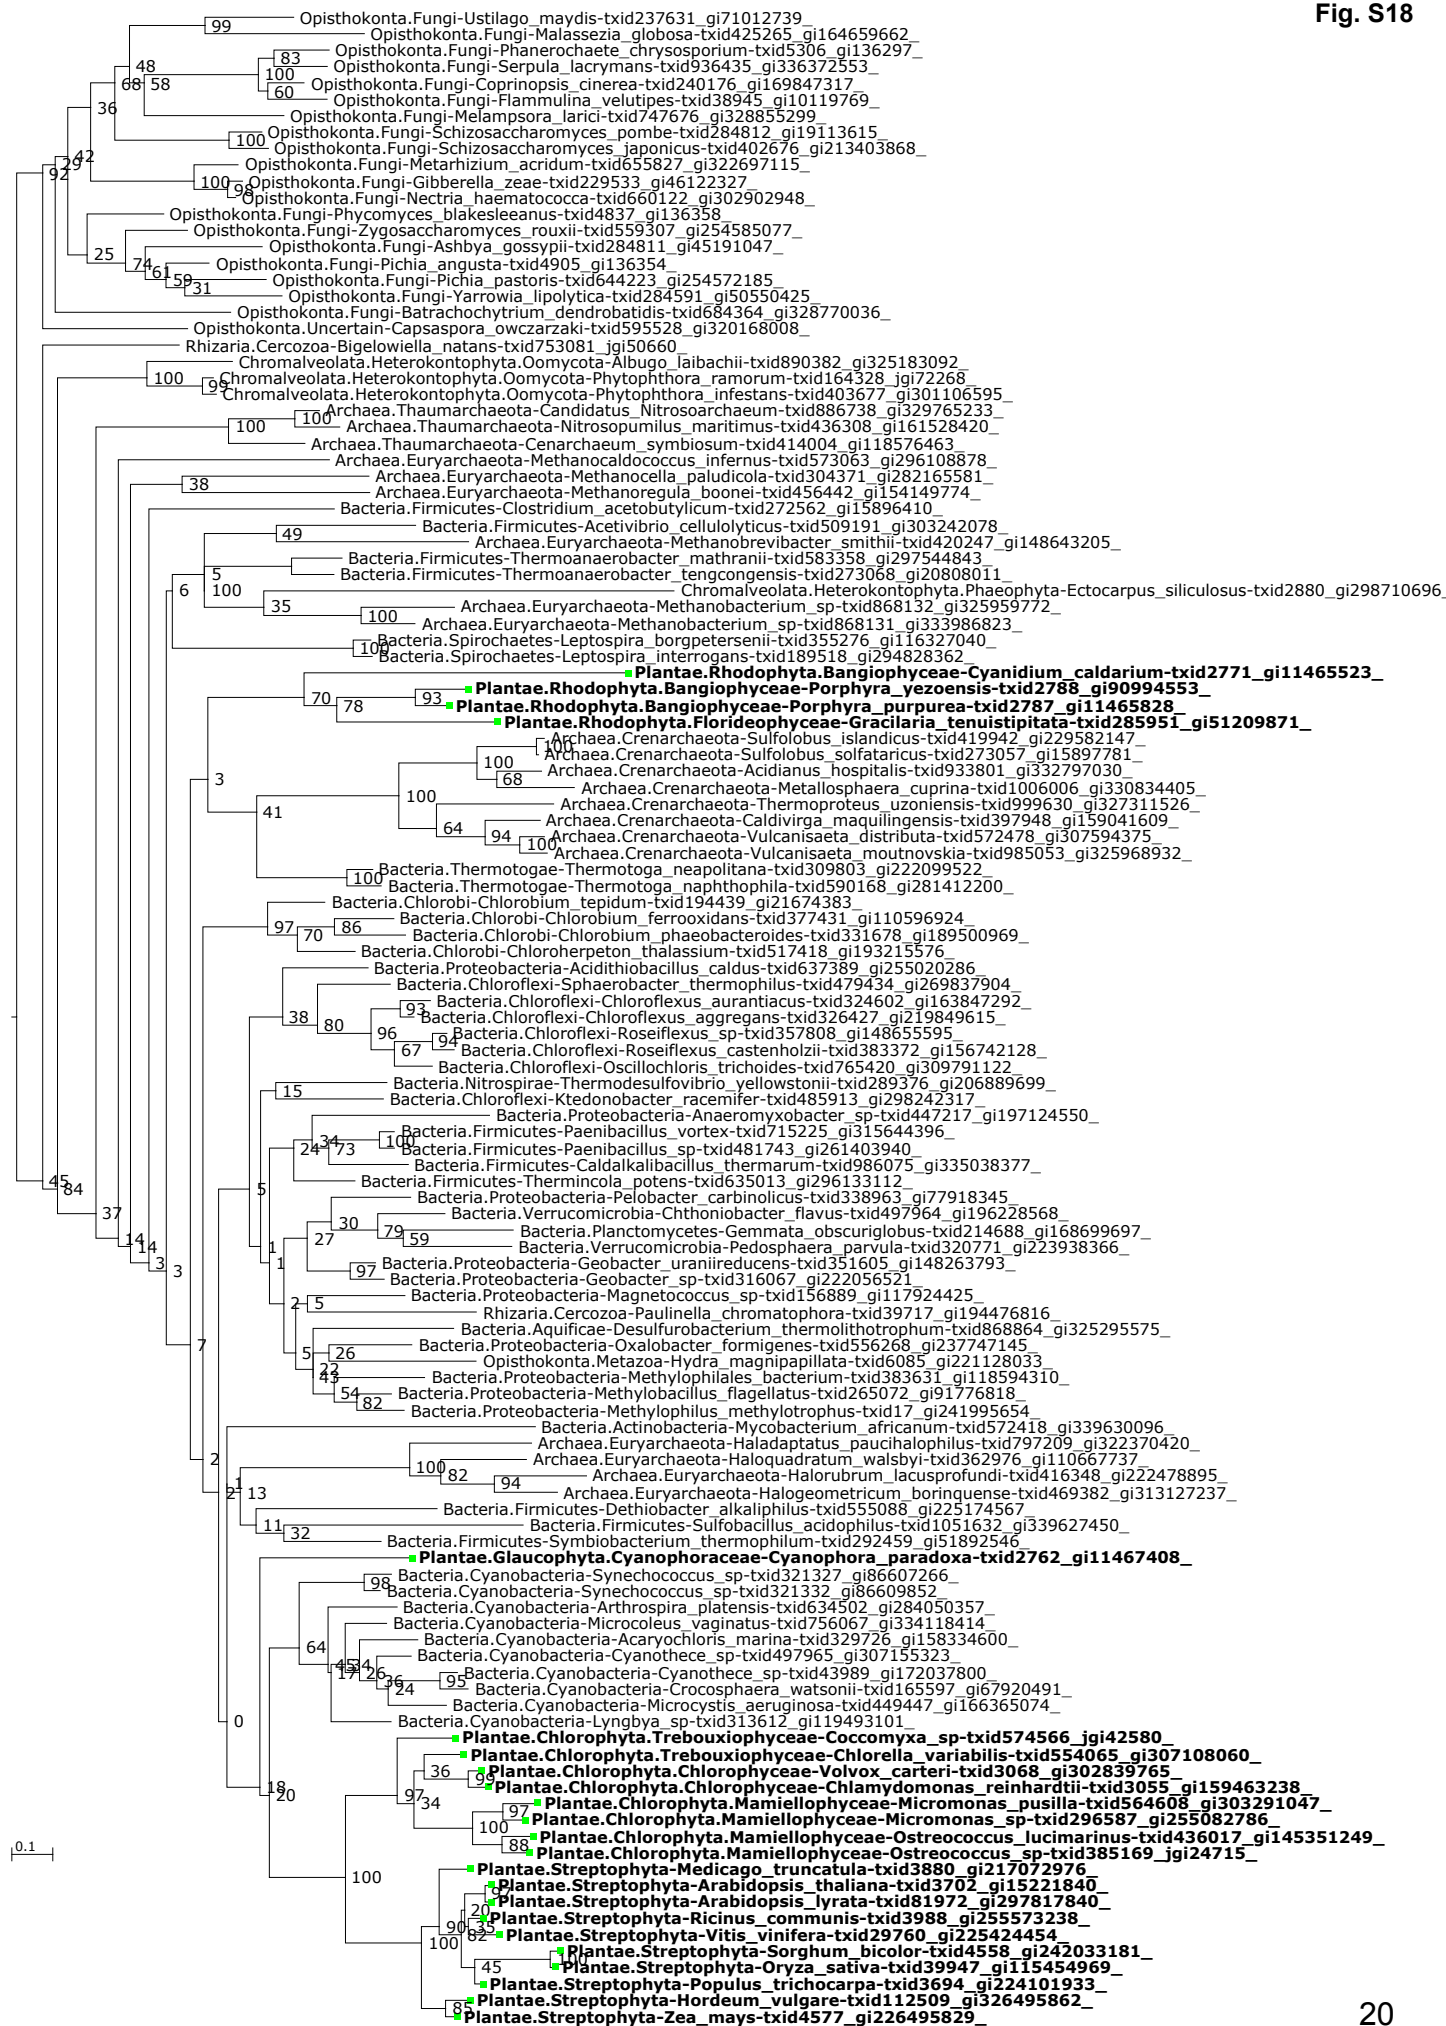

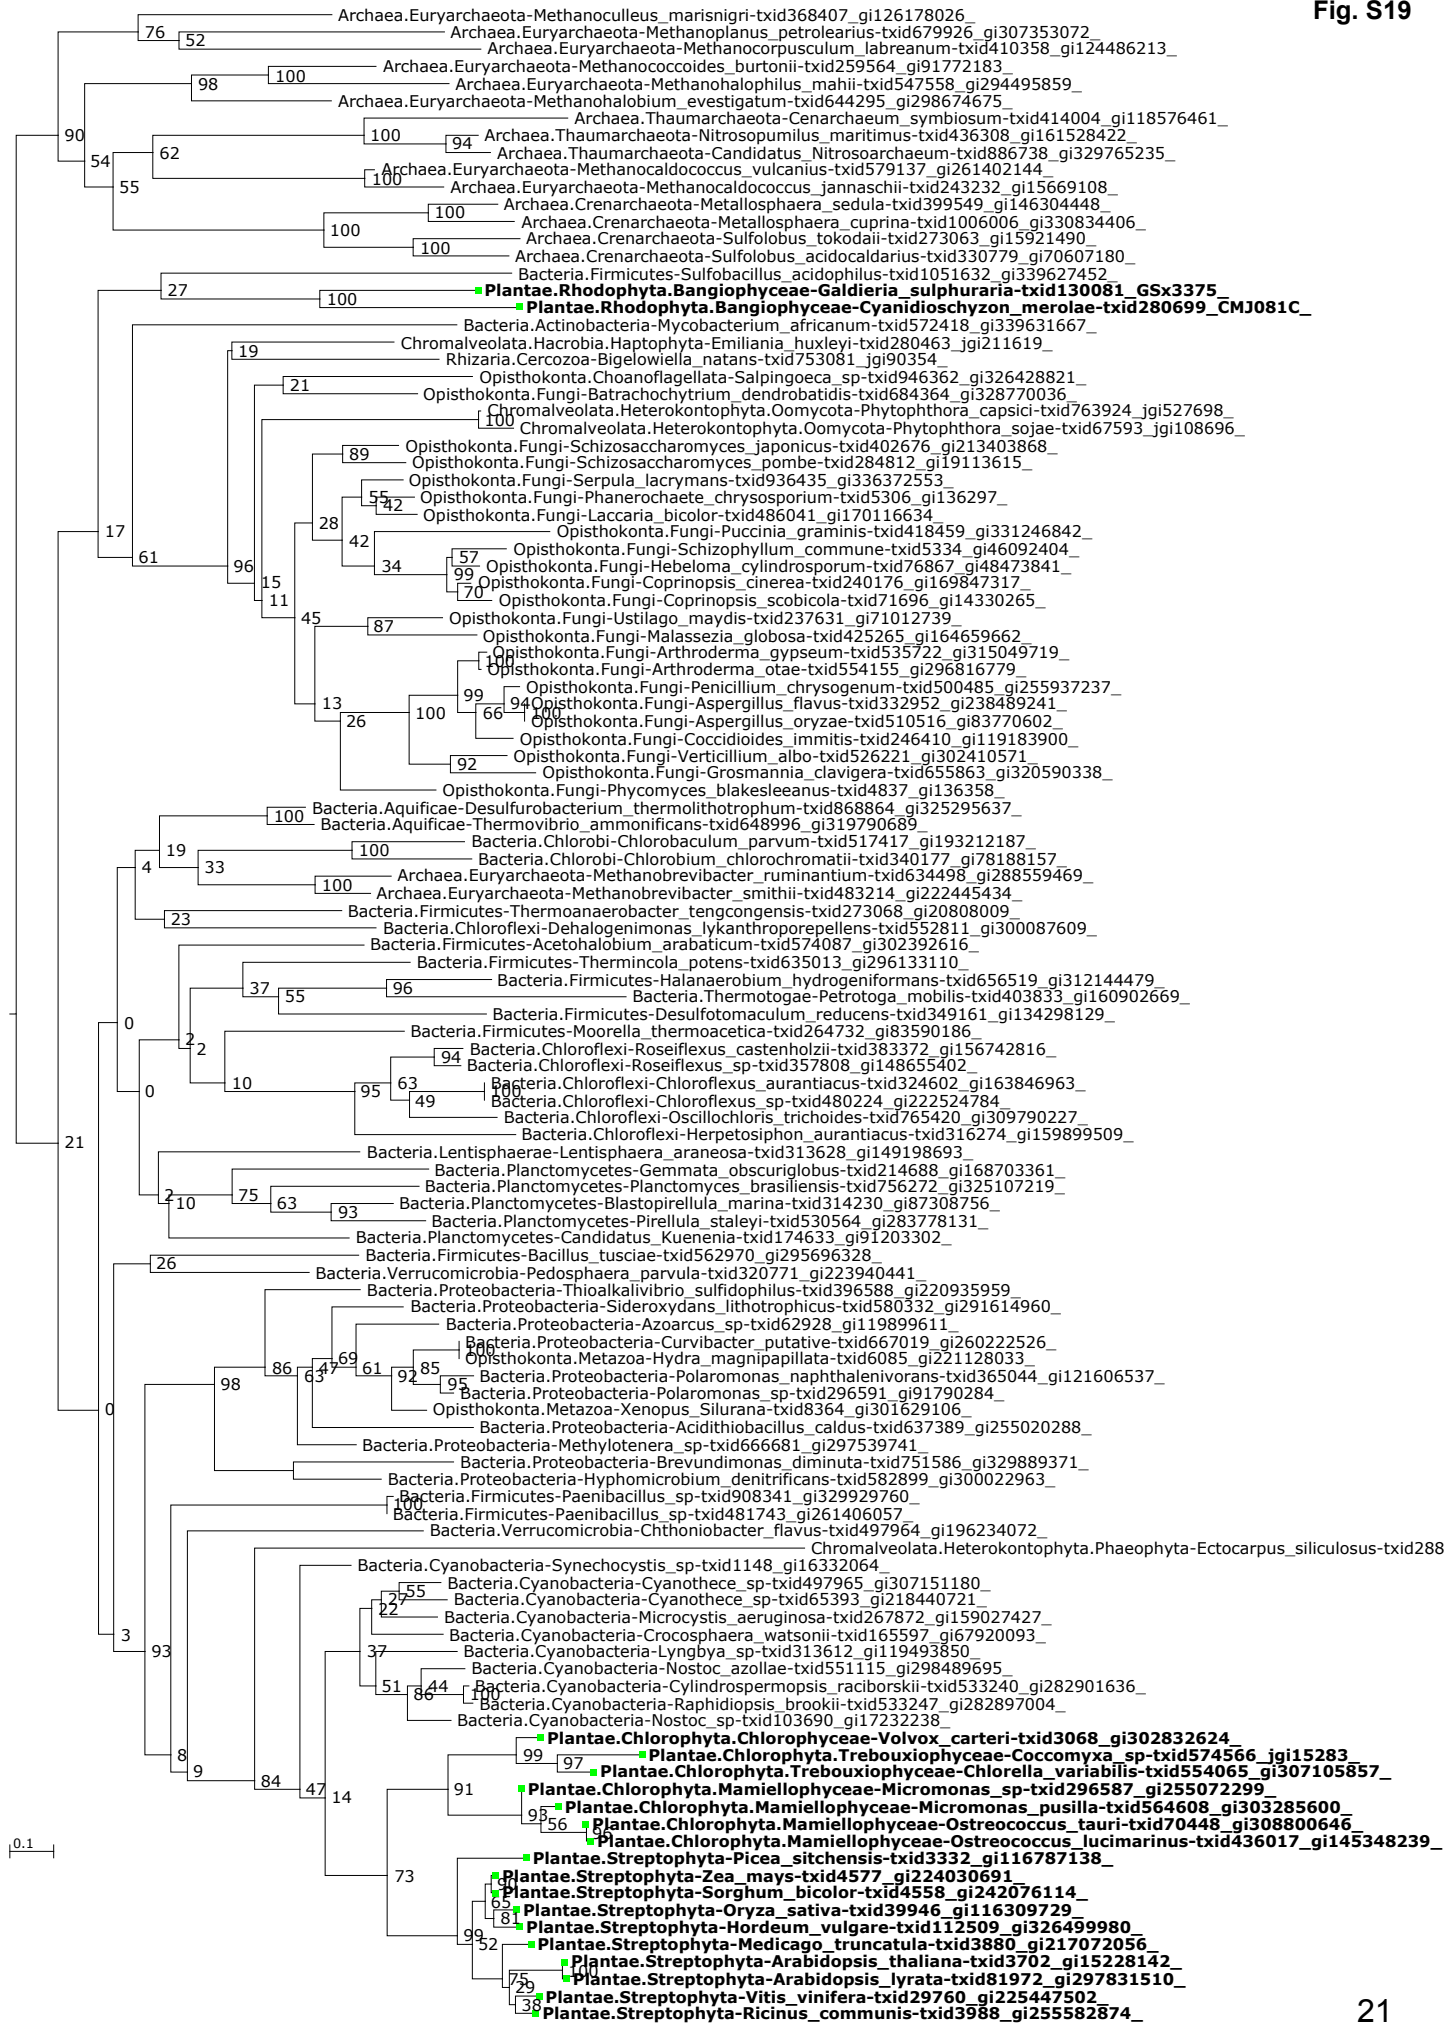

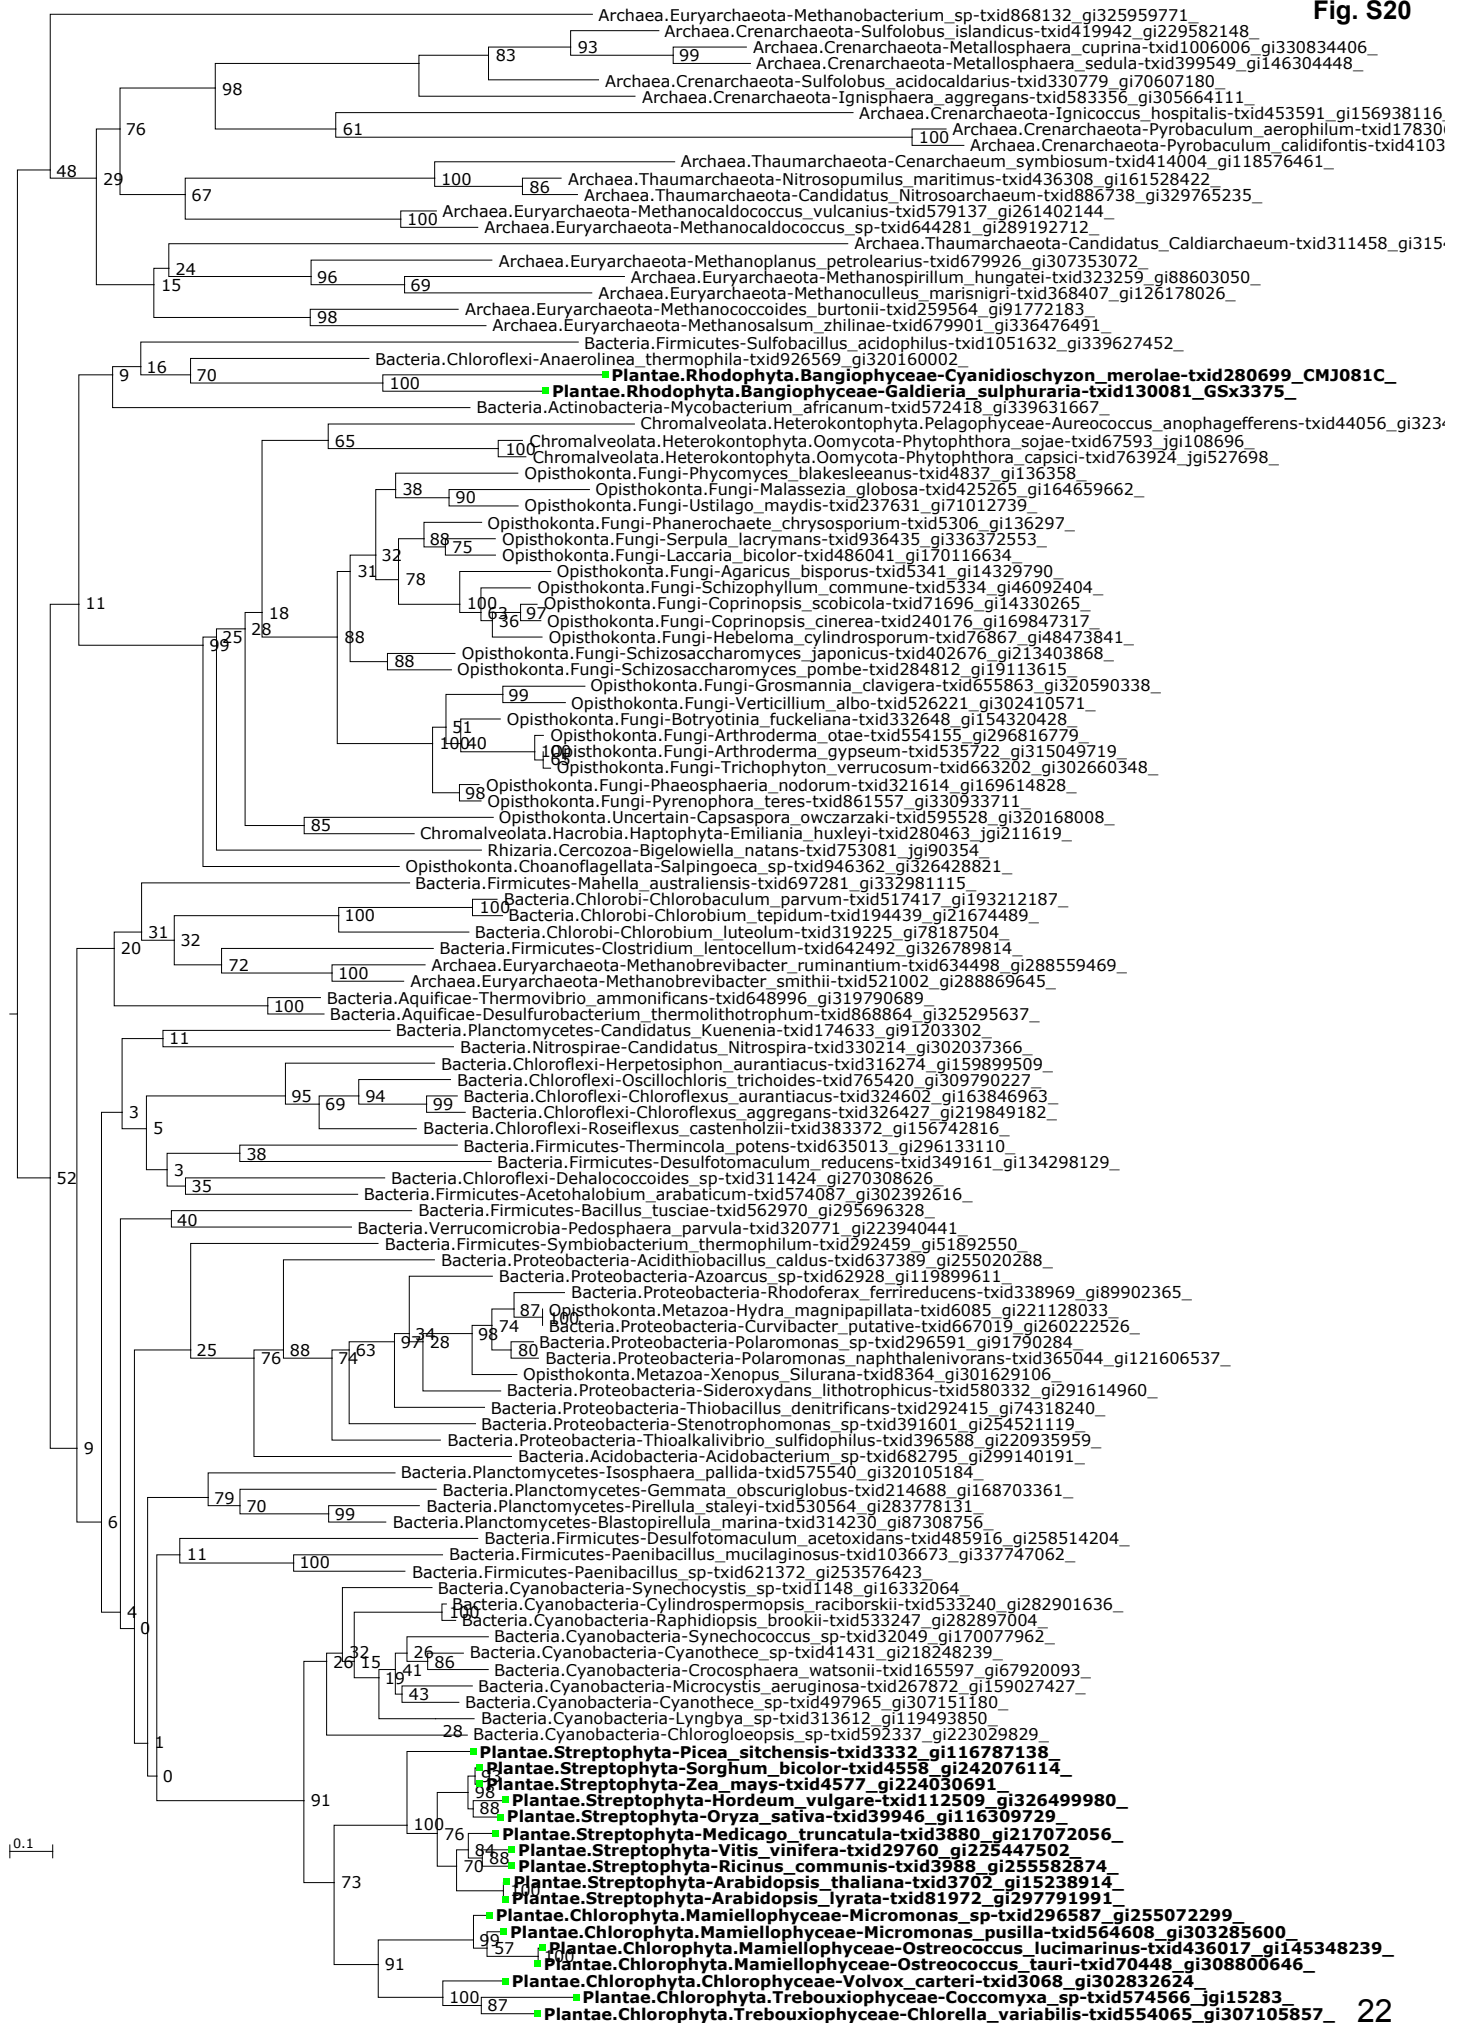

0.1

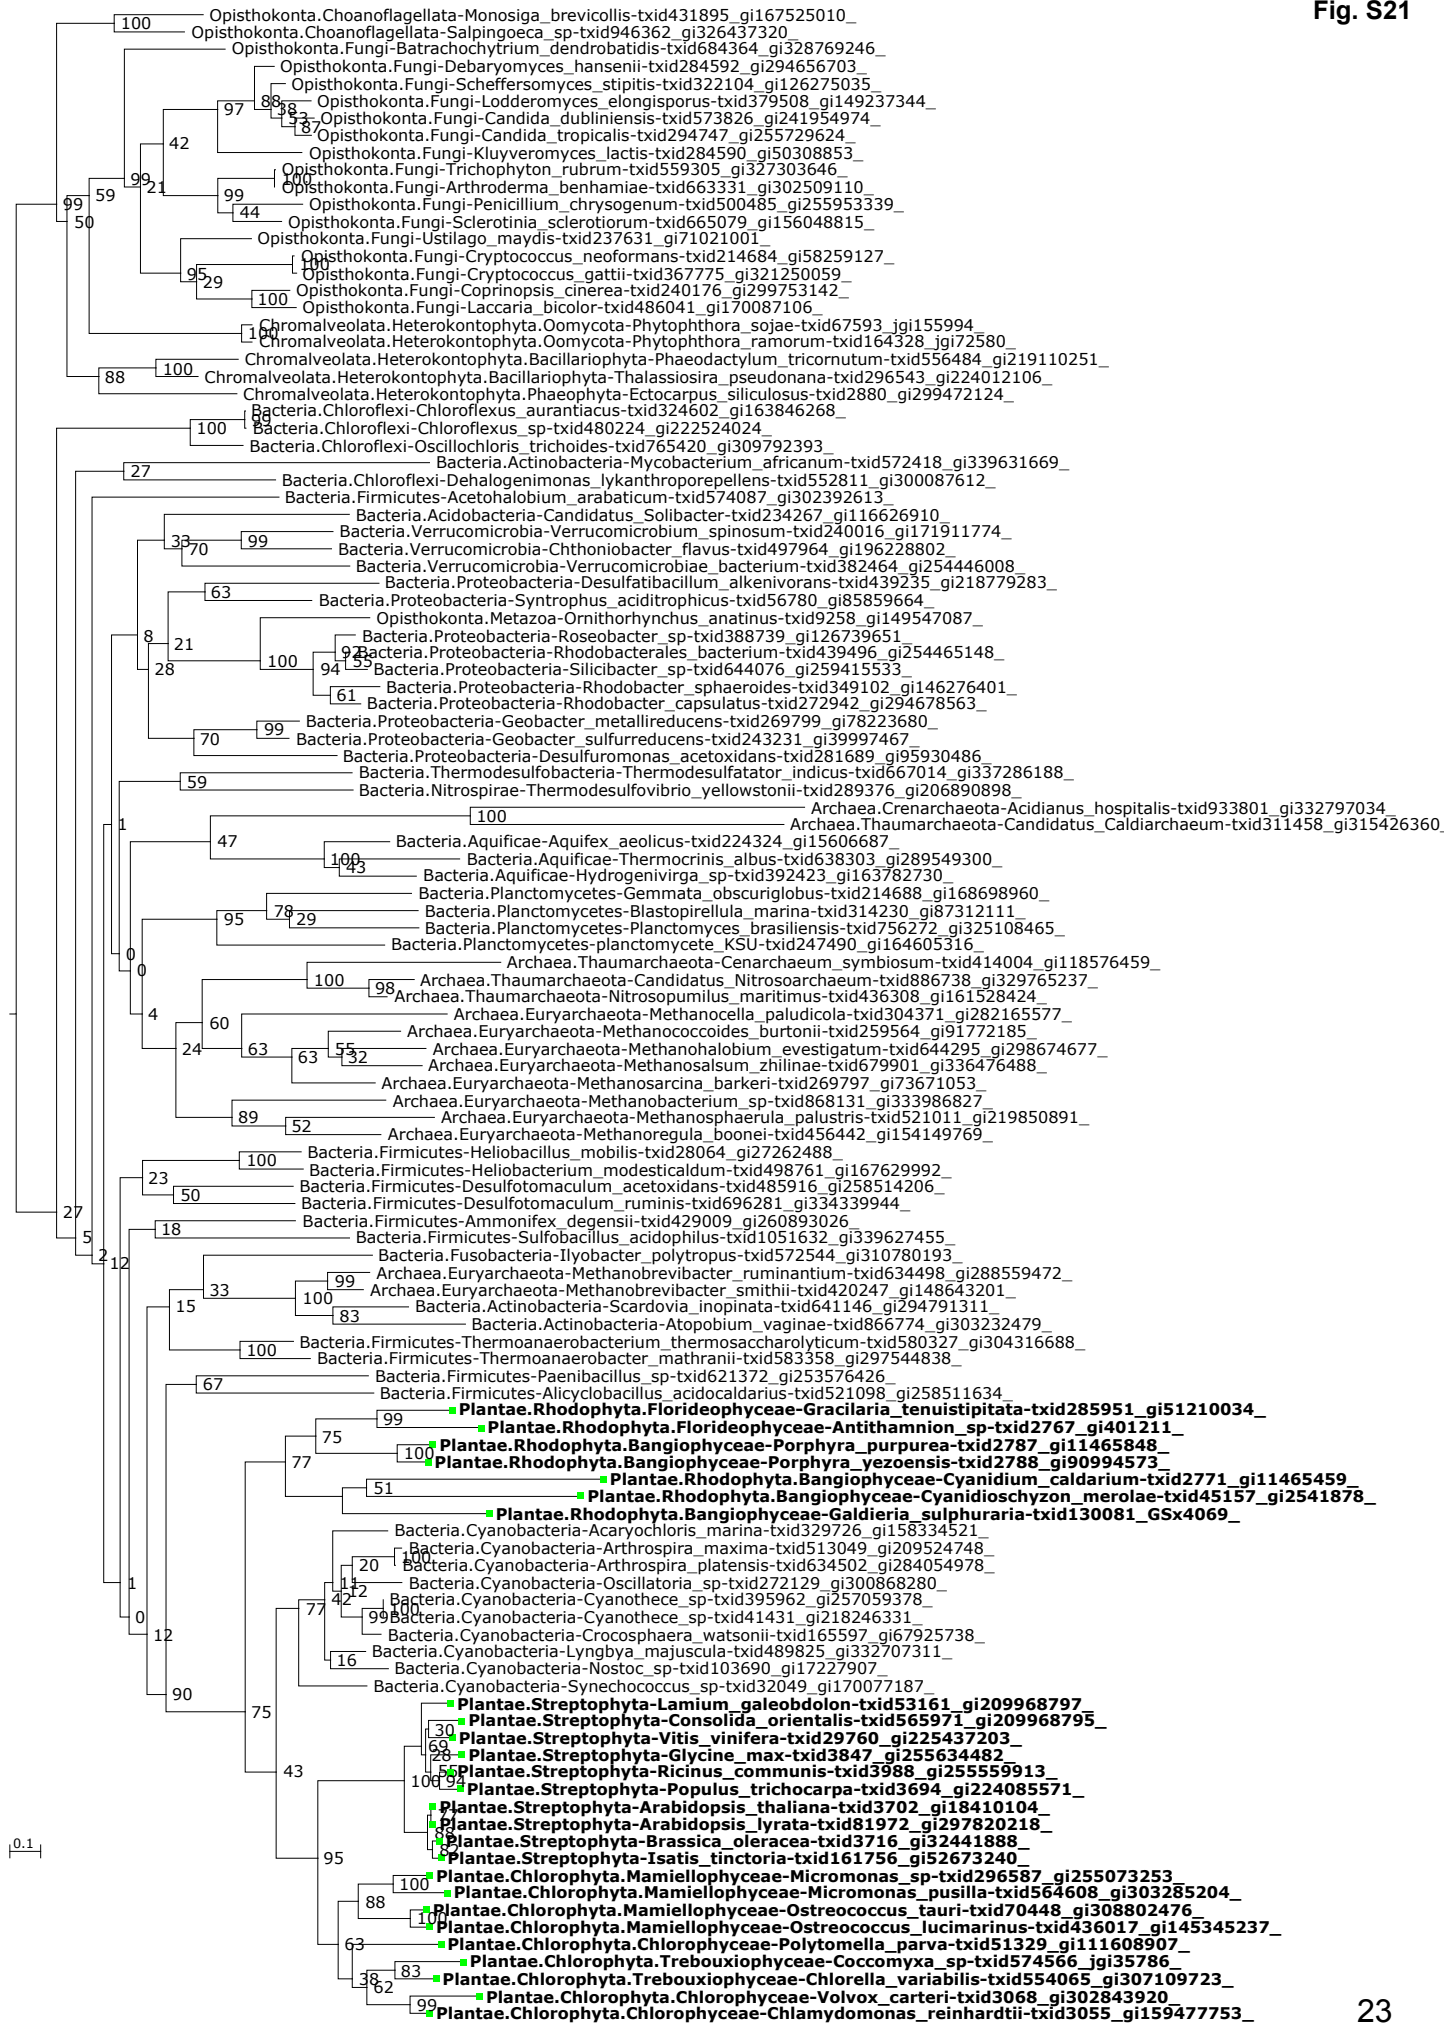

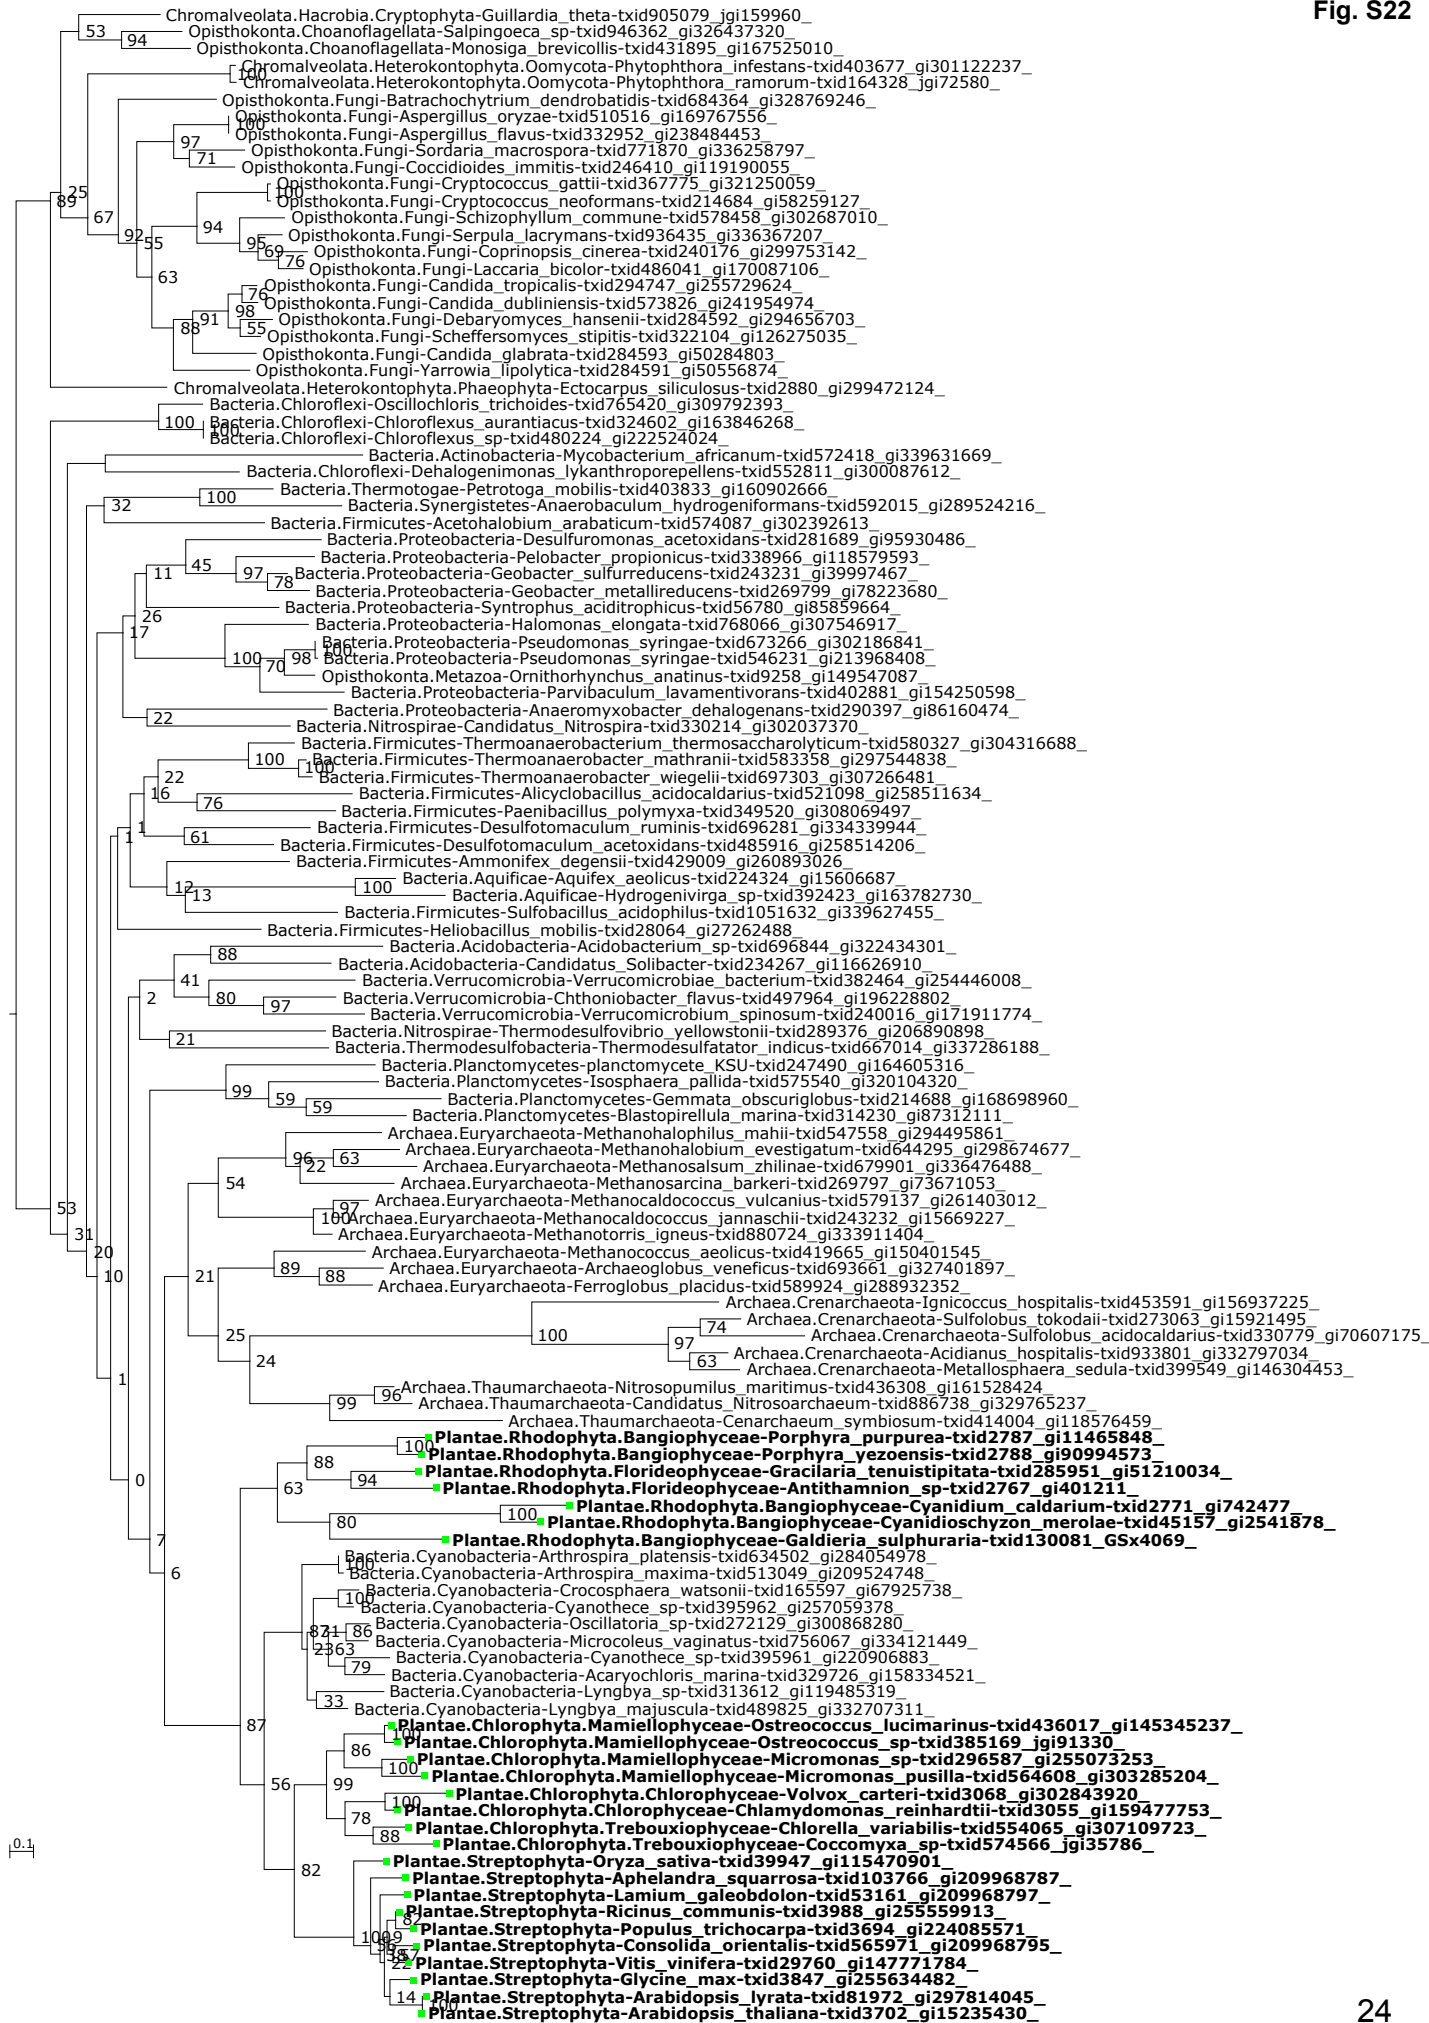



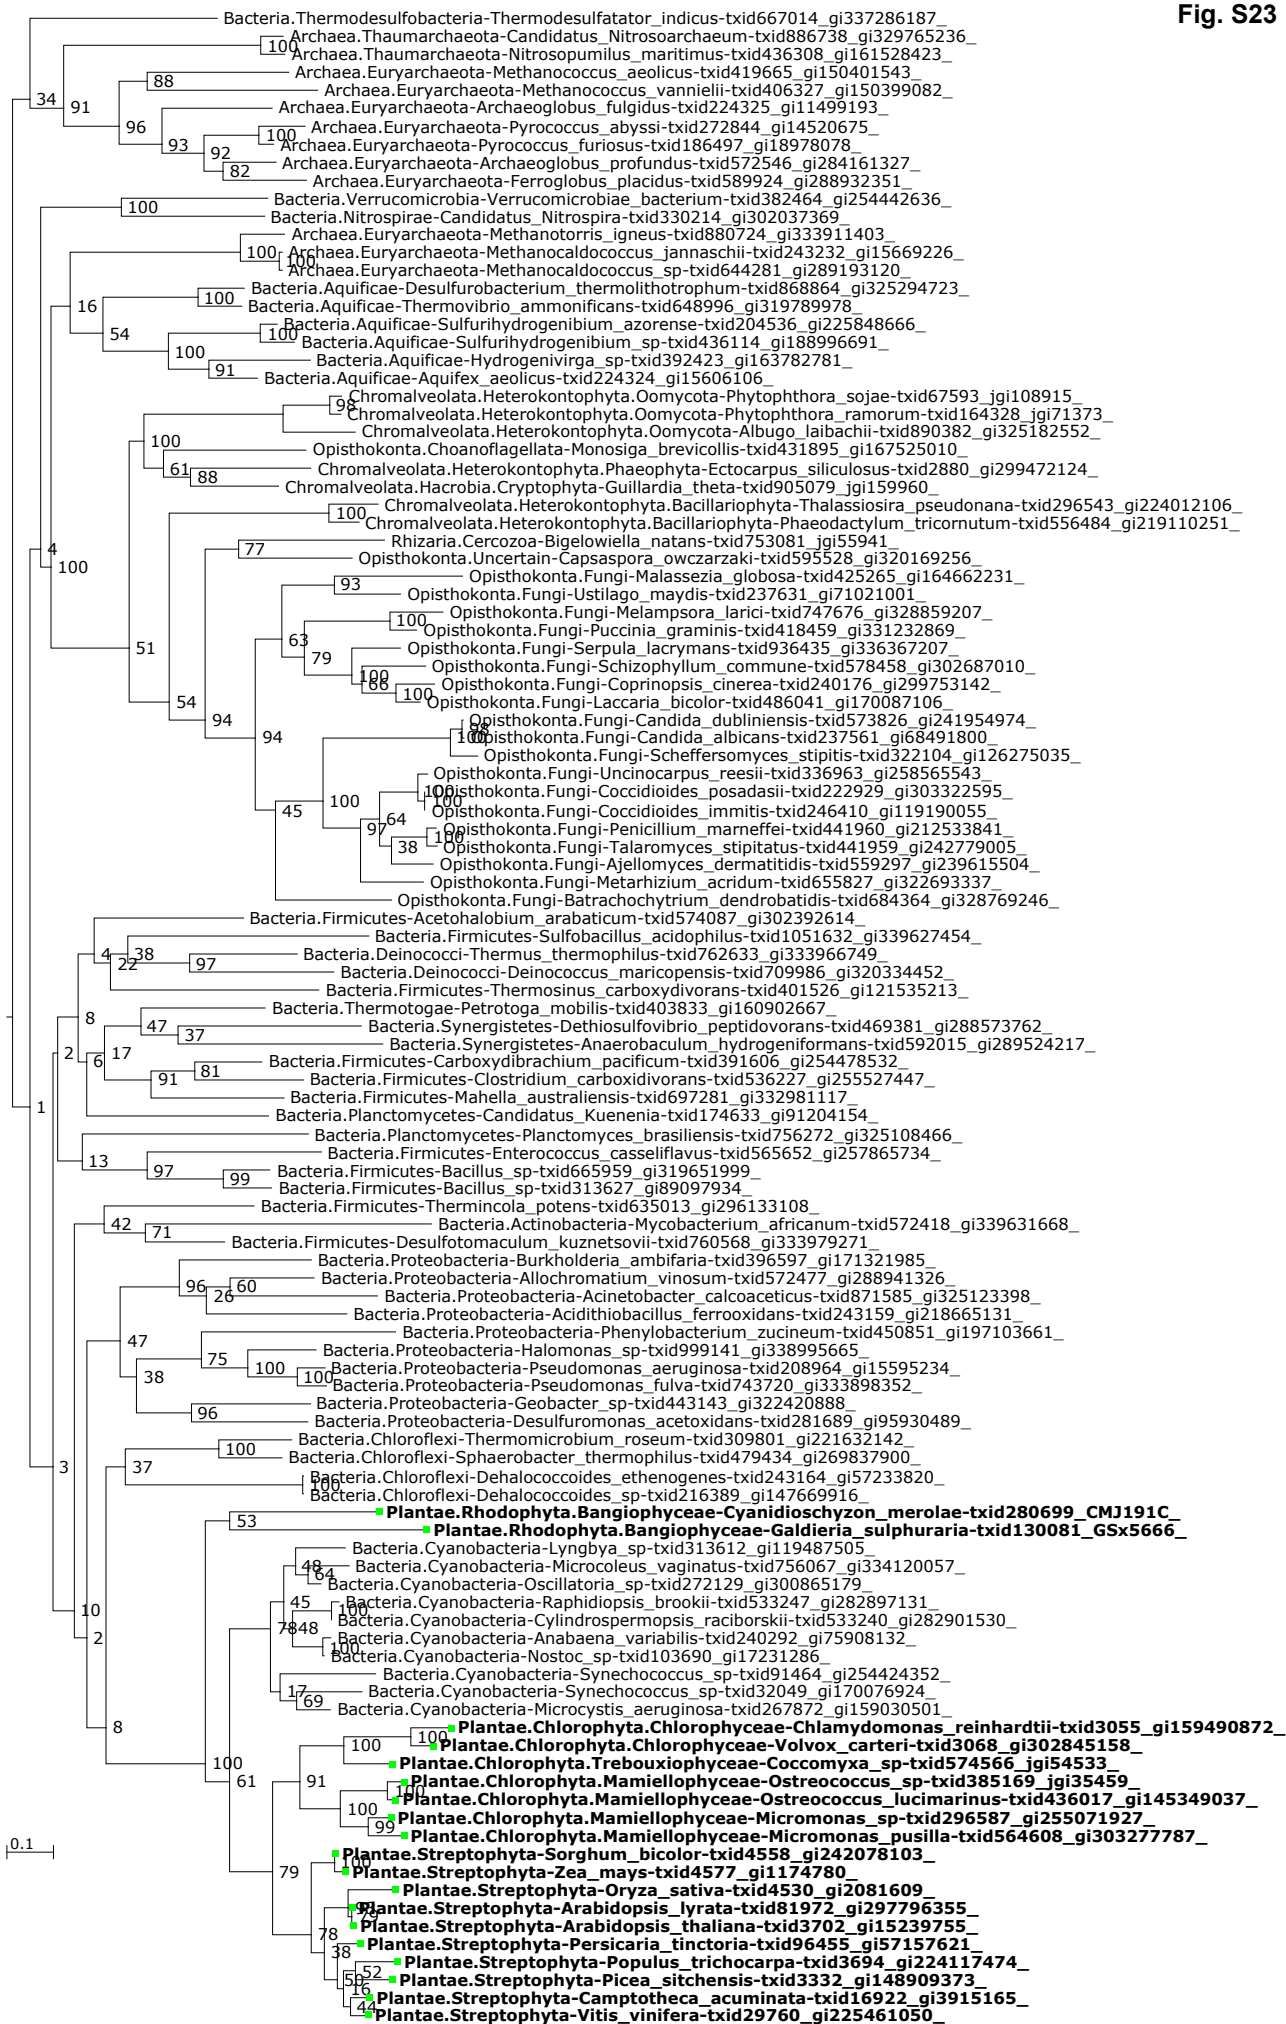

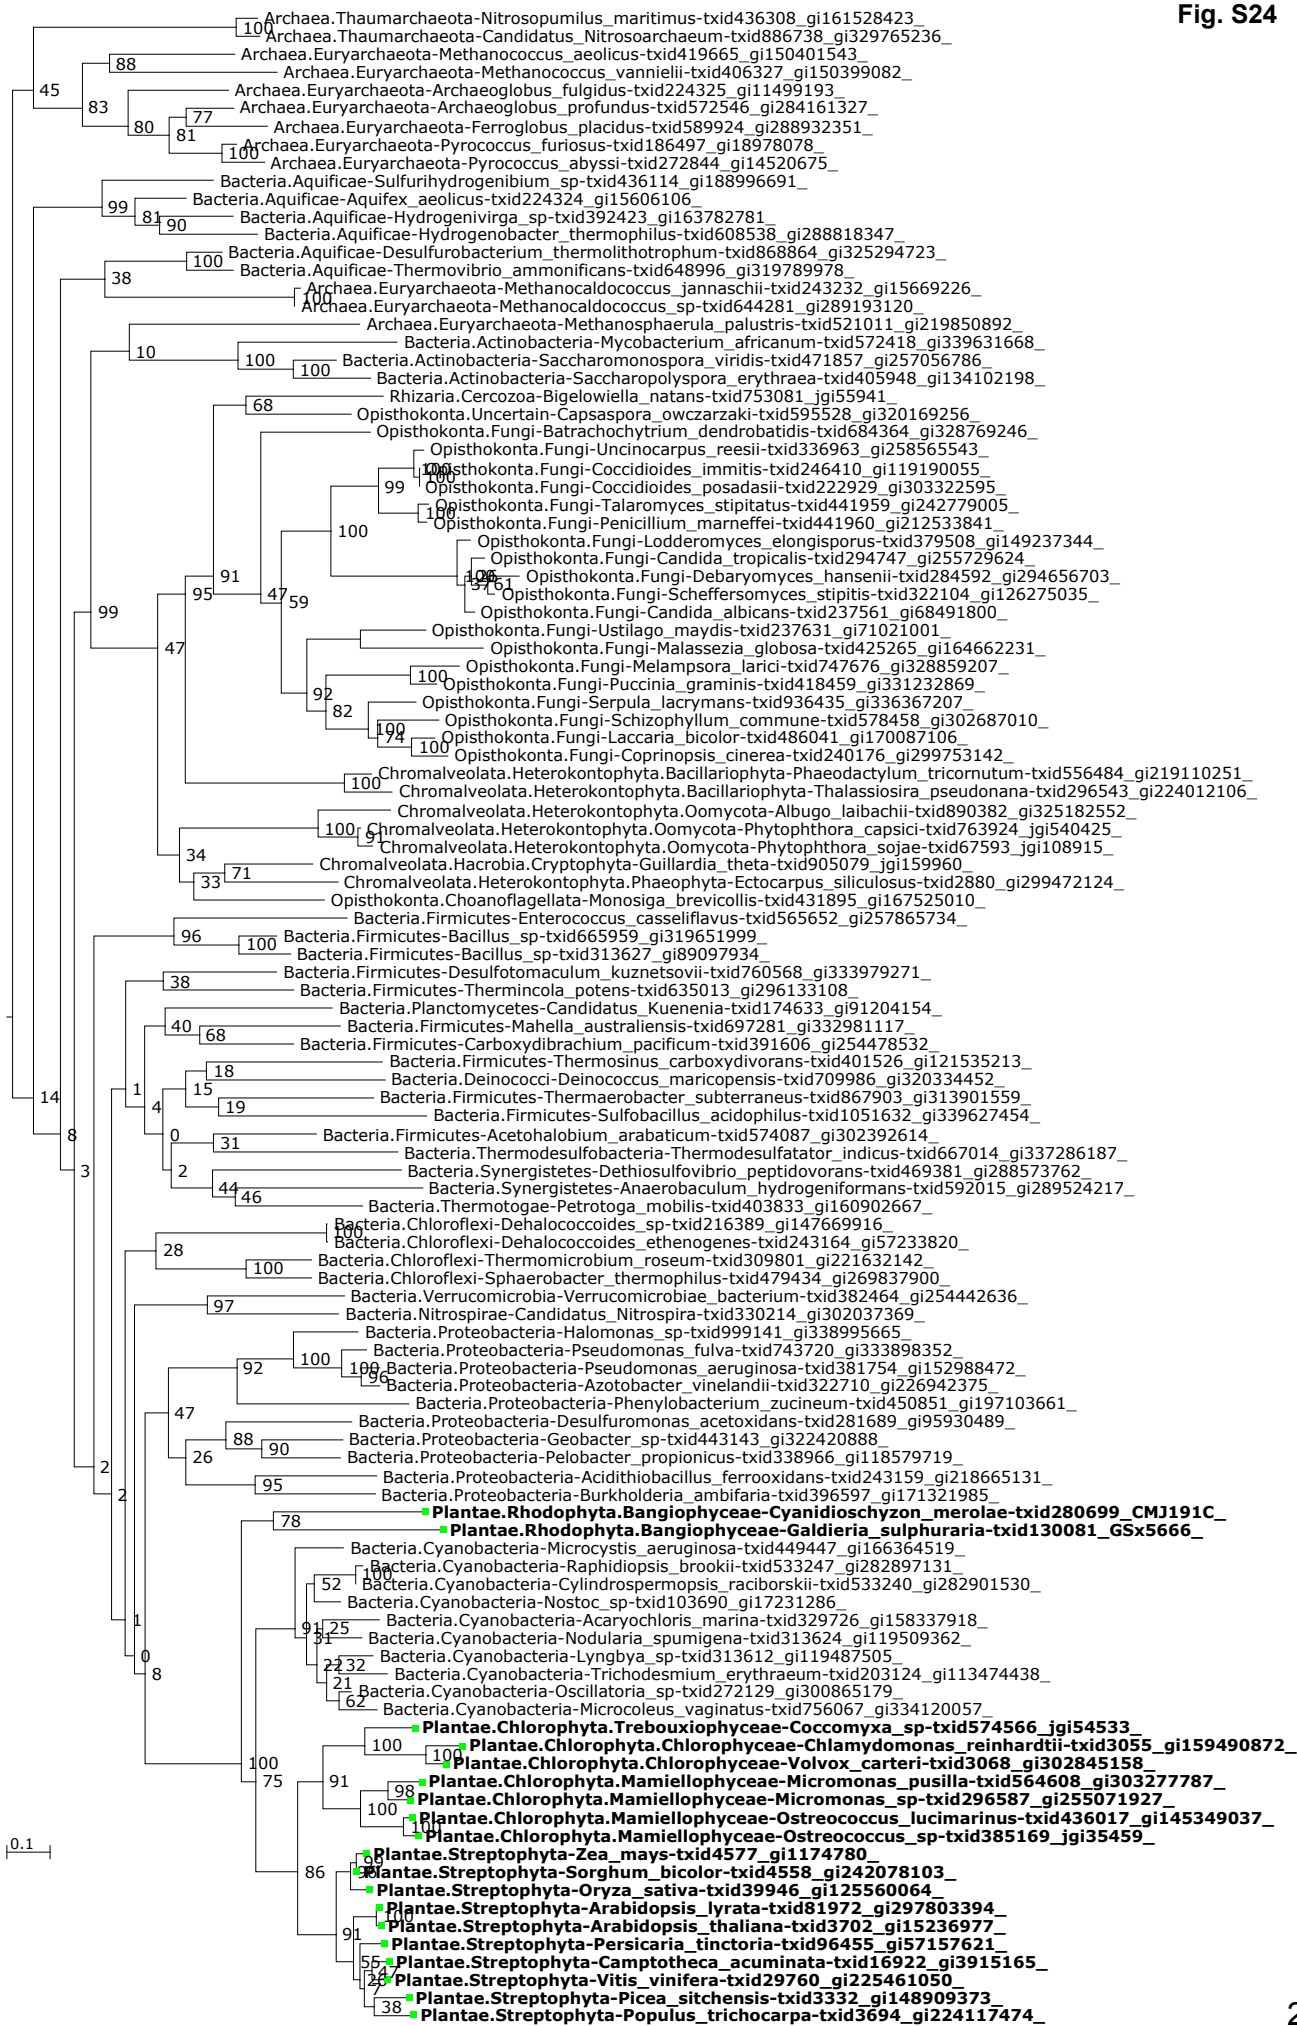

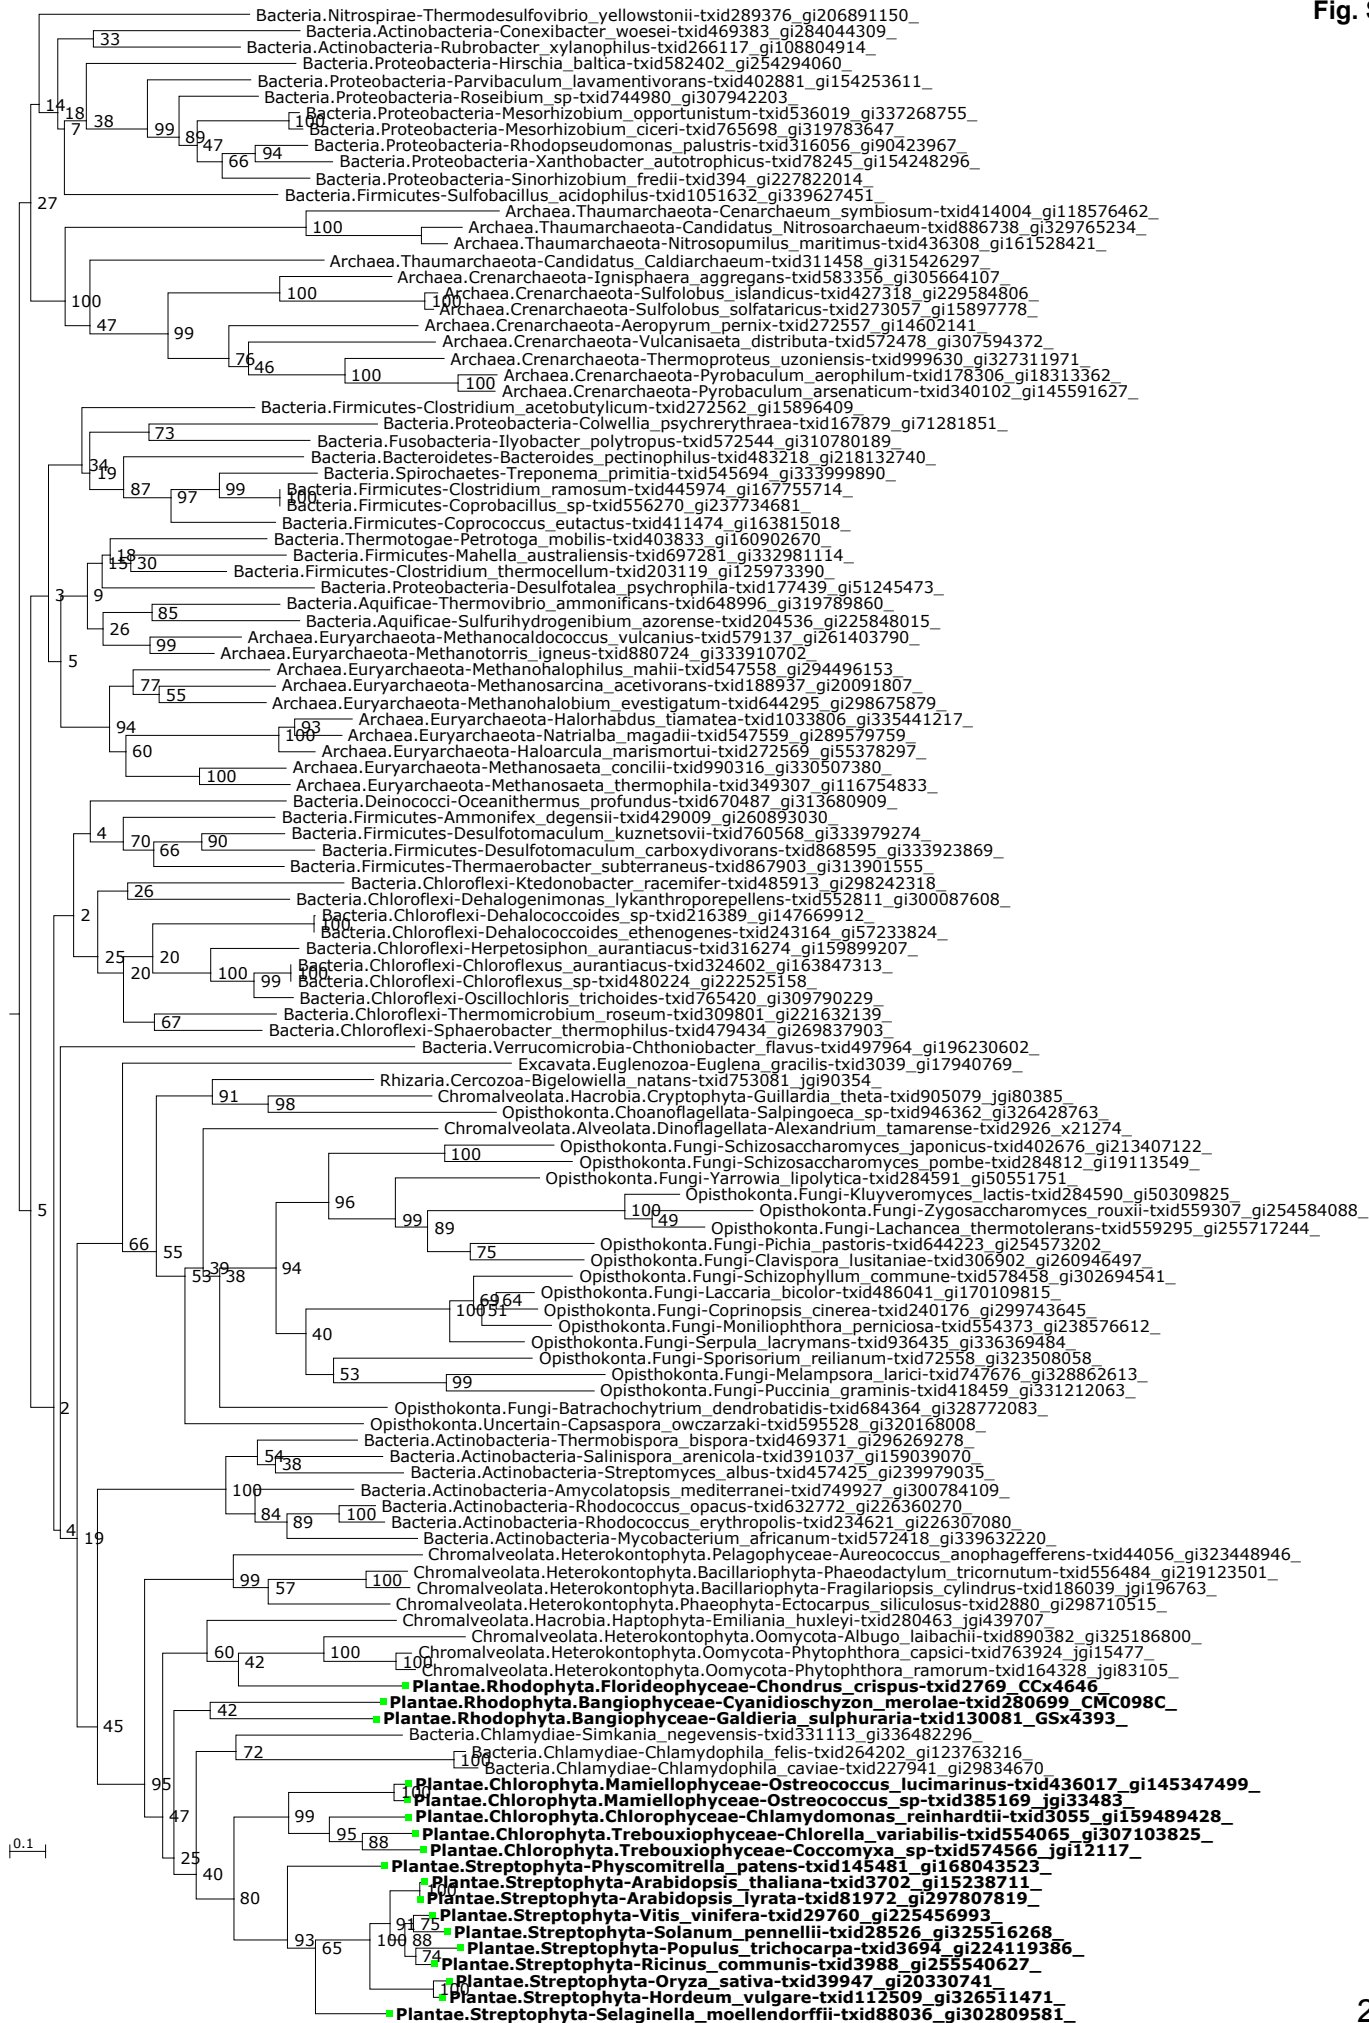

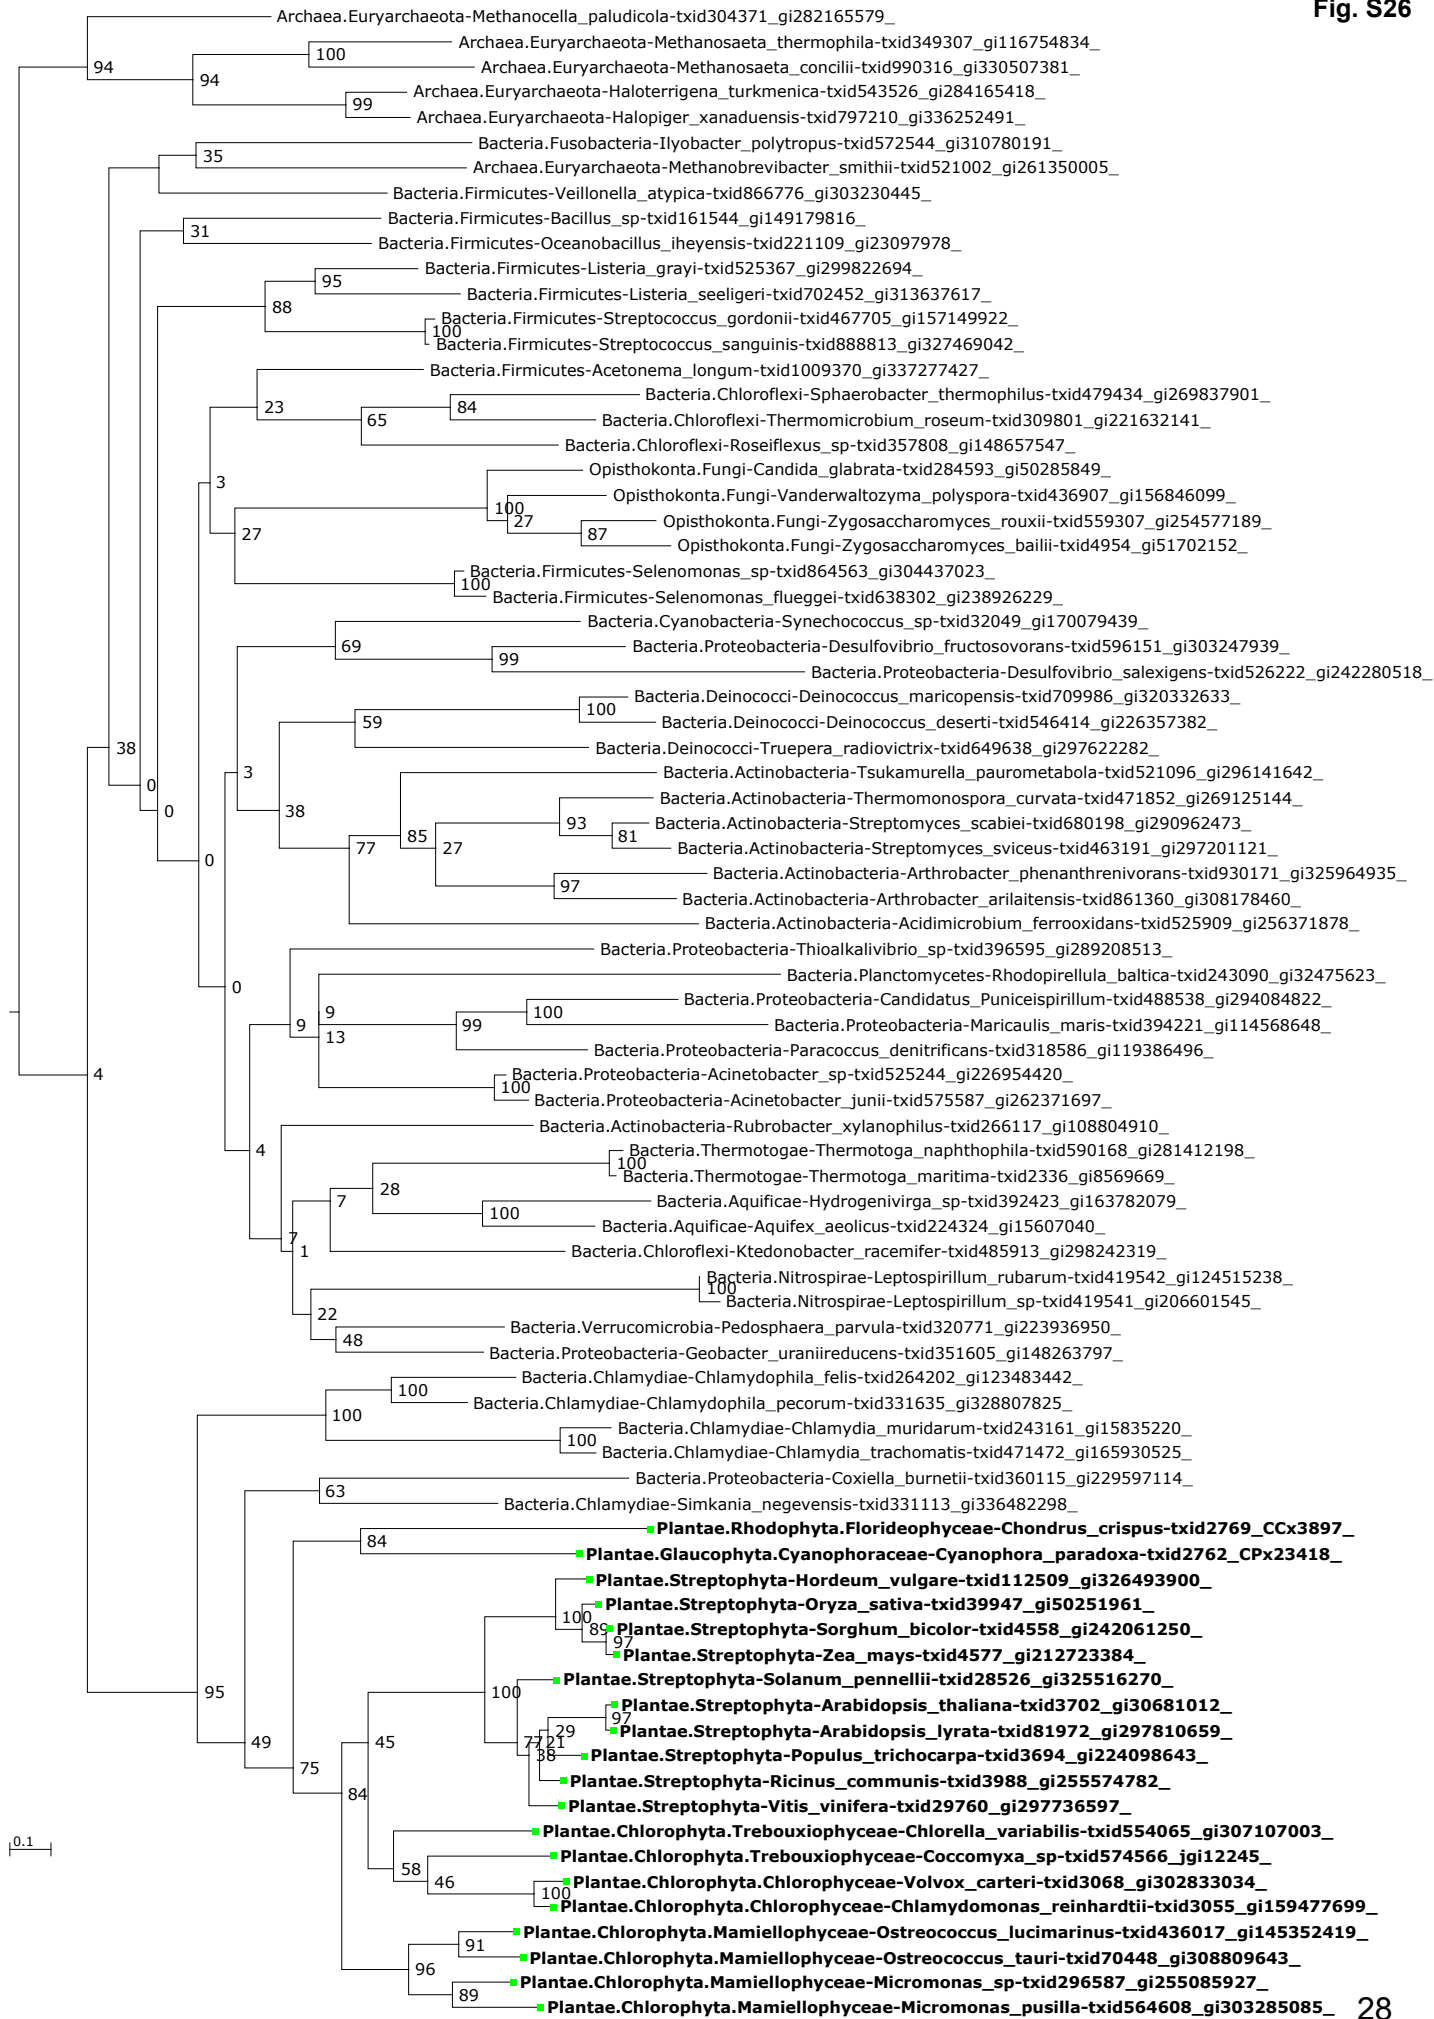

0.1

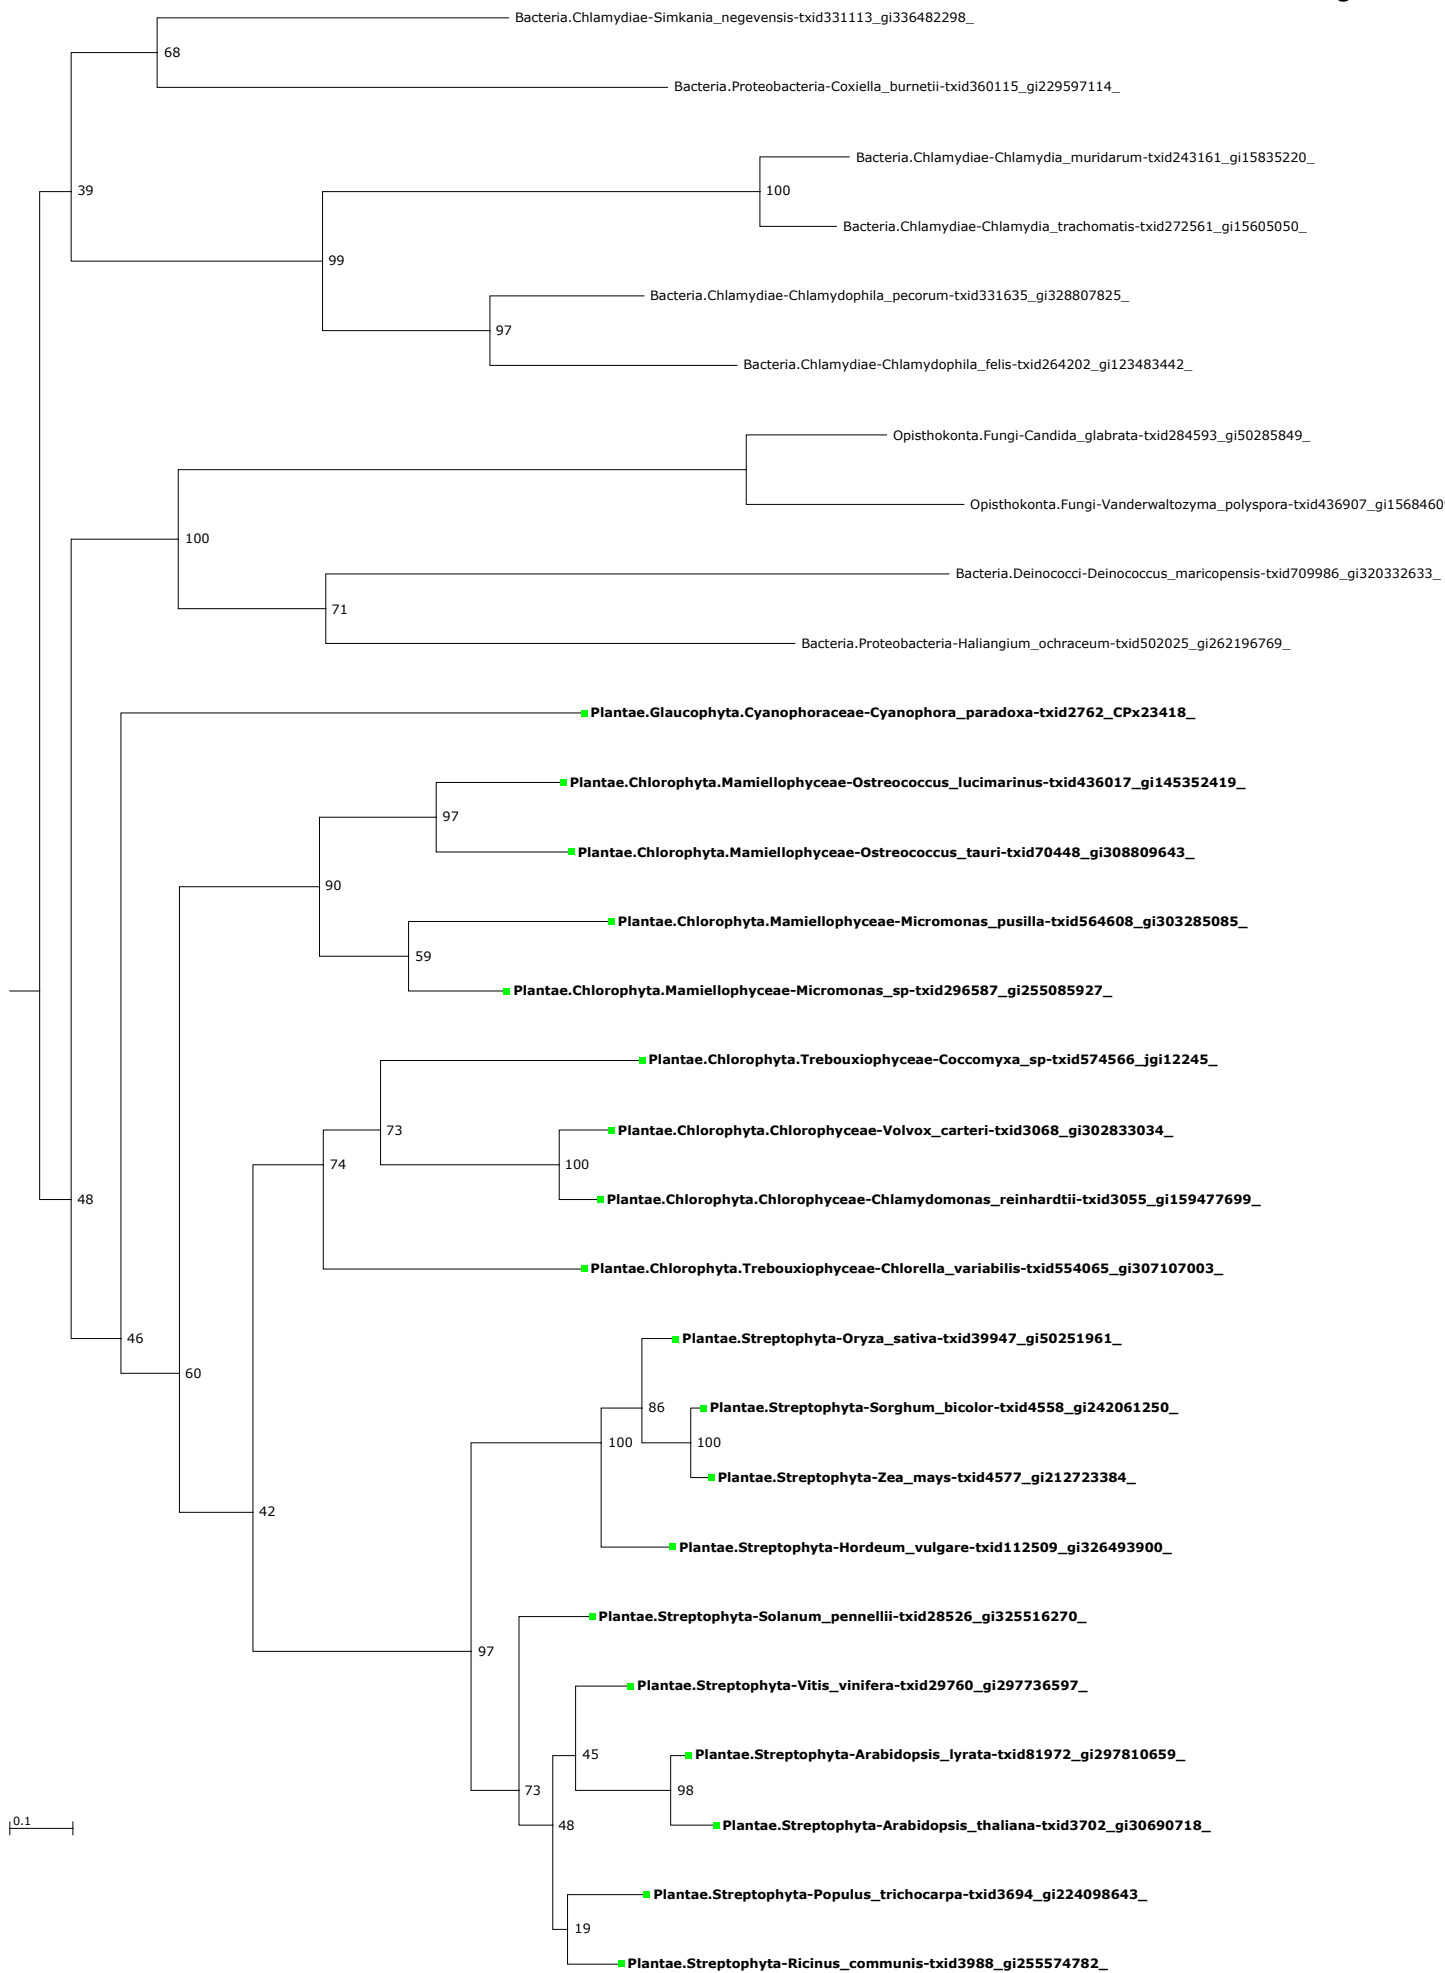

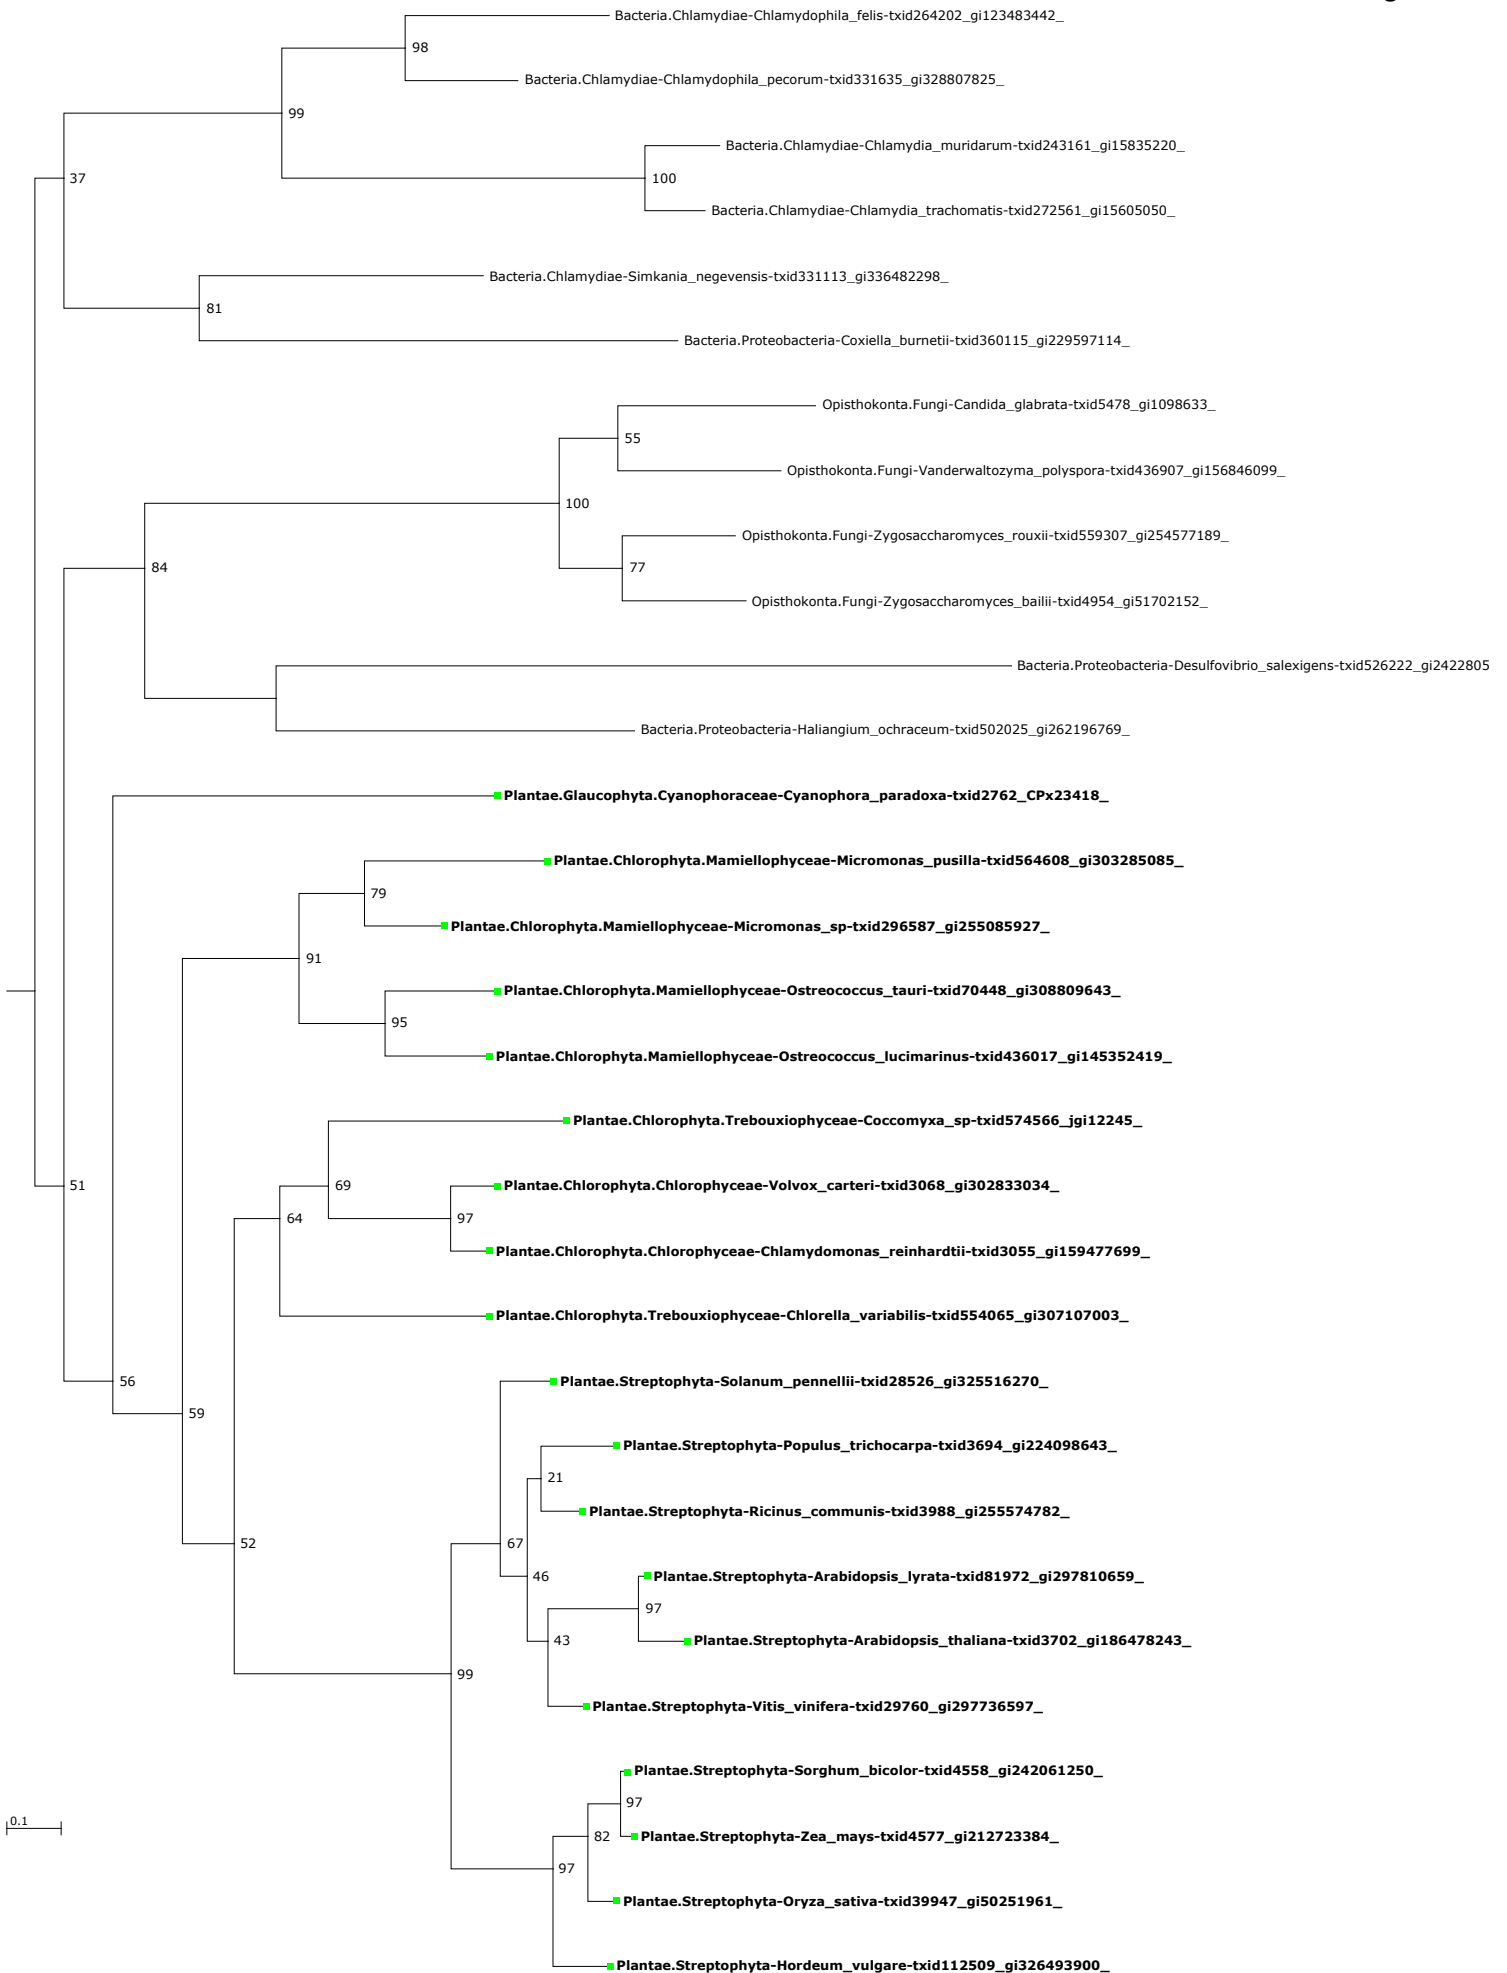

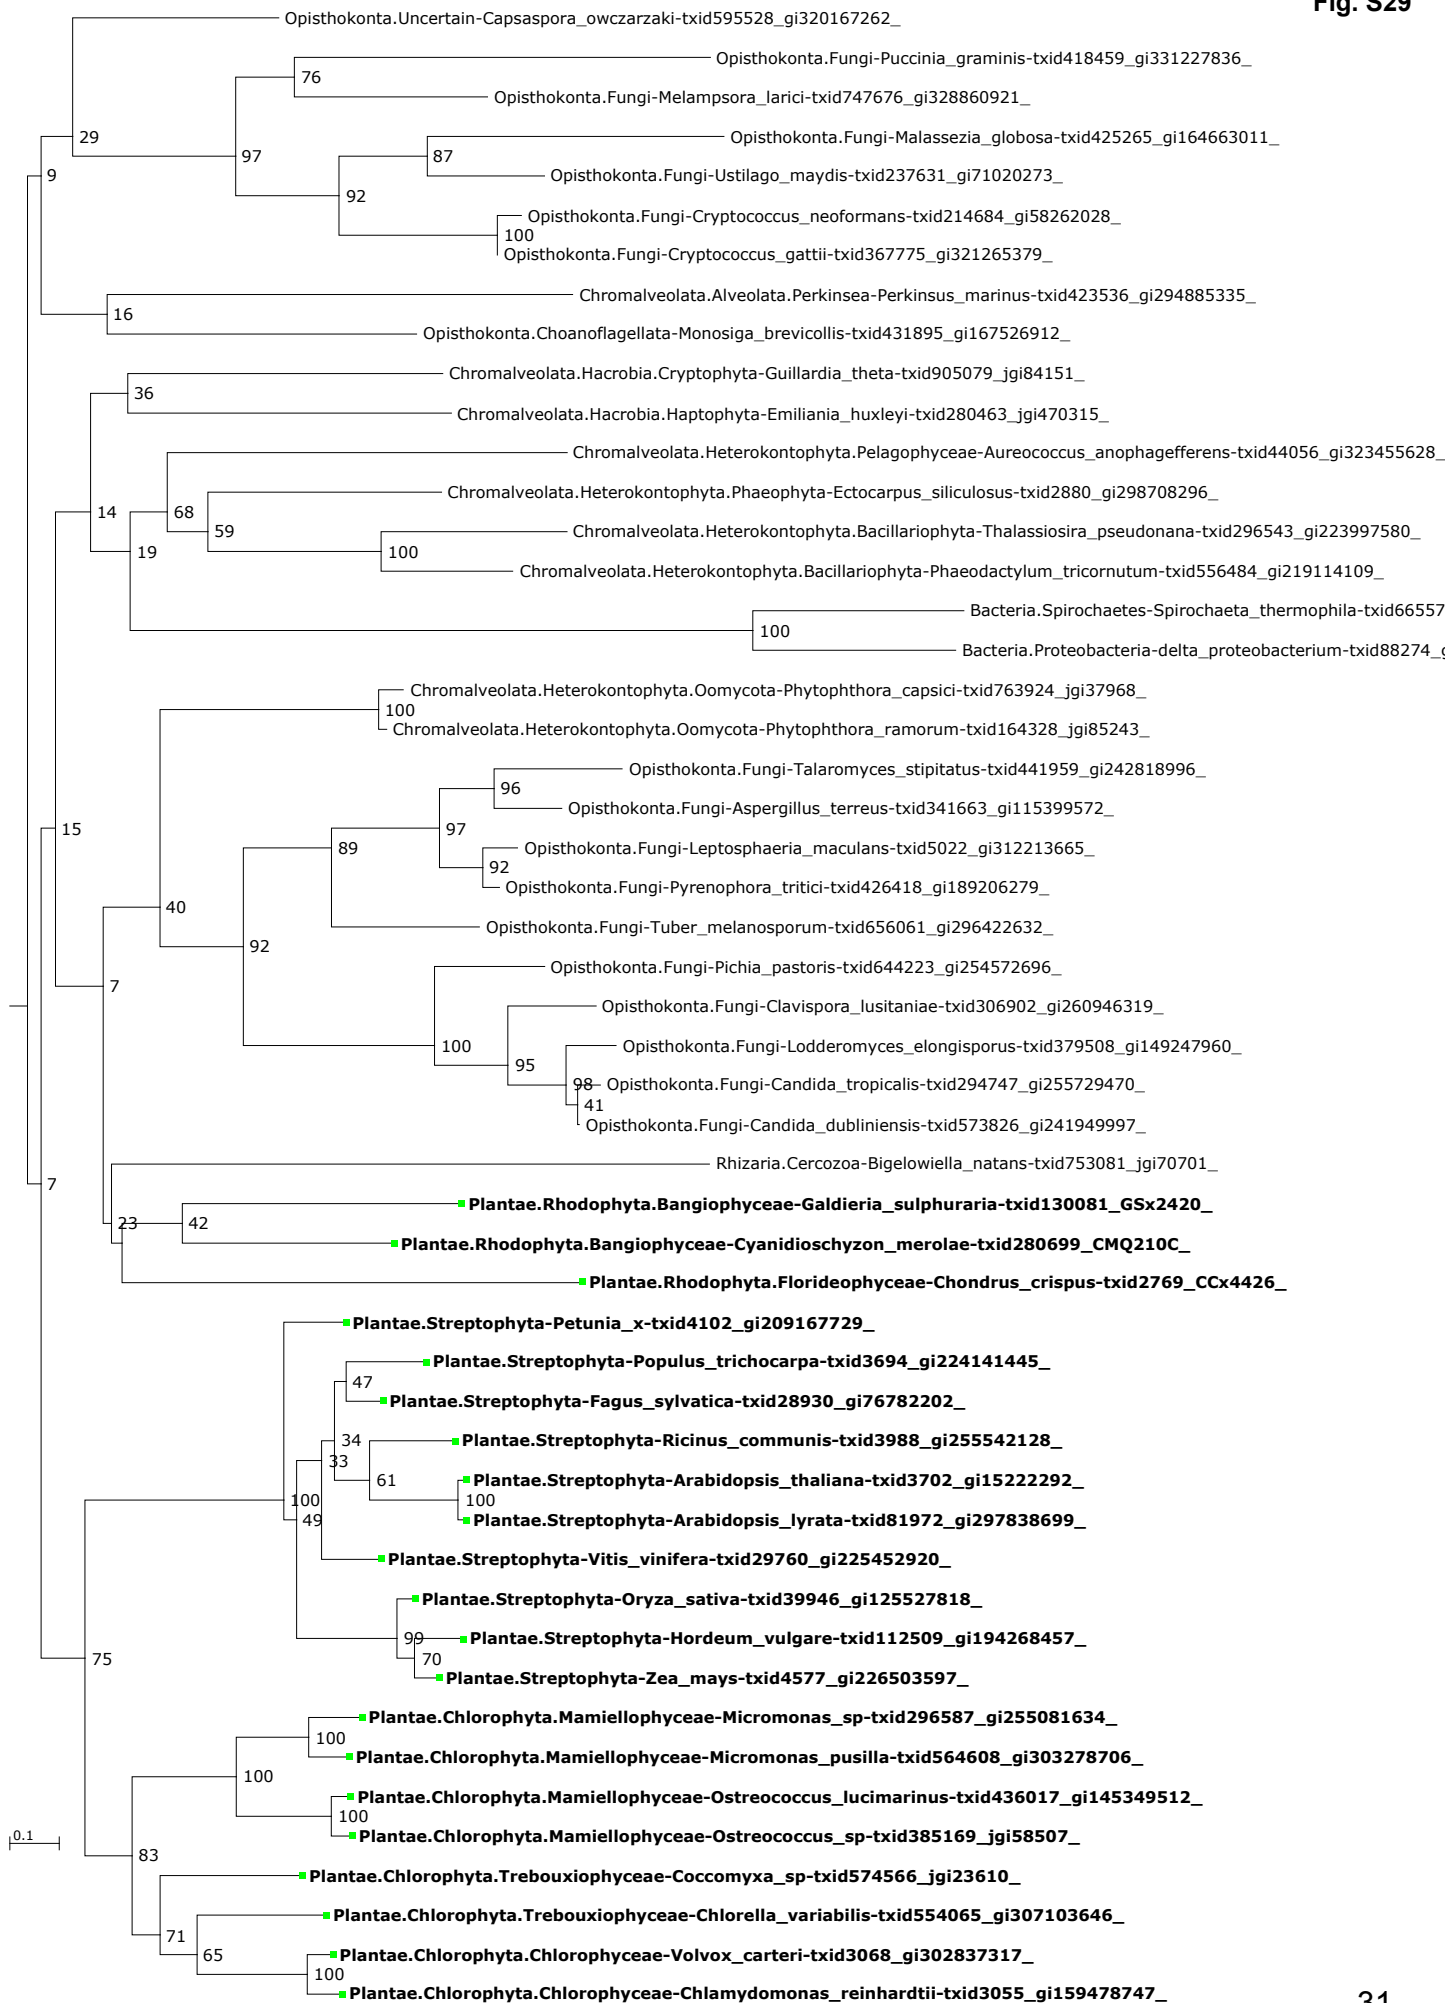

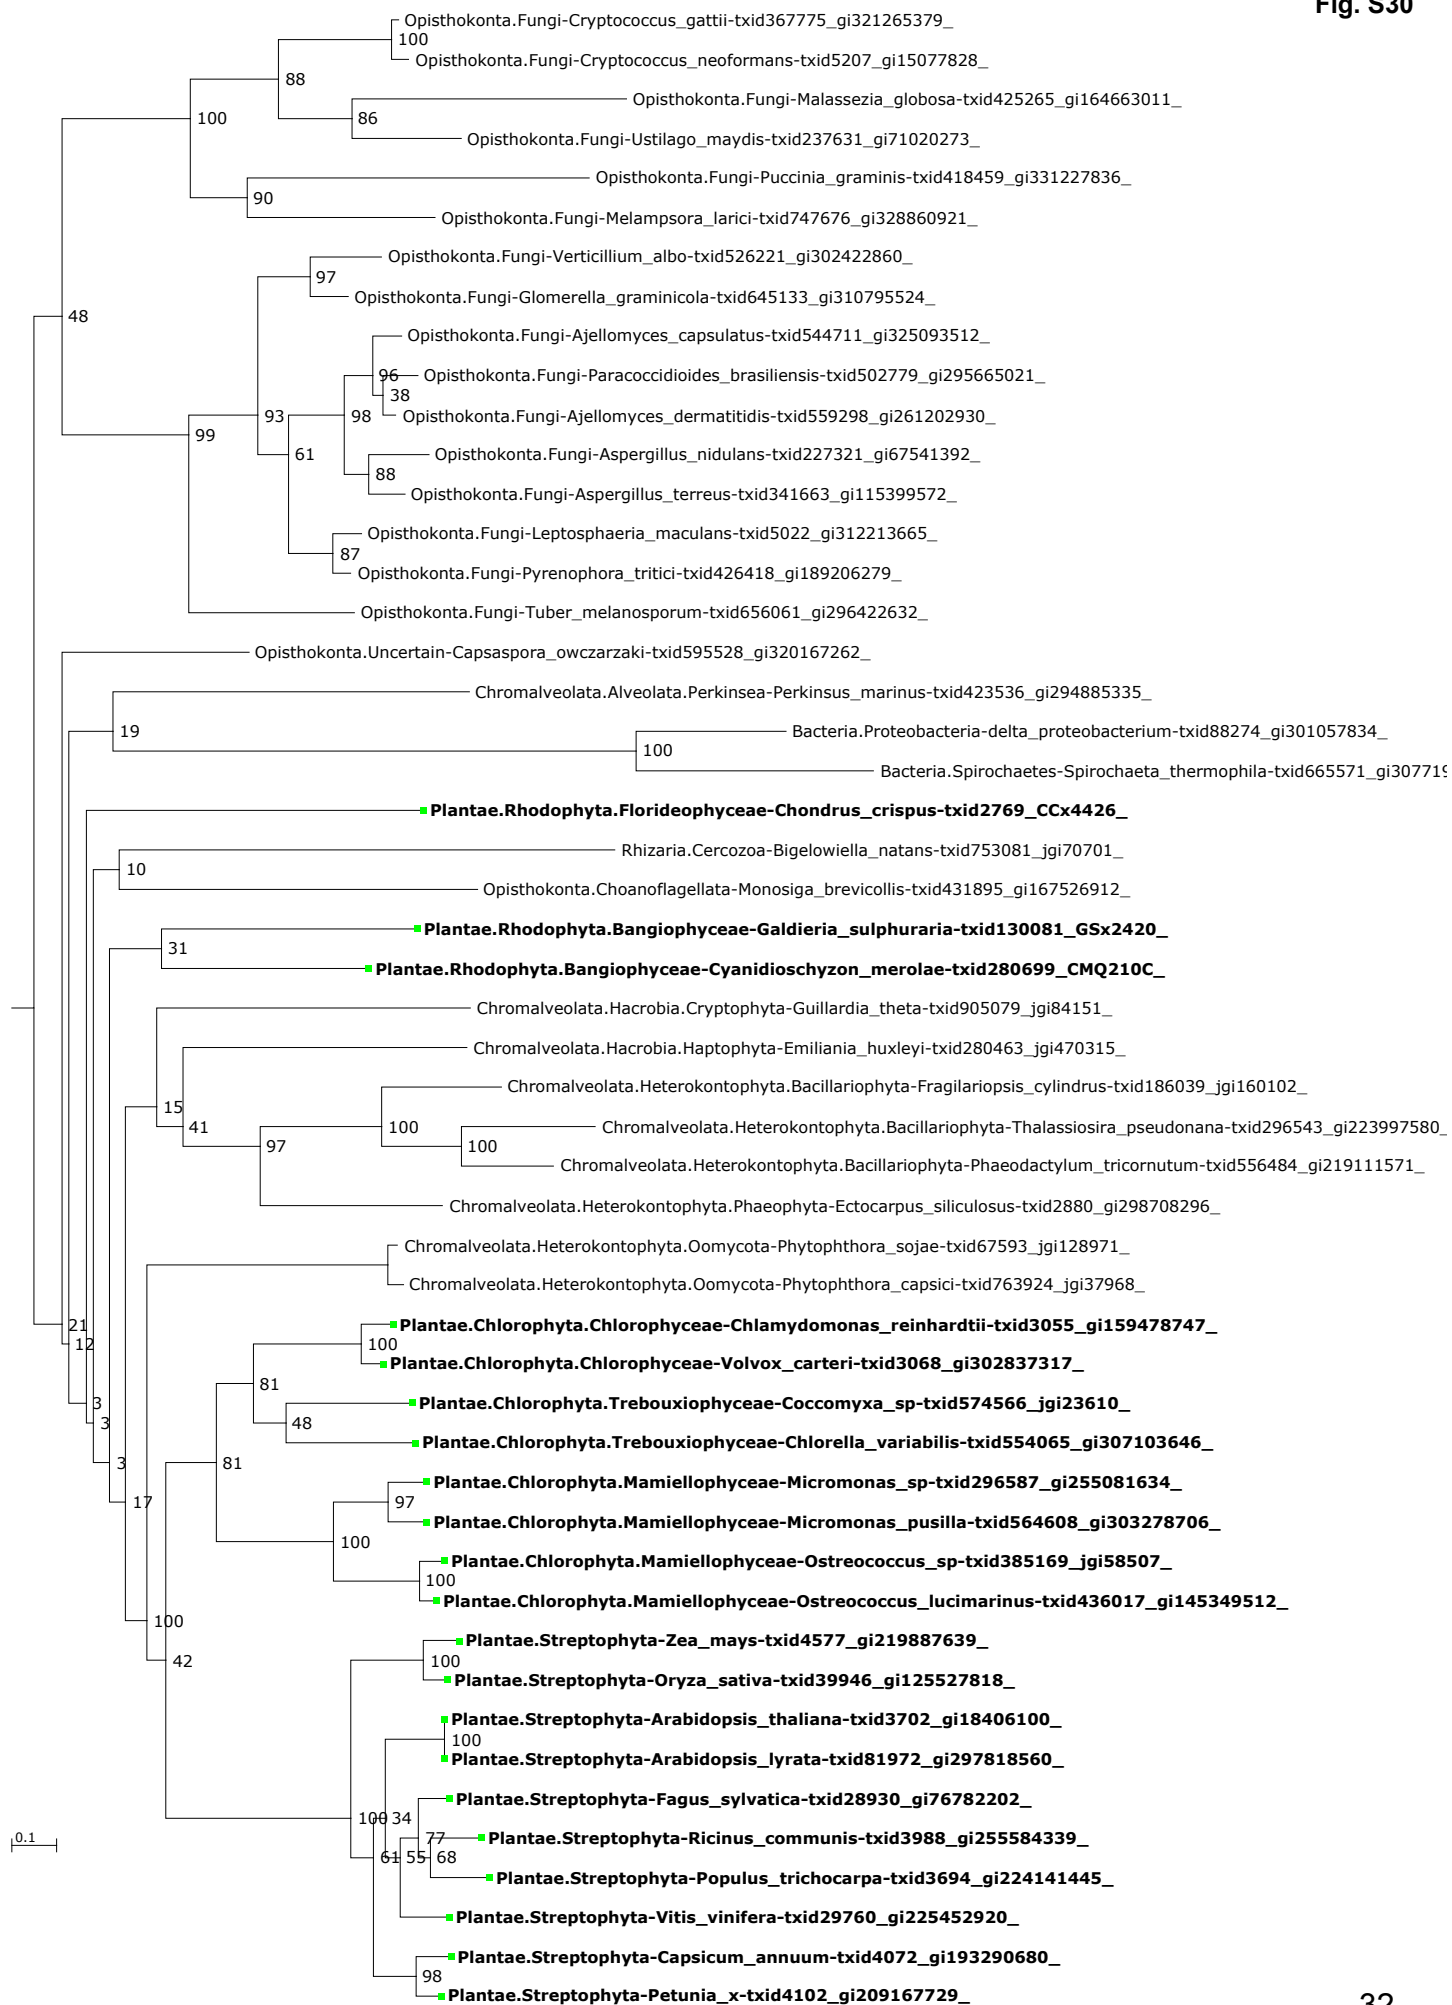



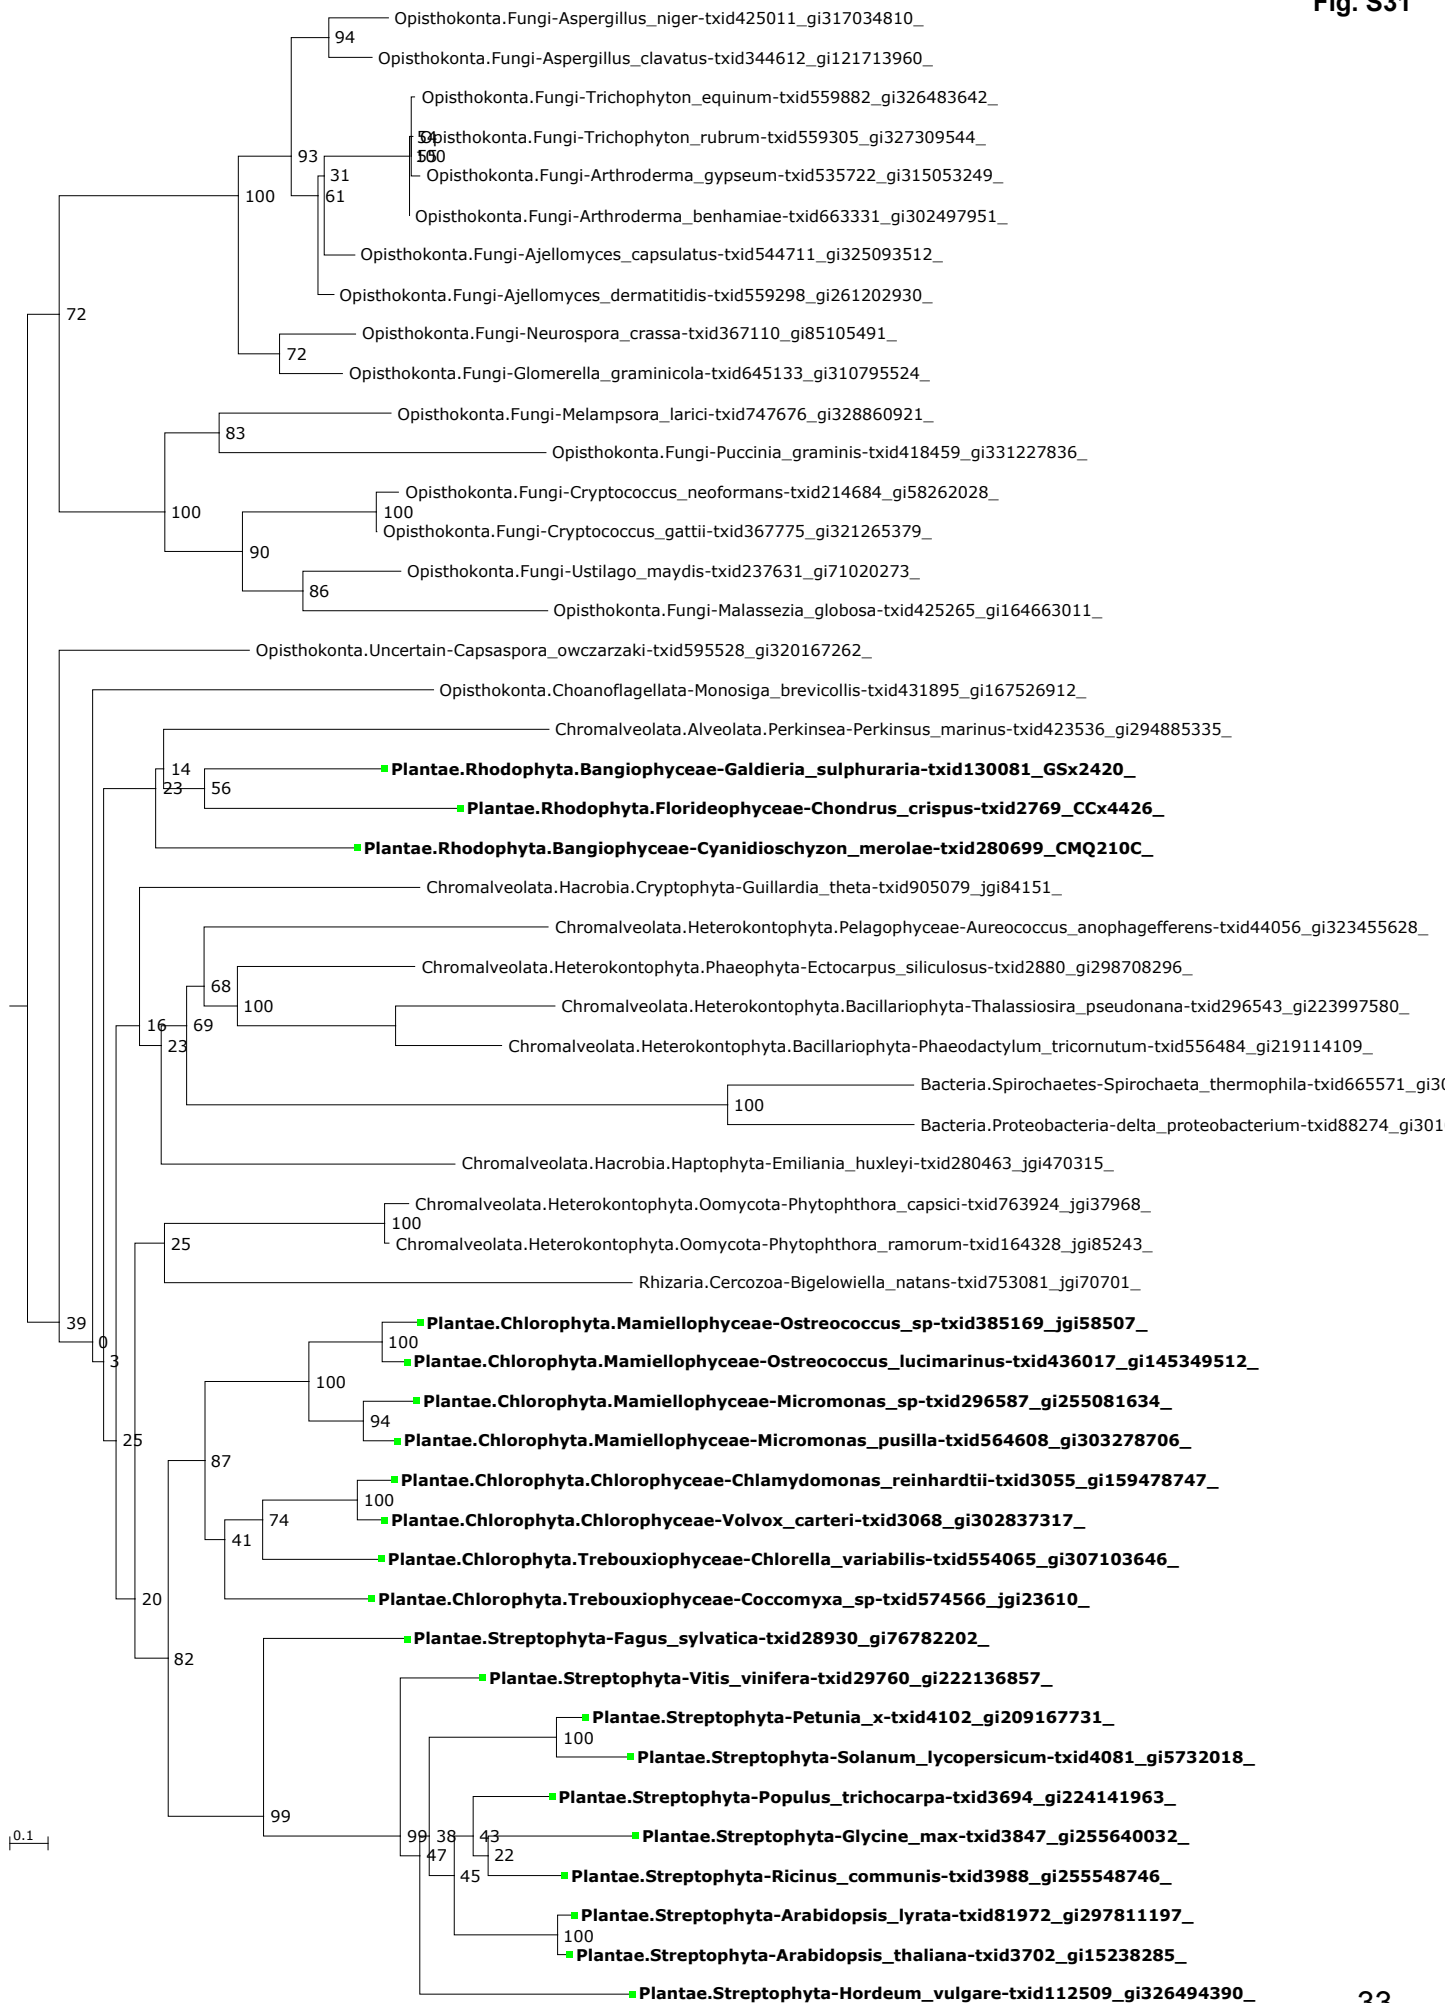

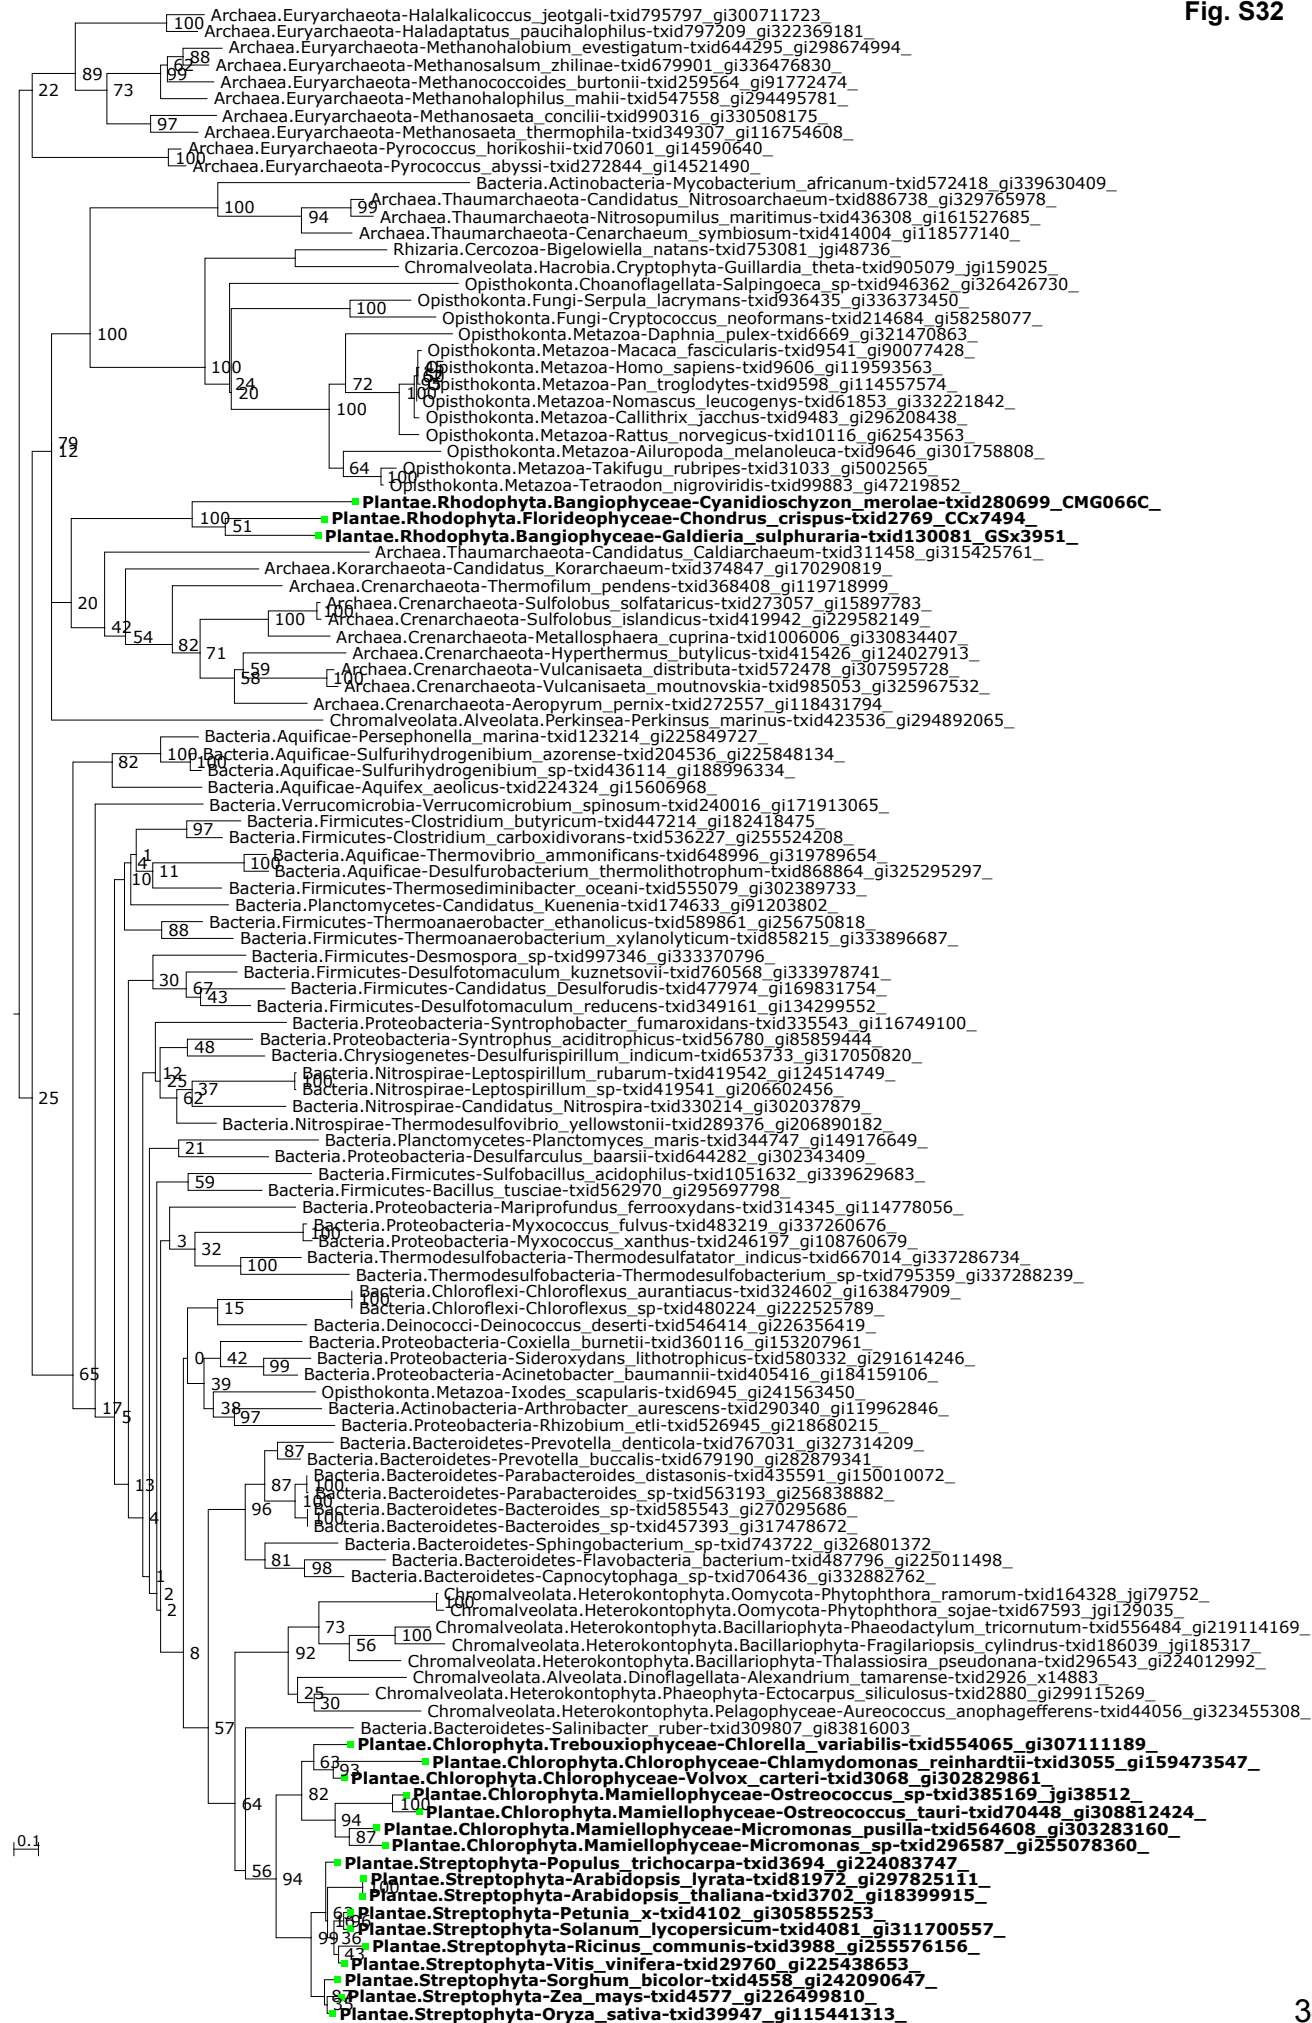

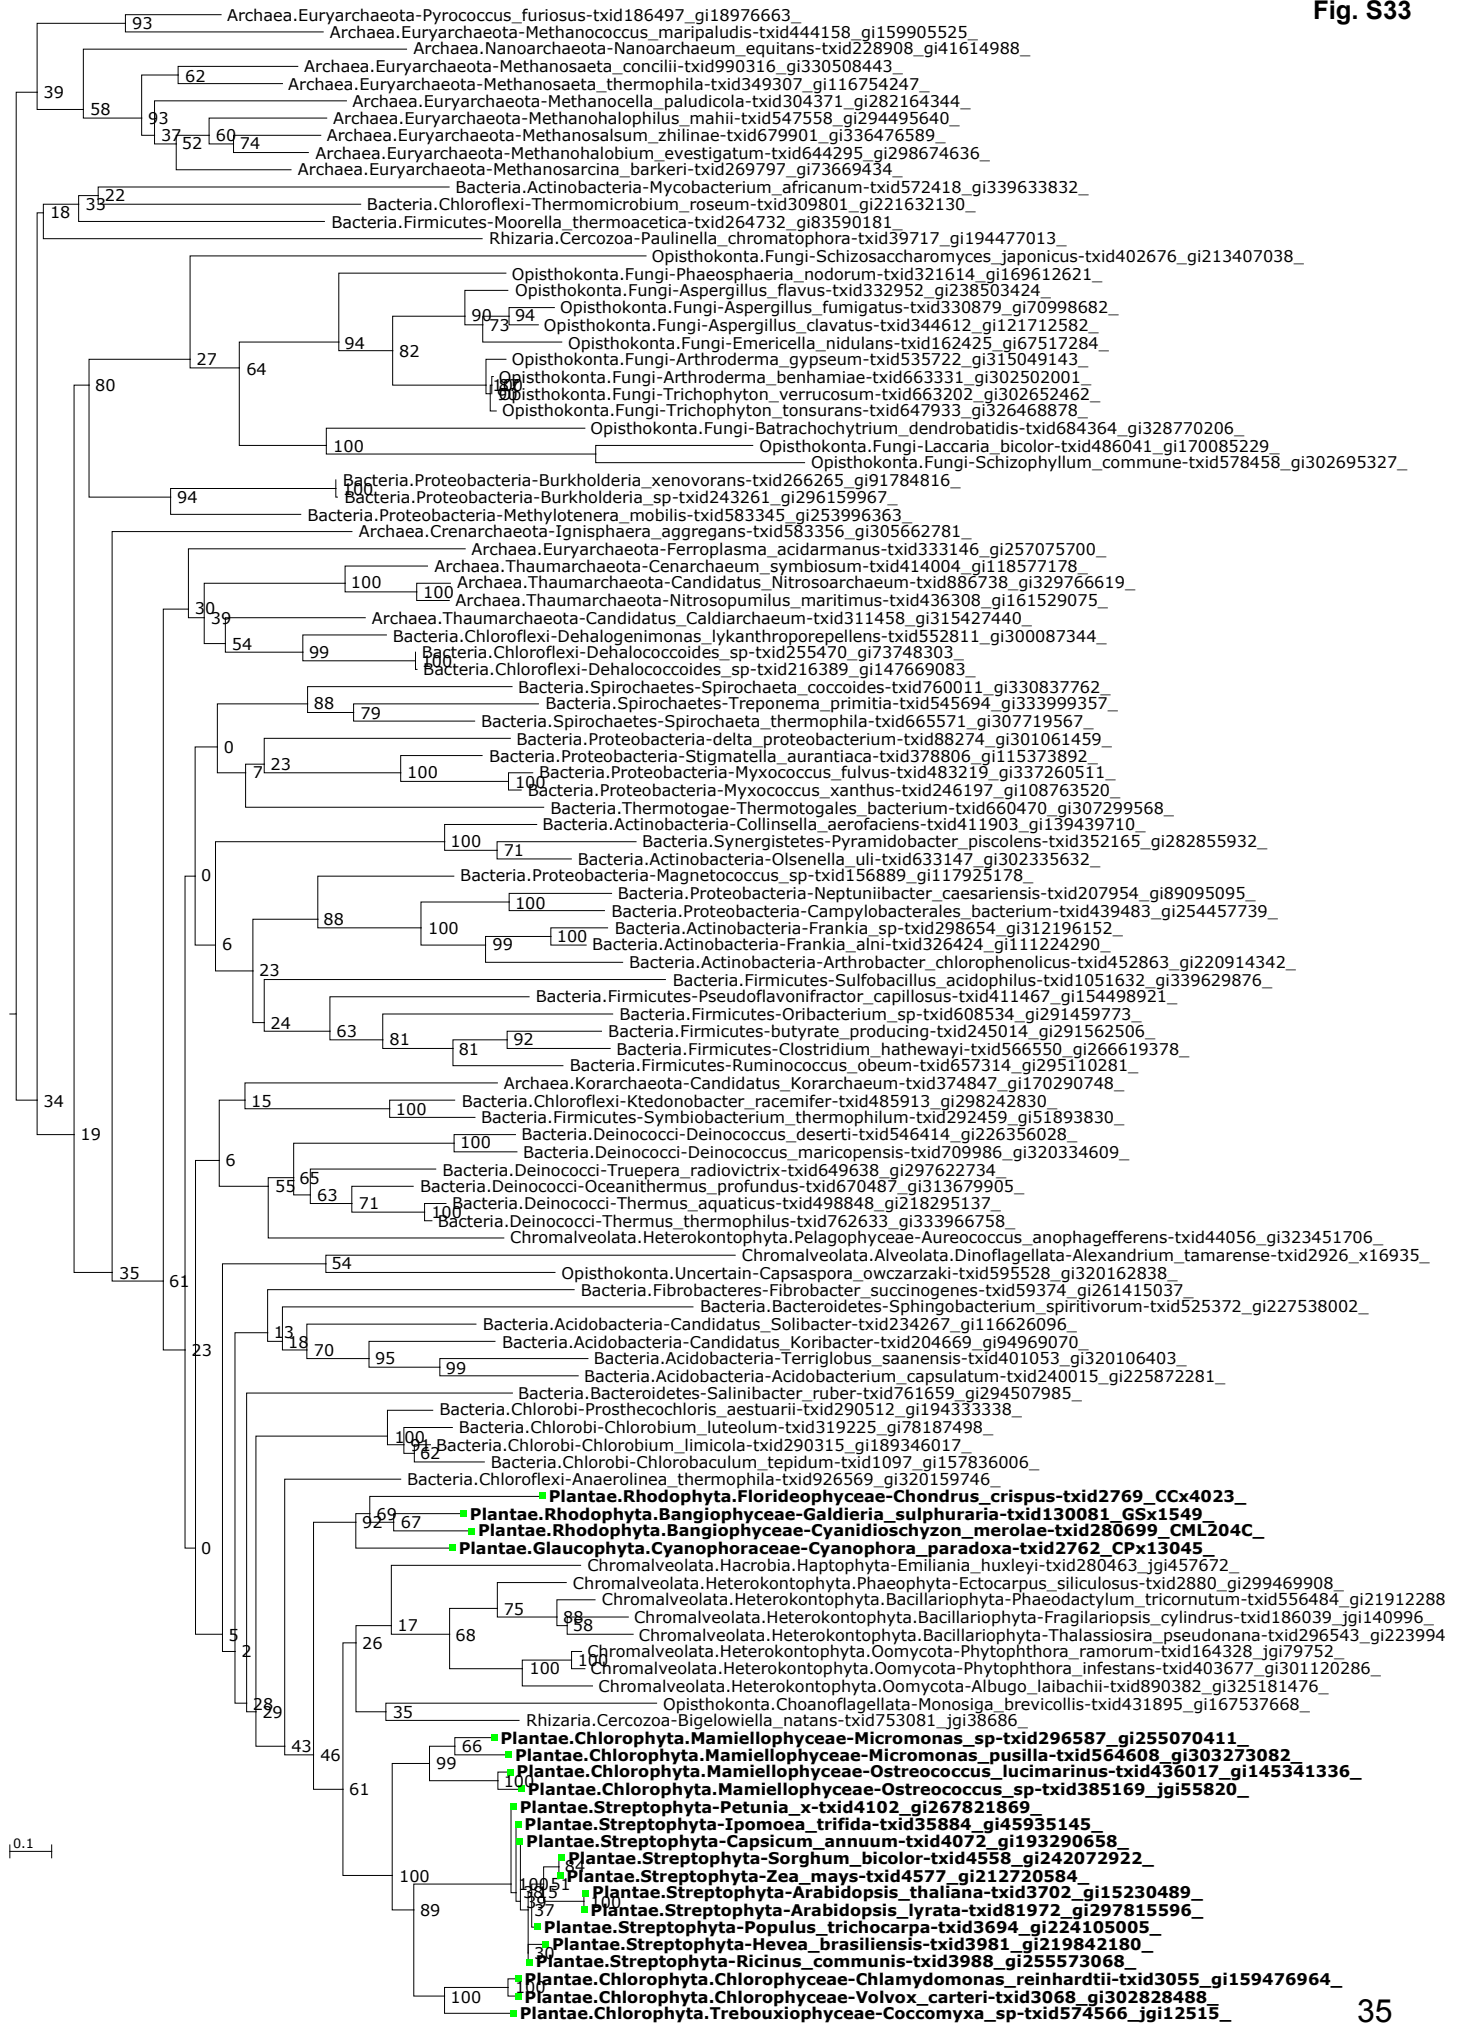

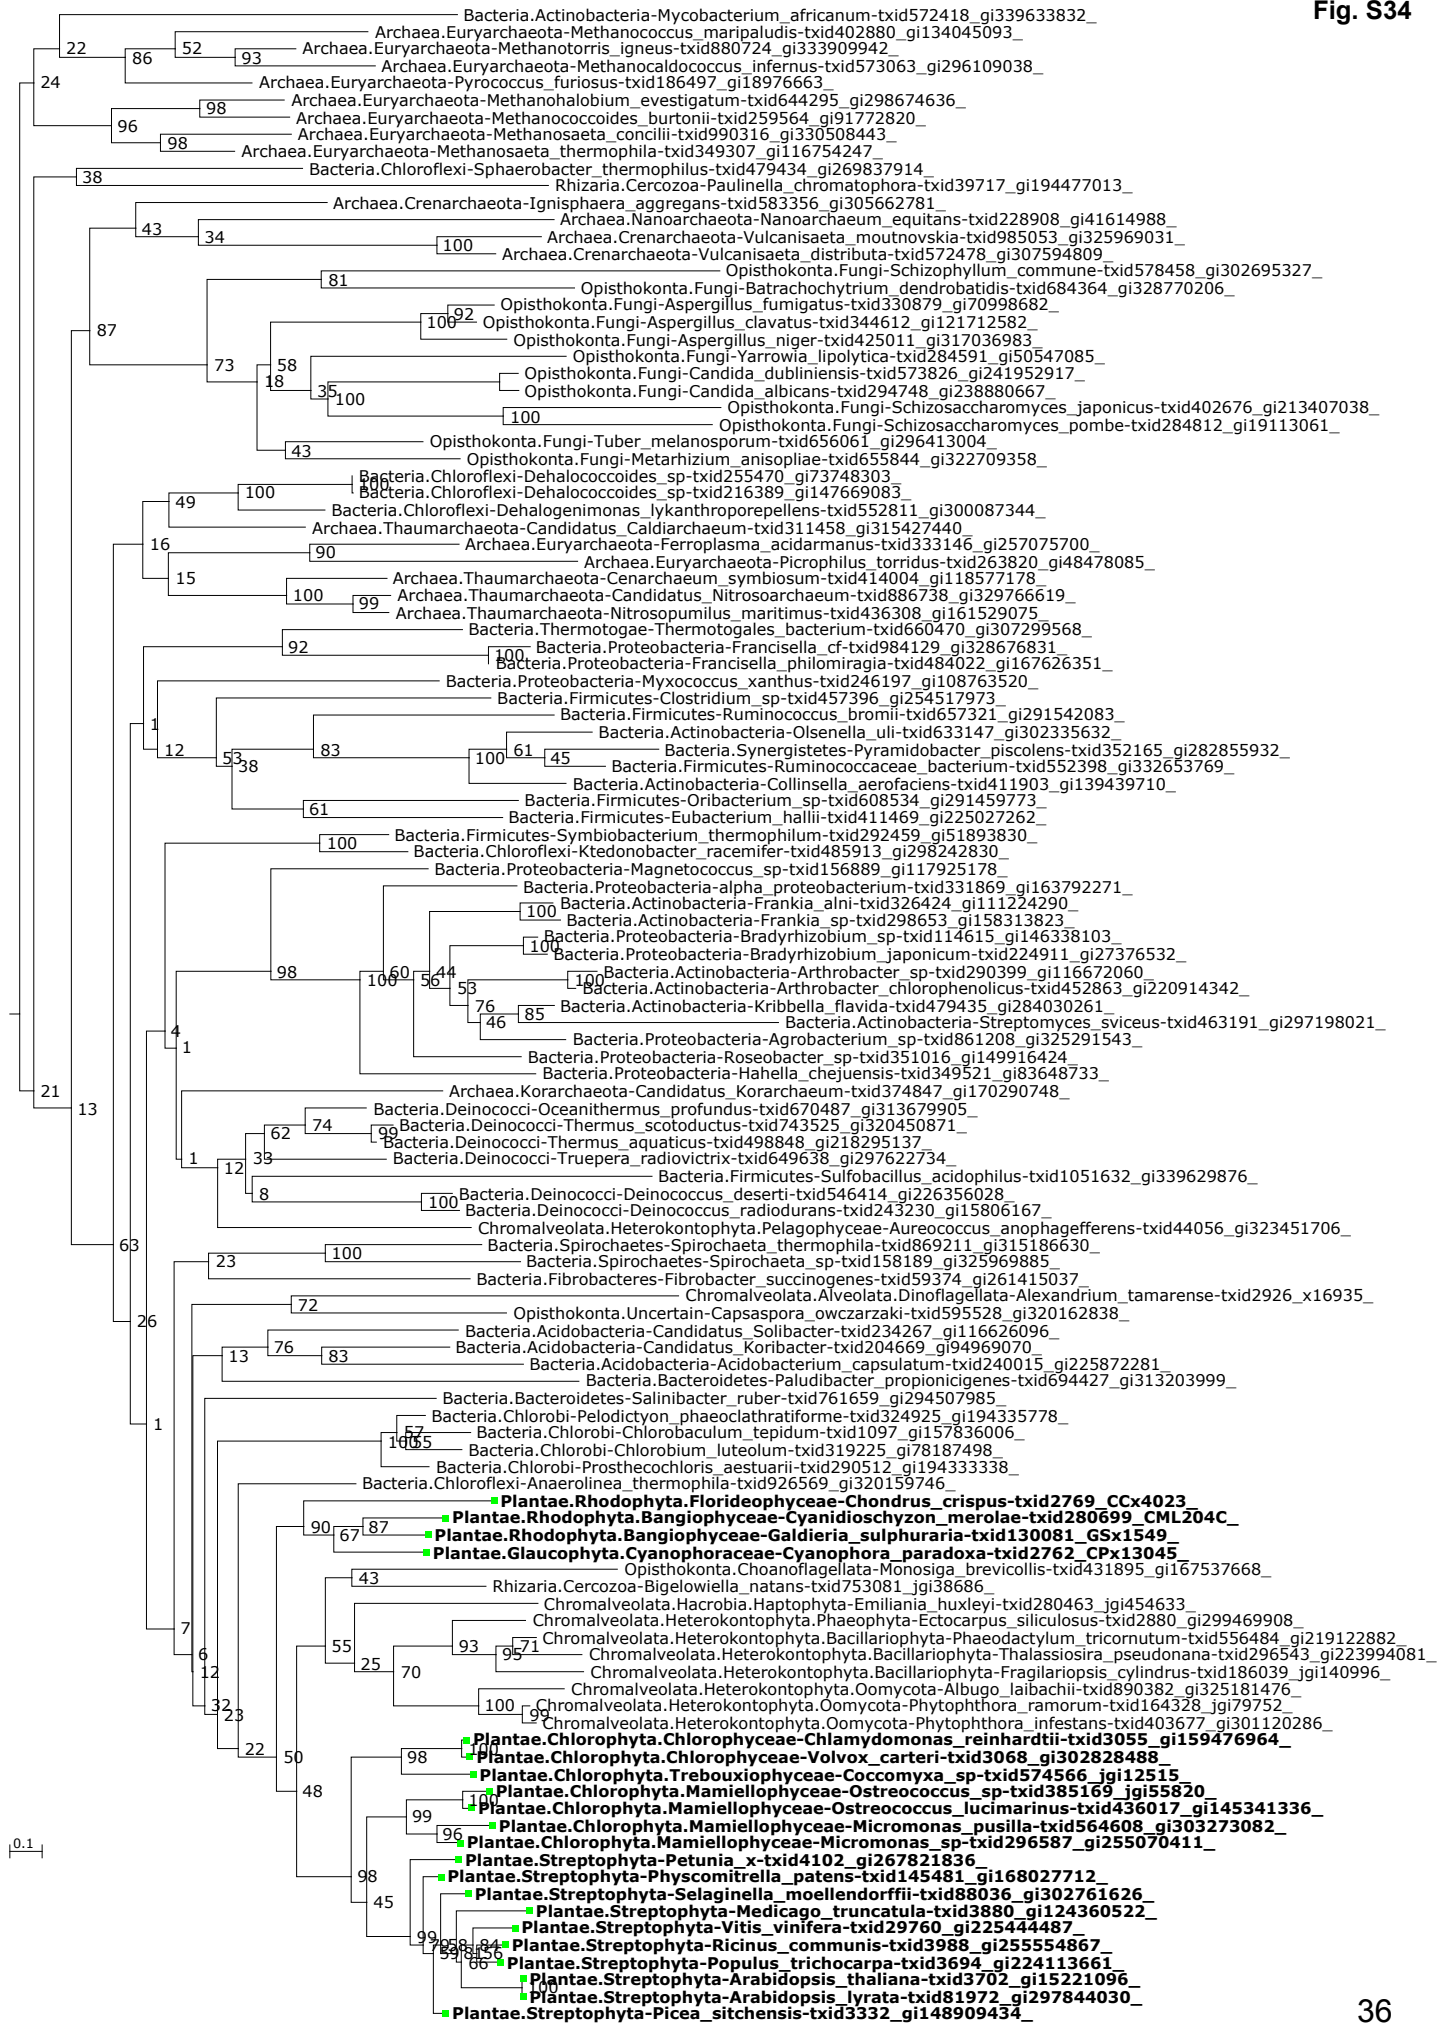

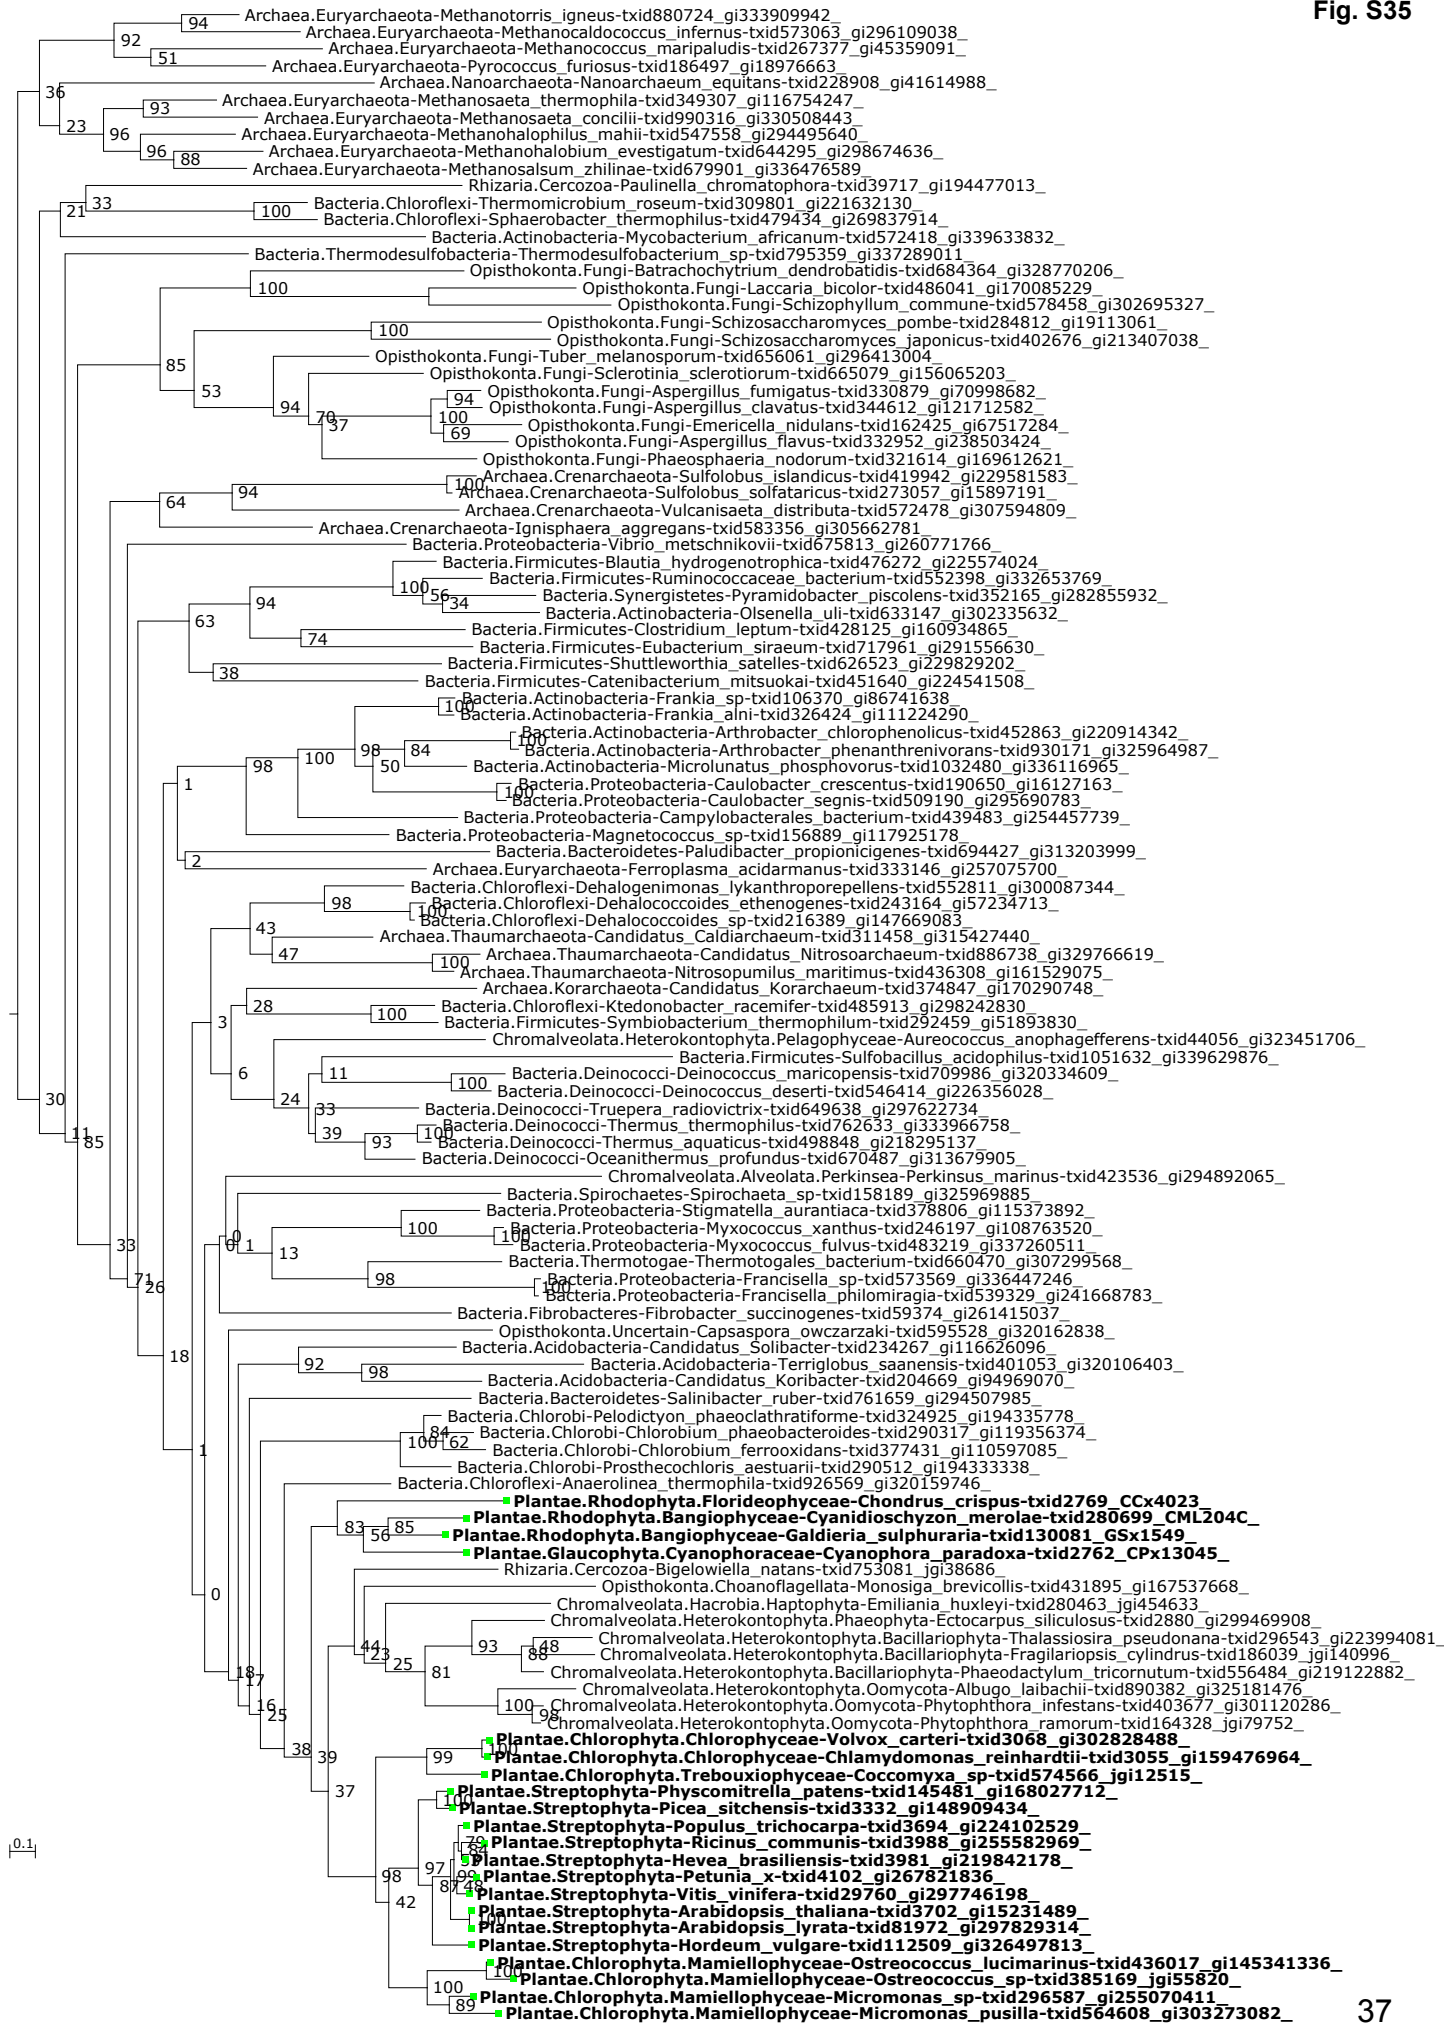

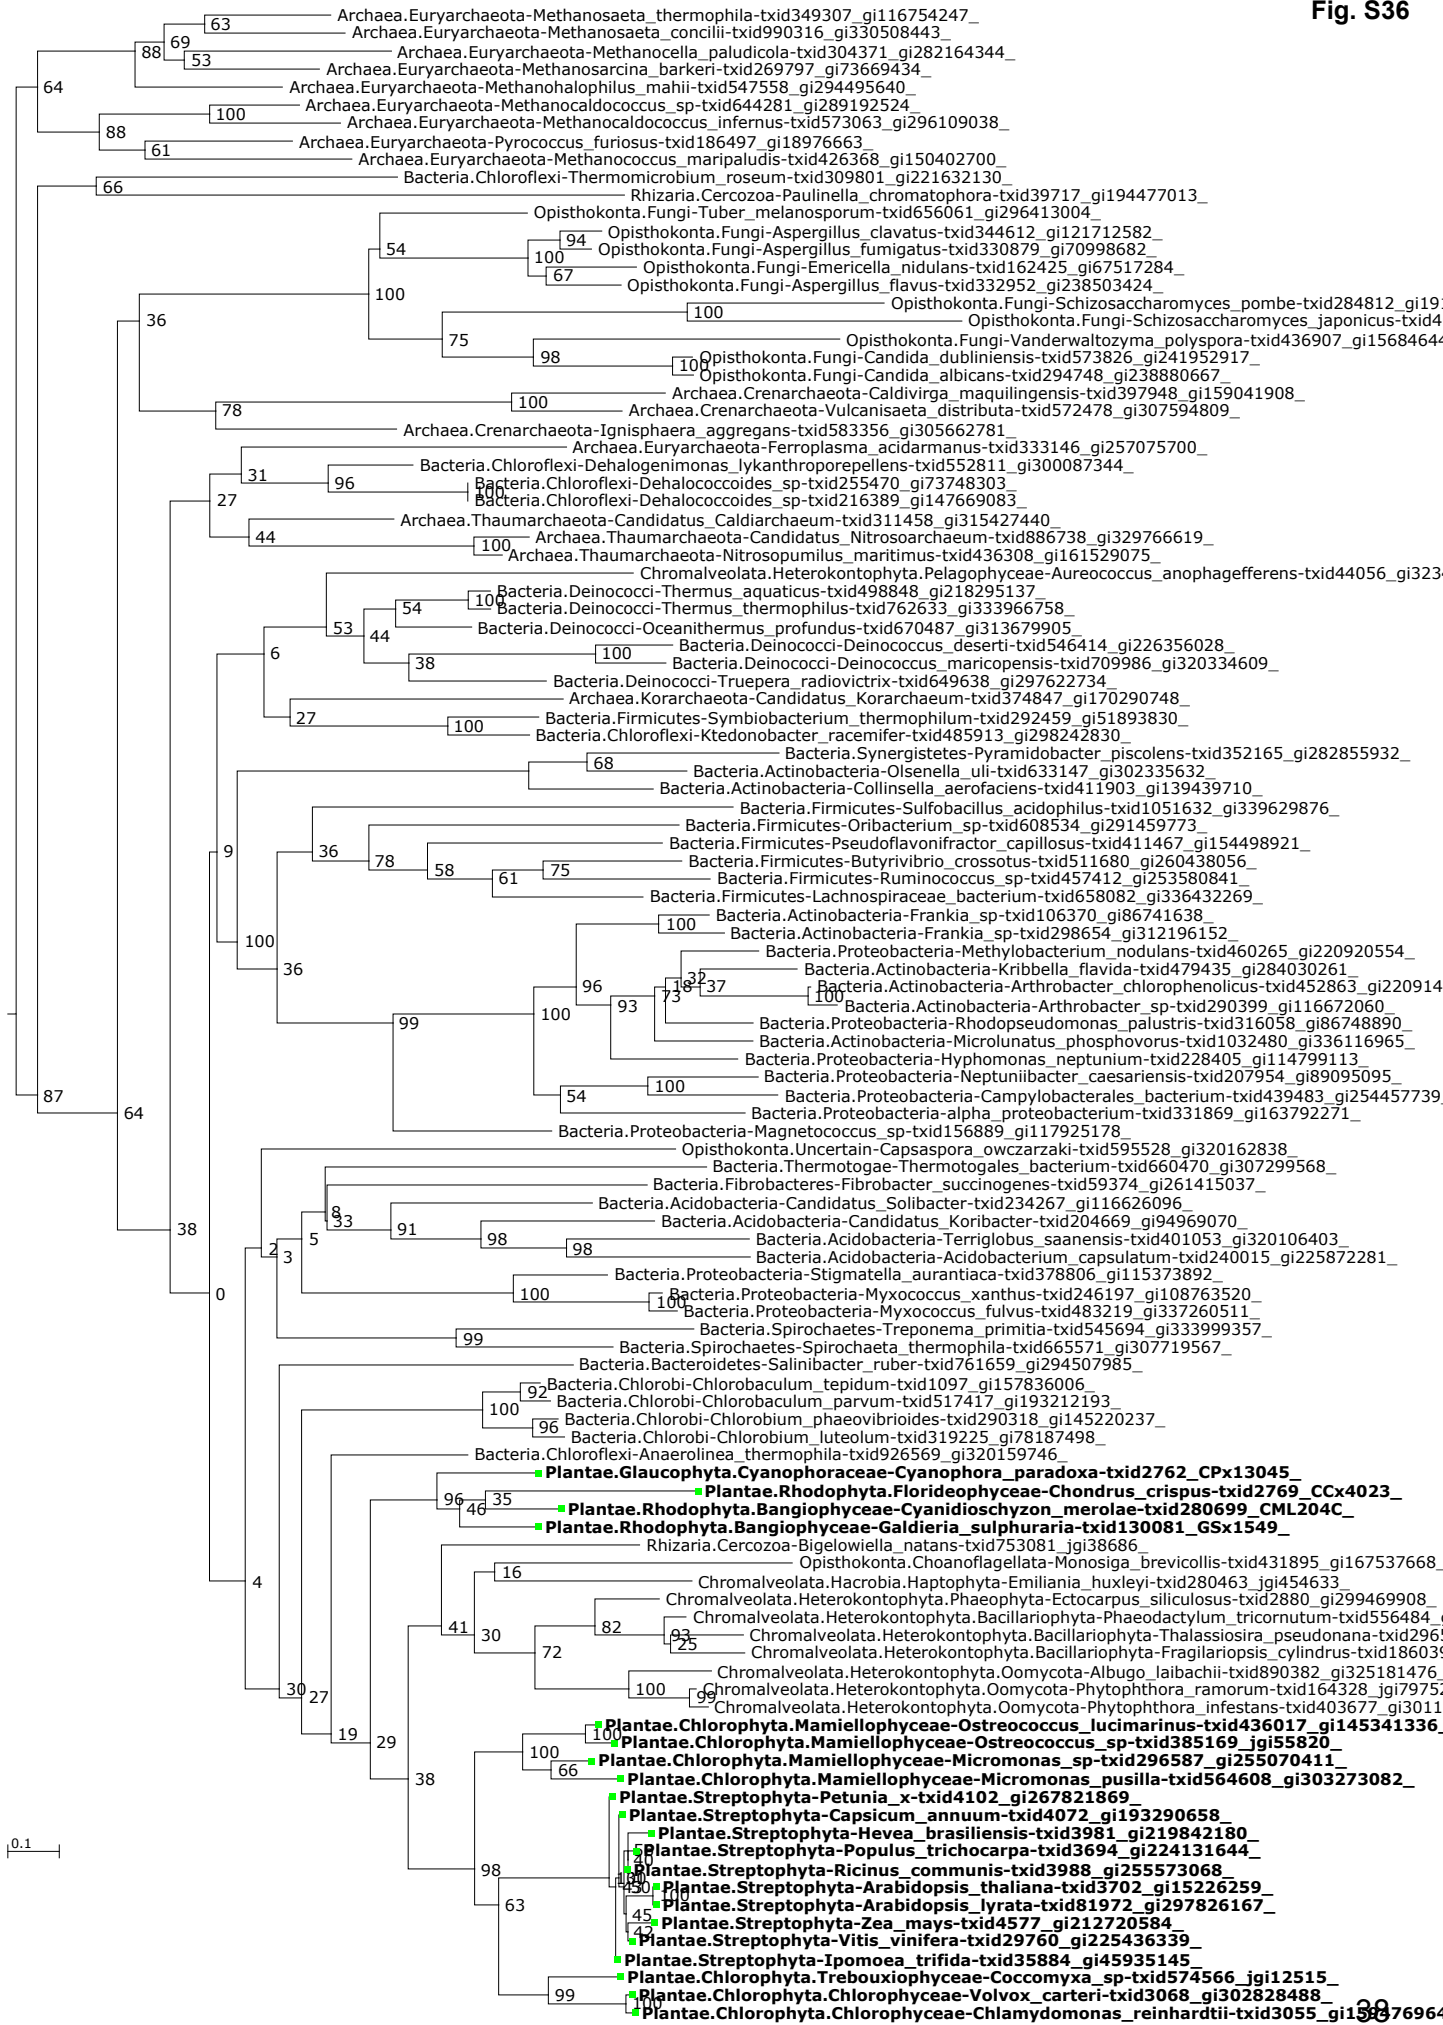

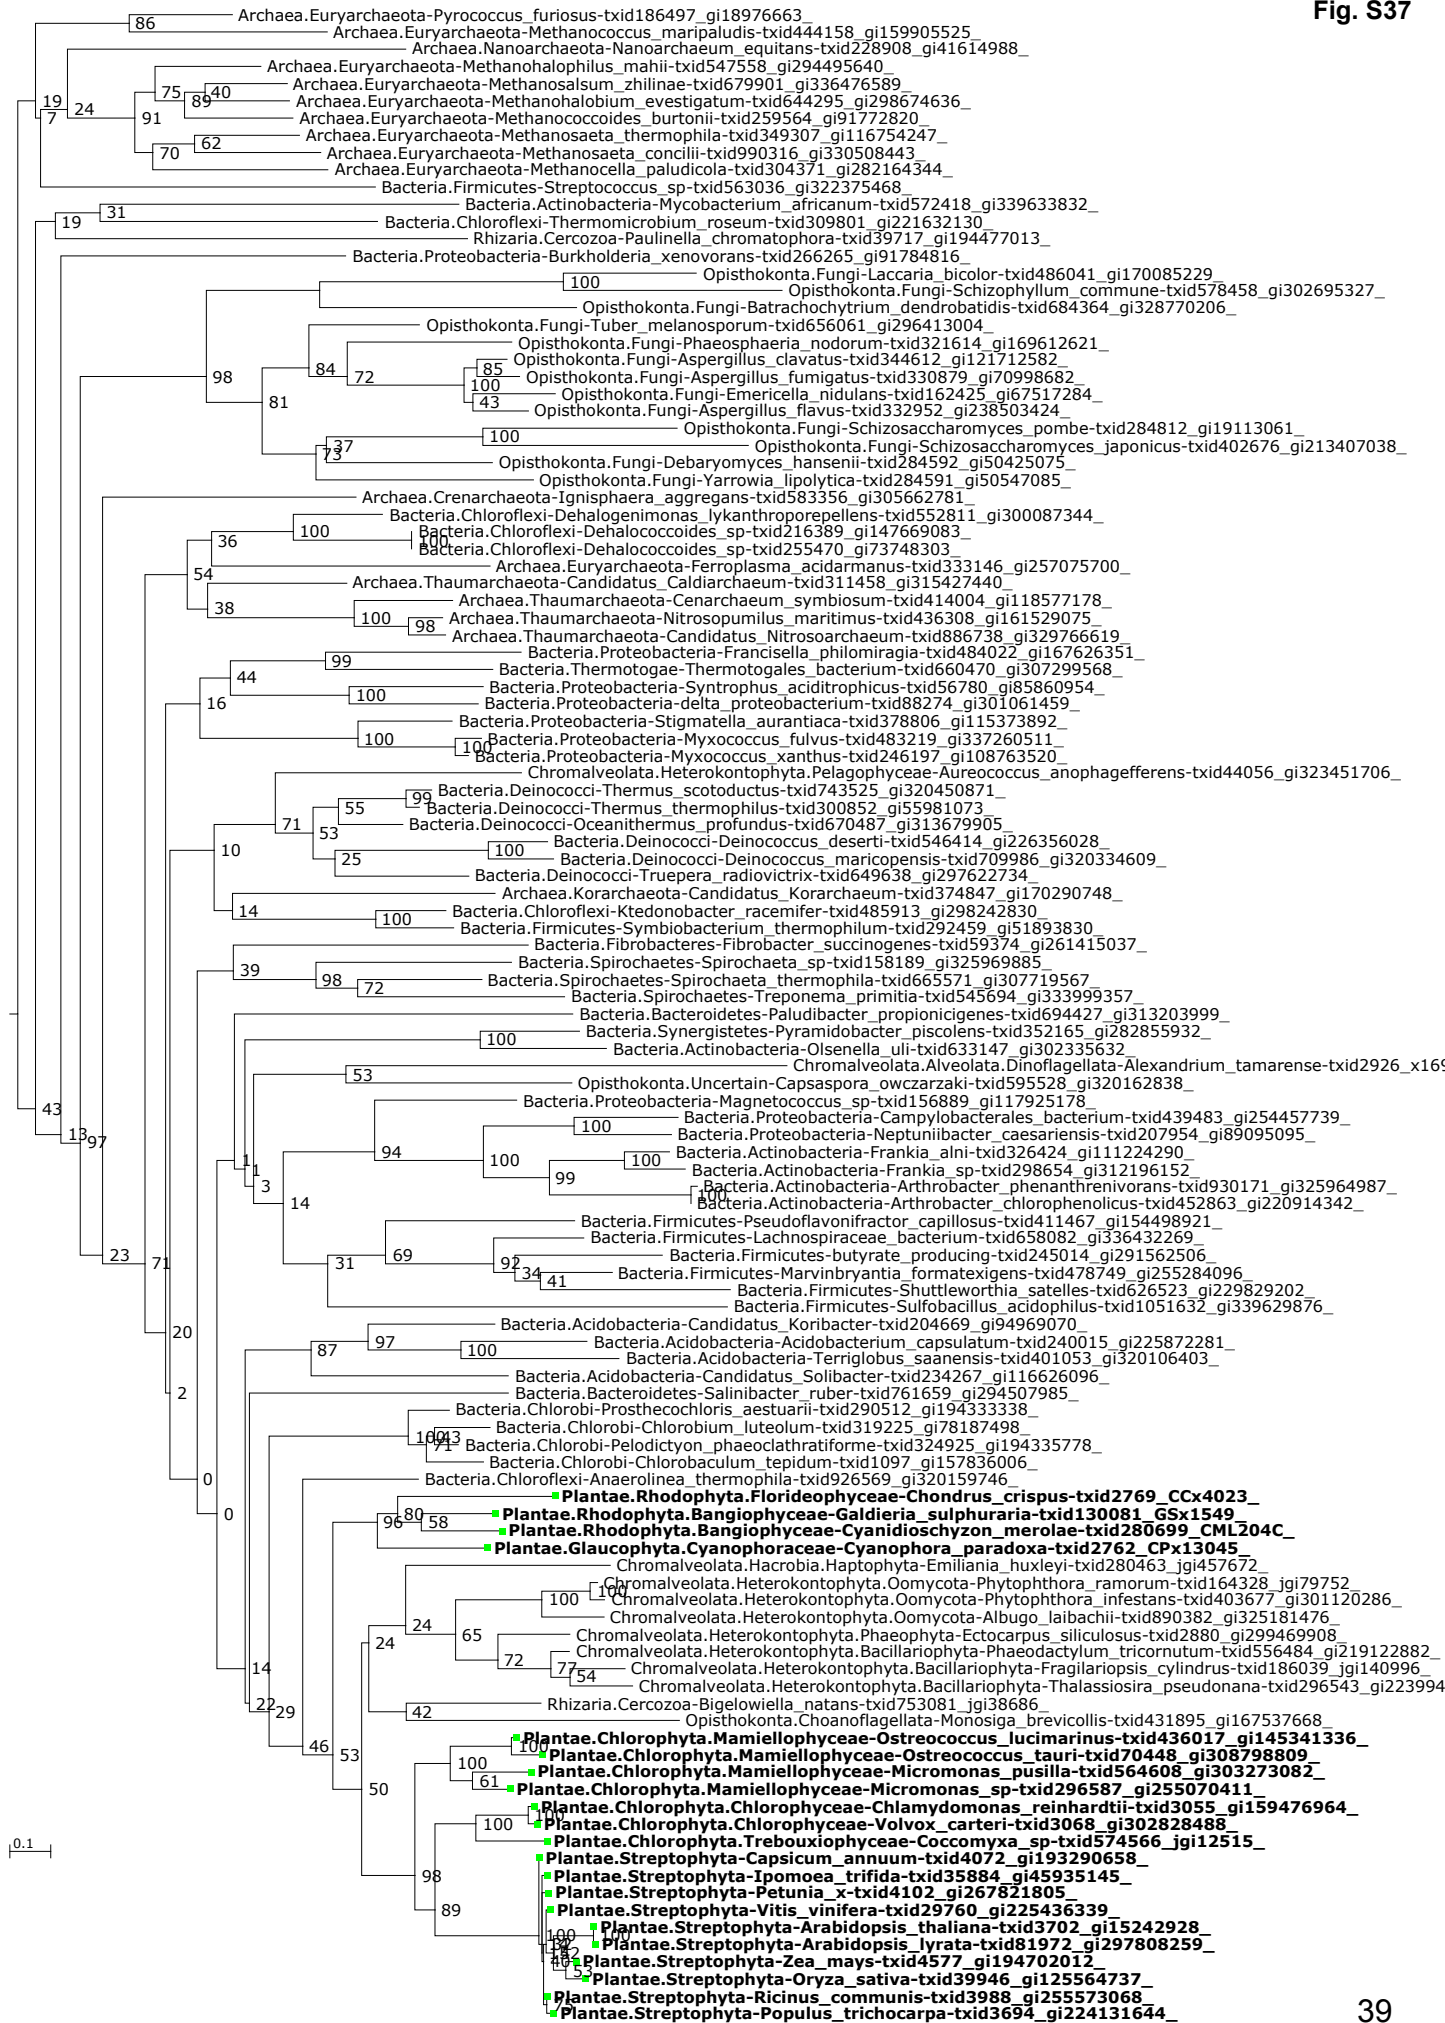

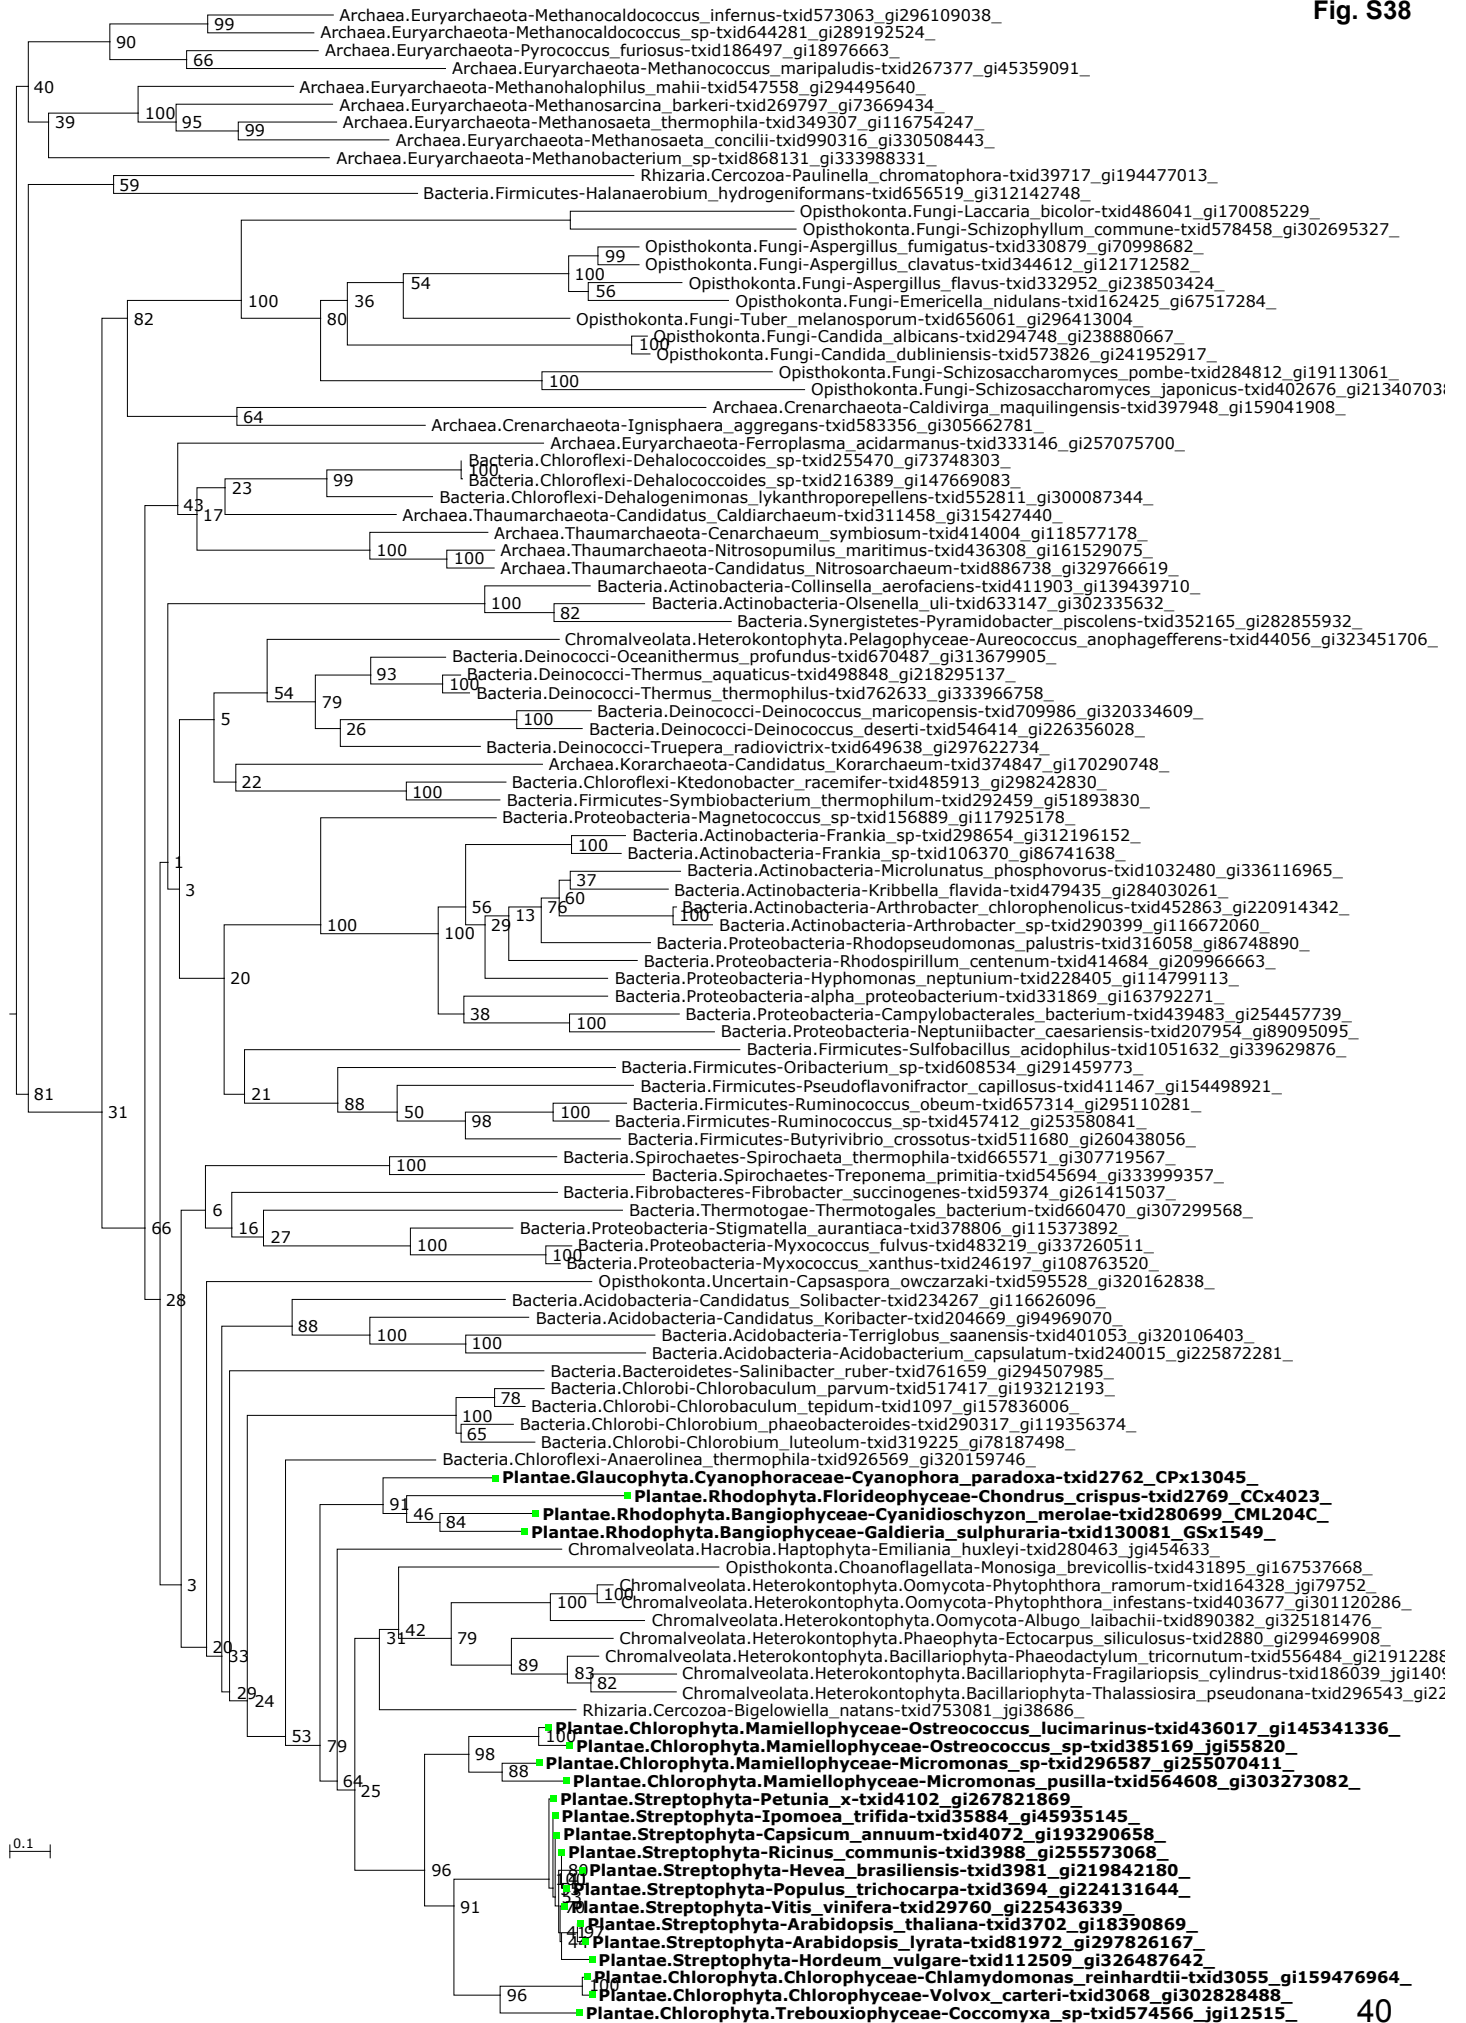



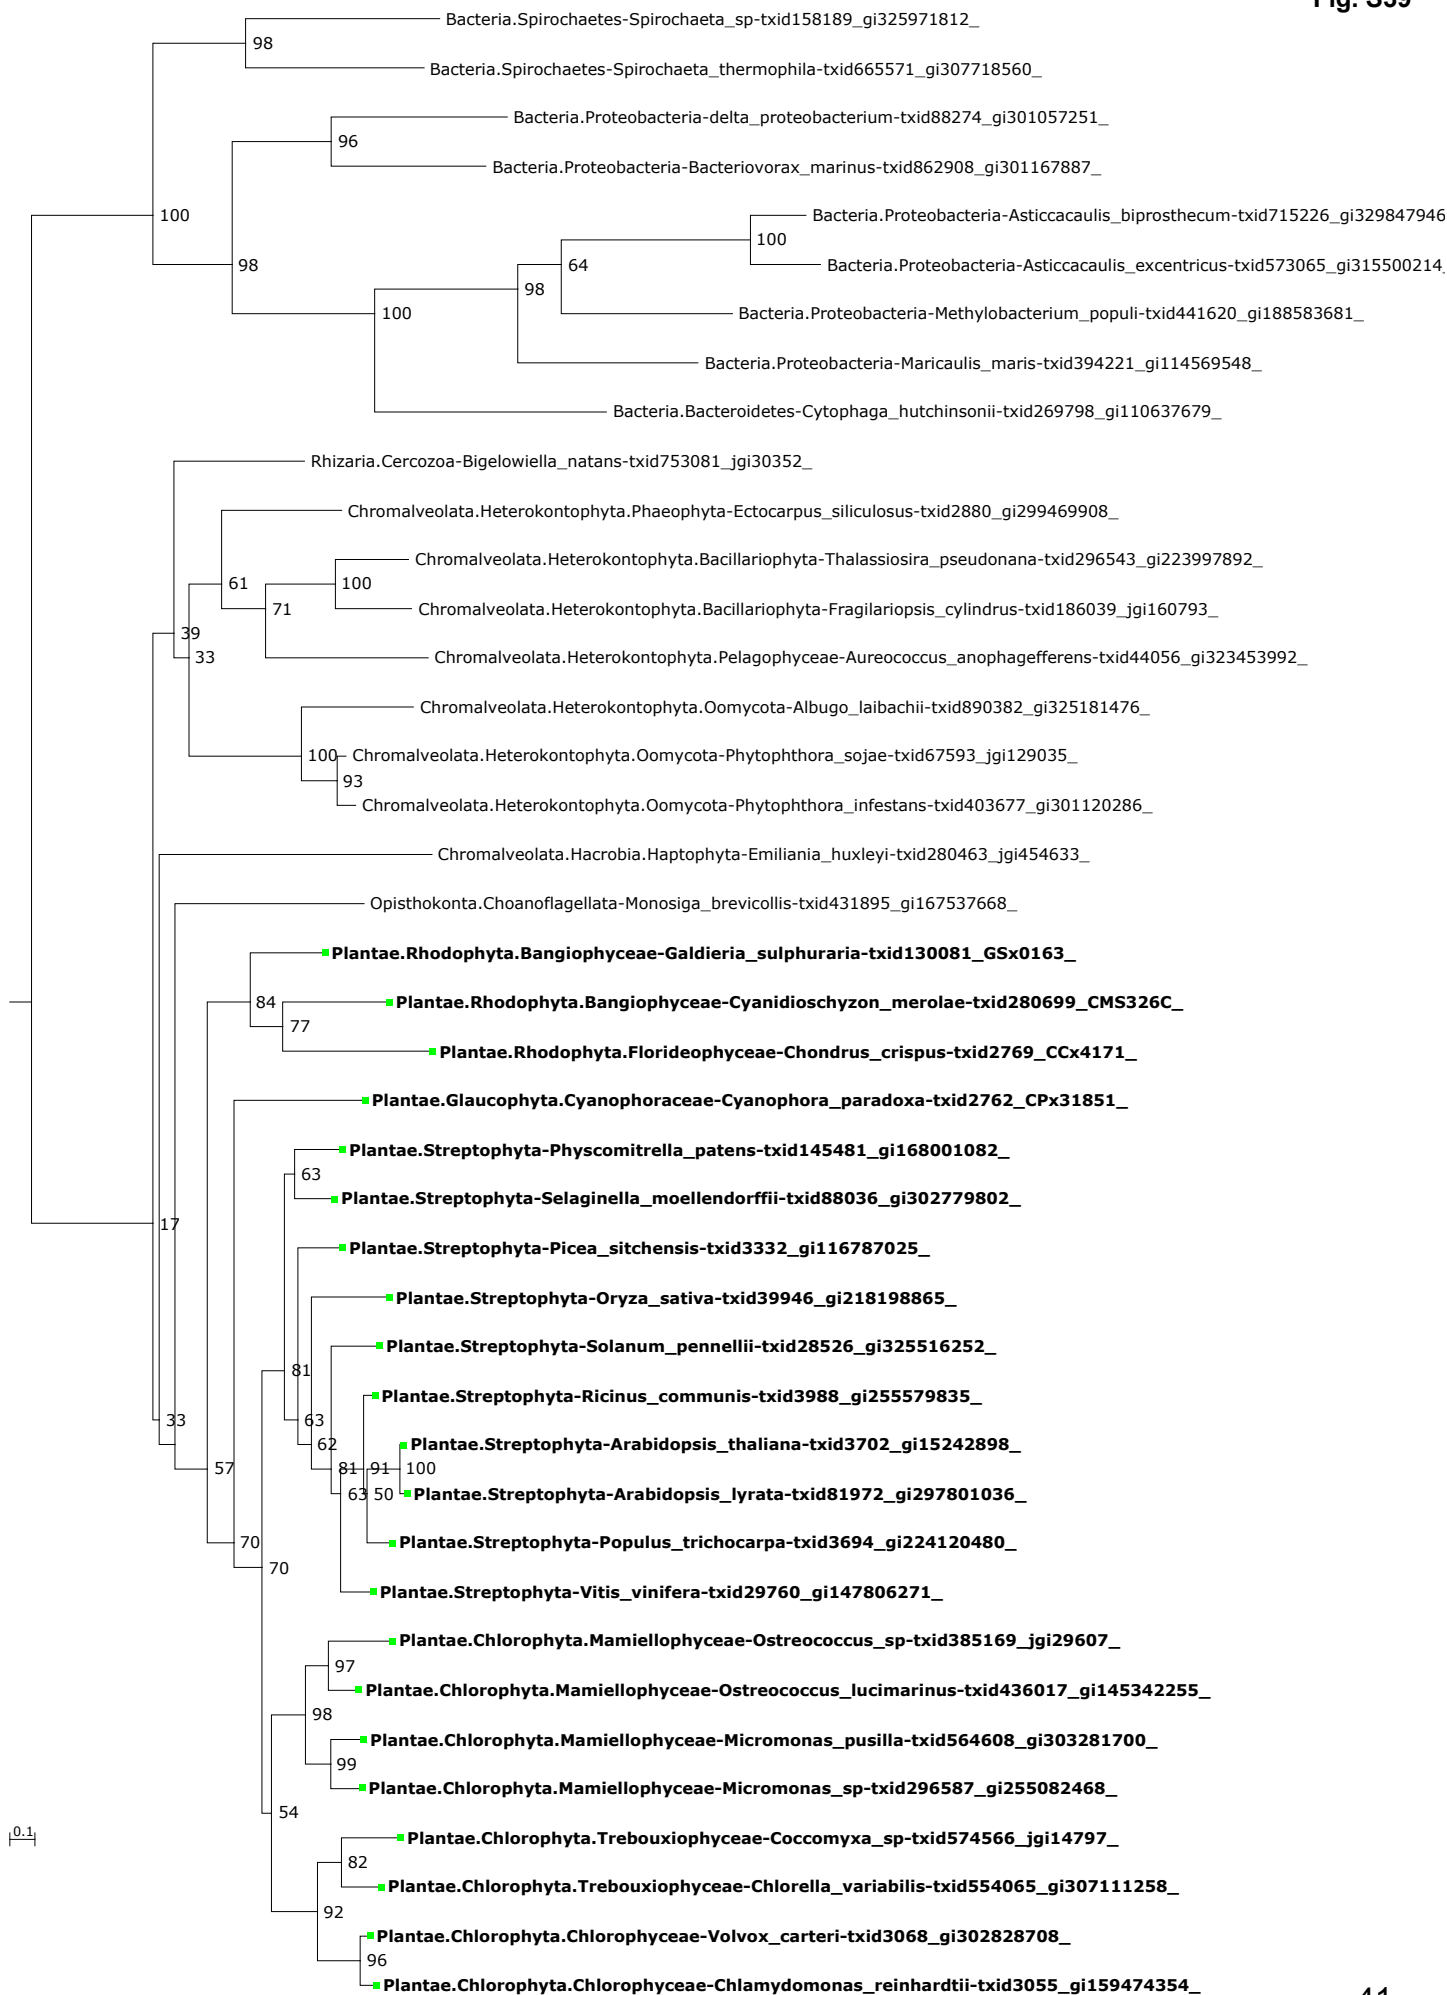

0.1

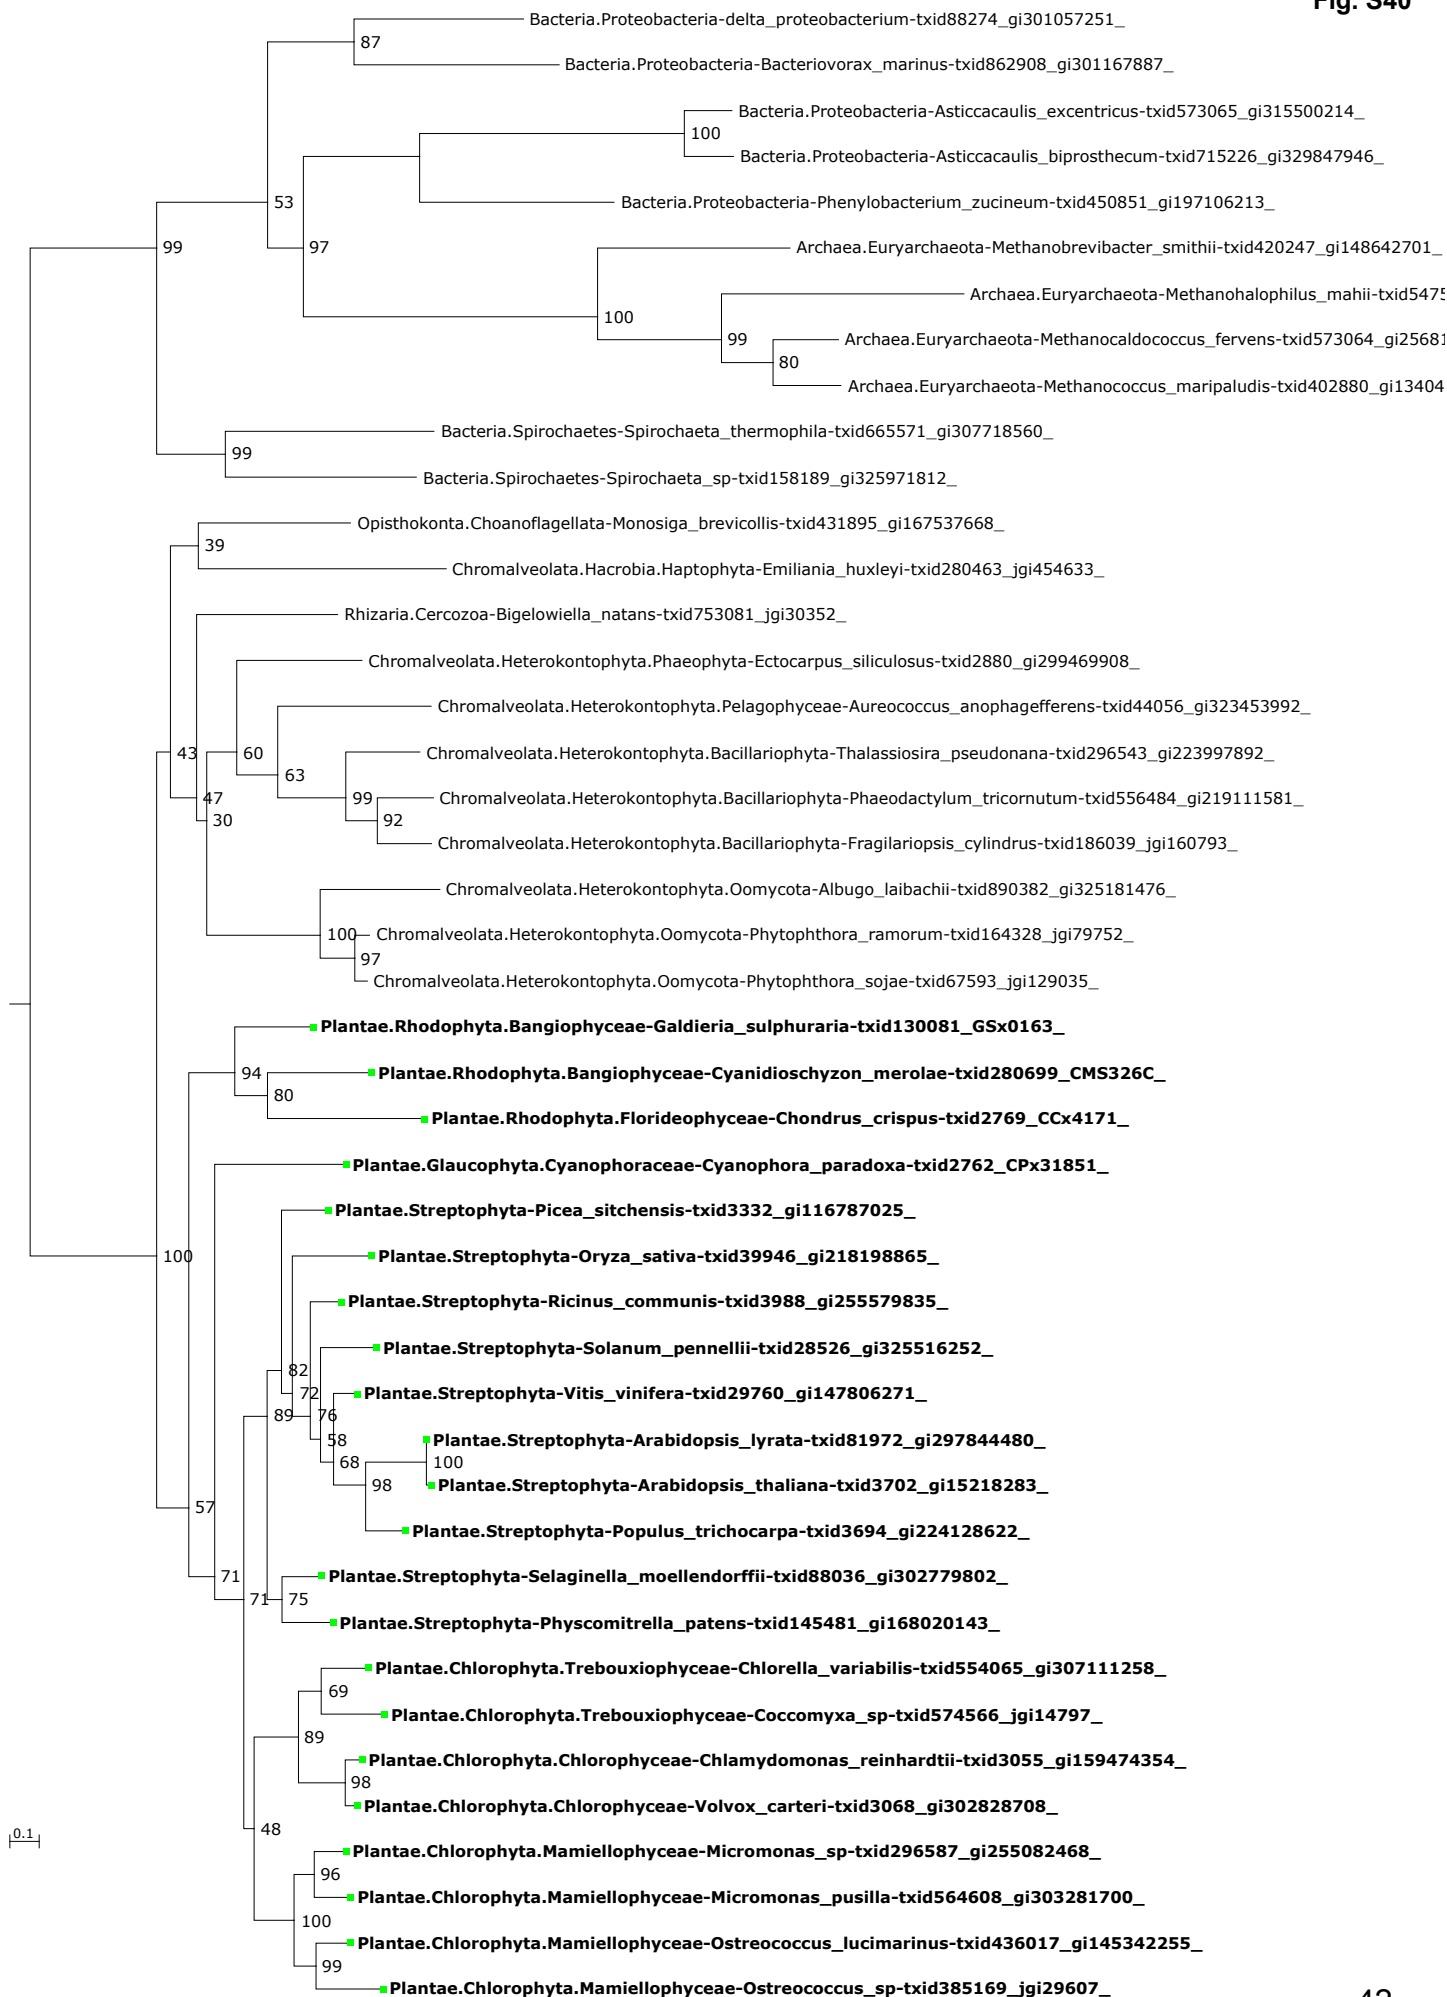

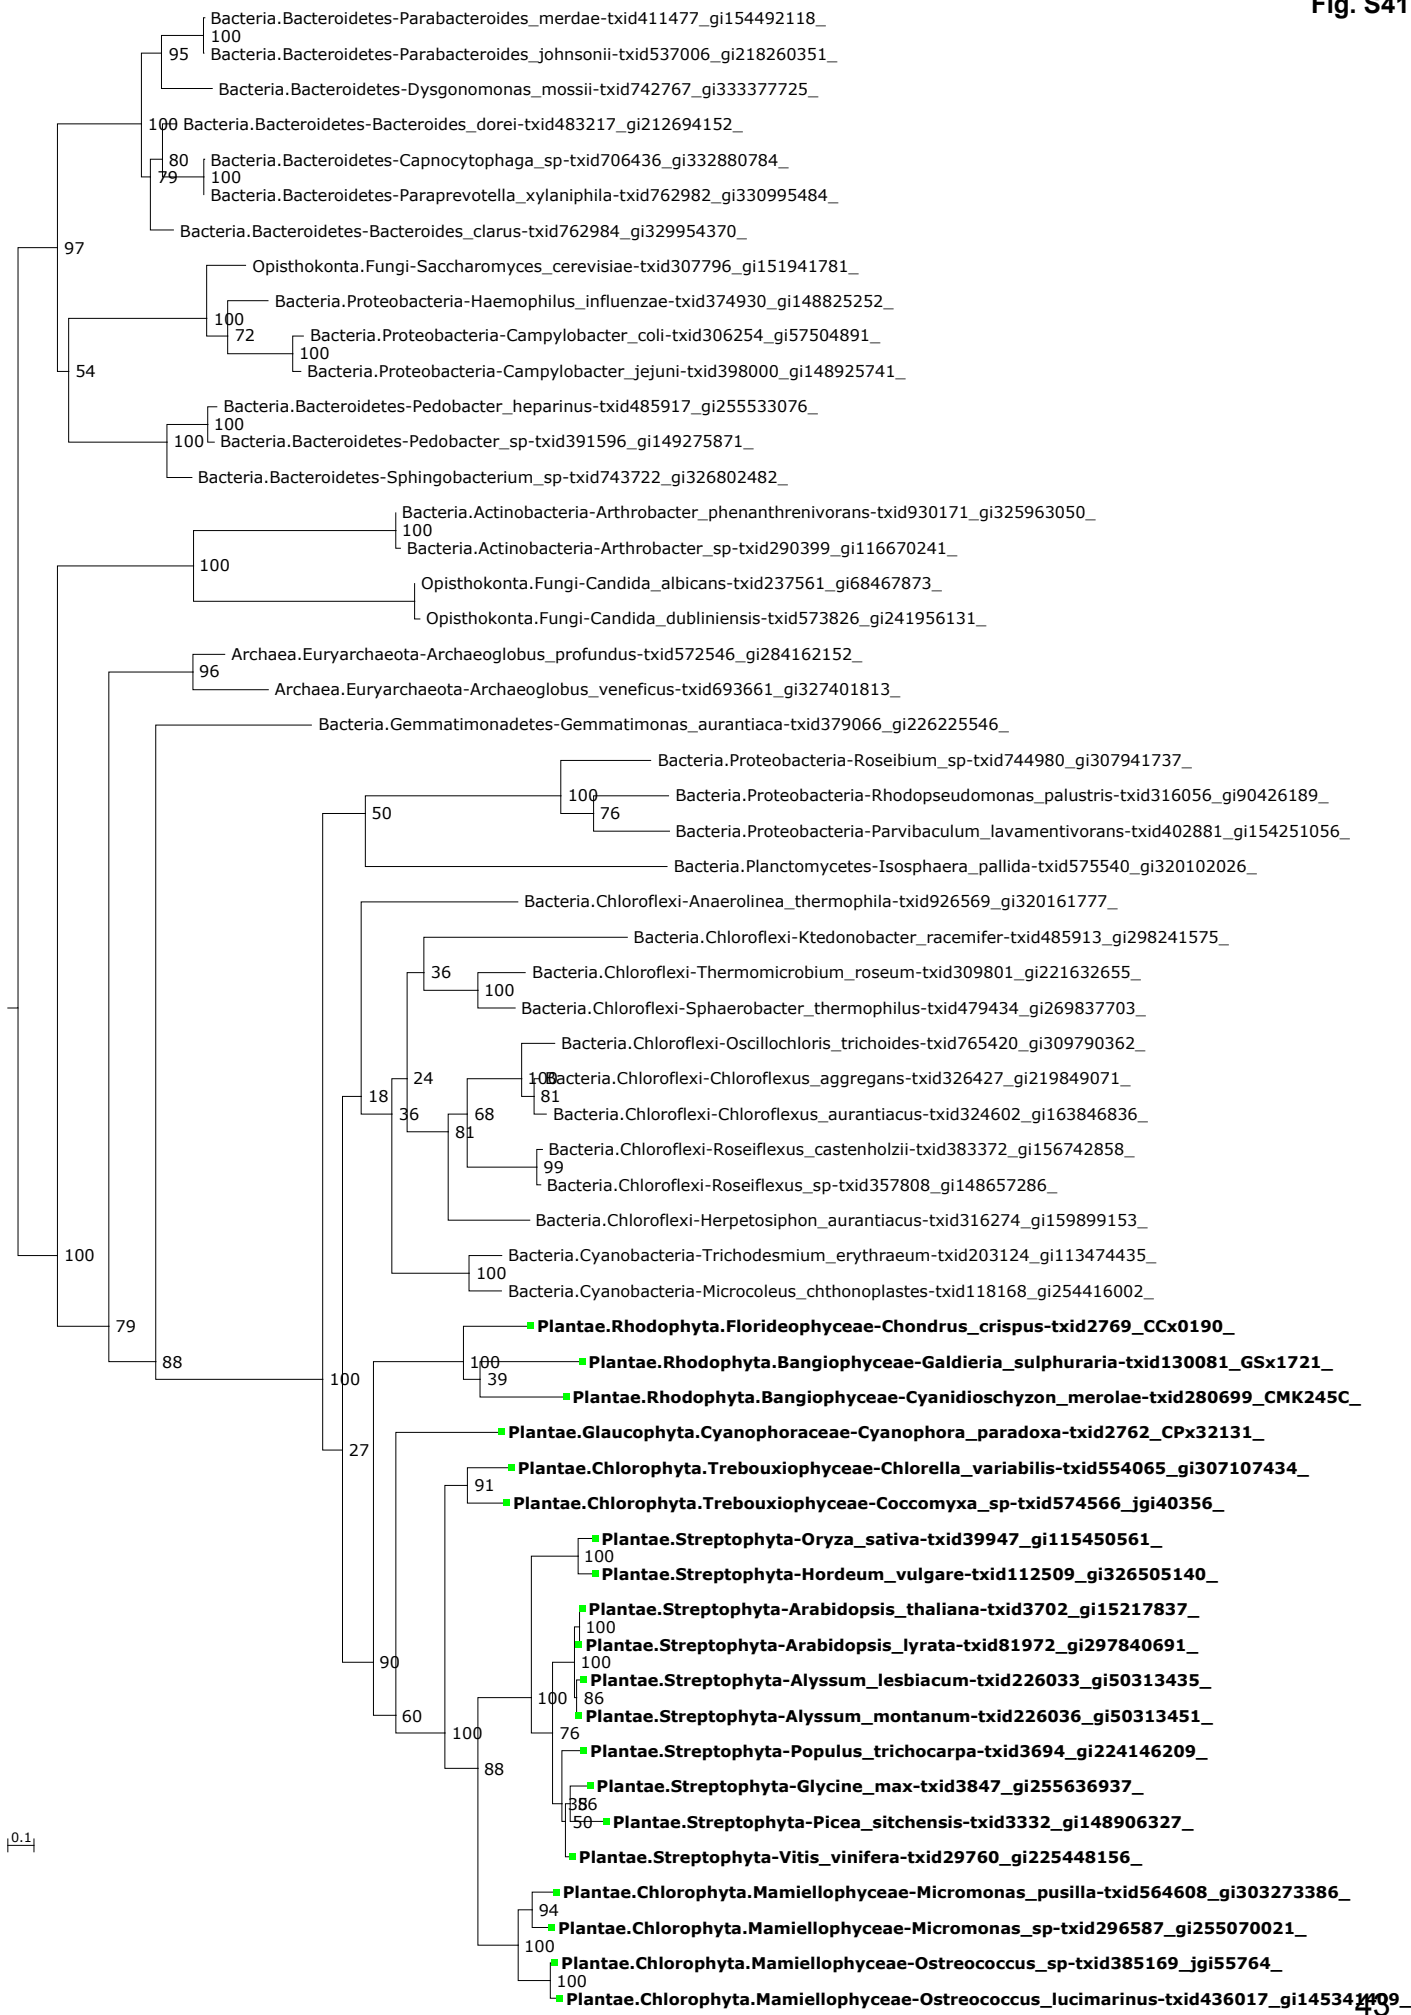

0.1

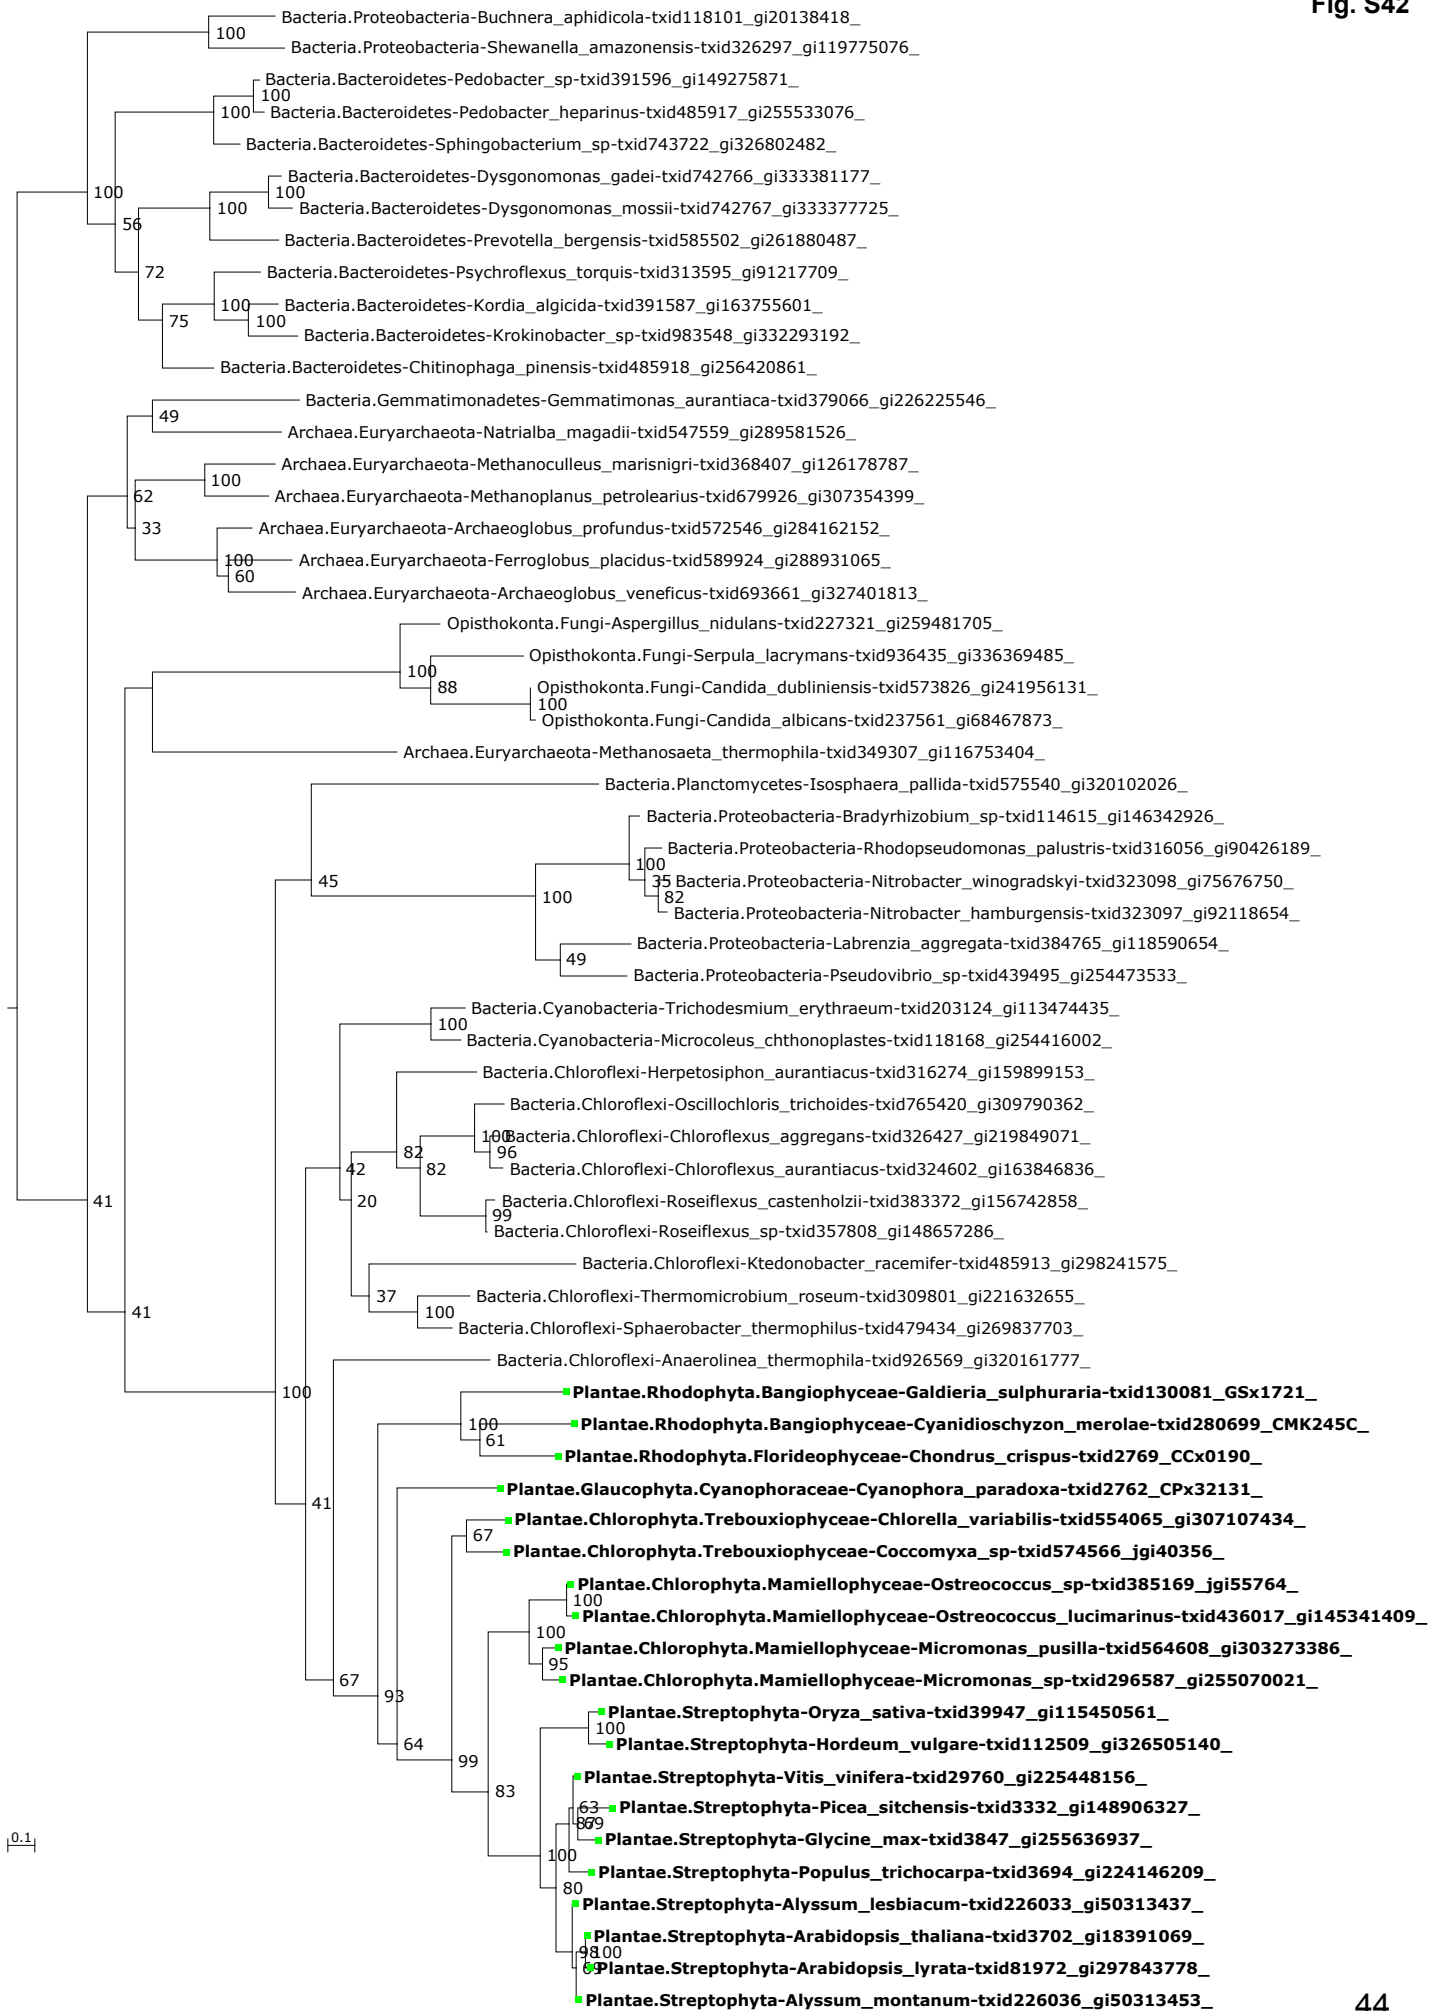

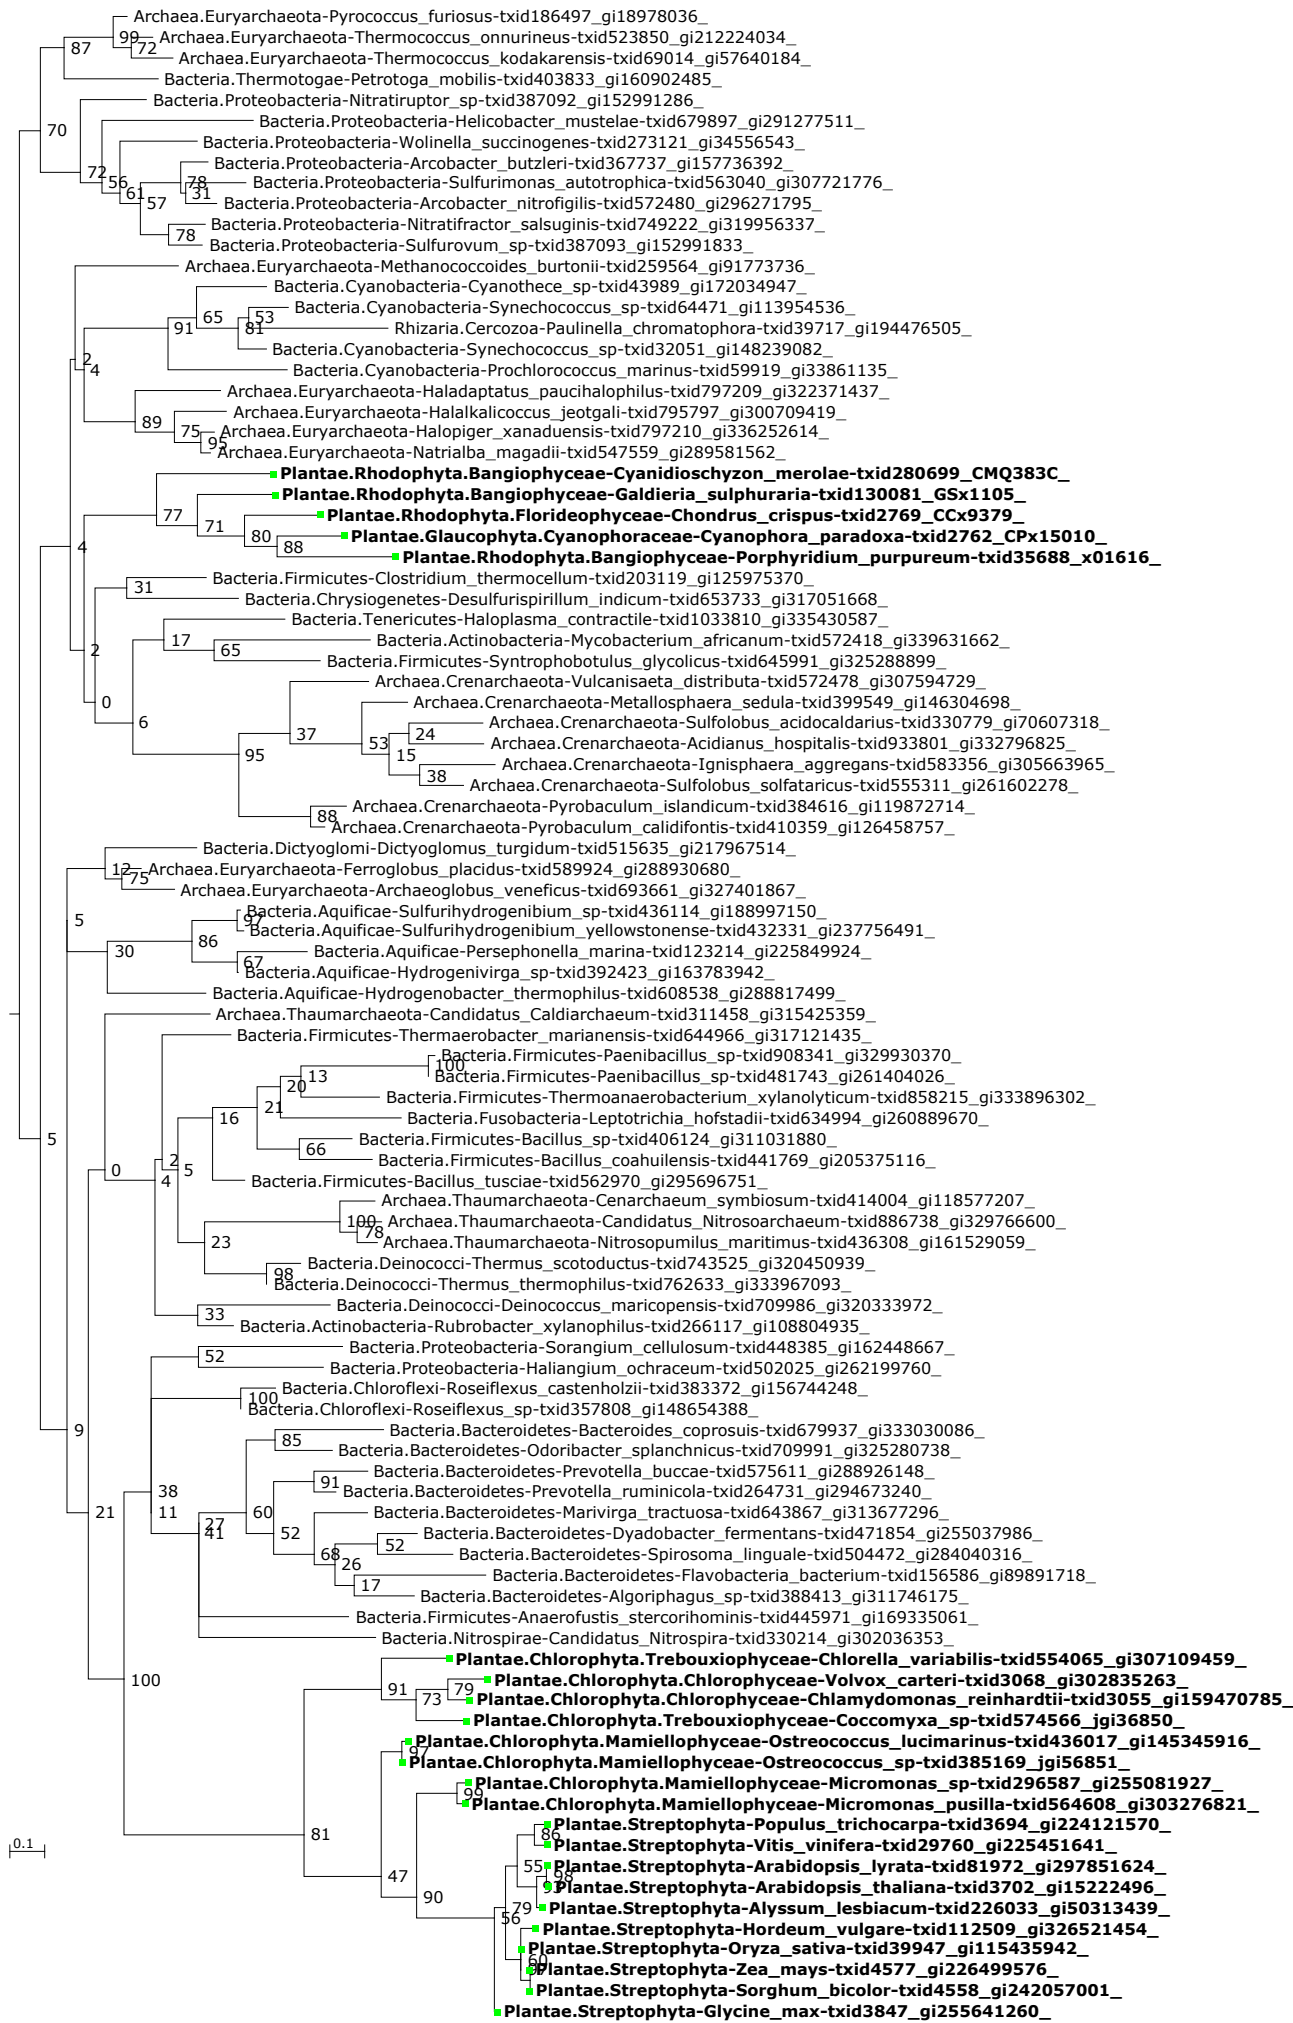

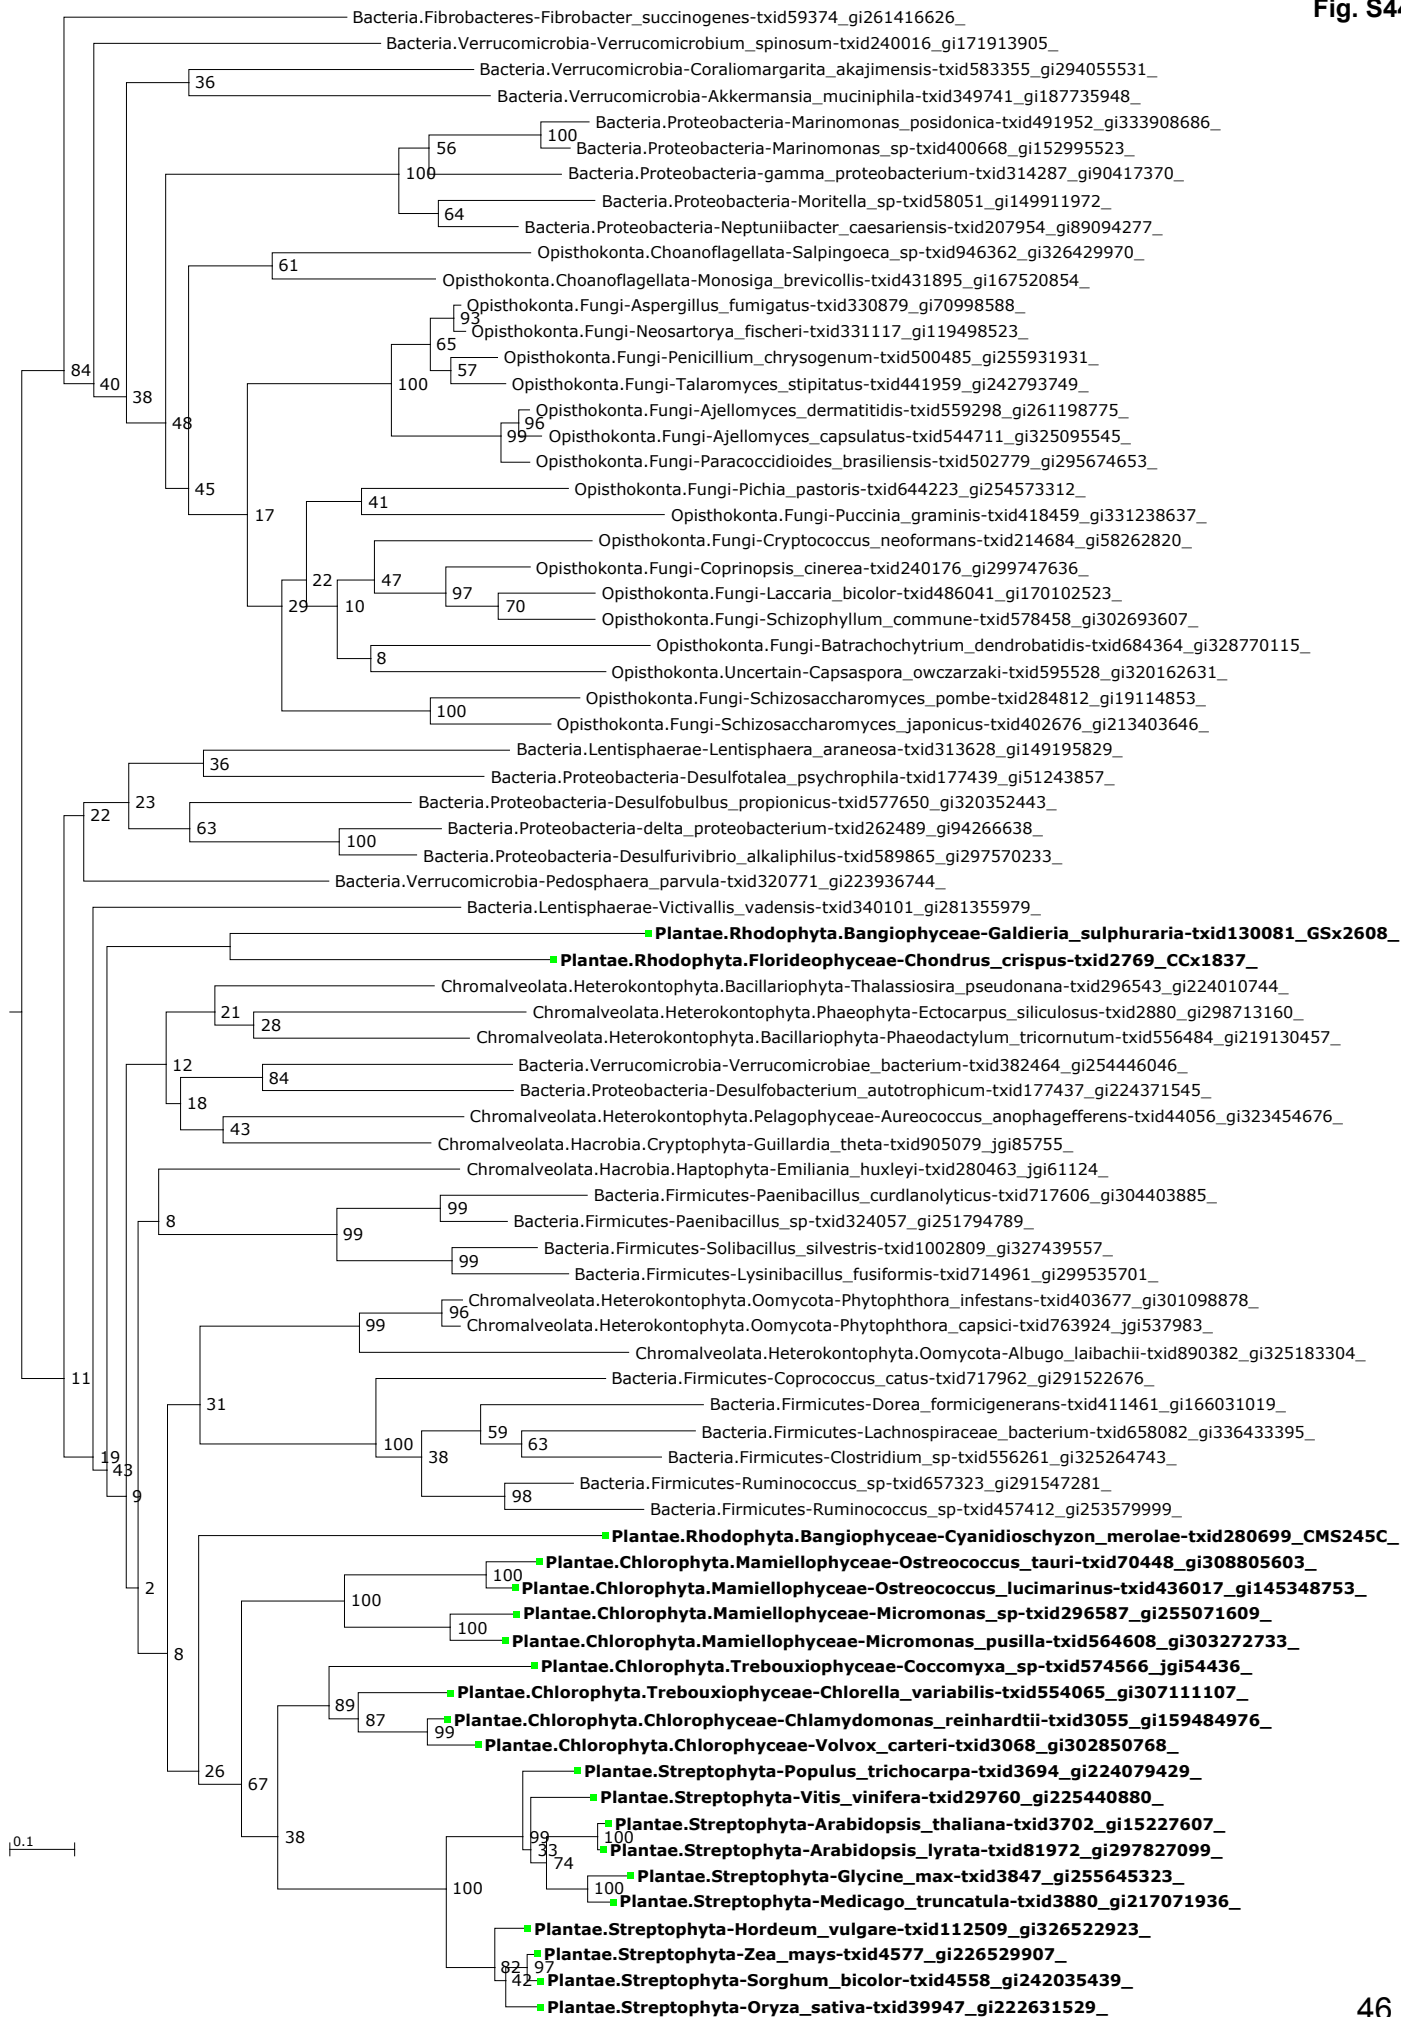

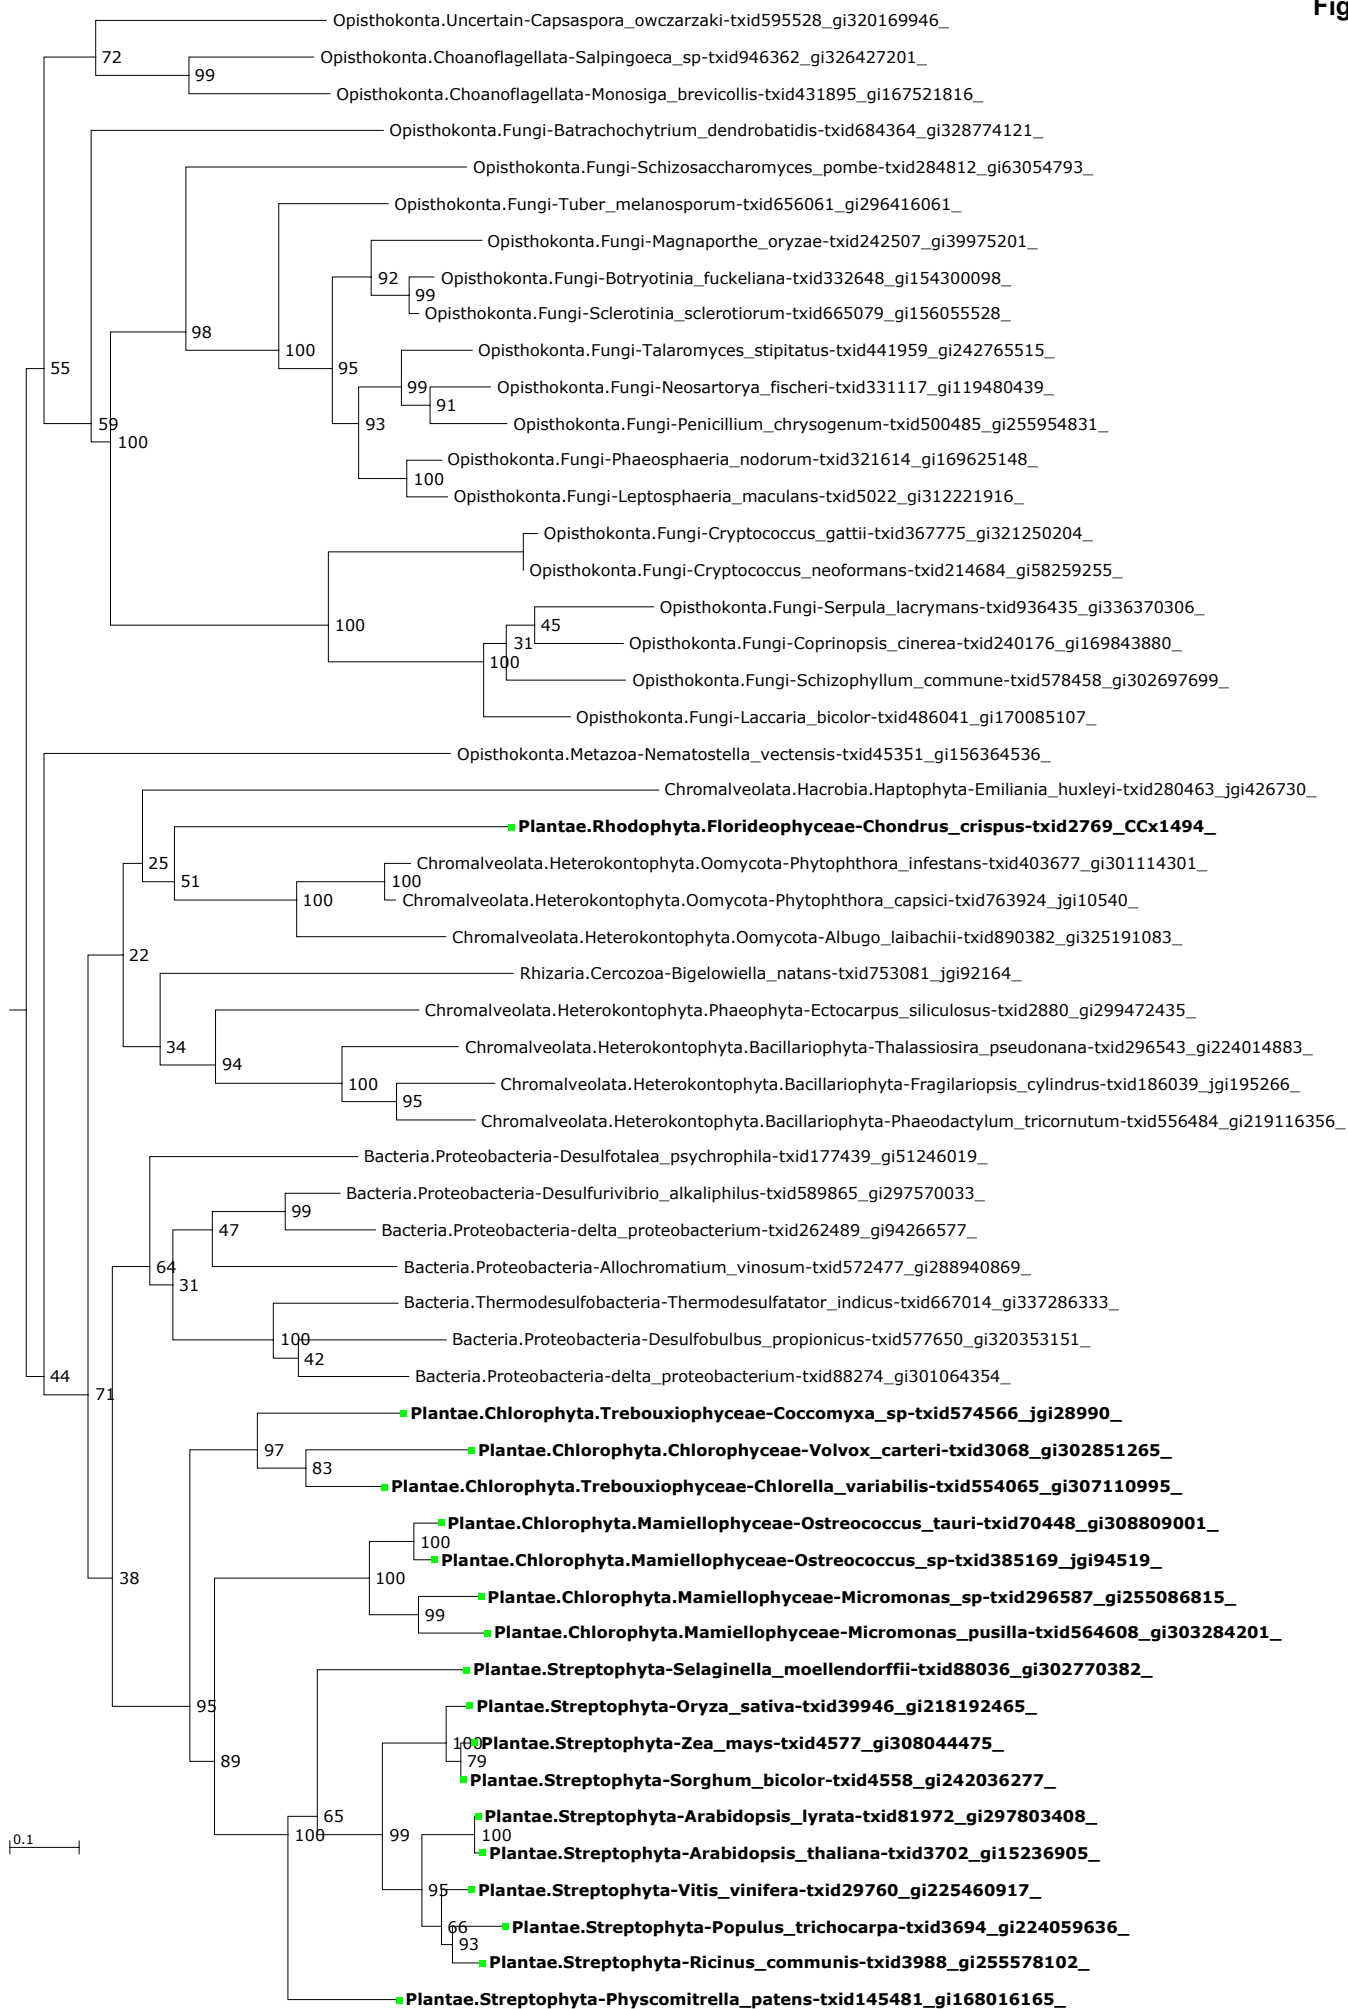

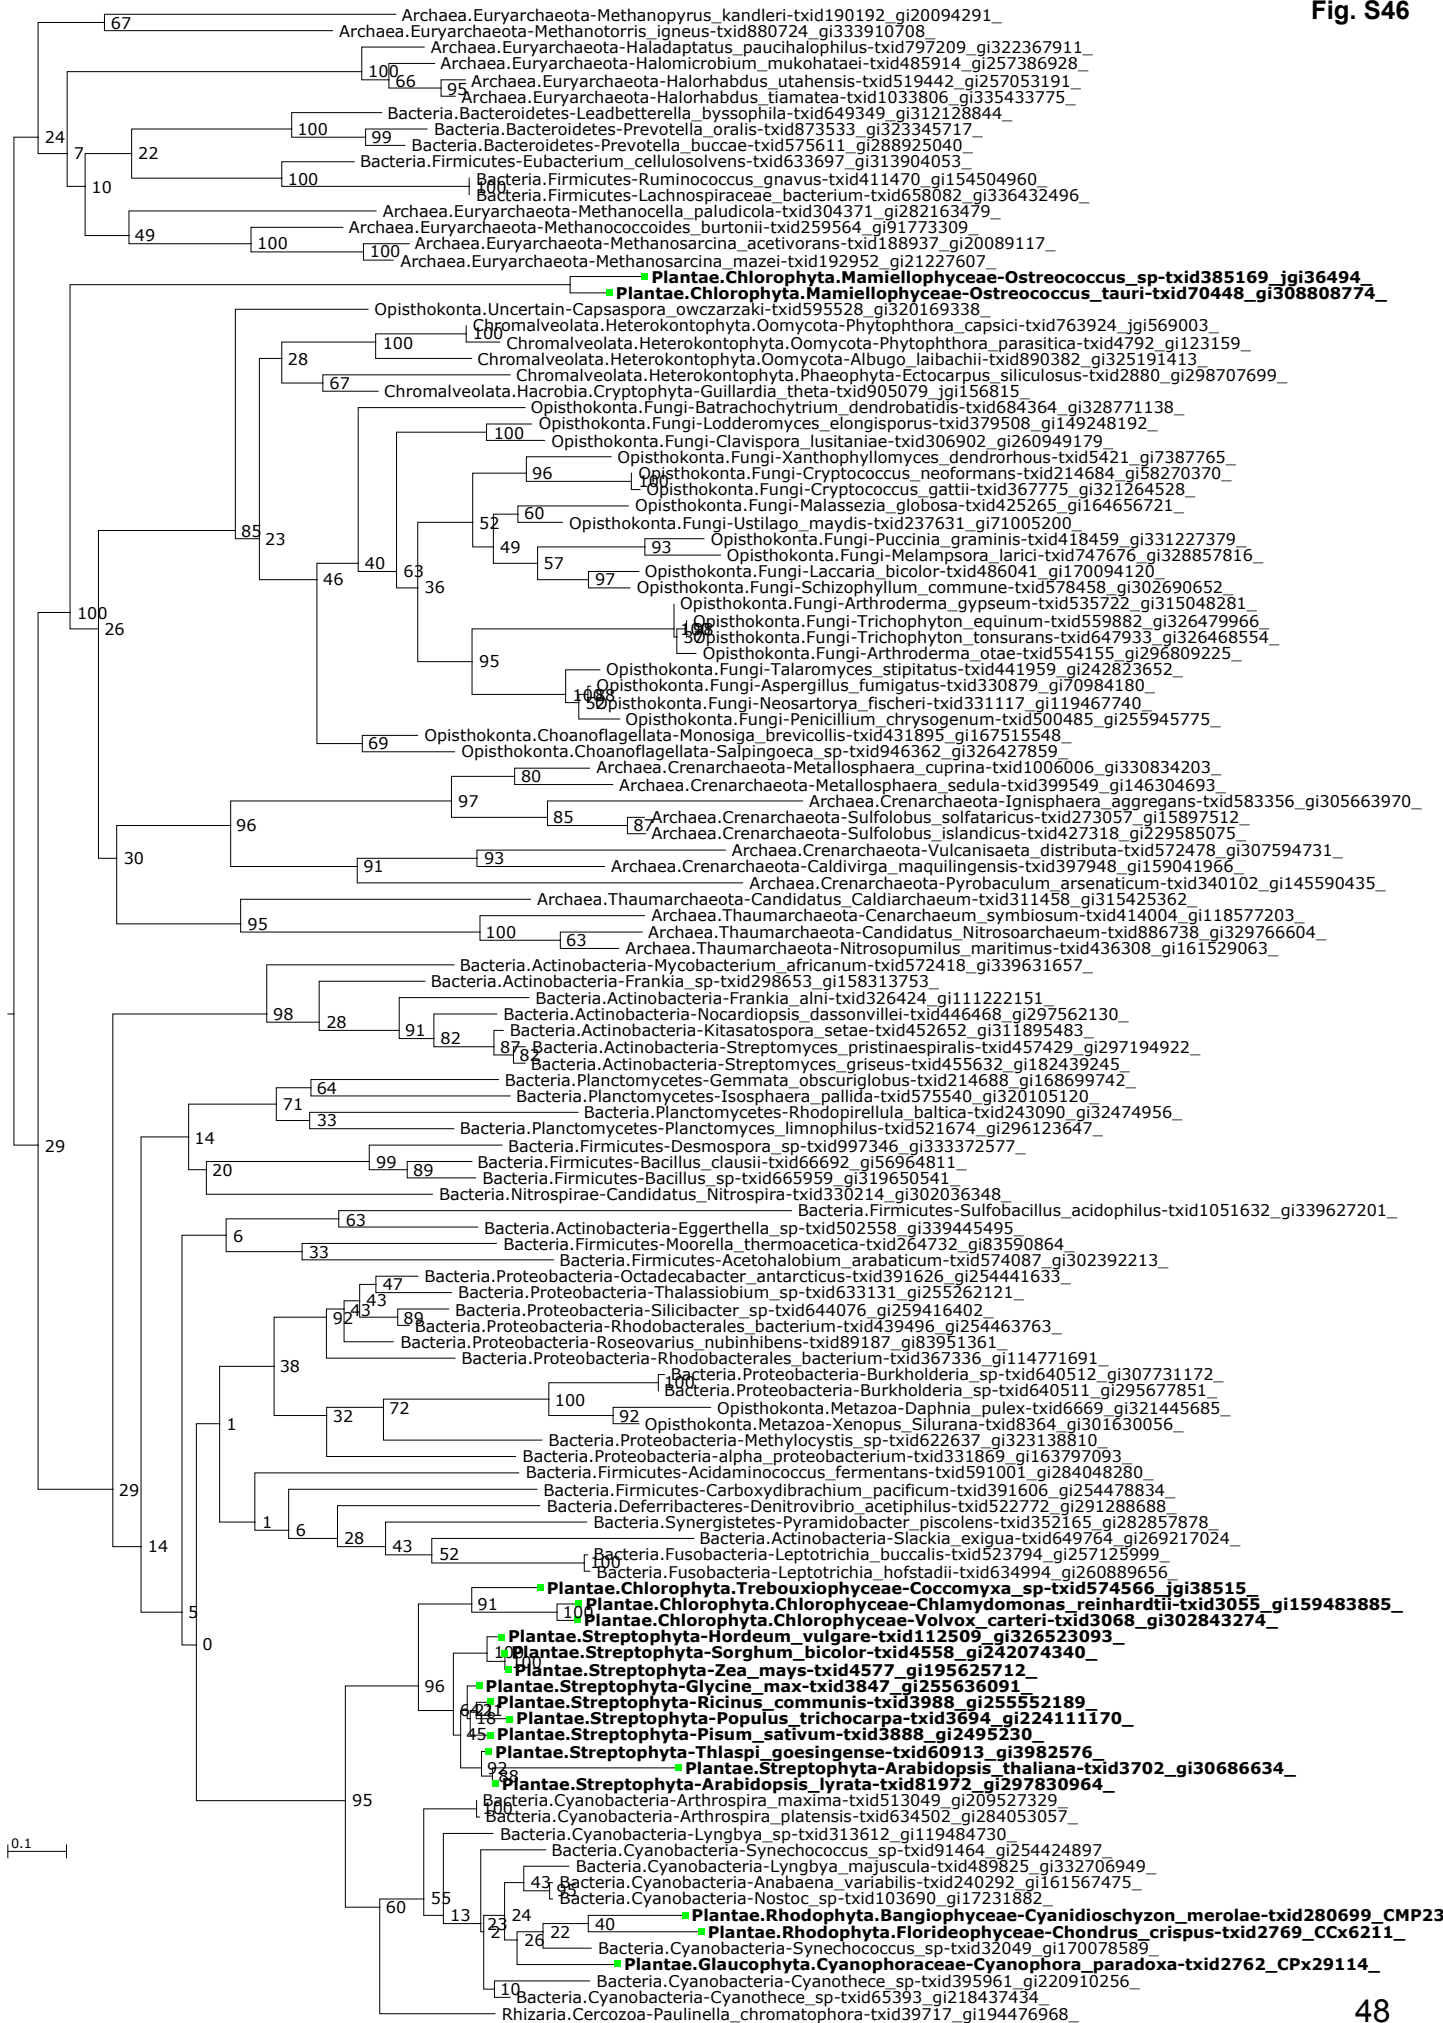



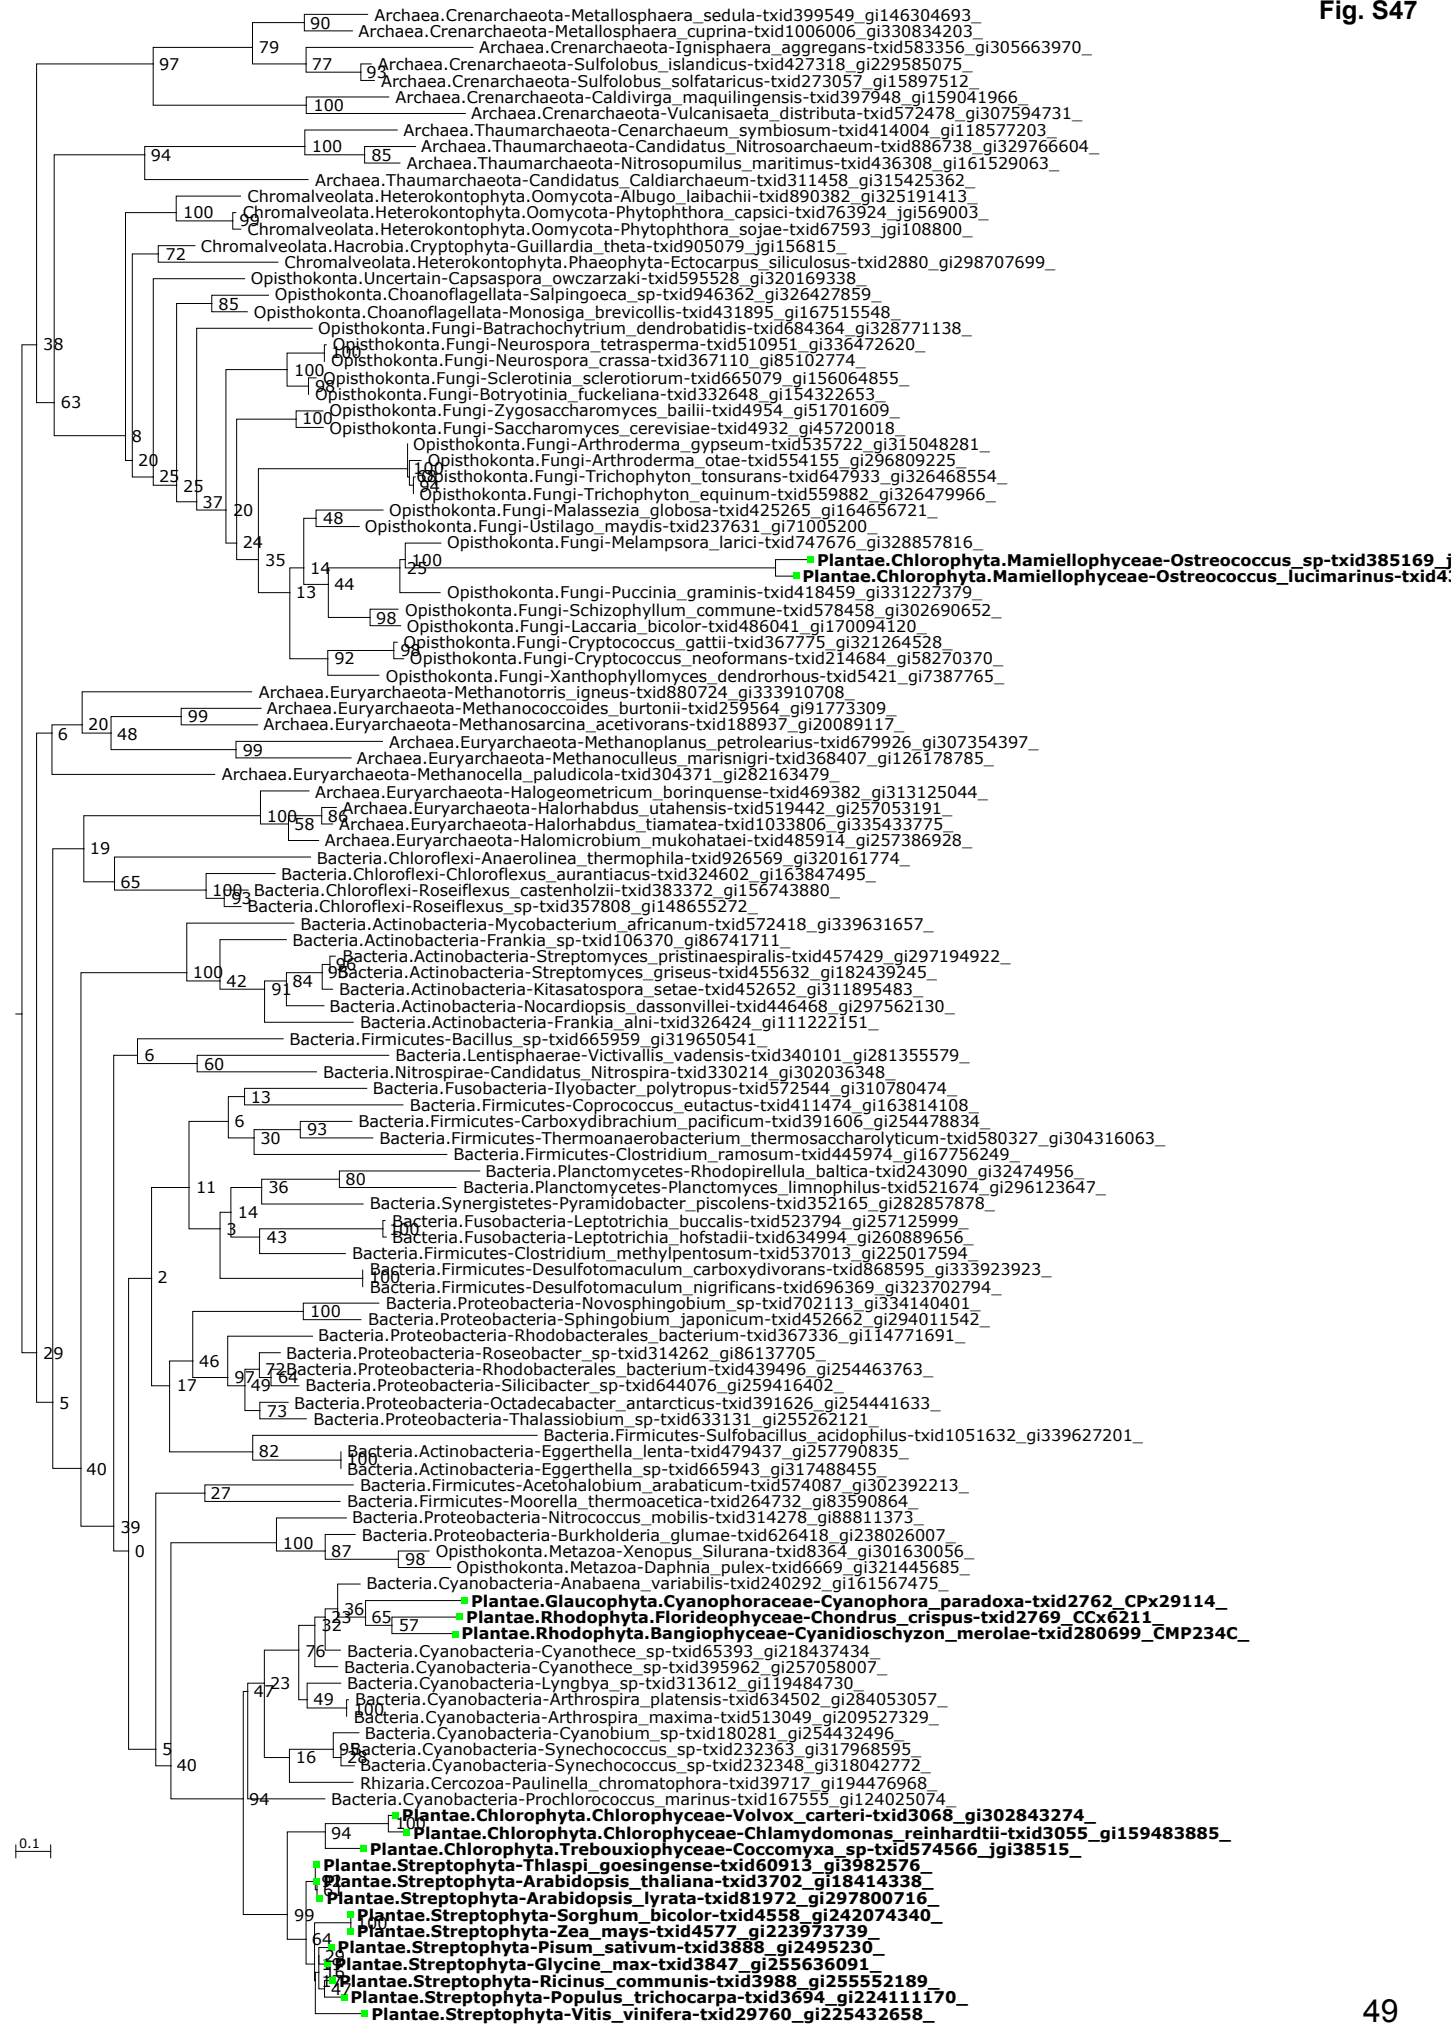

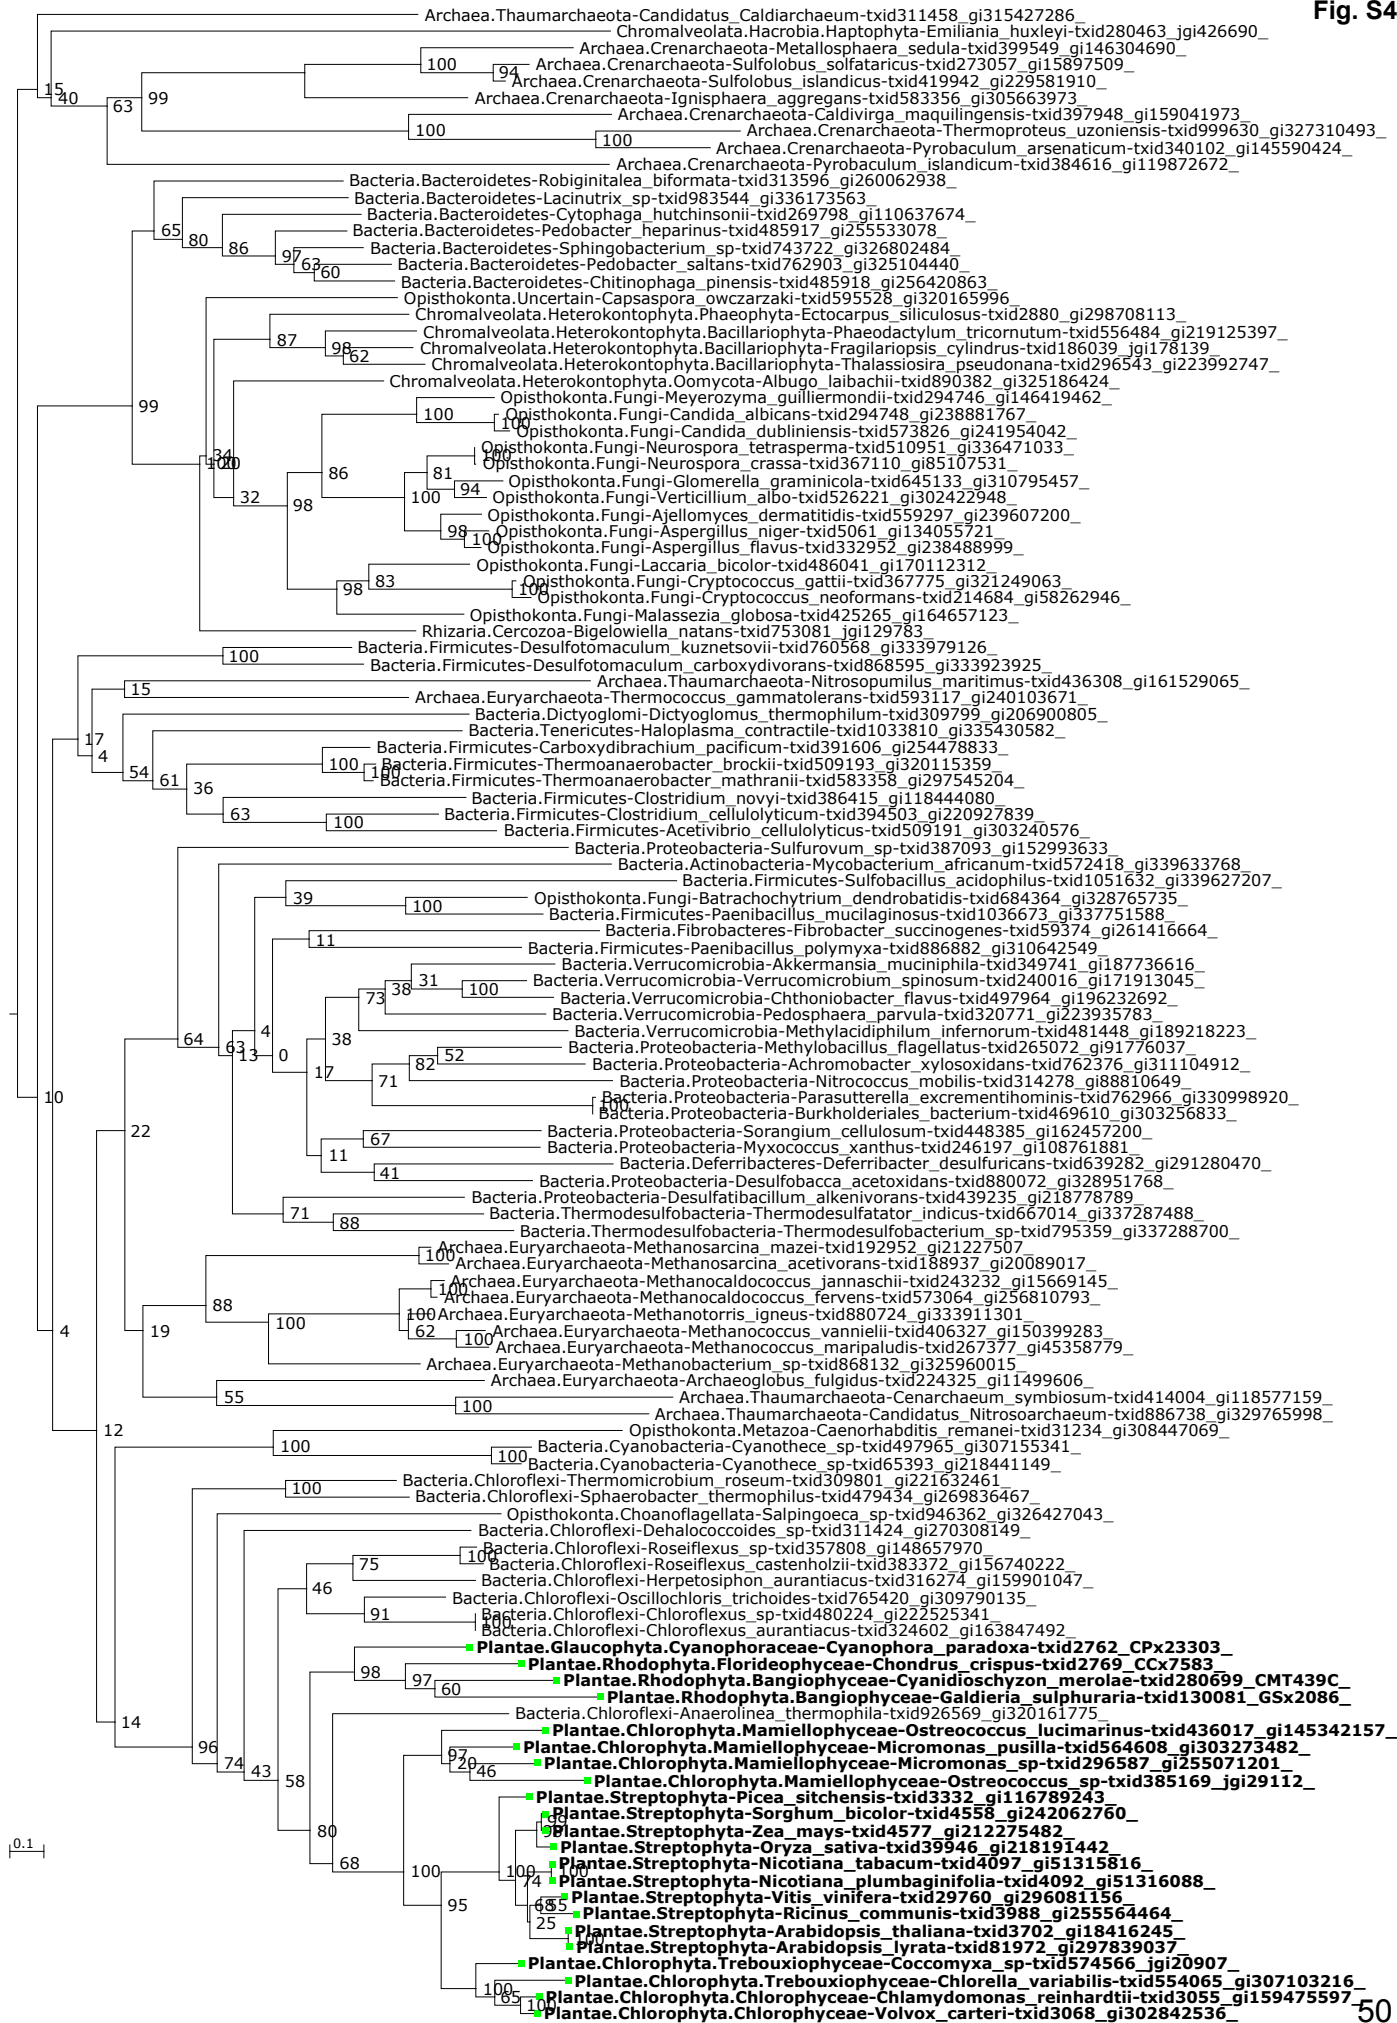

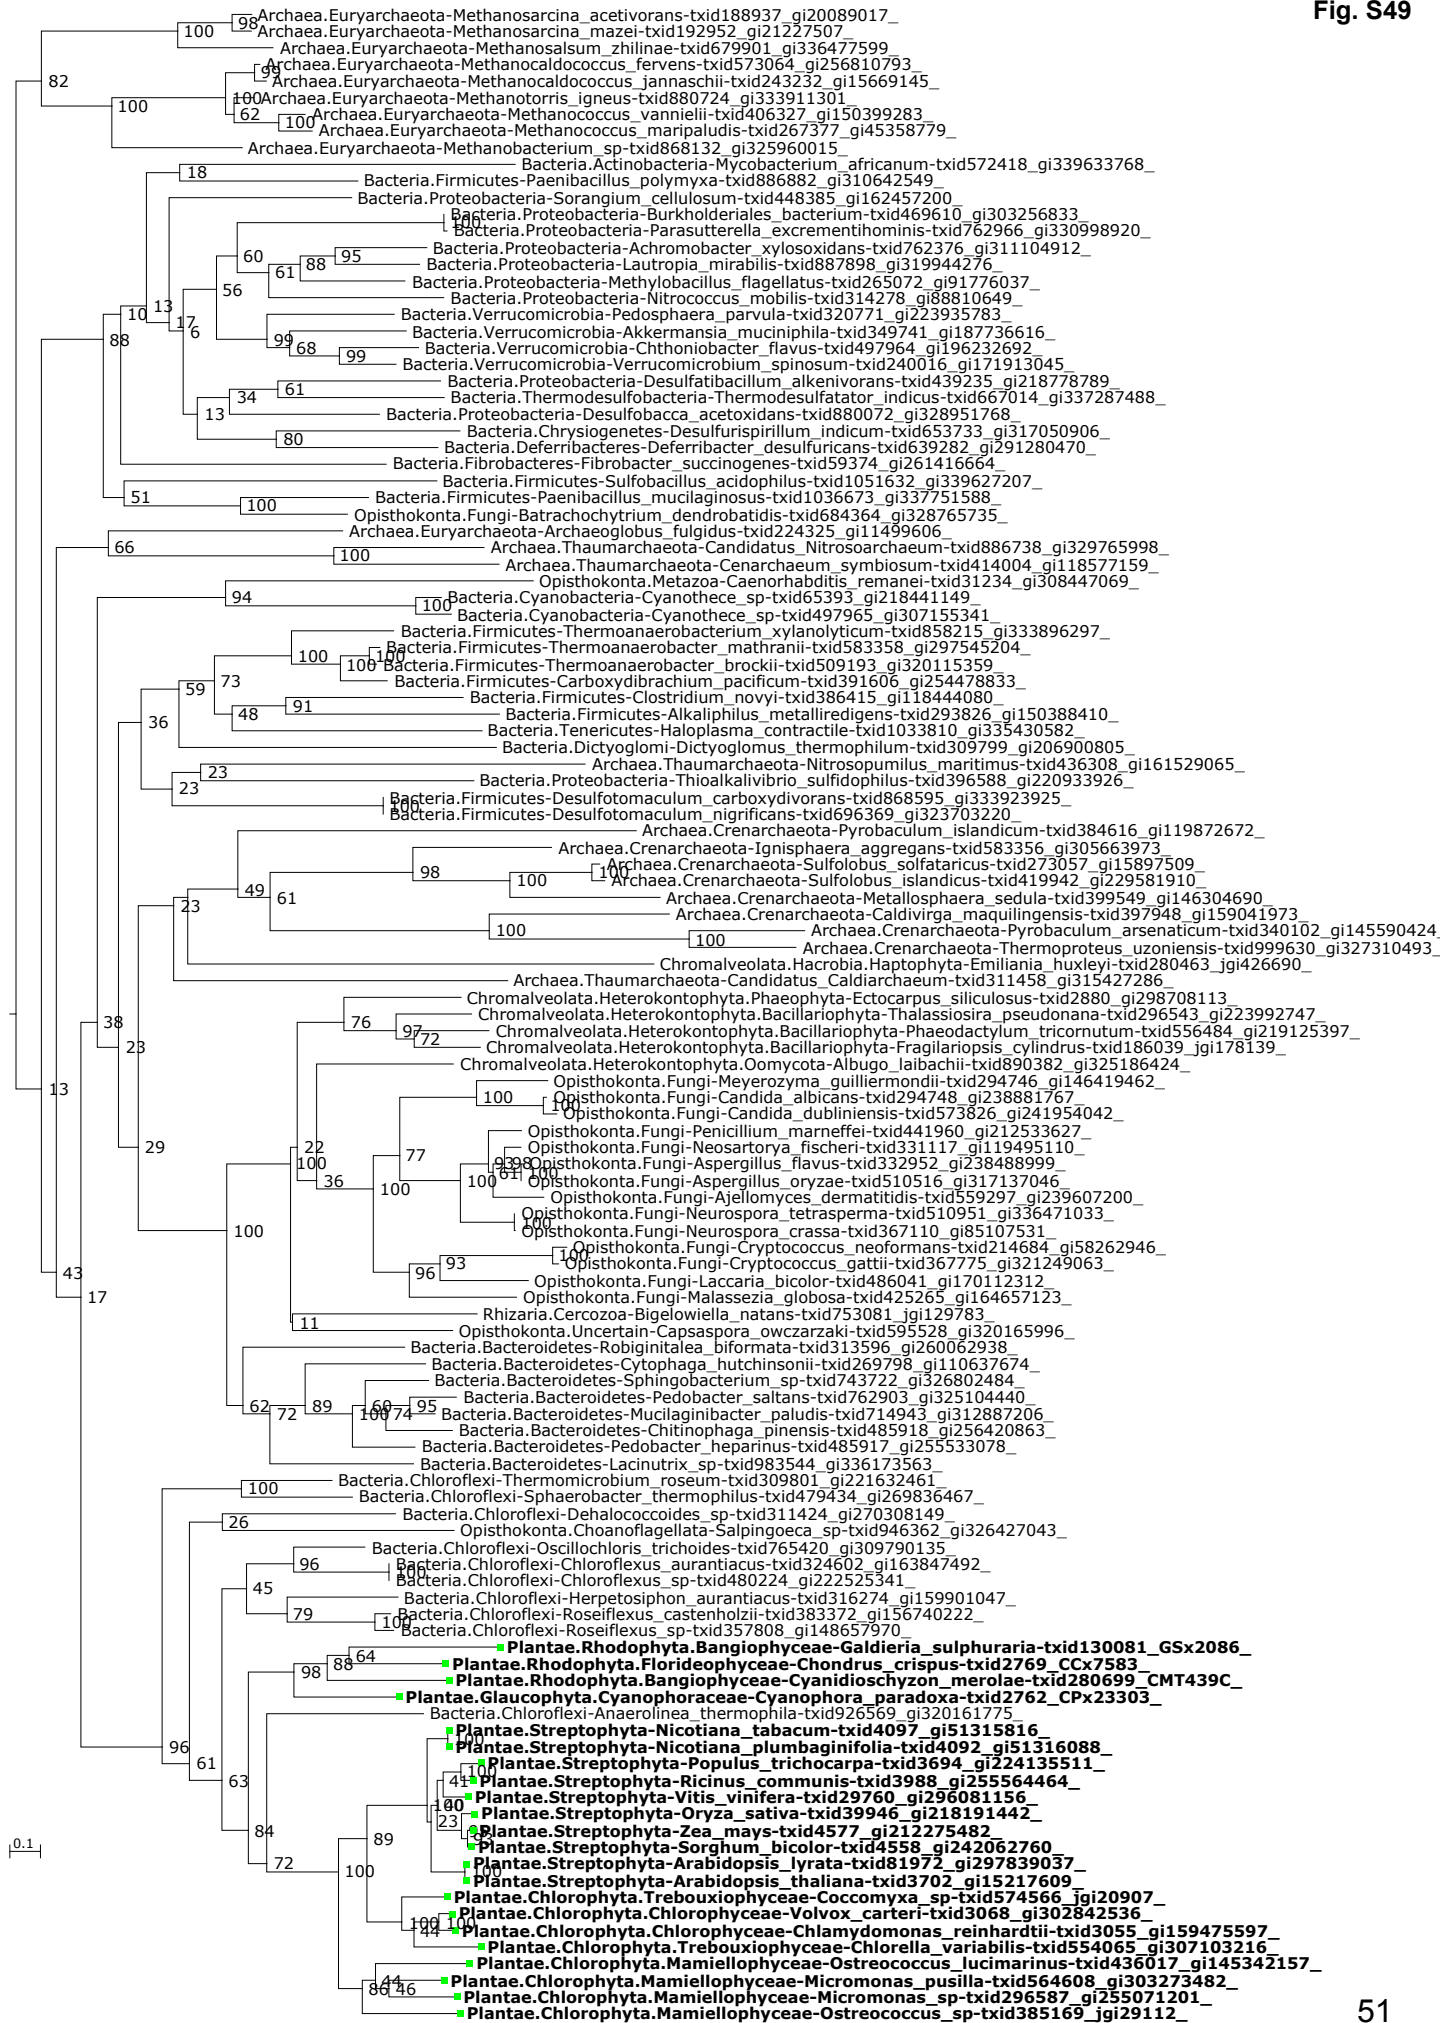

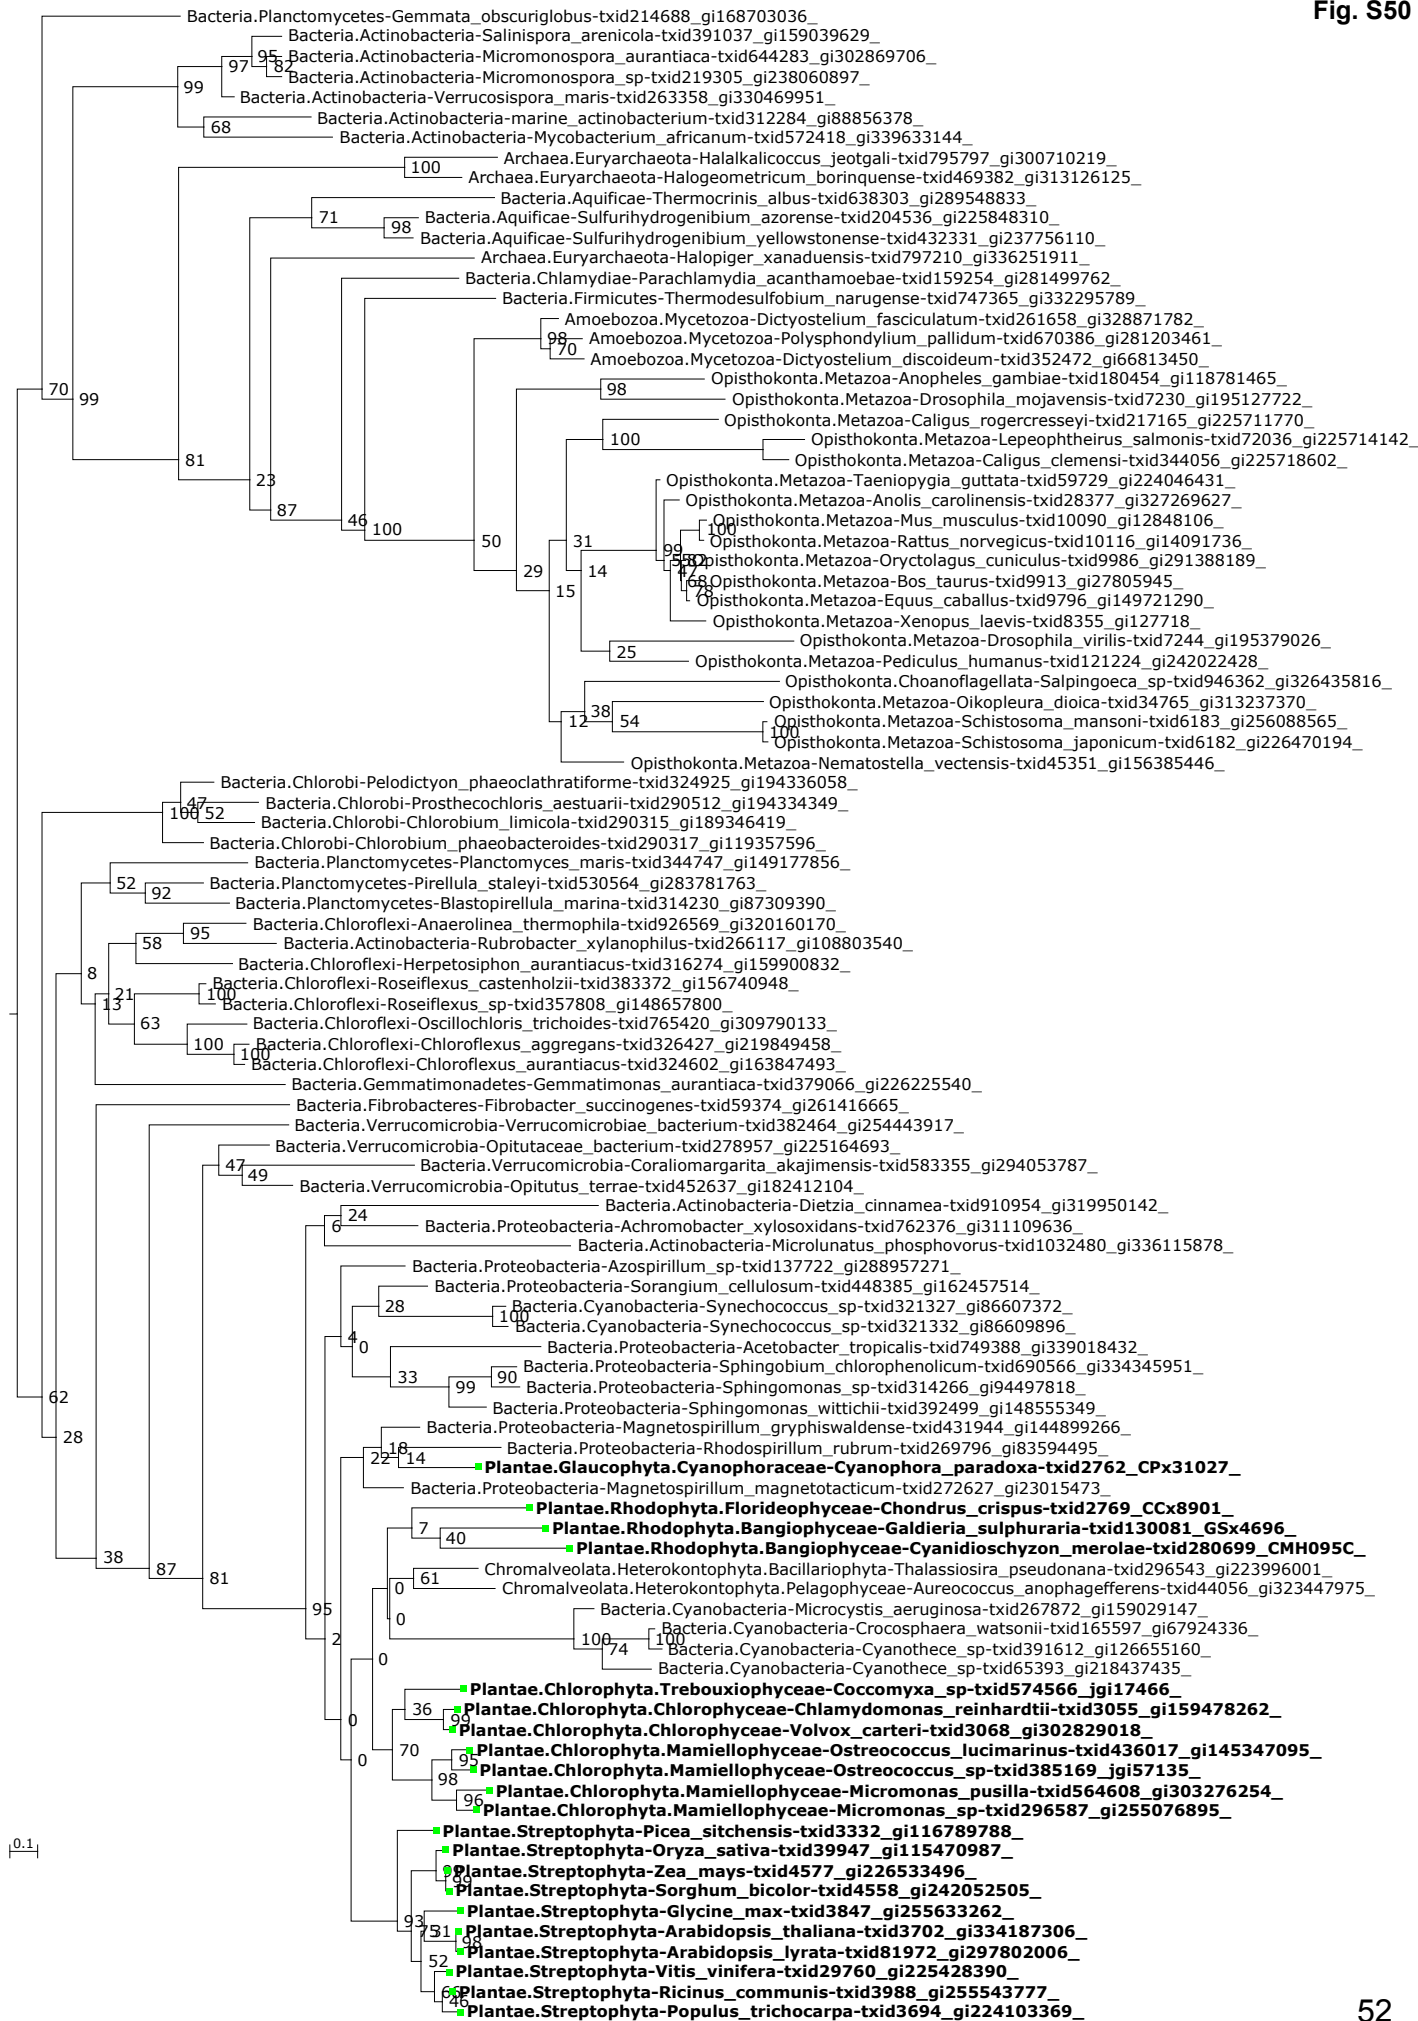

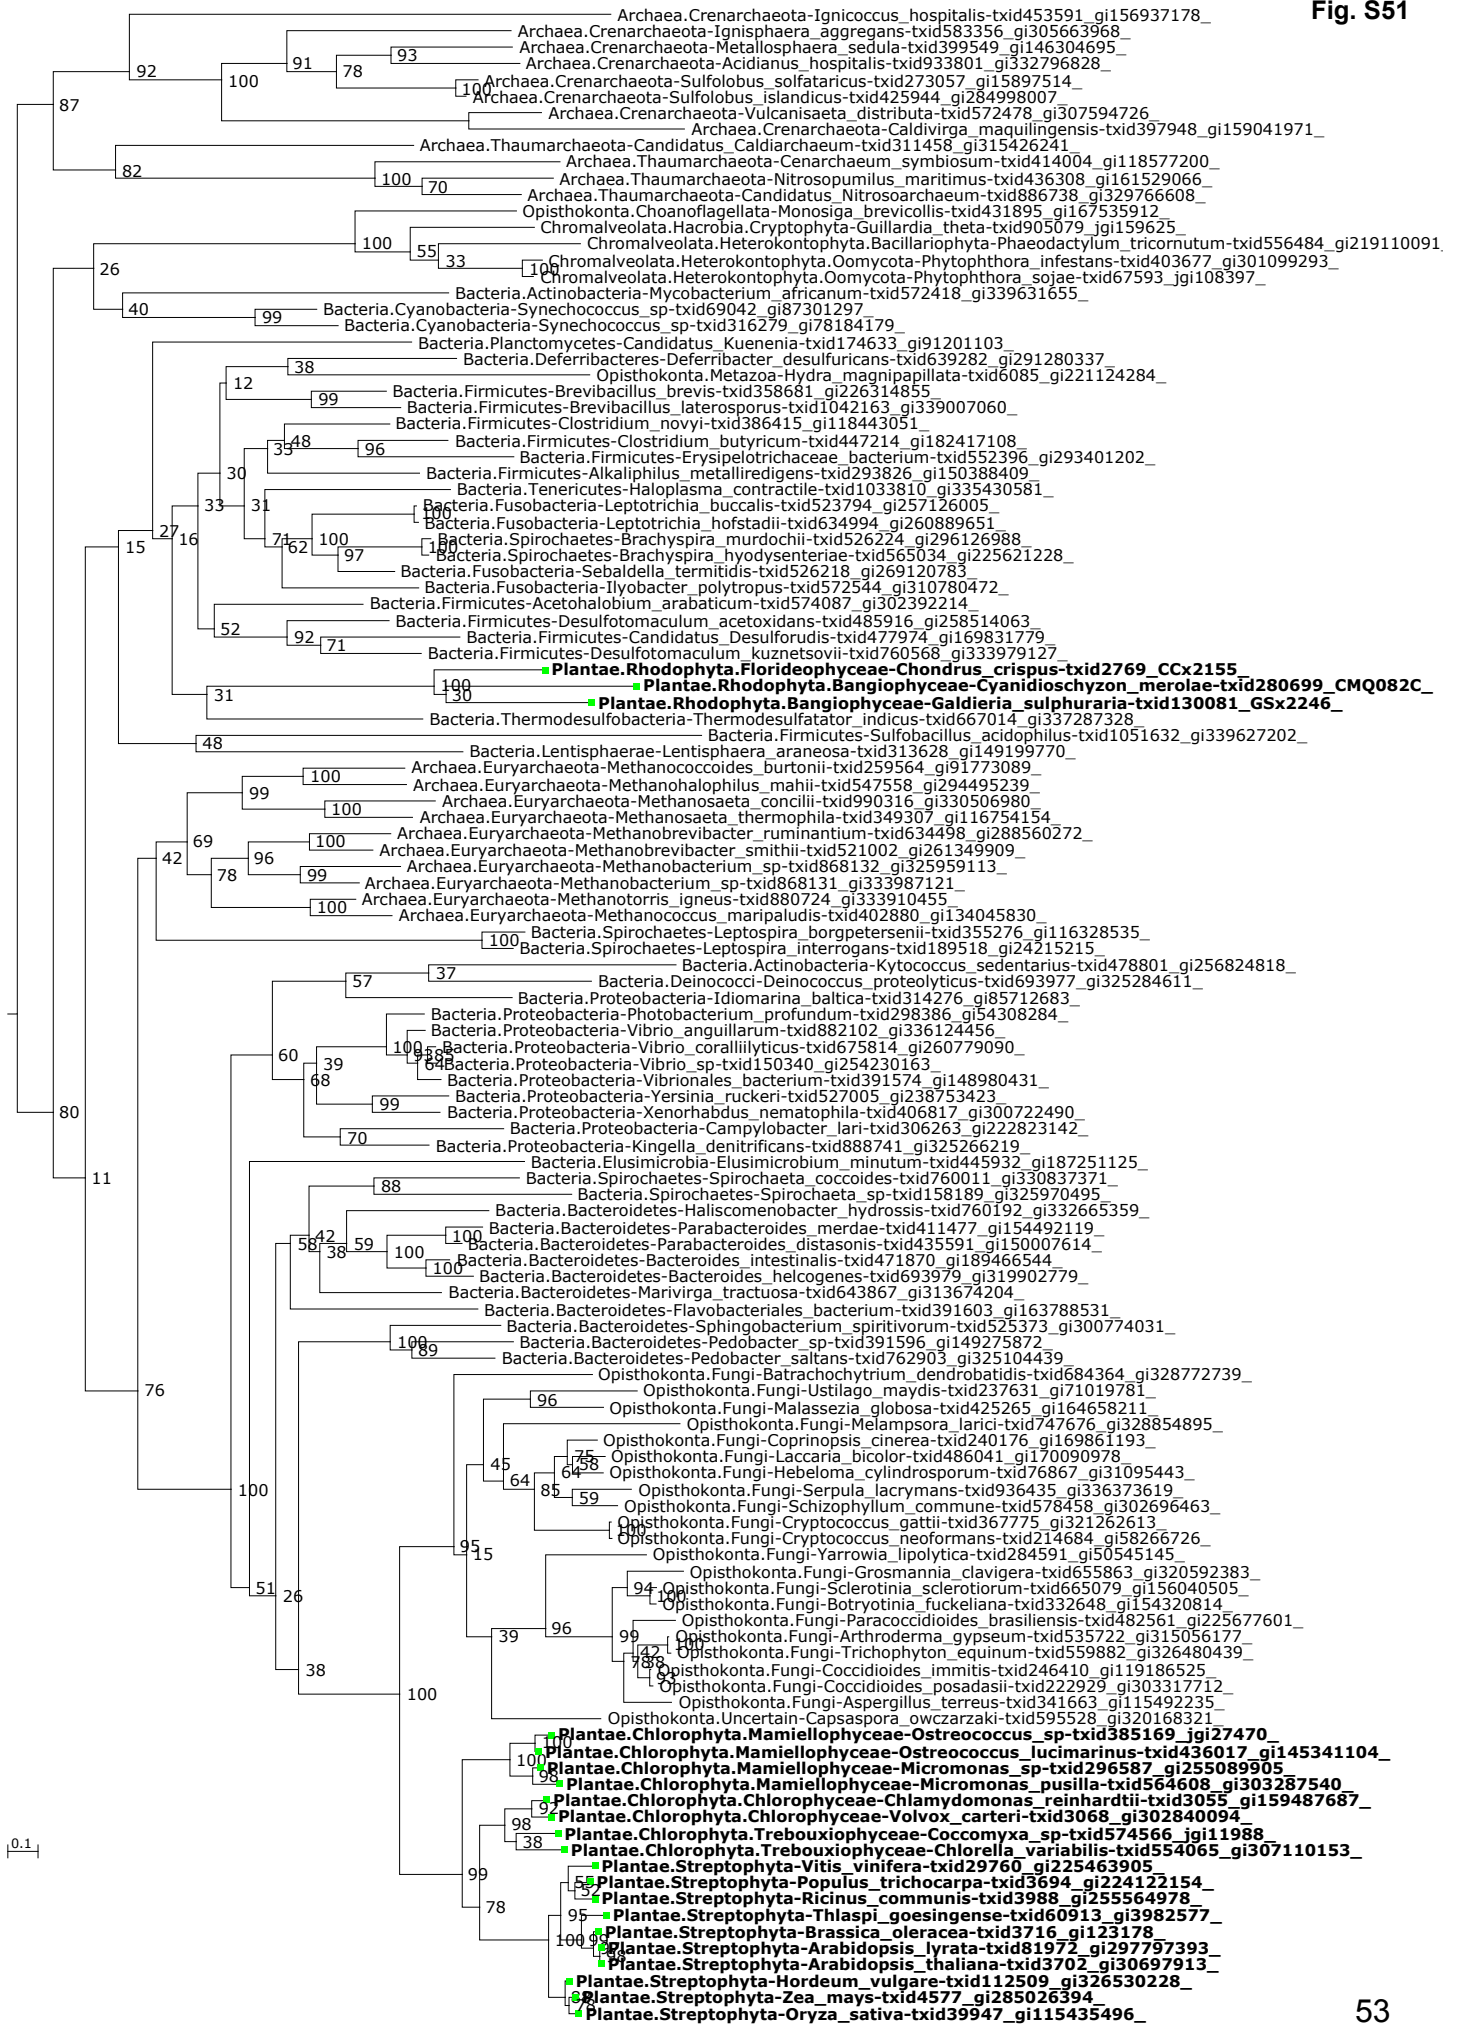

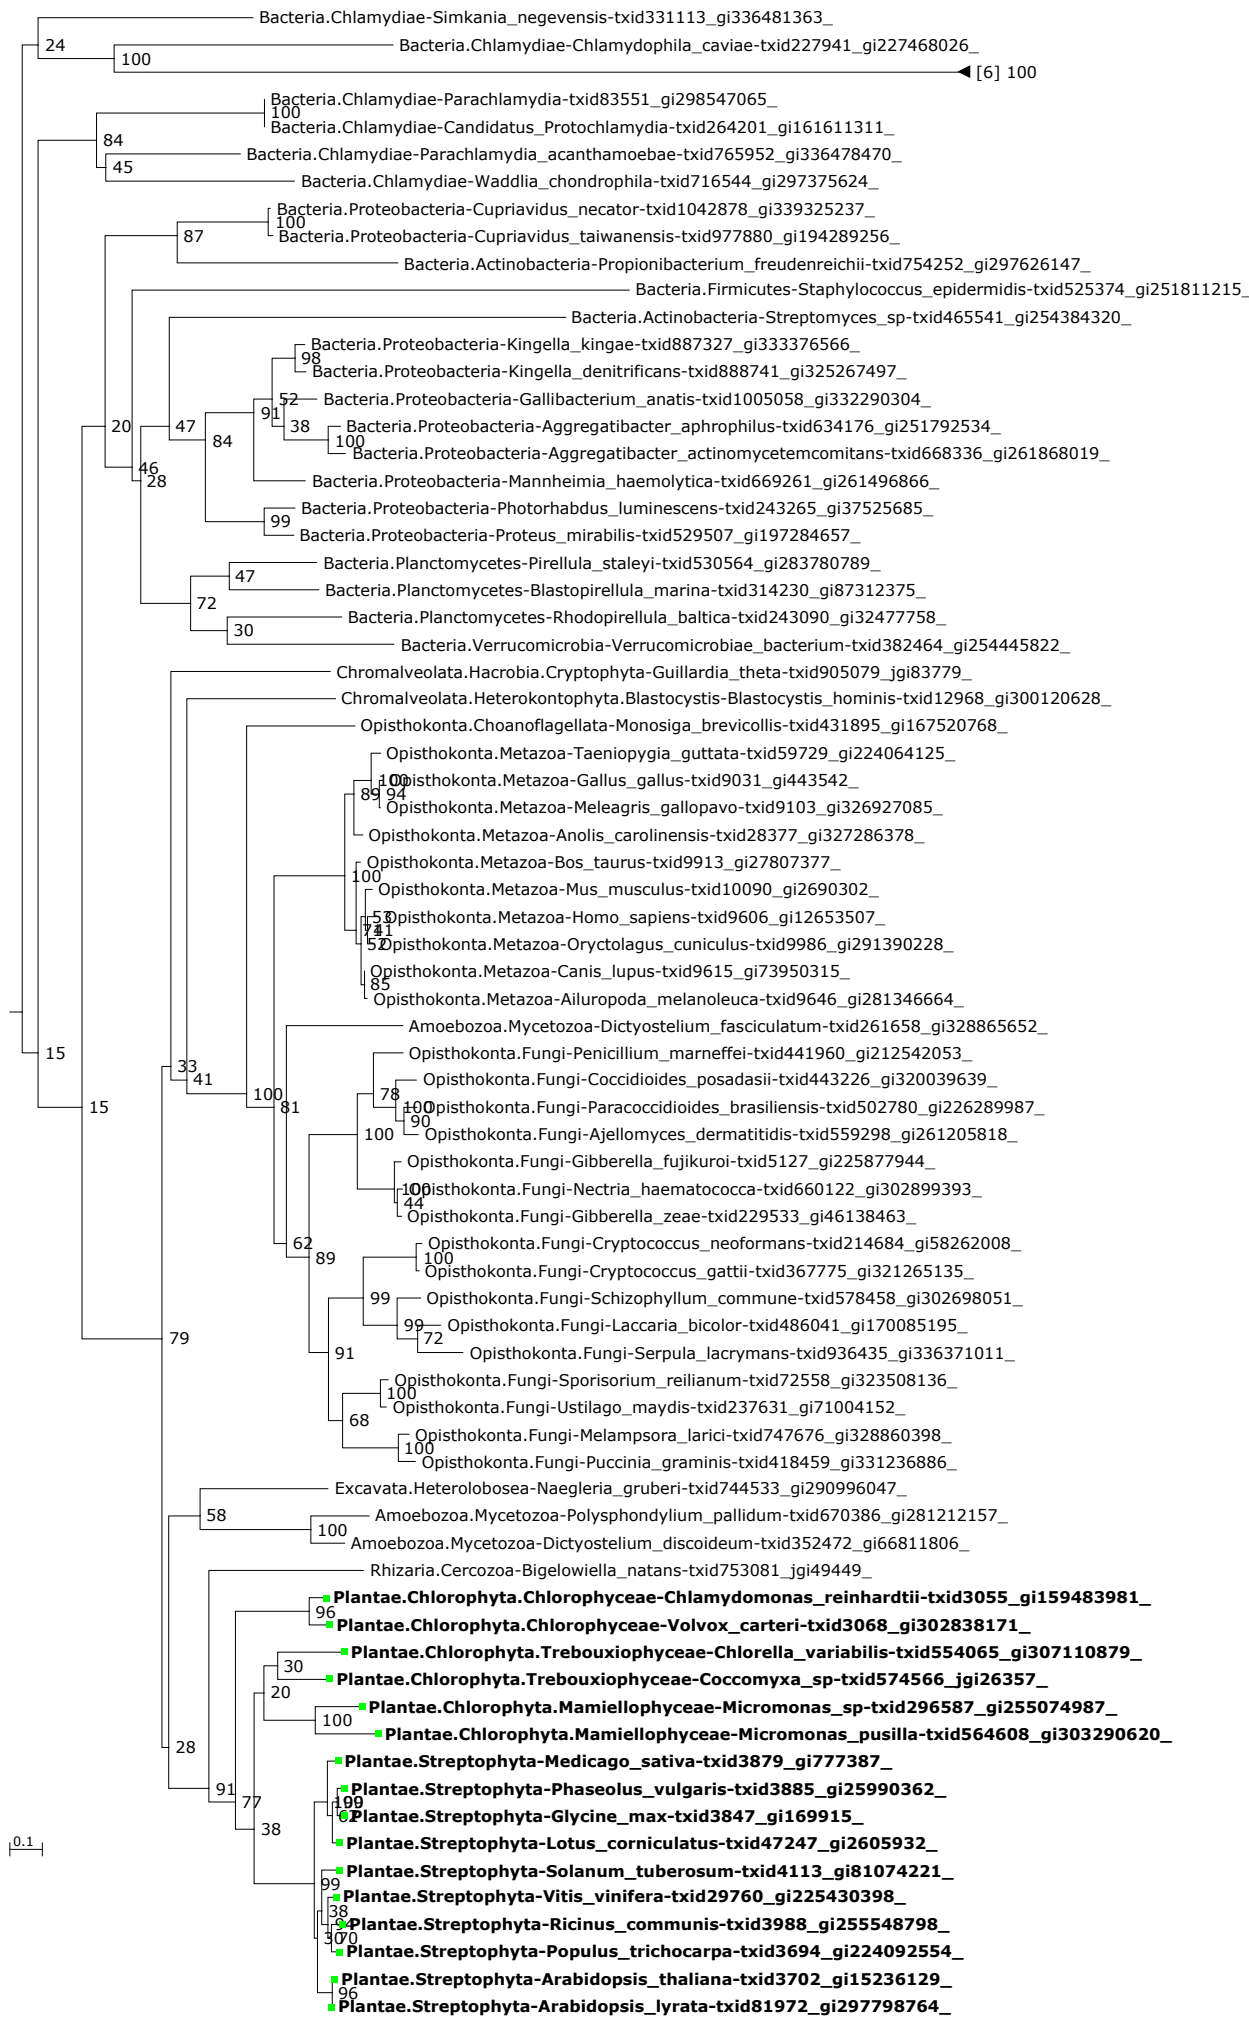

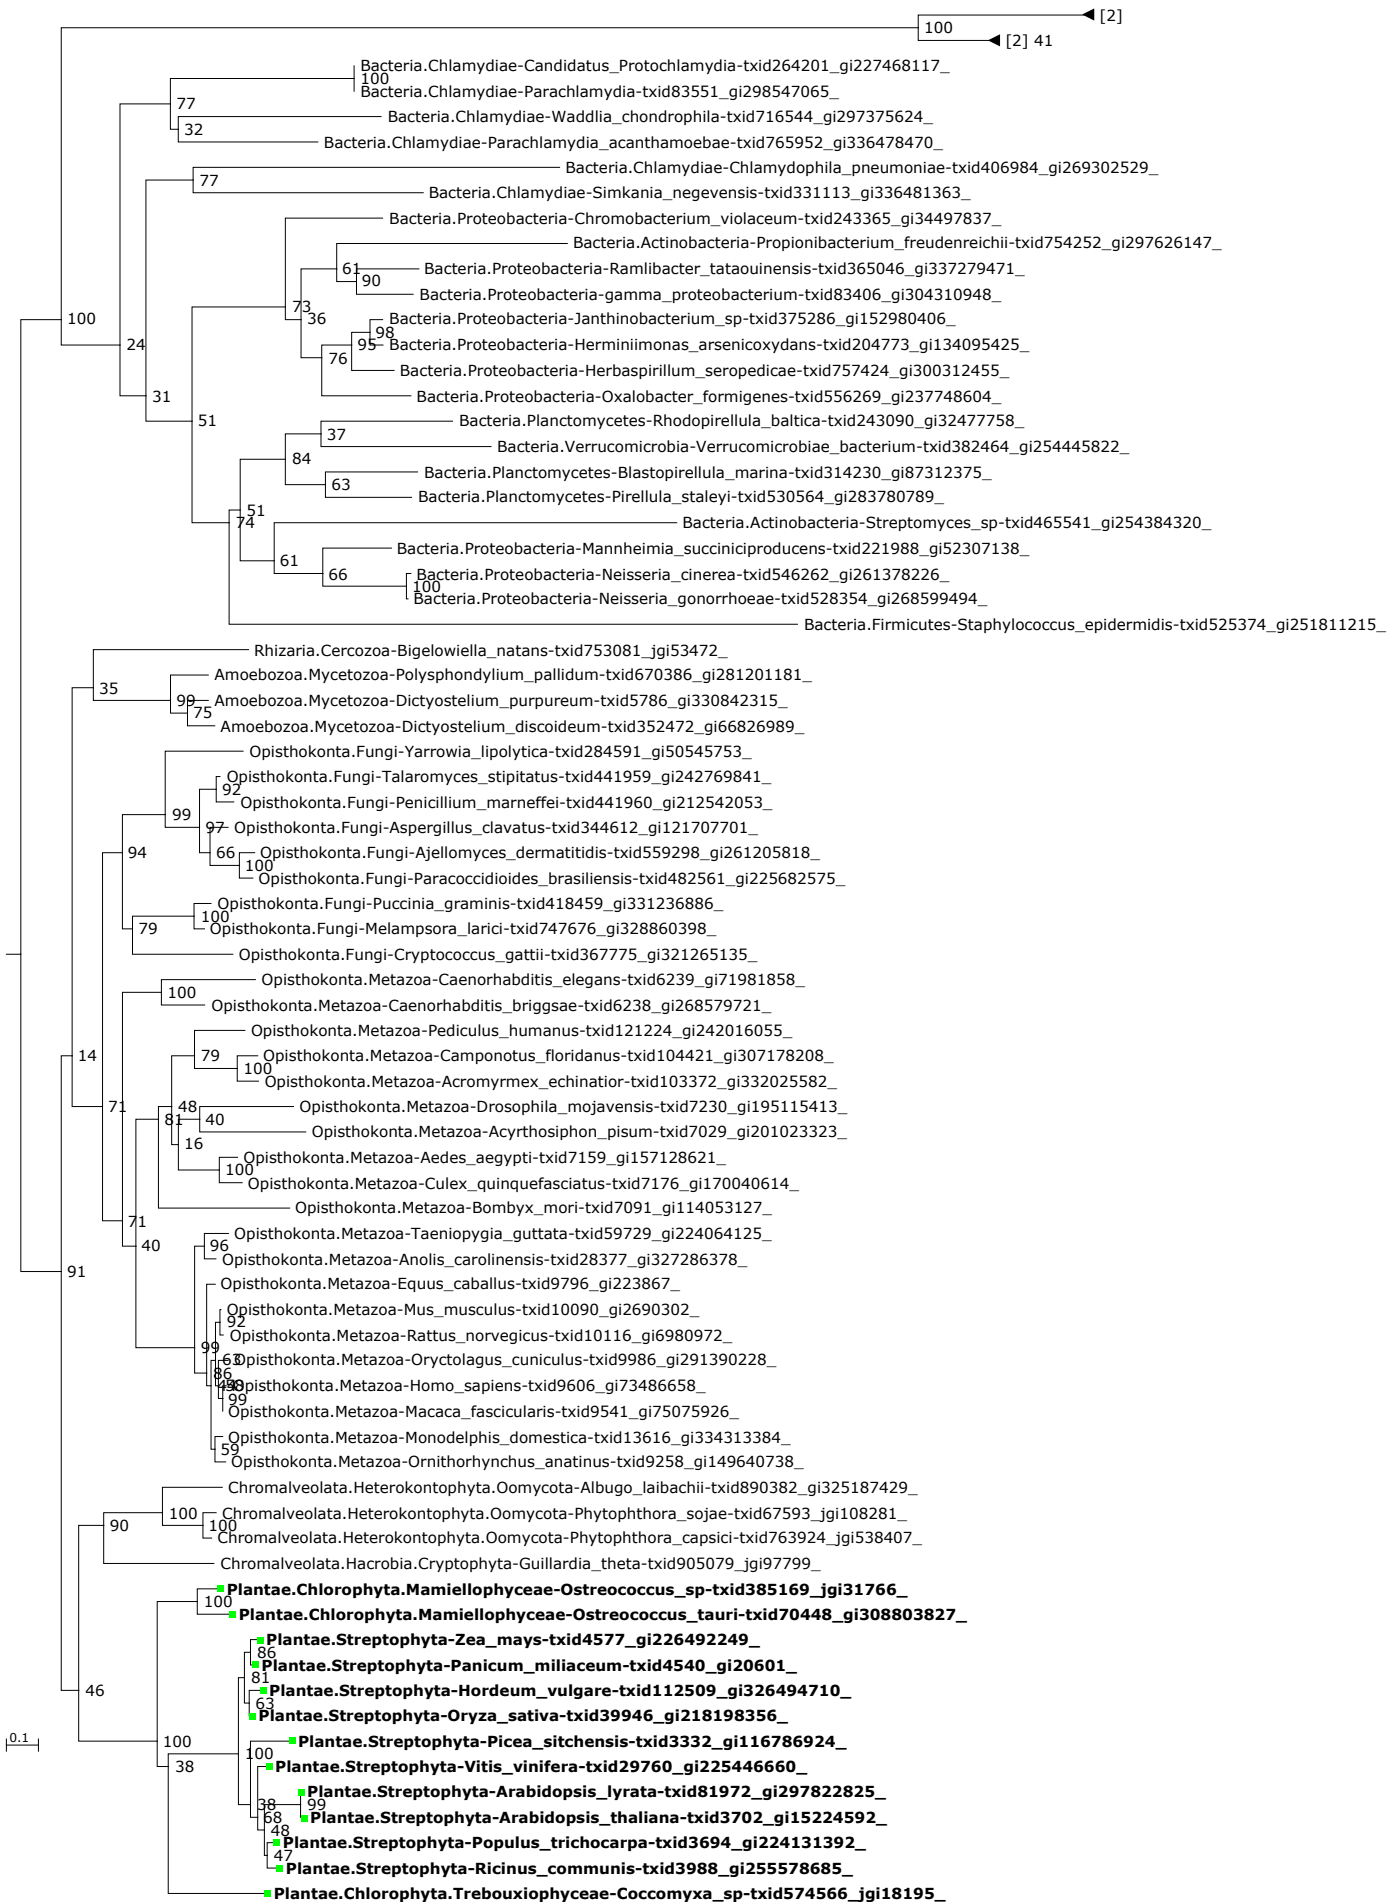

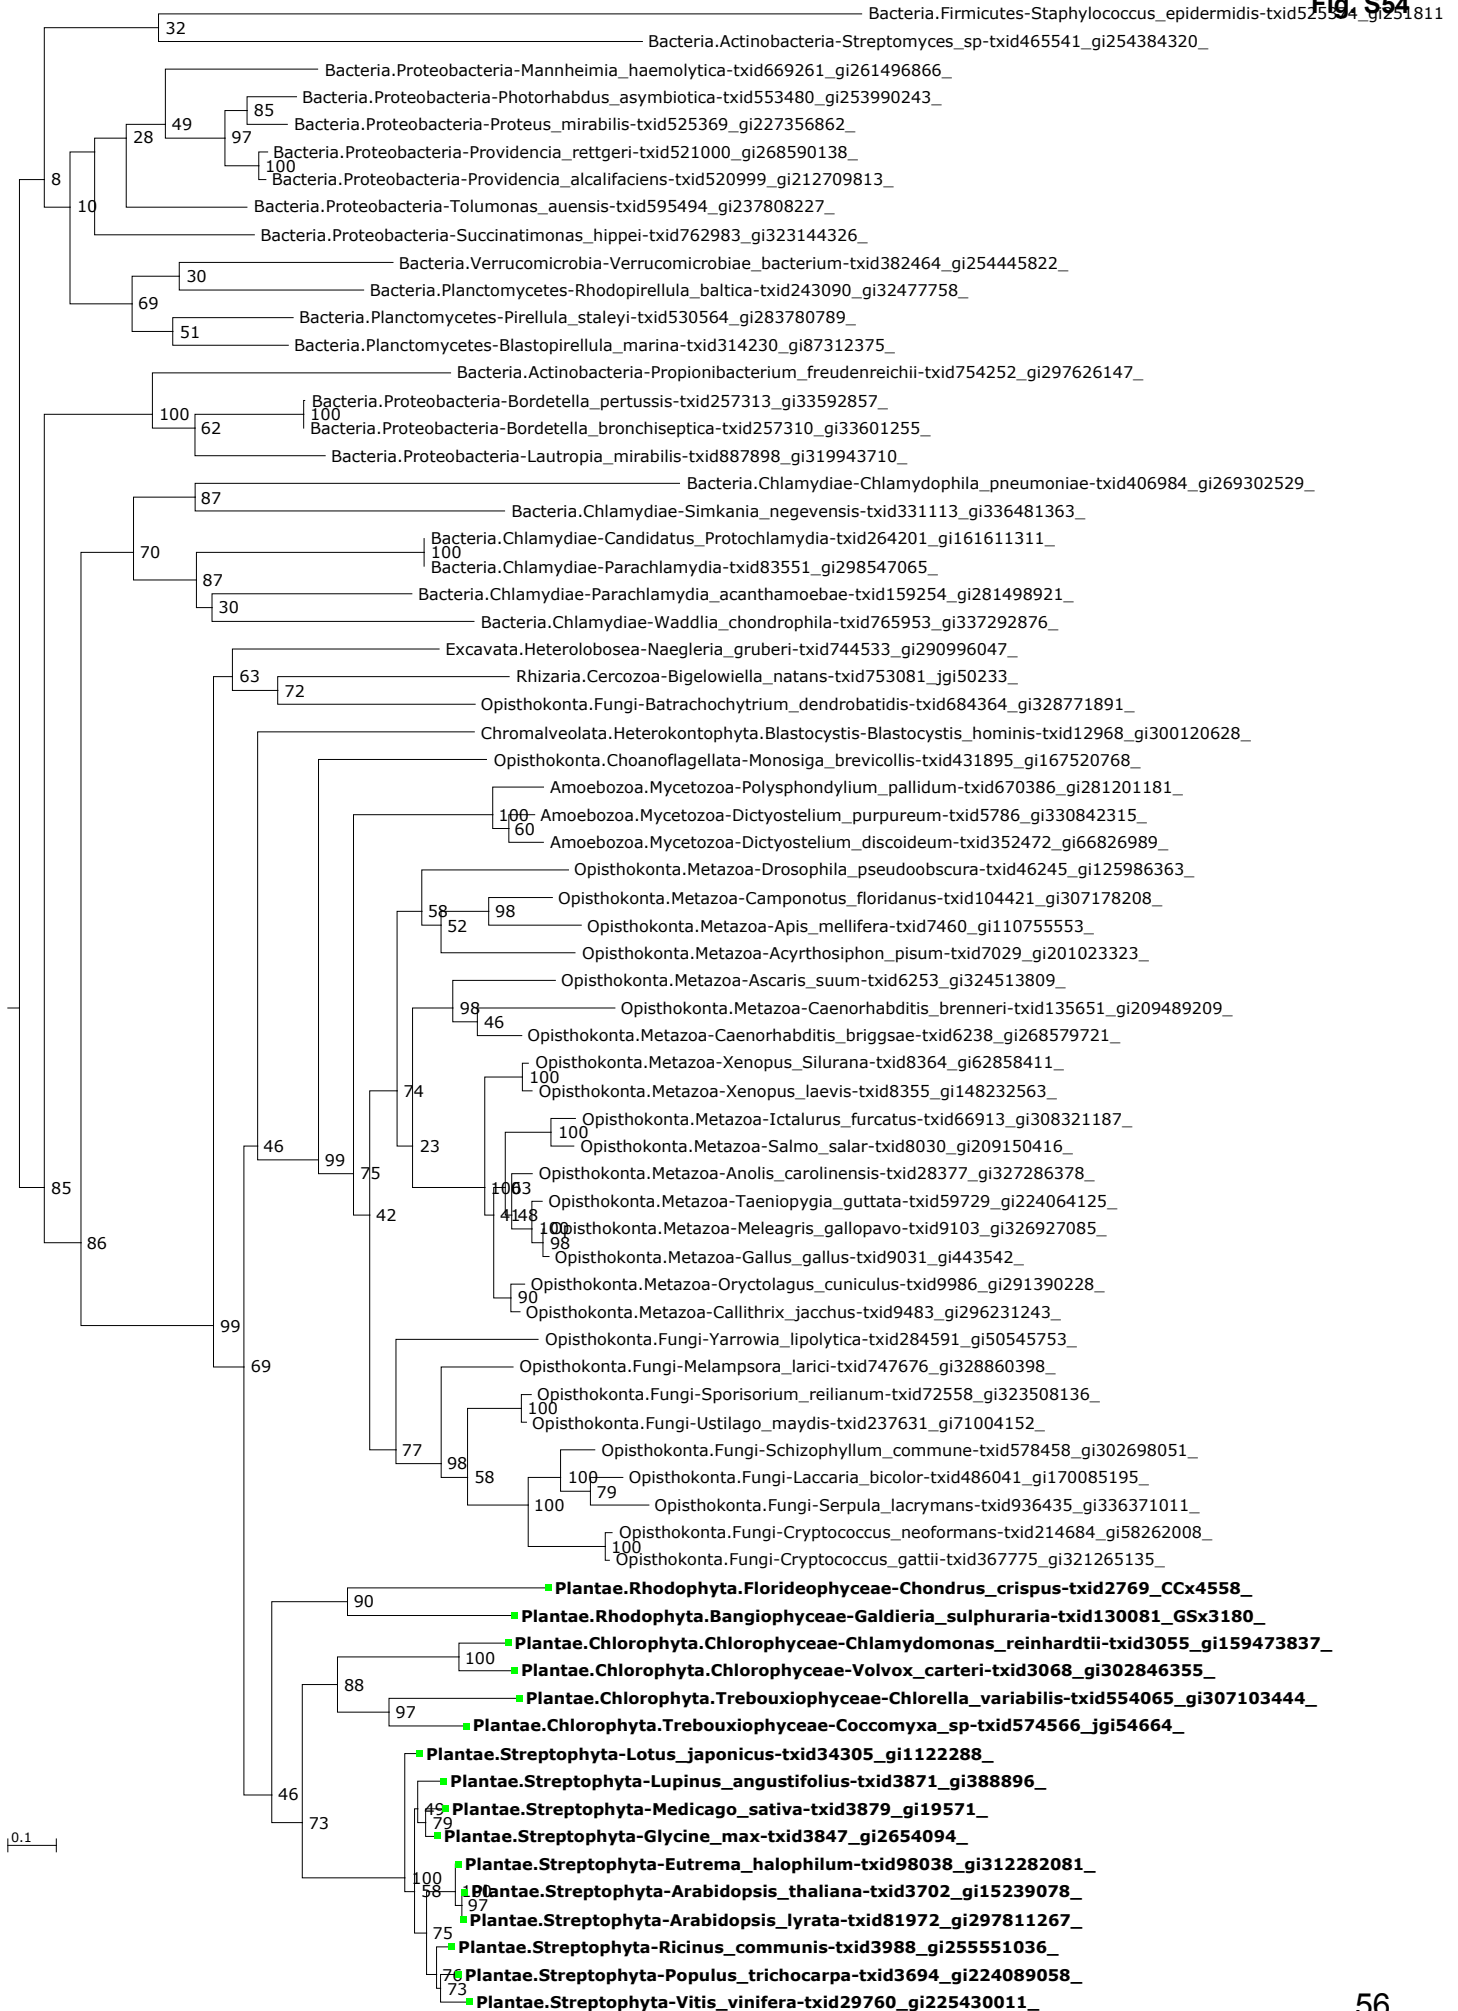



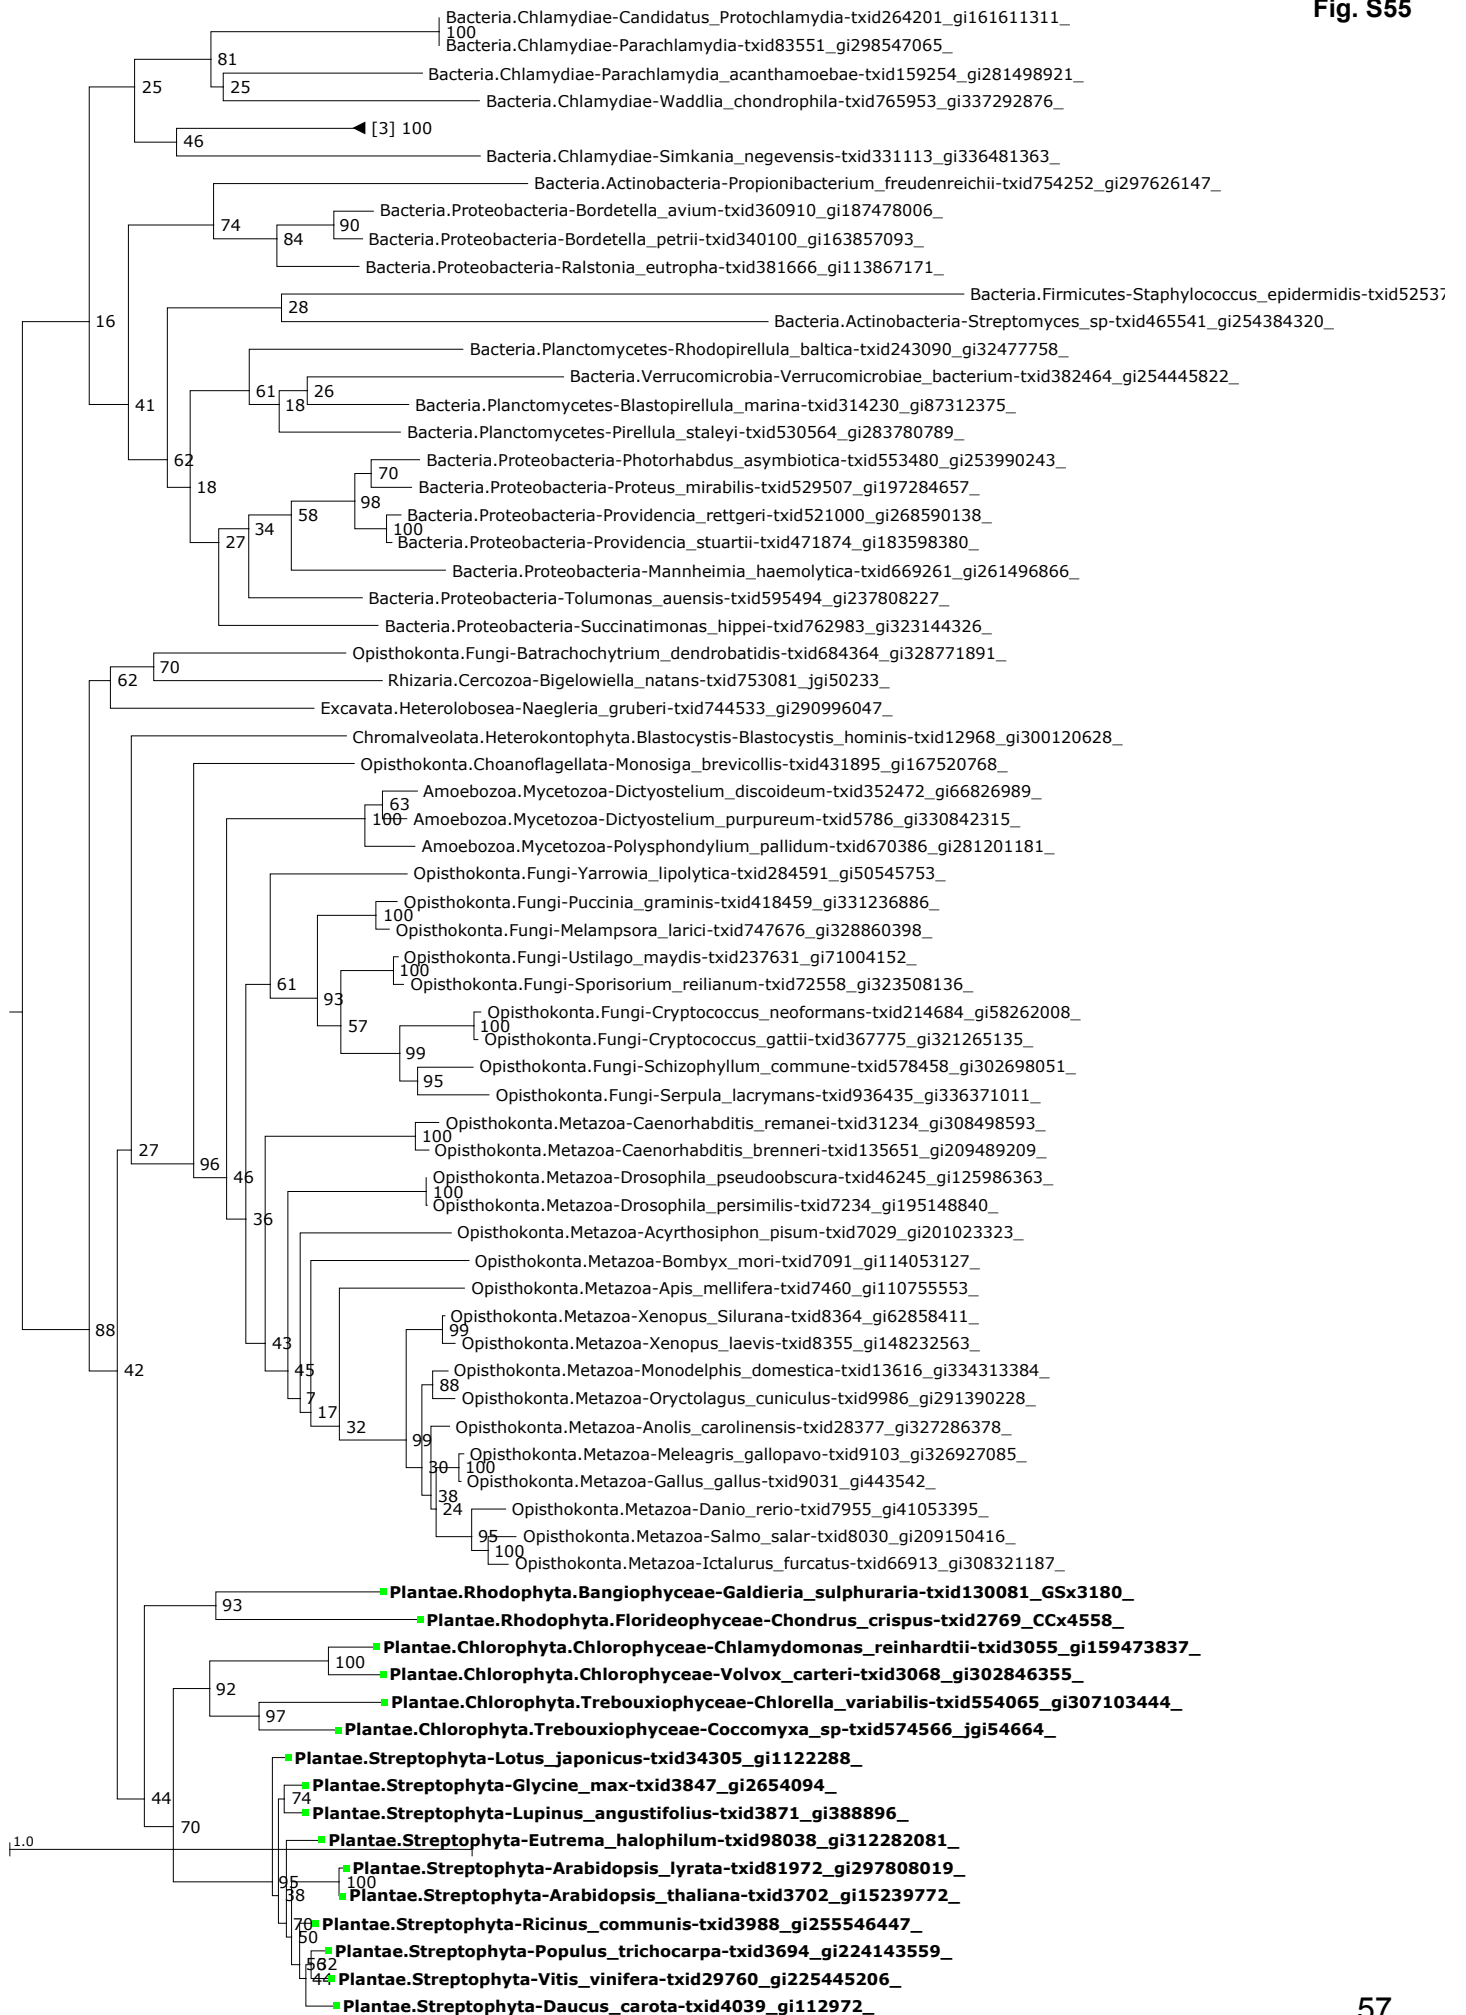

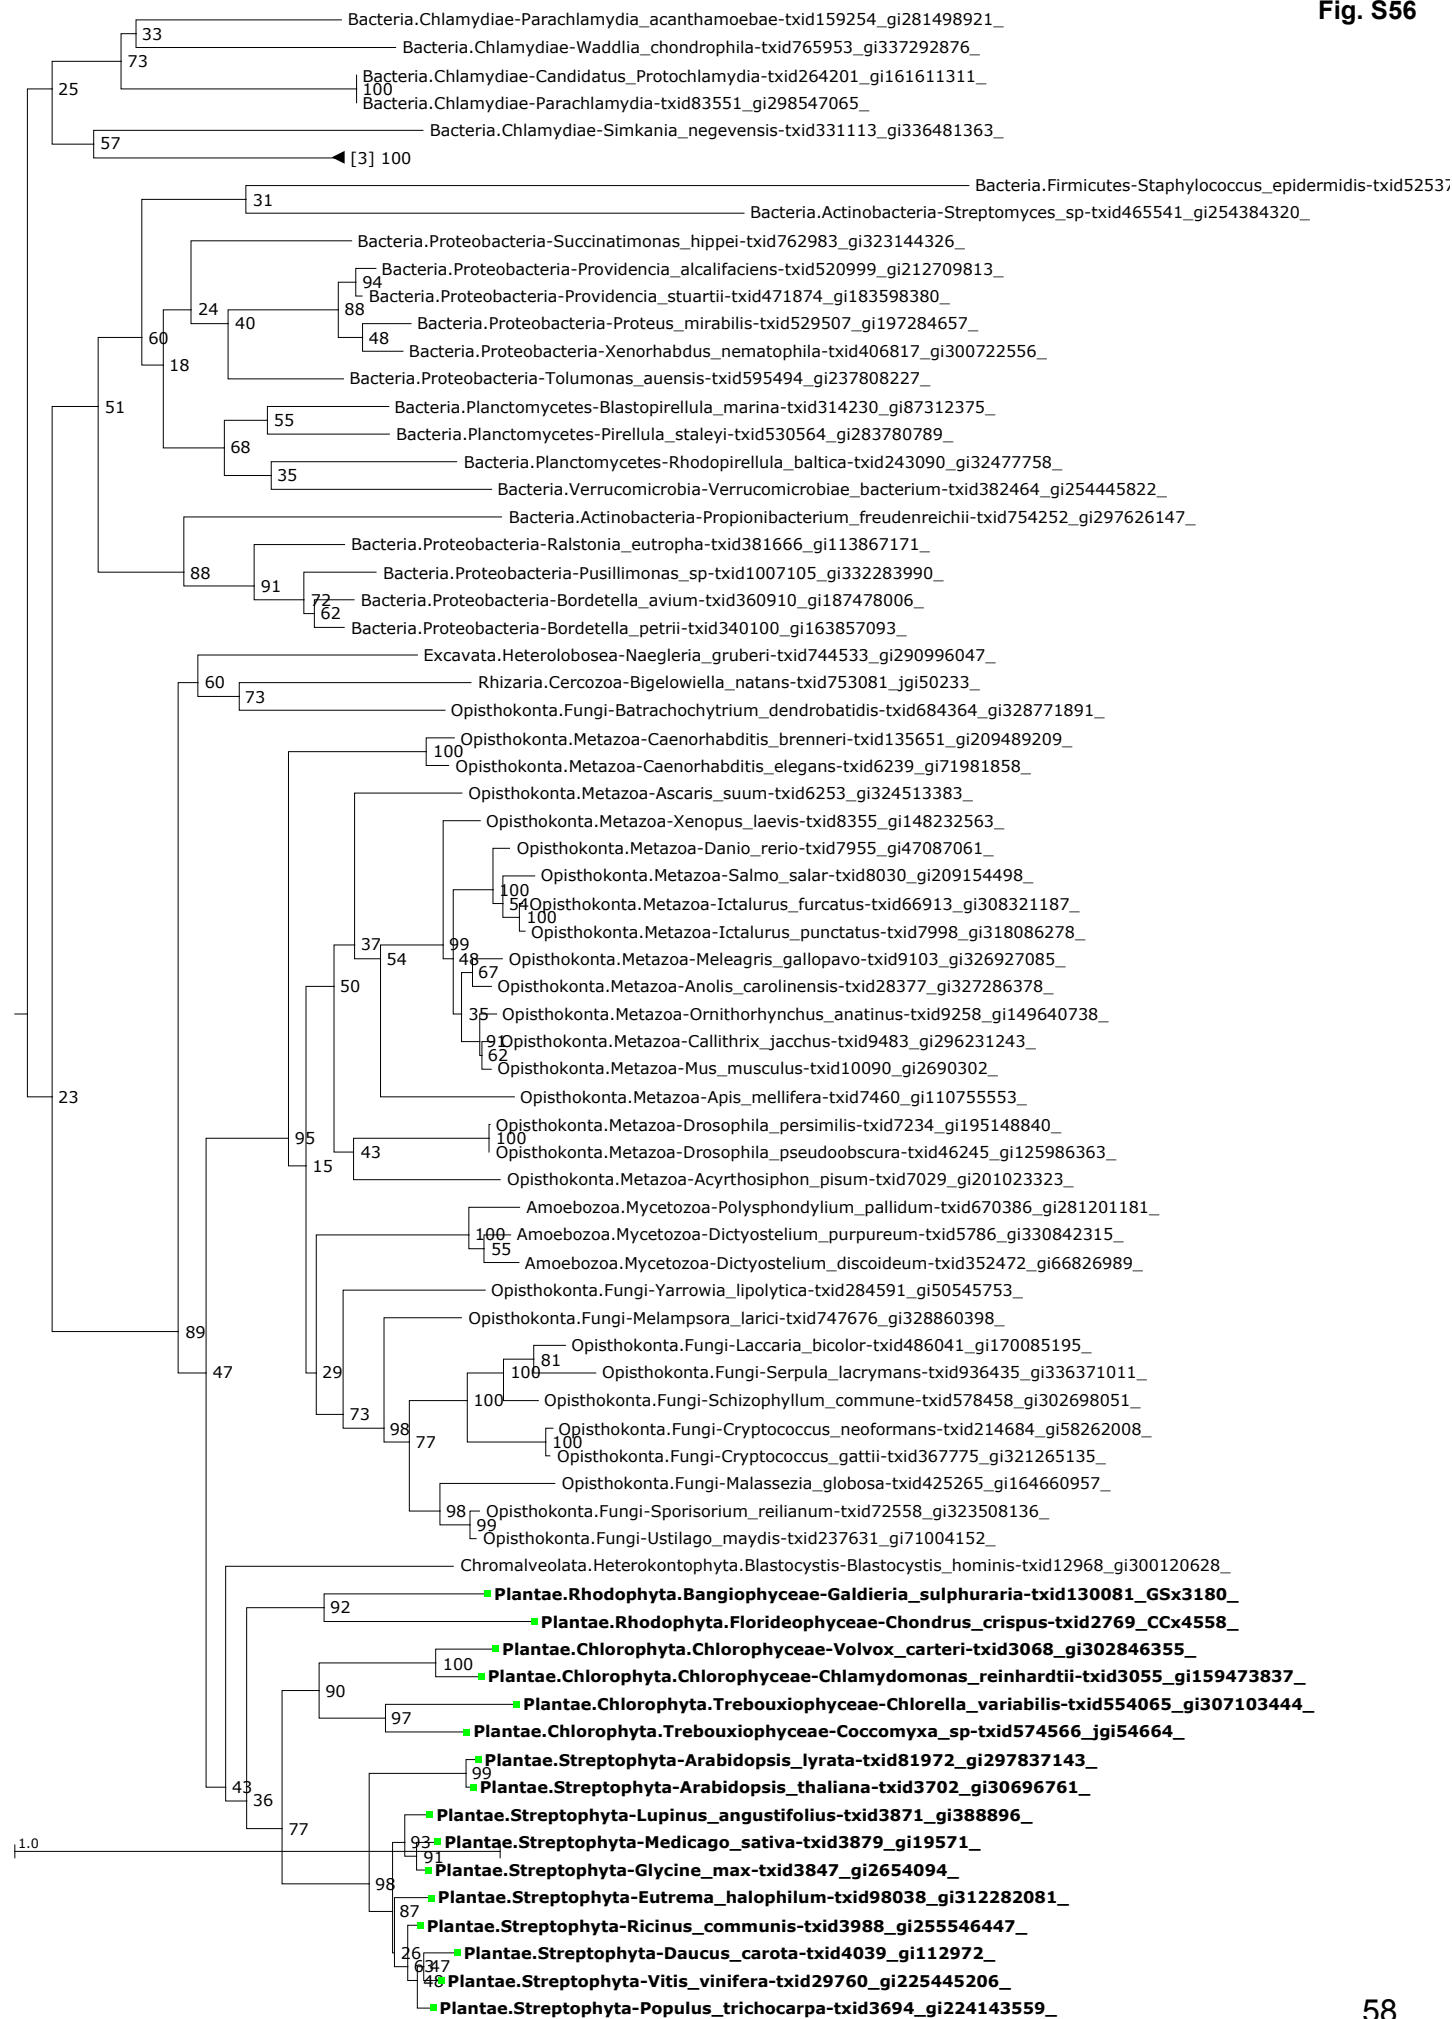

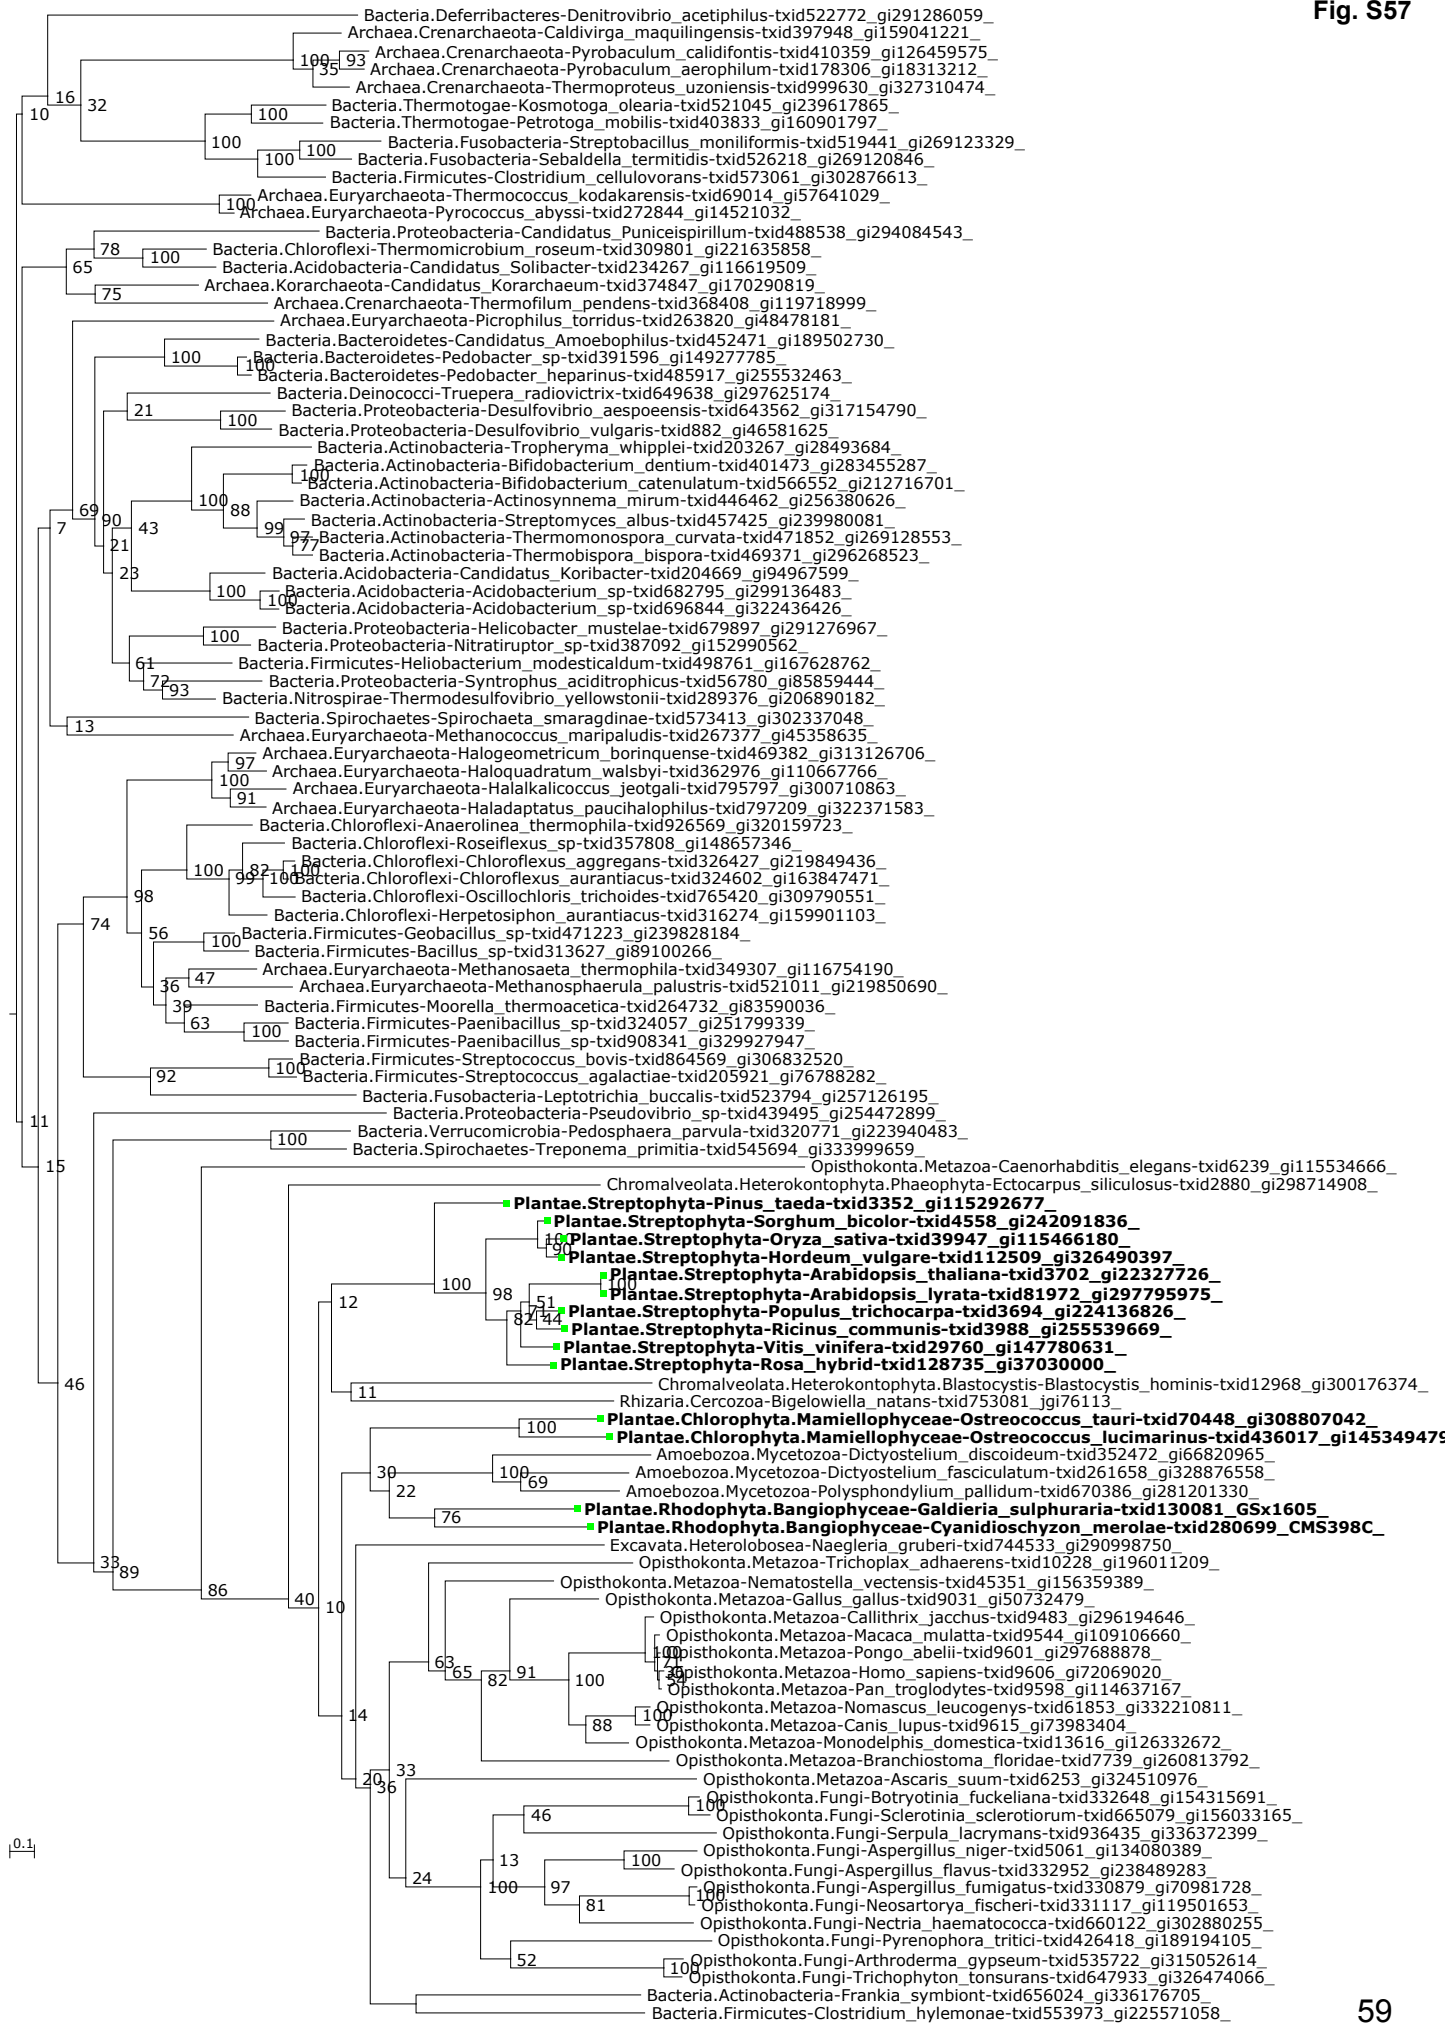

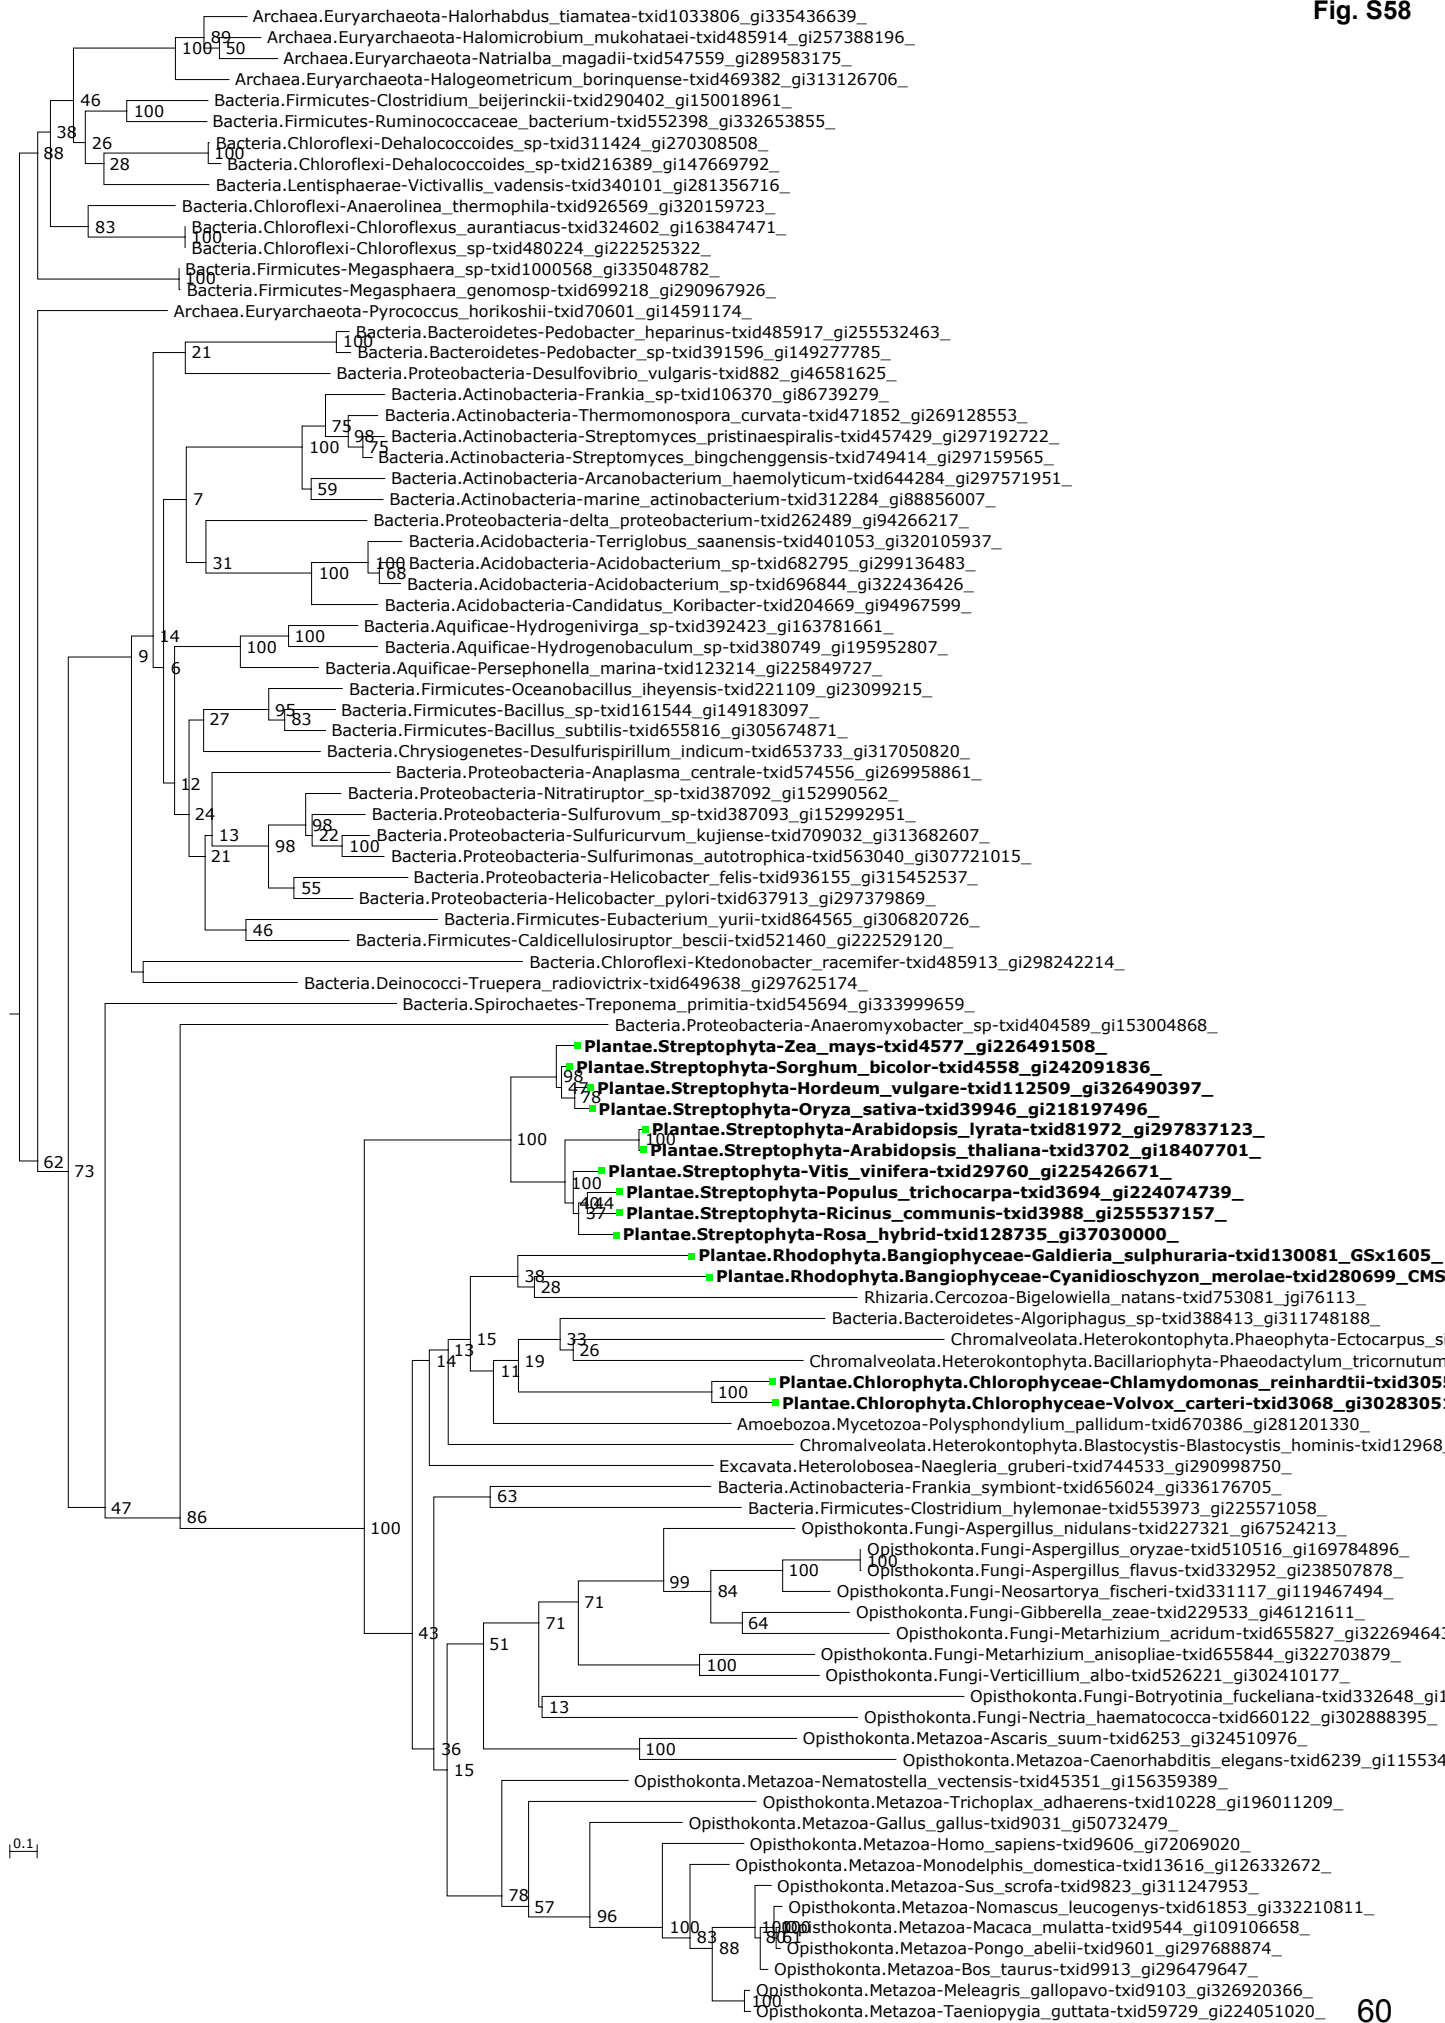



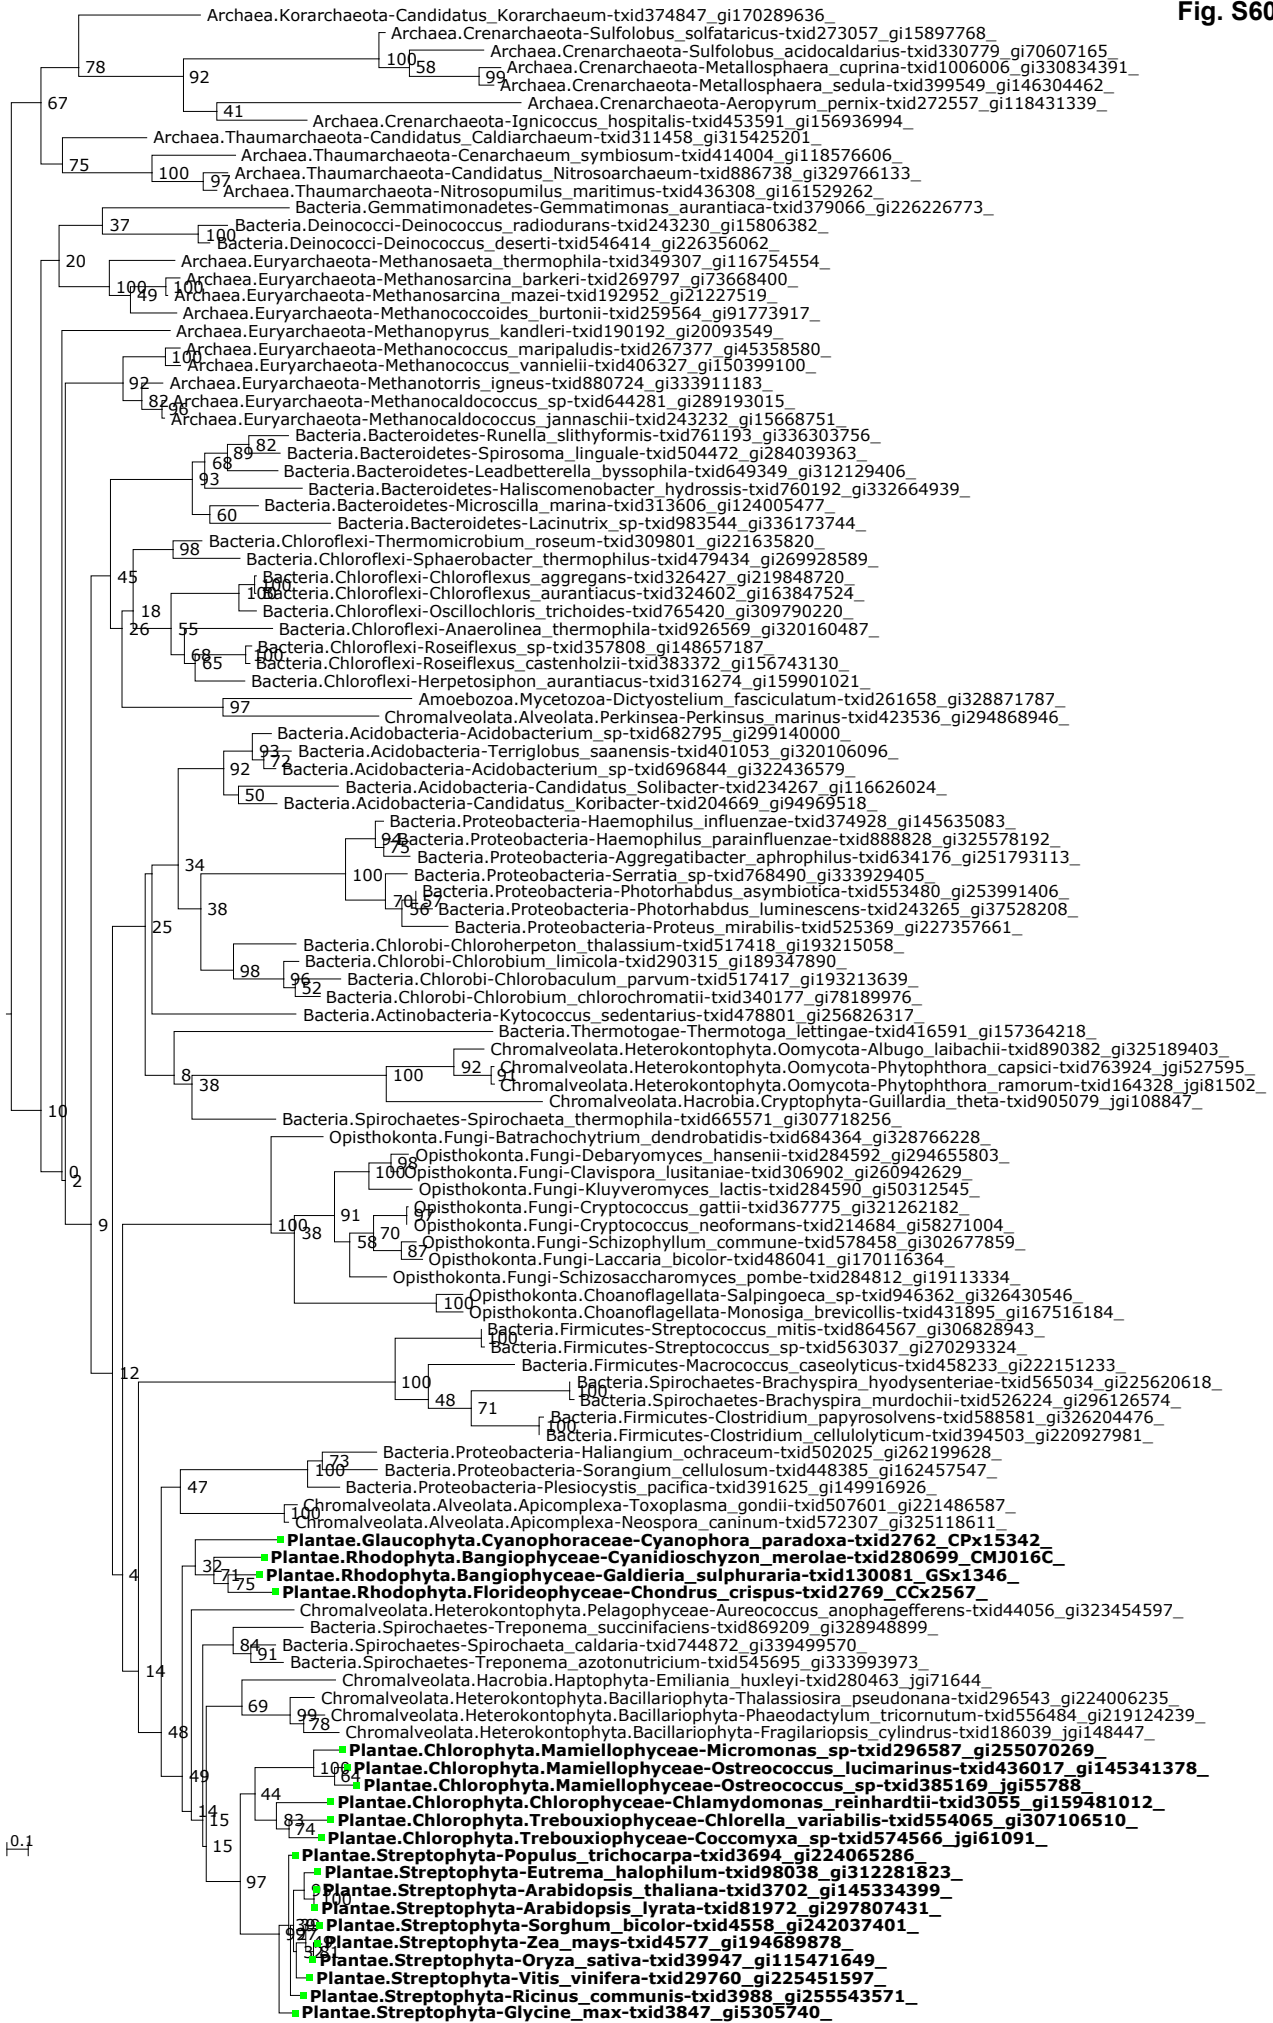

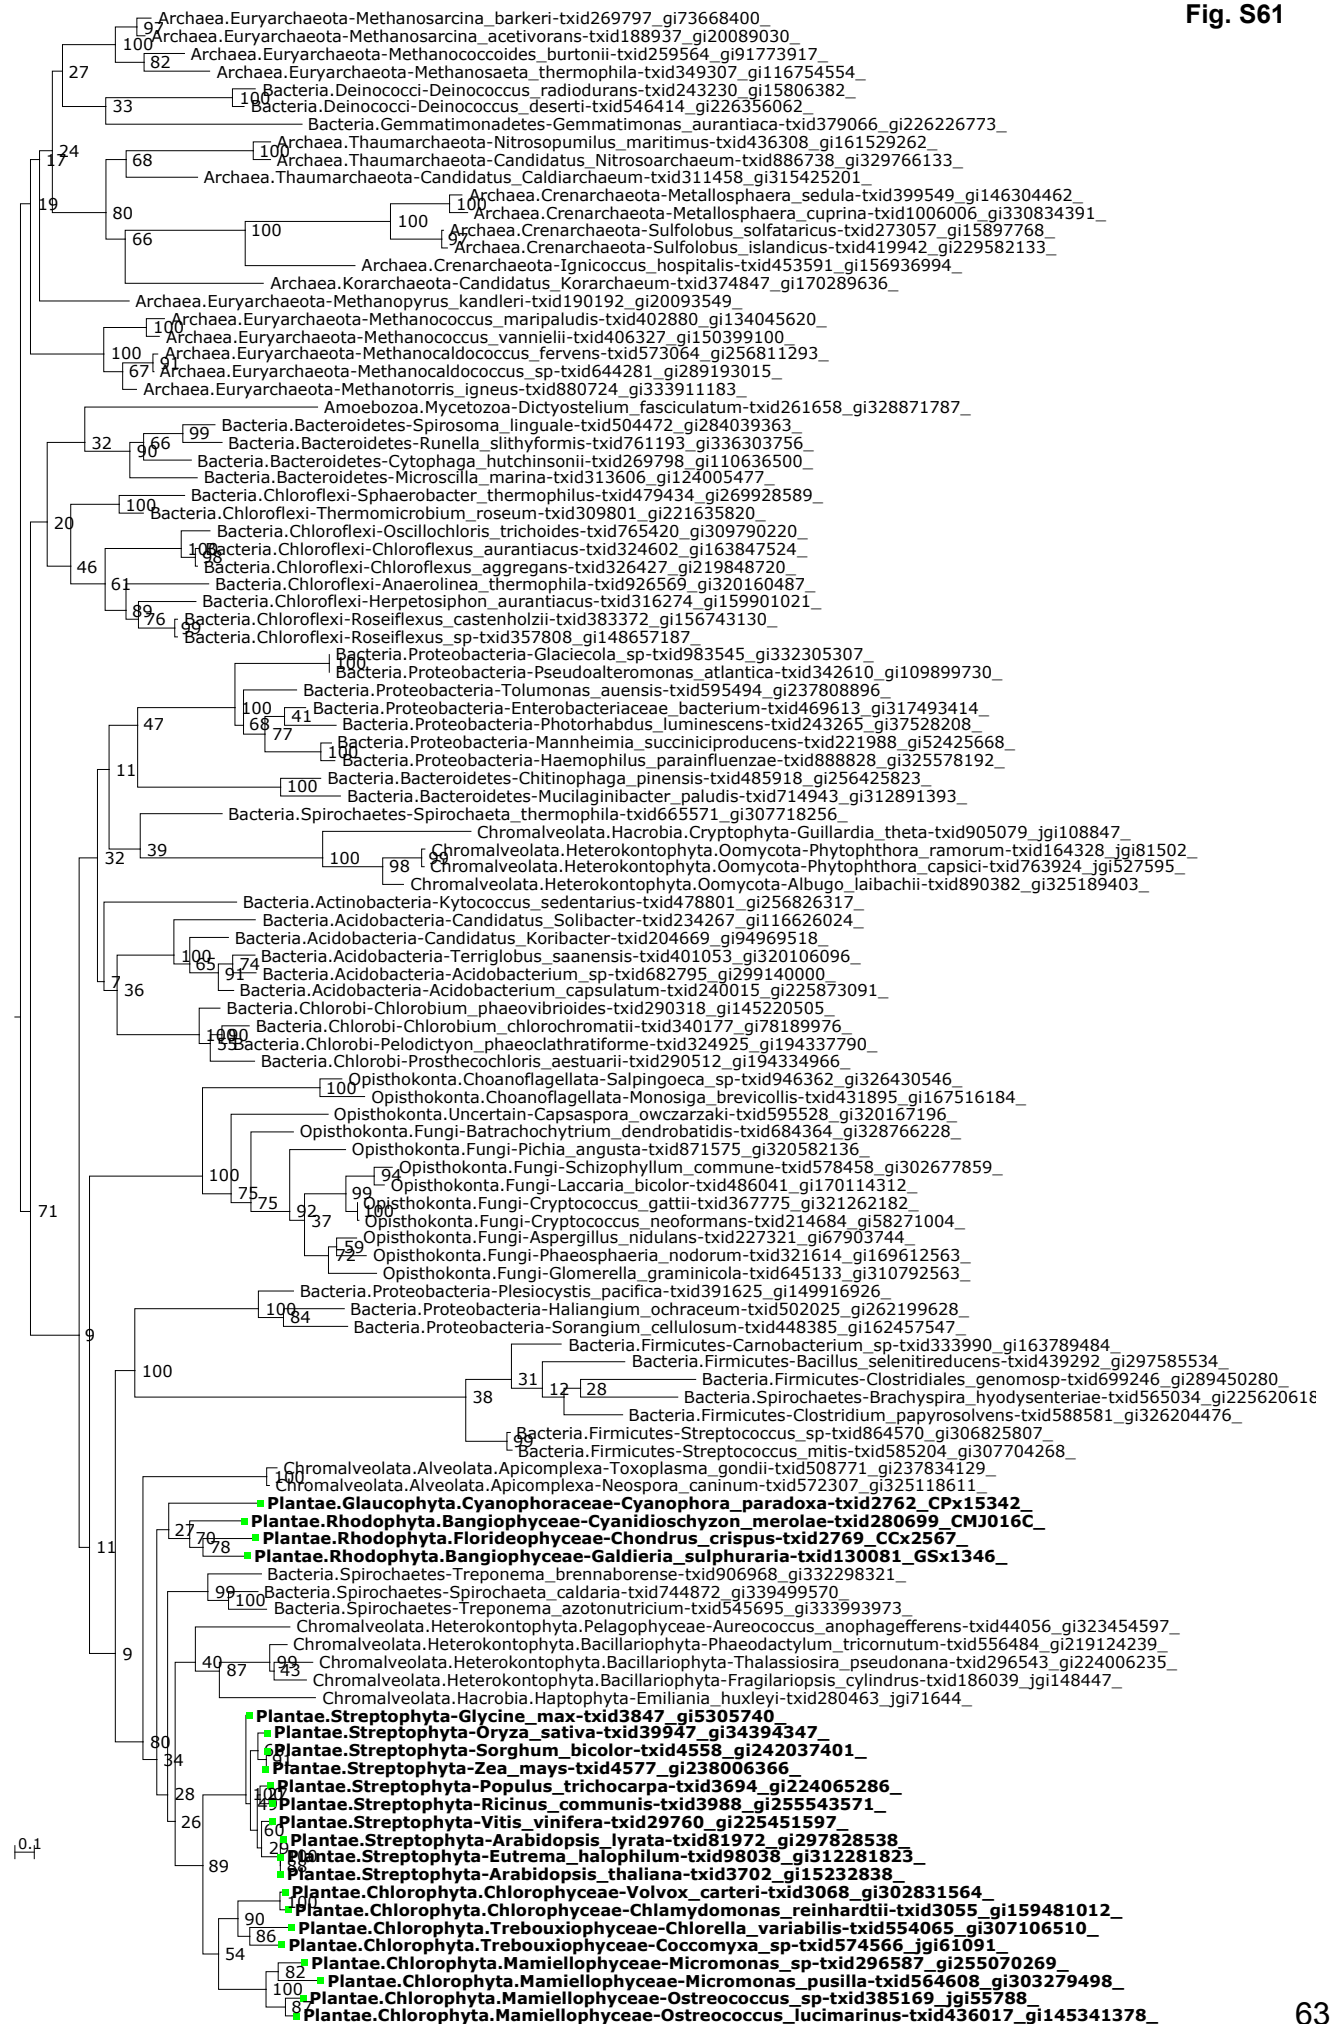

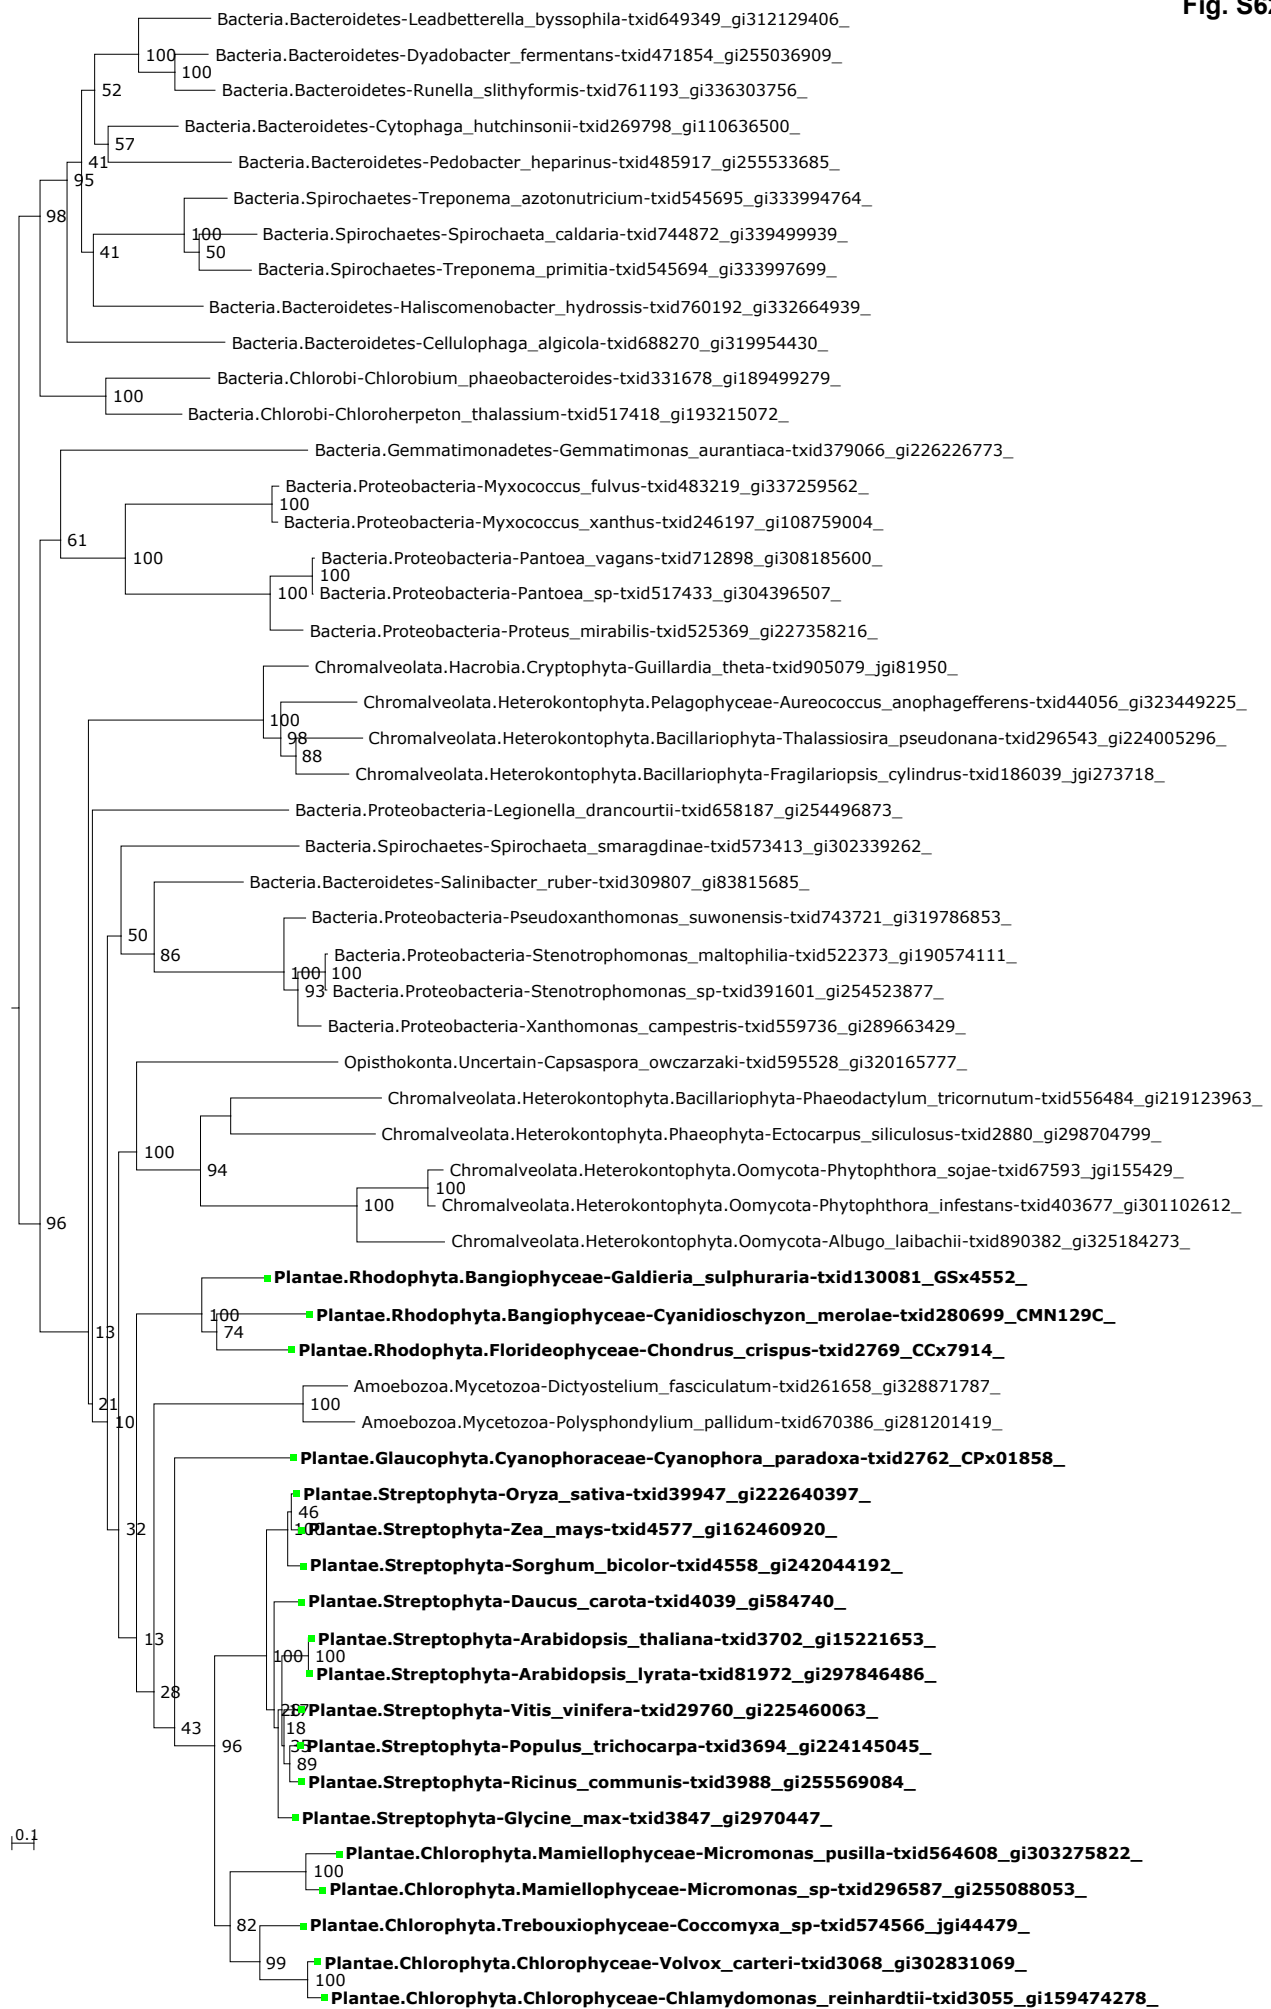



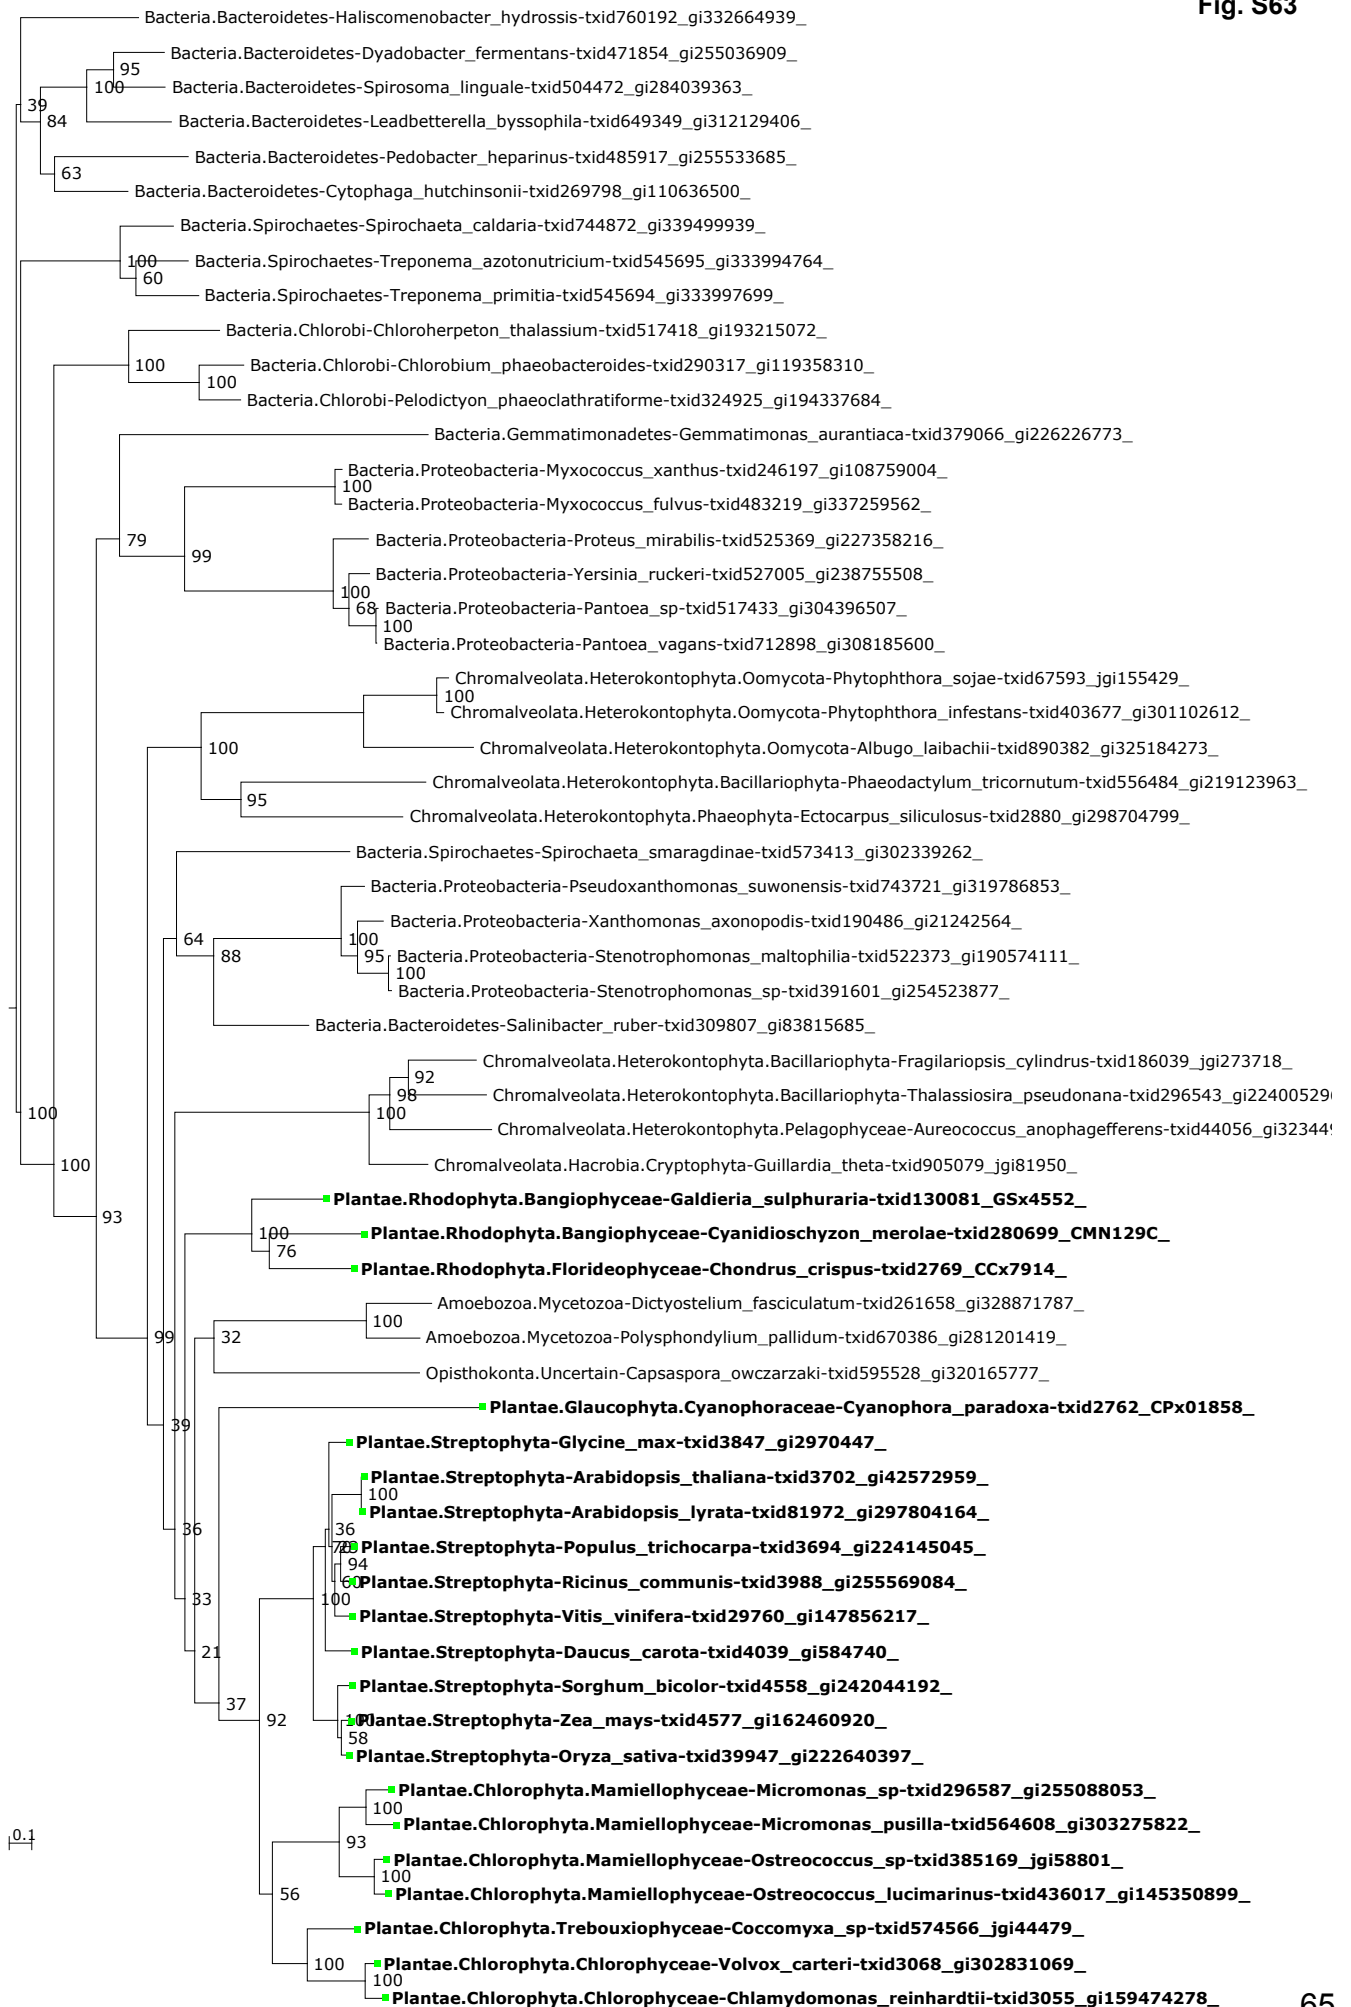

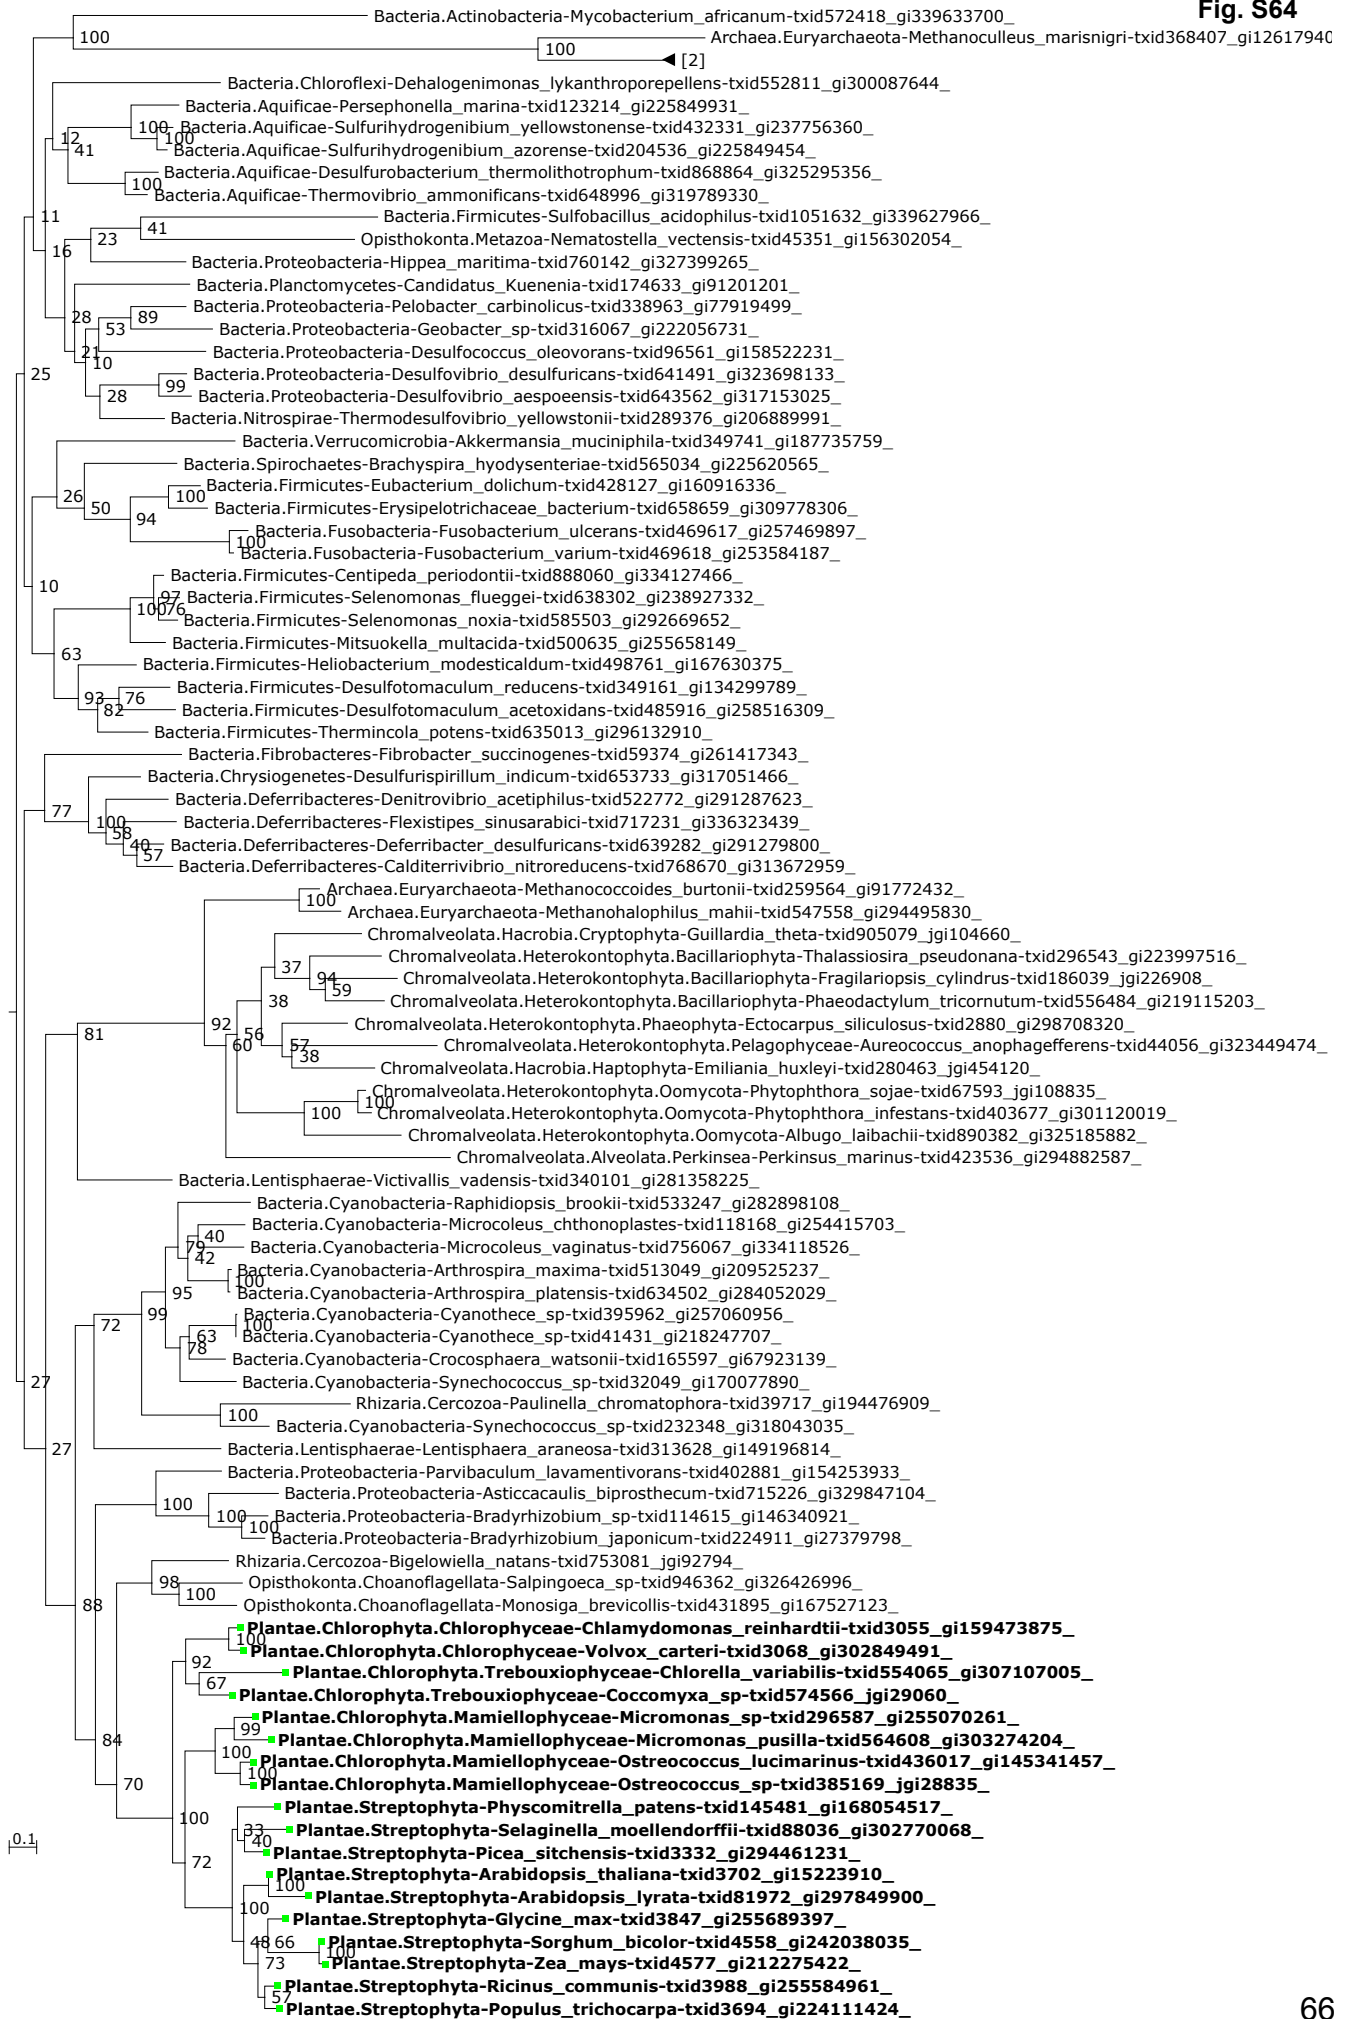

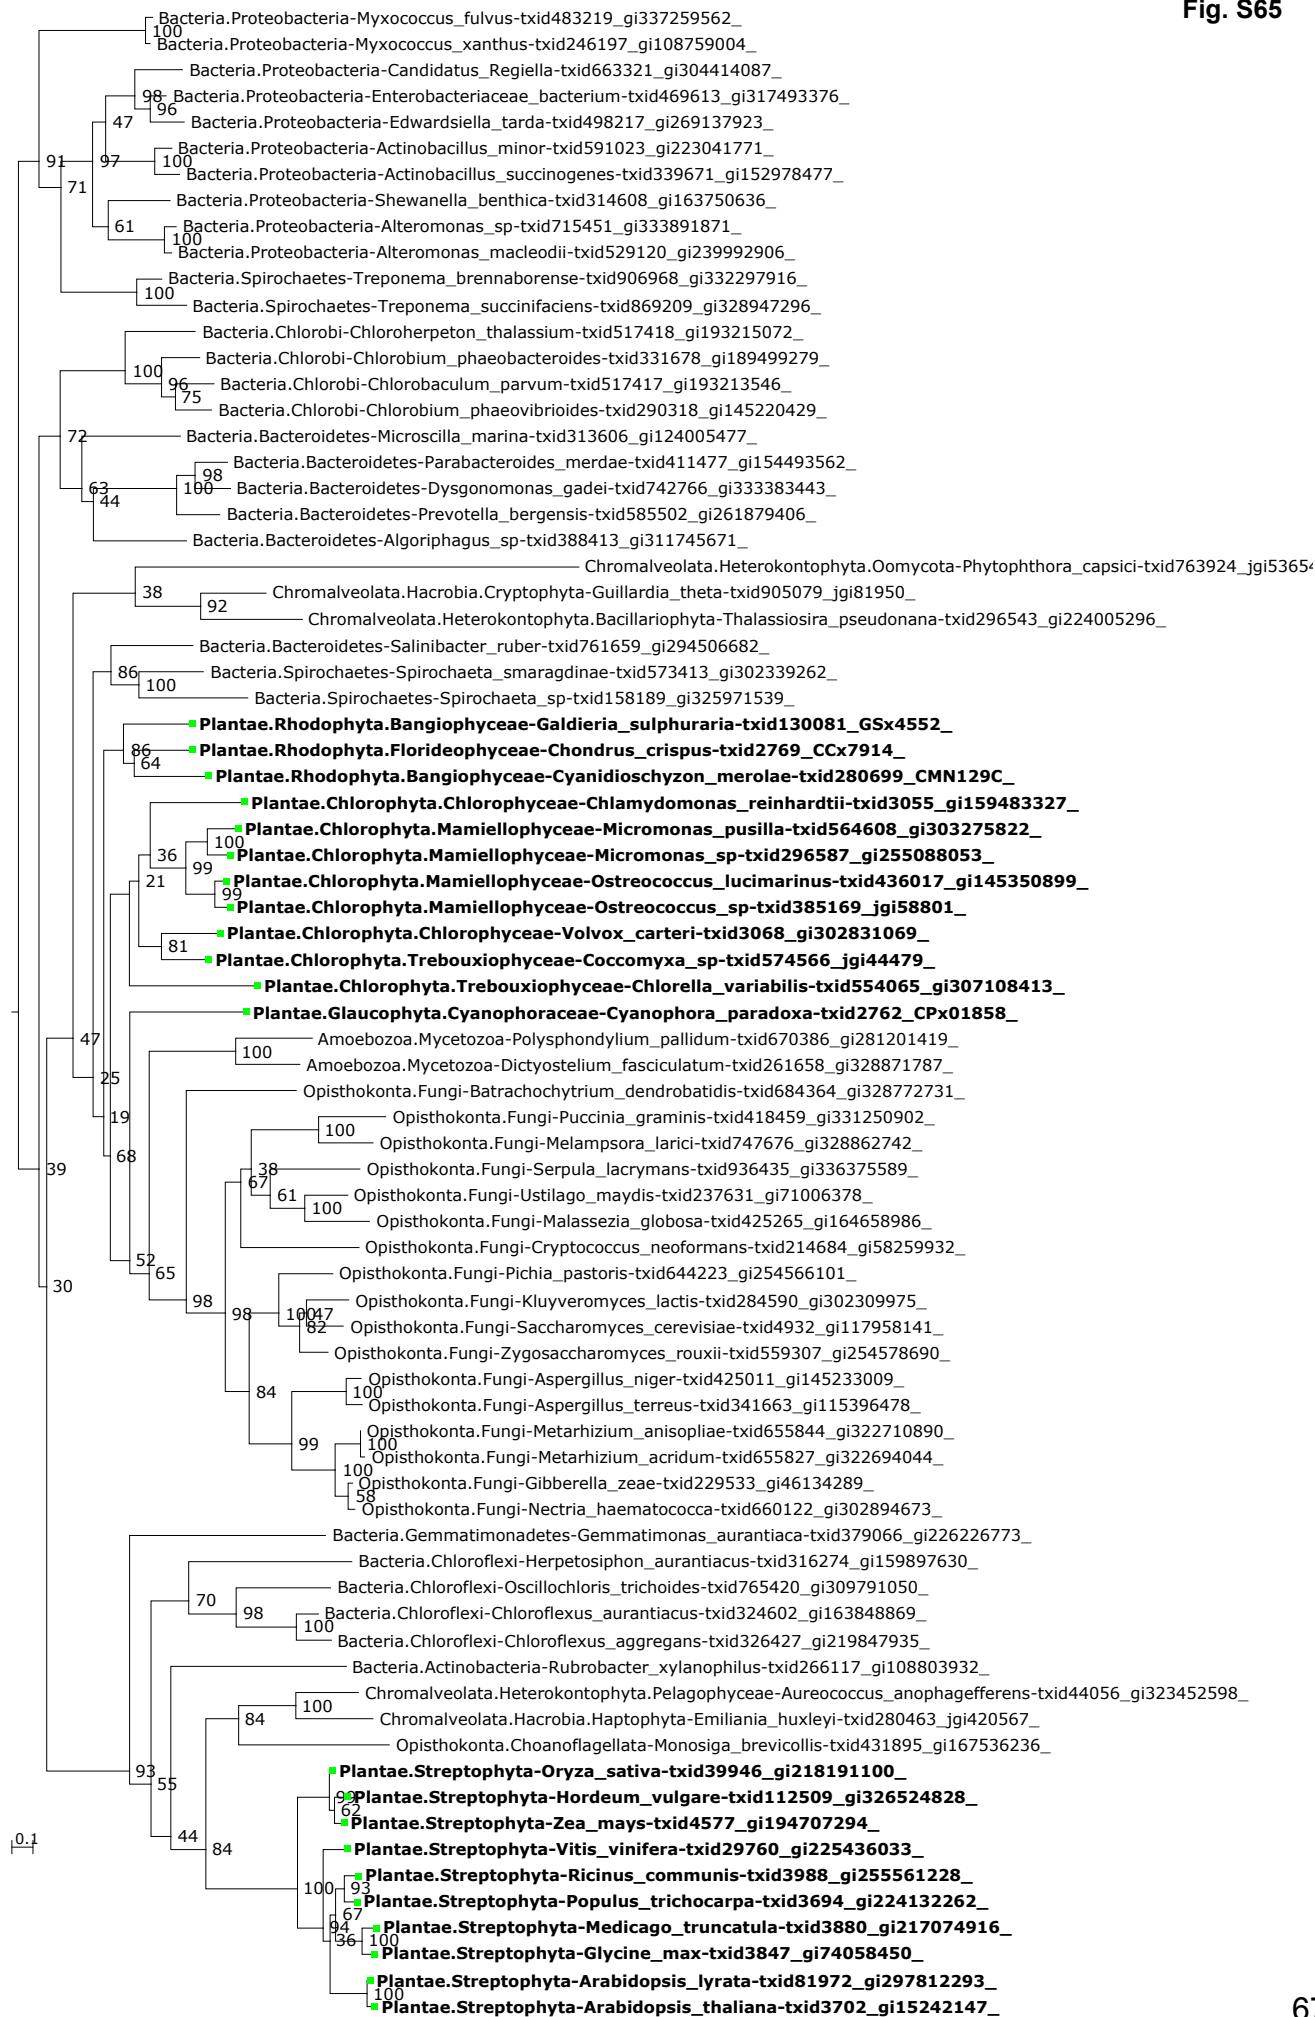

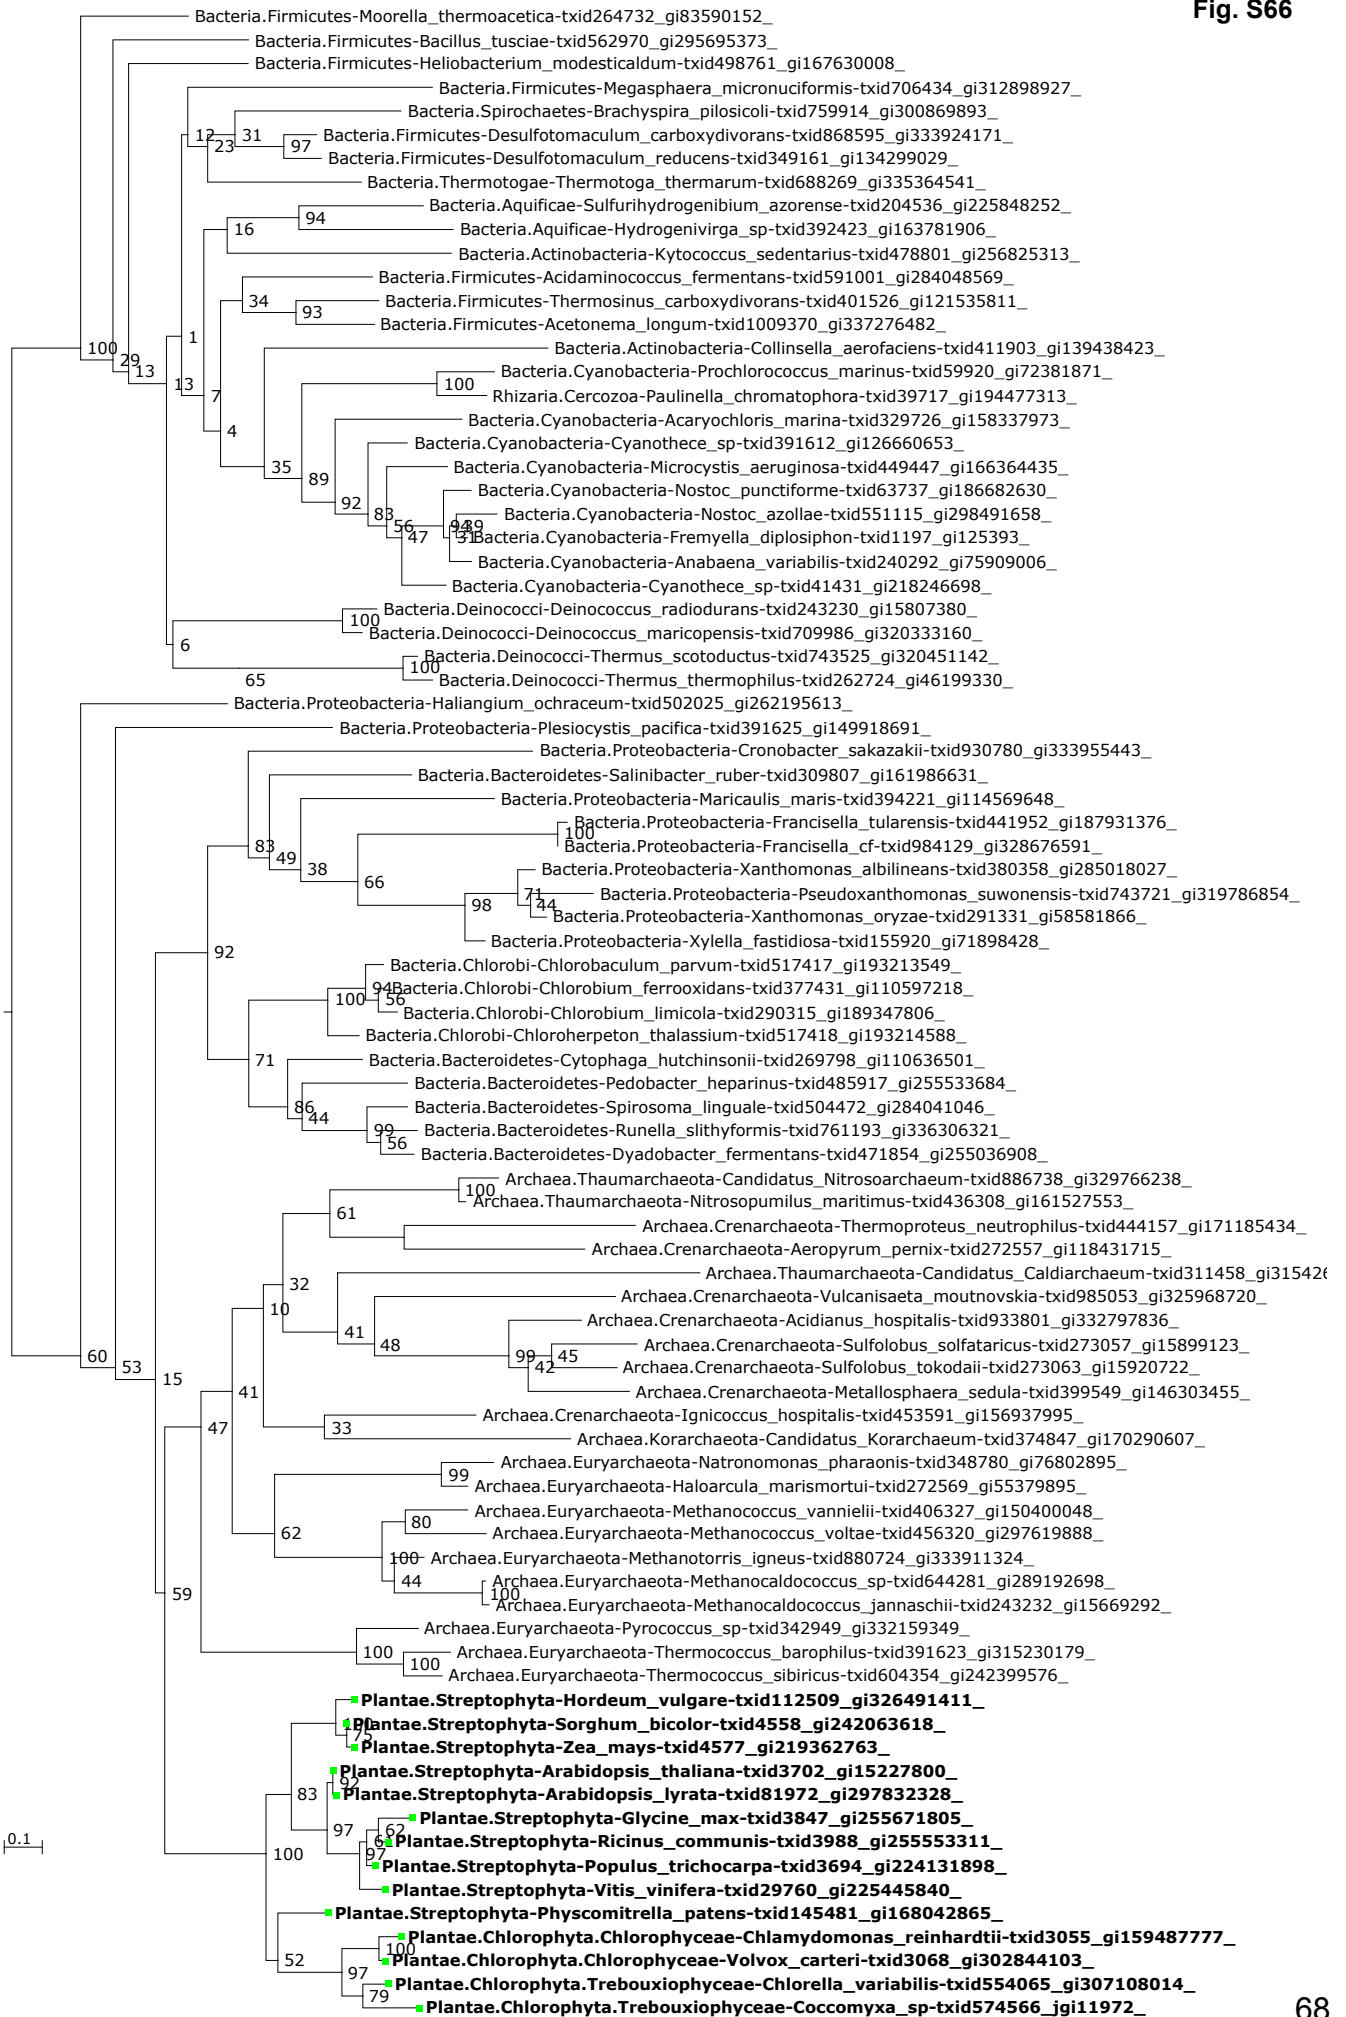

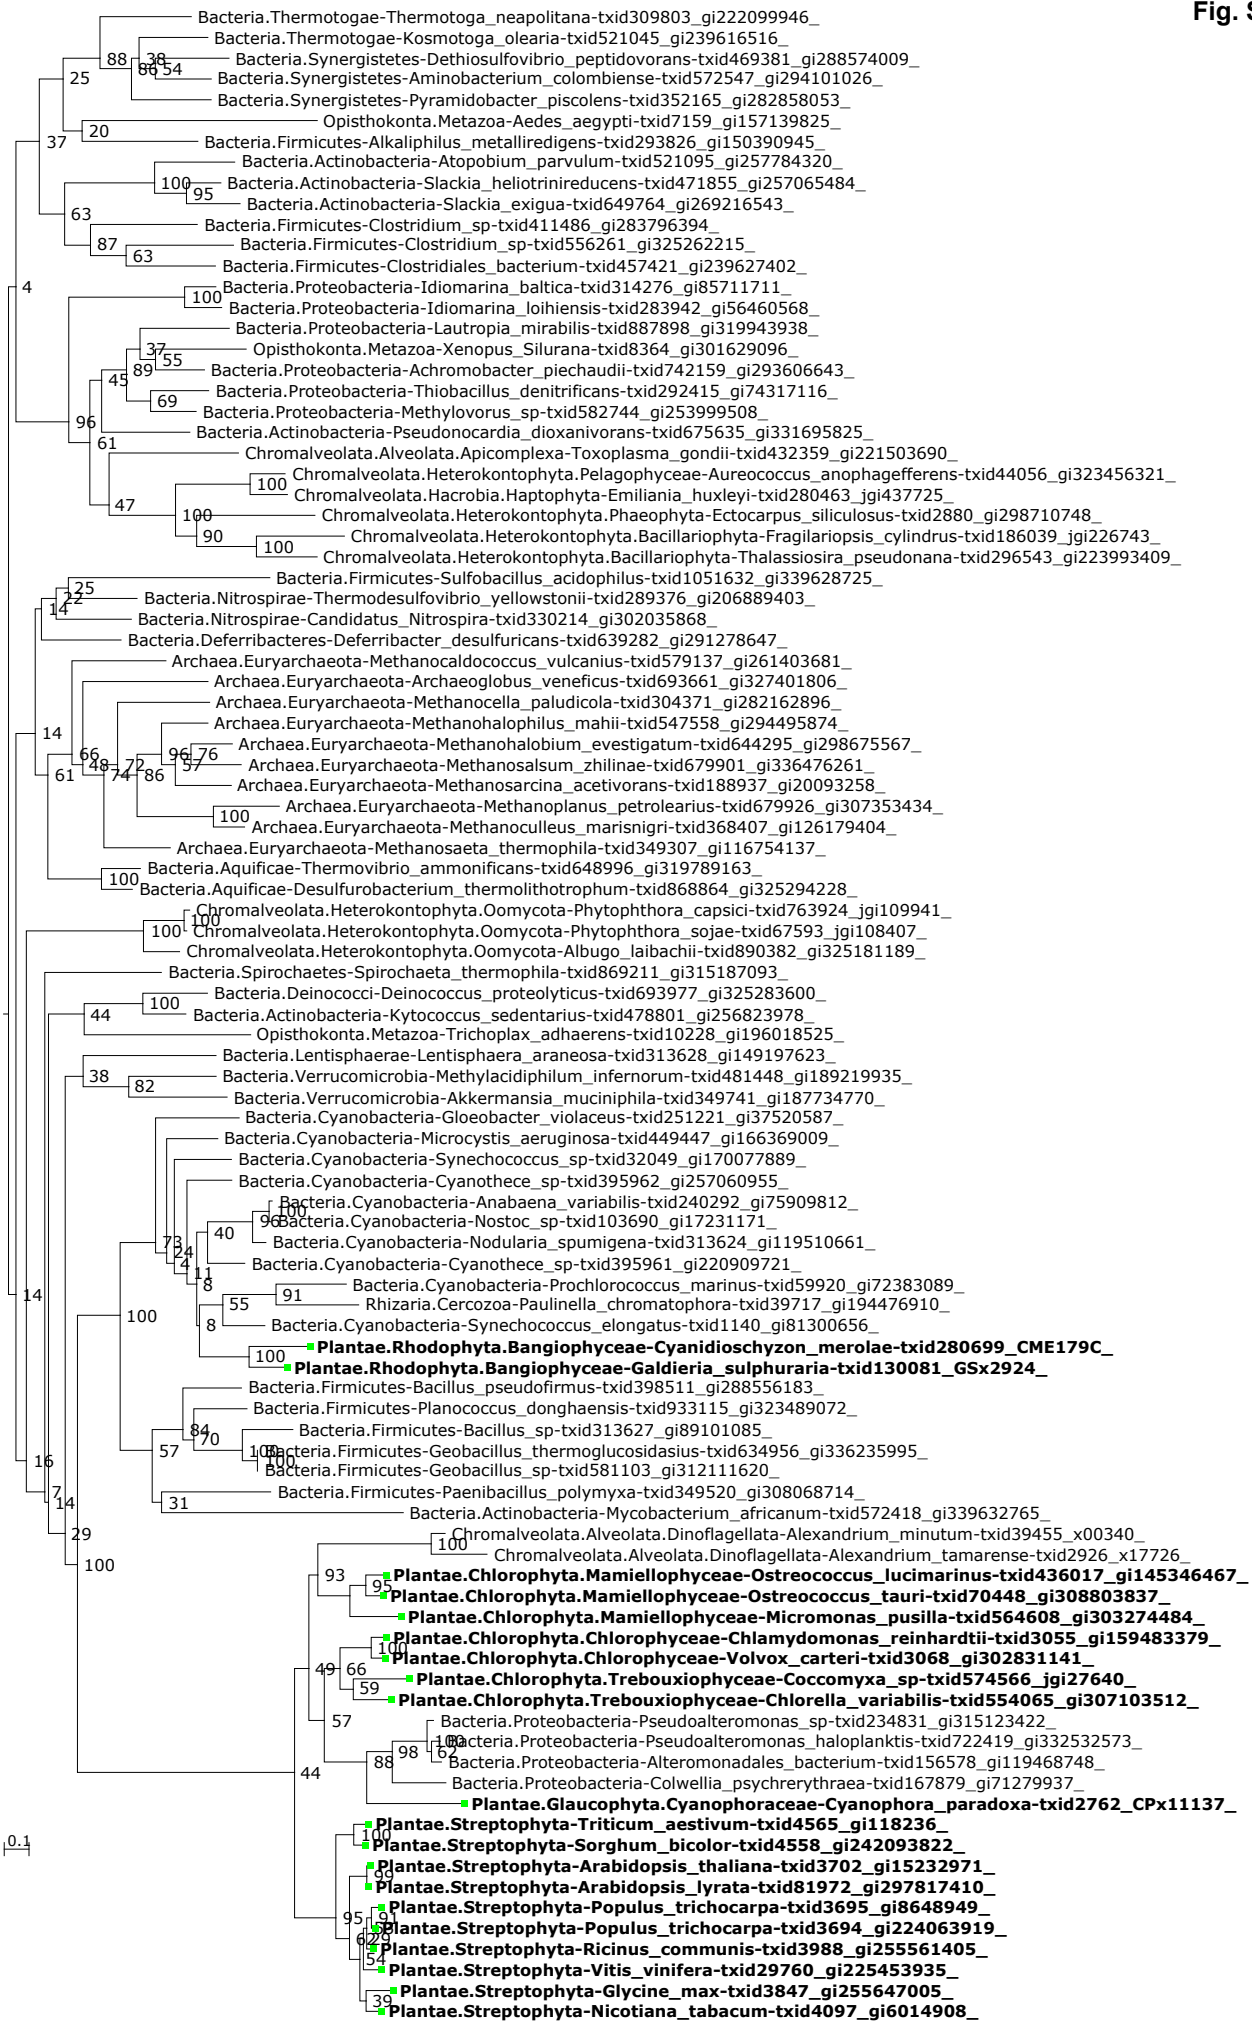

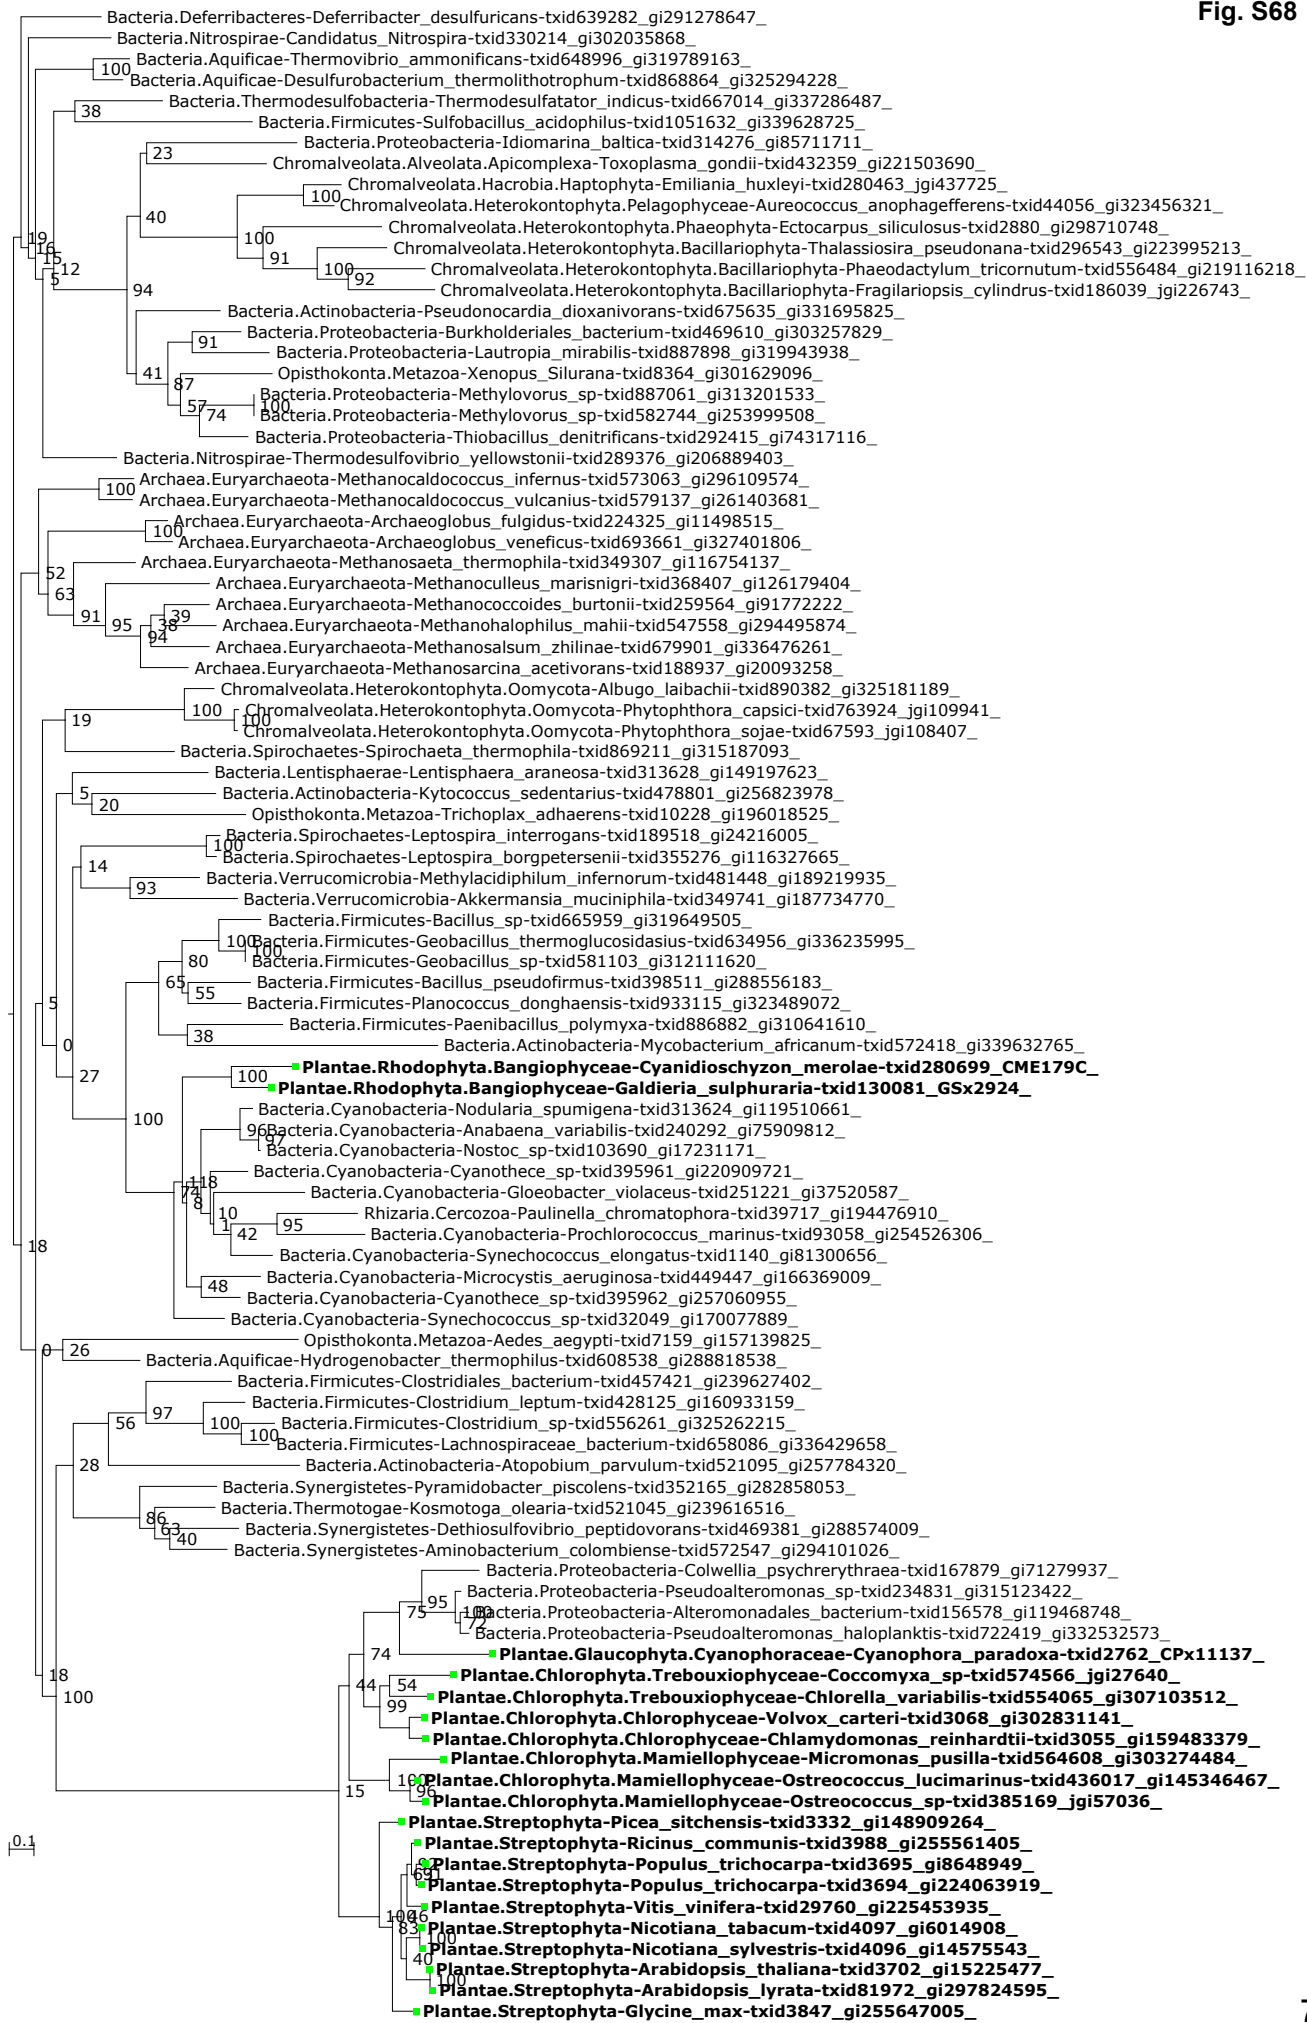

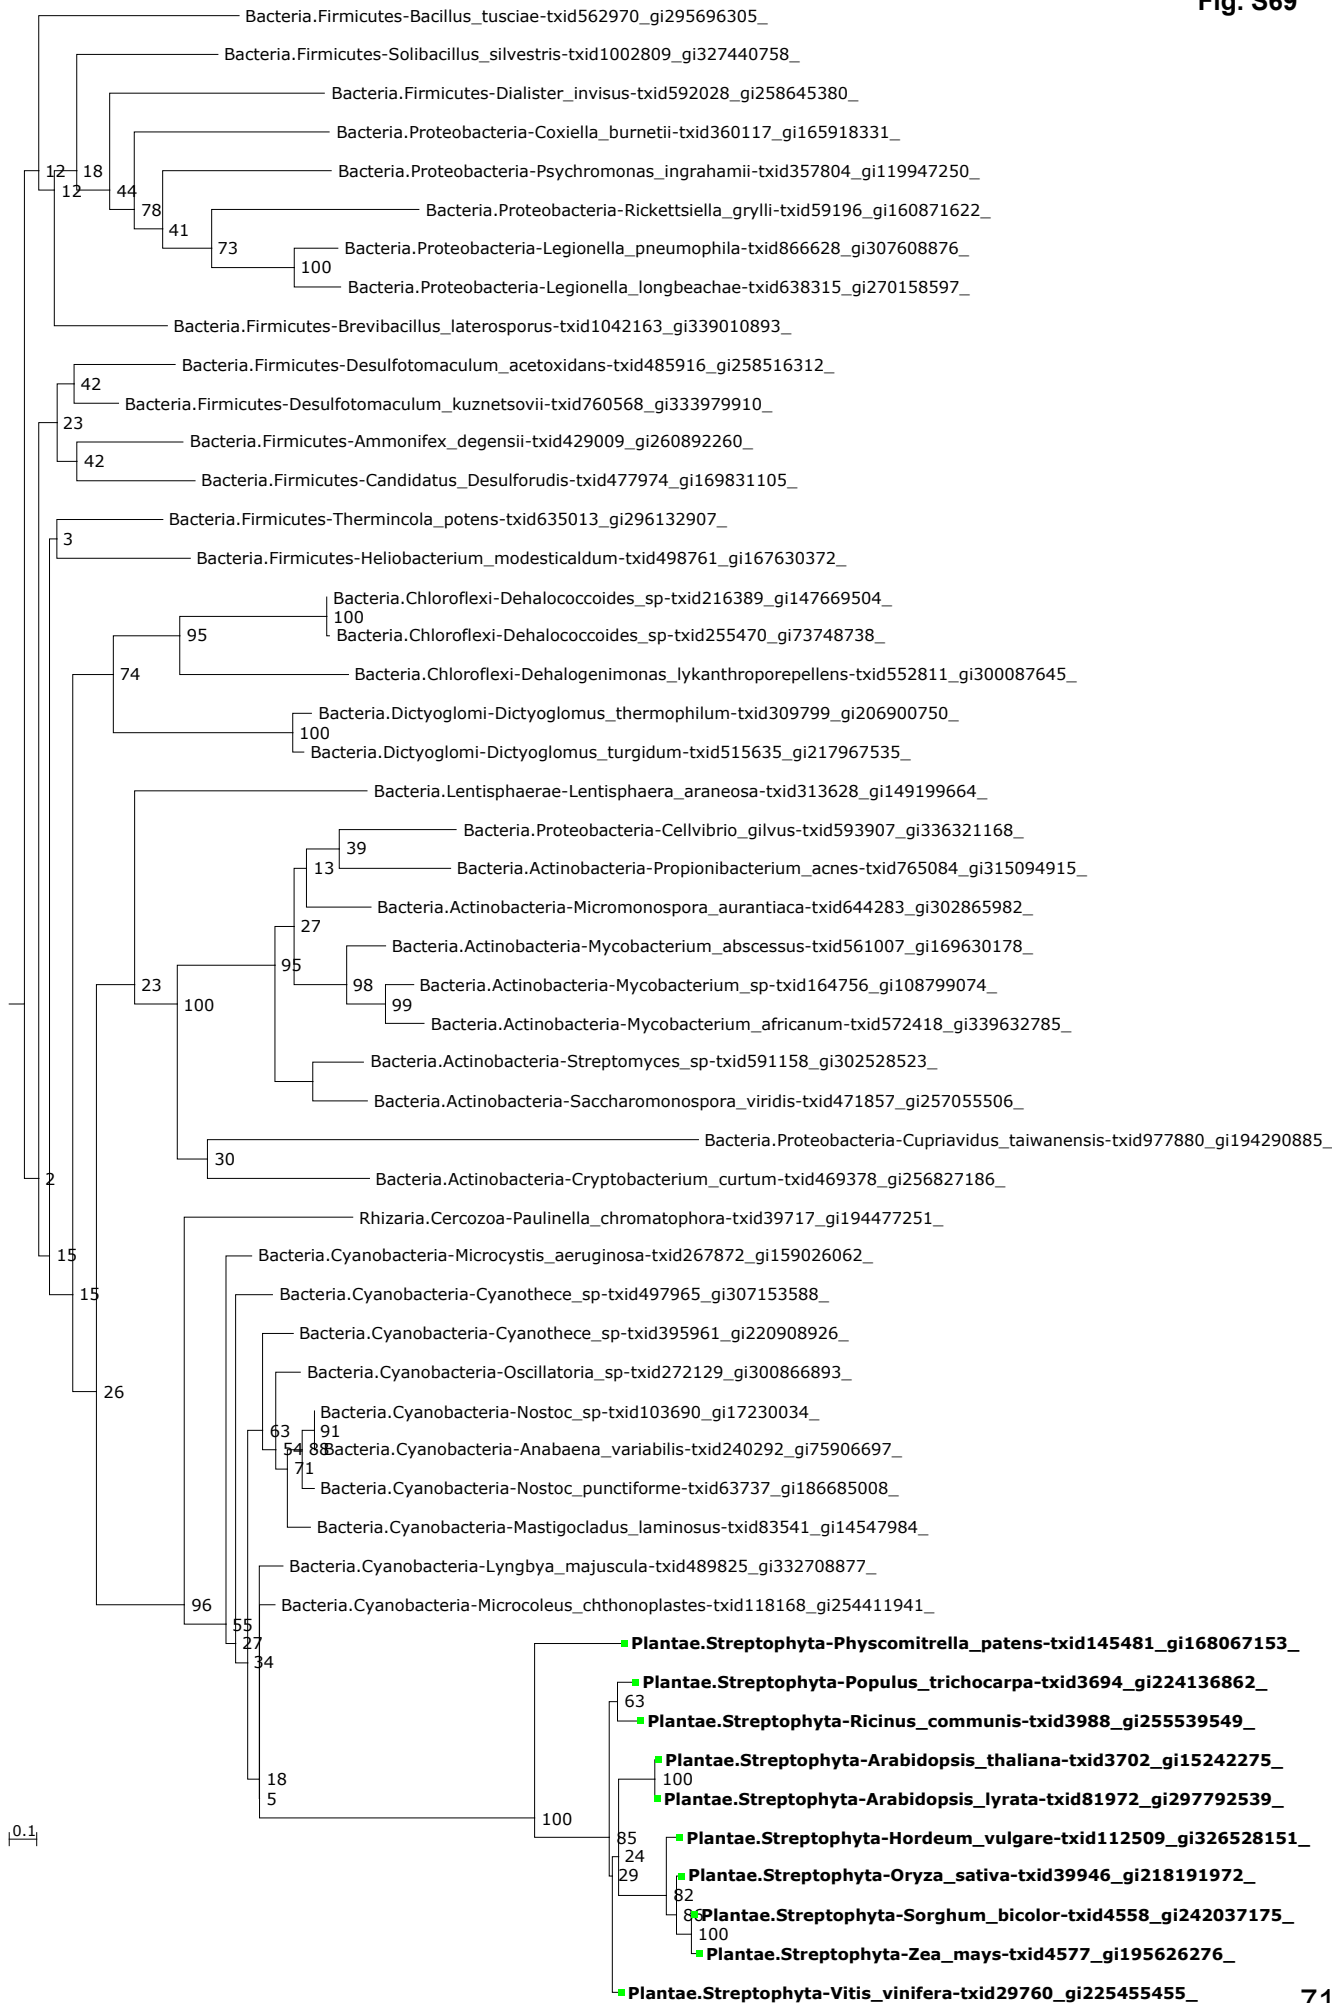

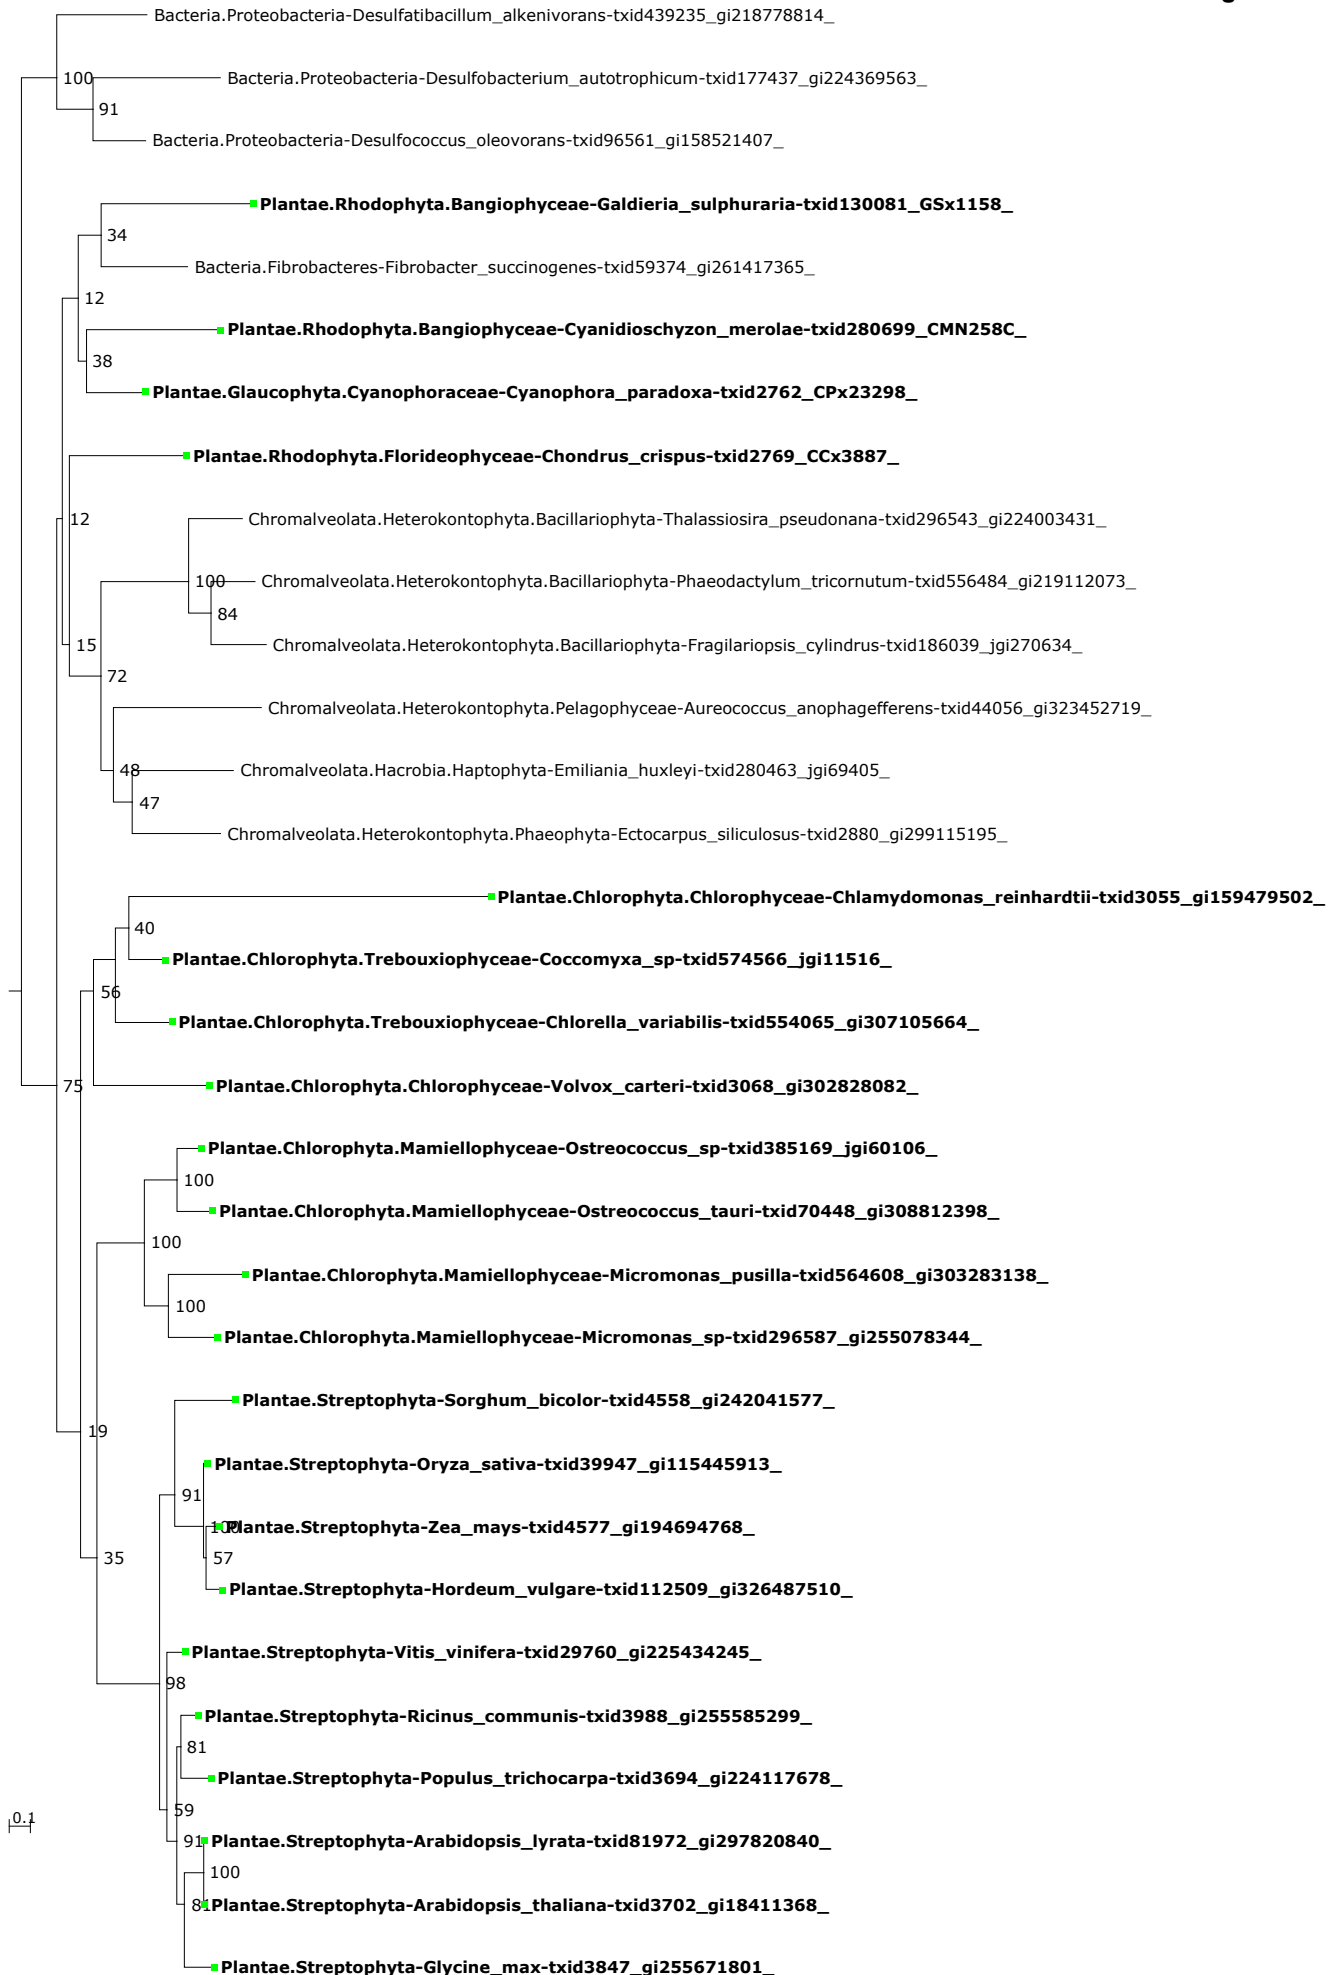



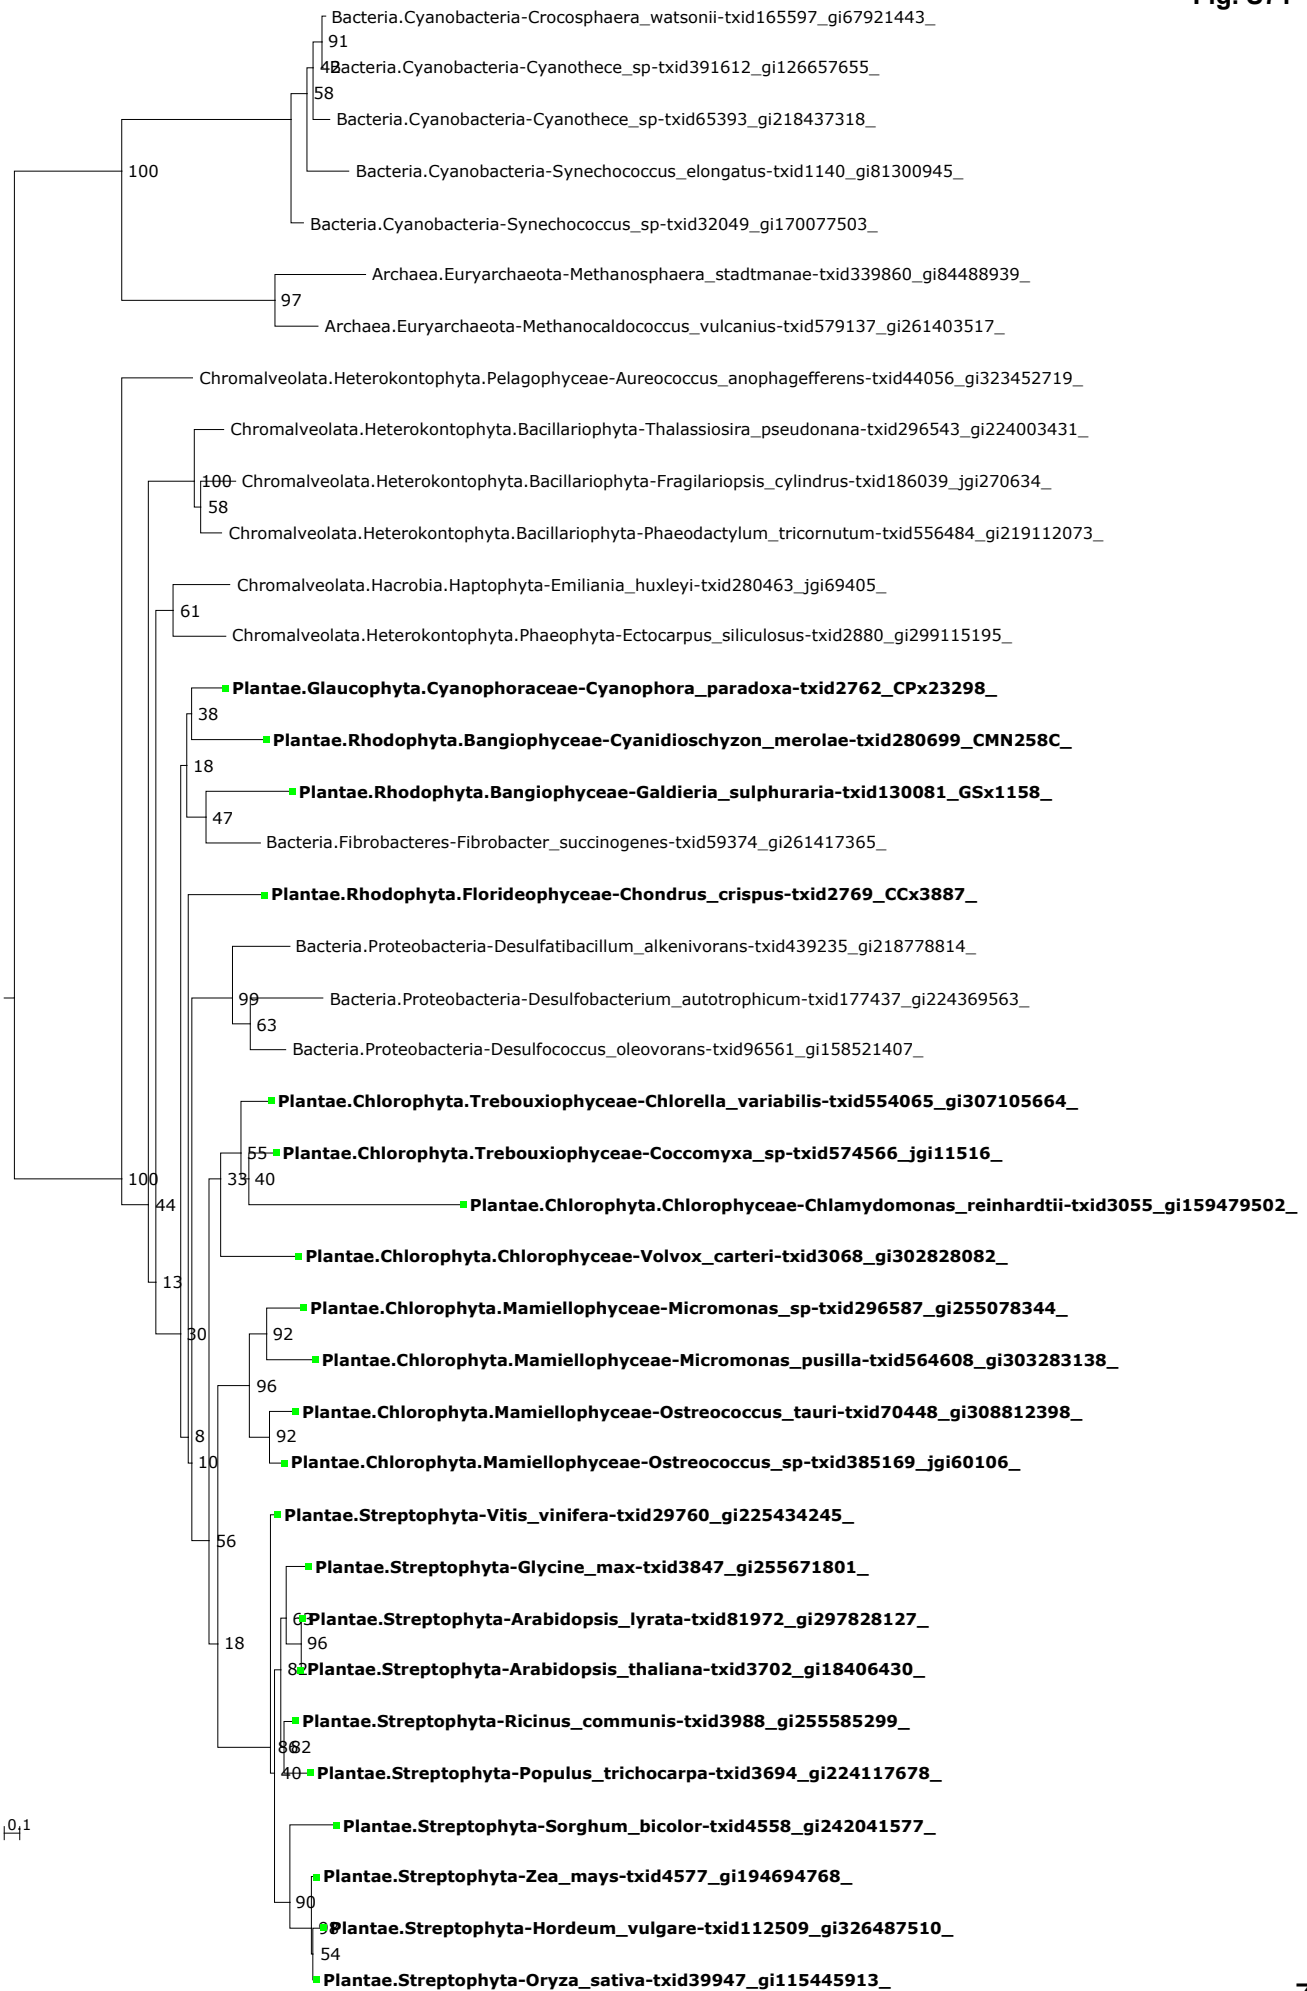

0,1

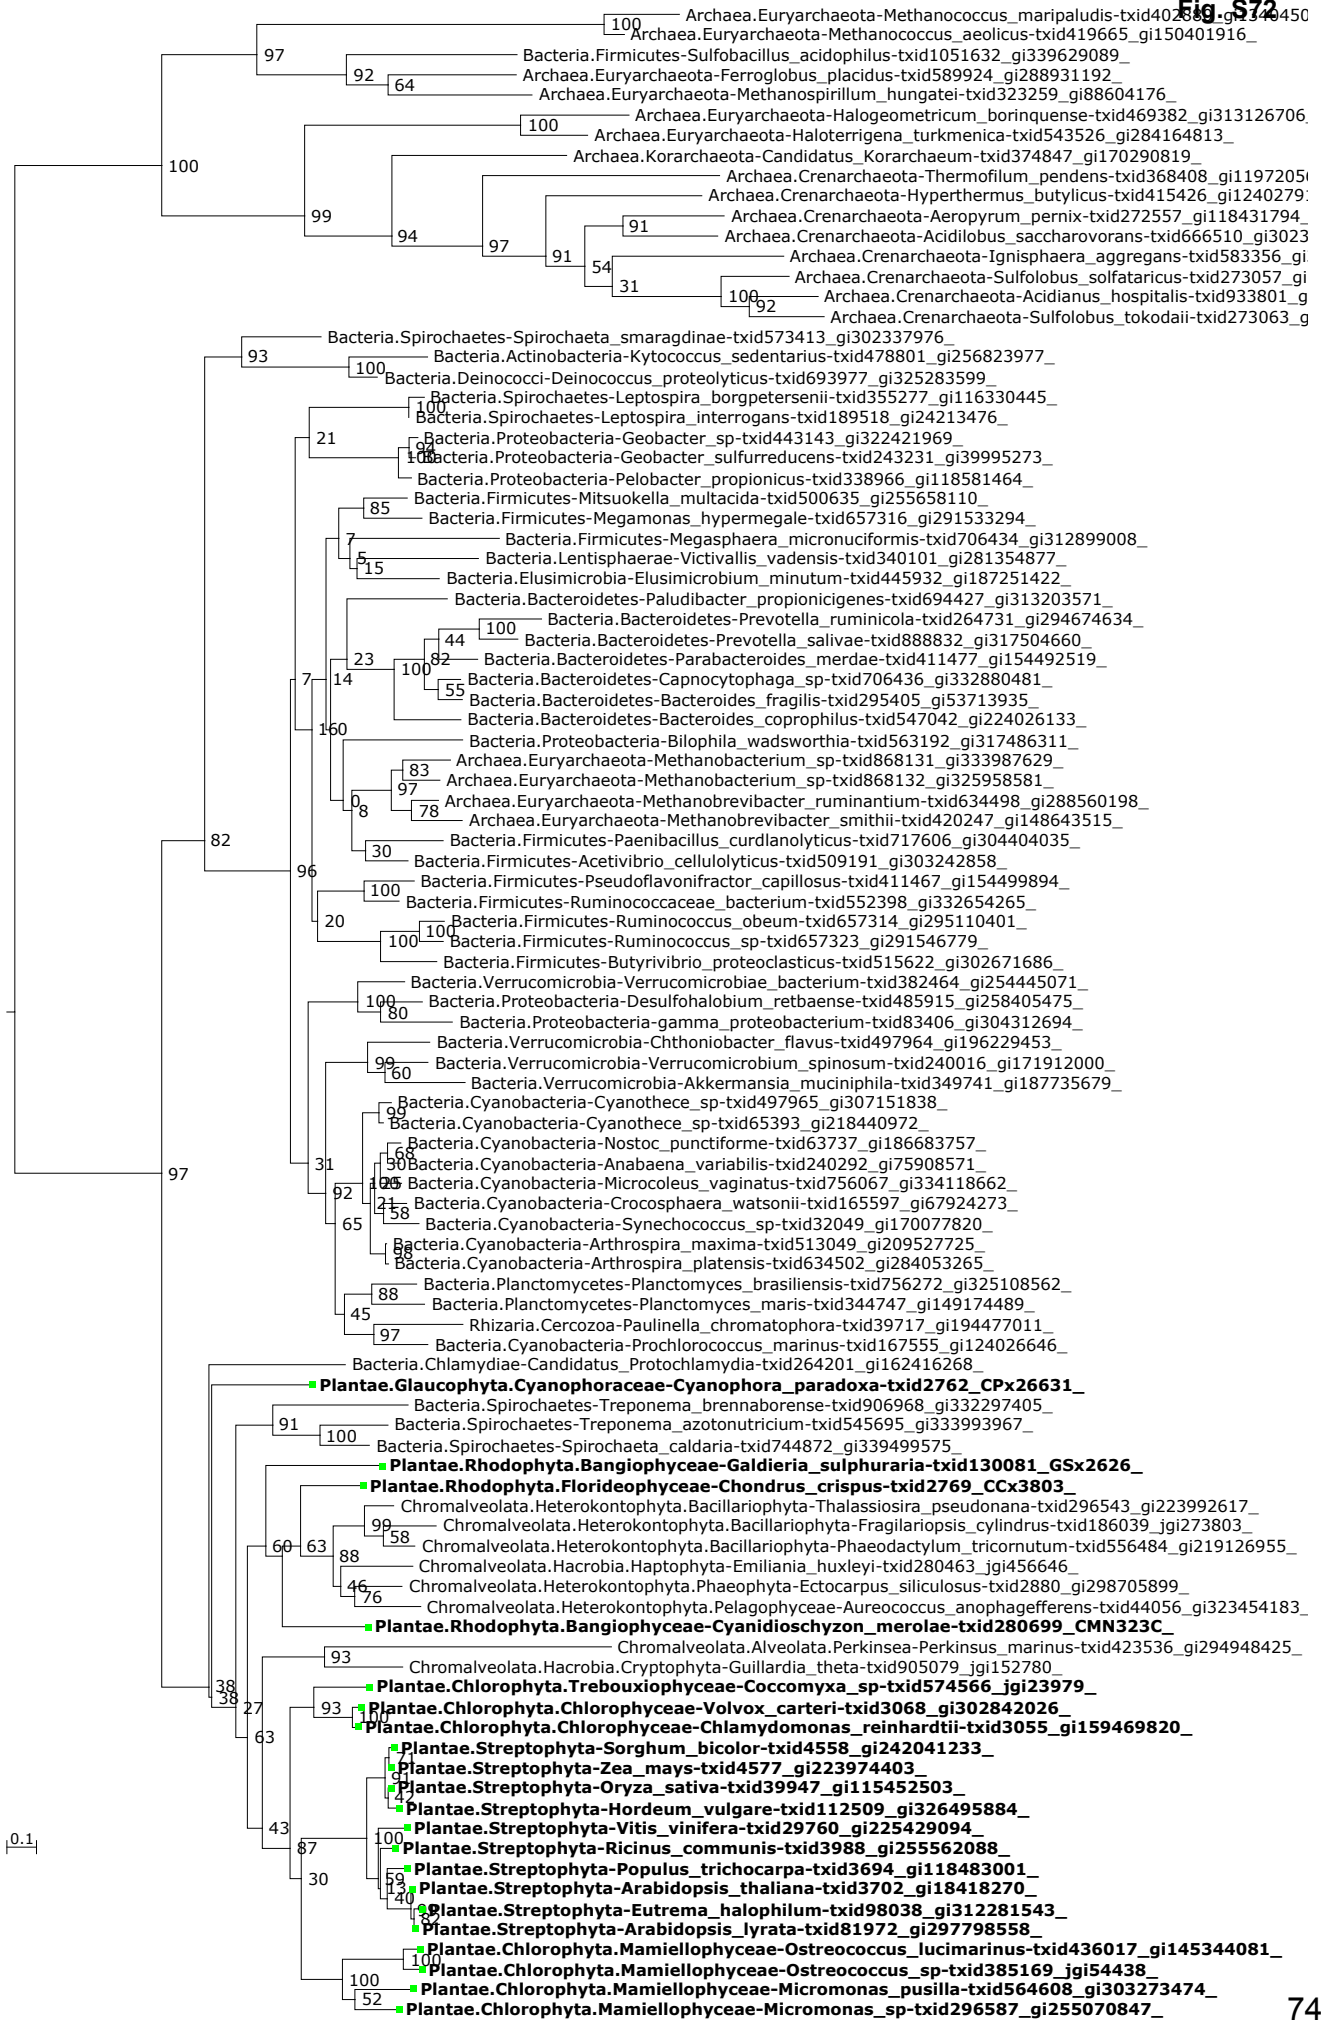

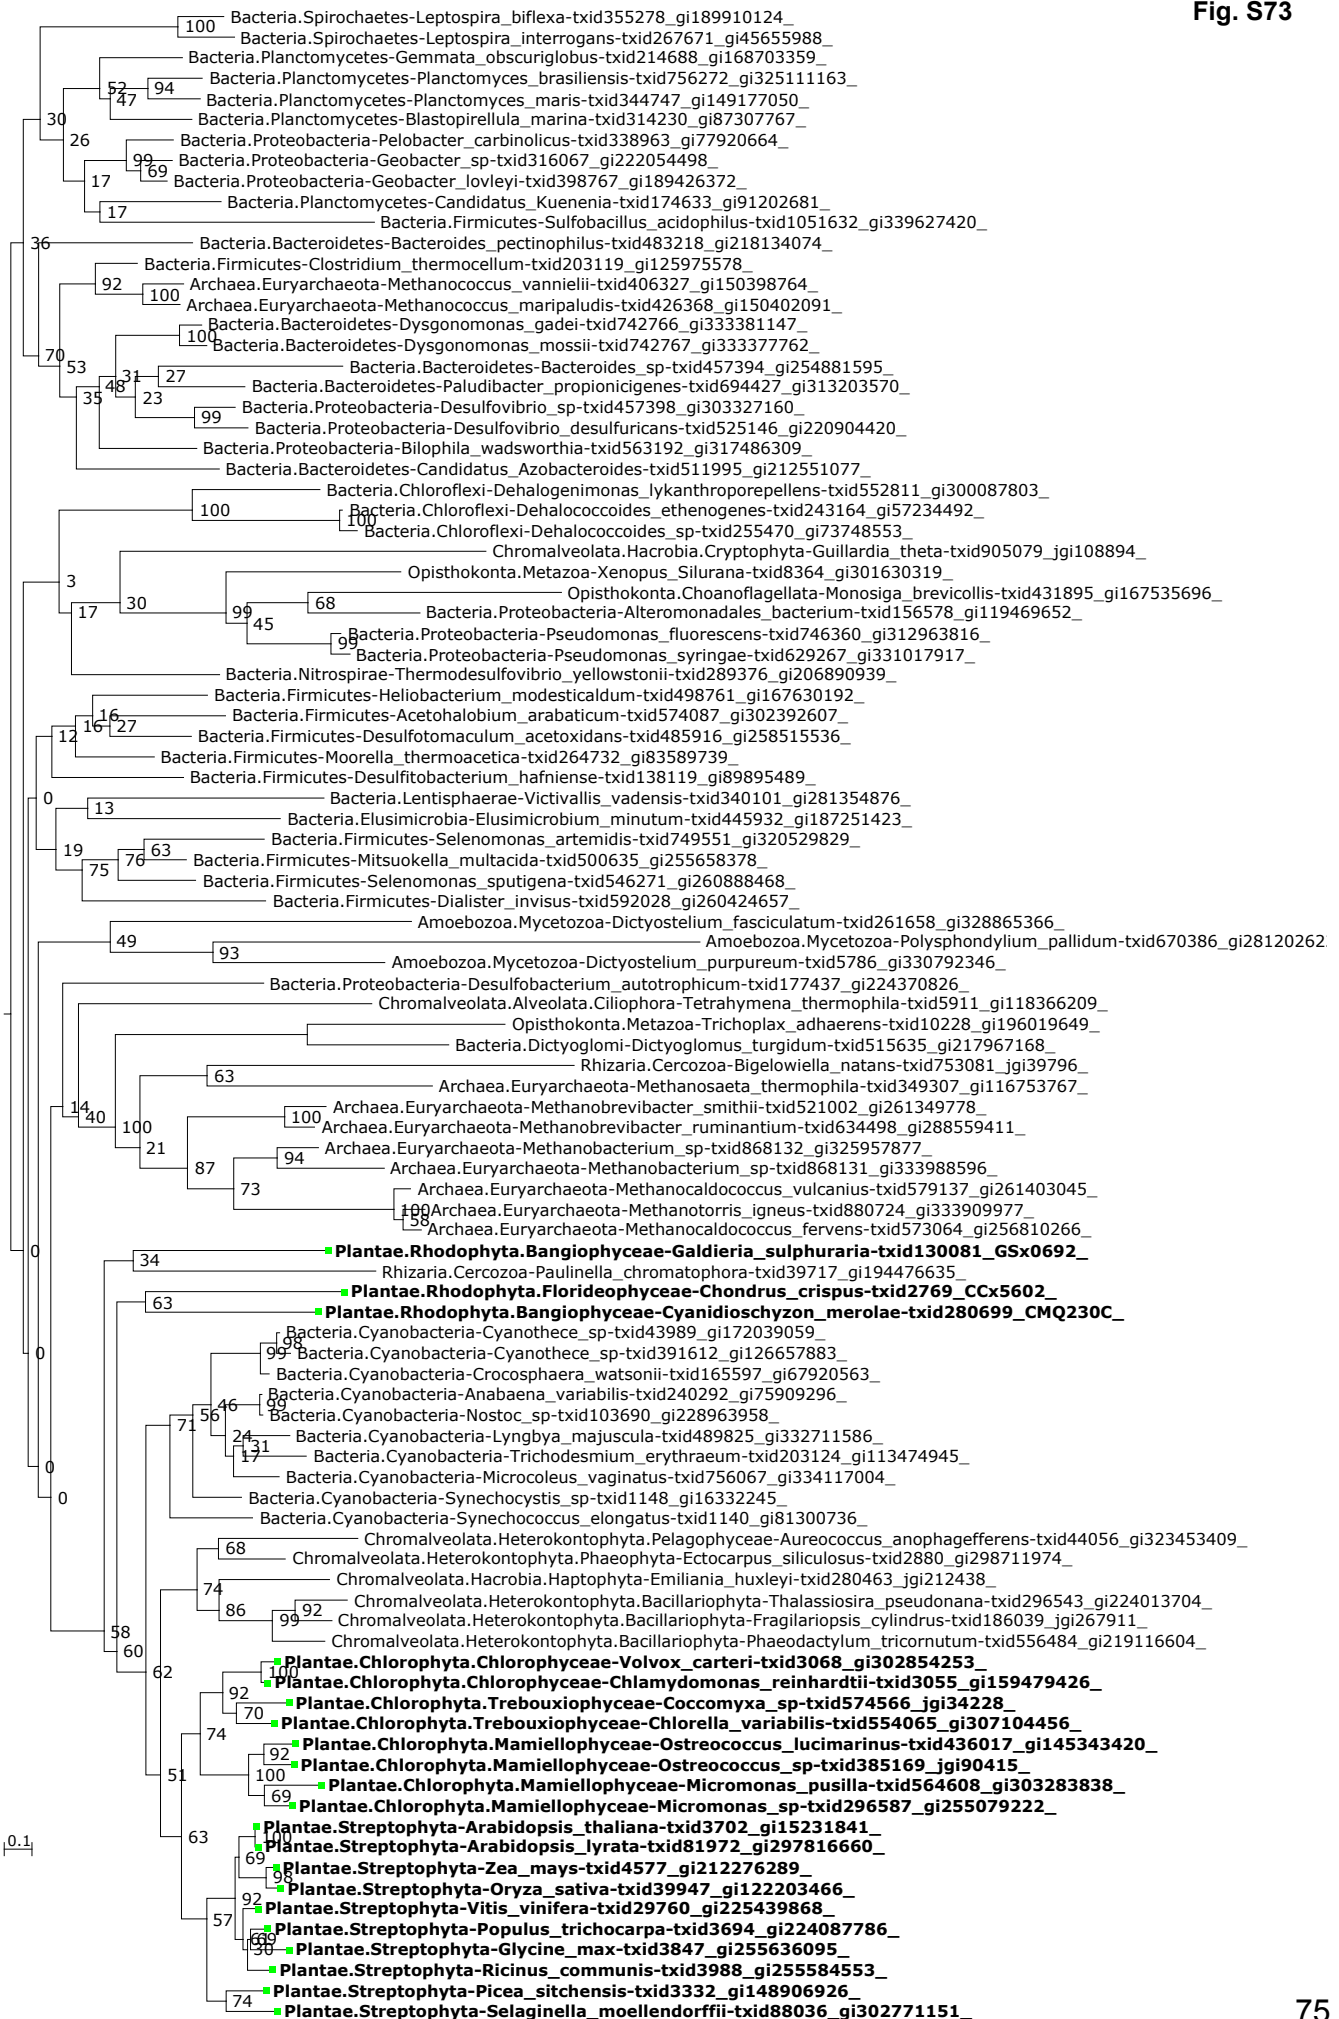

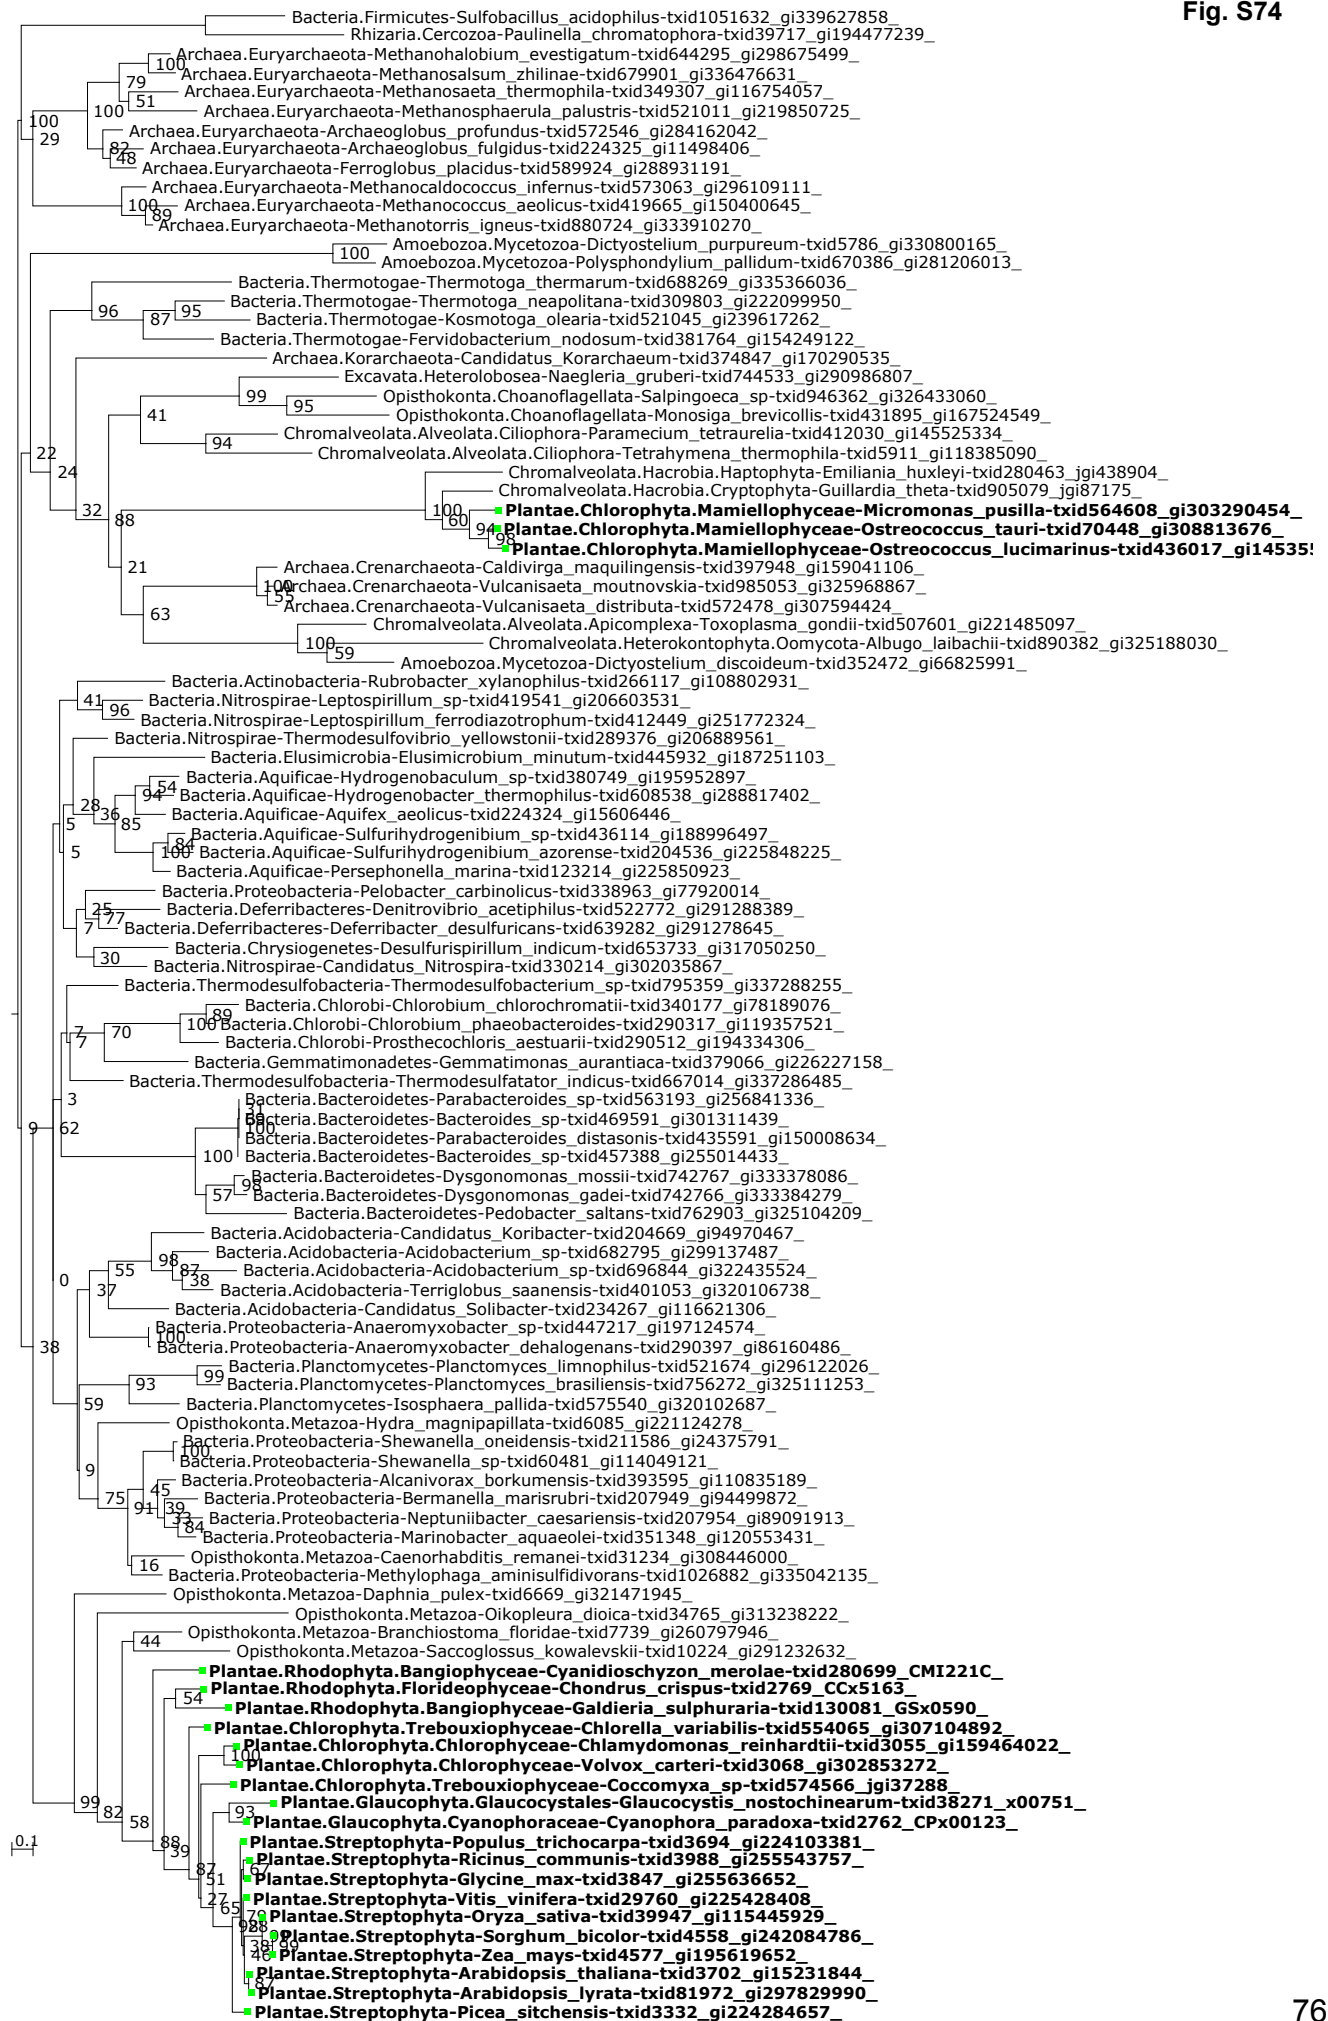

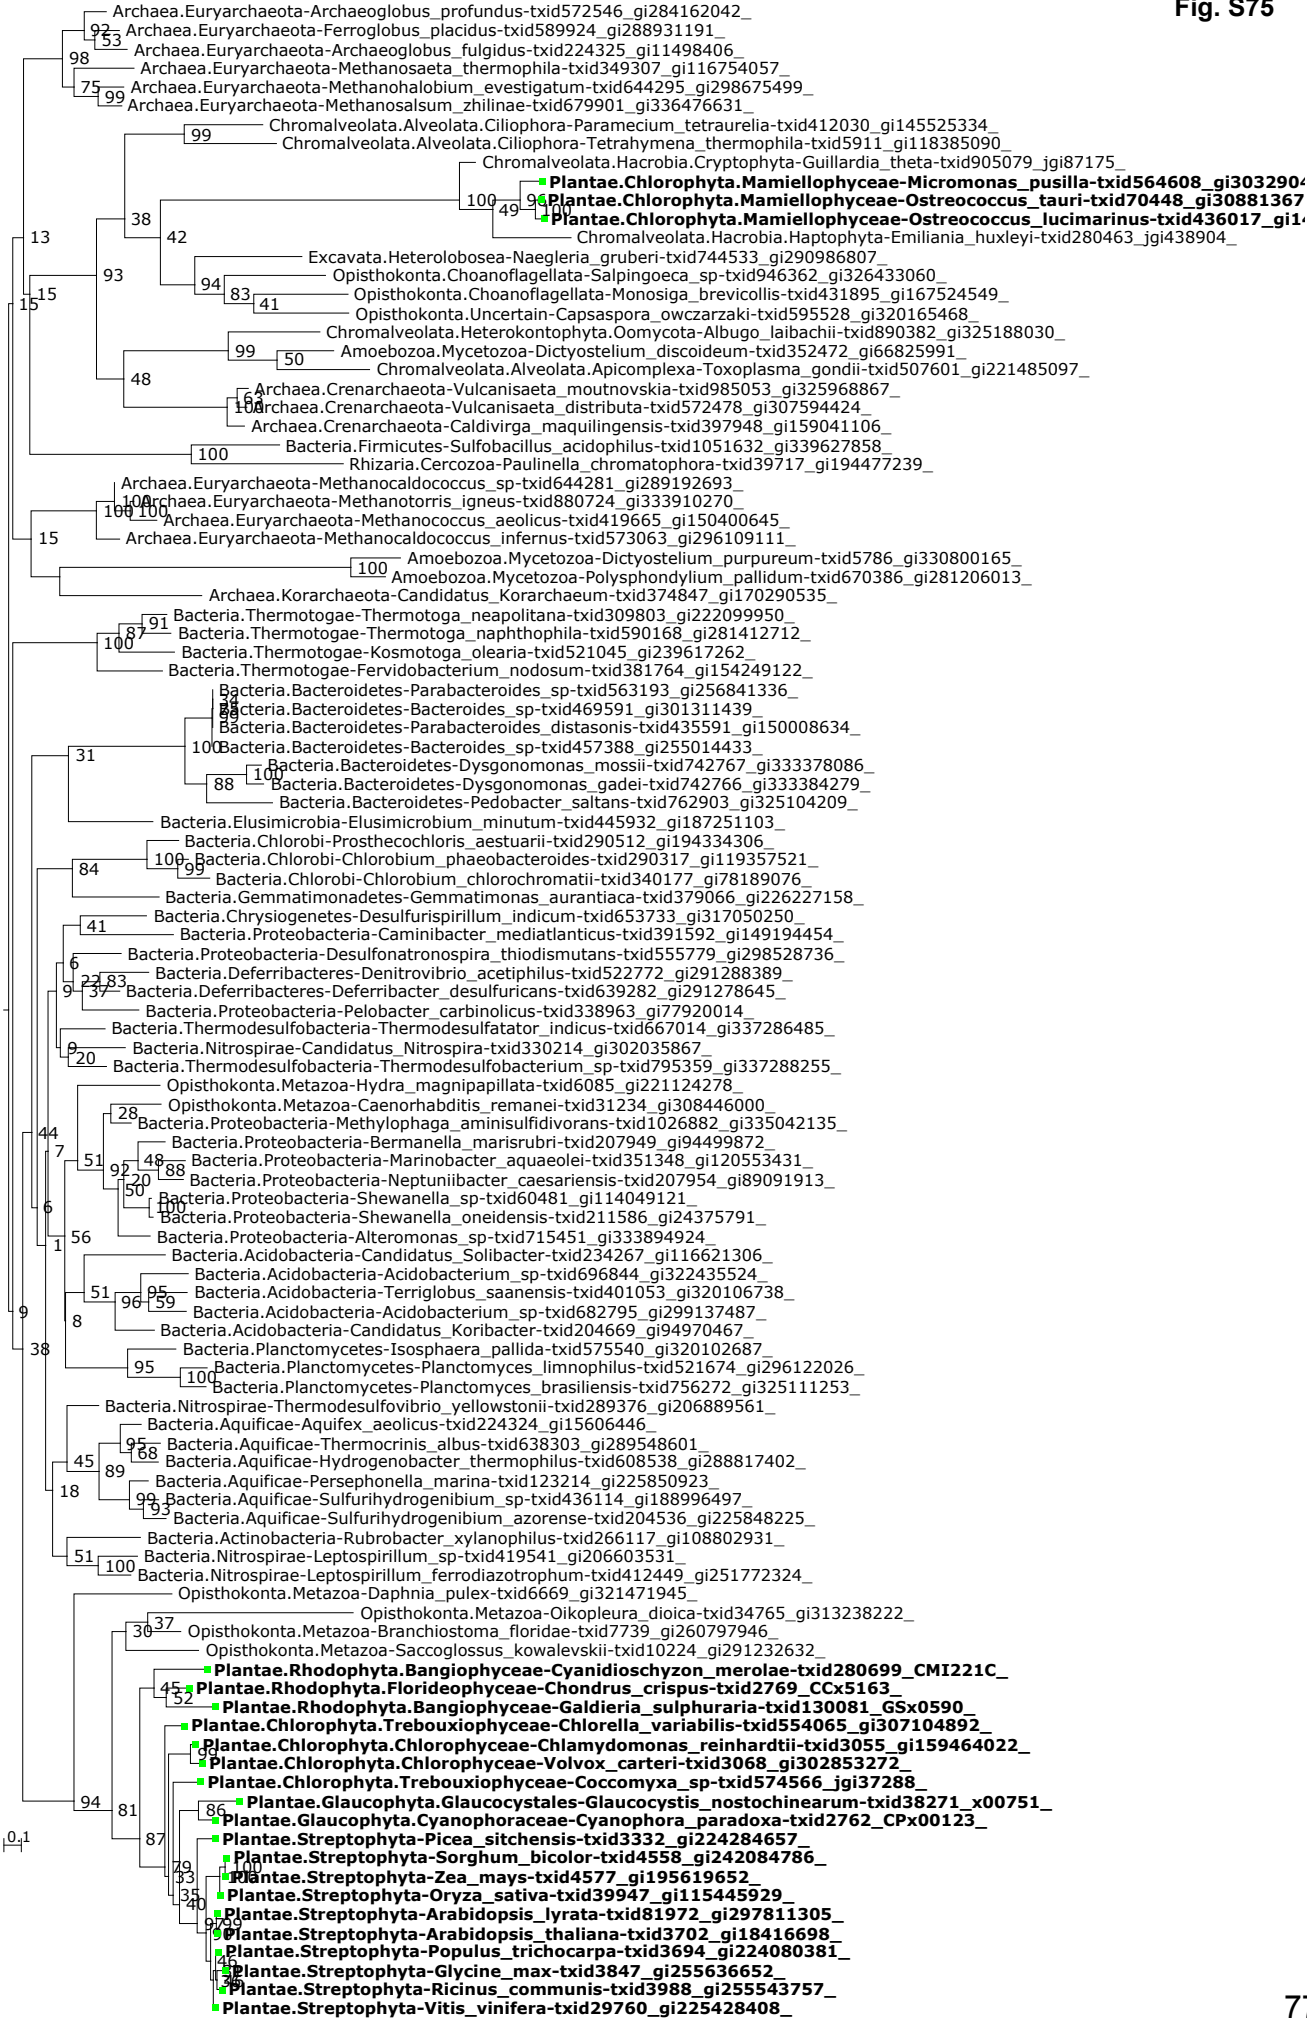

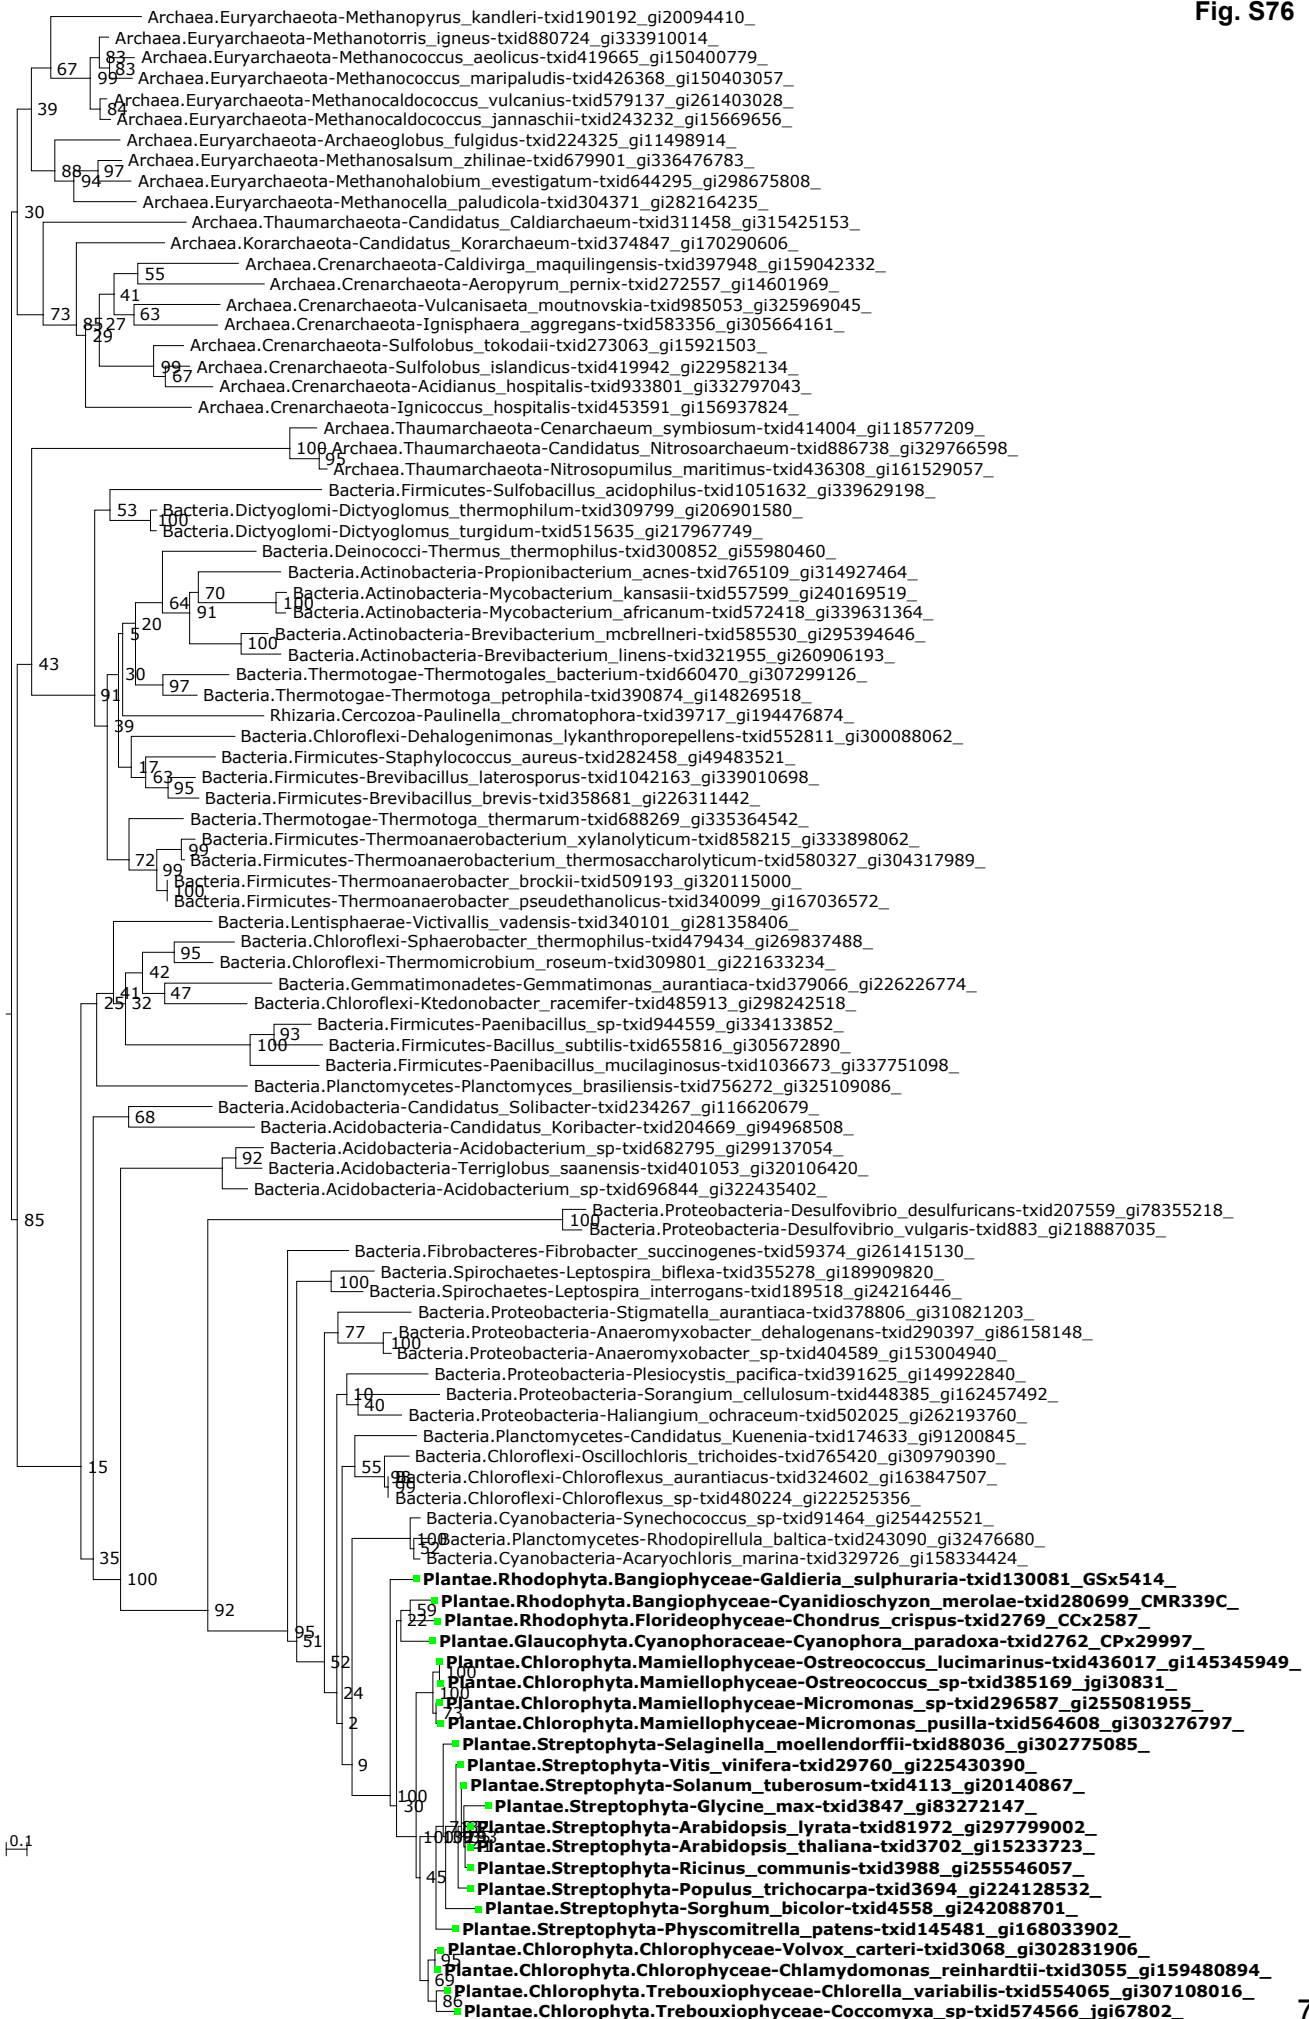

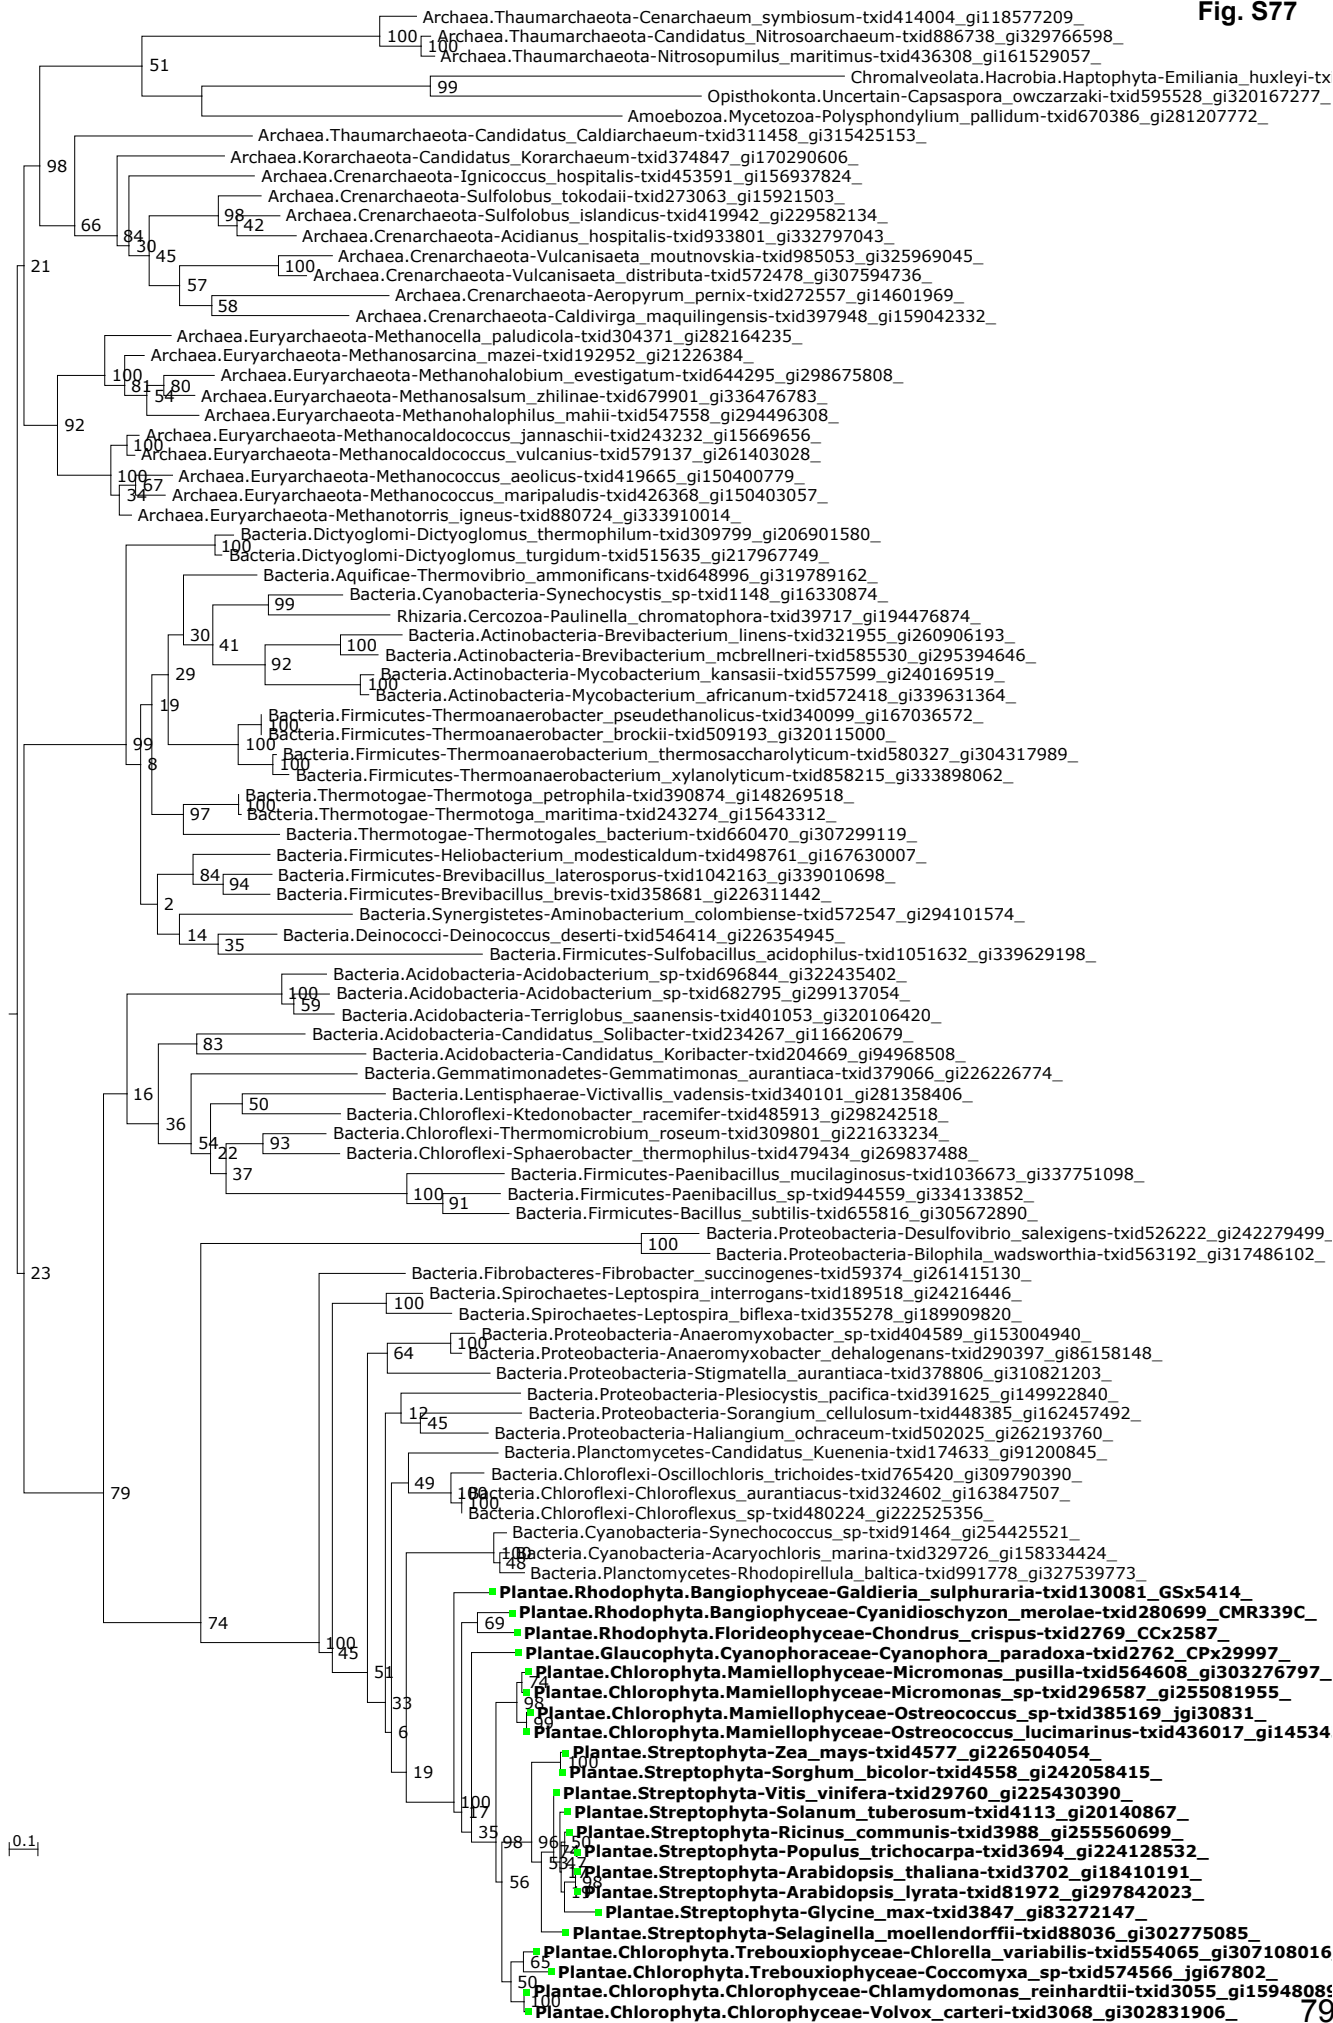

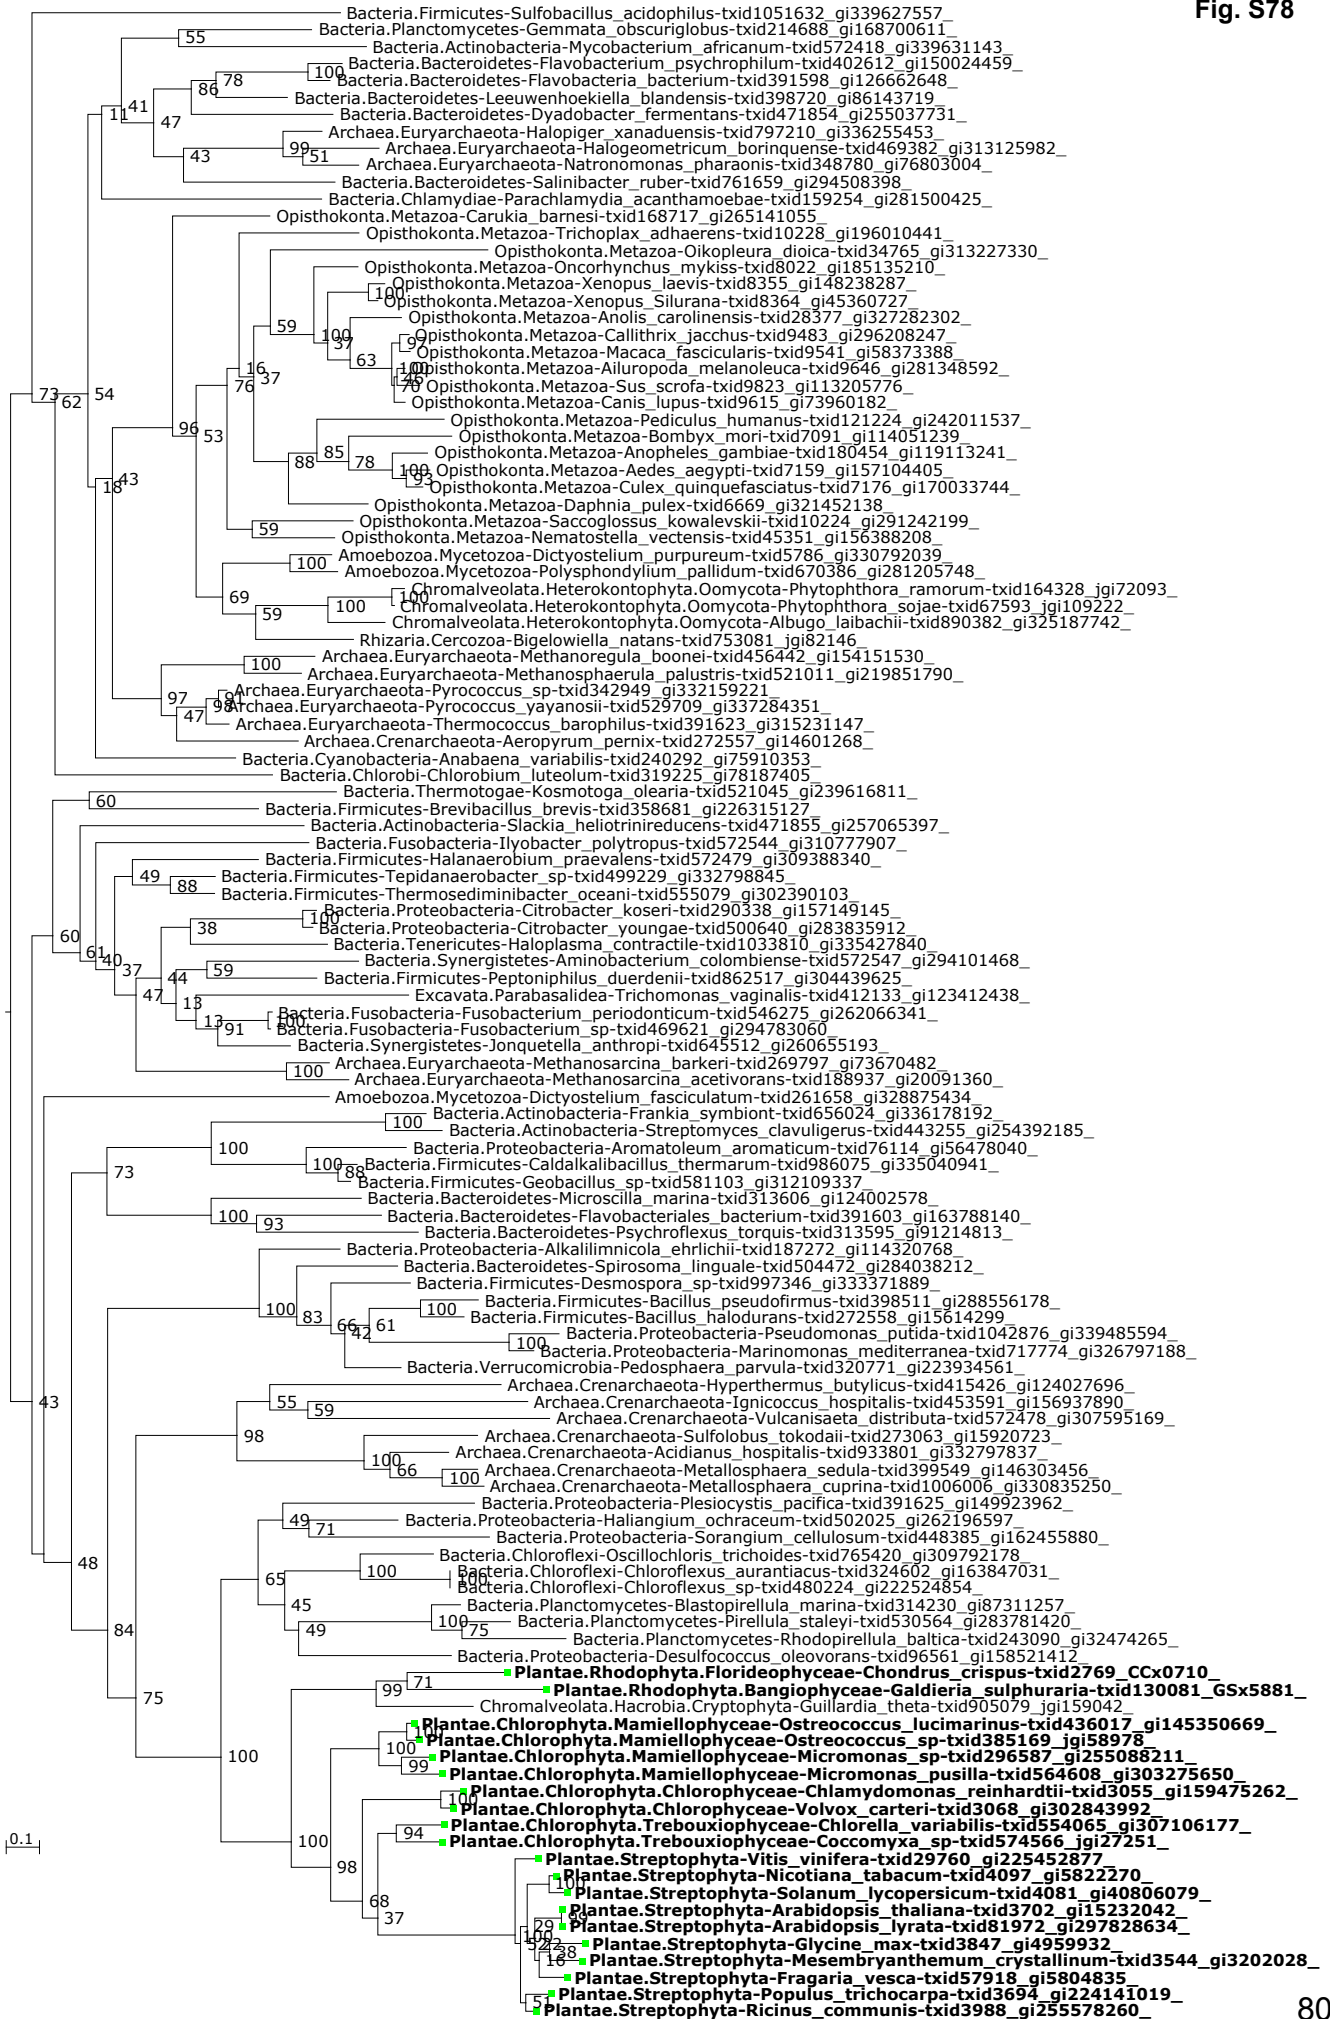



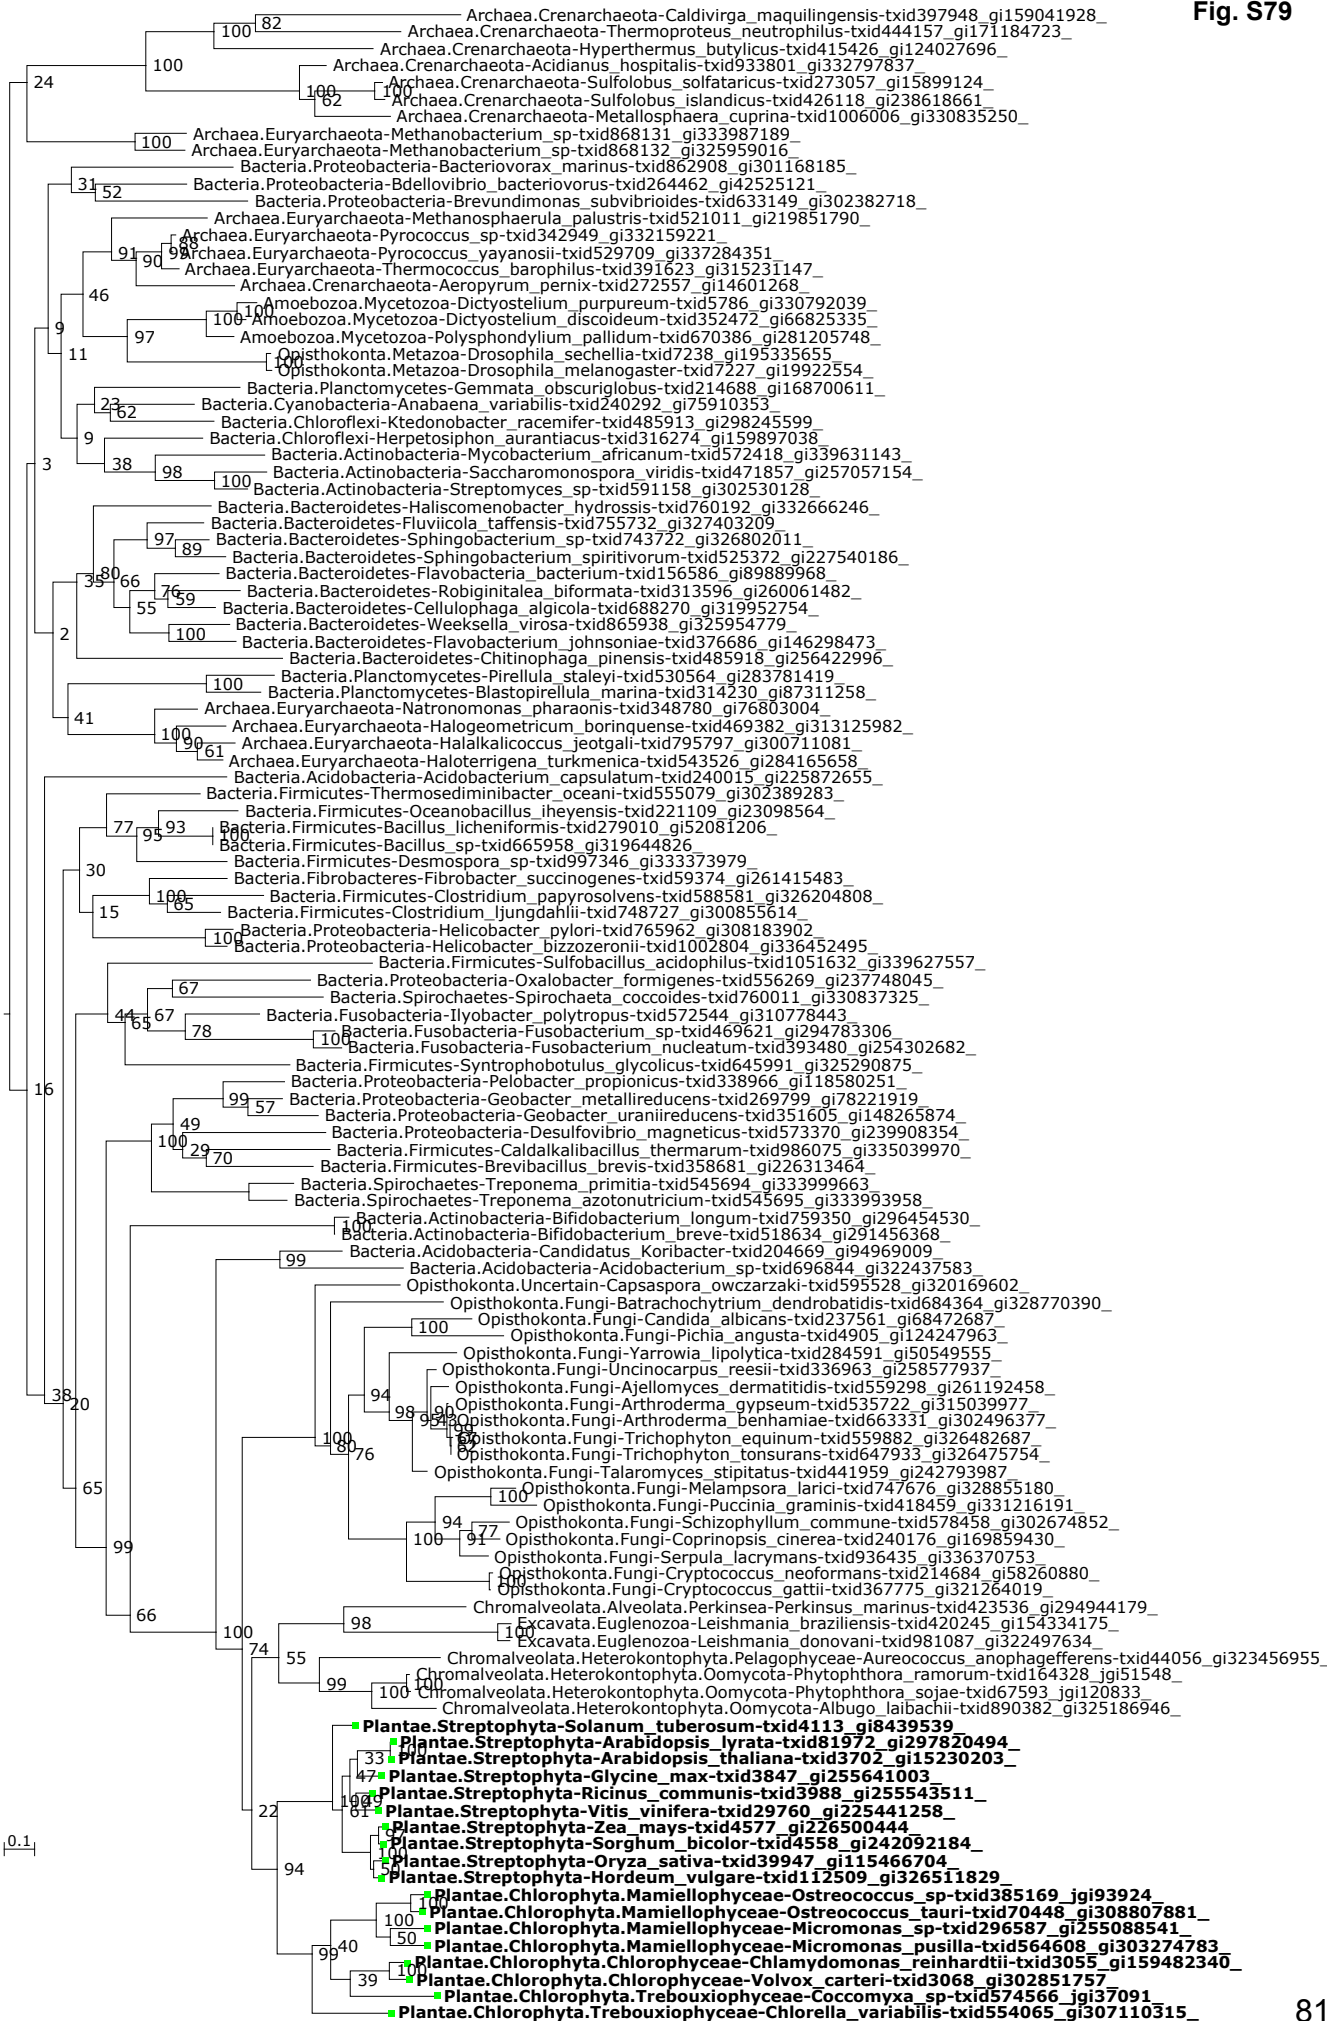

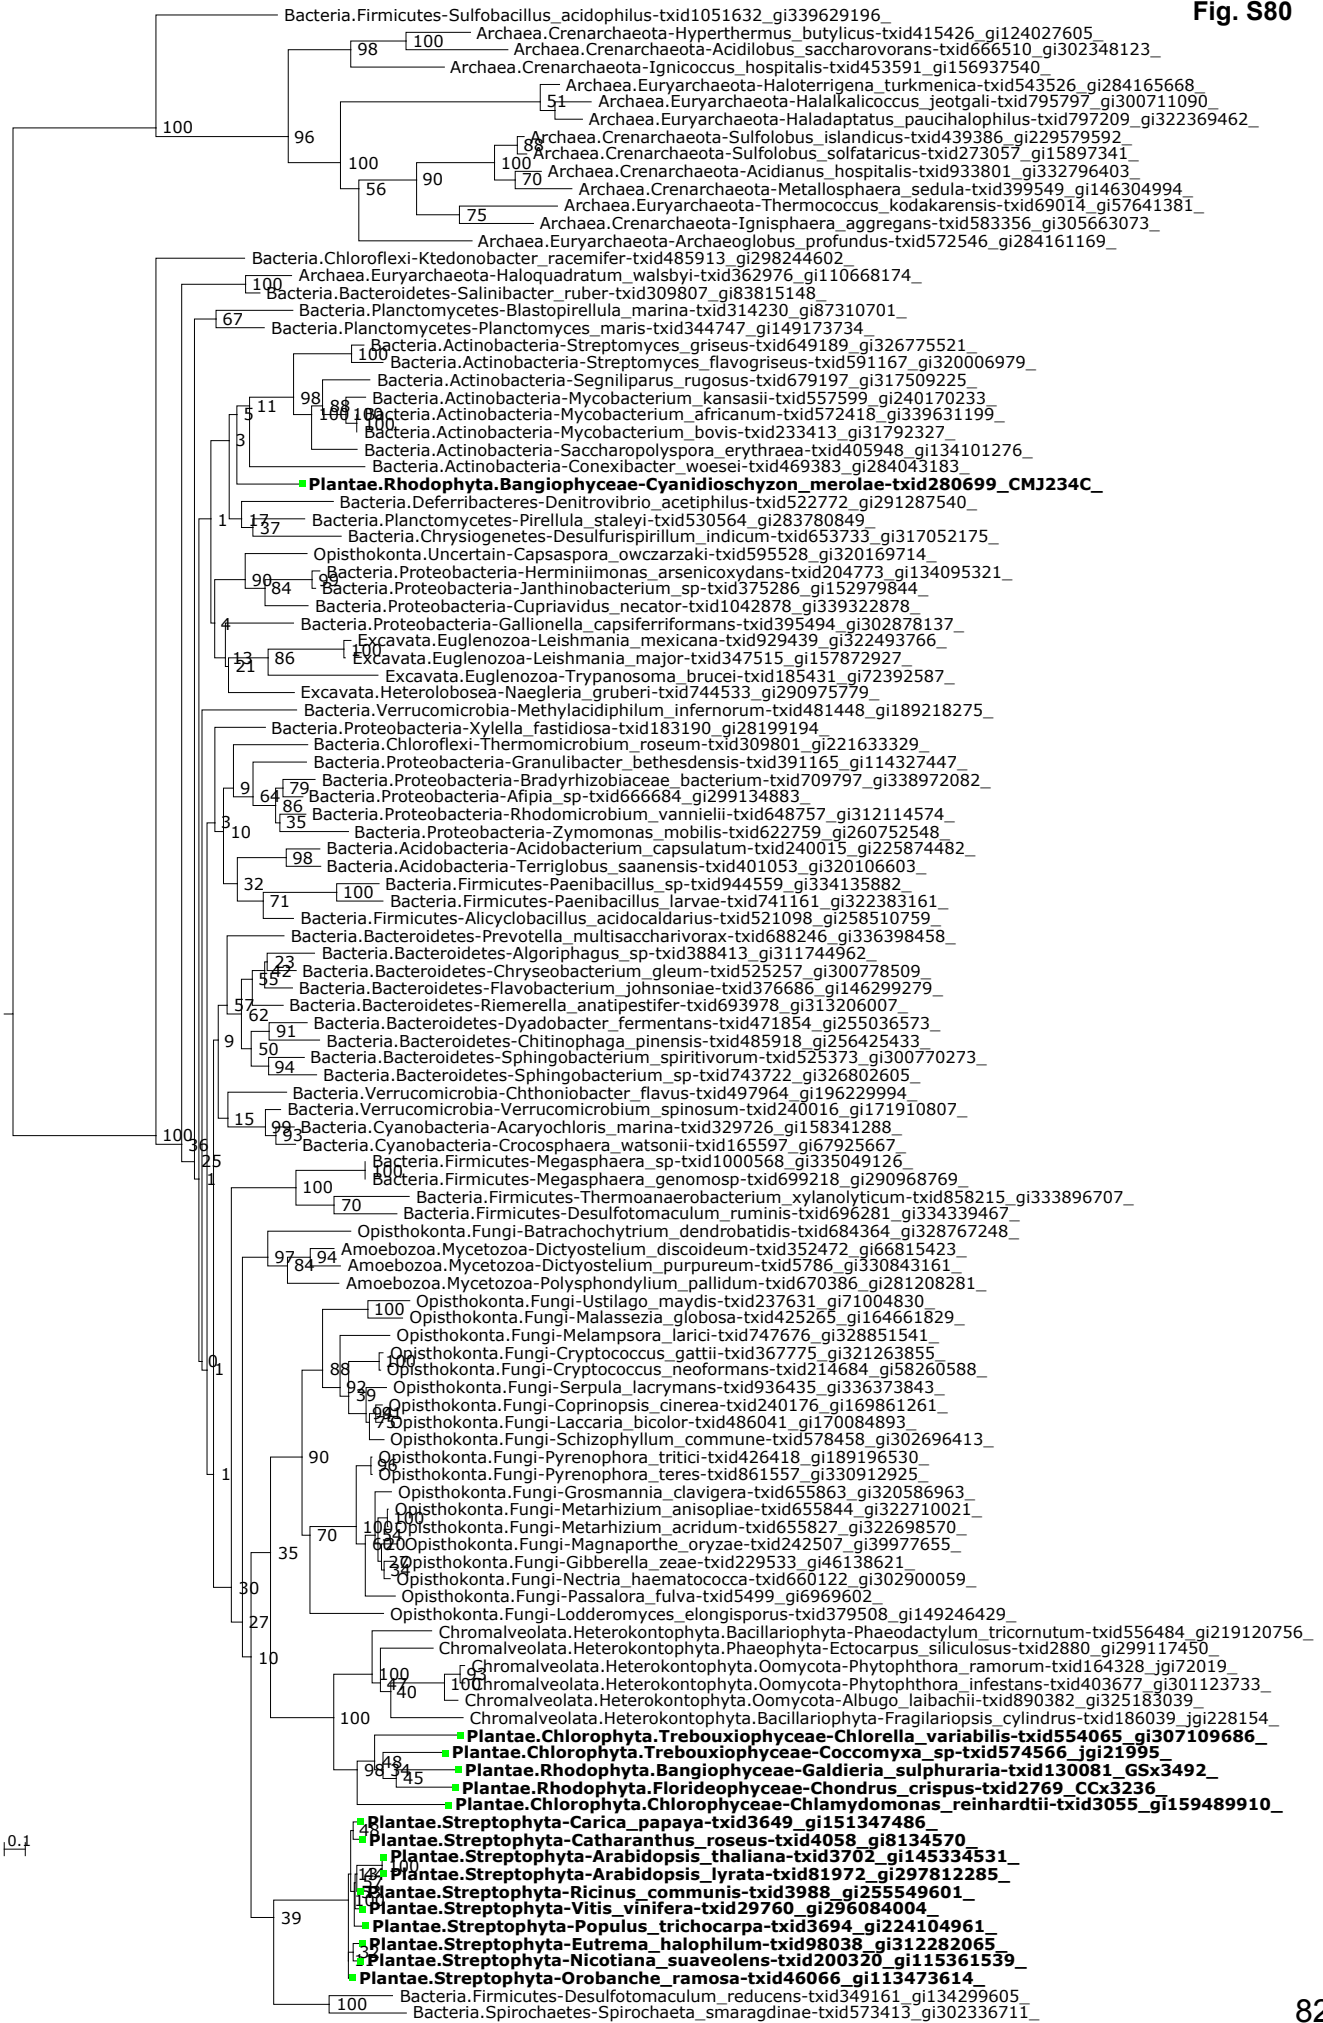

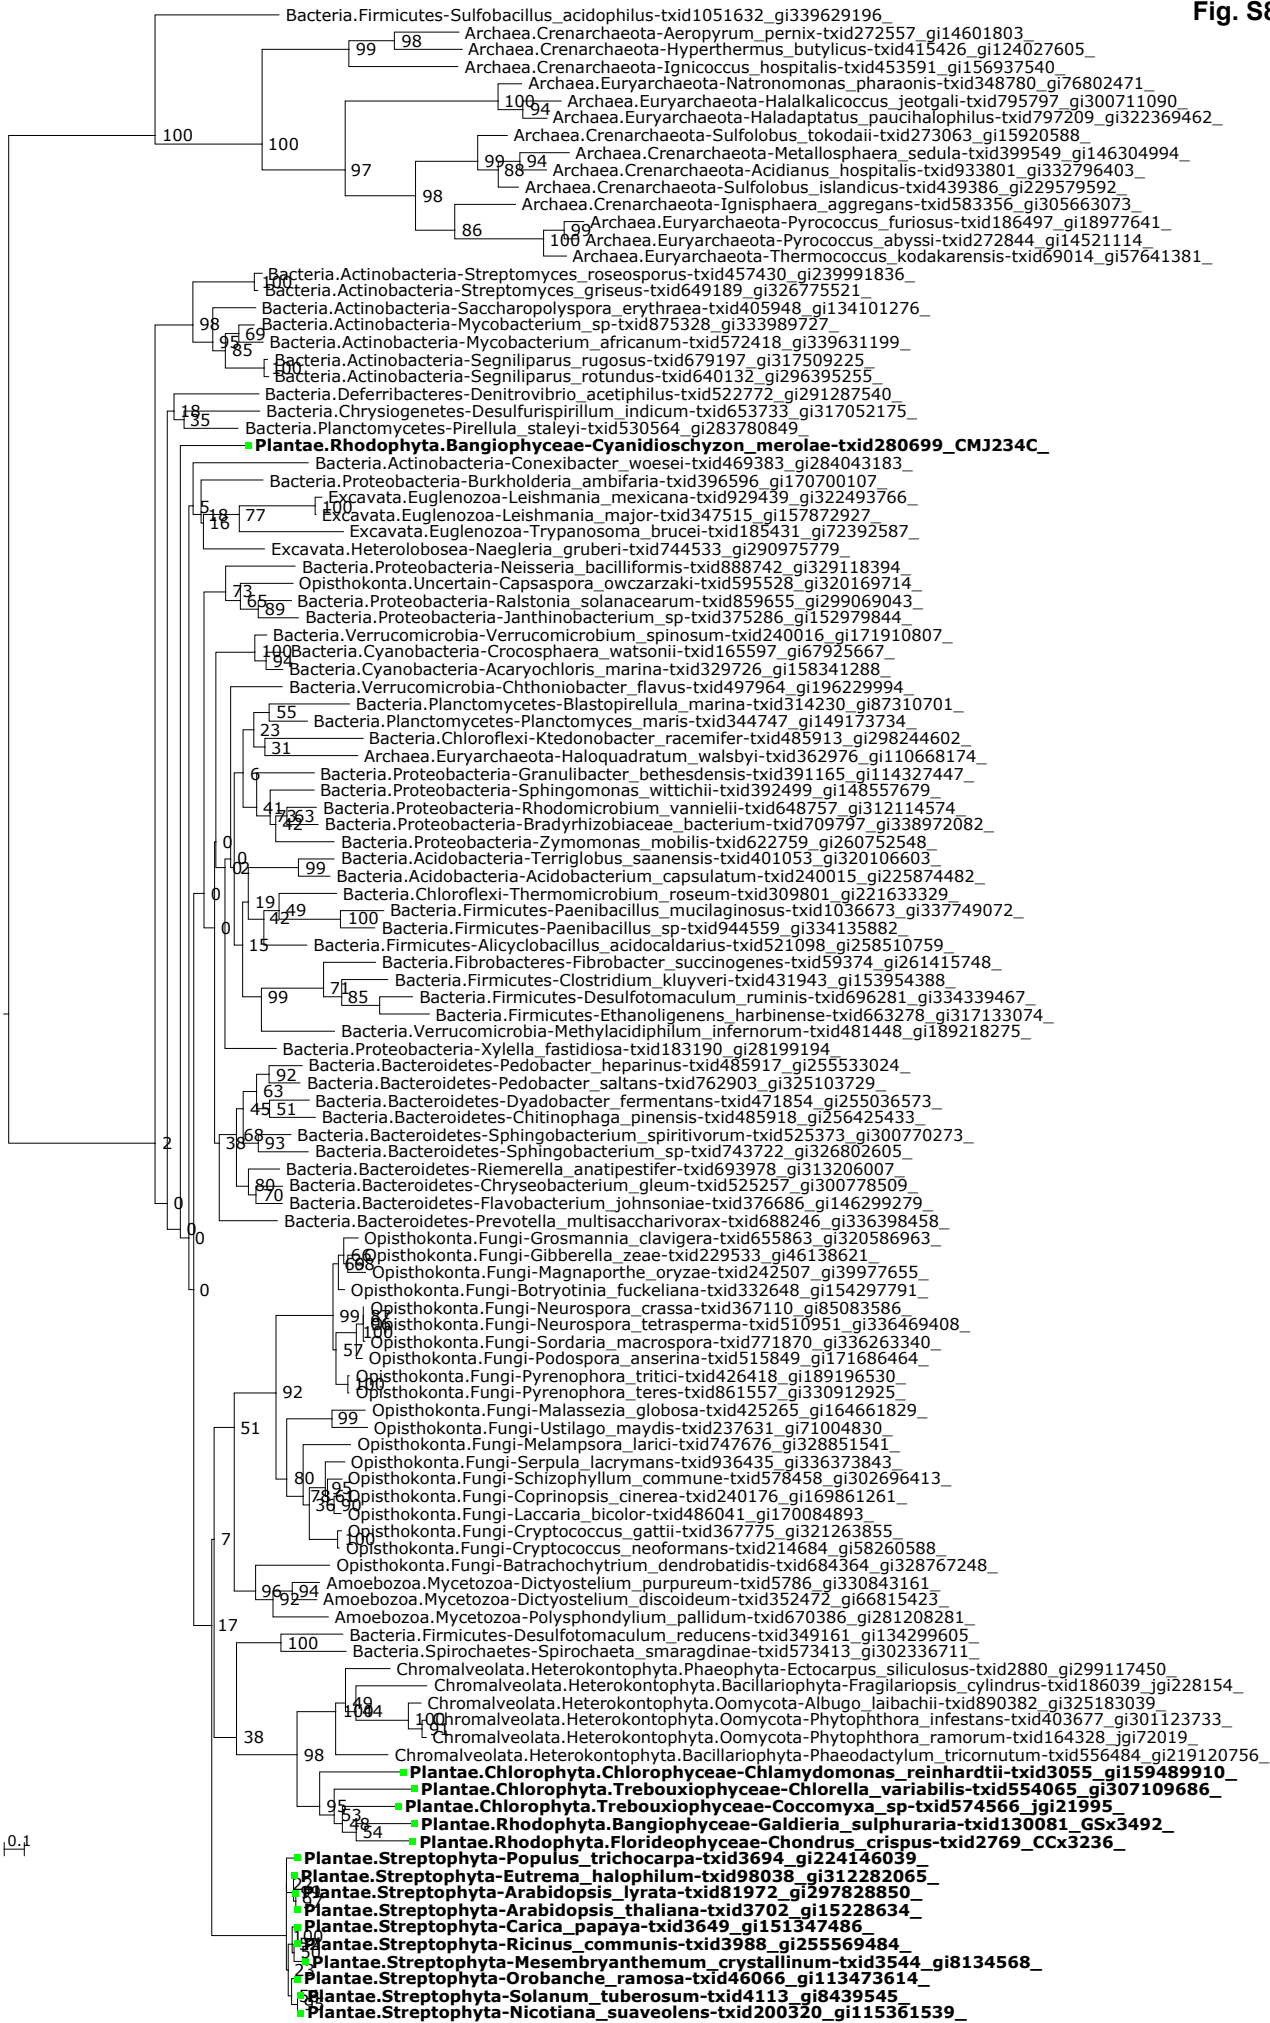

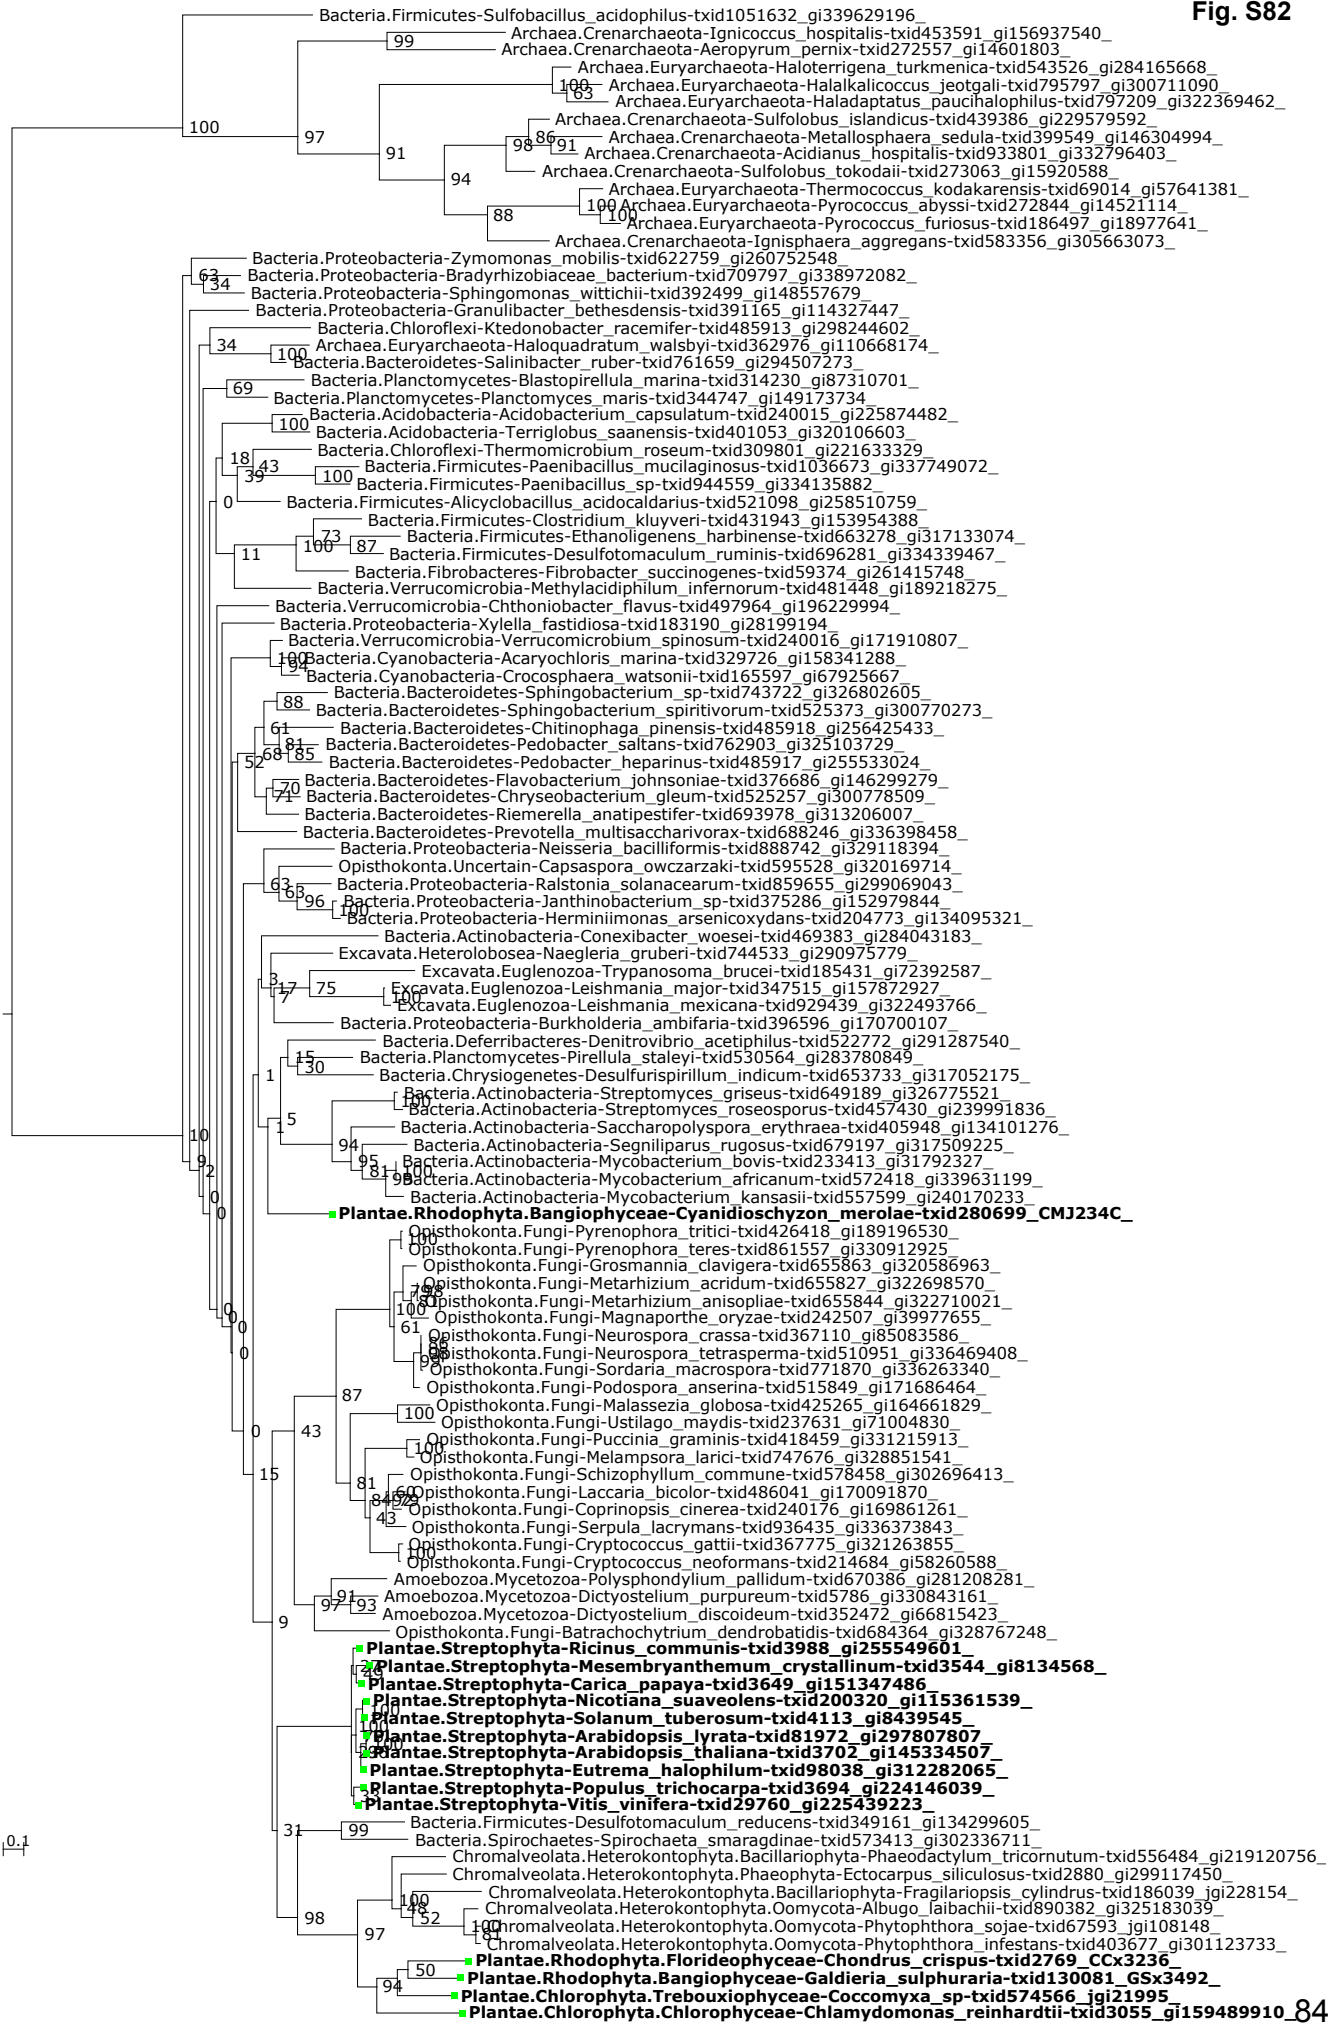

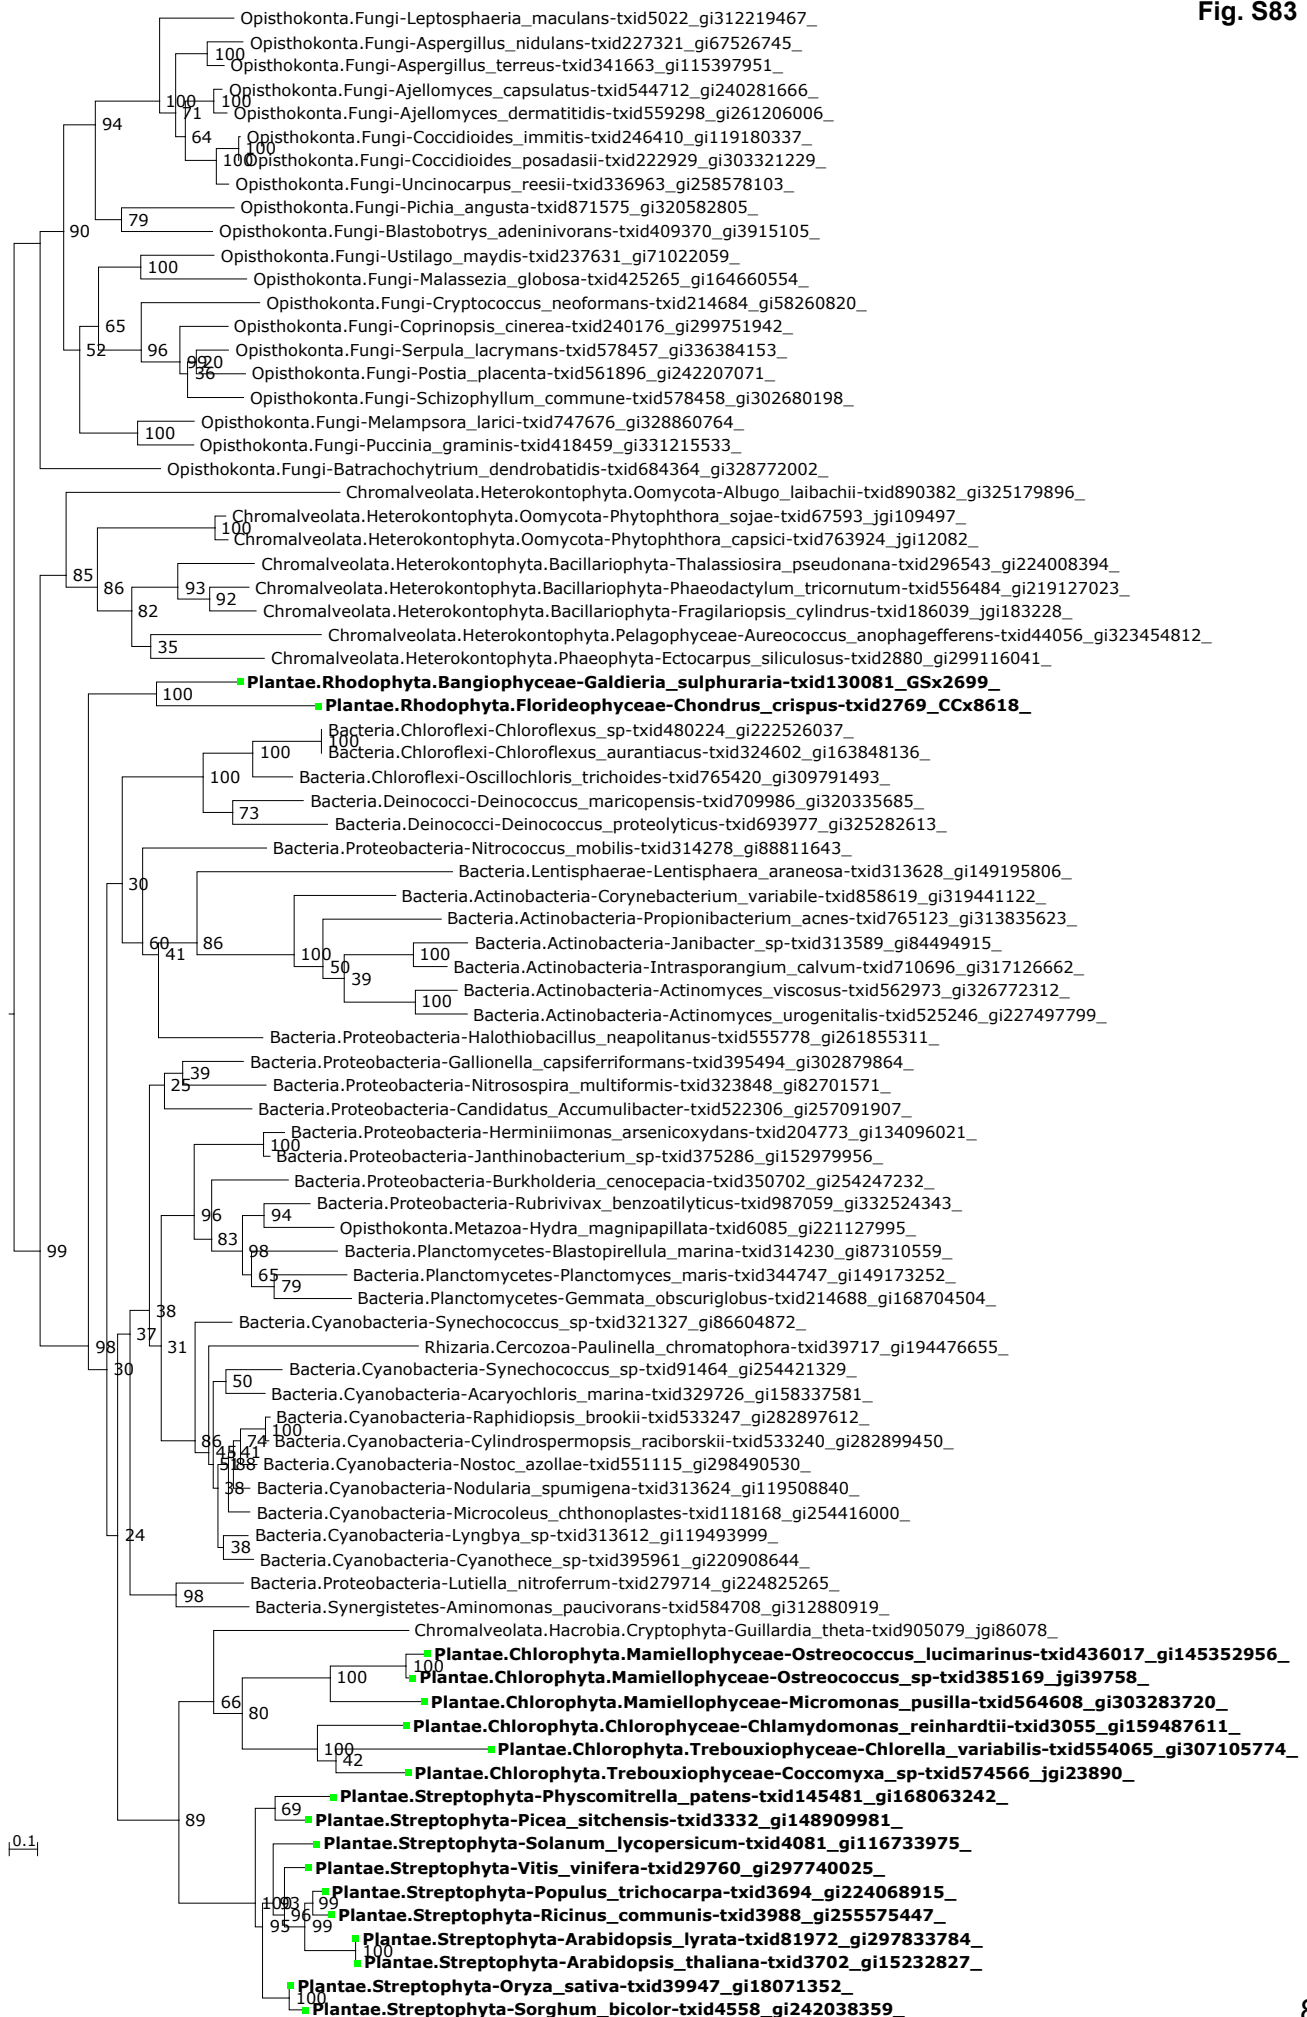

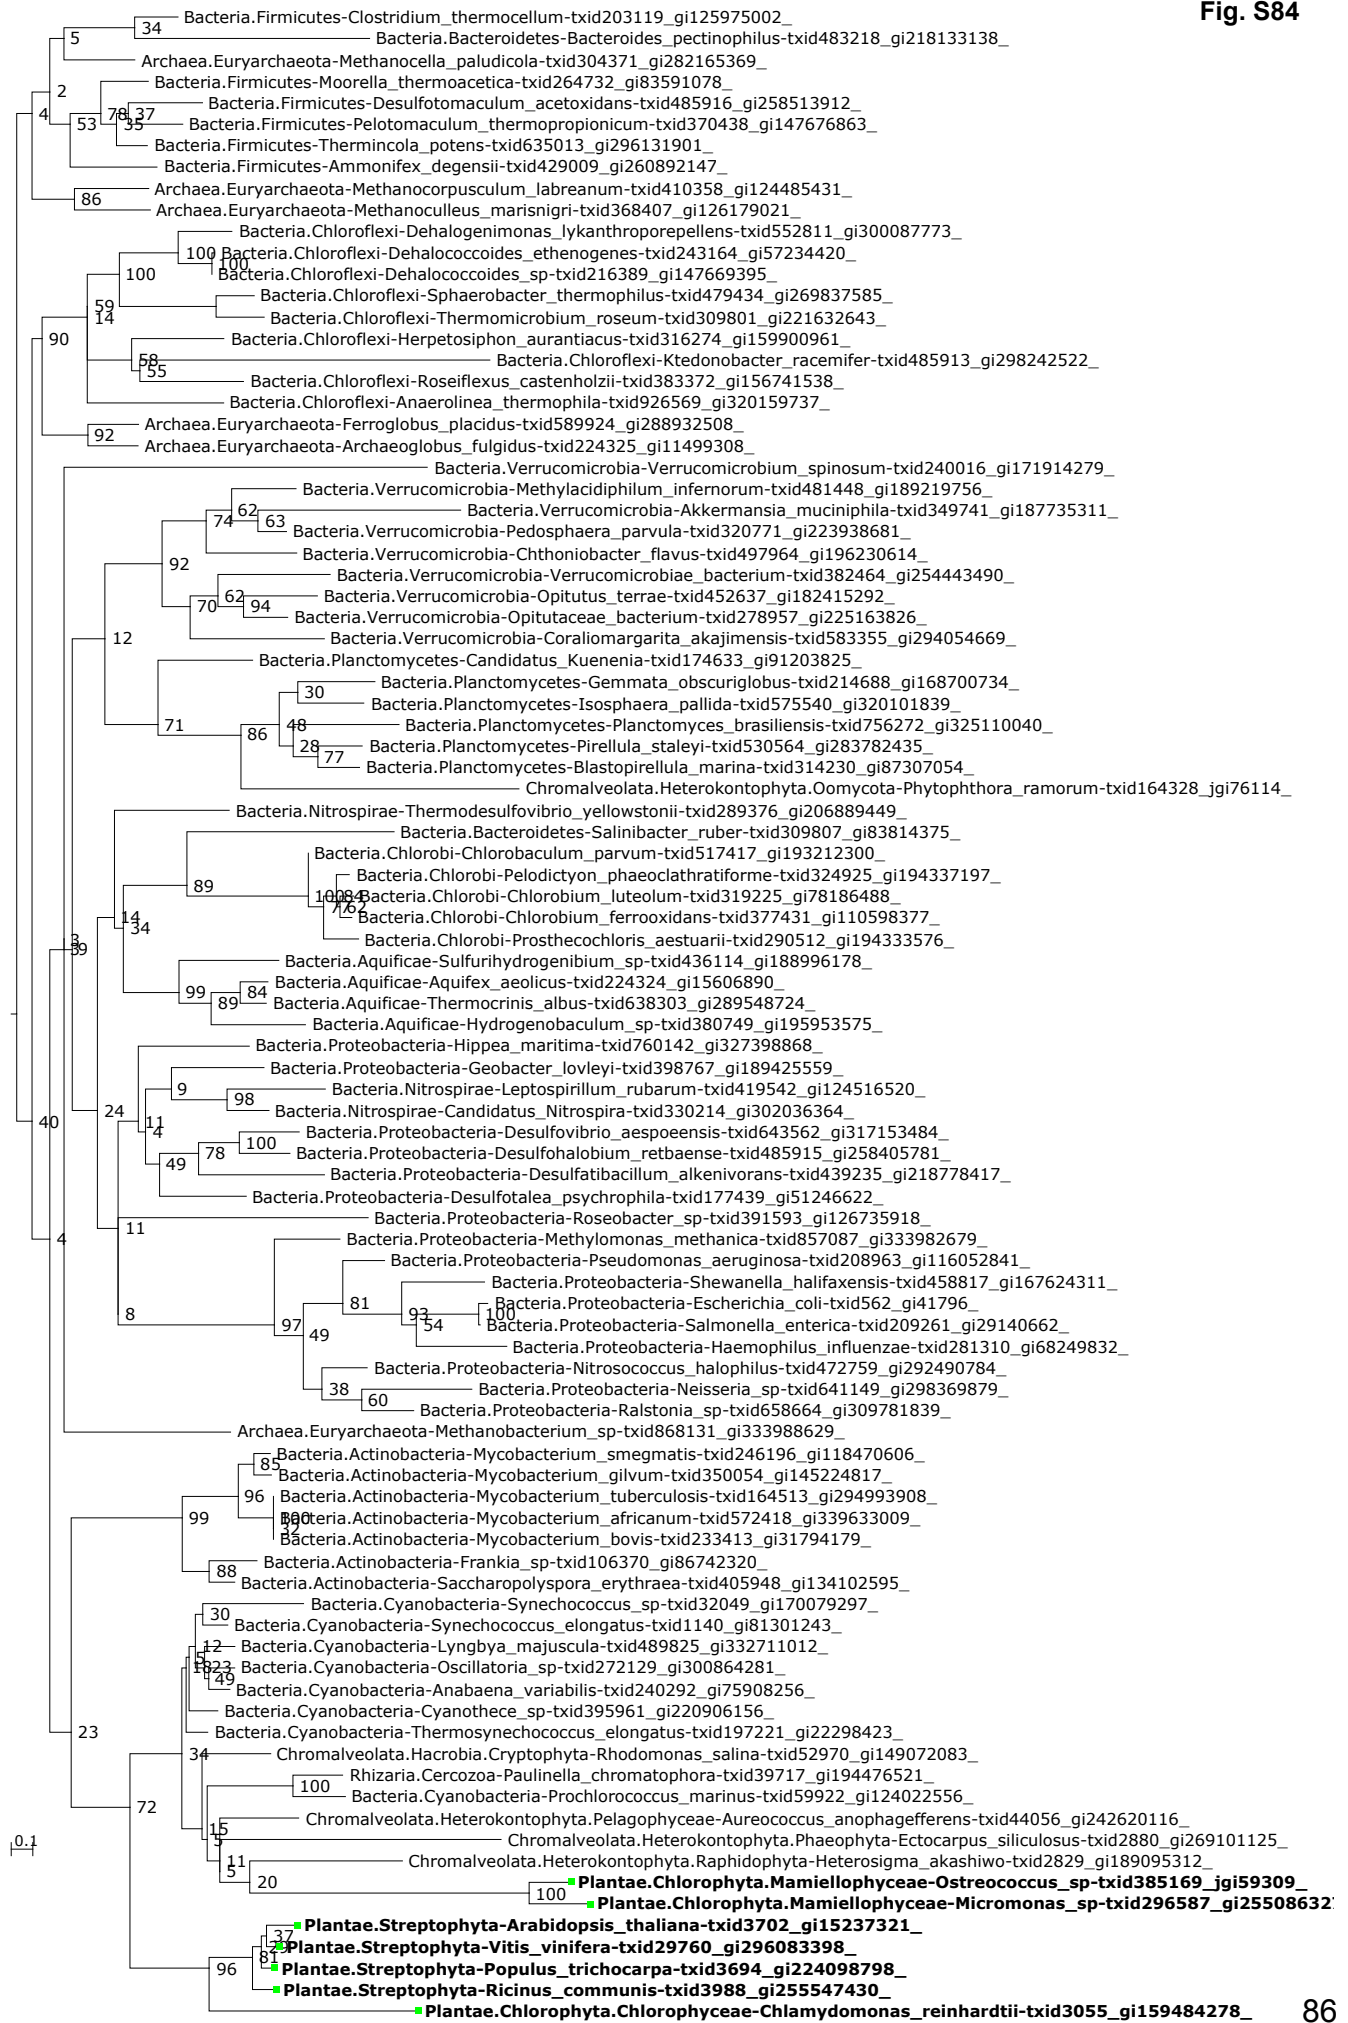

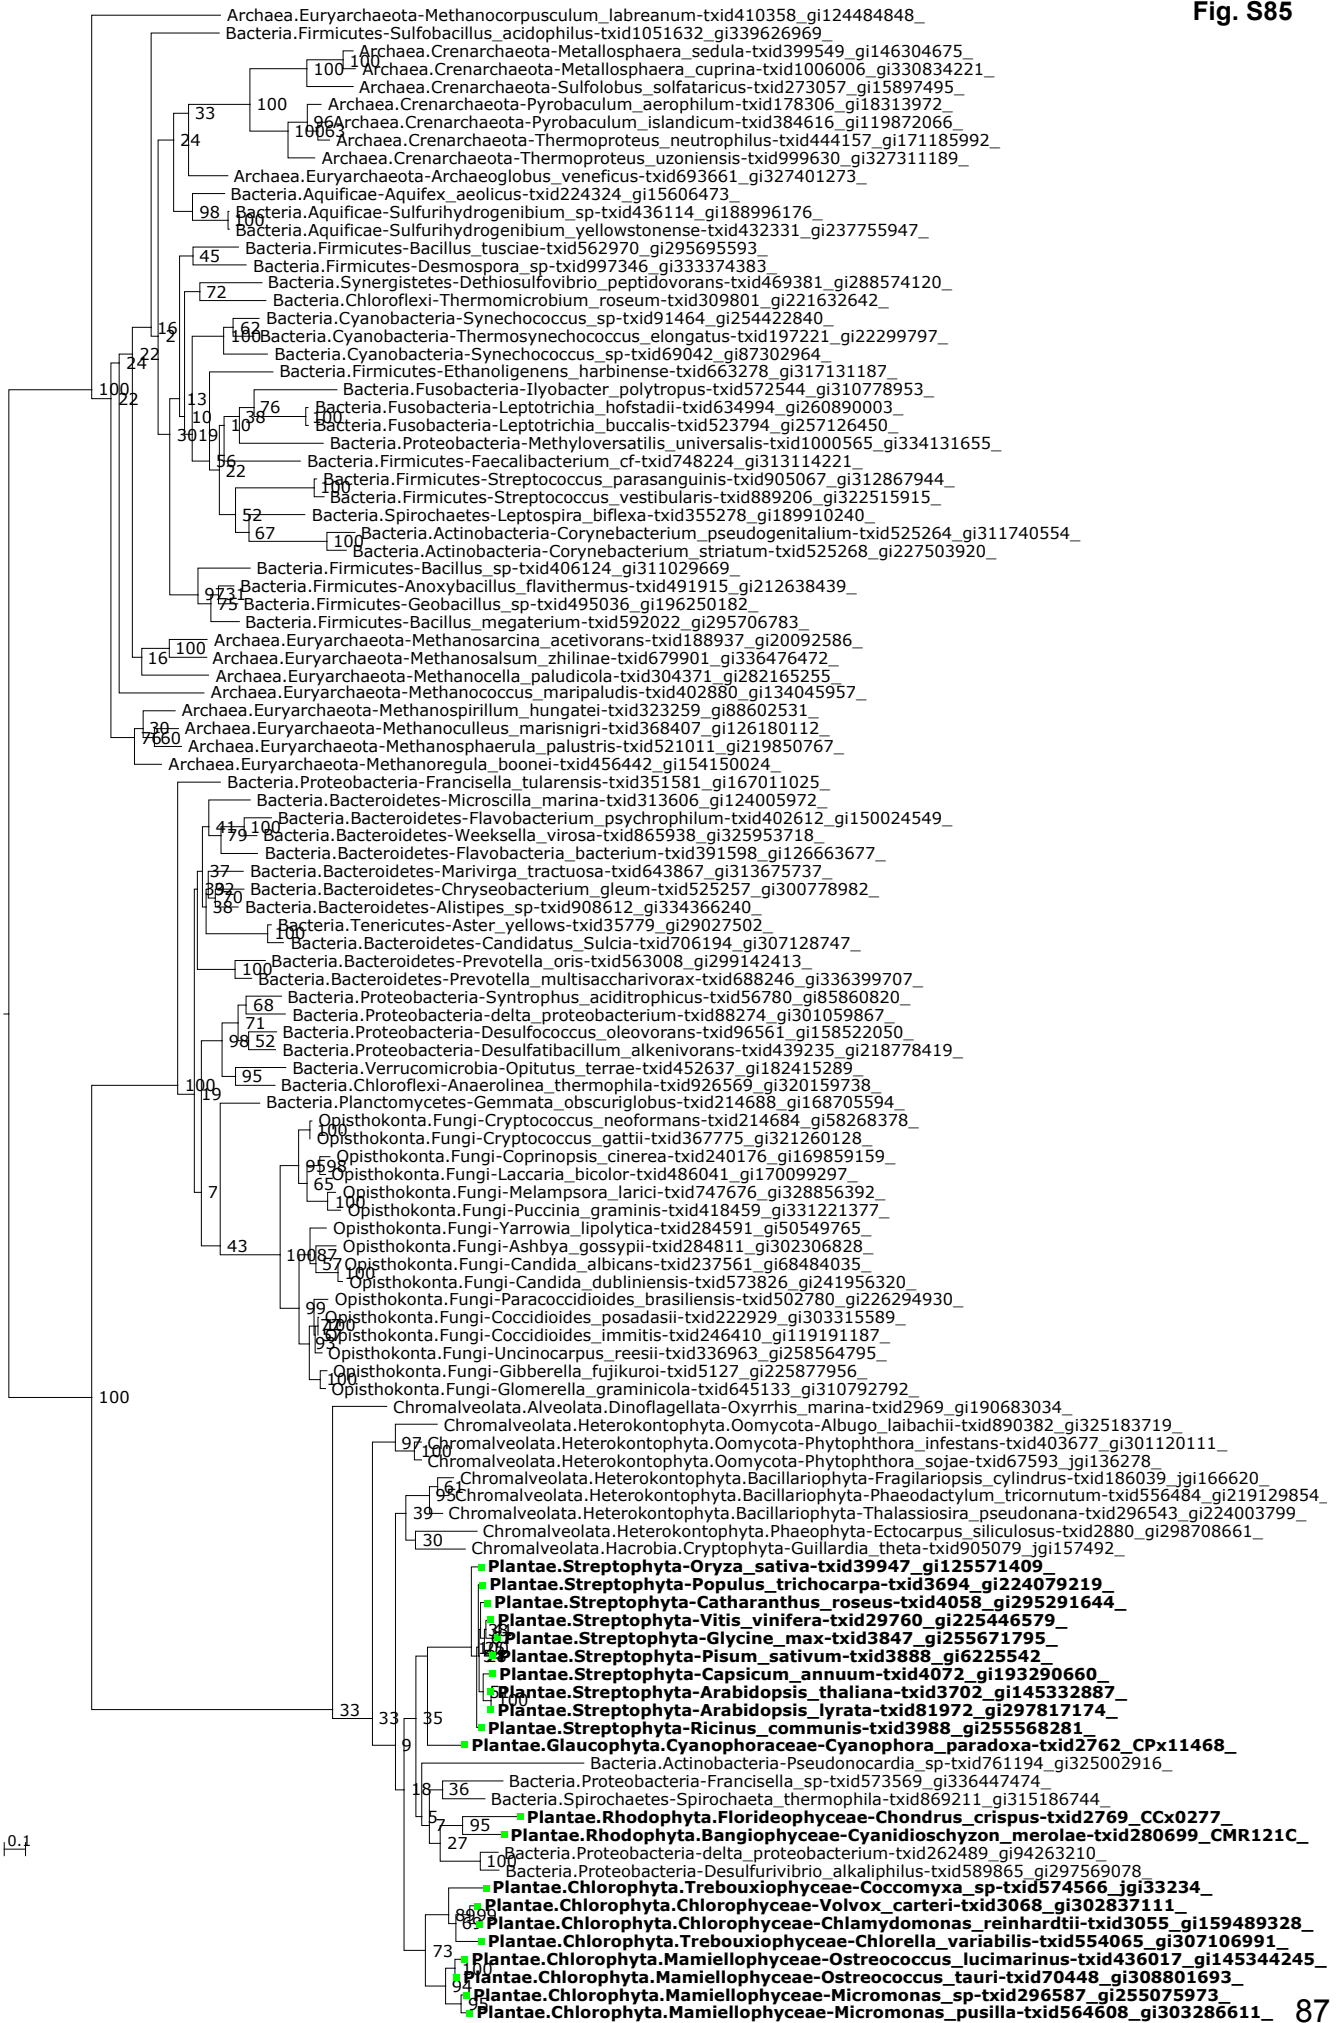

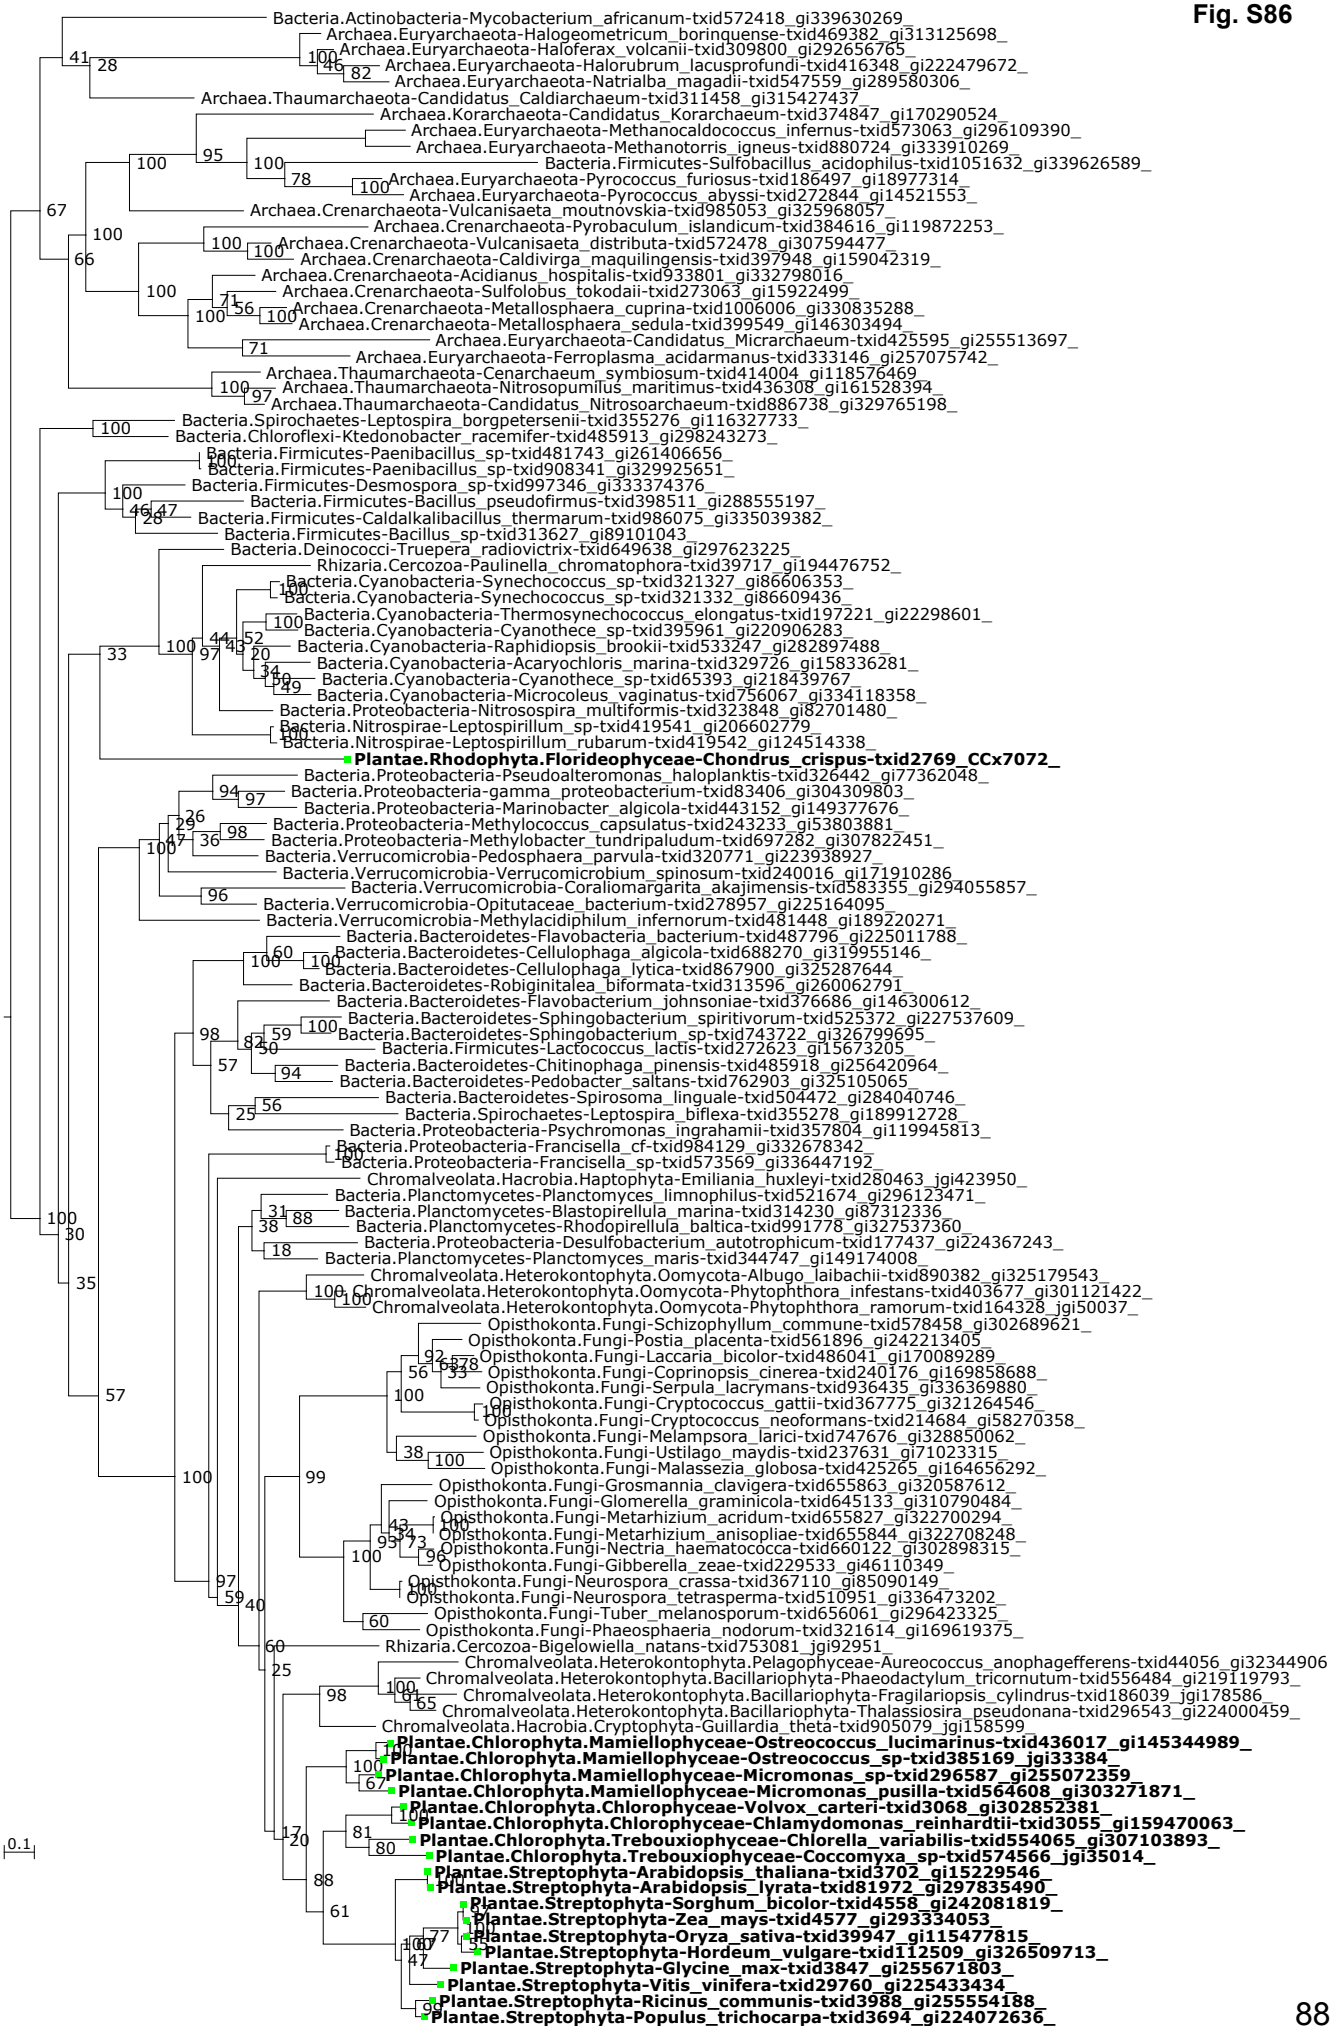



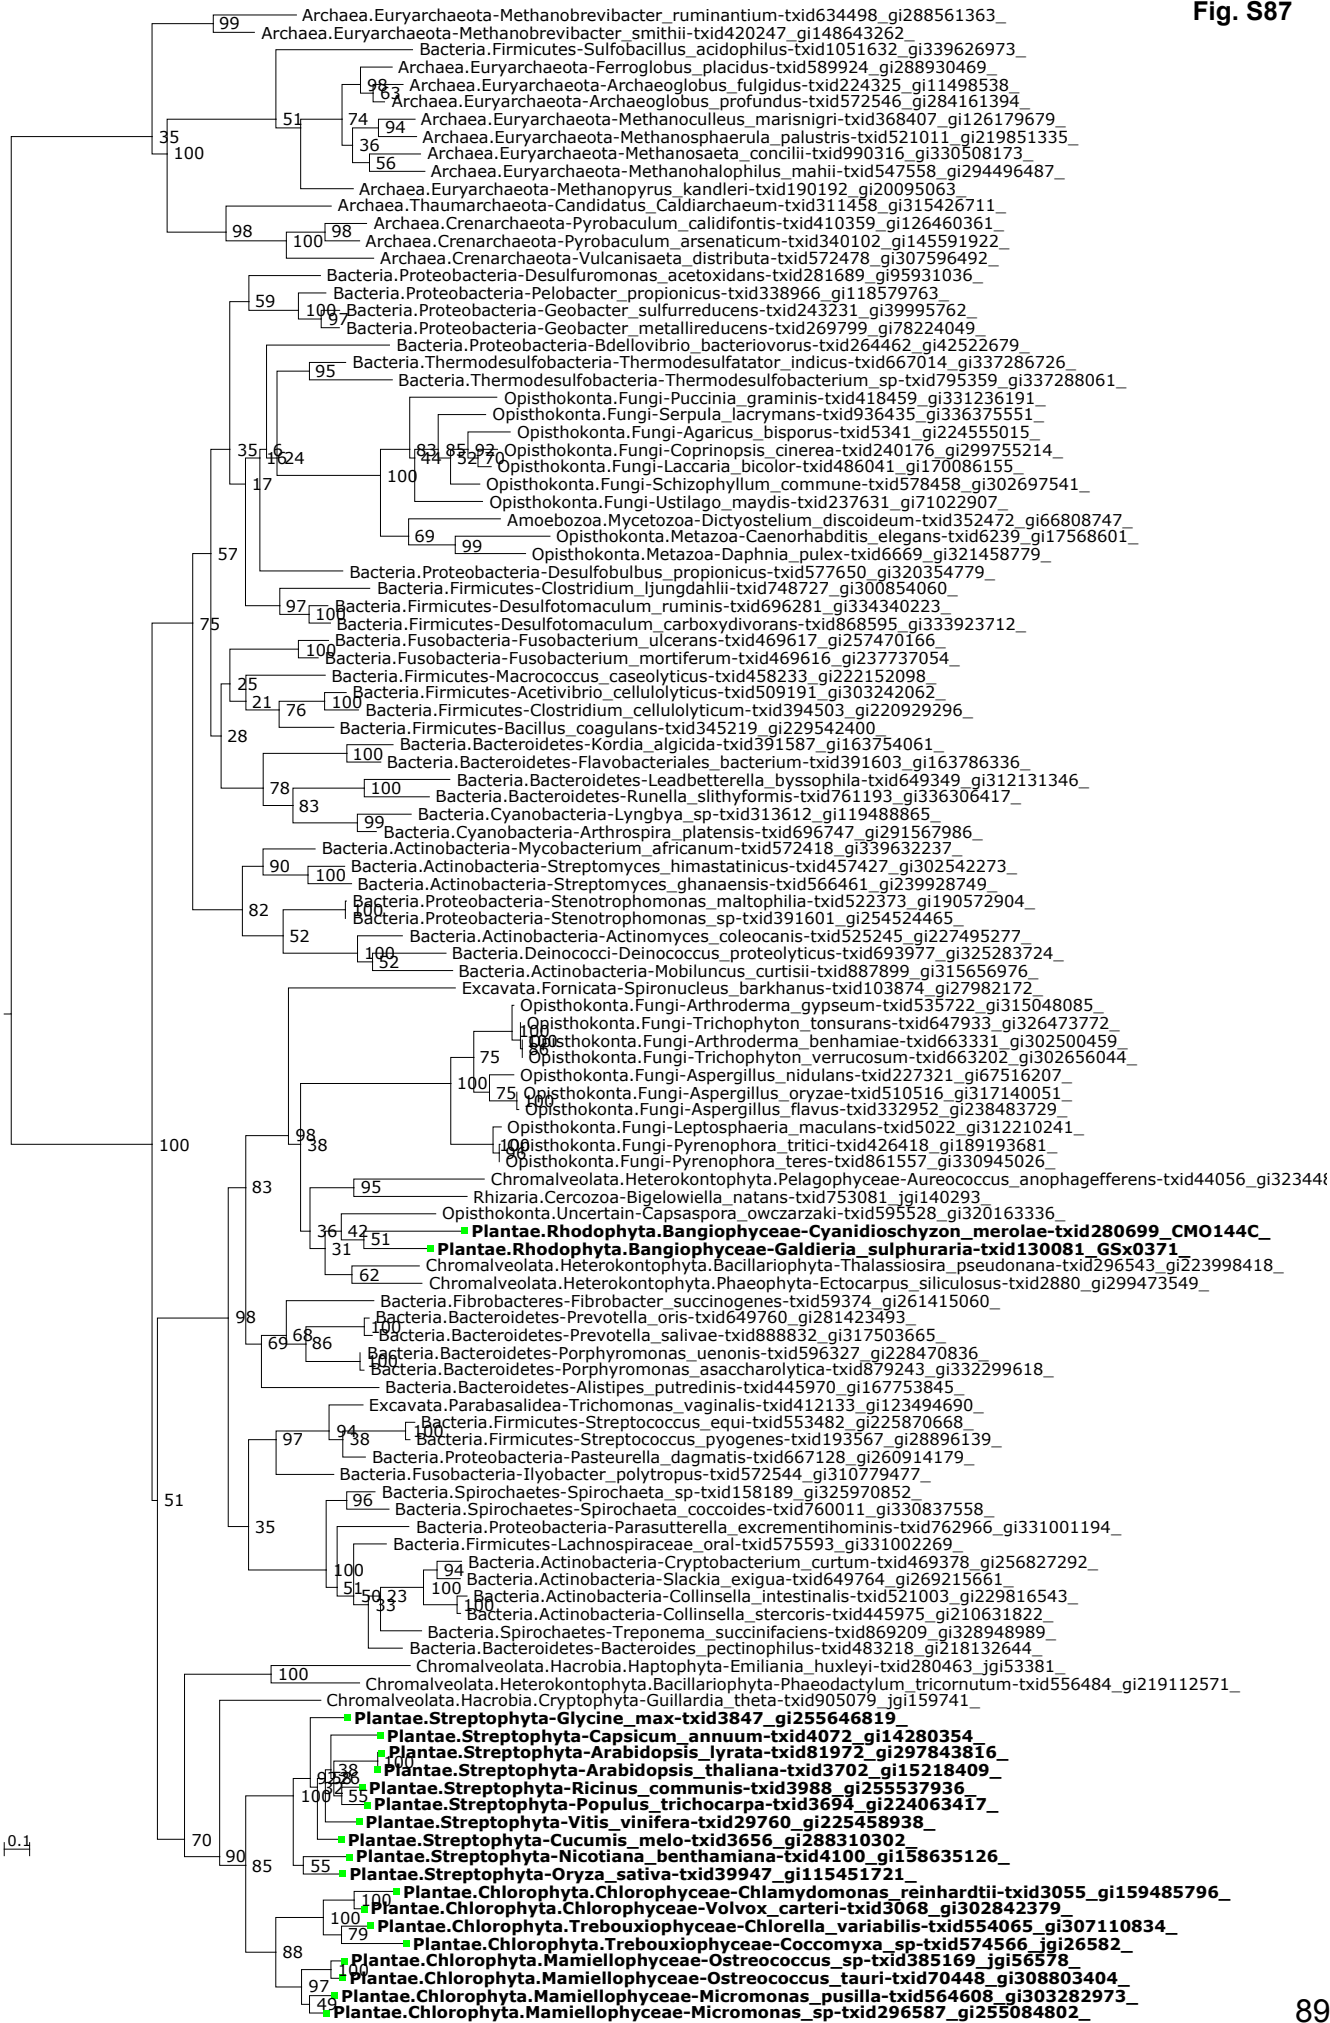

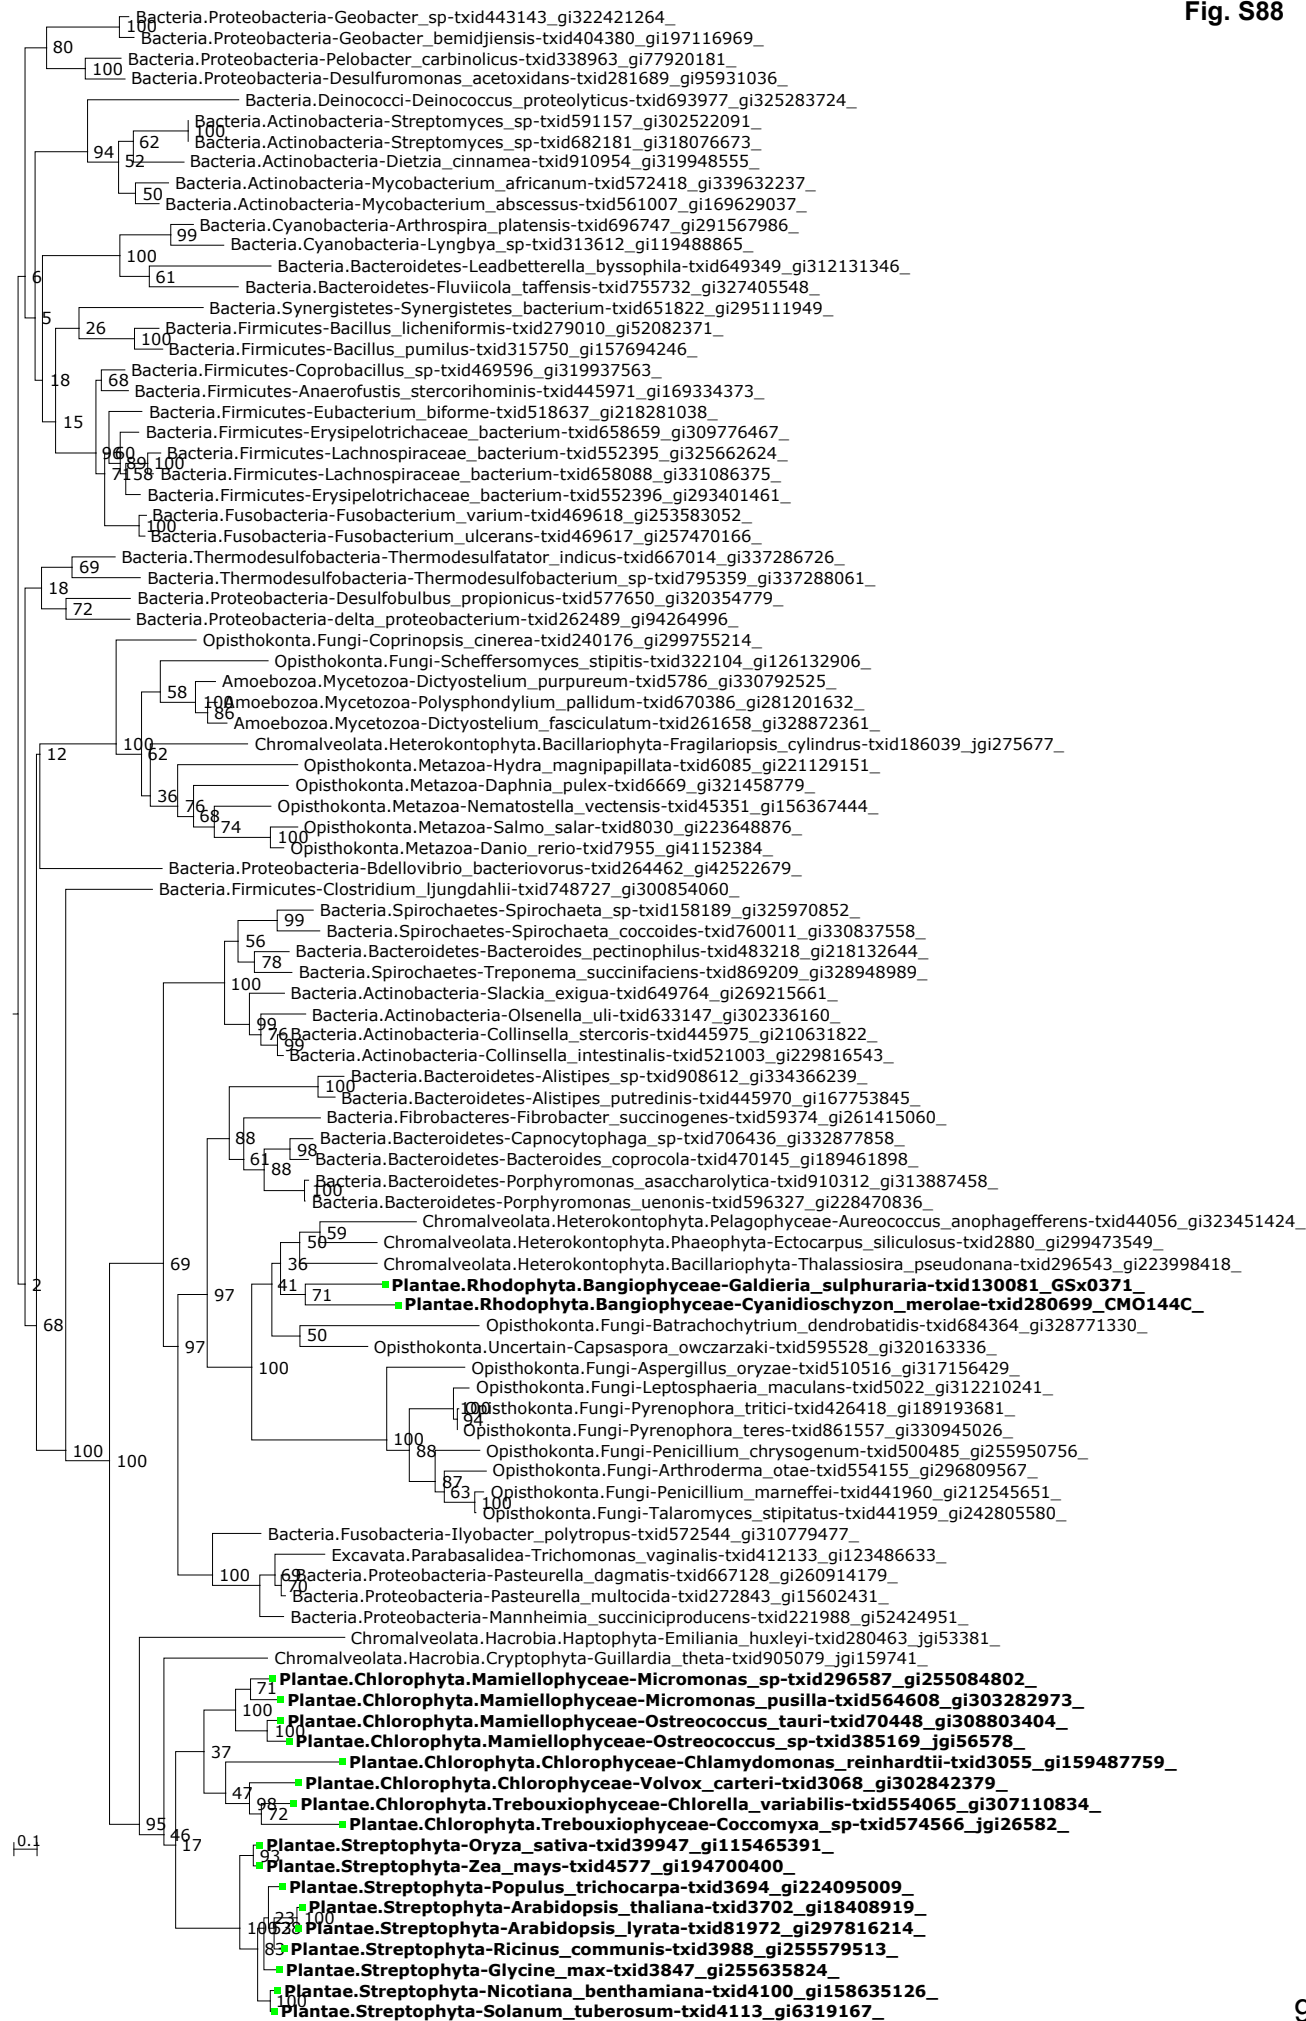

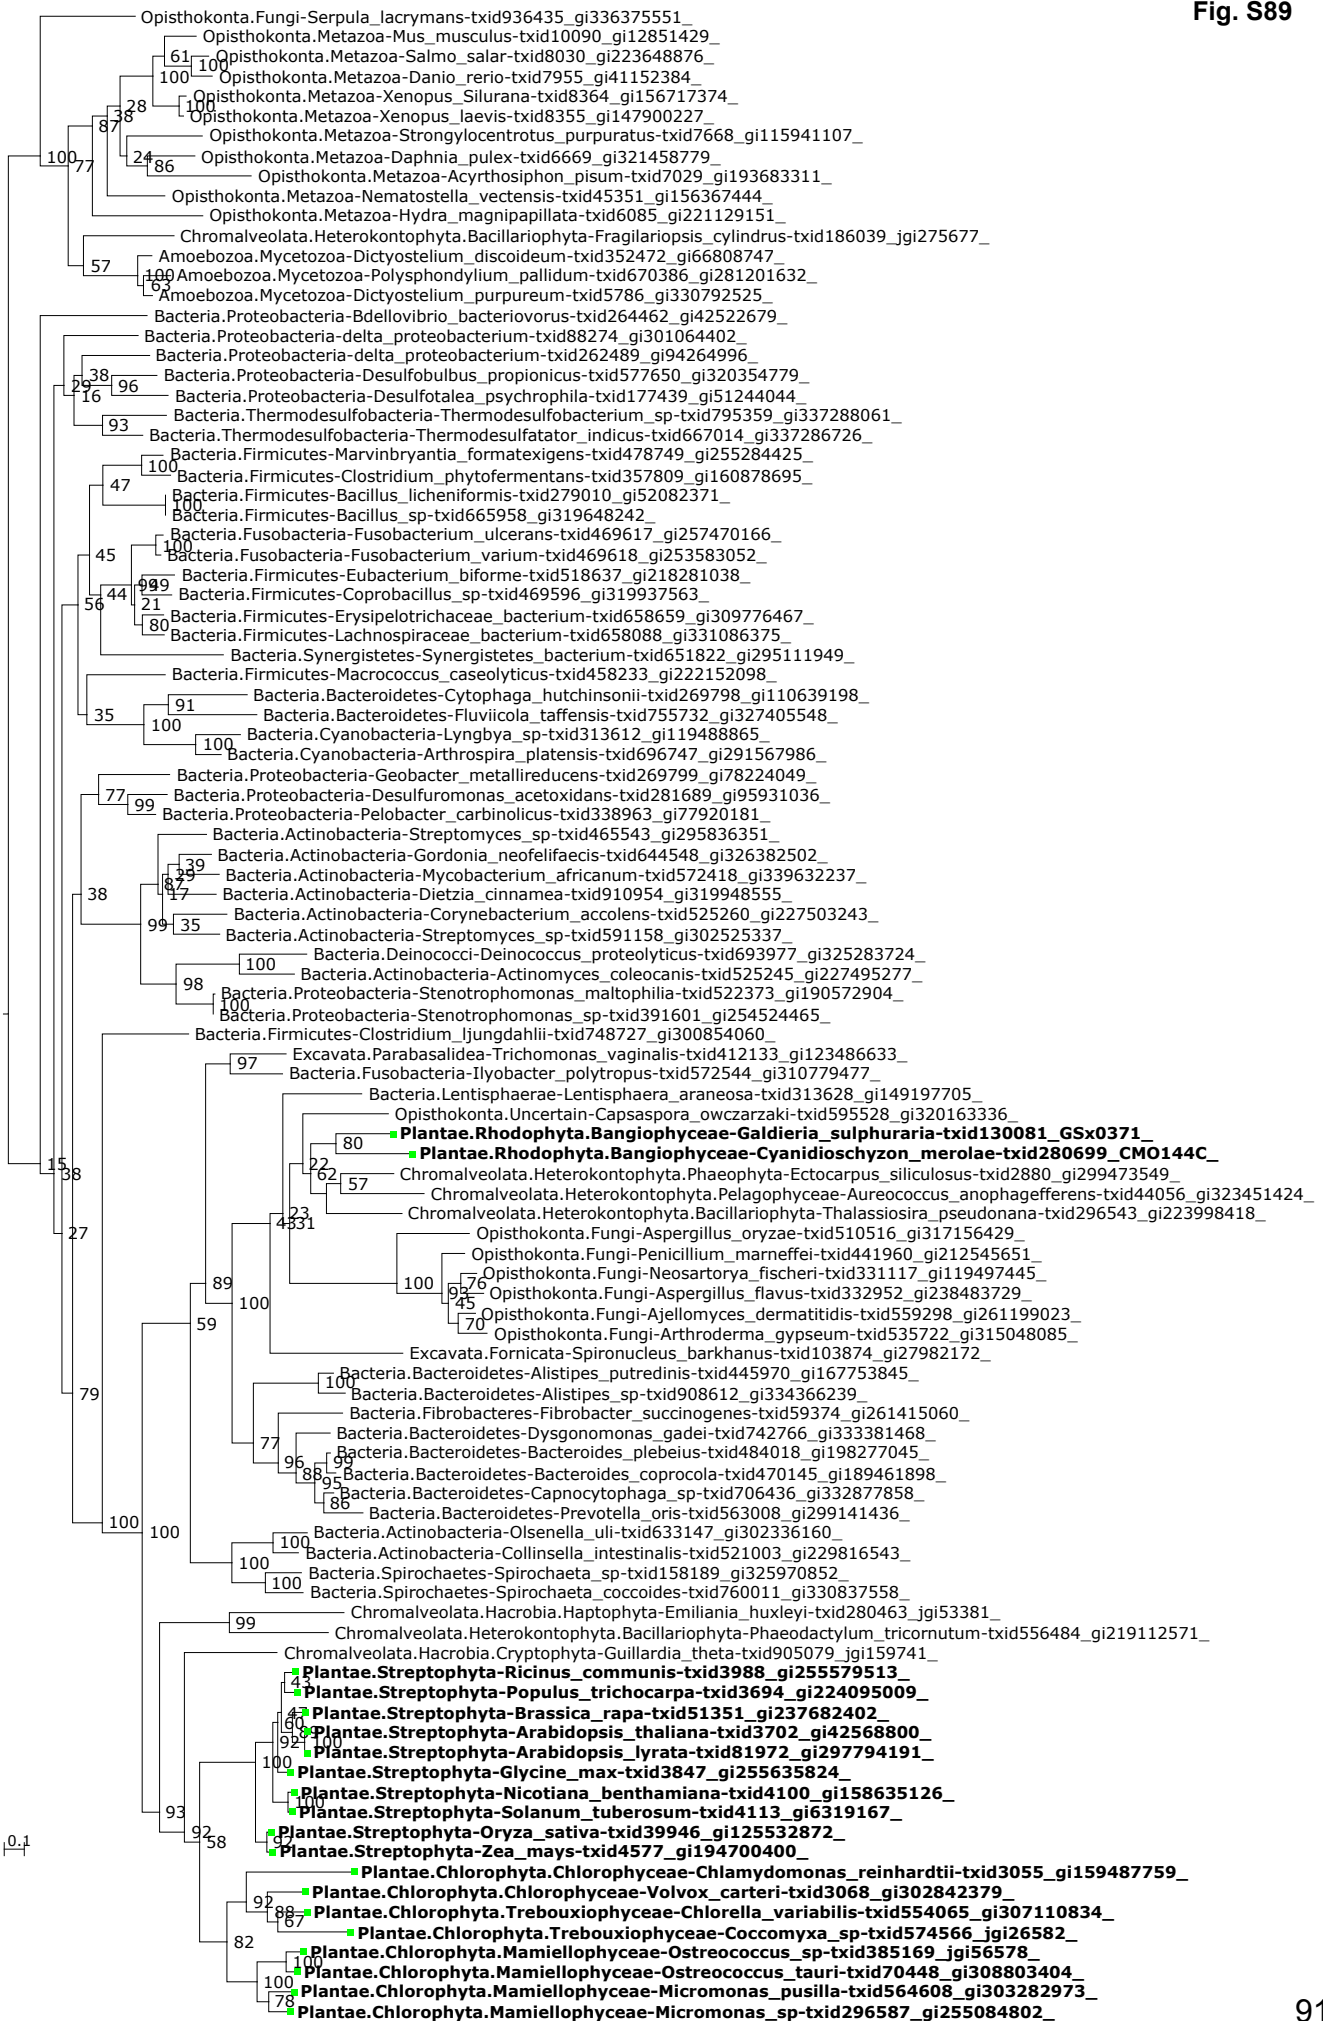

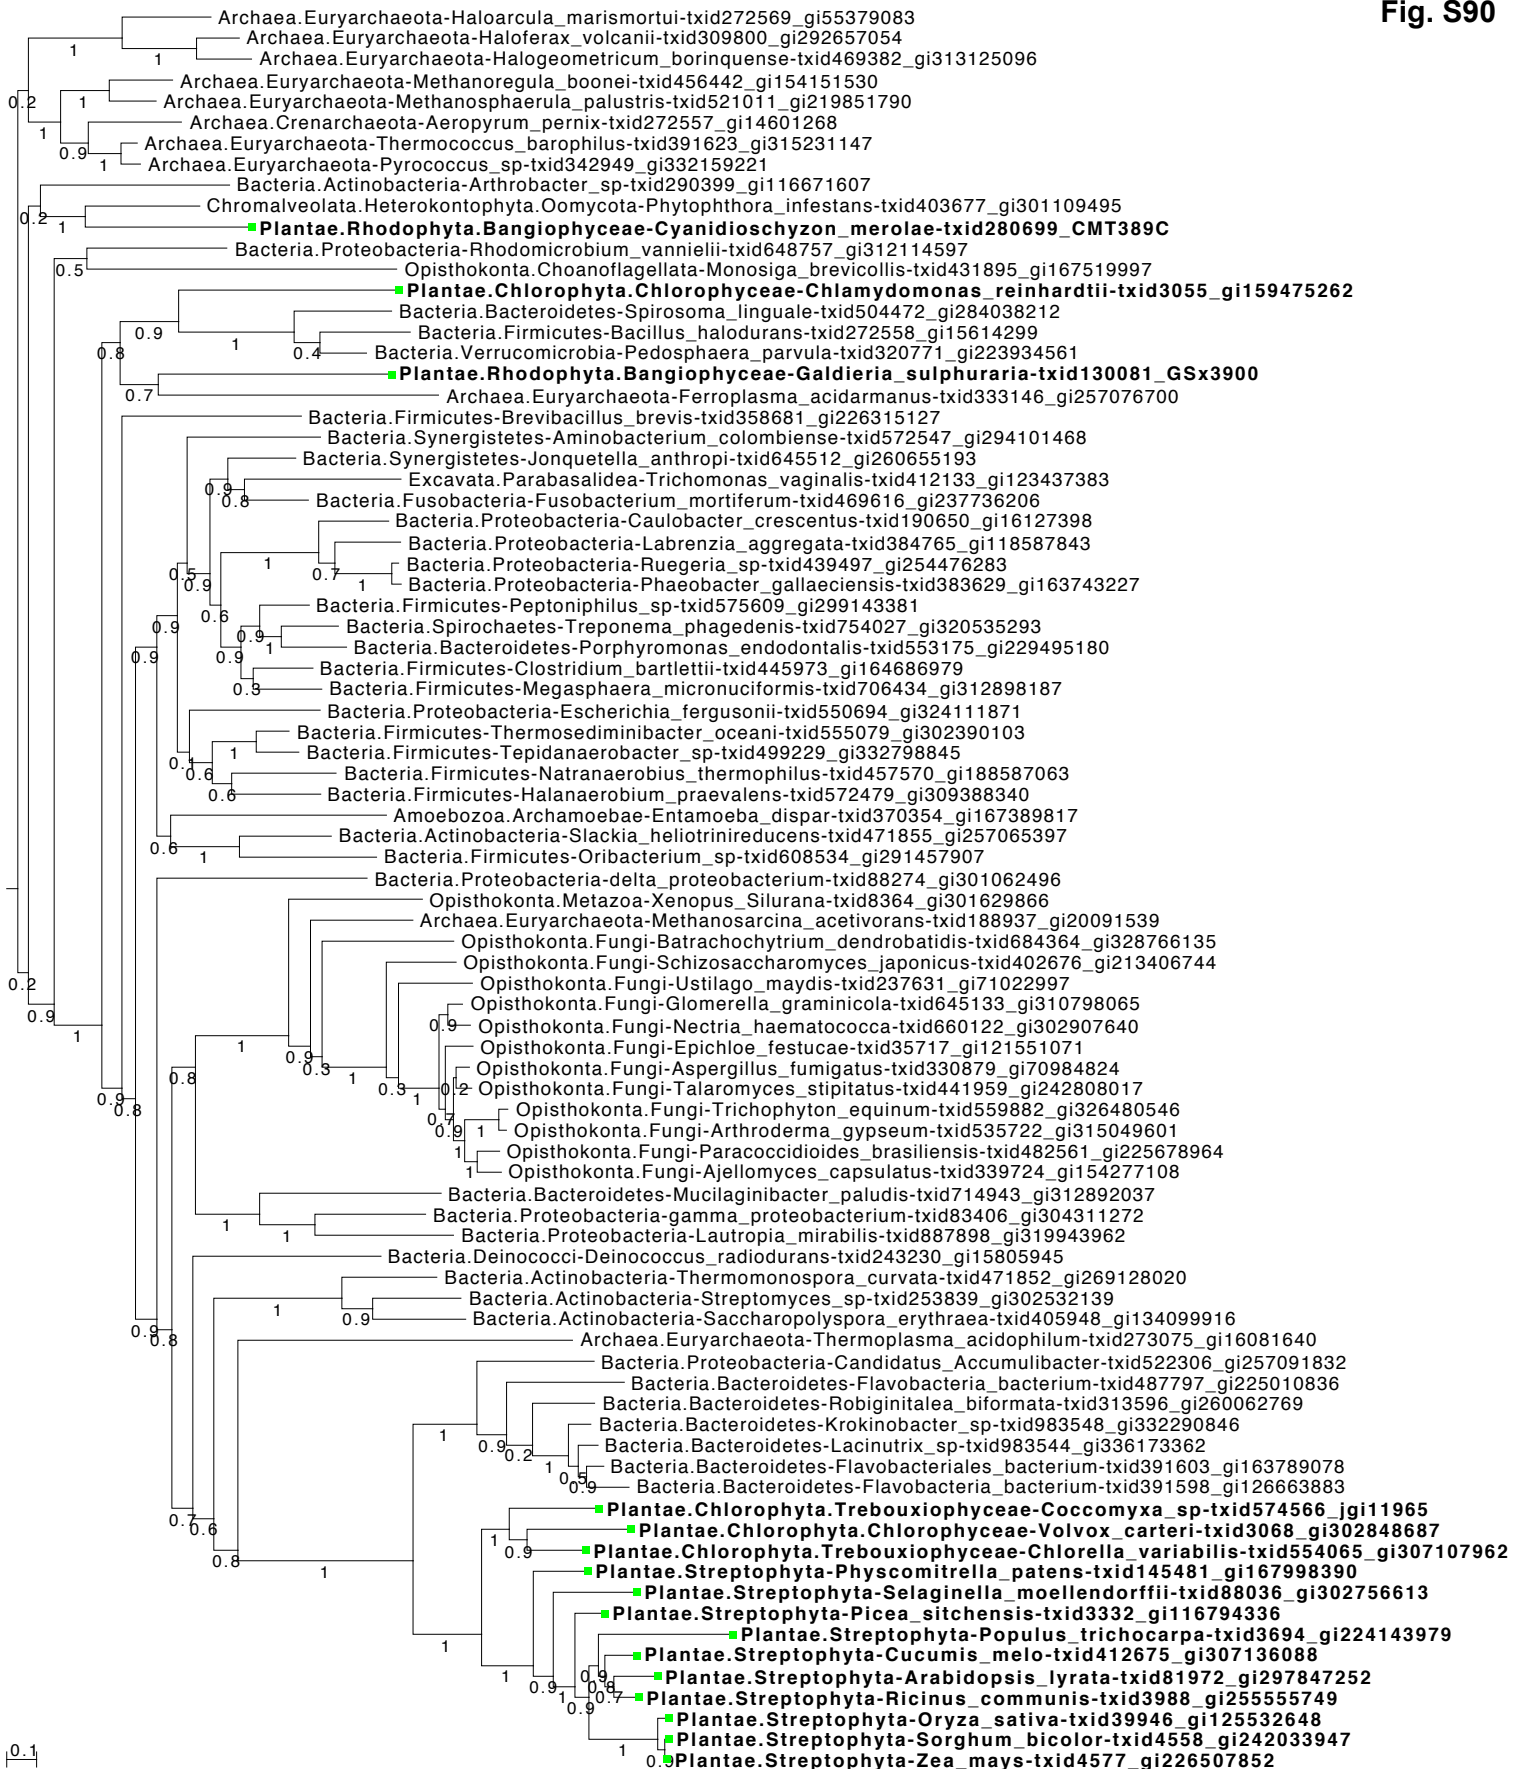

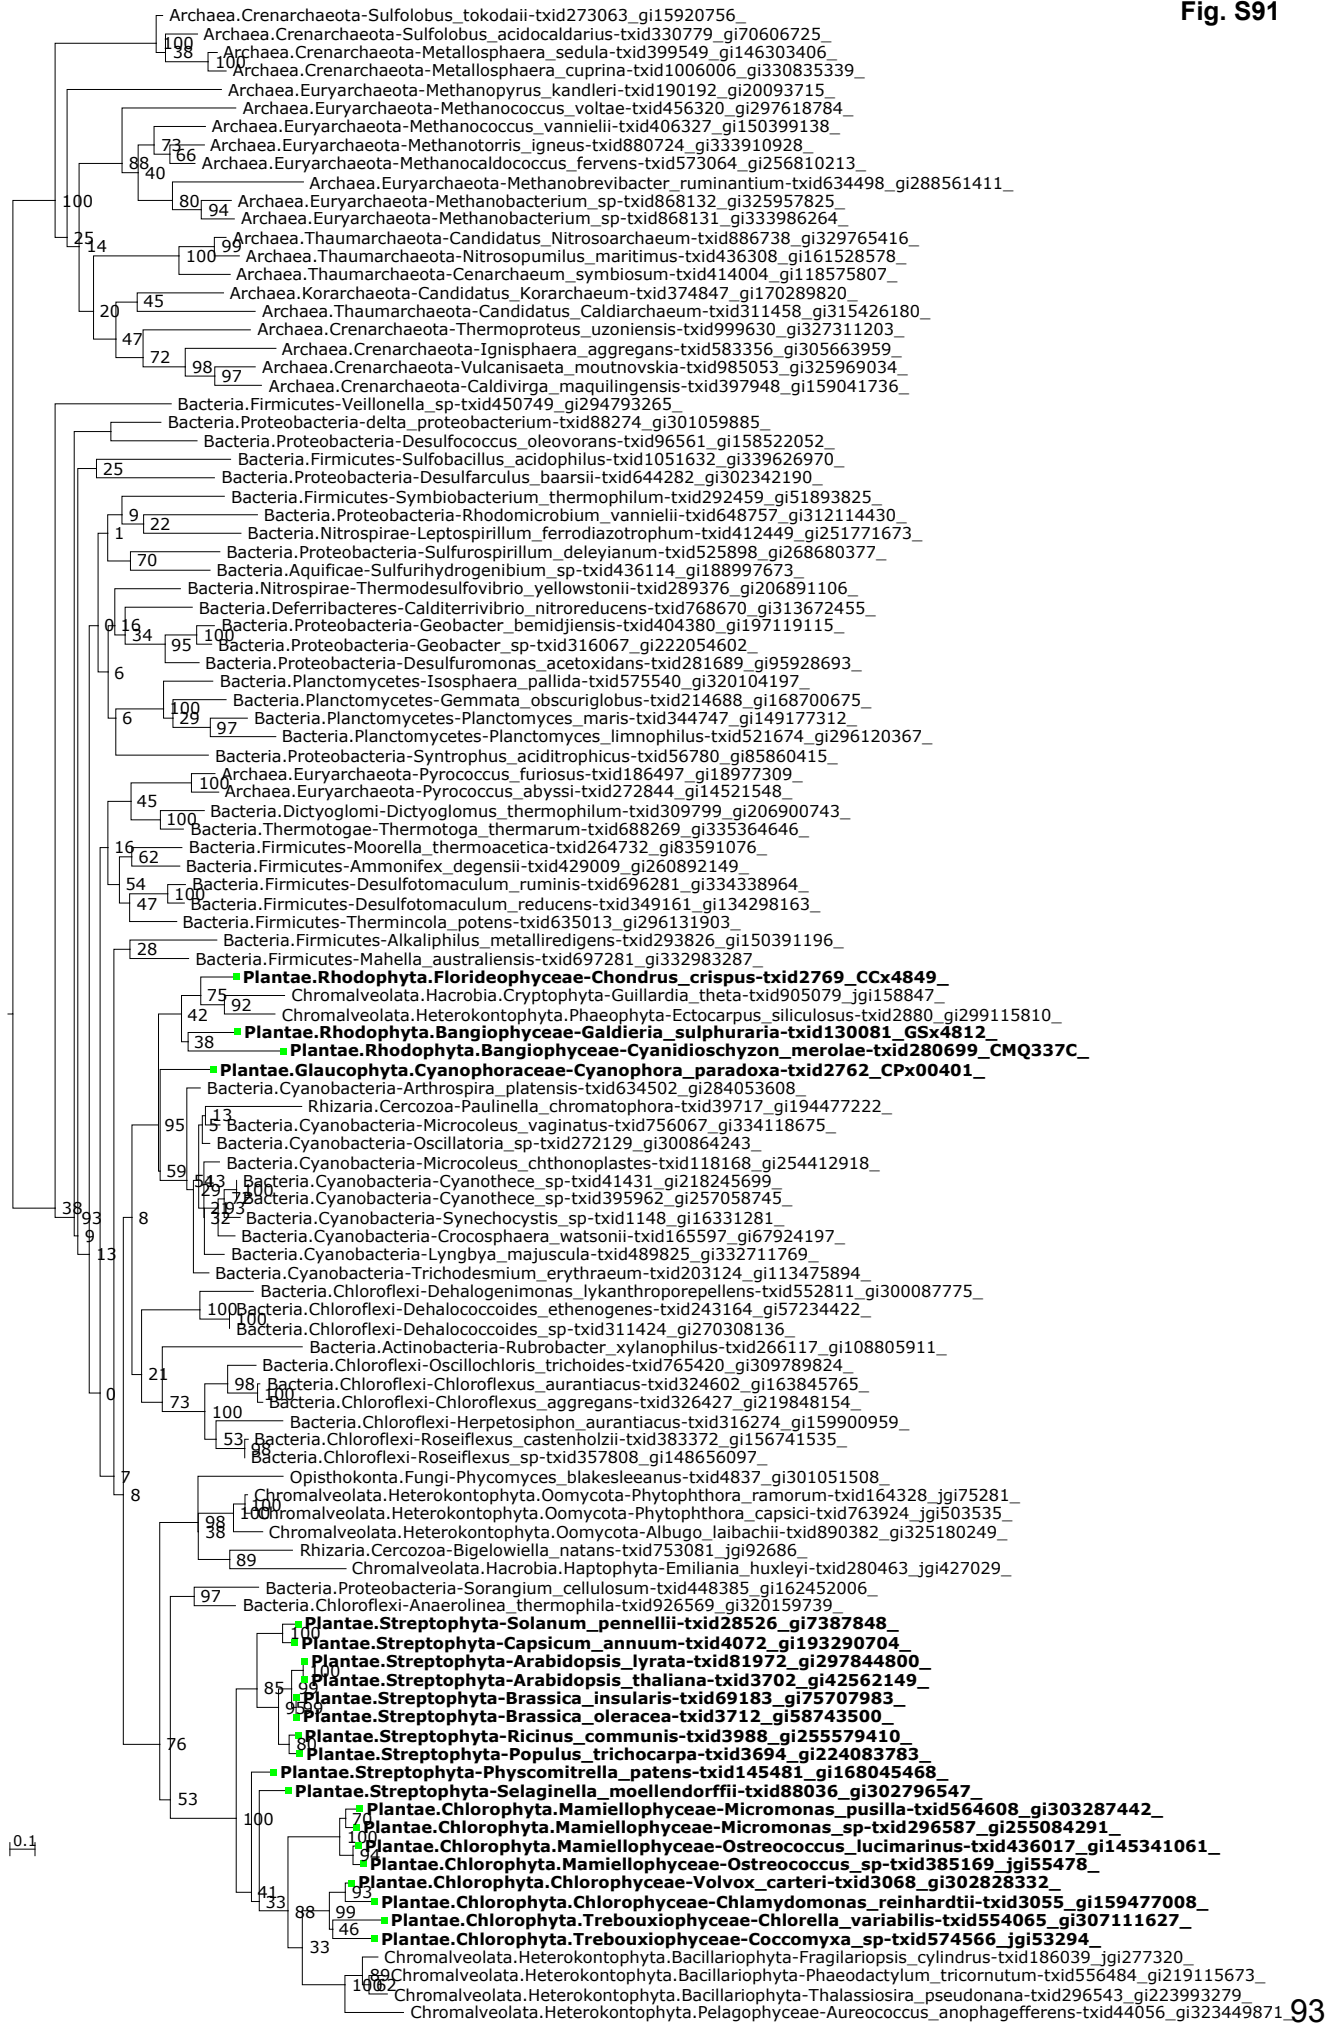

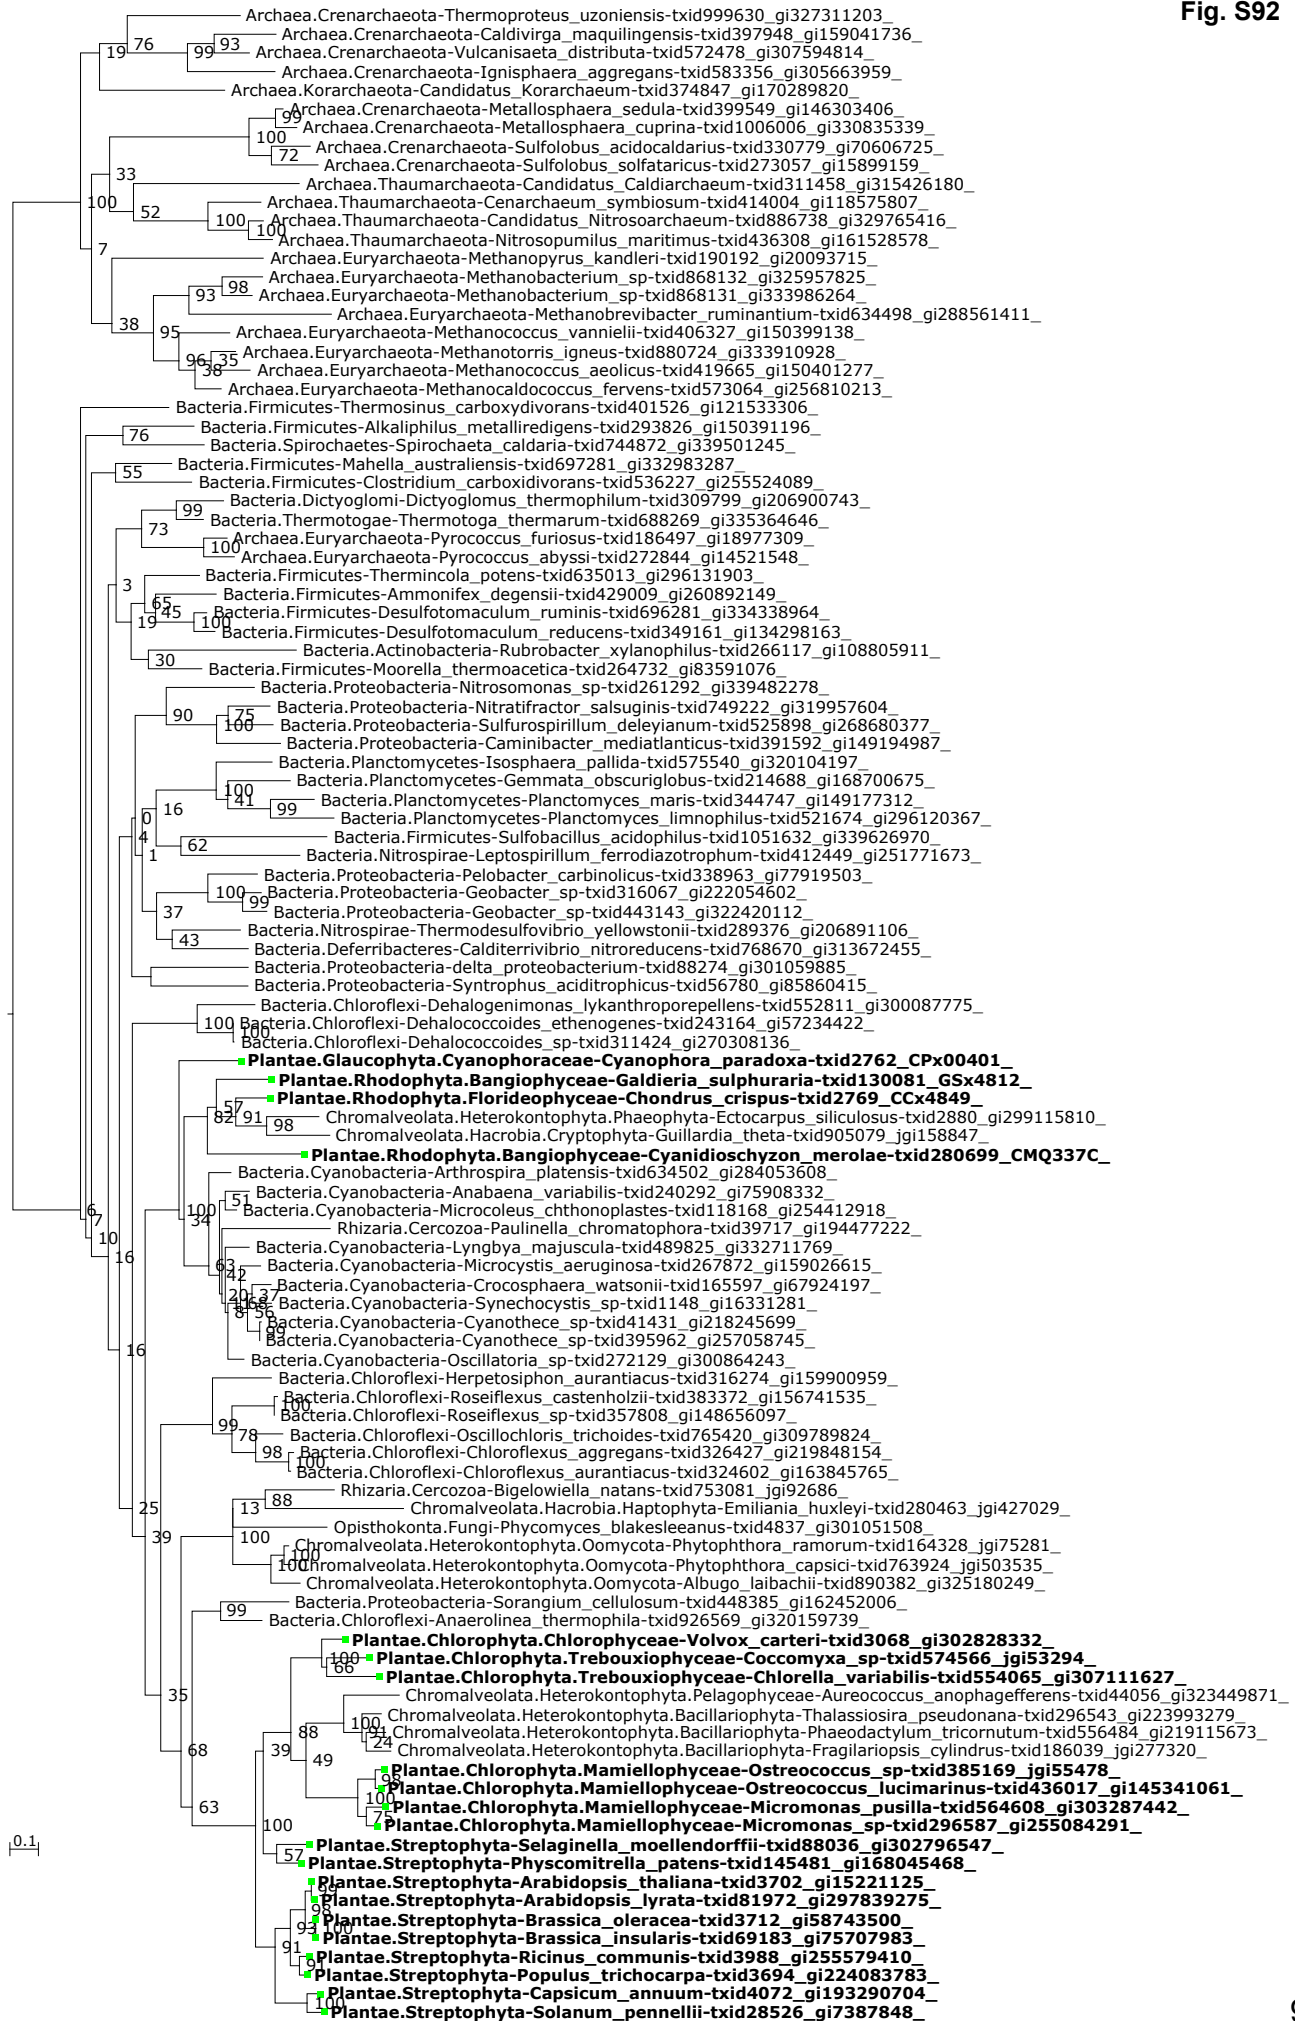

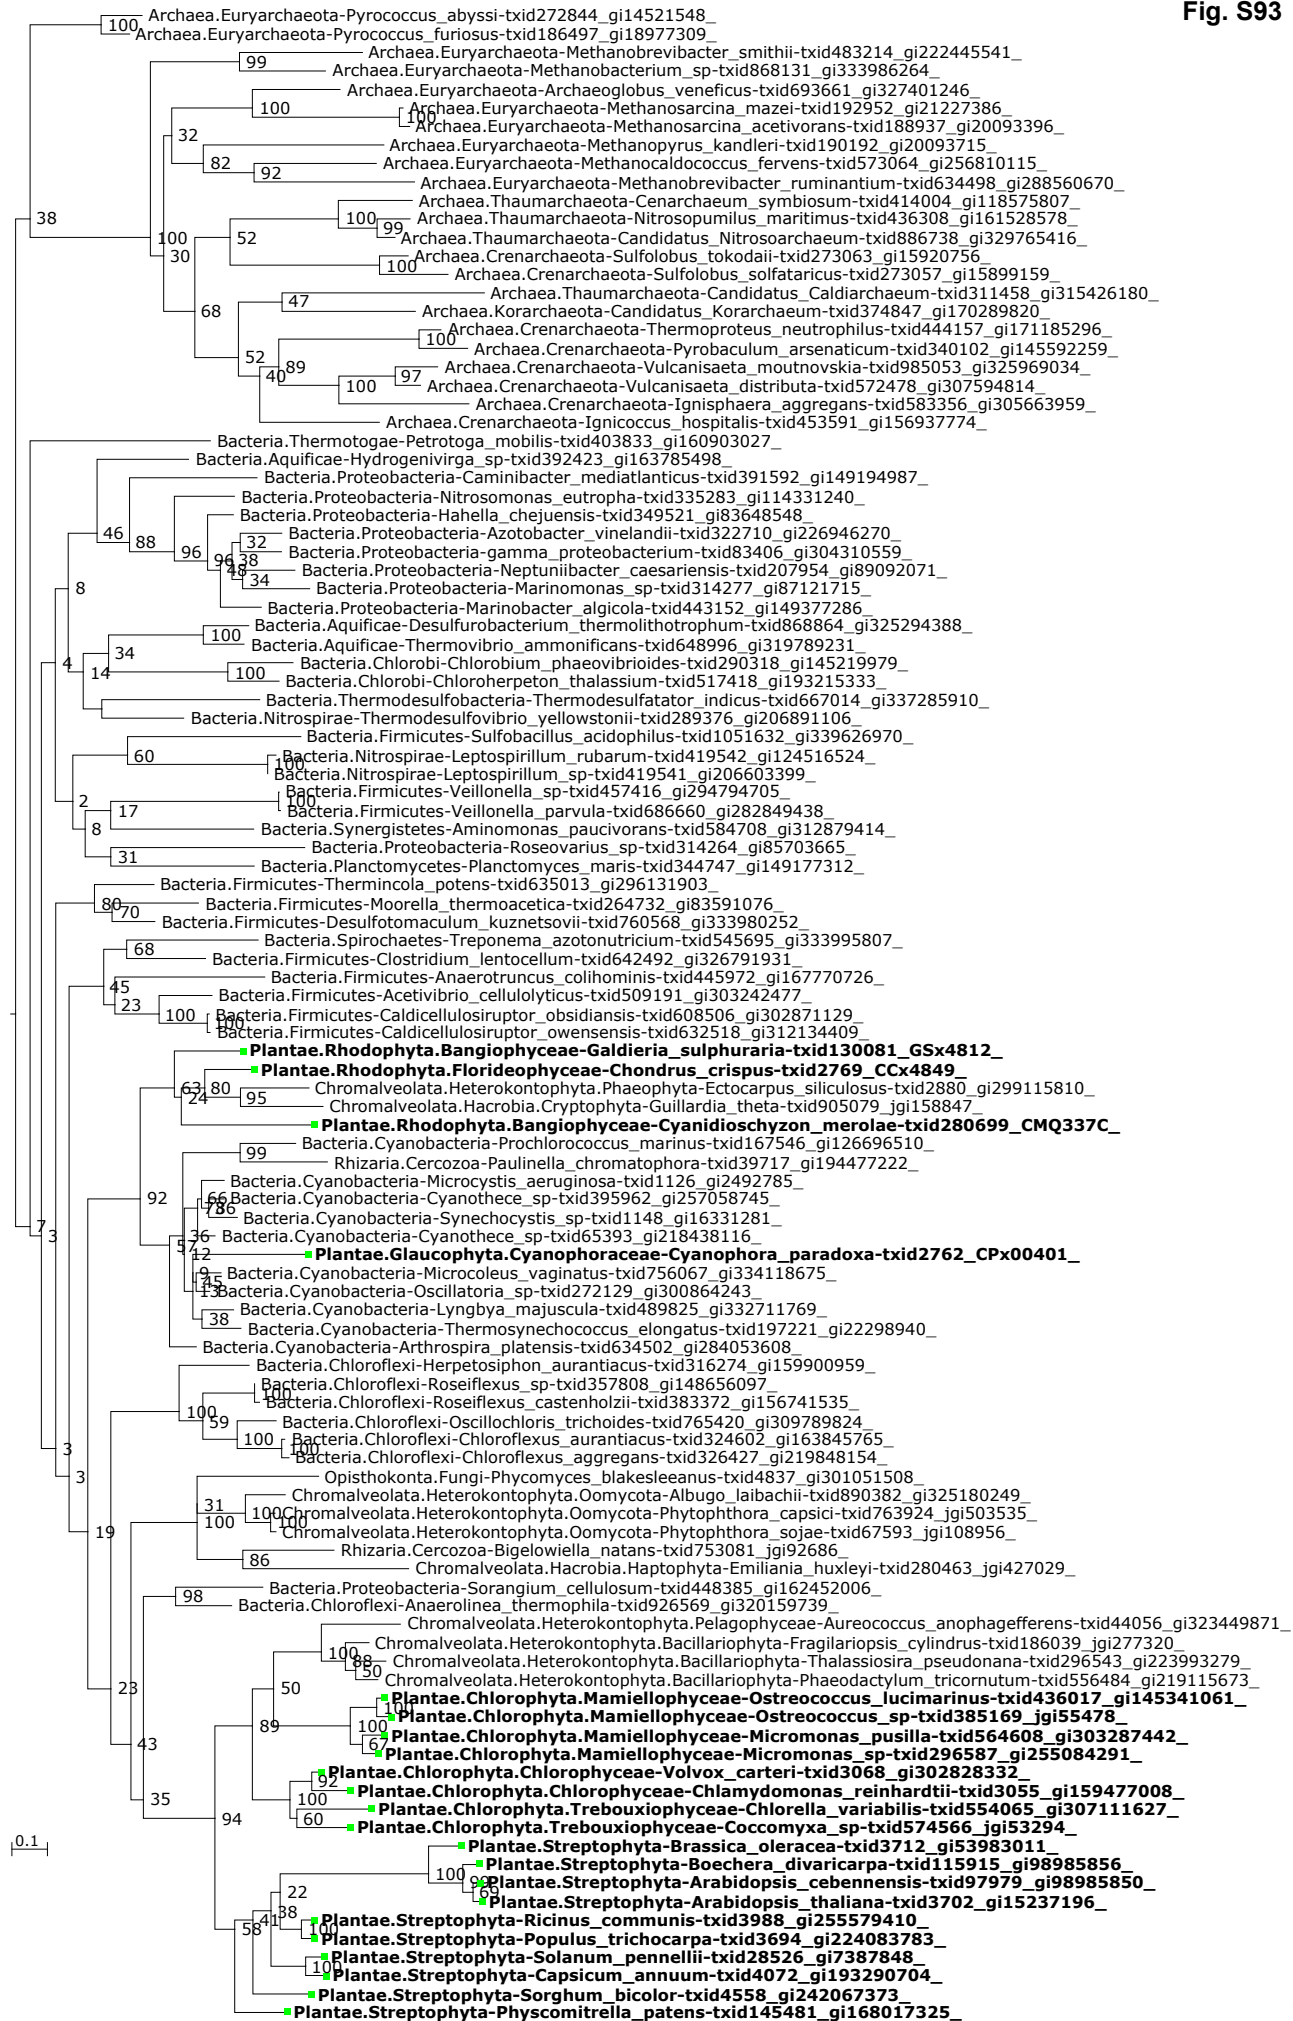

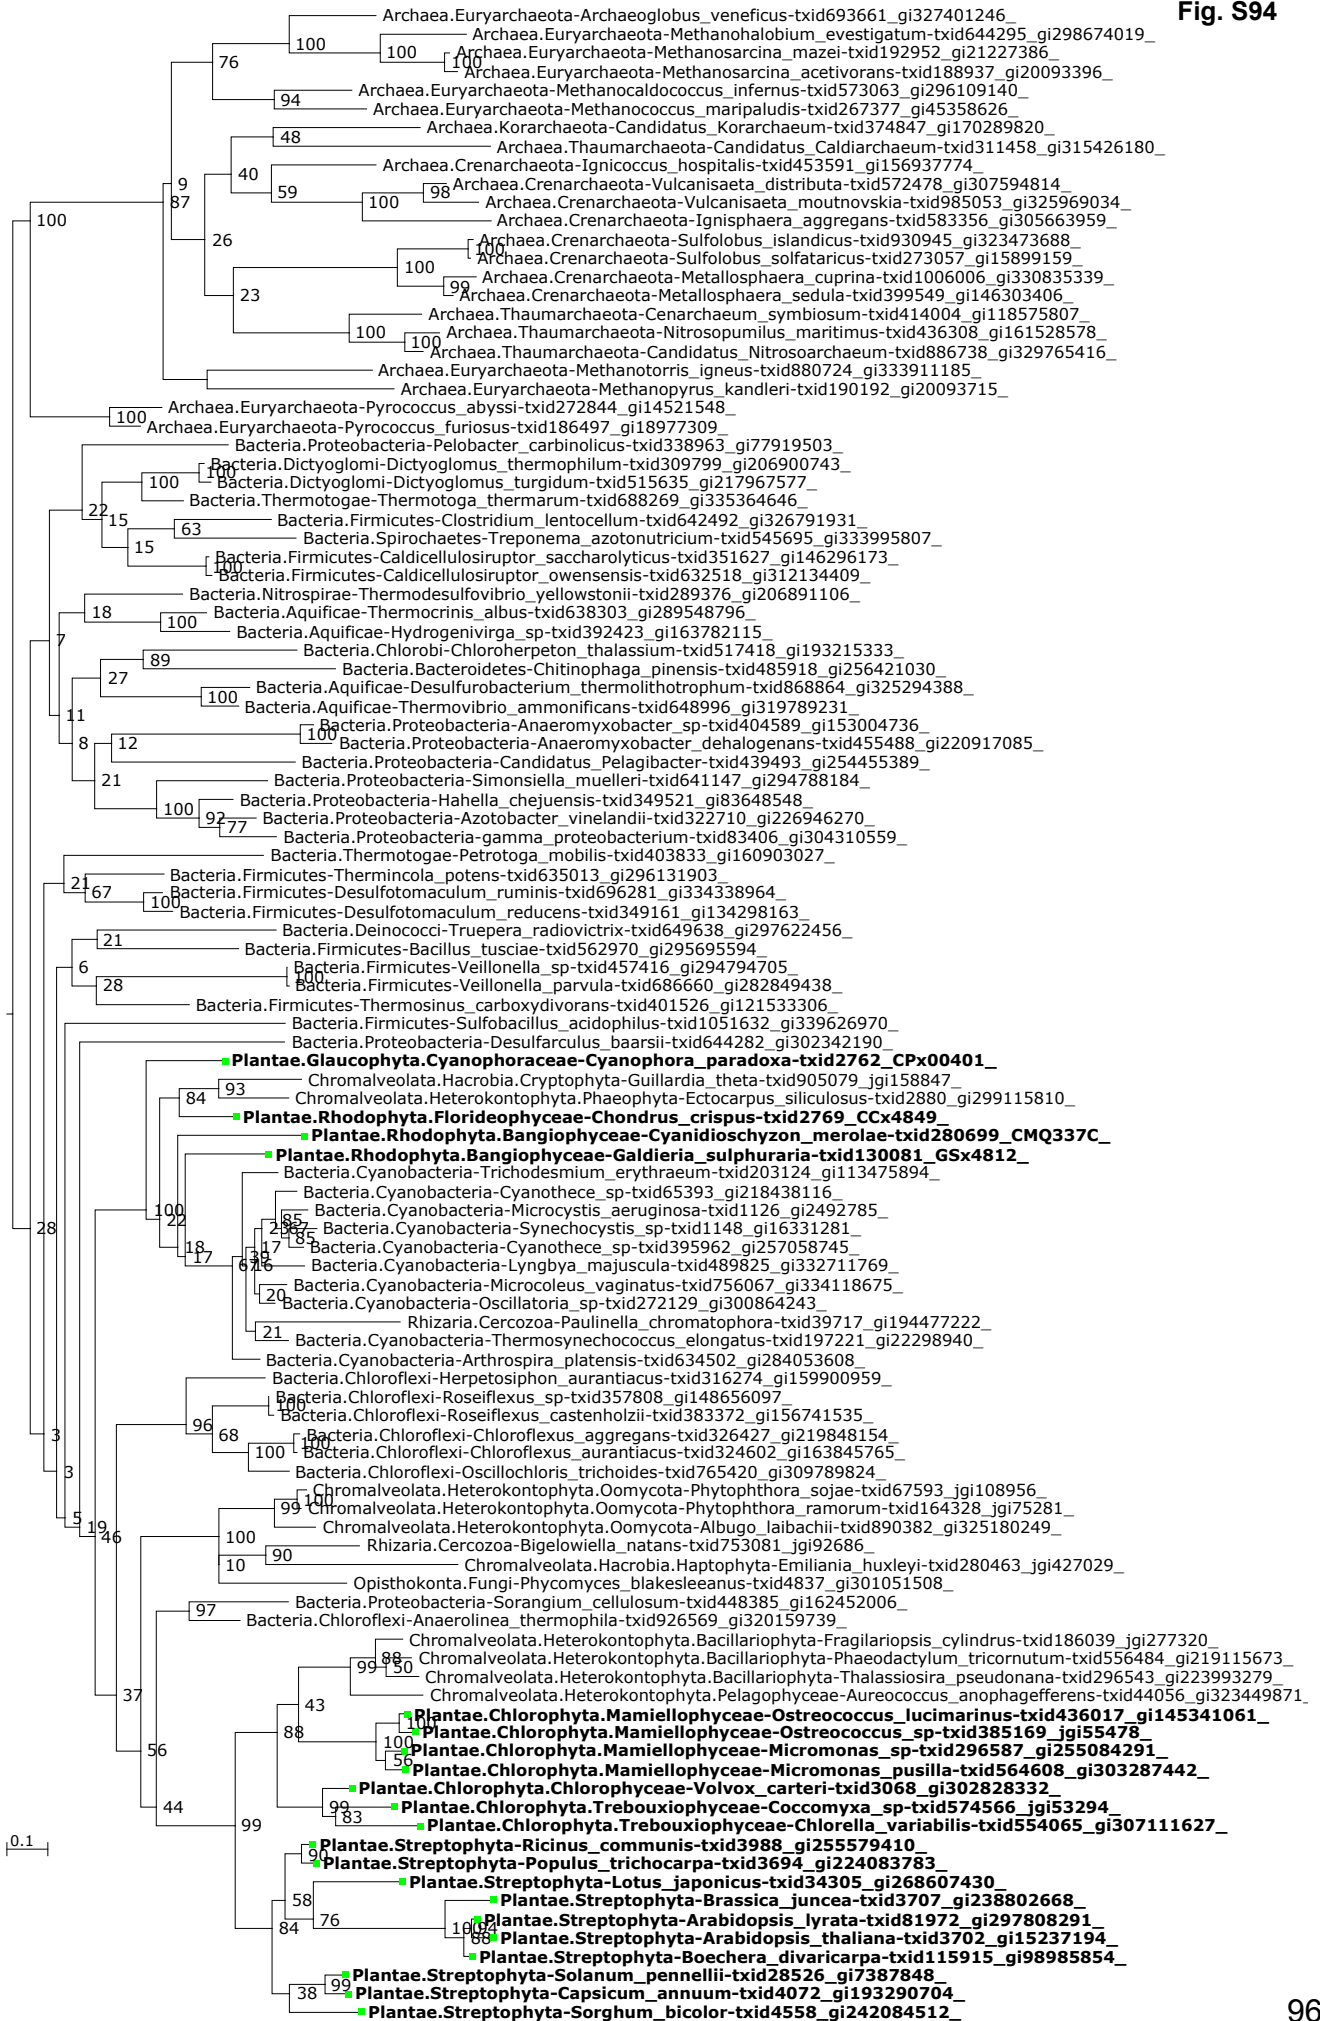



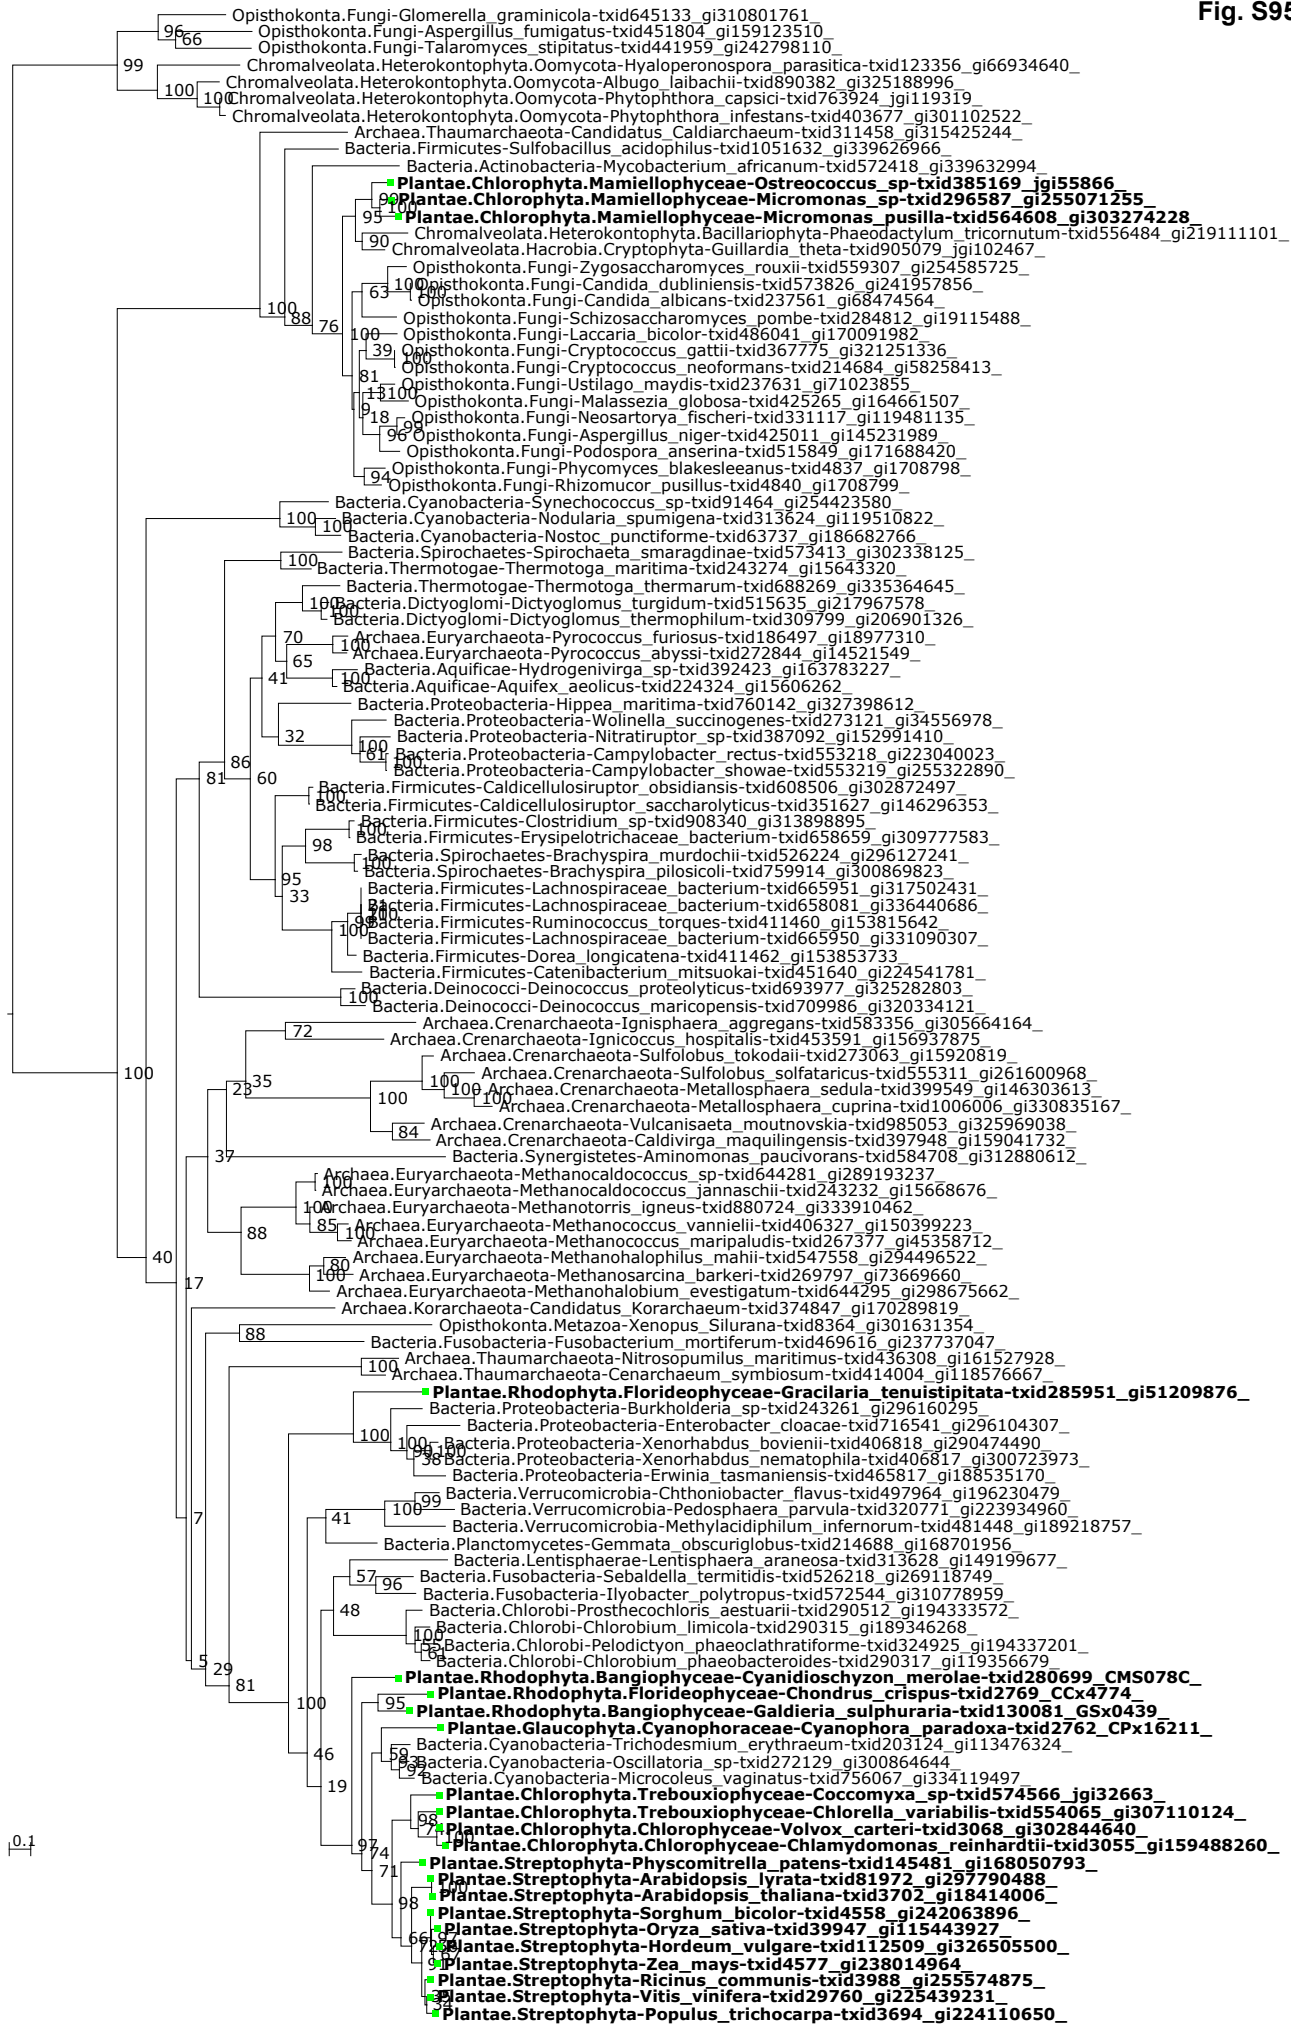

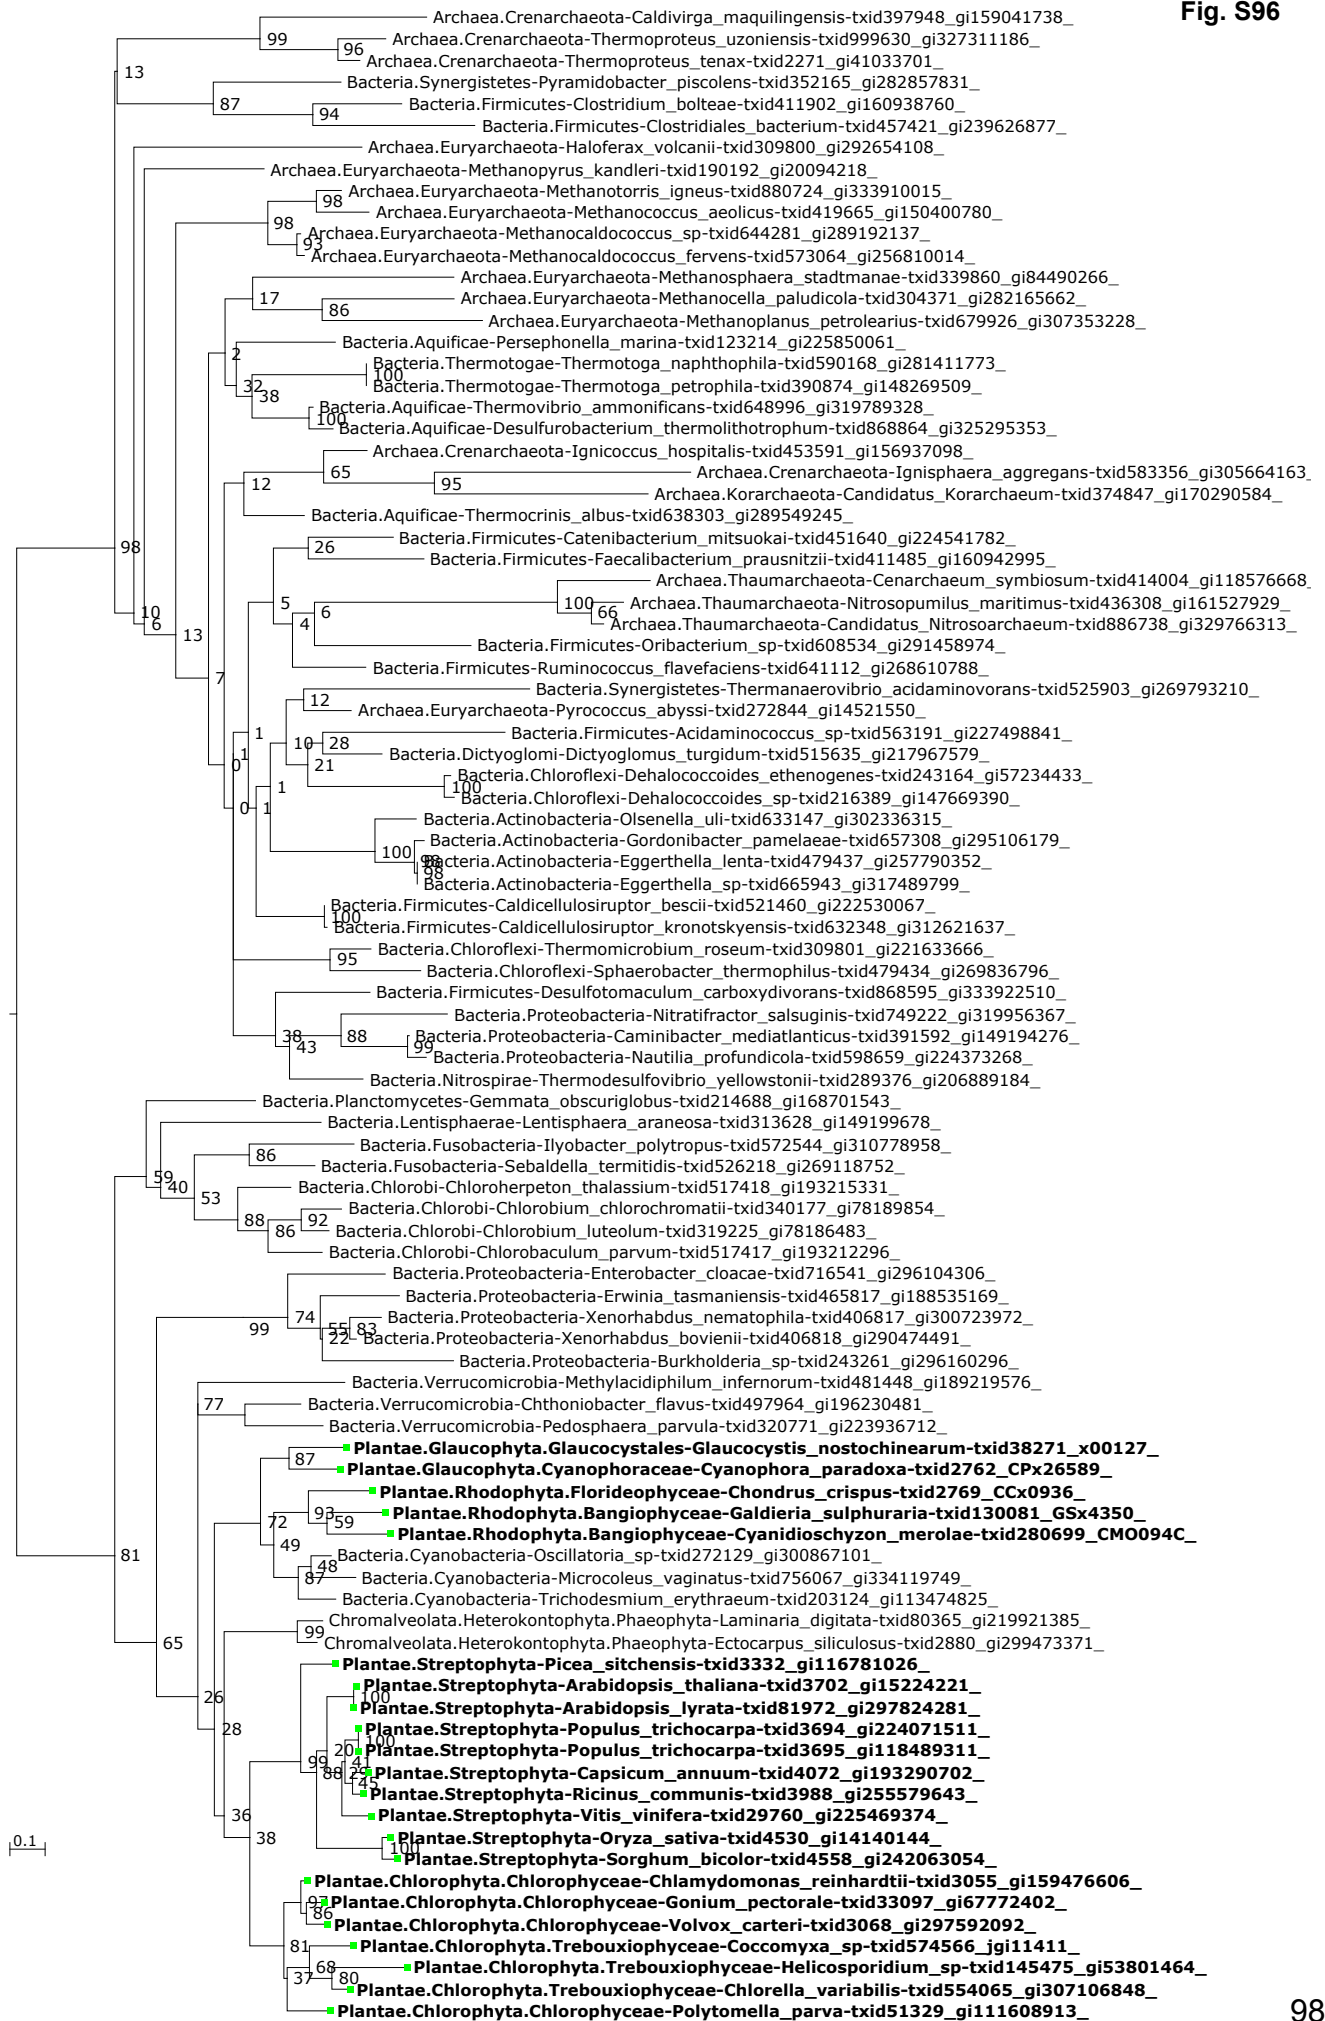

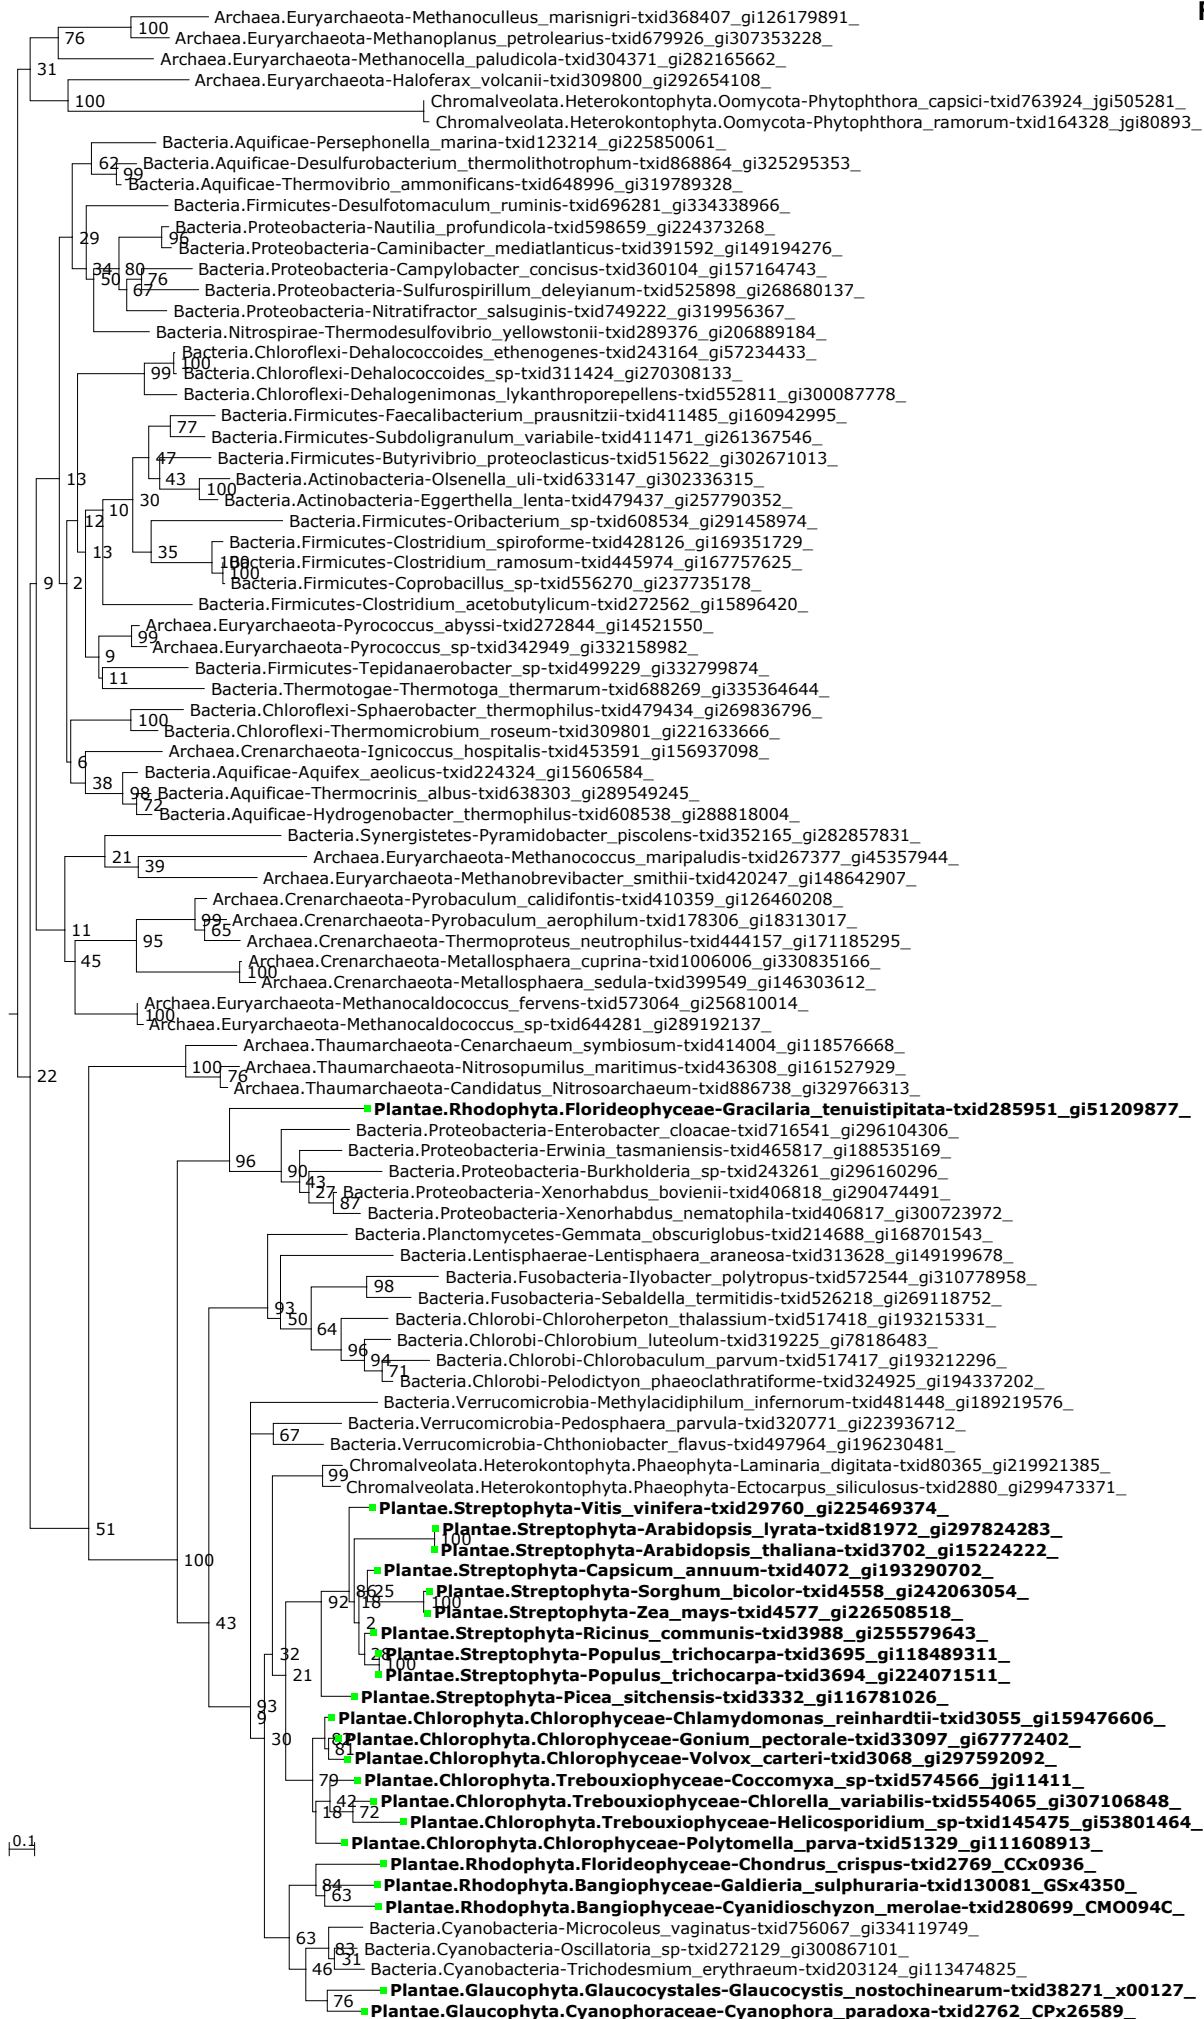

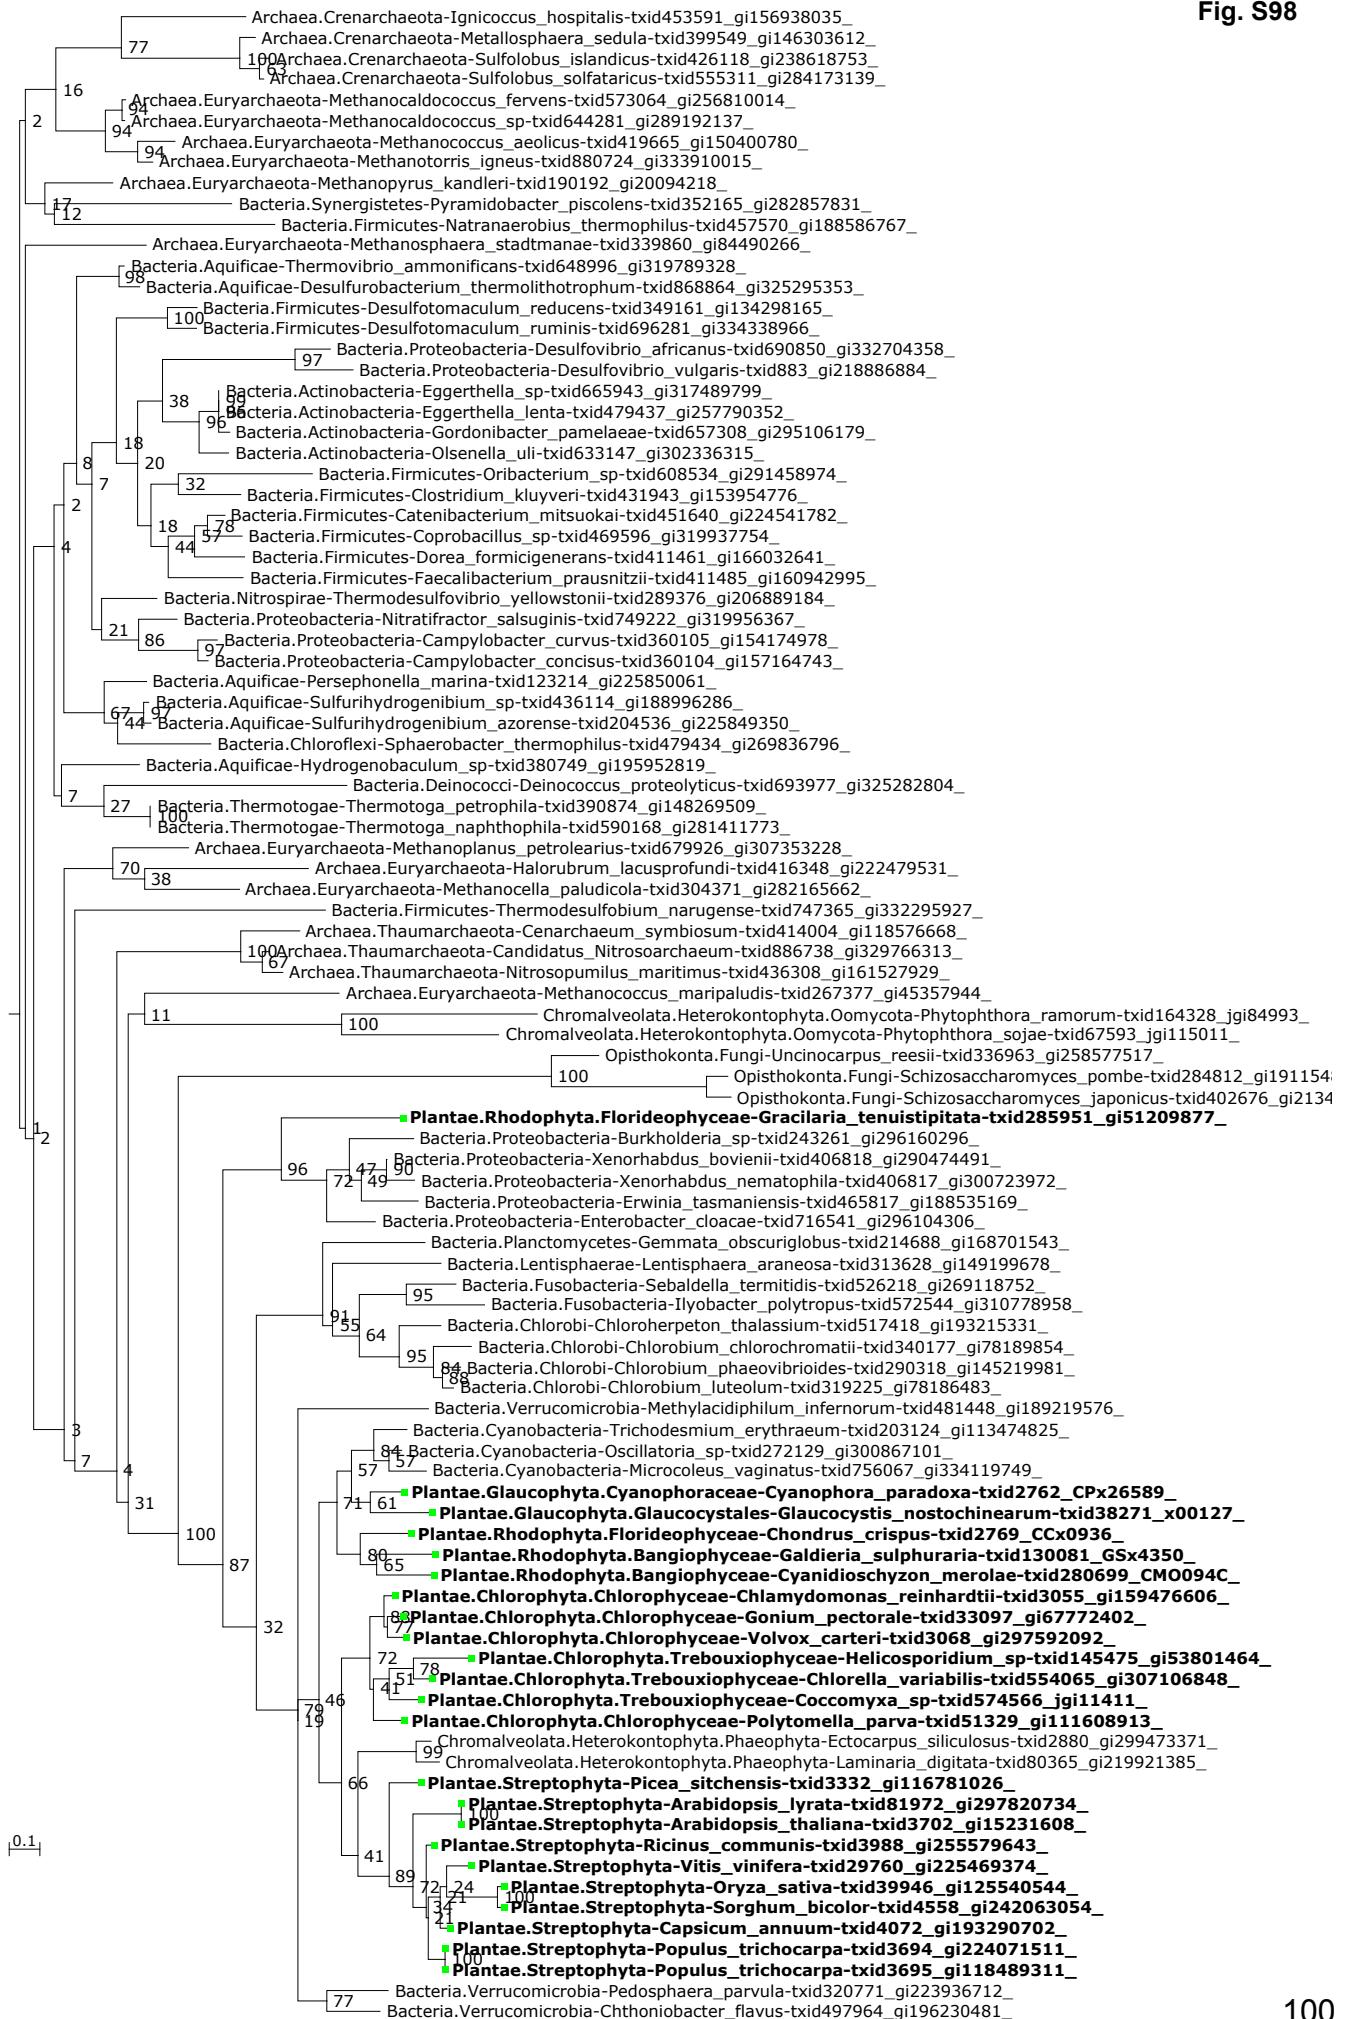

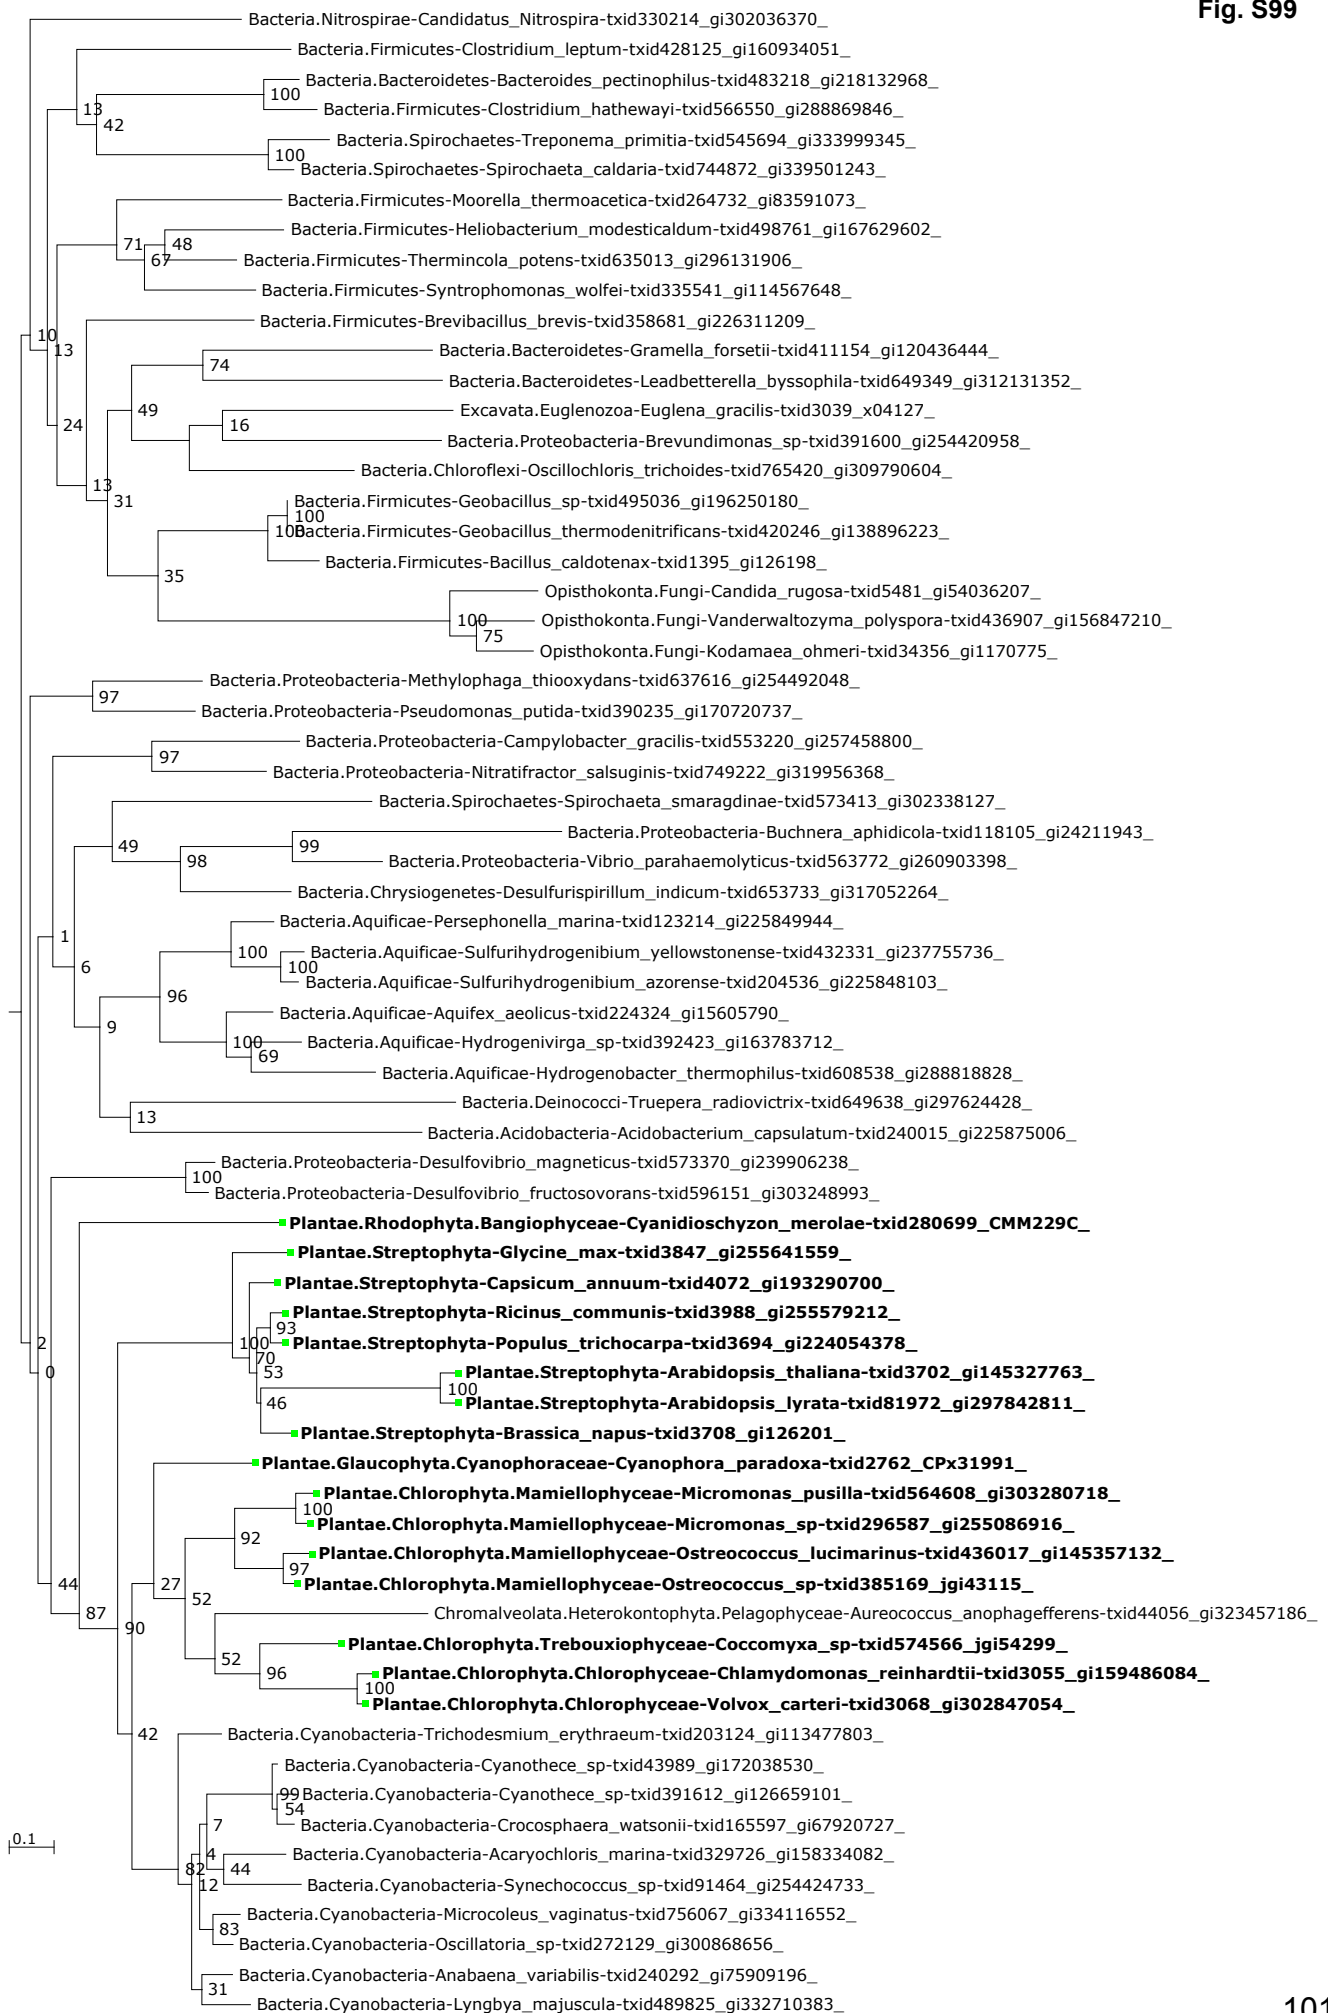

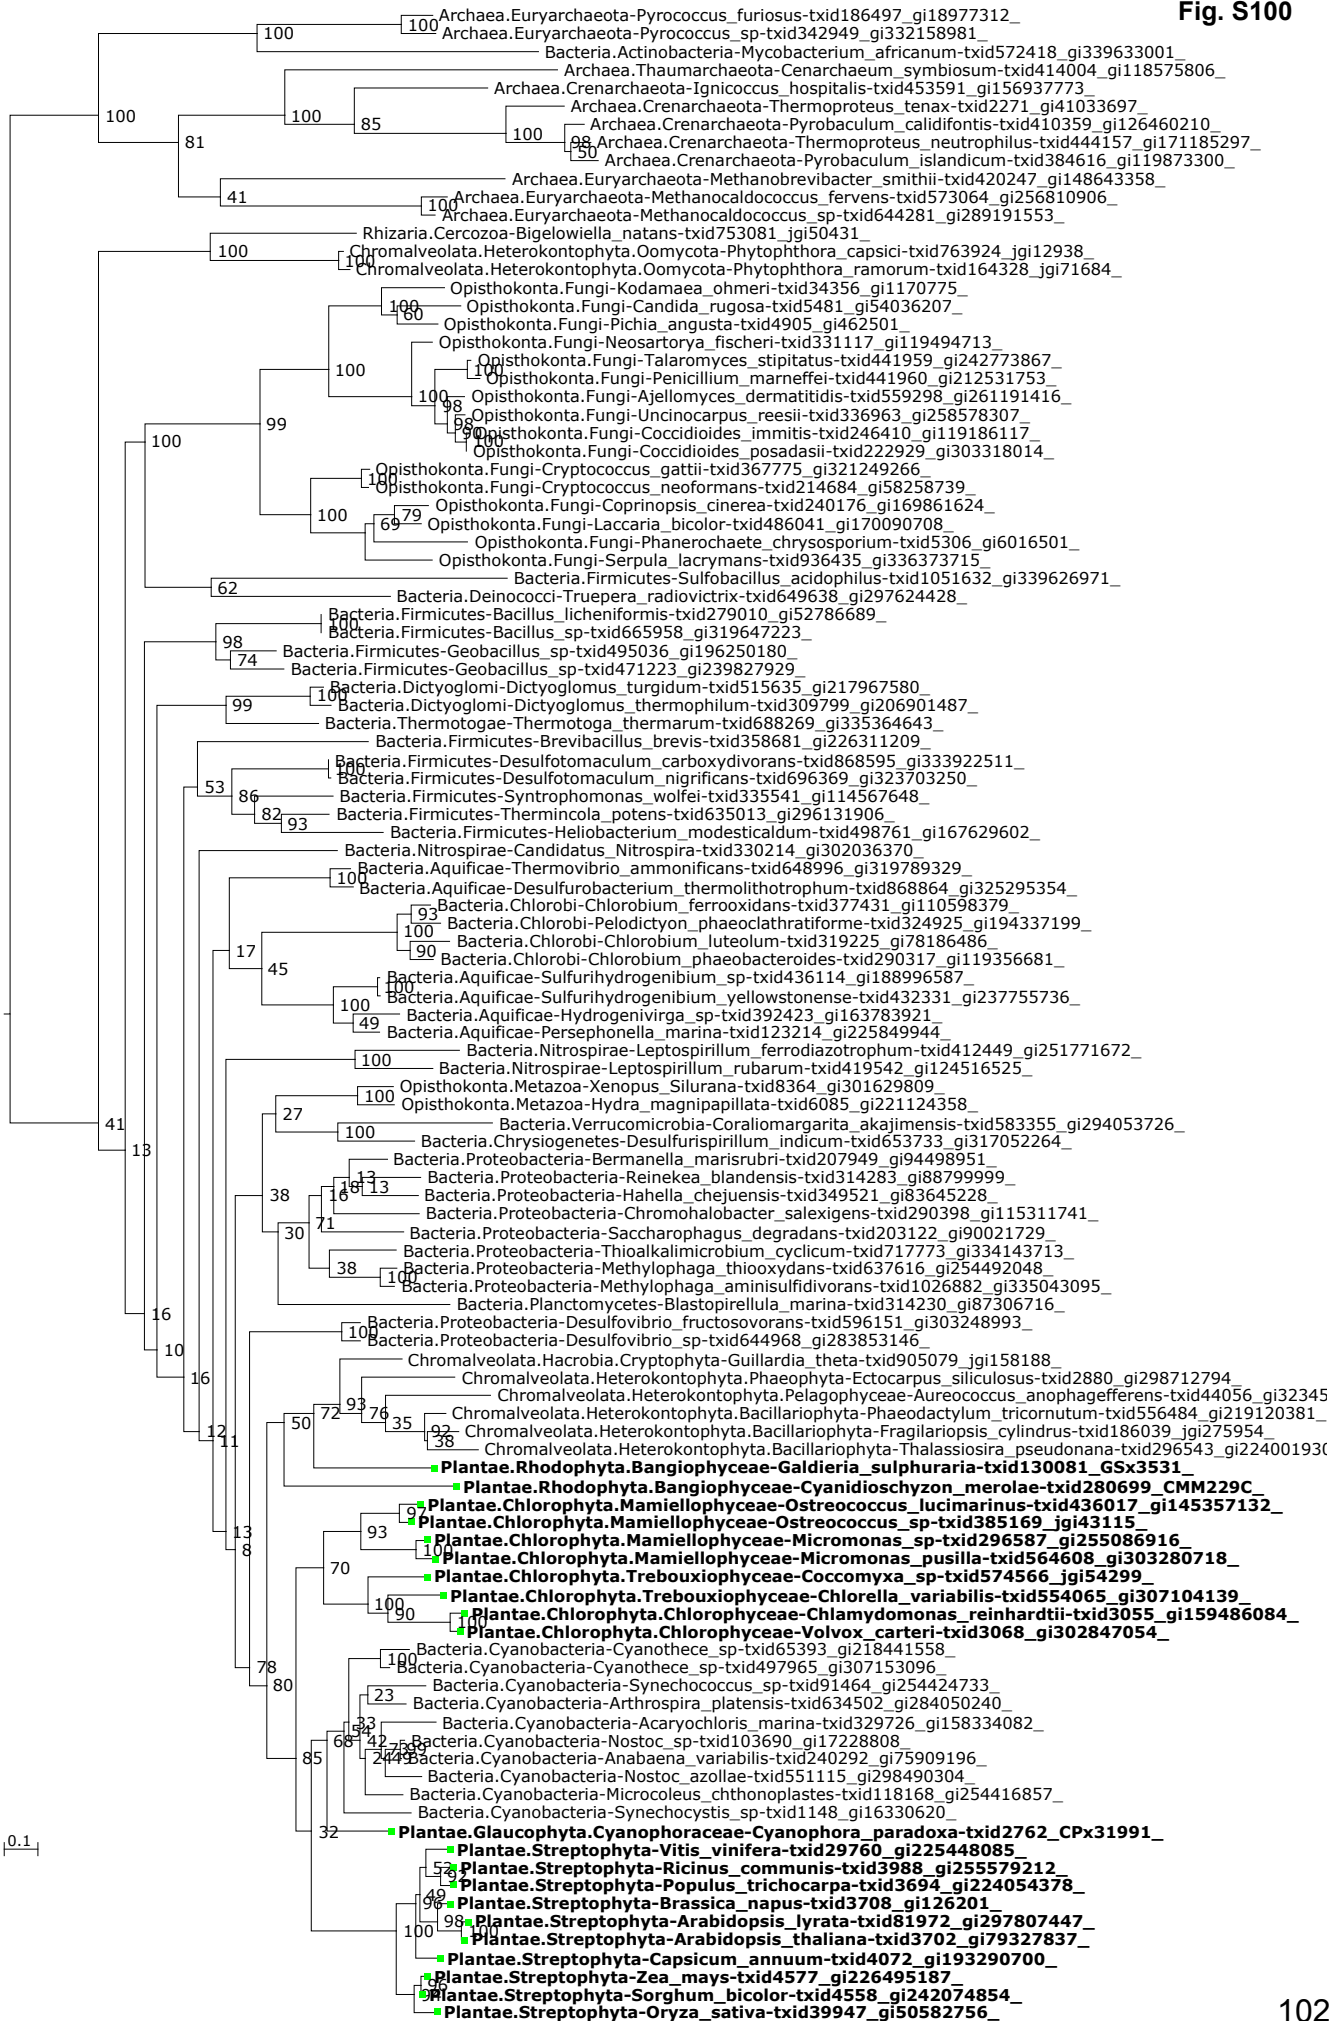

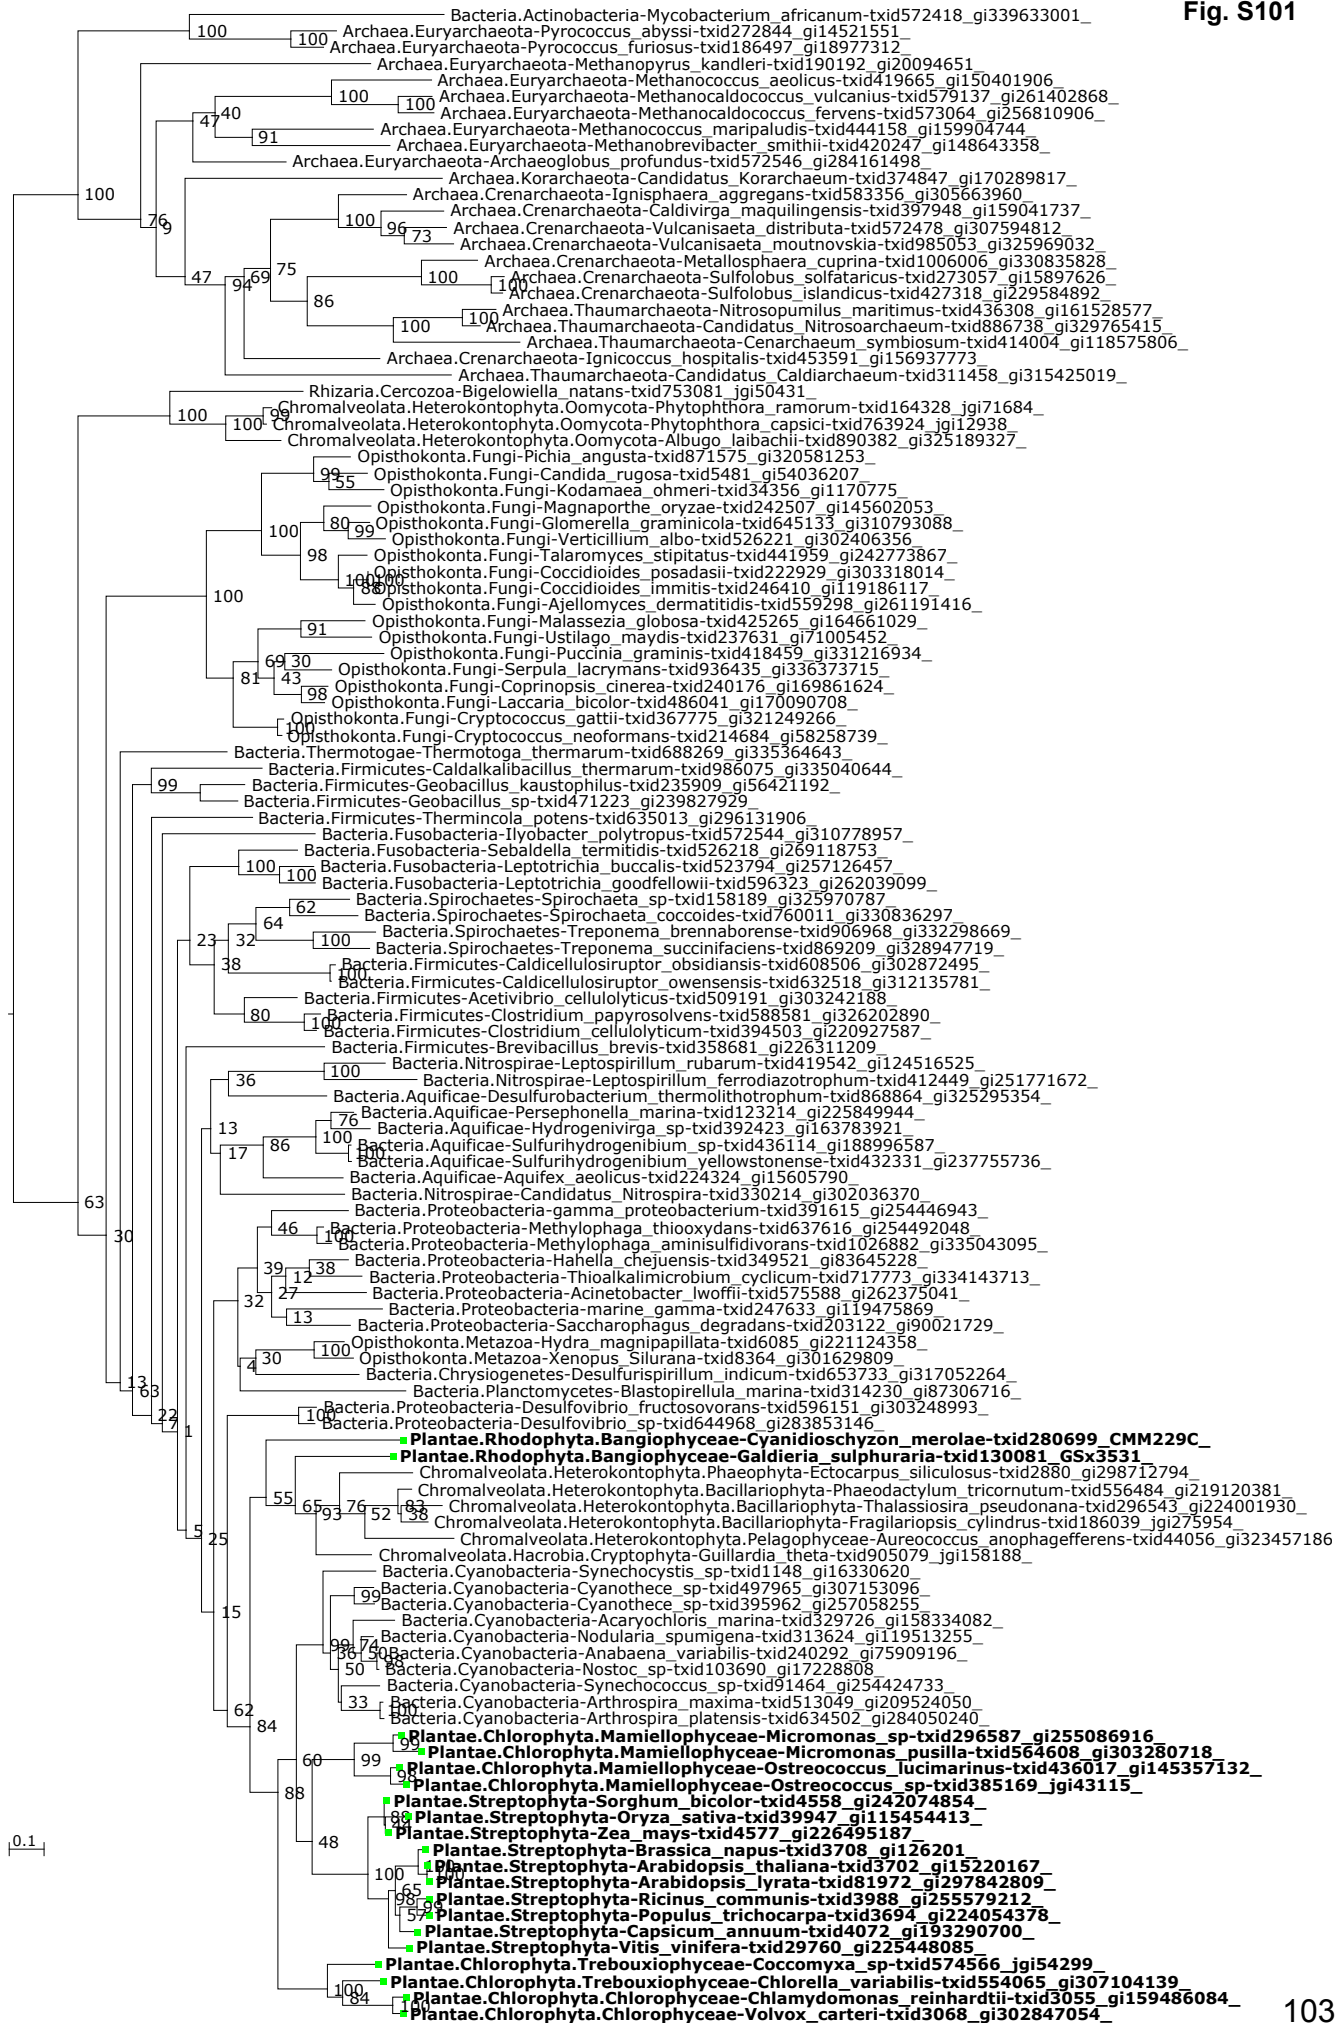

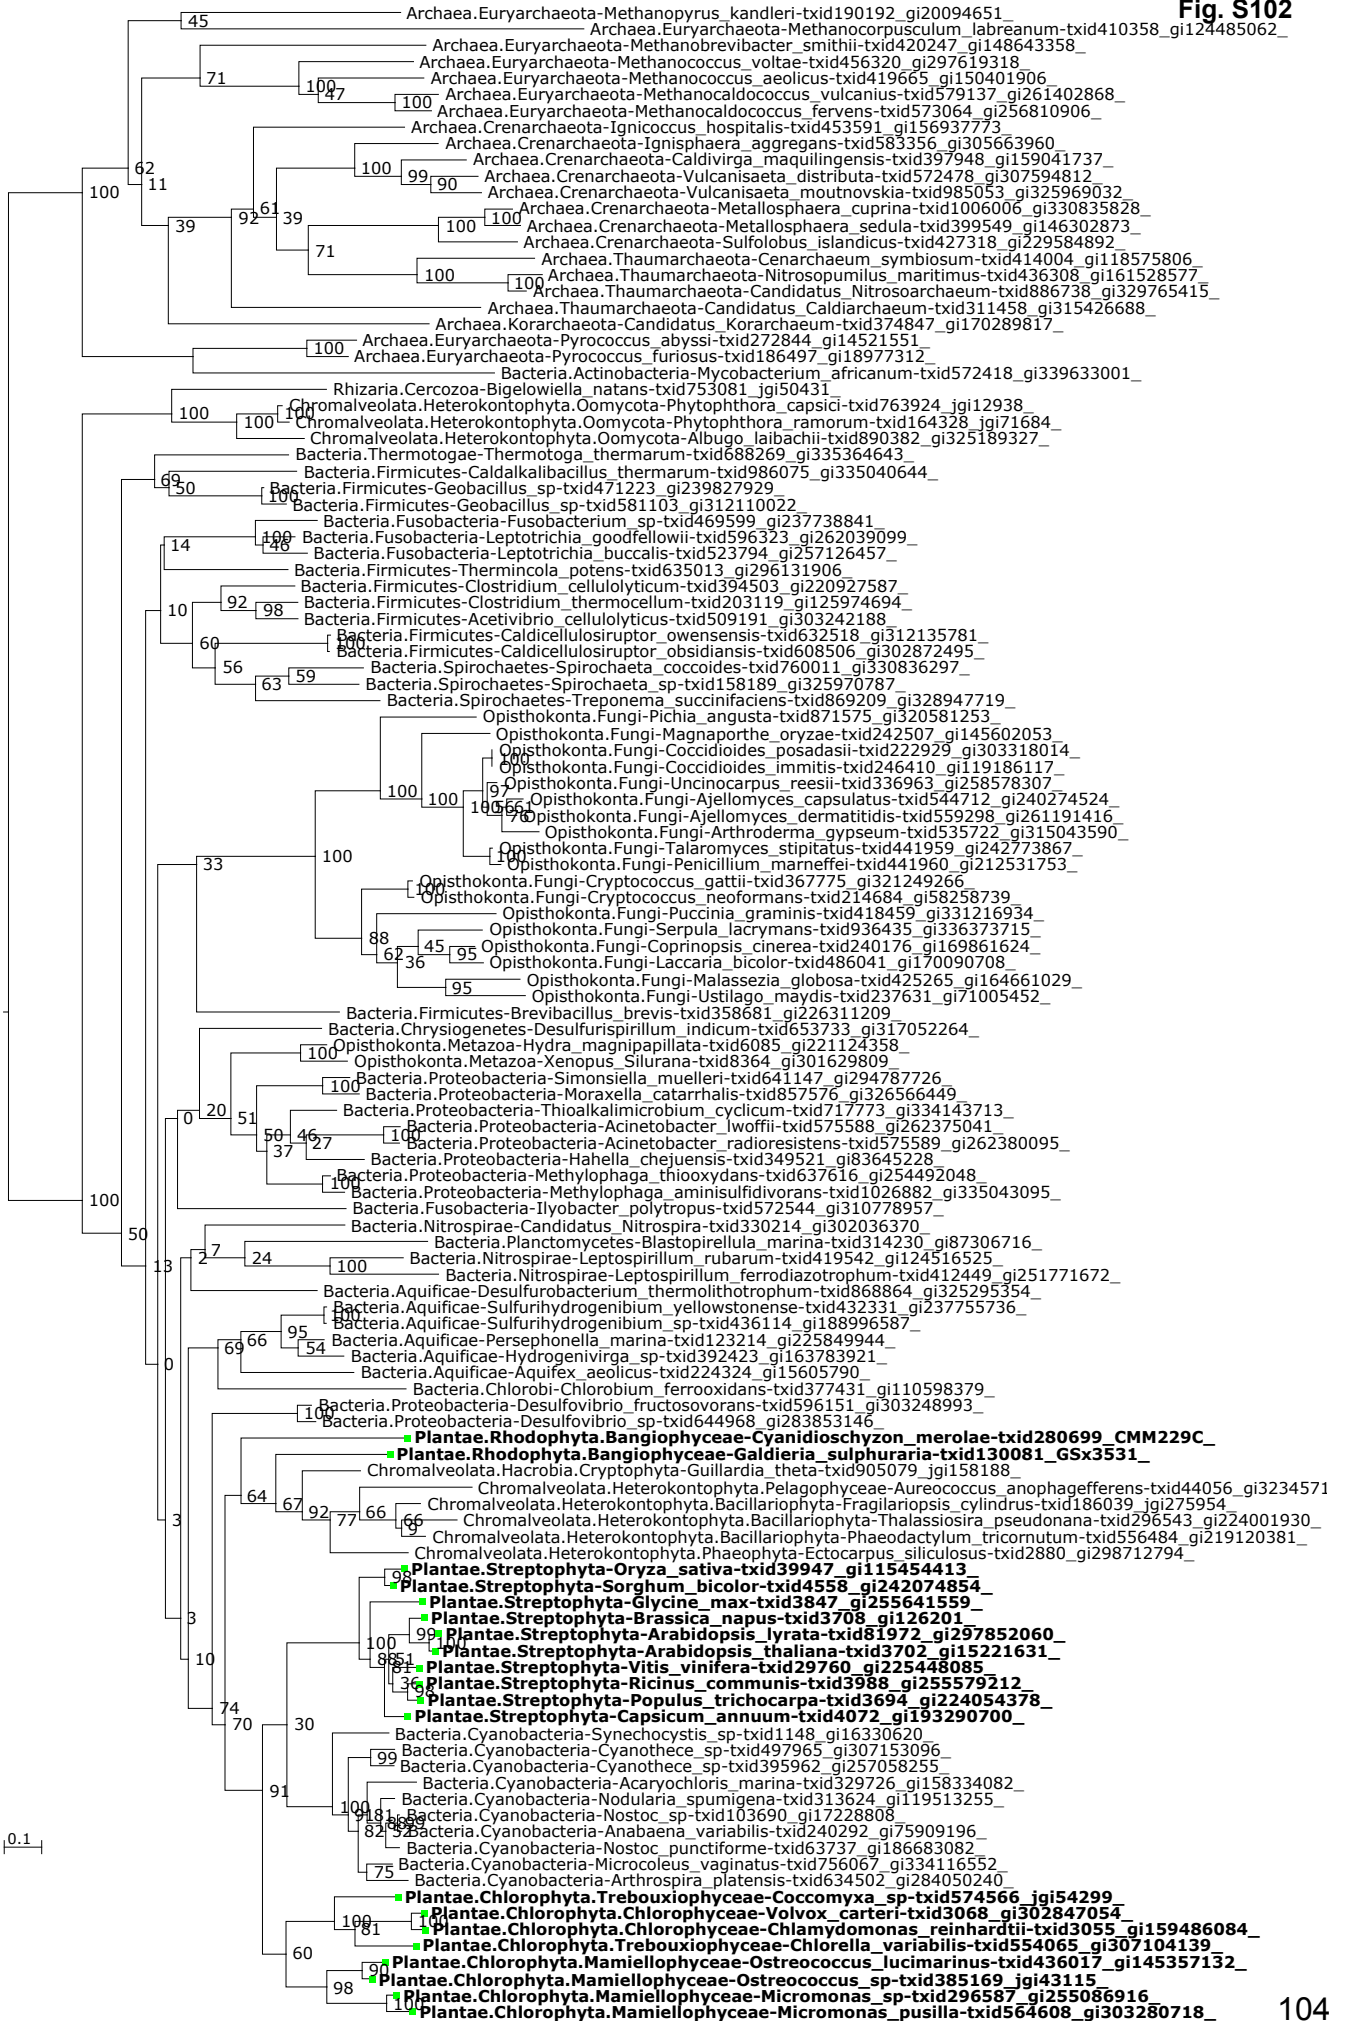



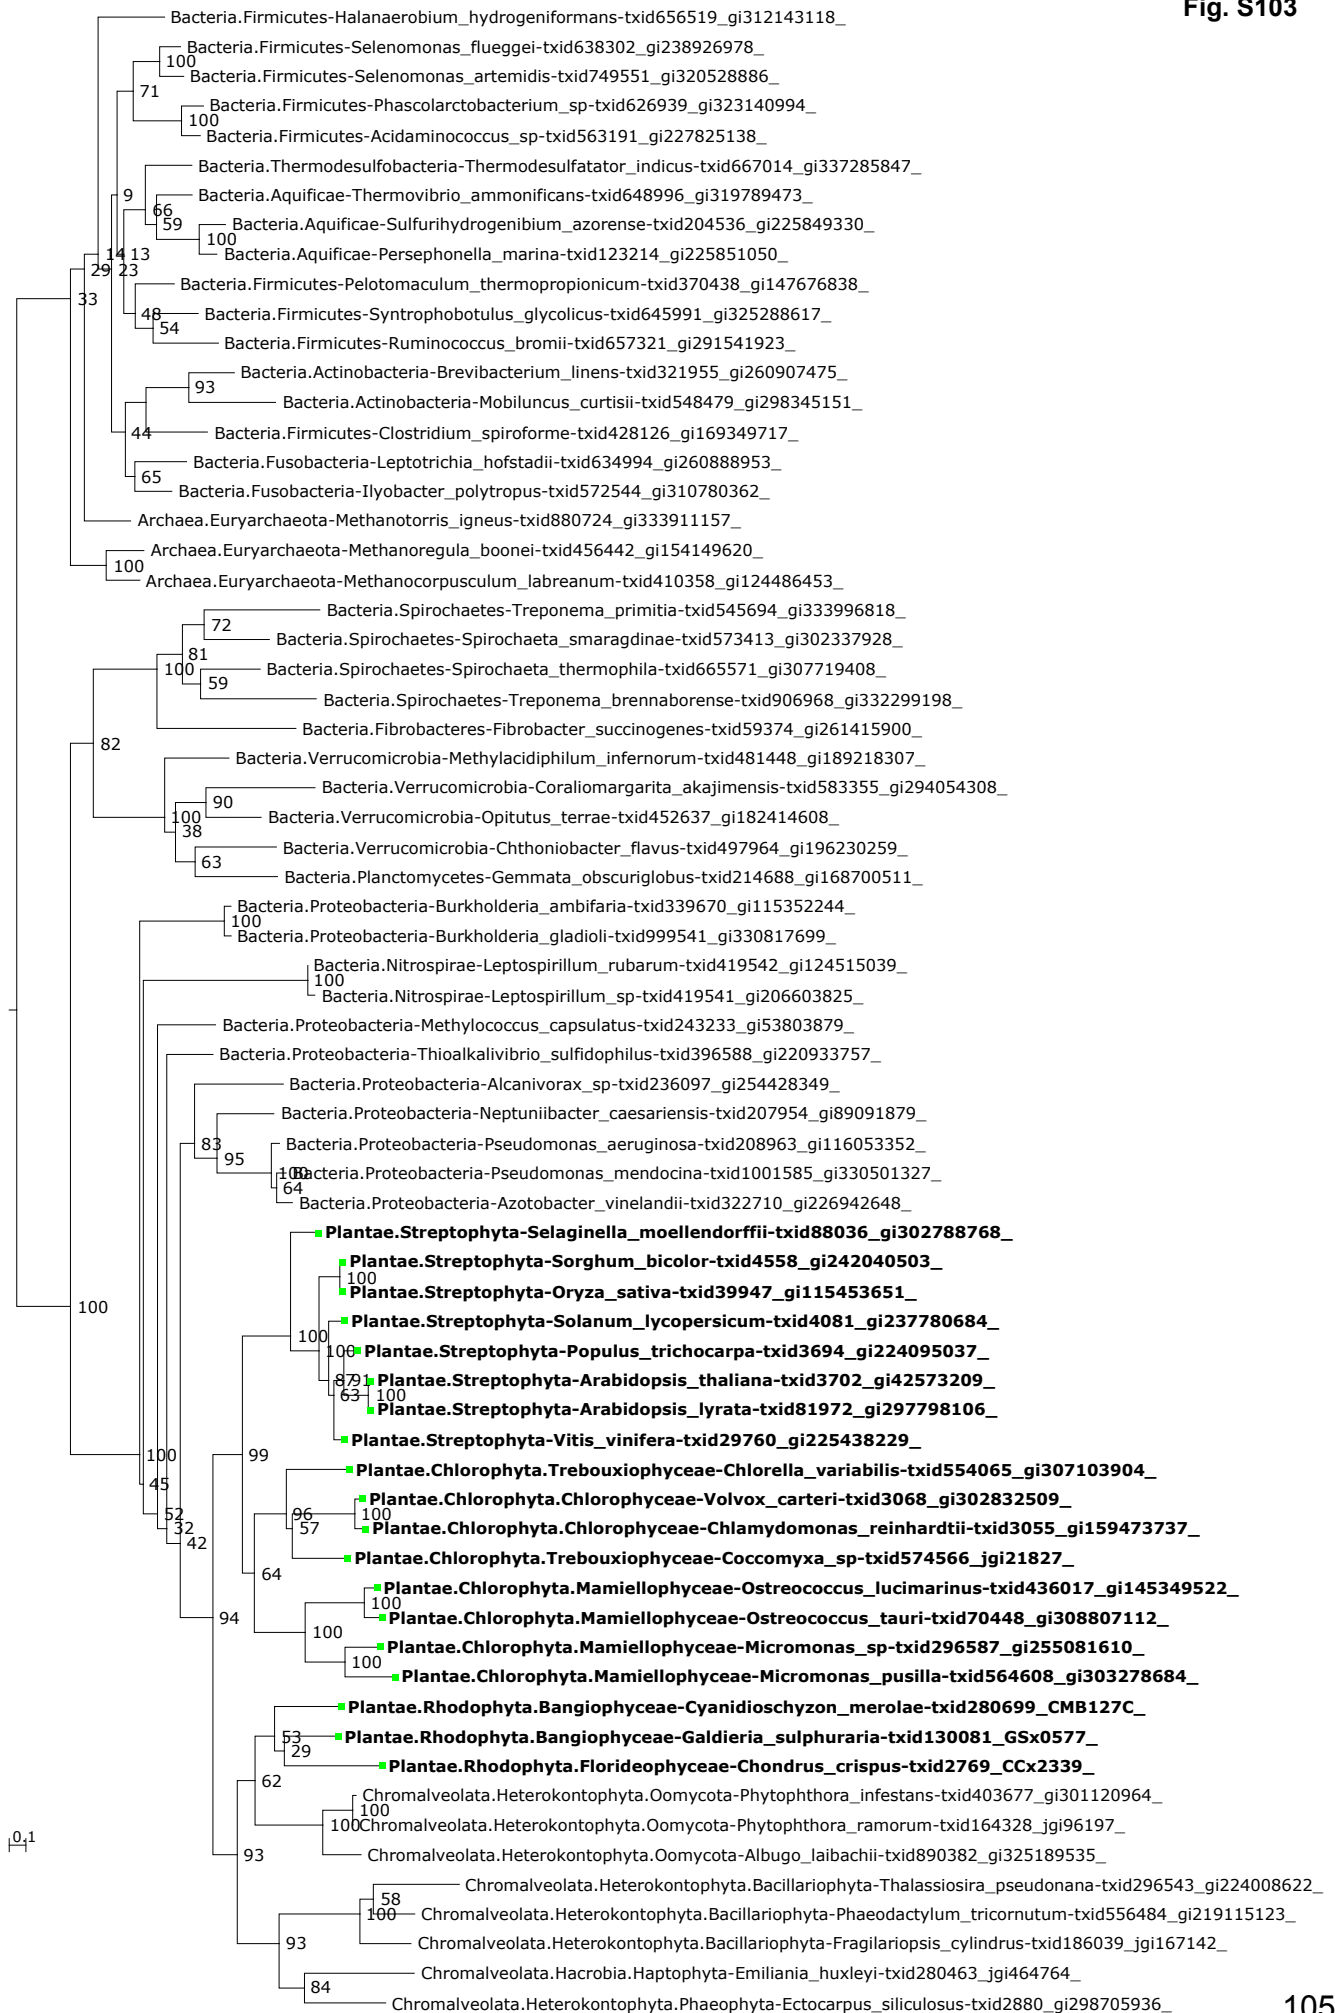

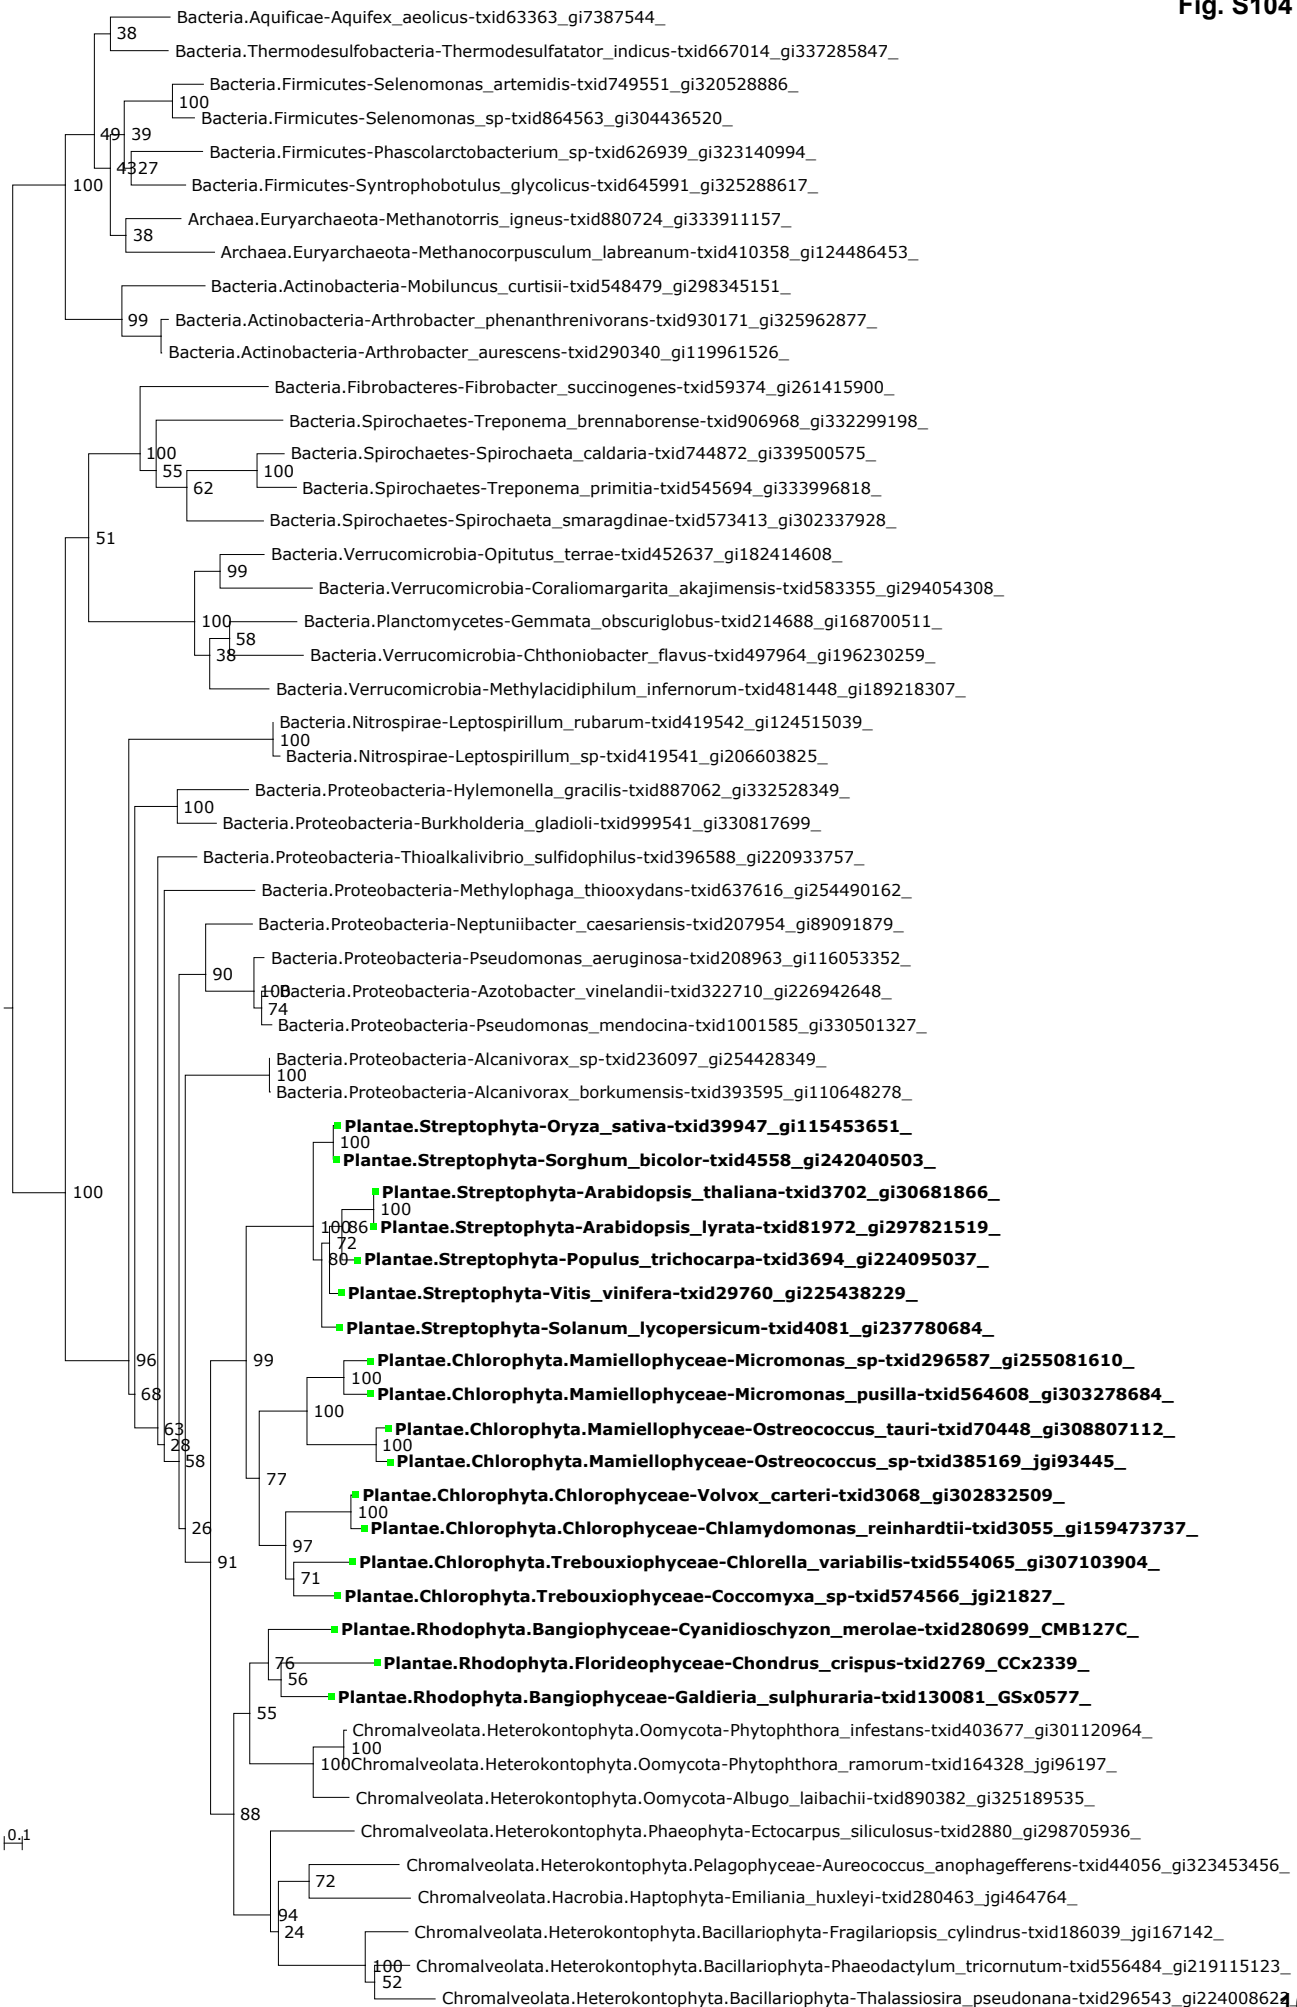

0.1

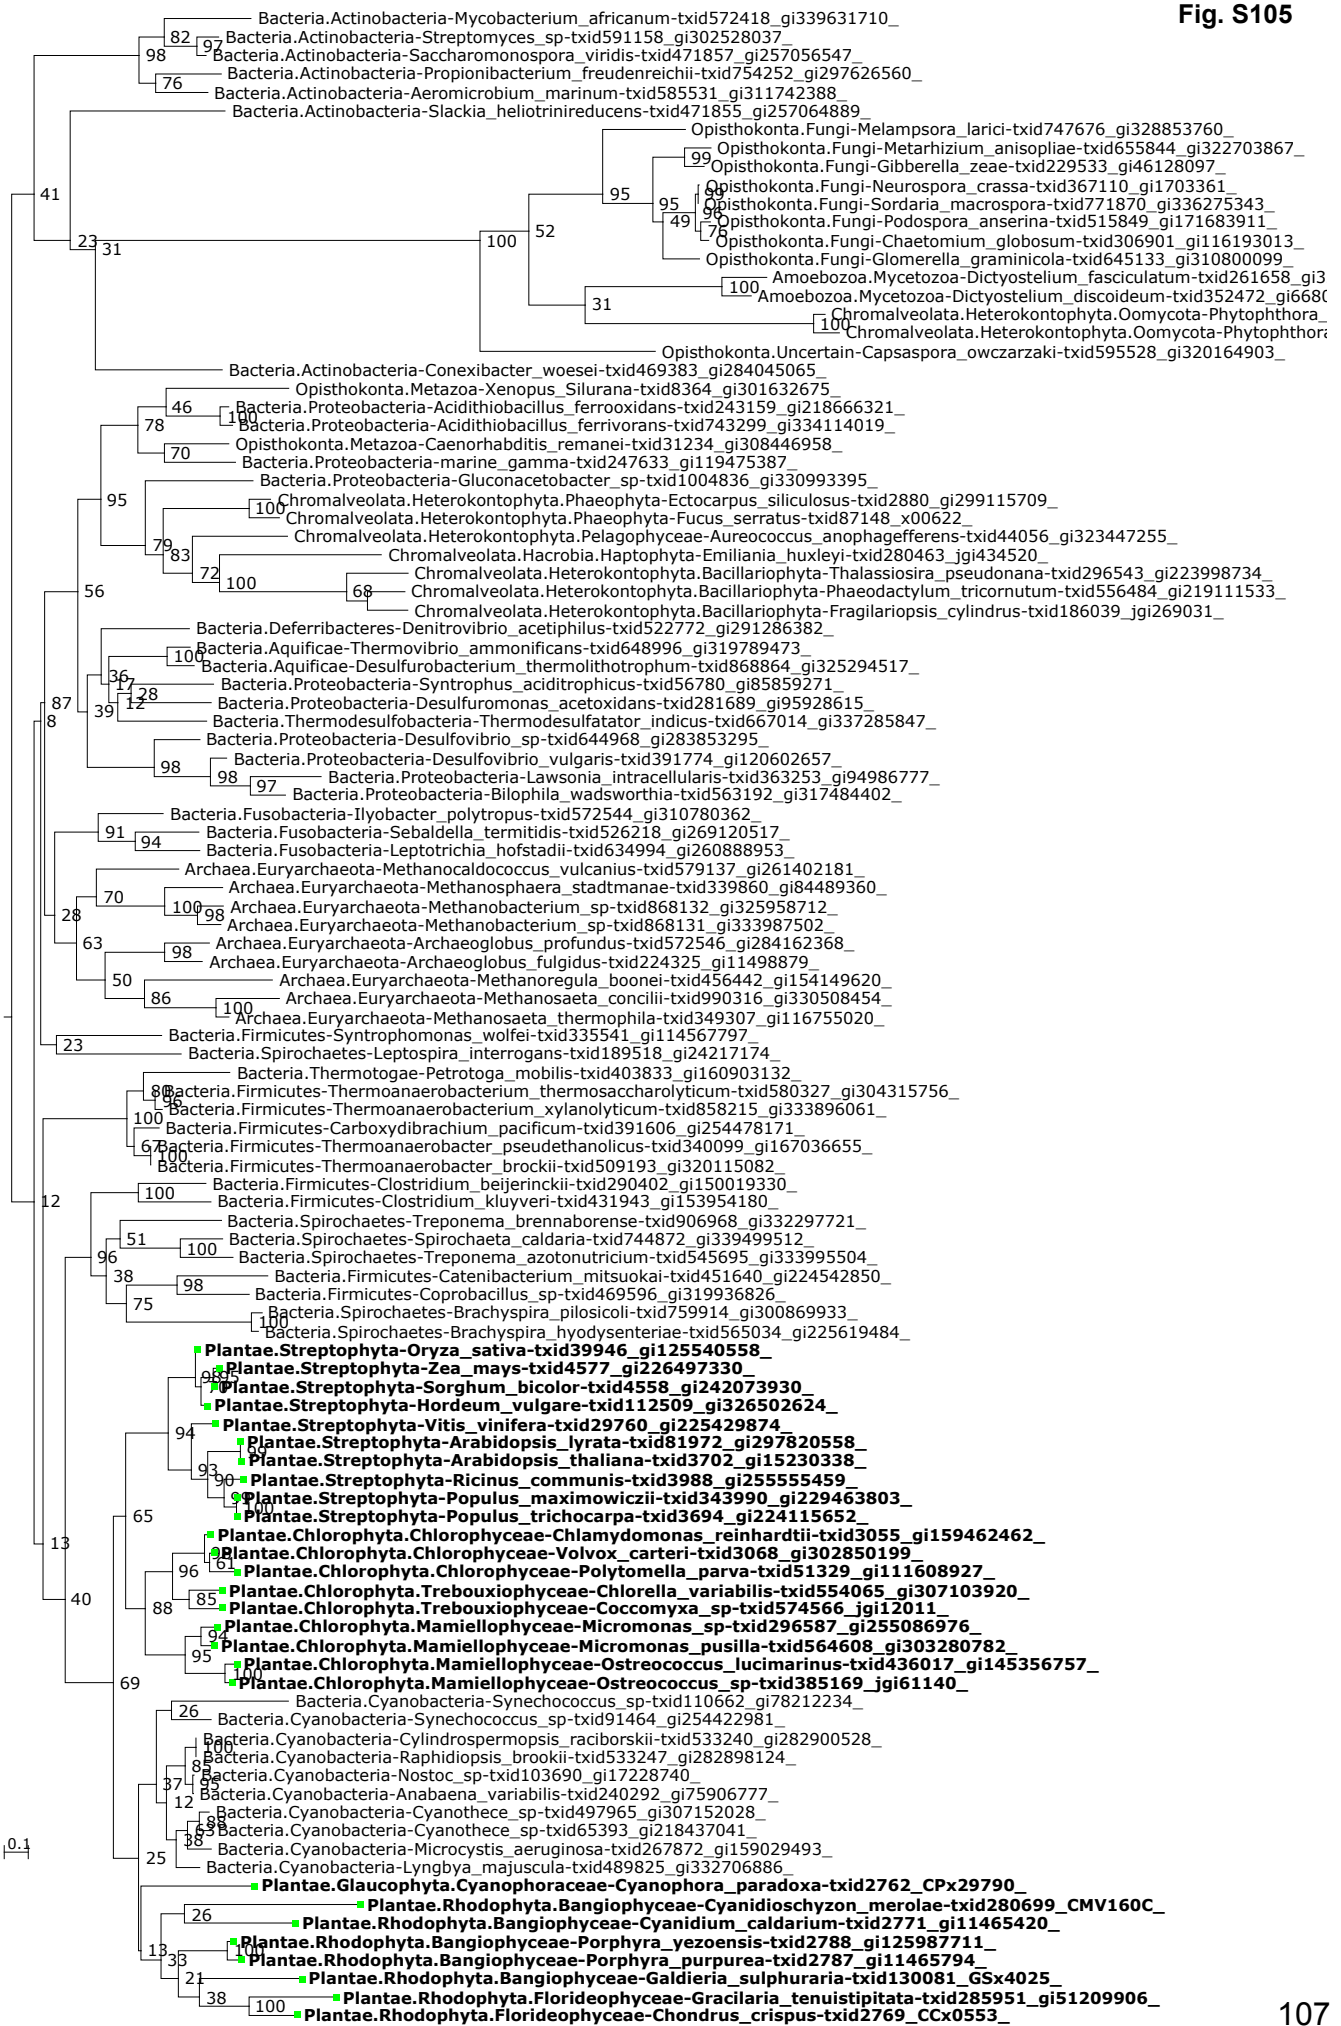

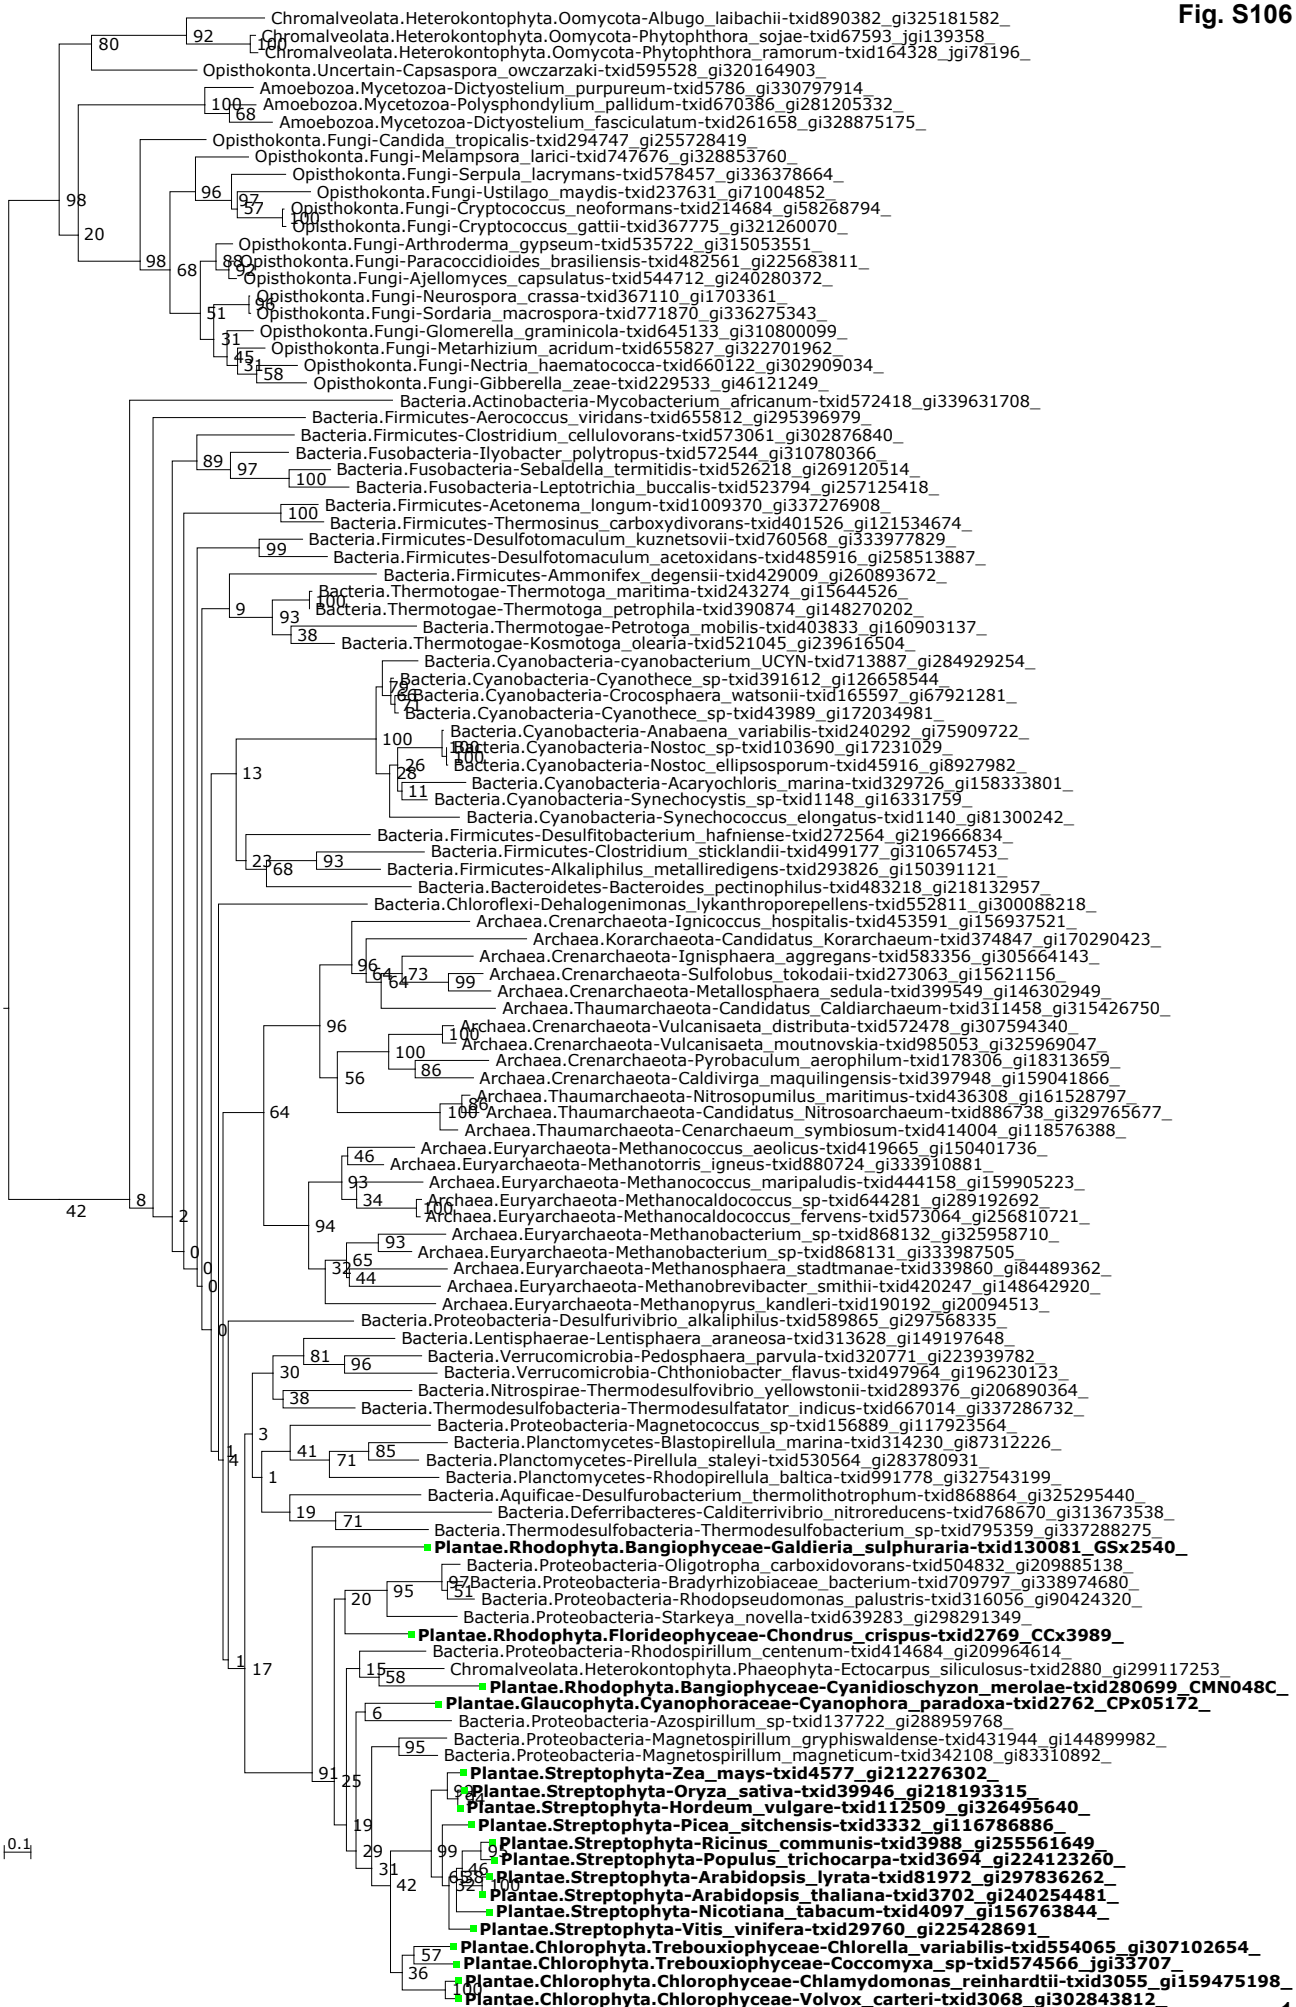

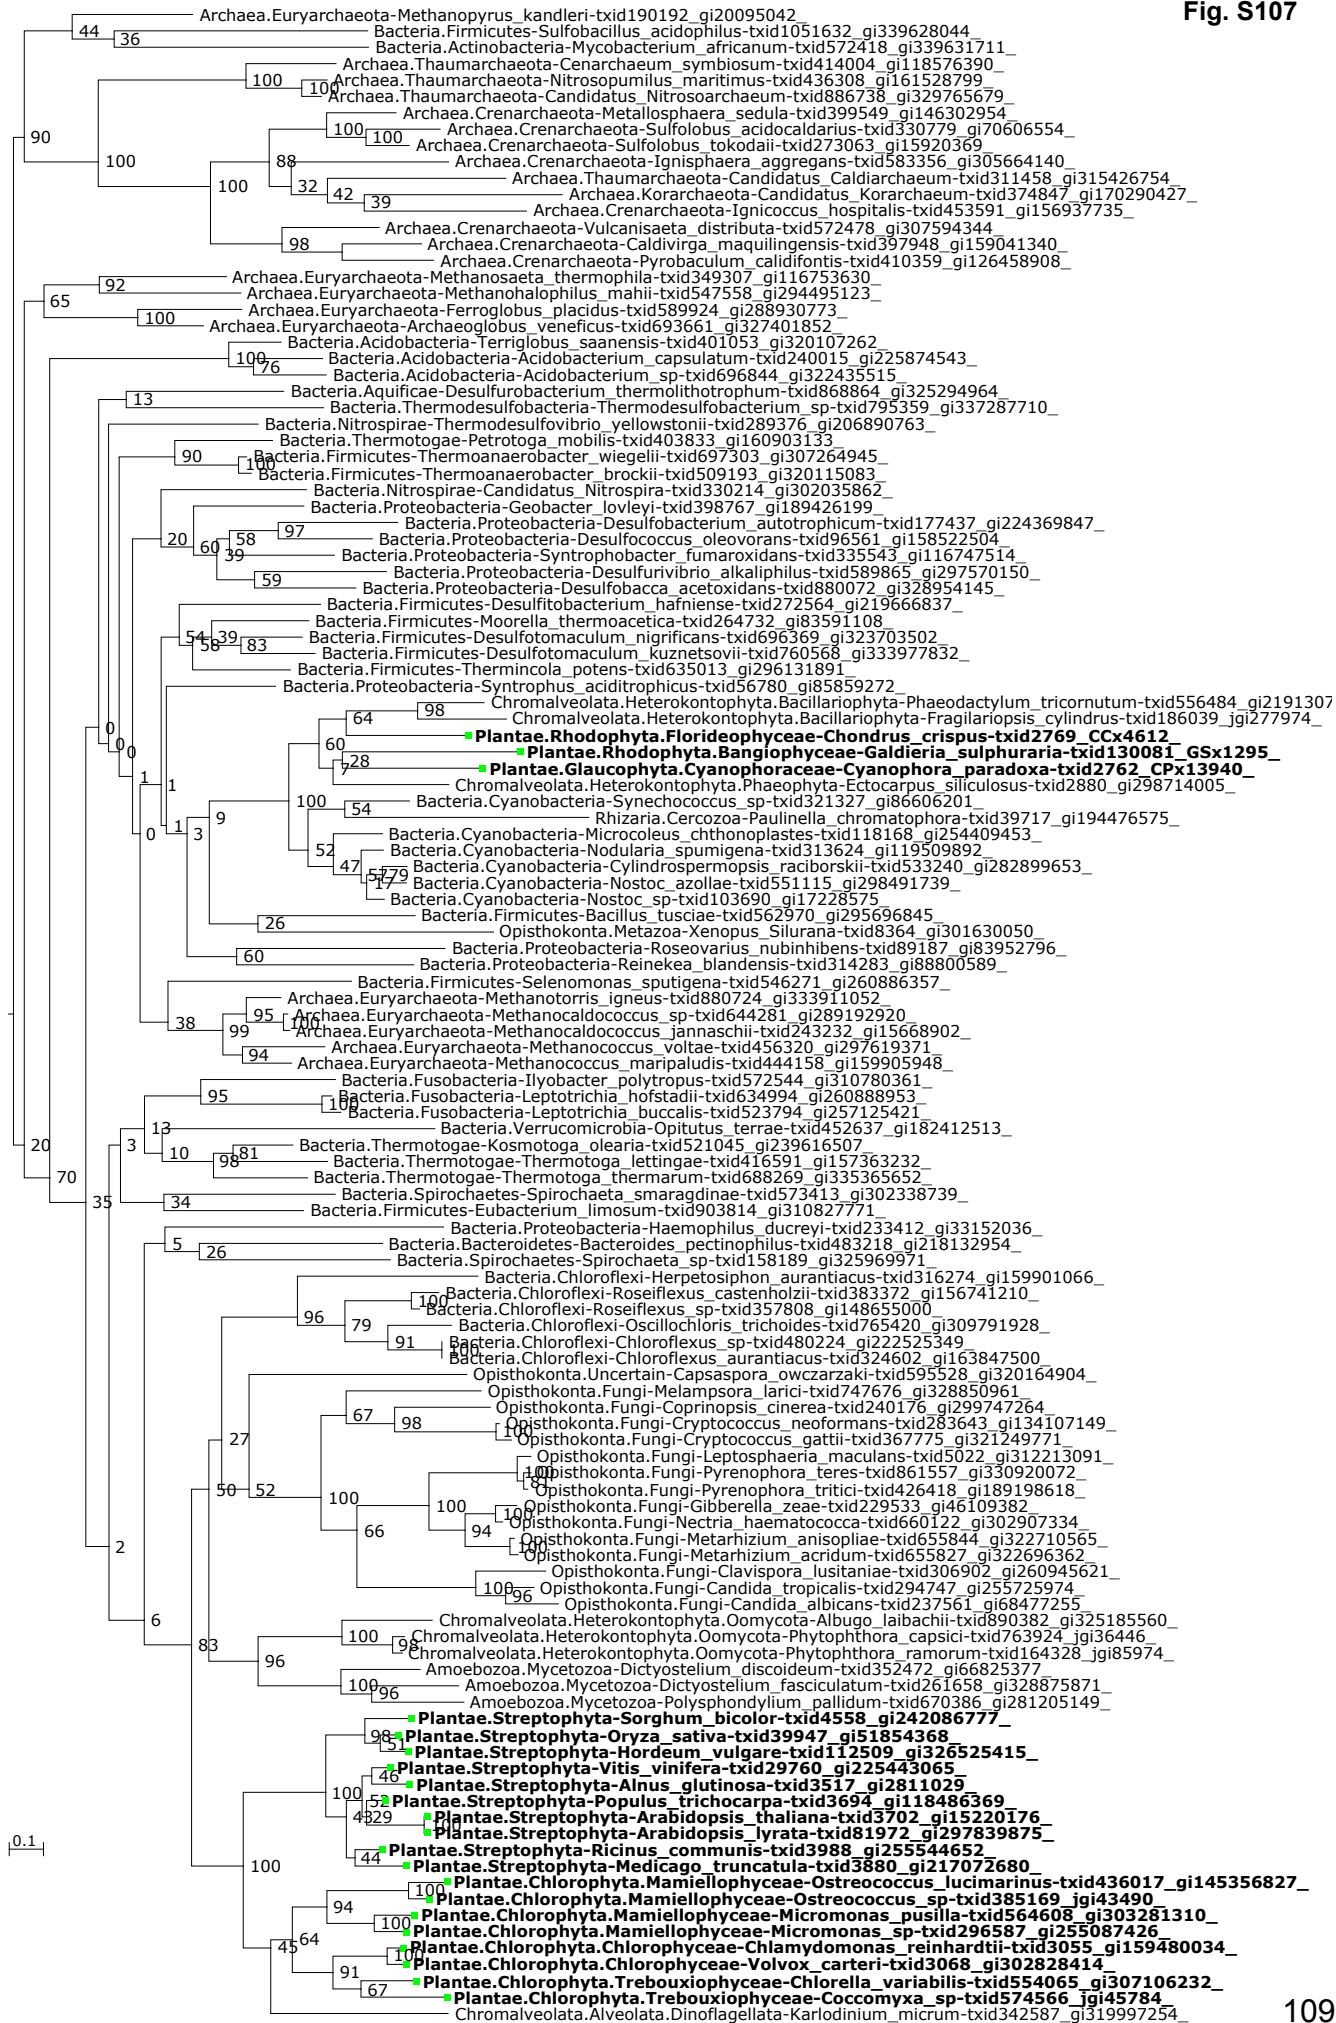

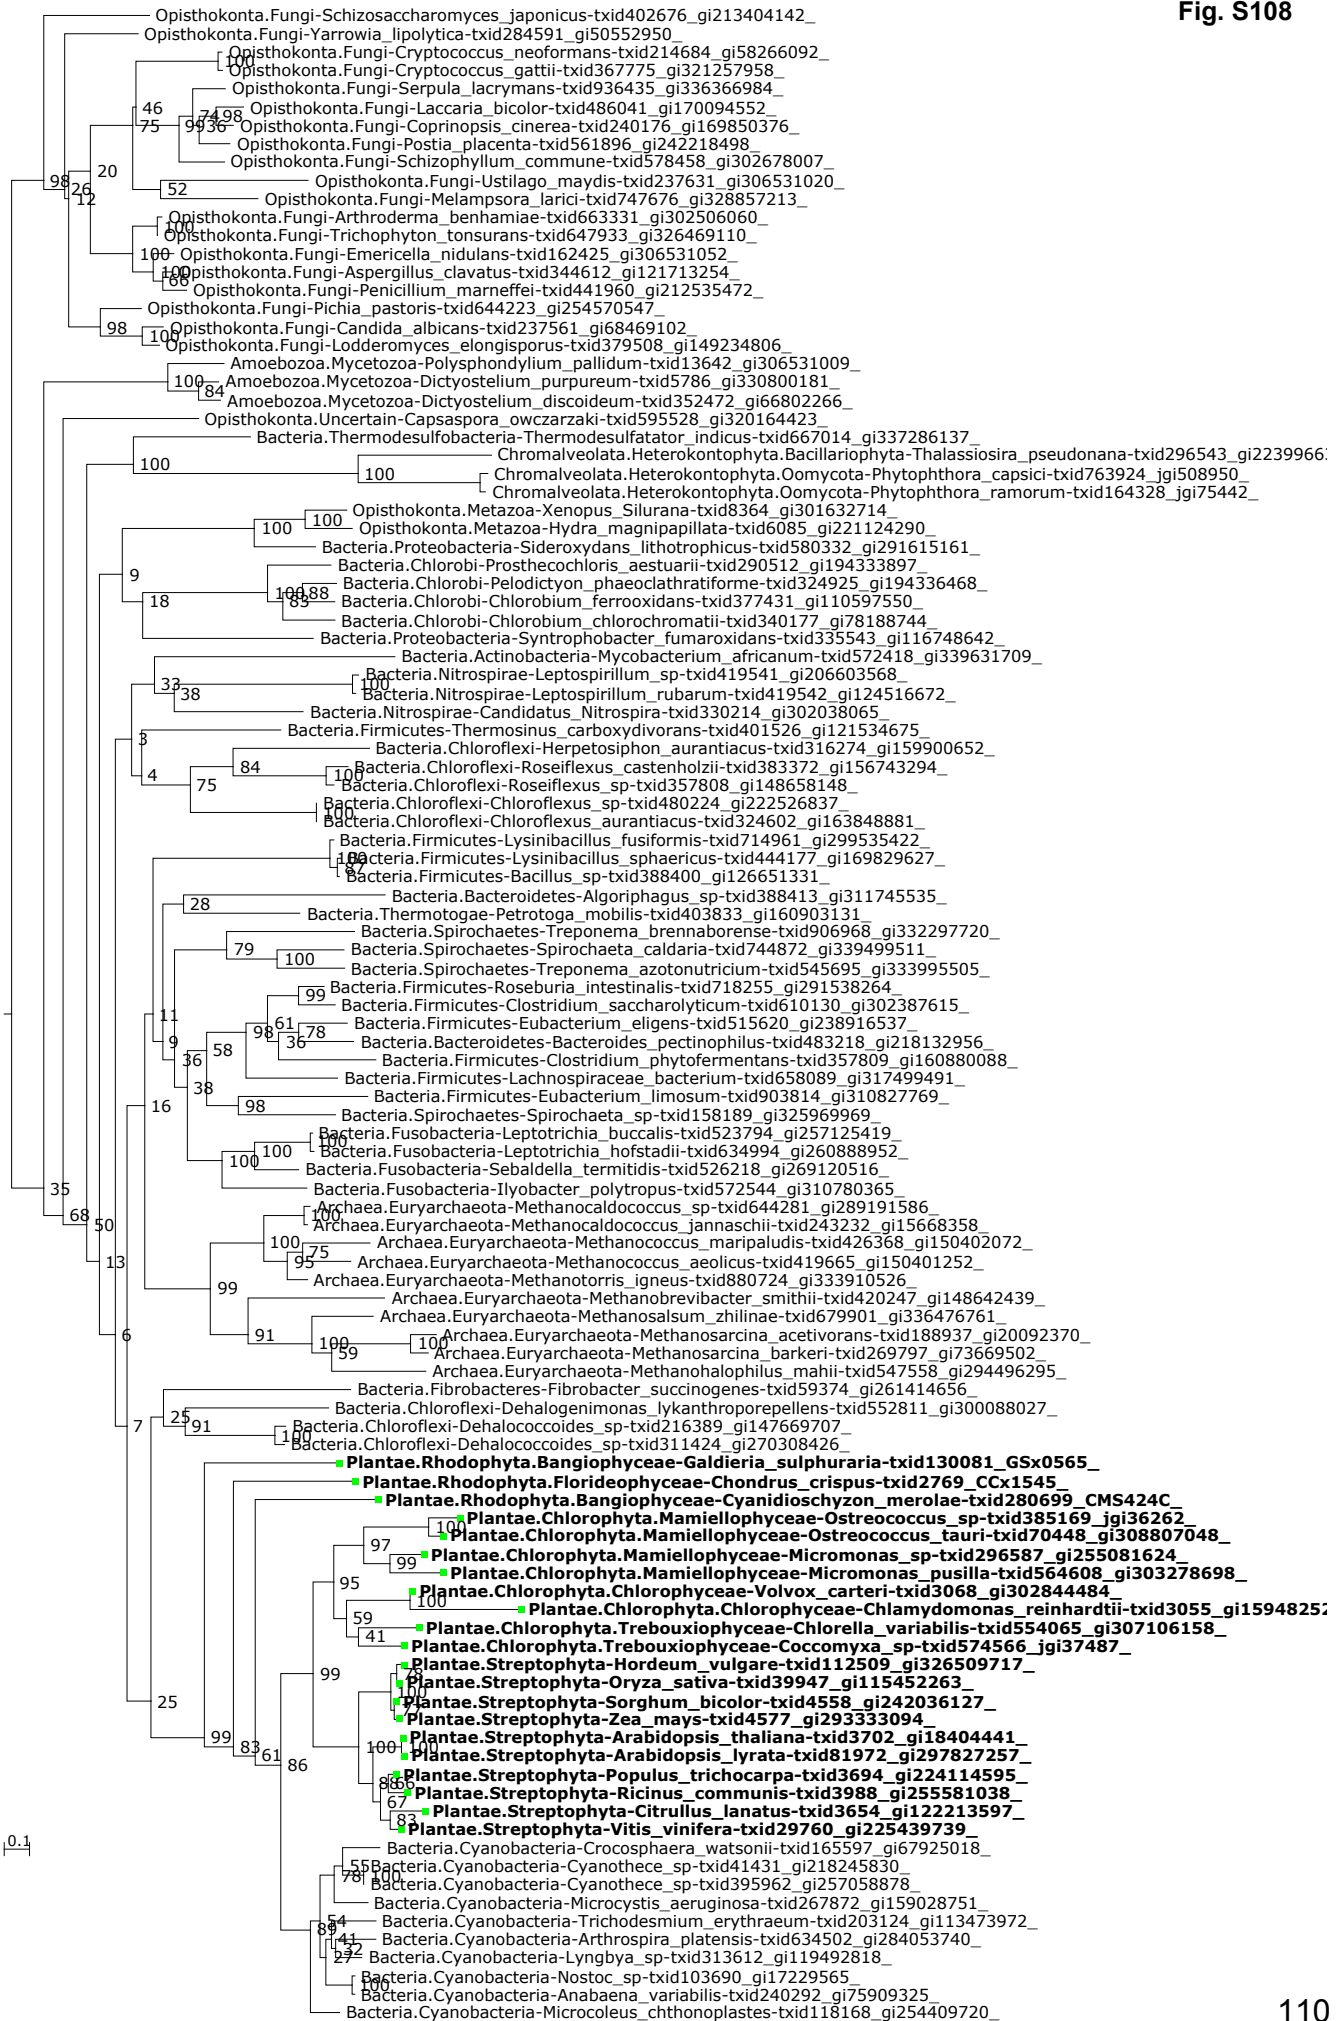

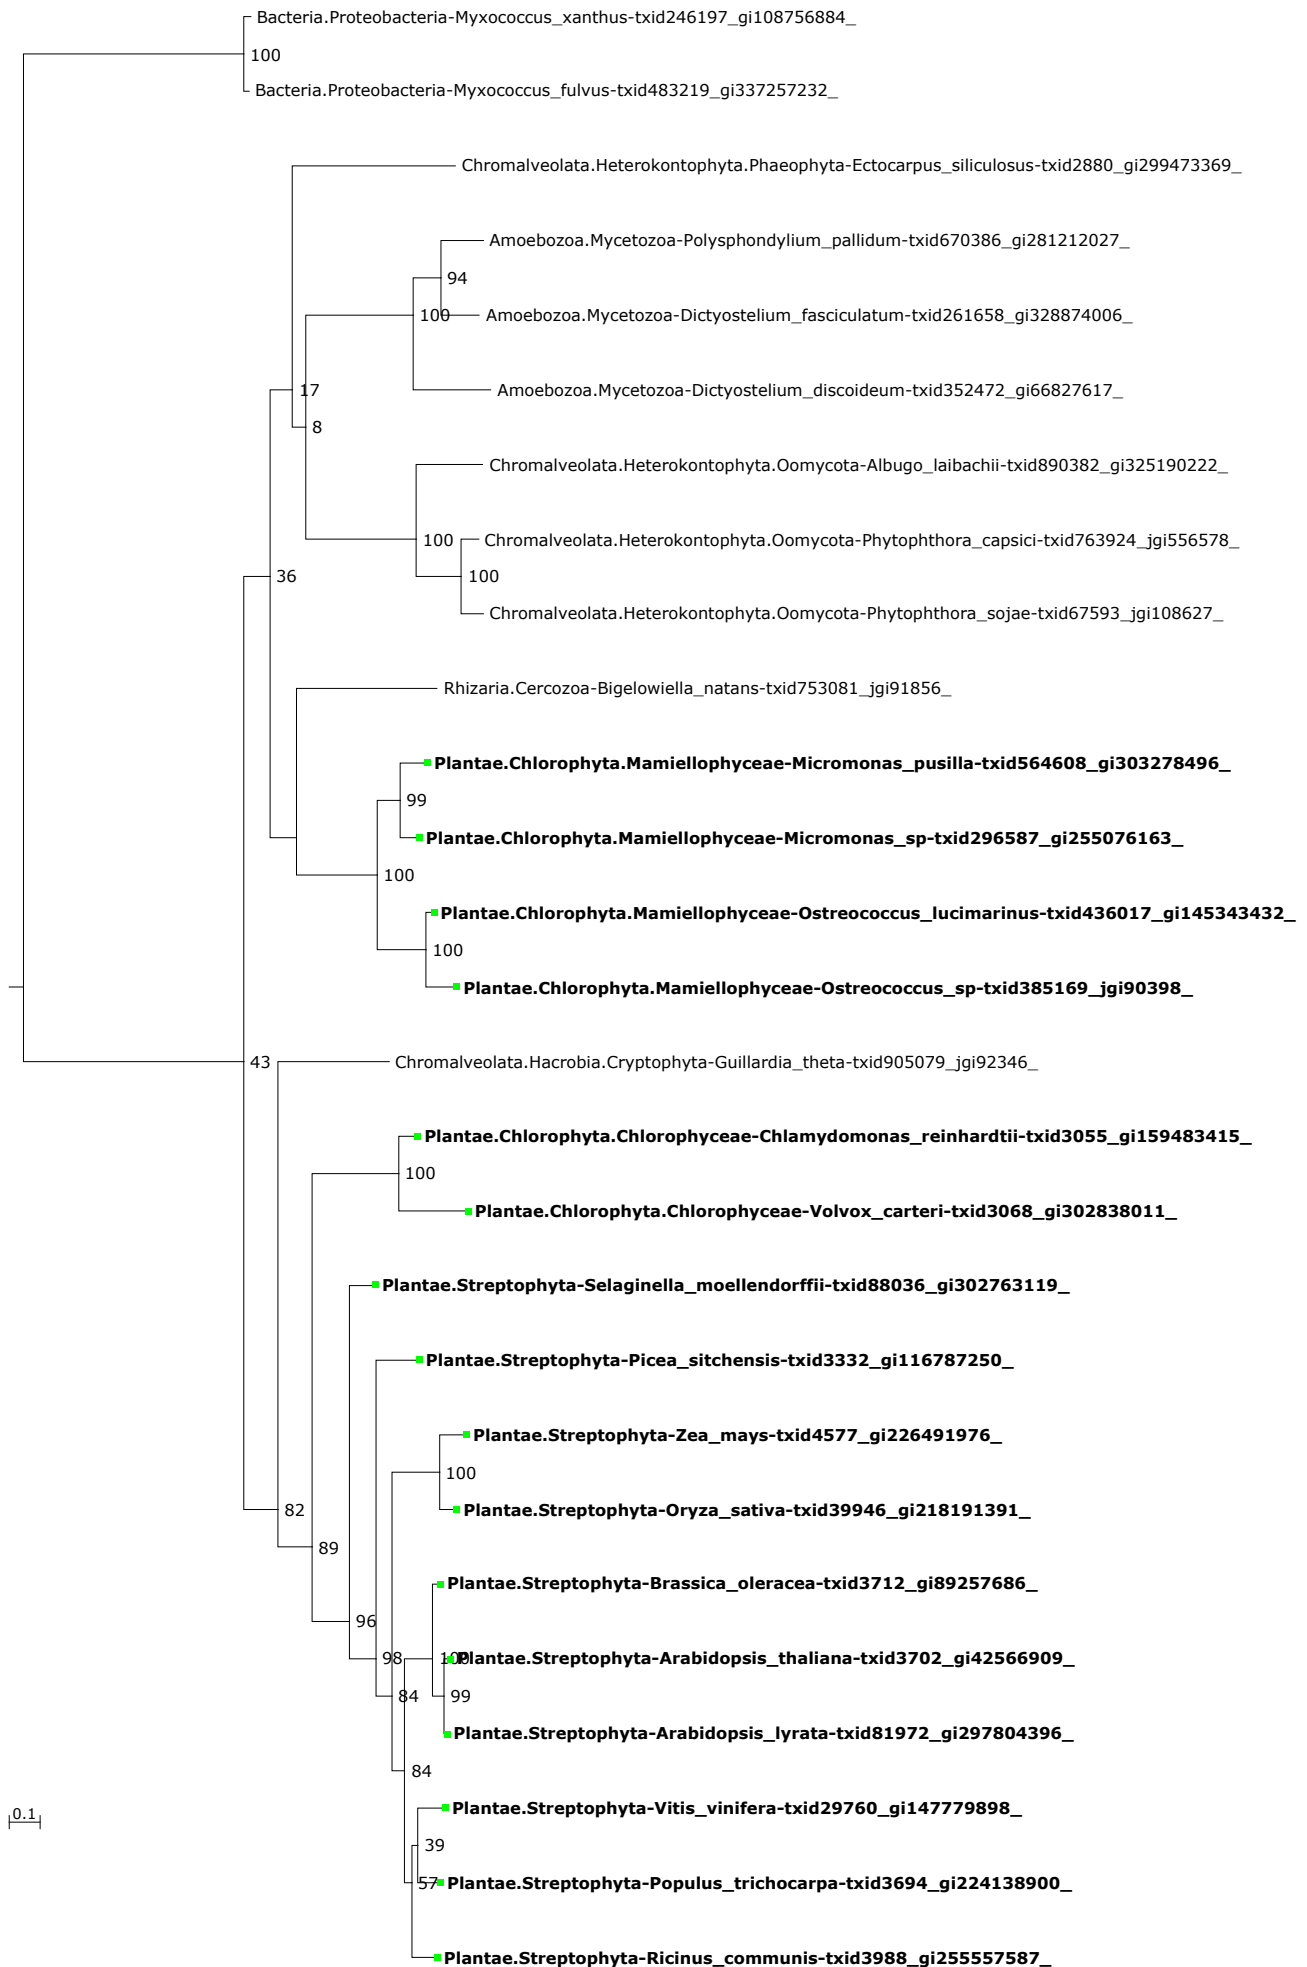

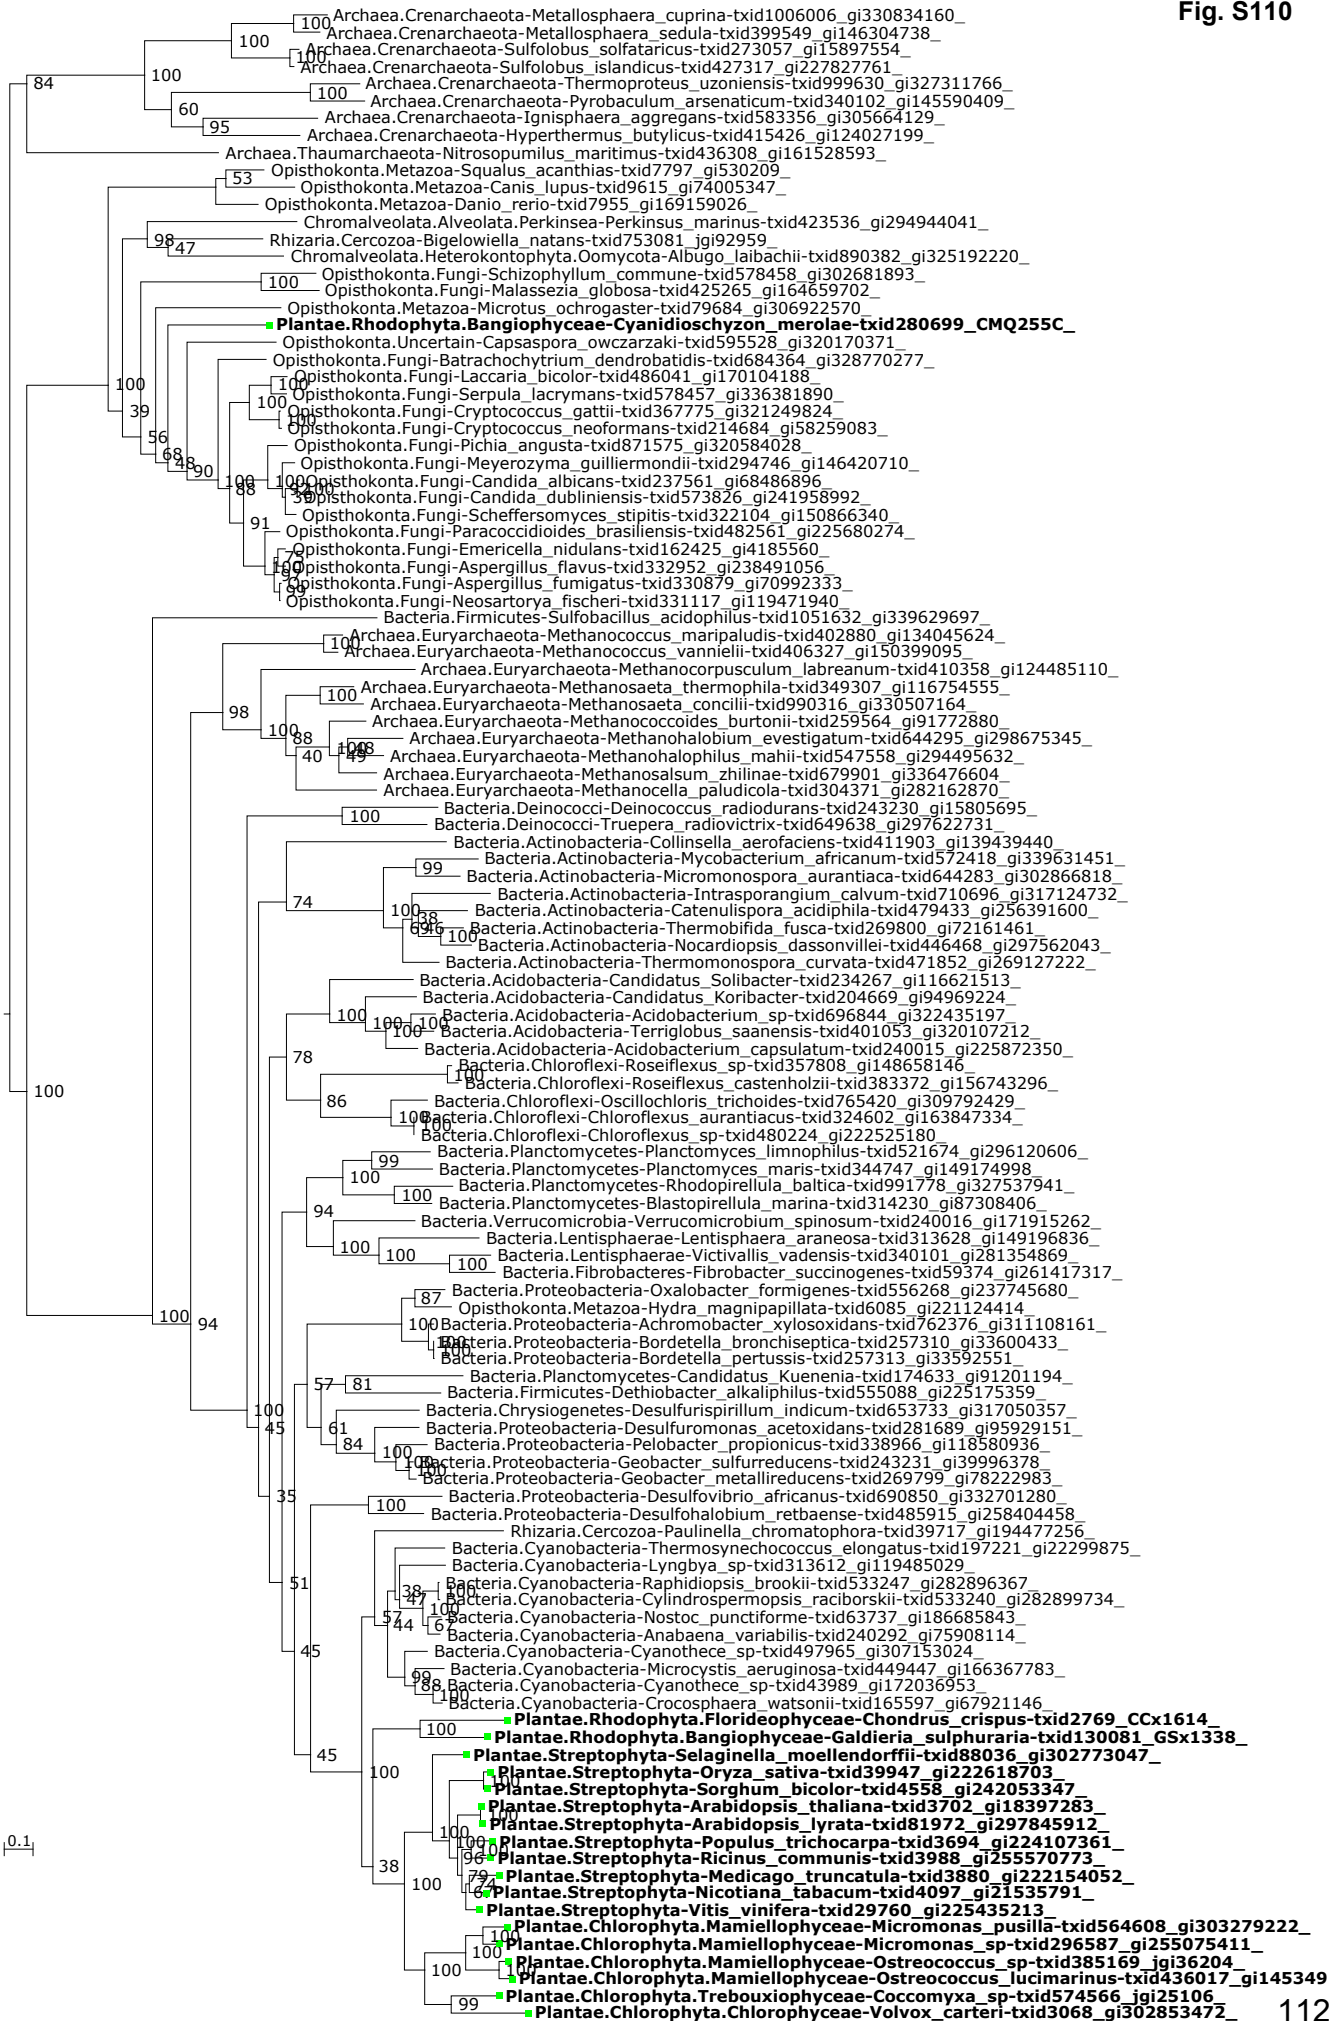



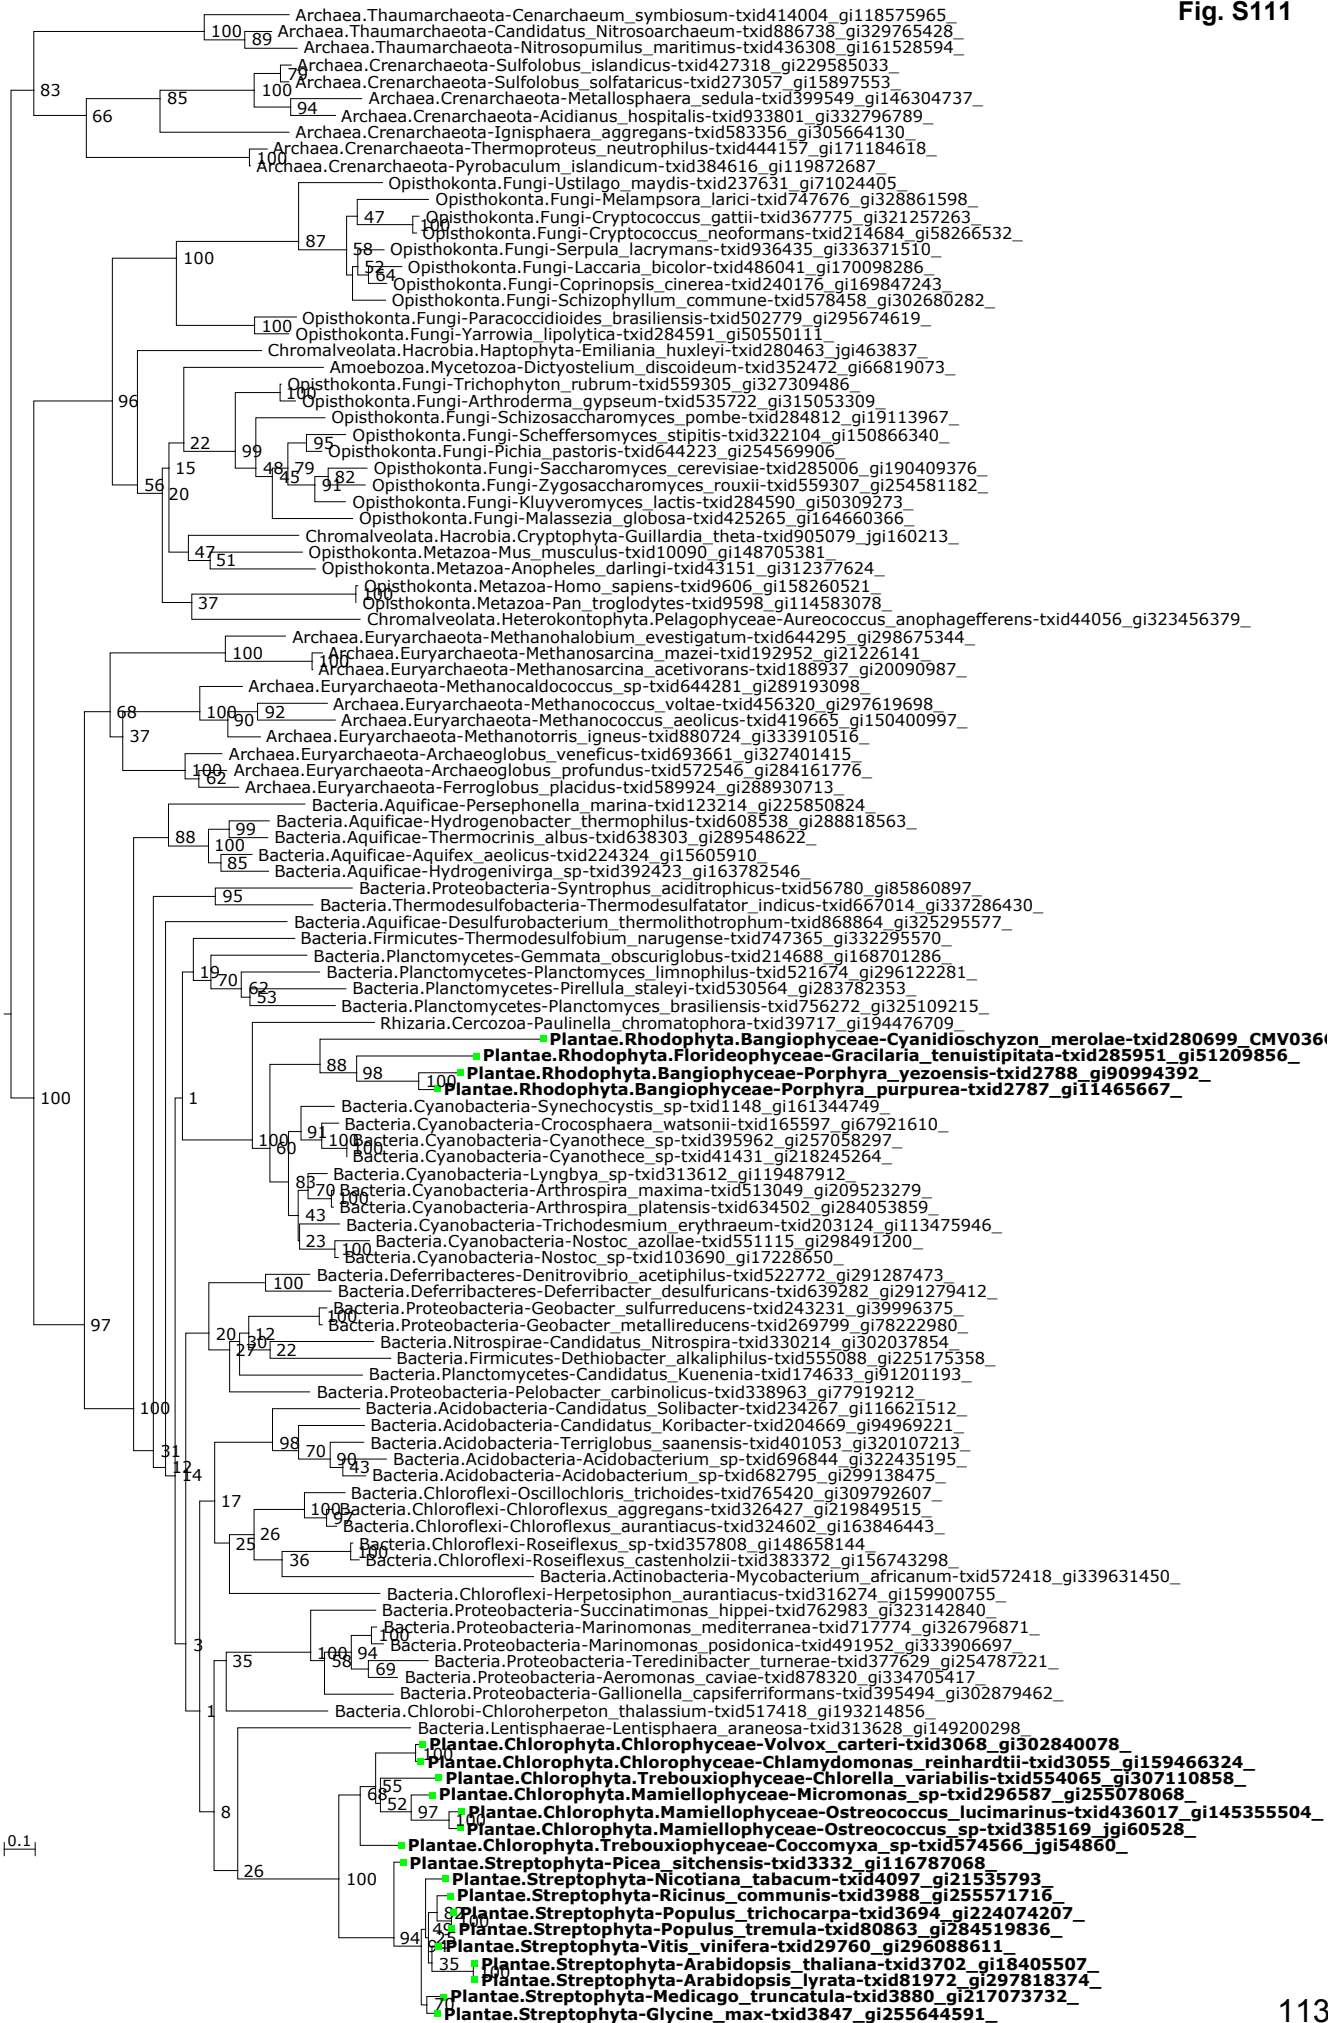

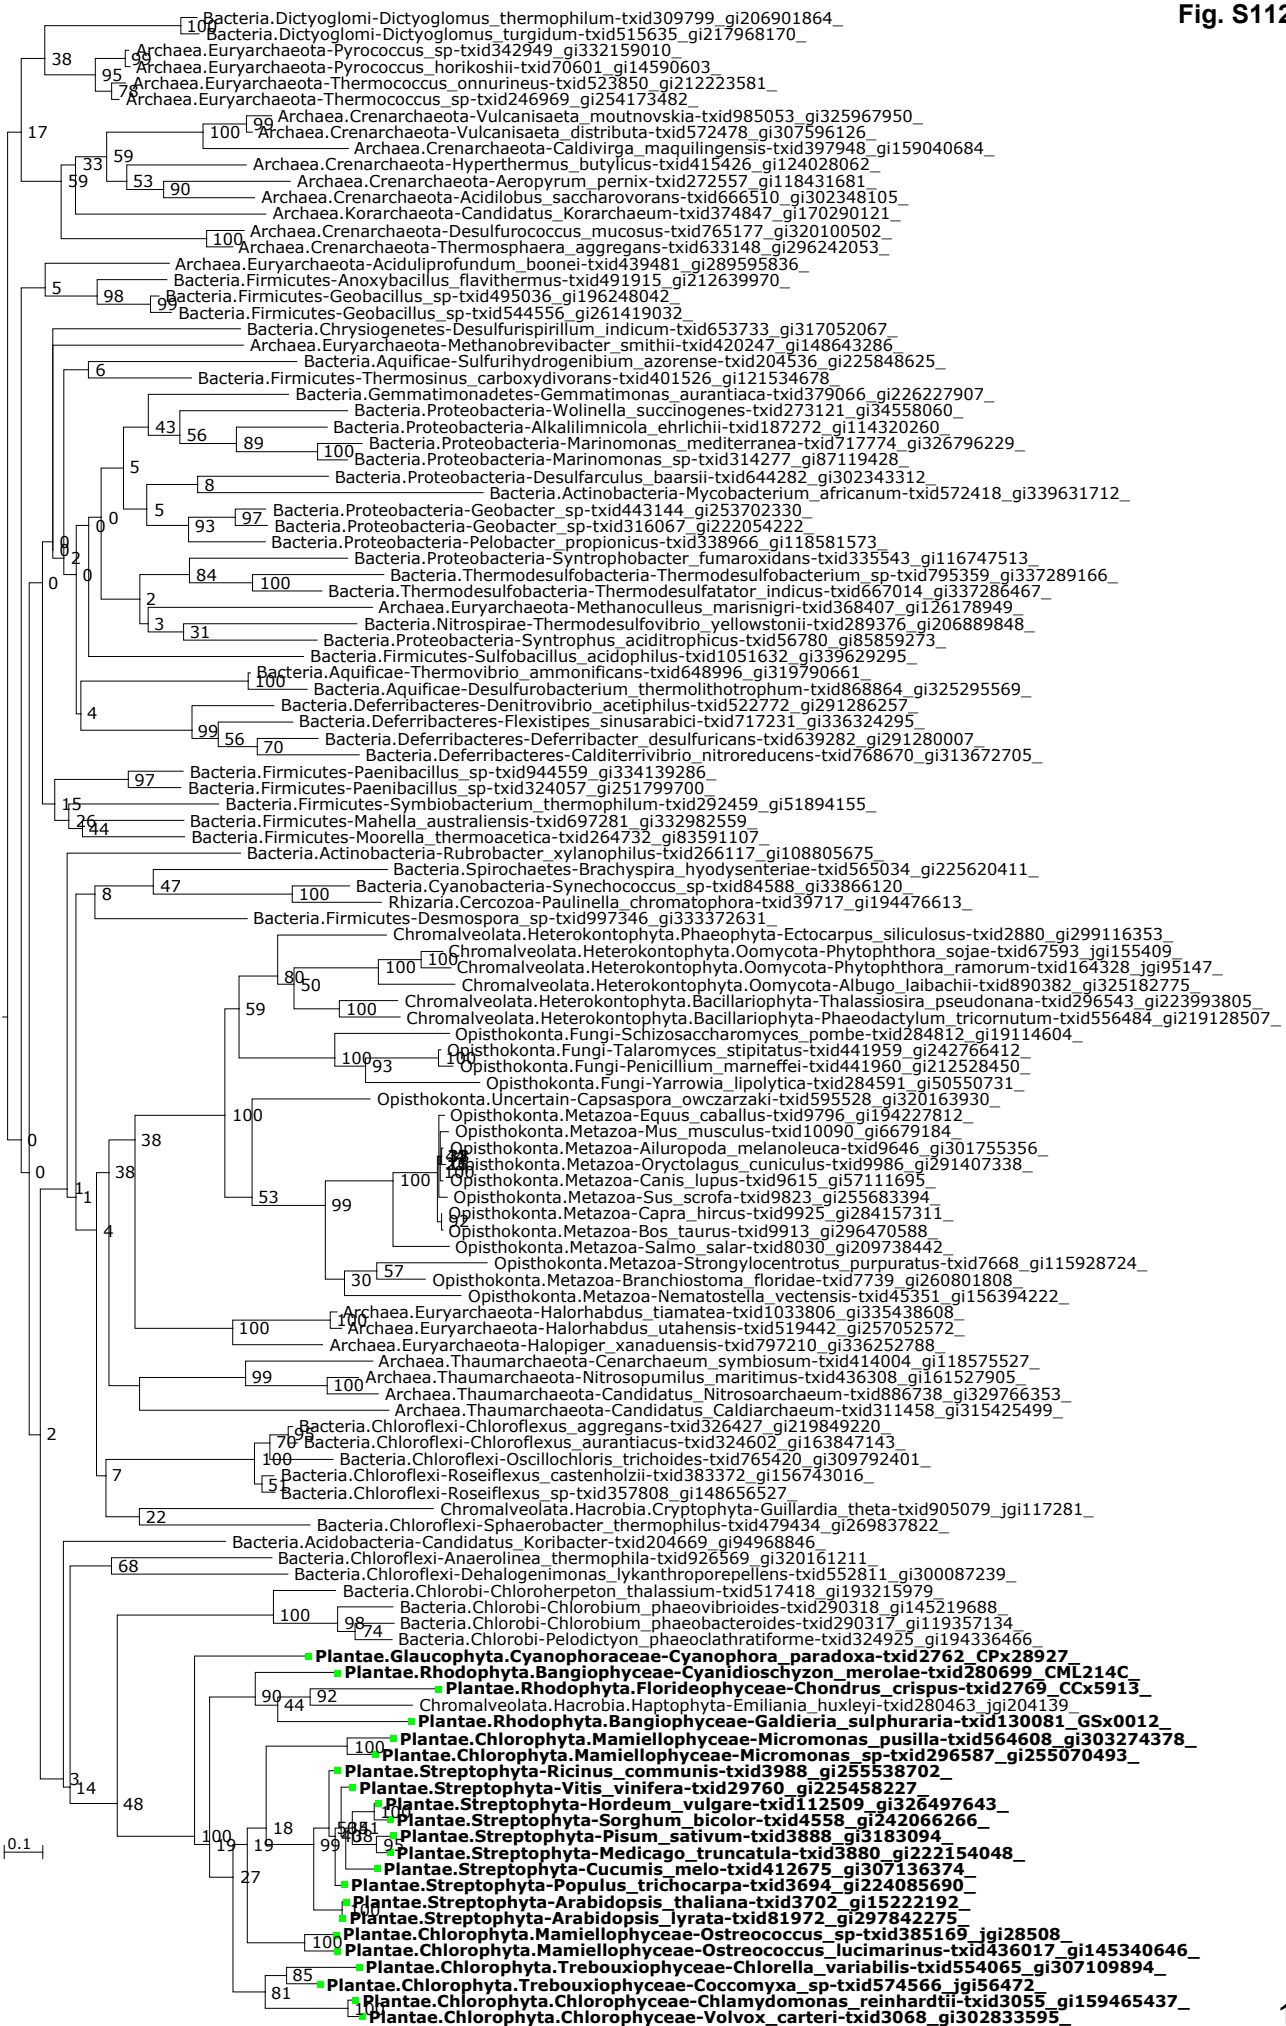

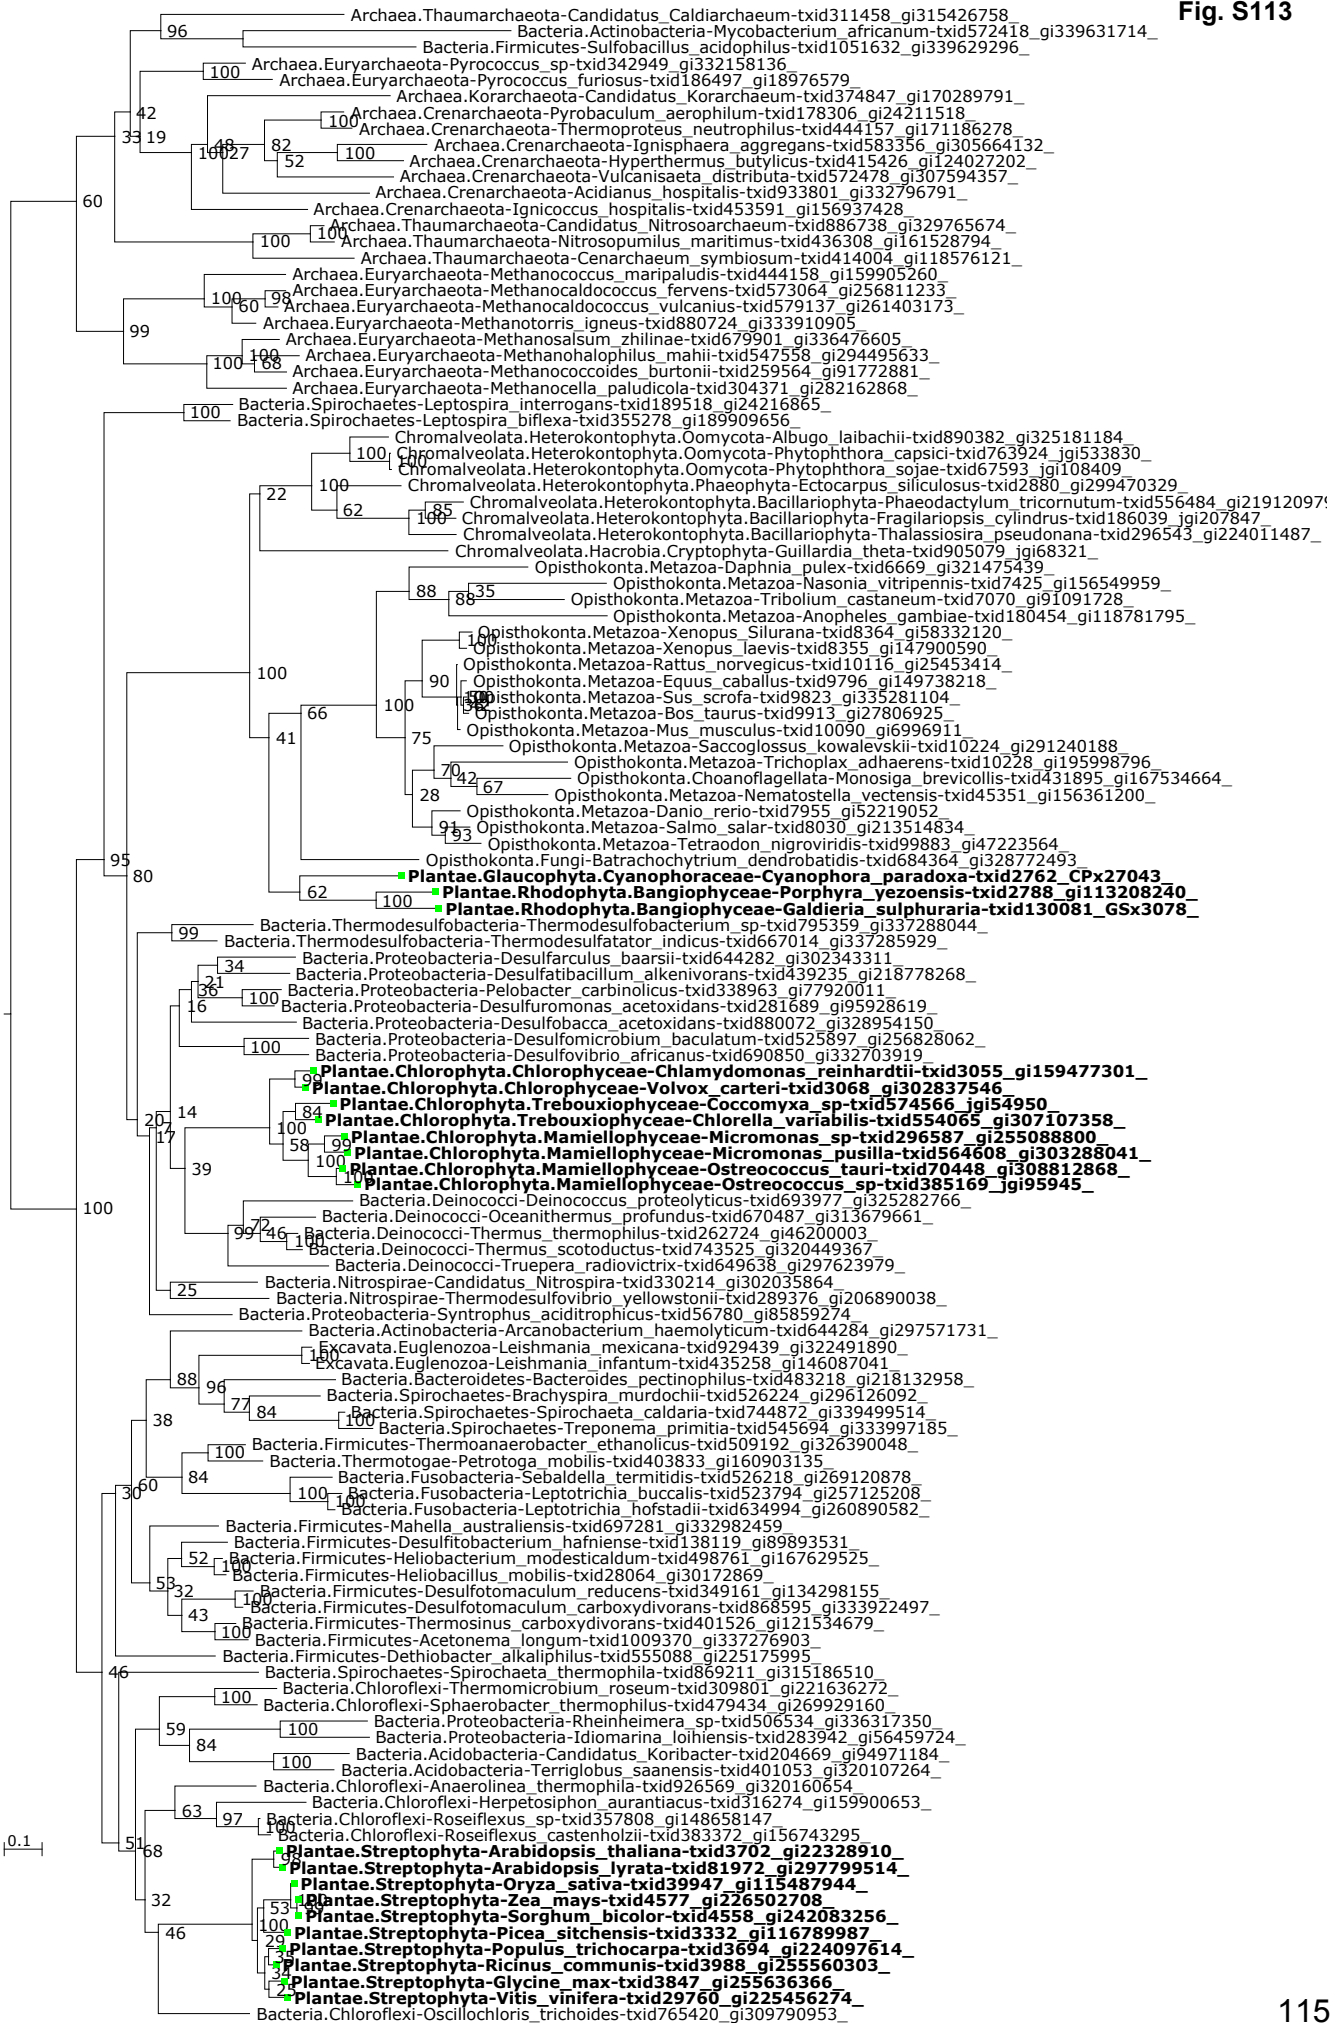

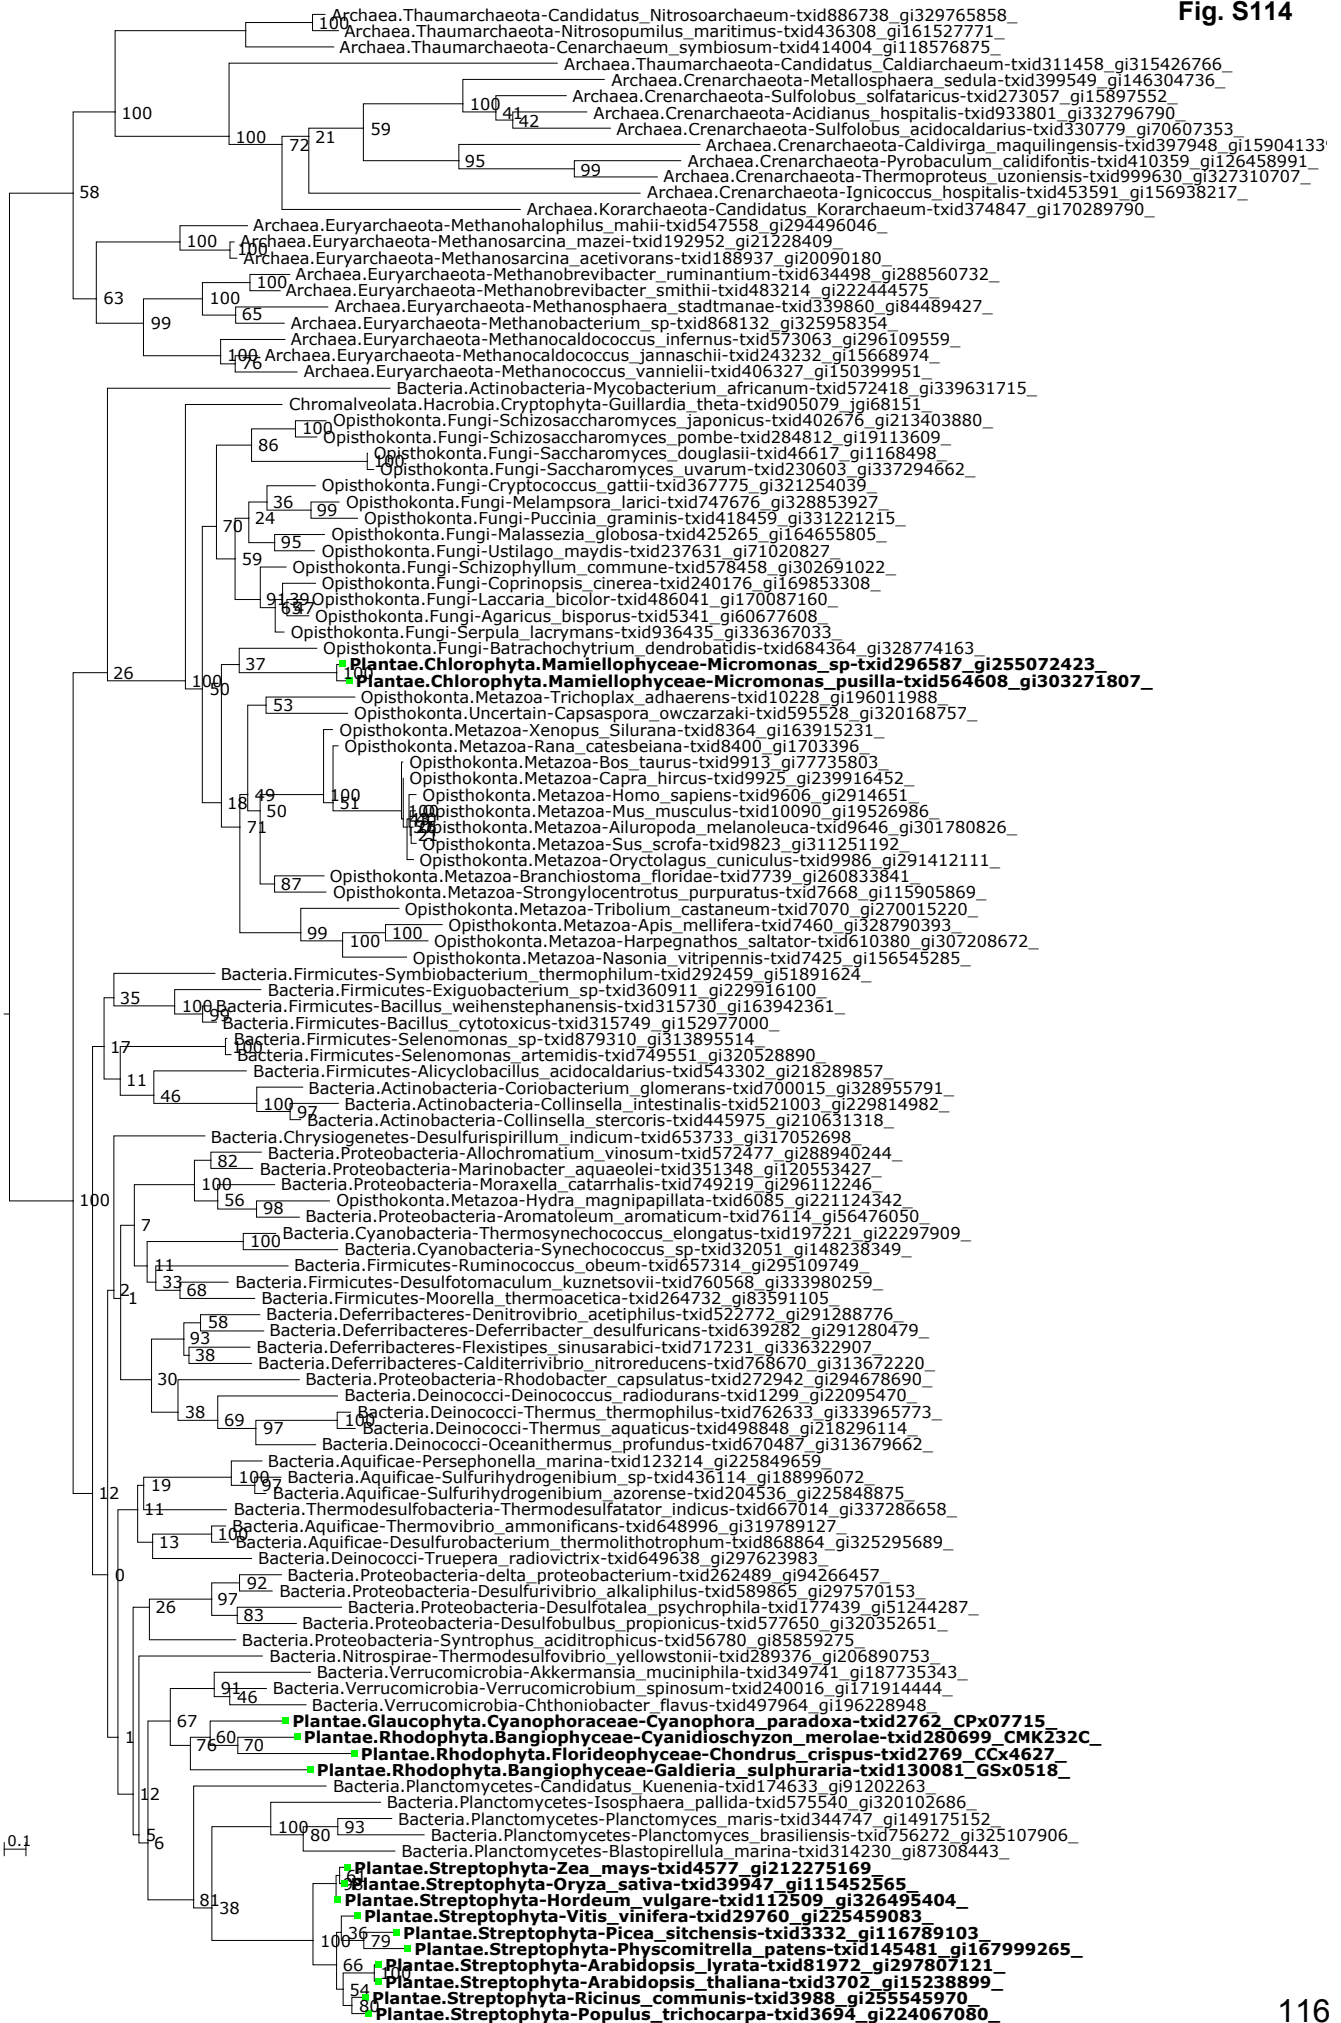

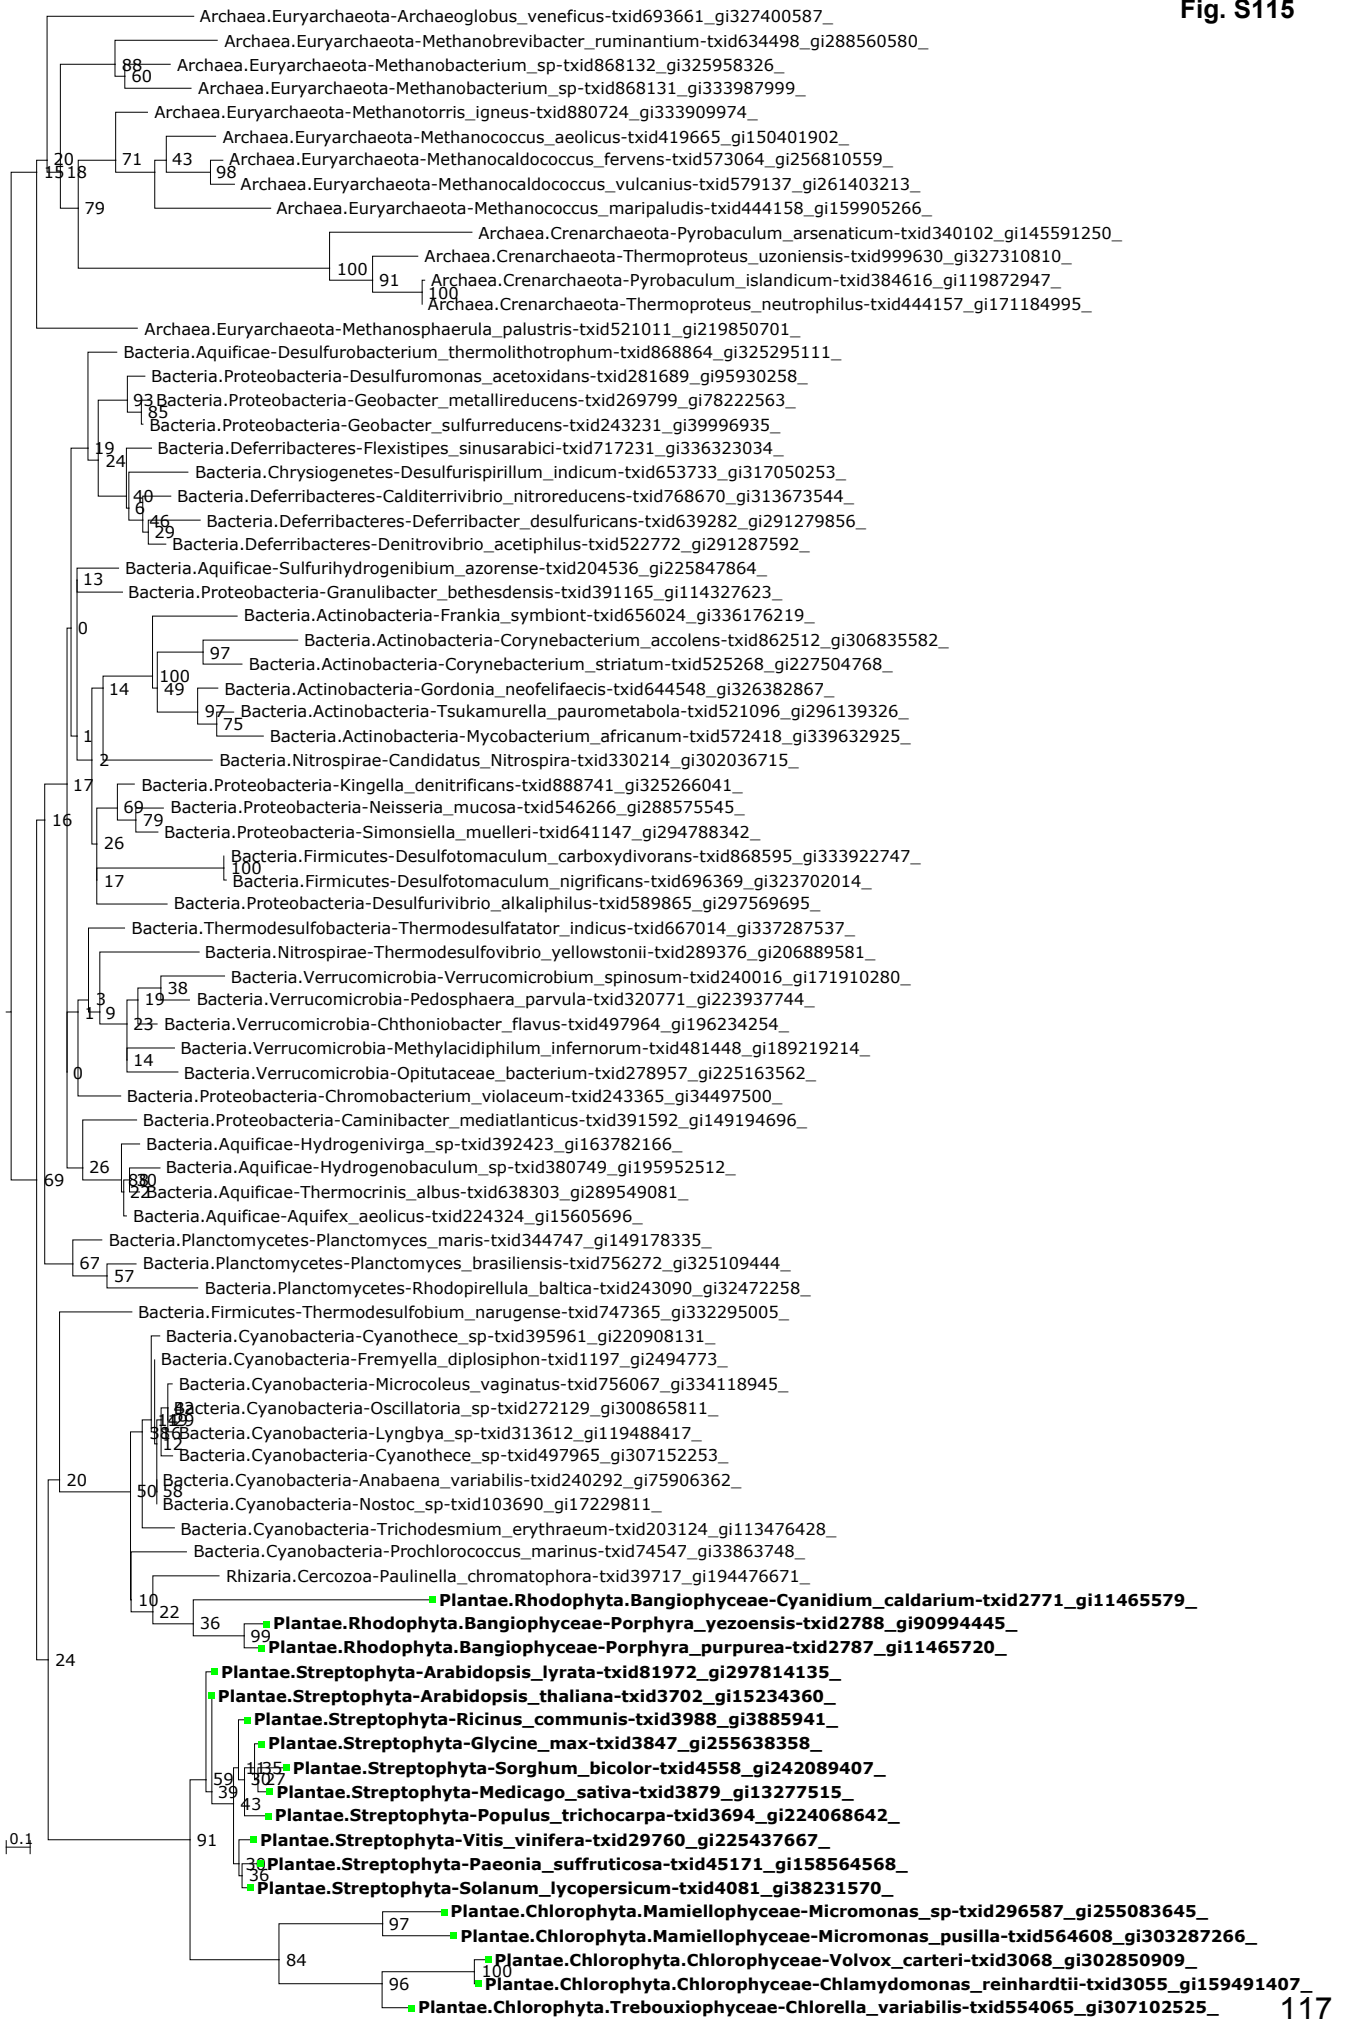

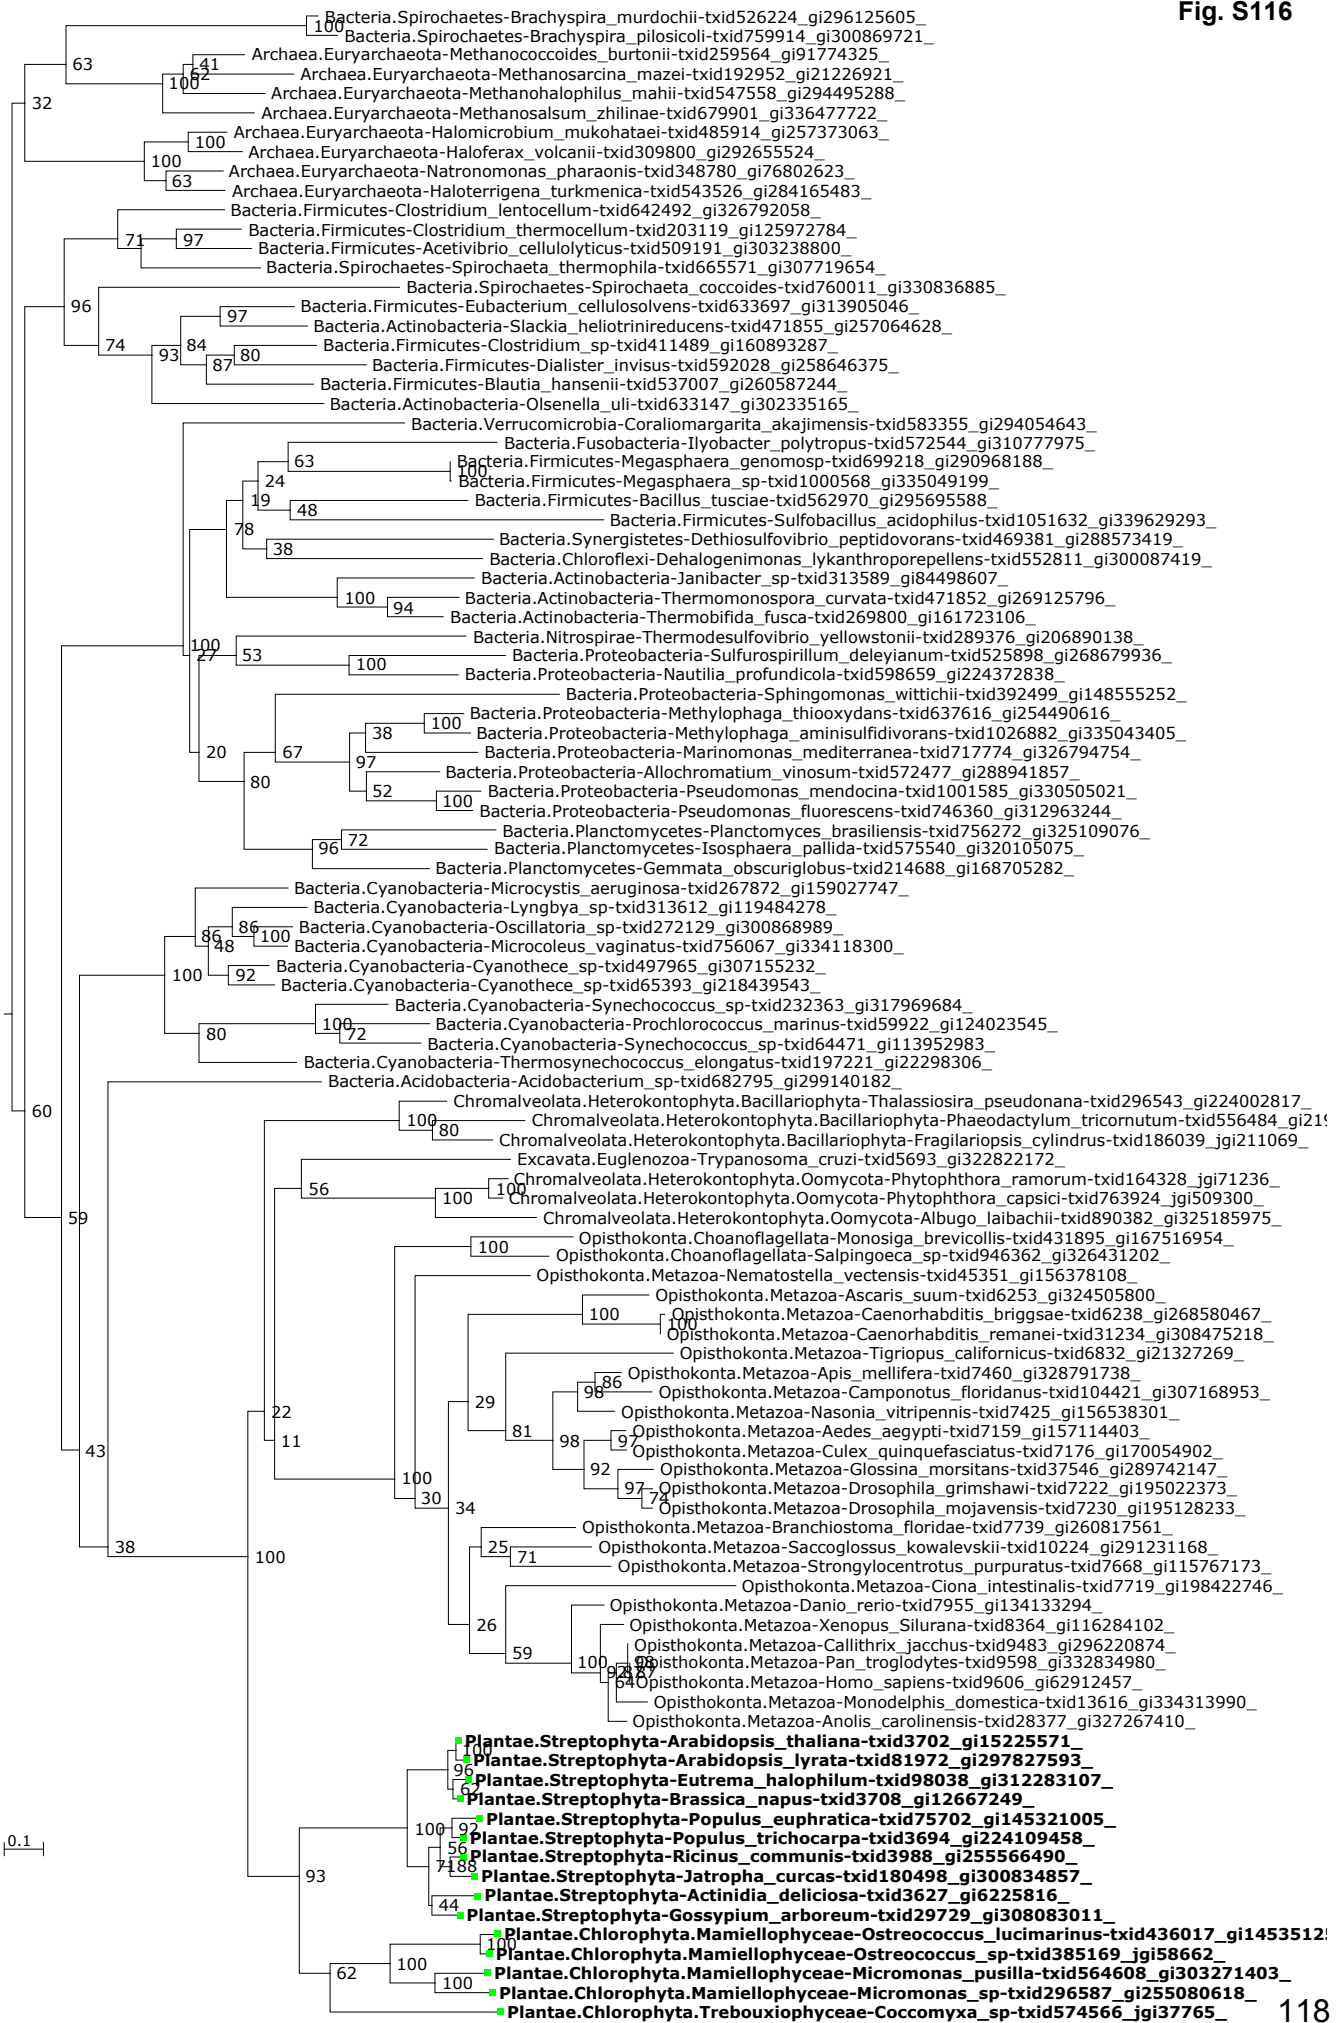

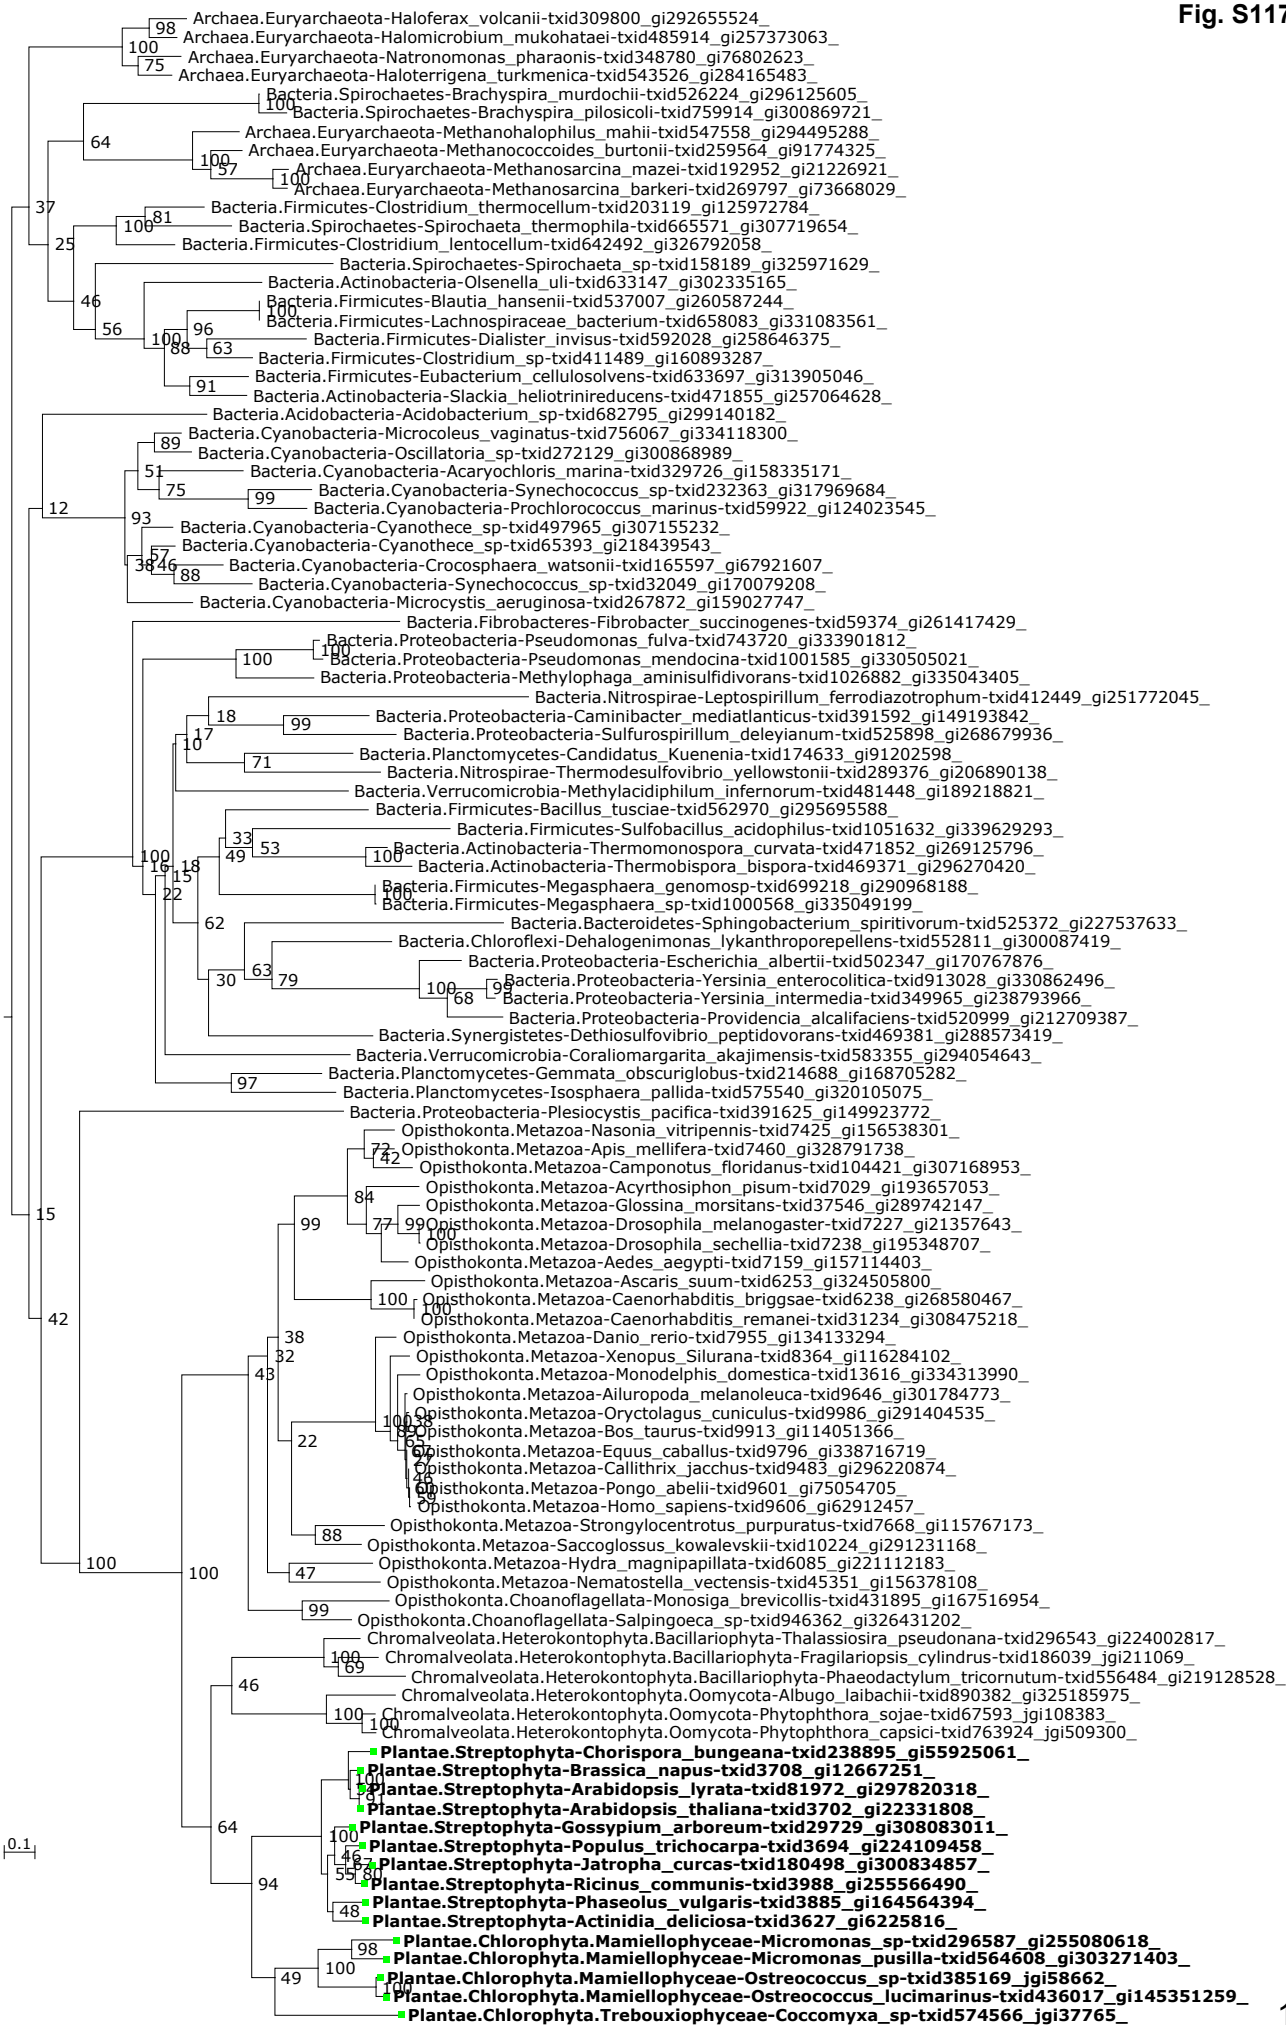

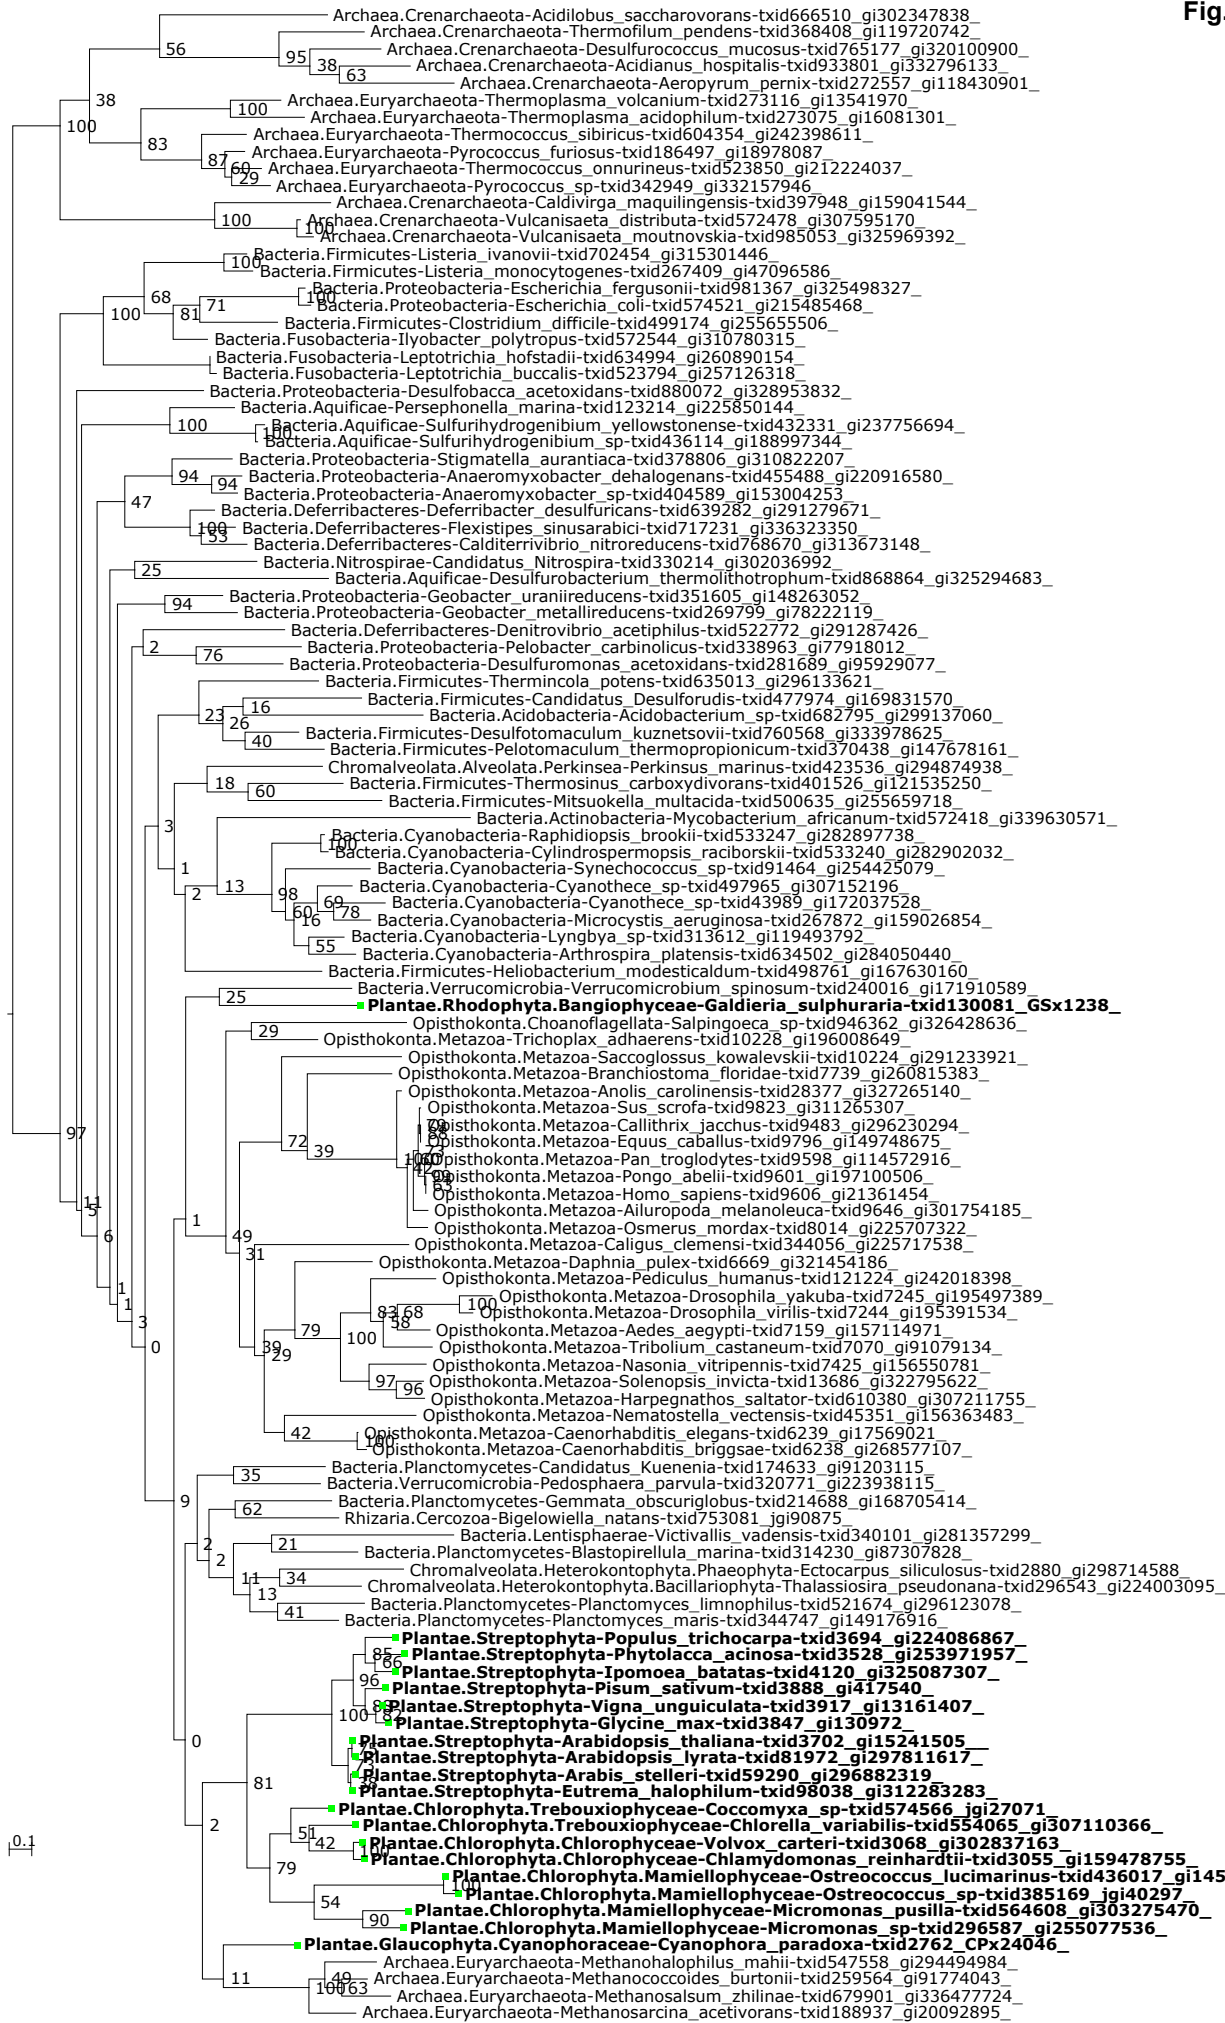



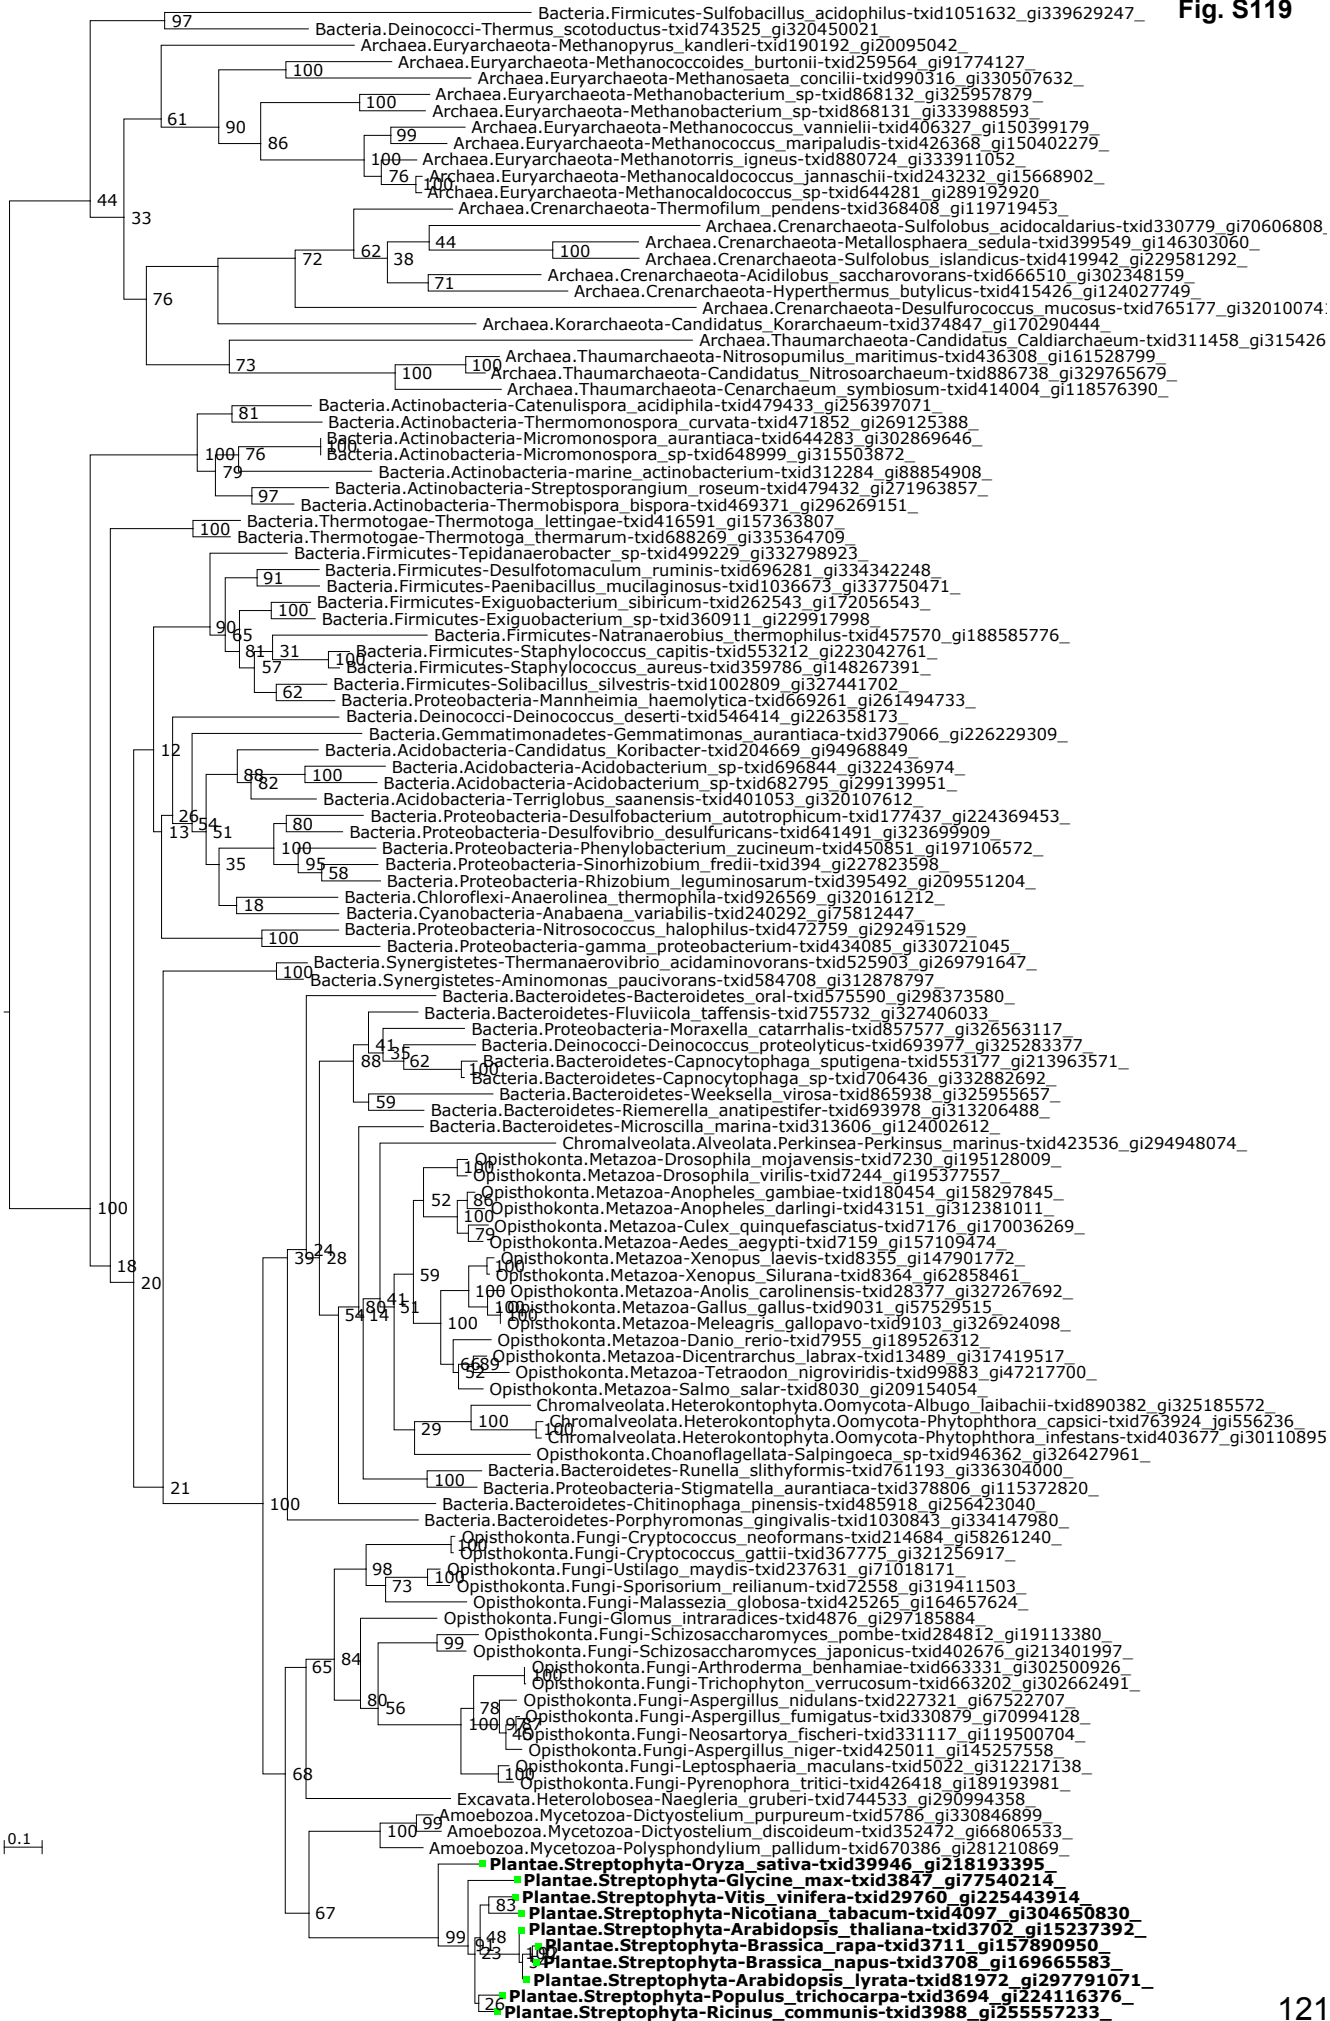

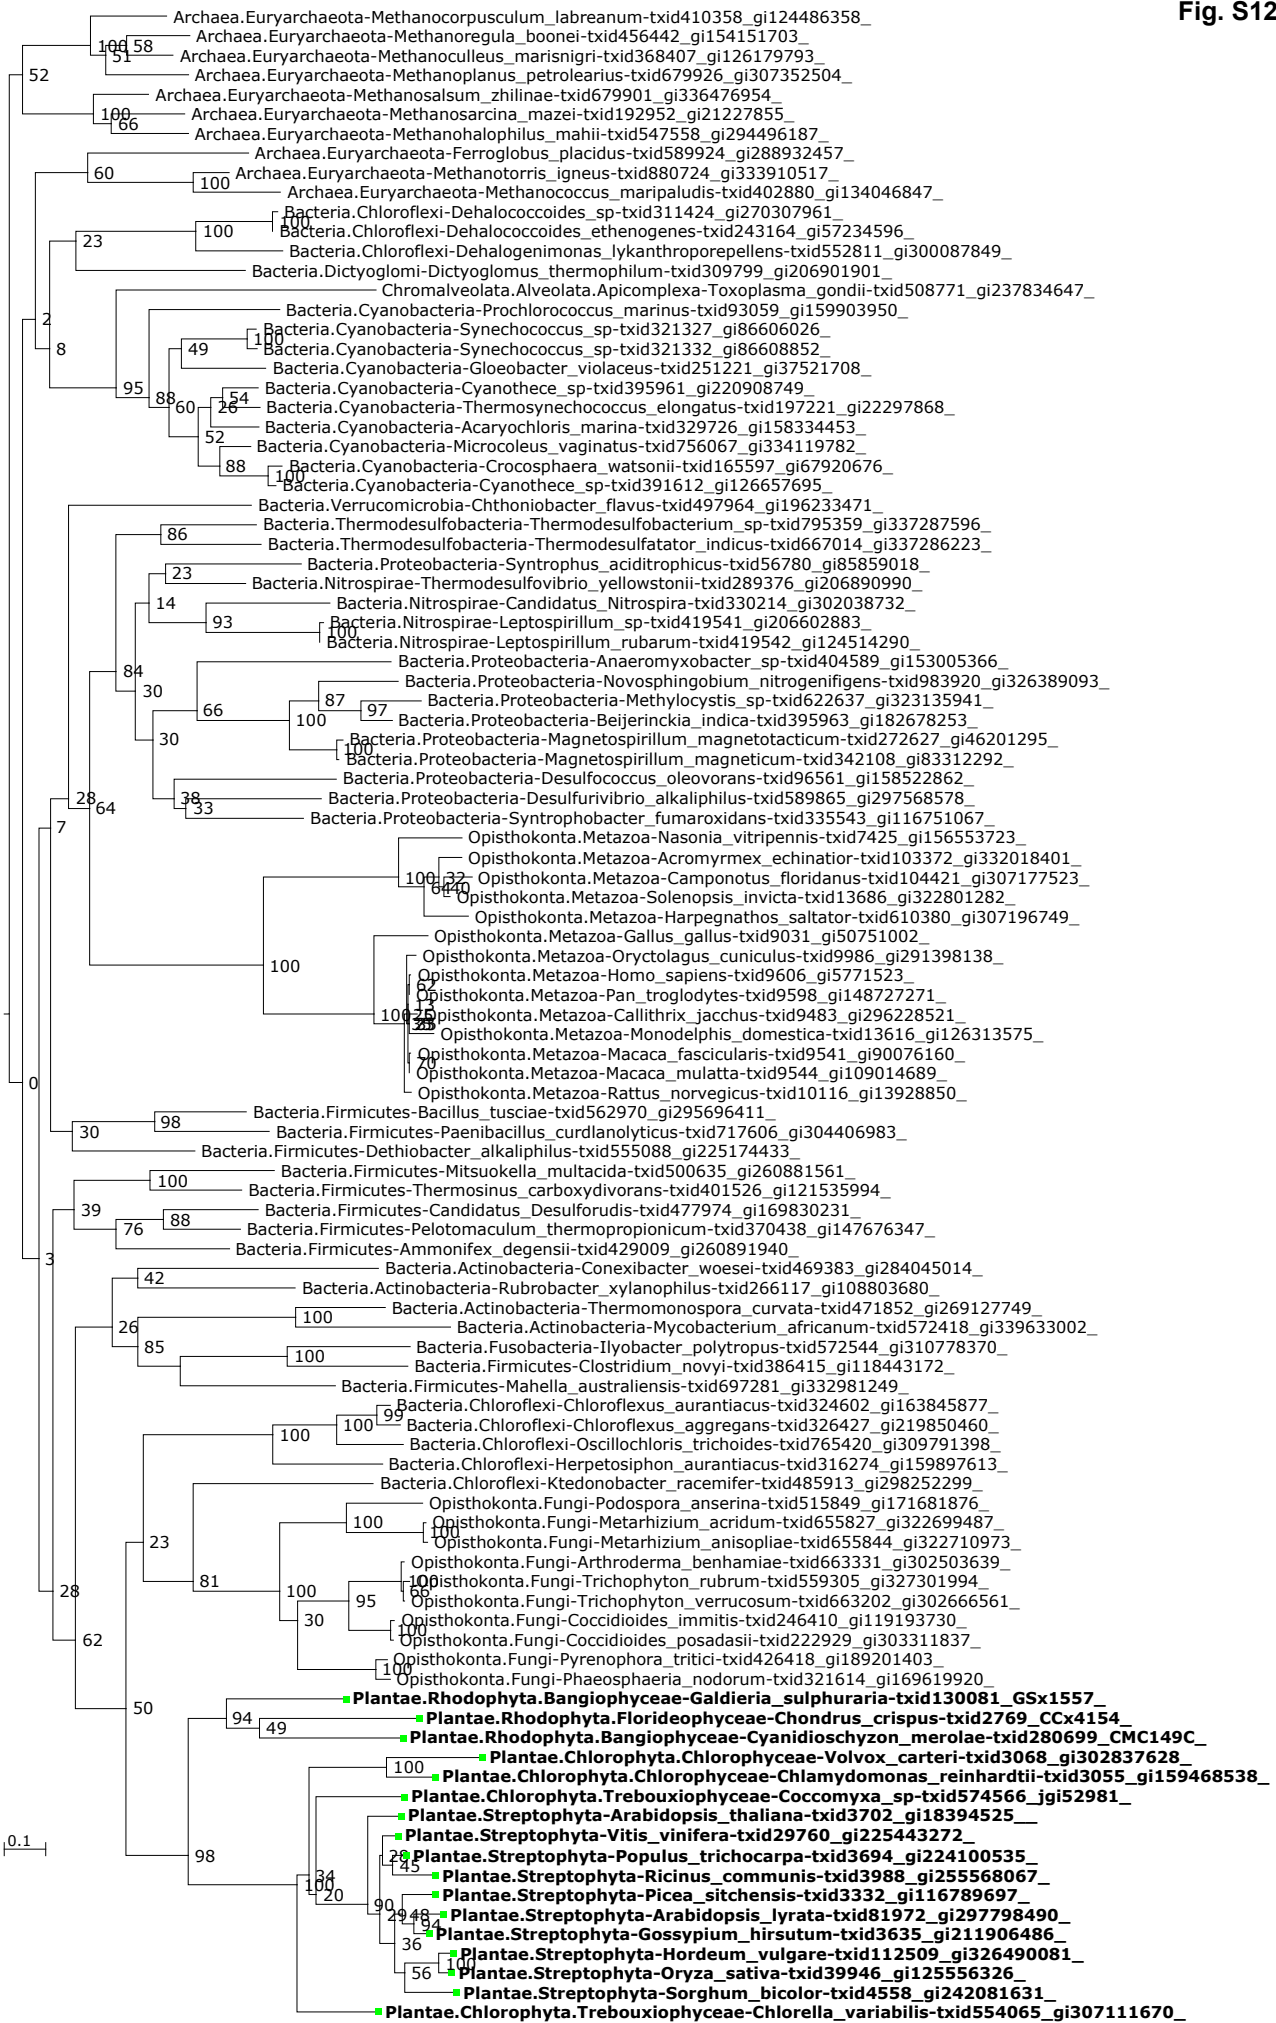

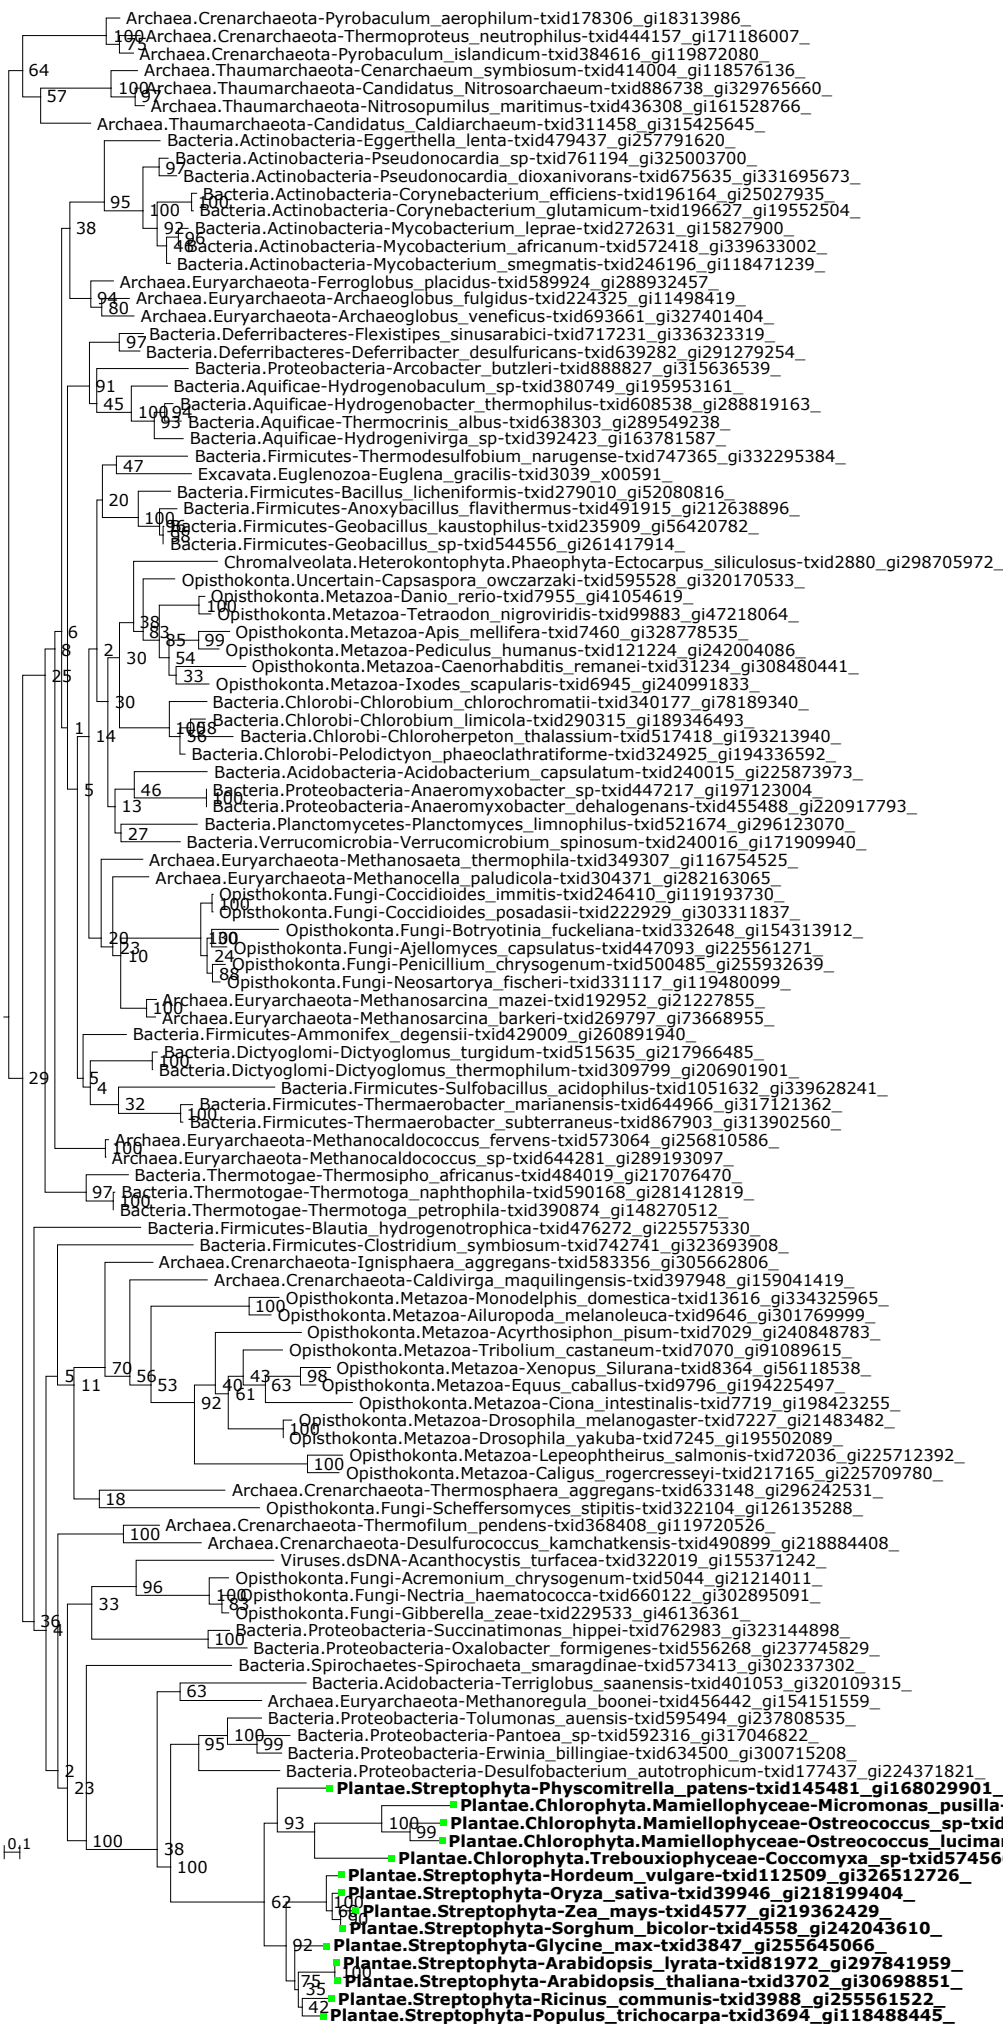

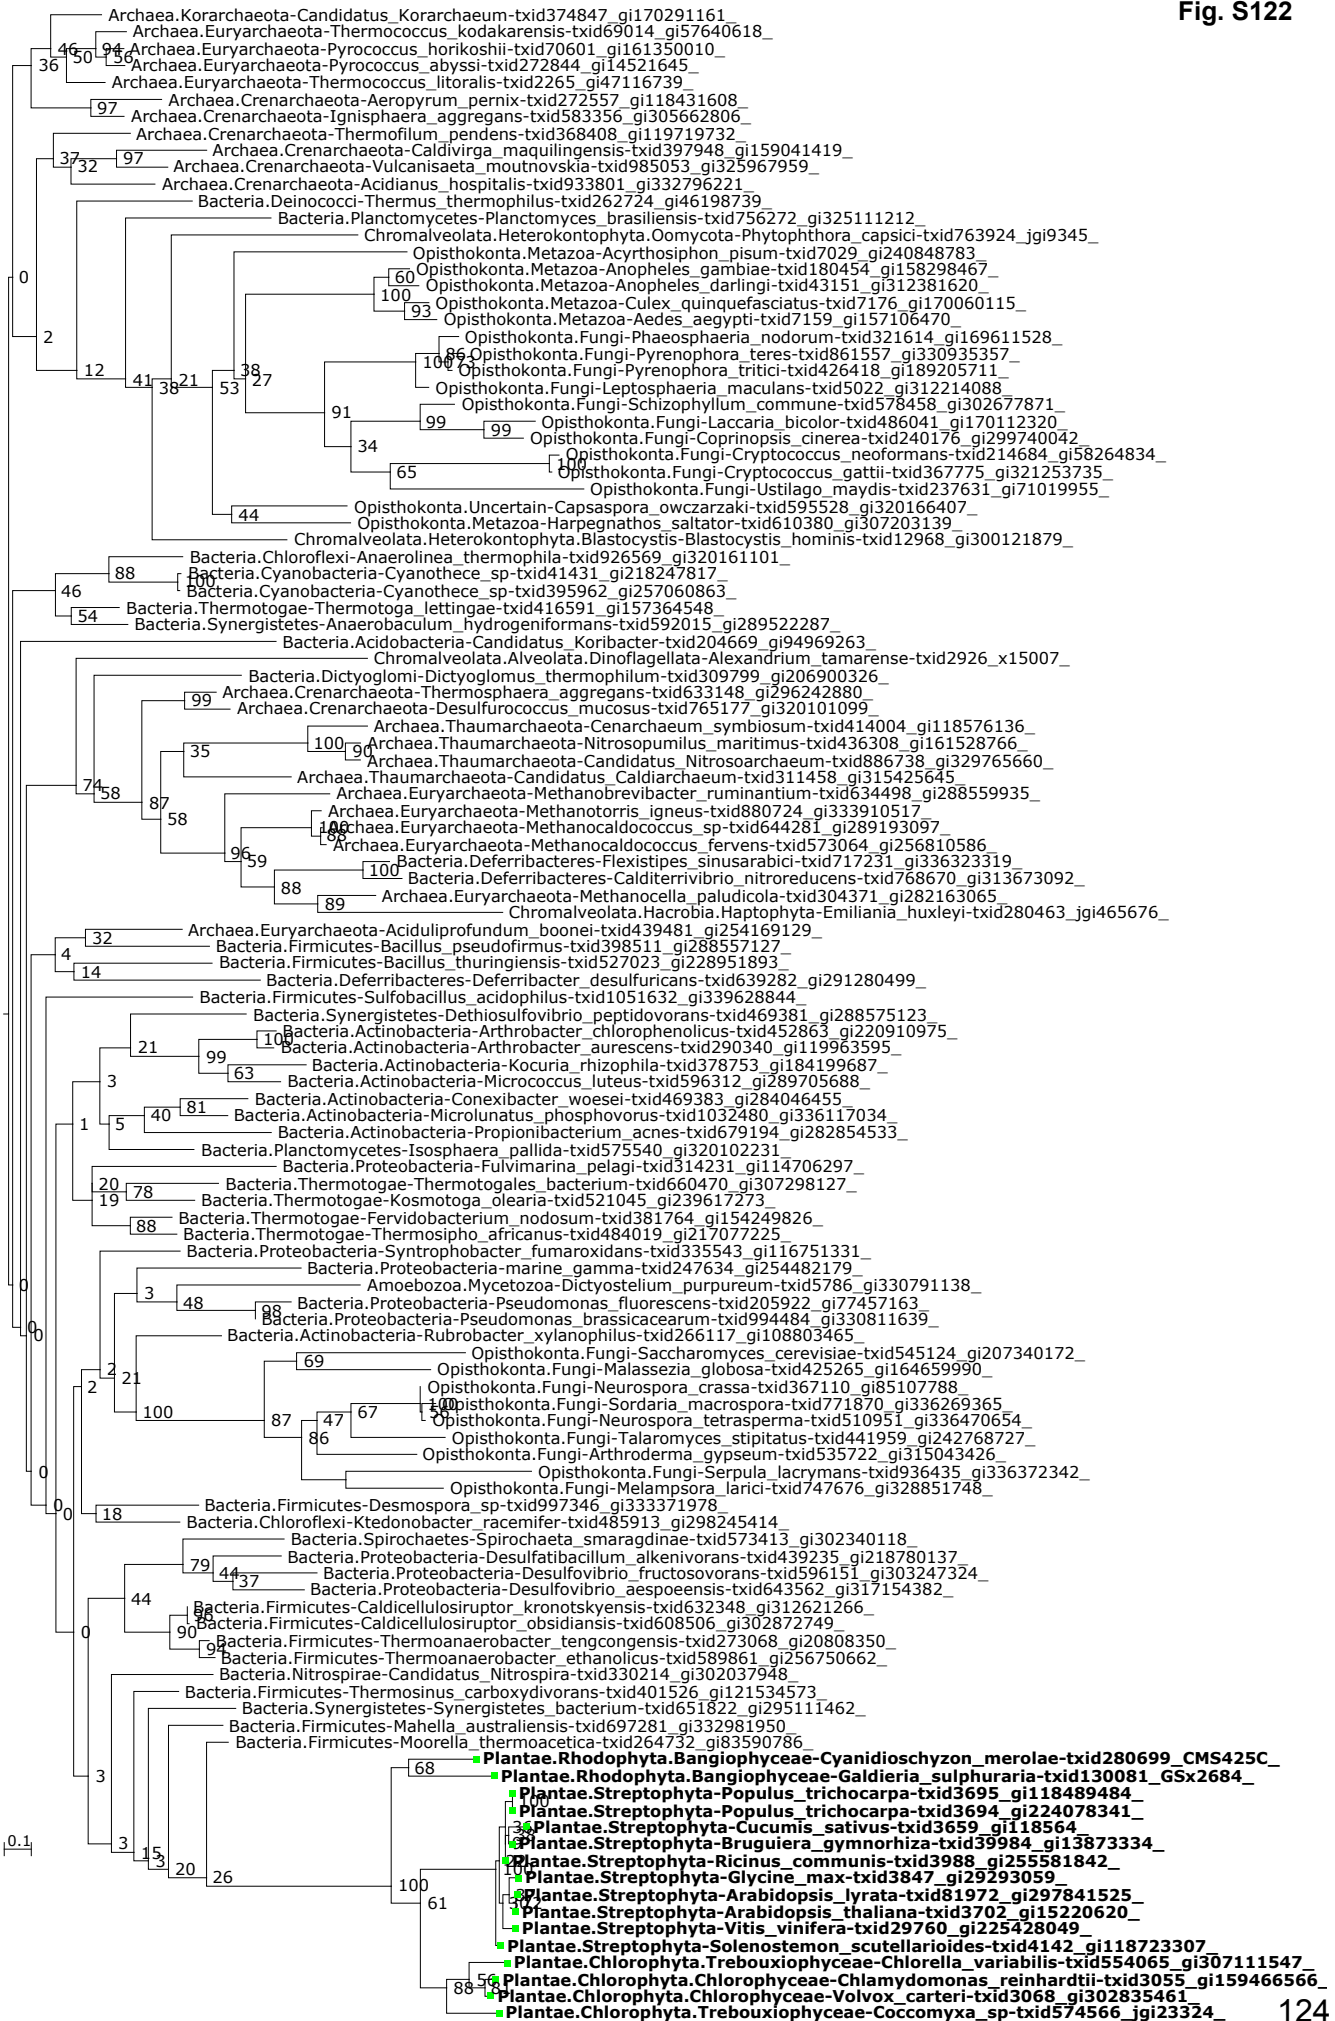

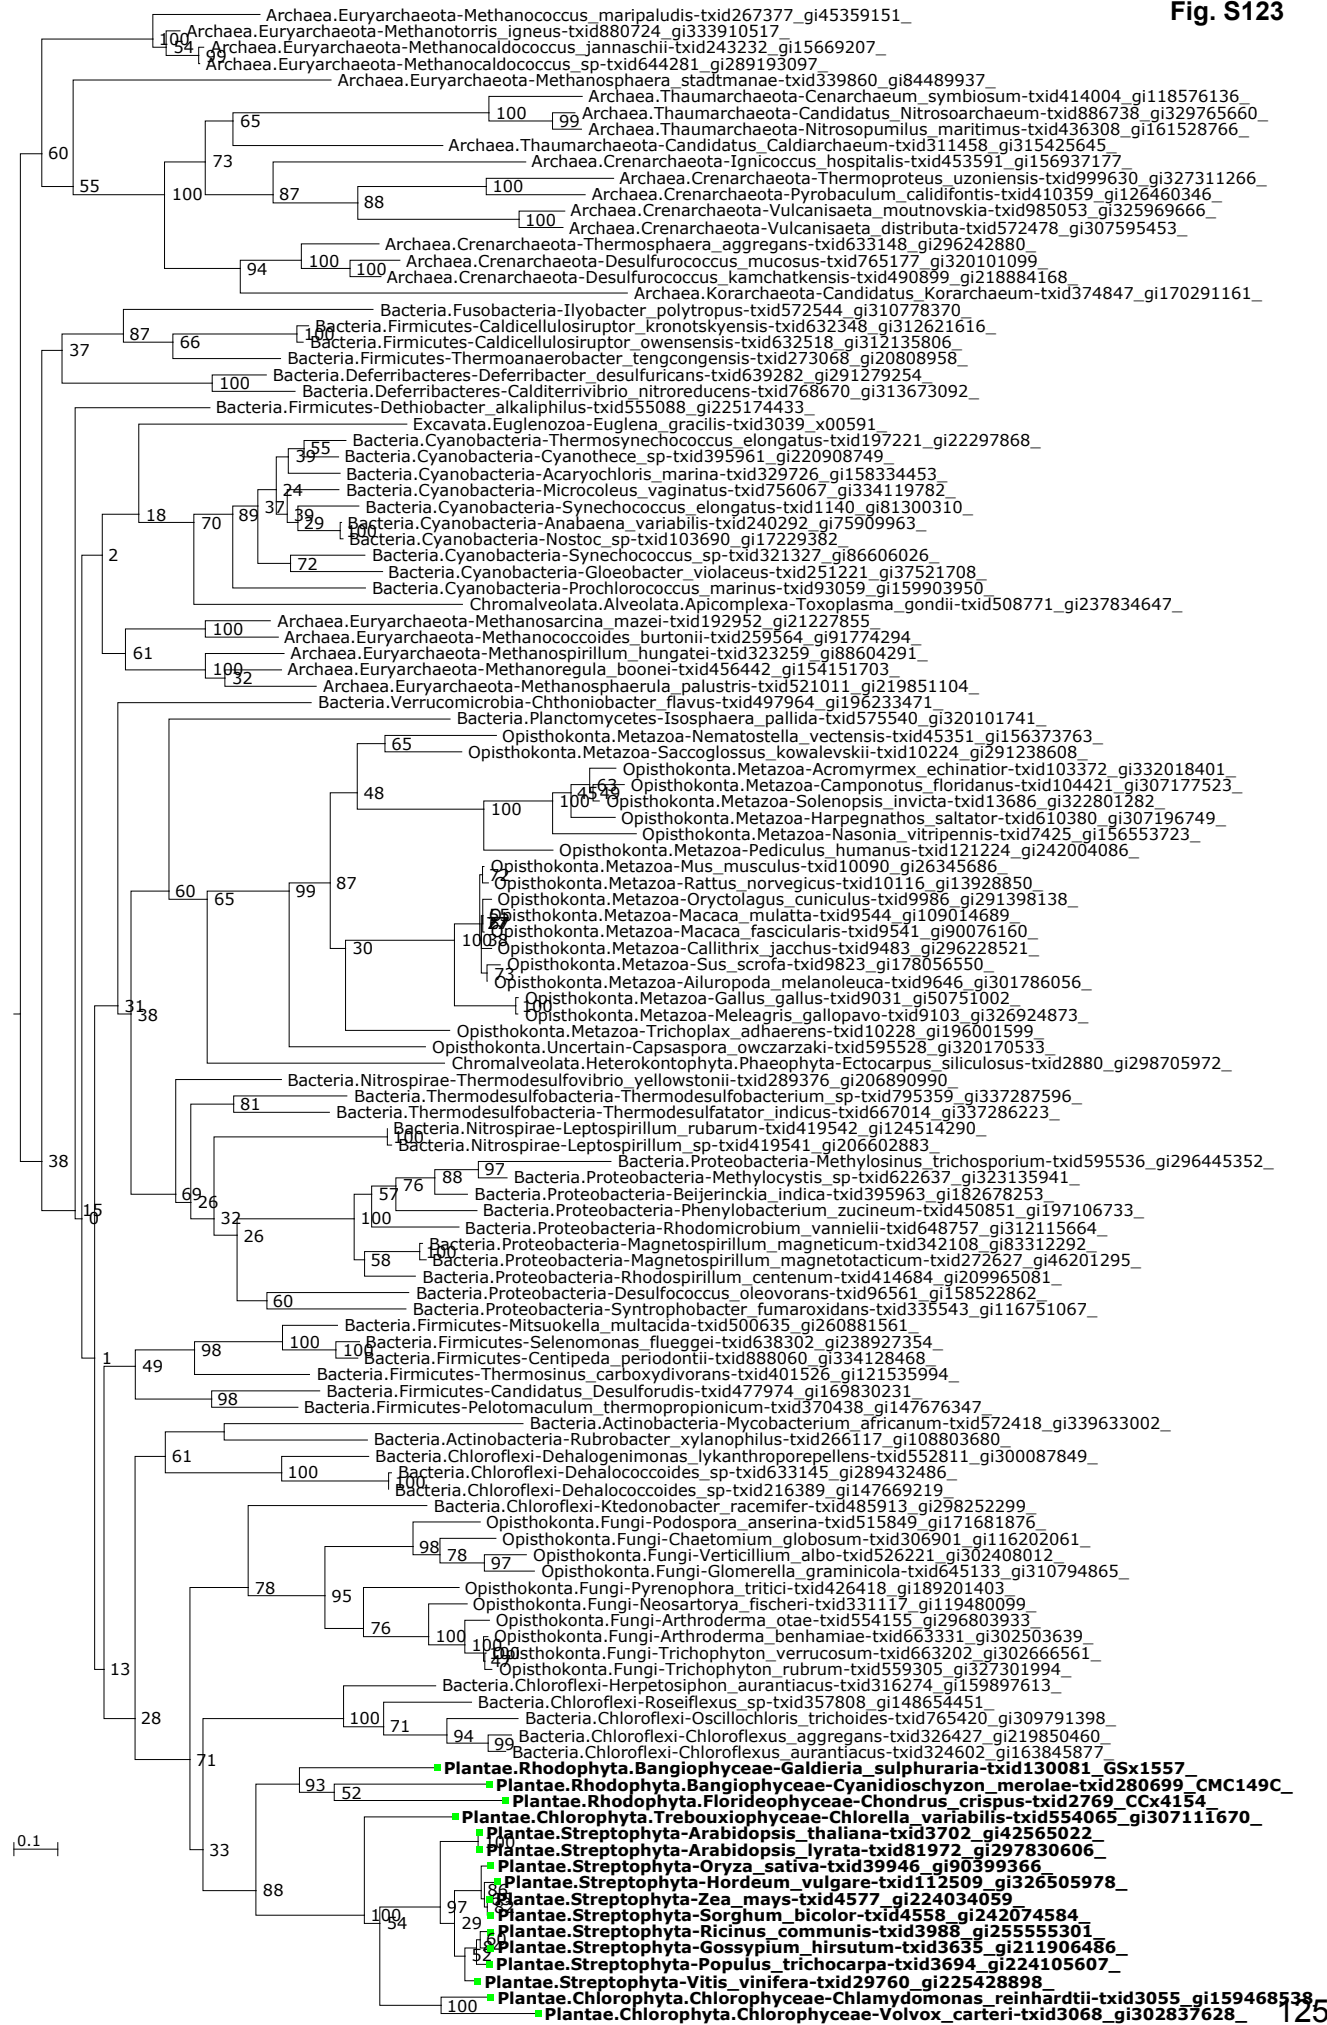

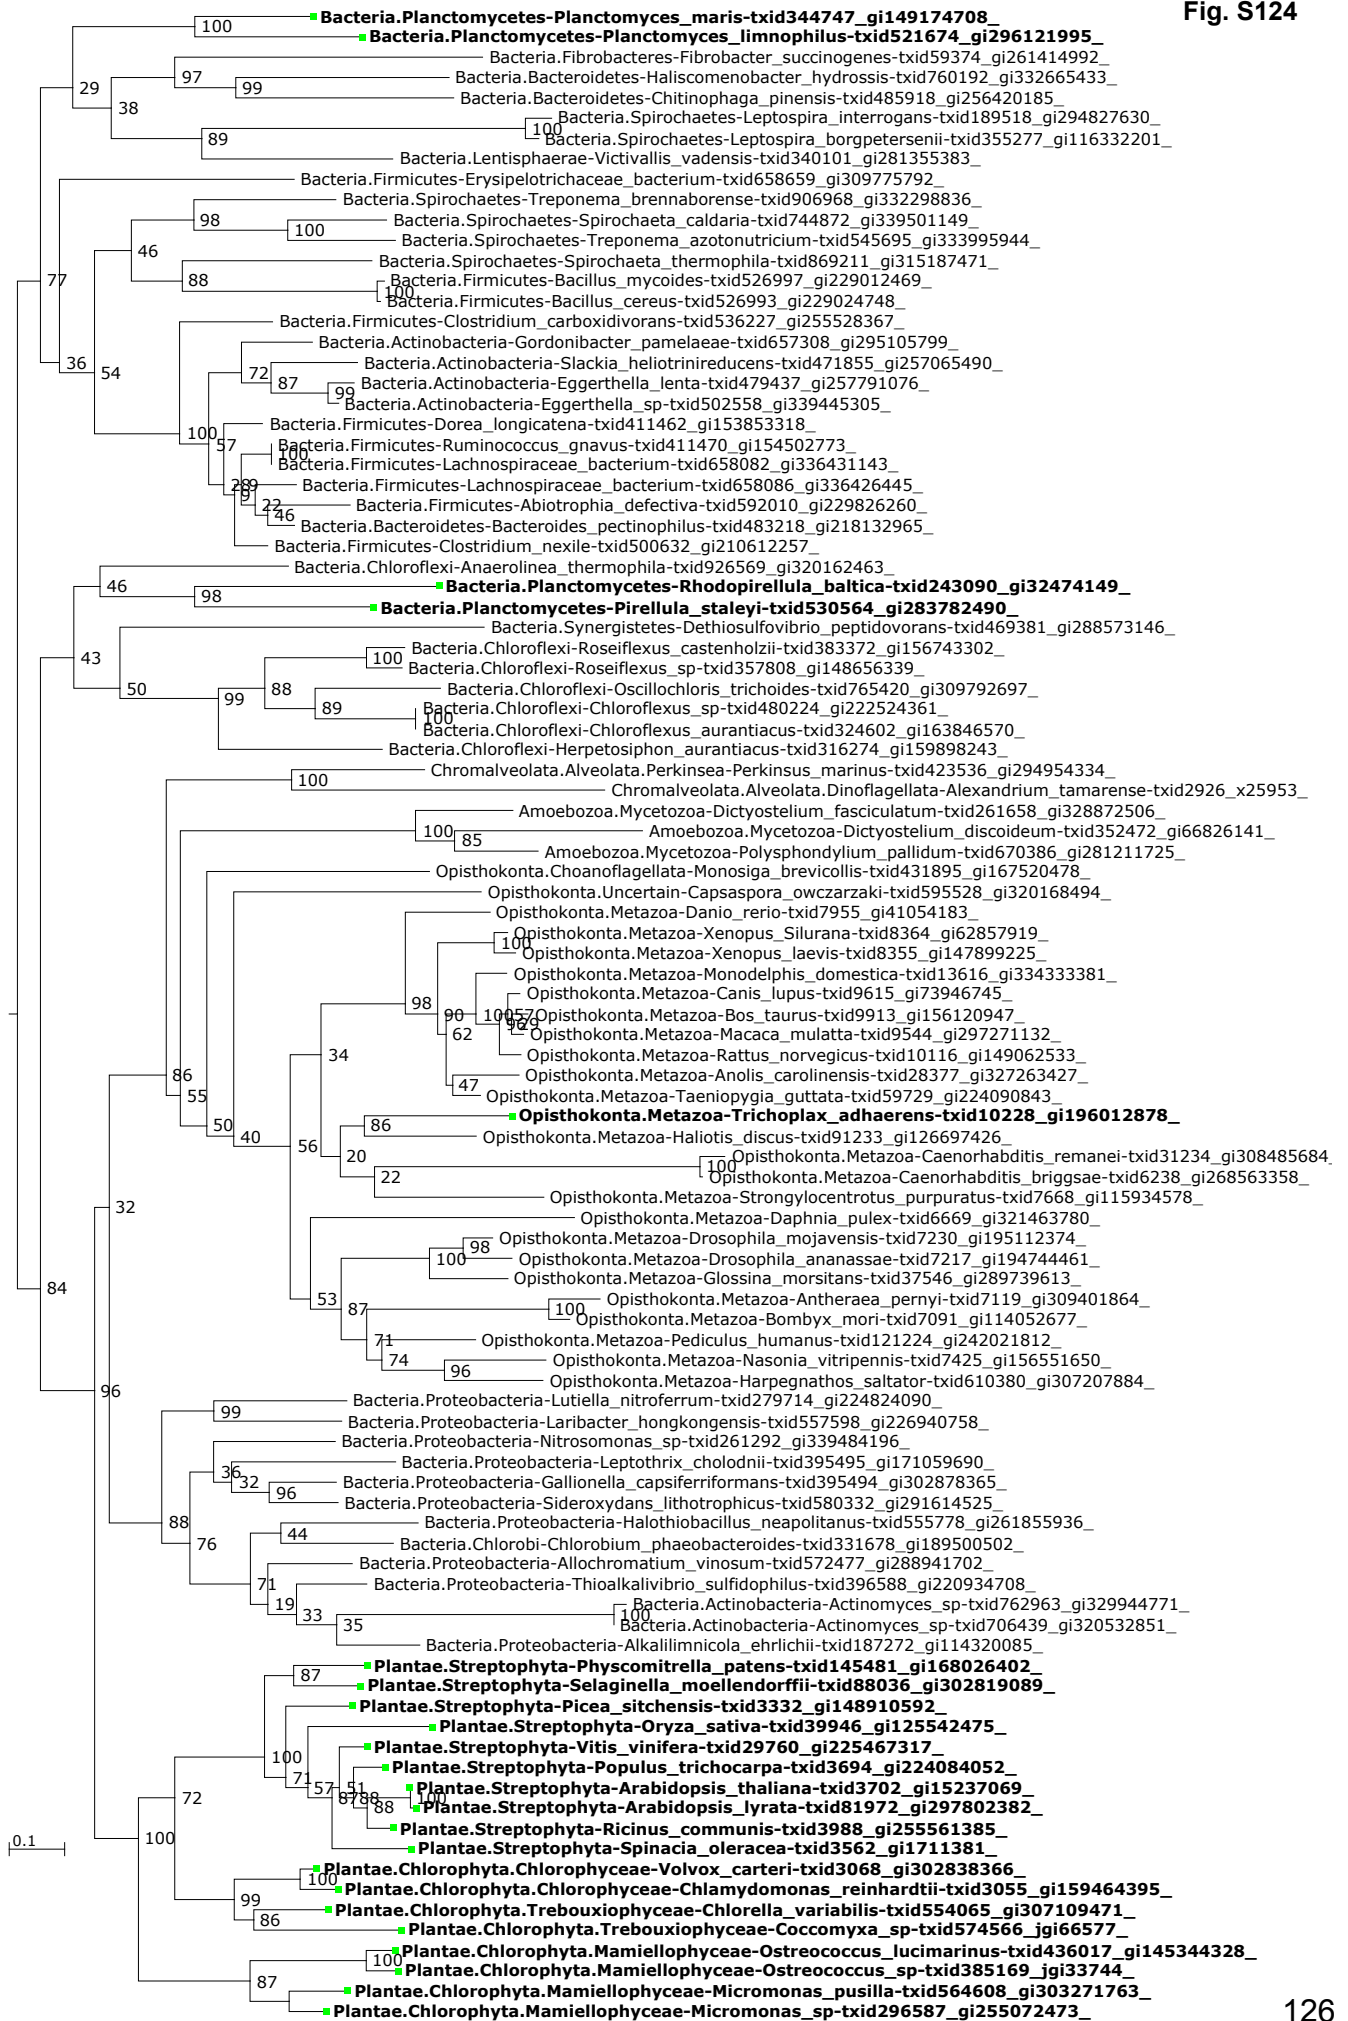

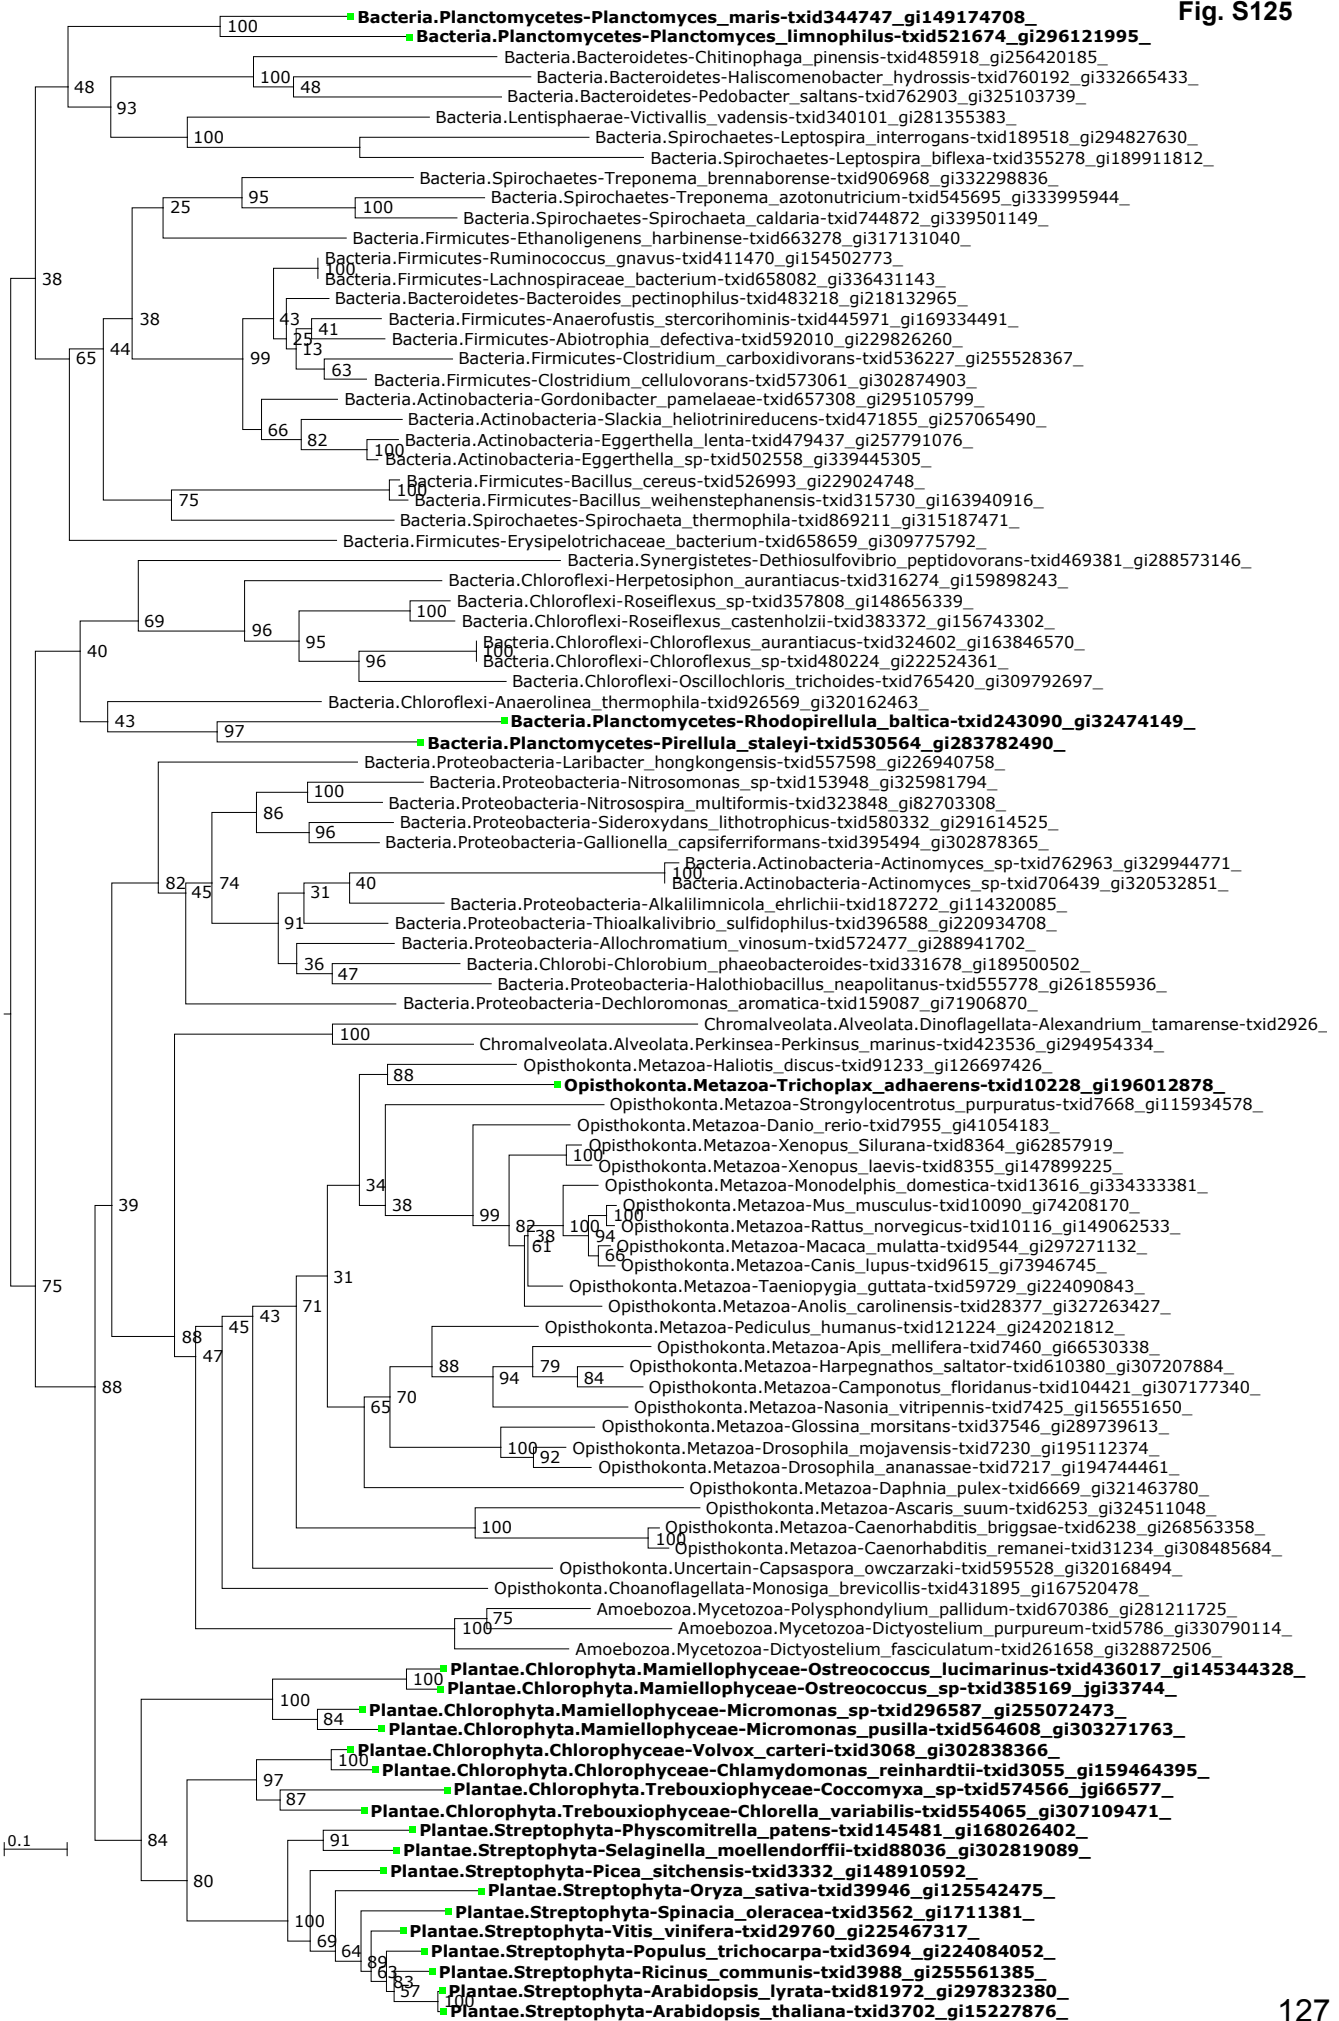

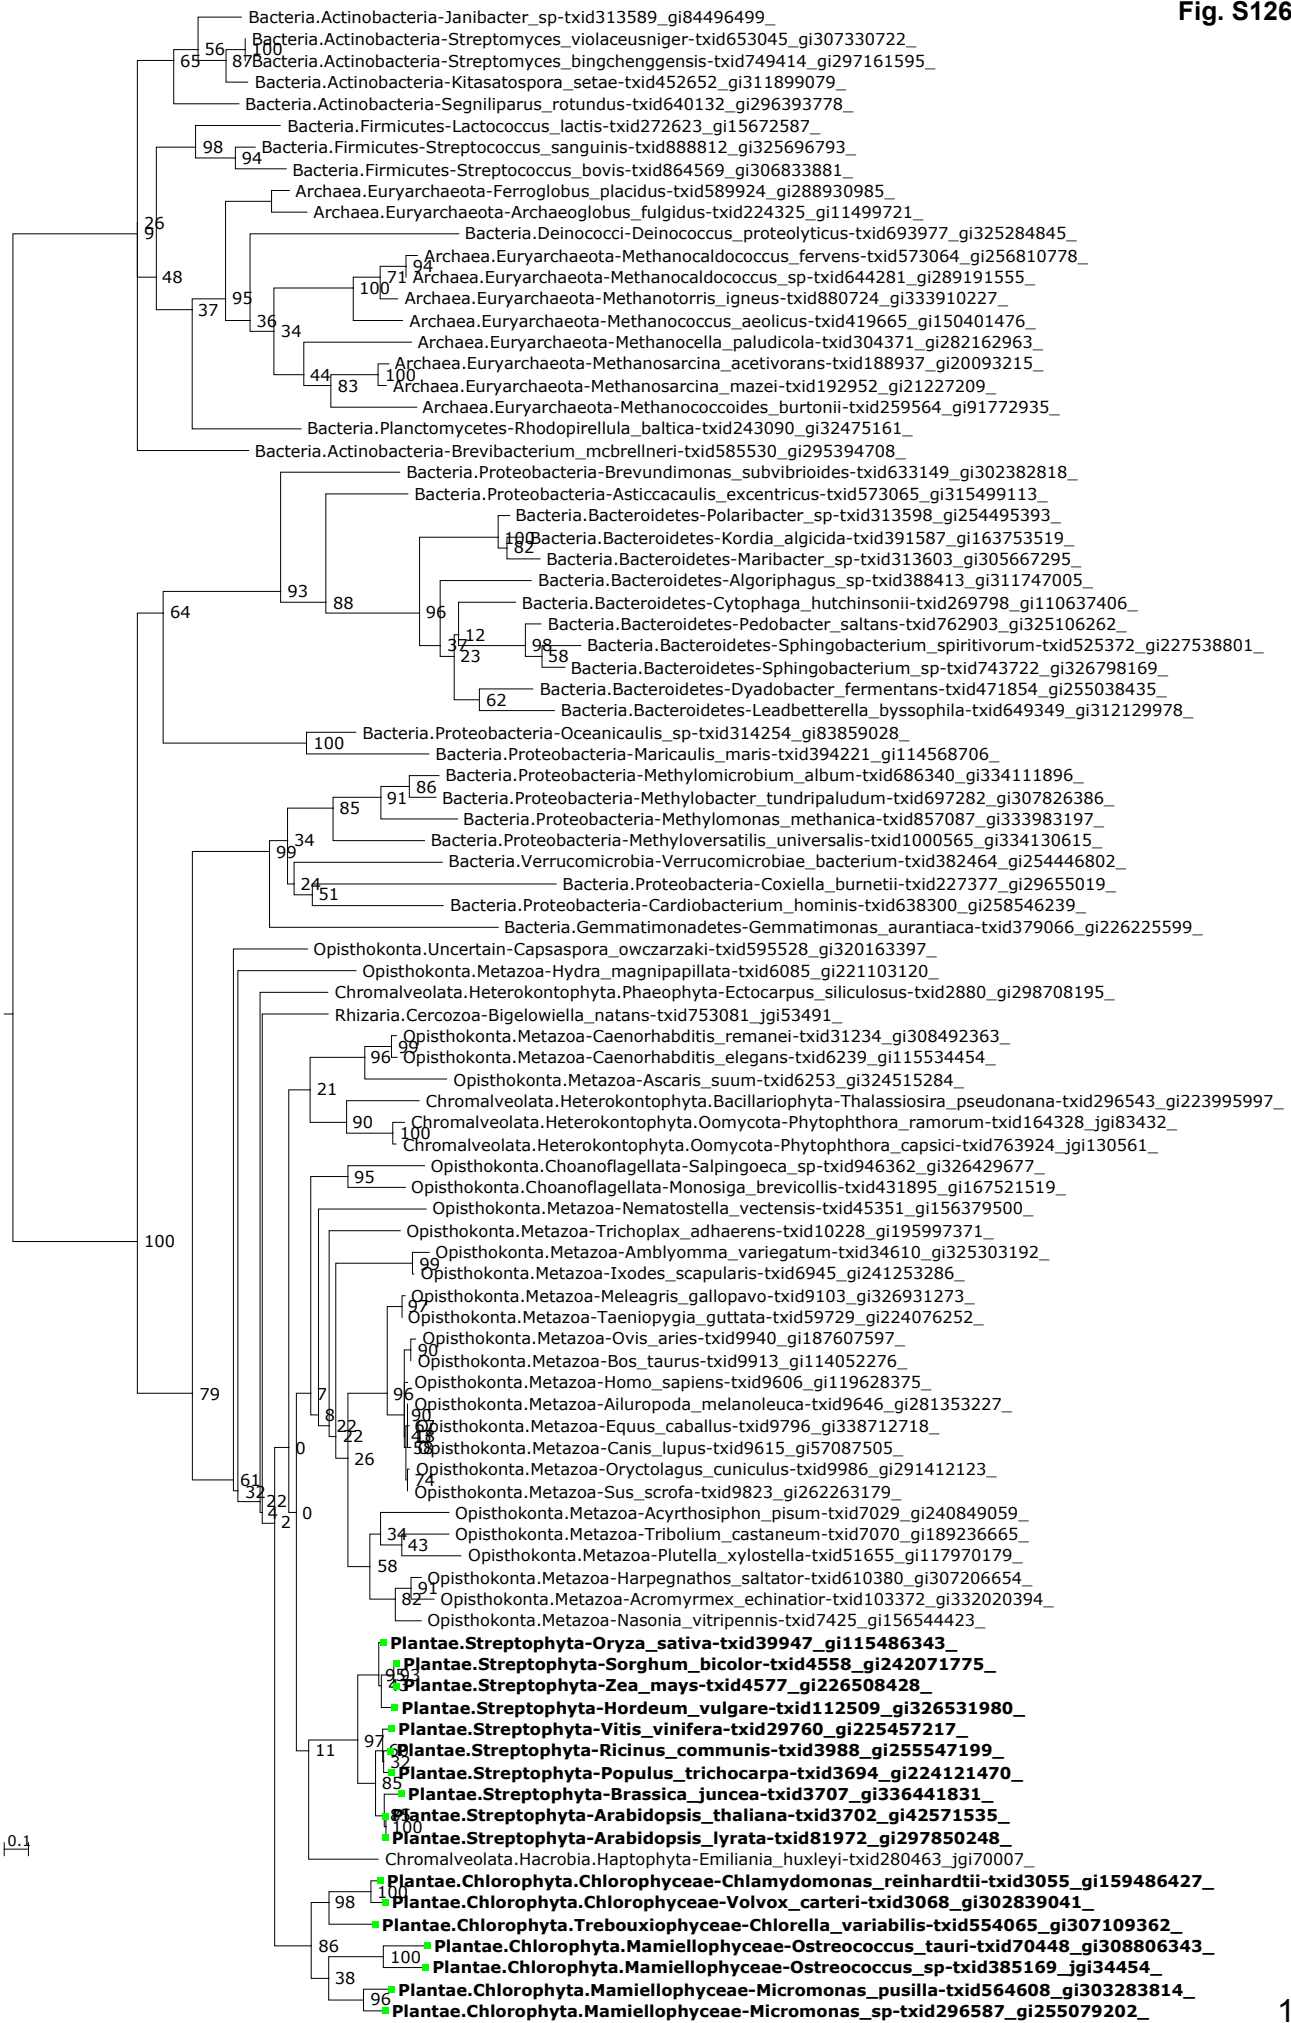



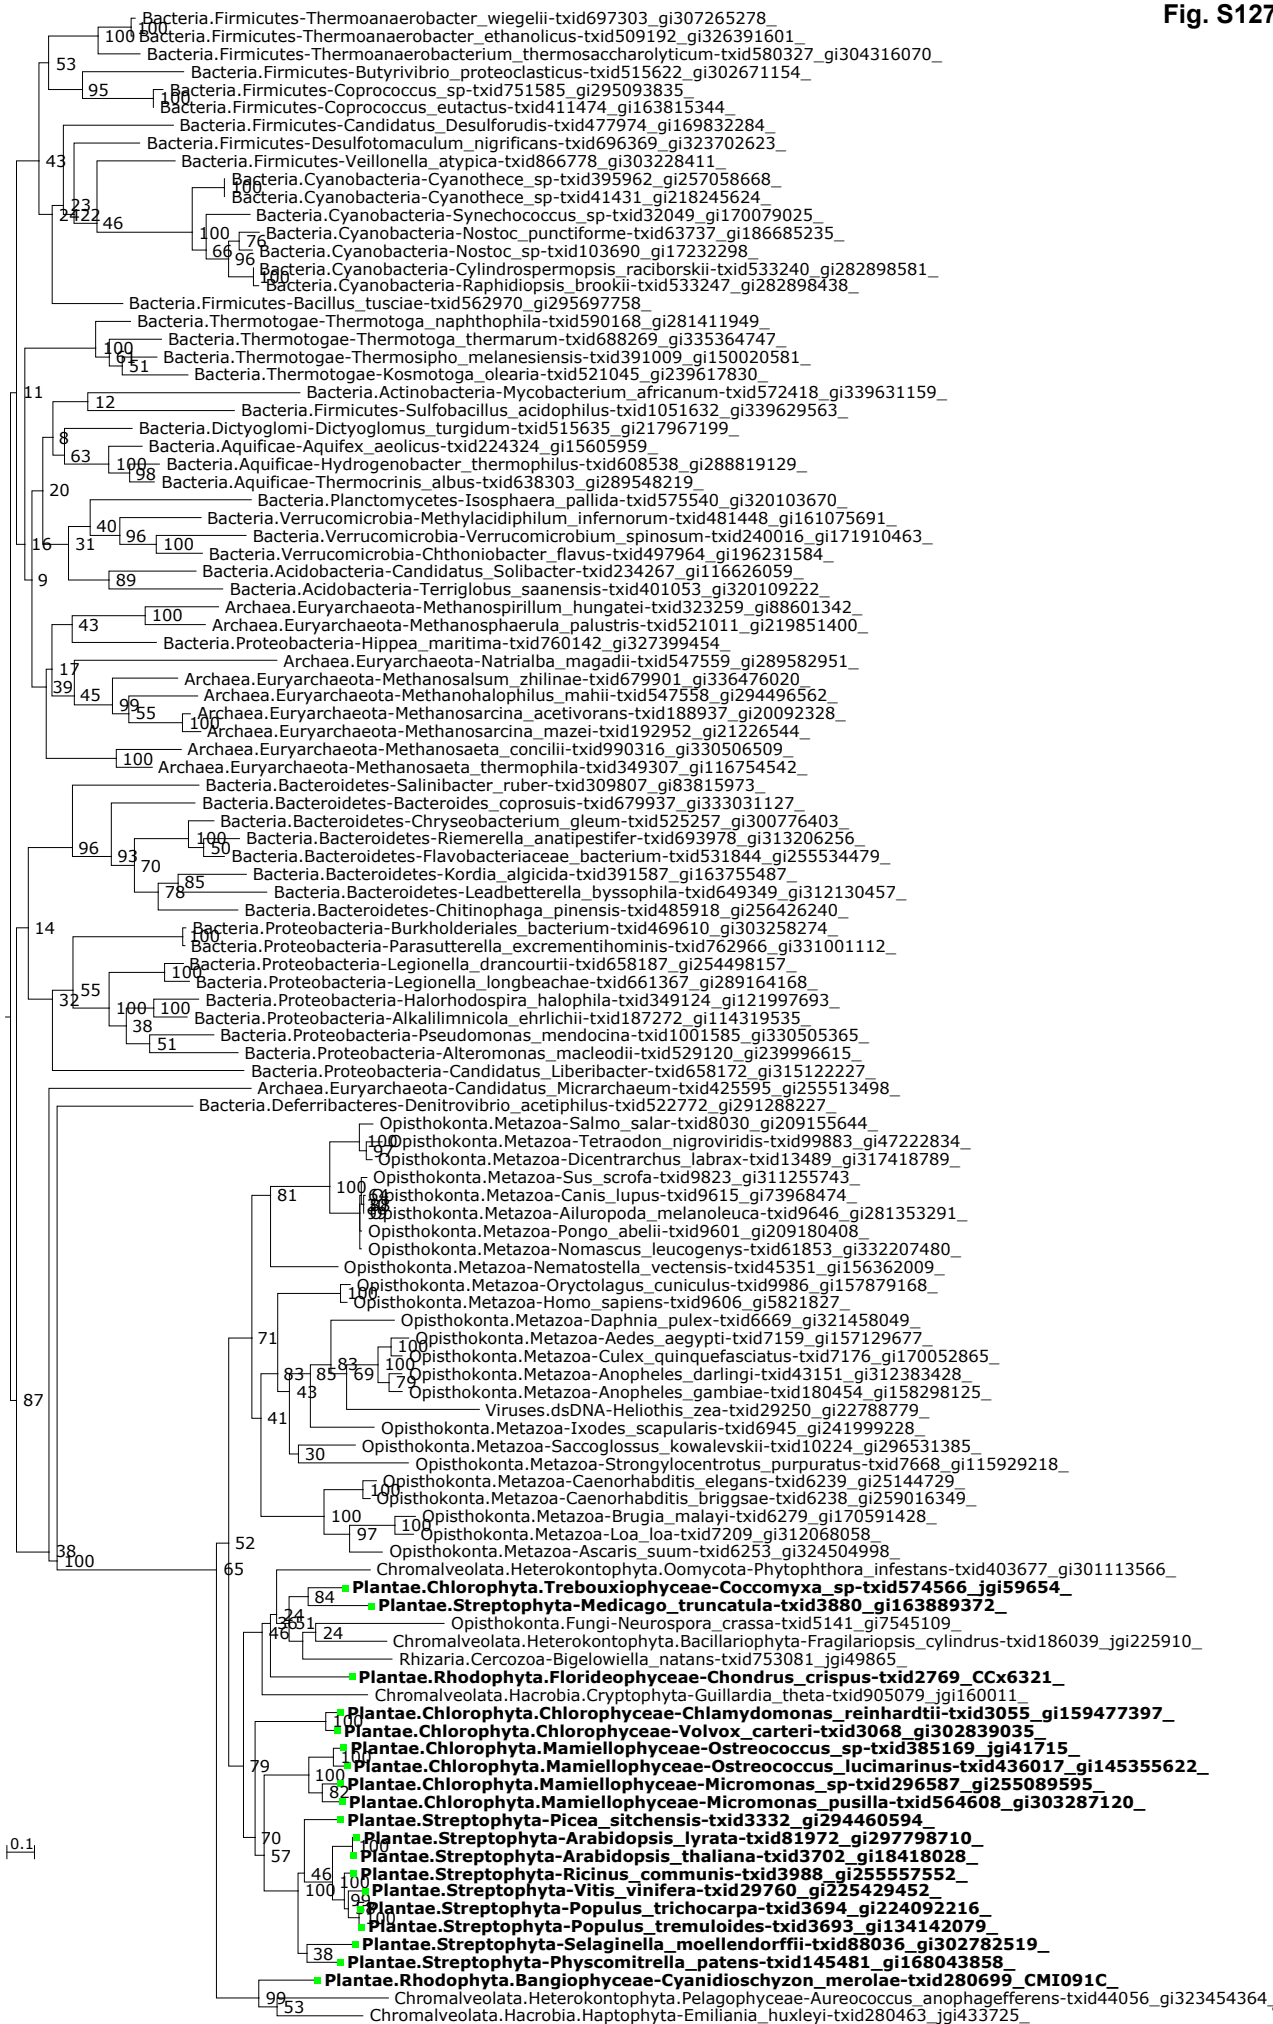

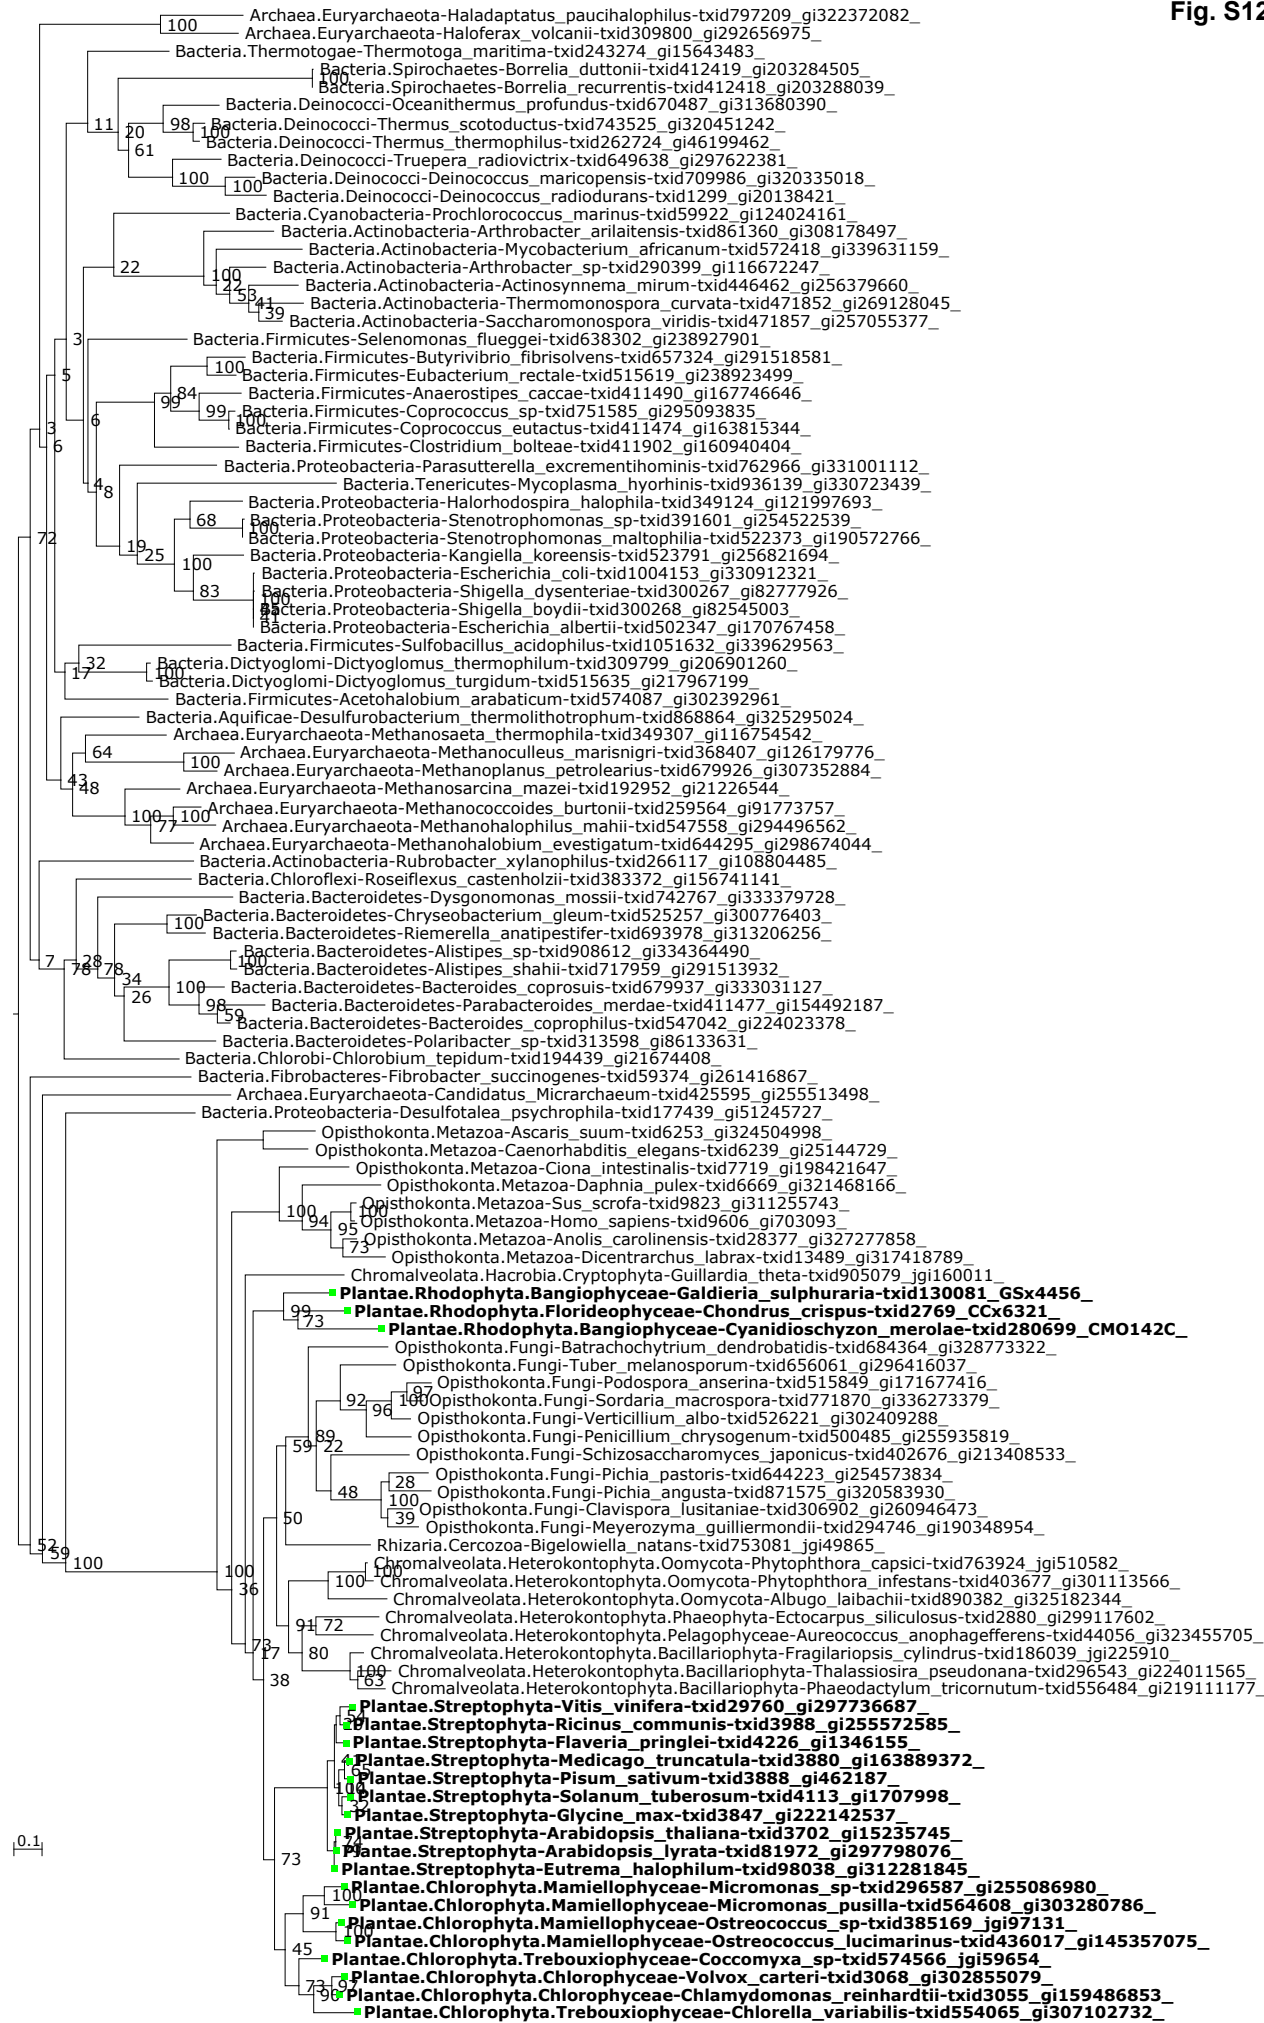

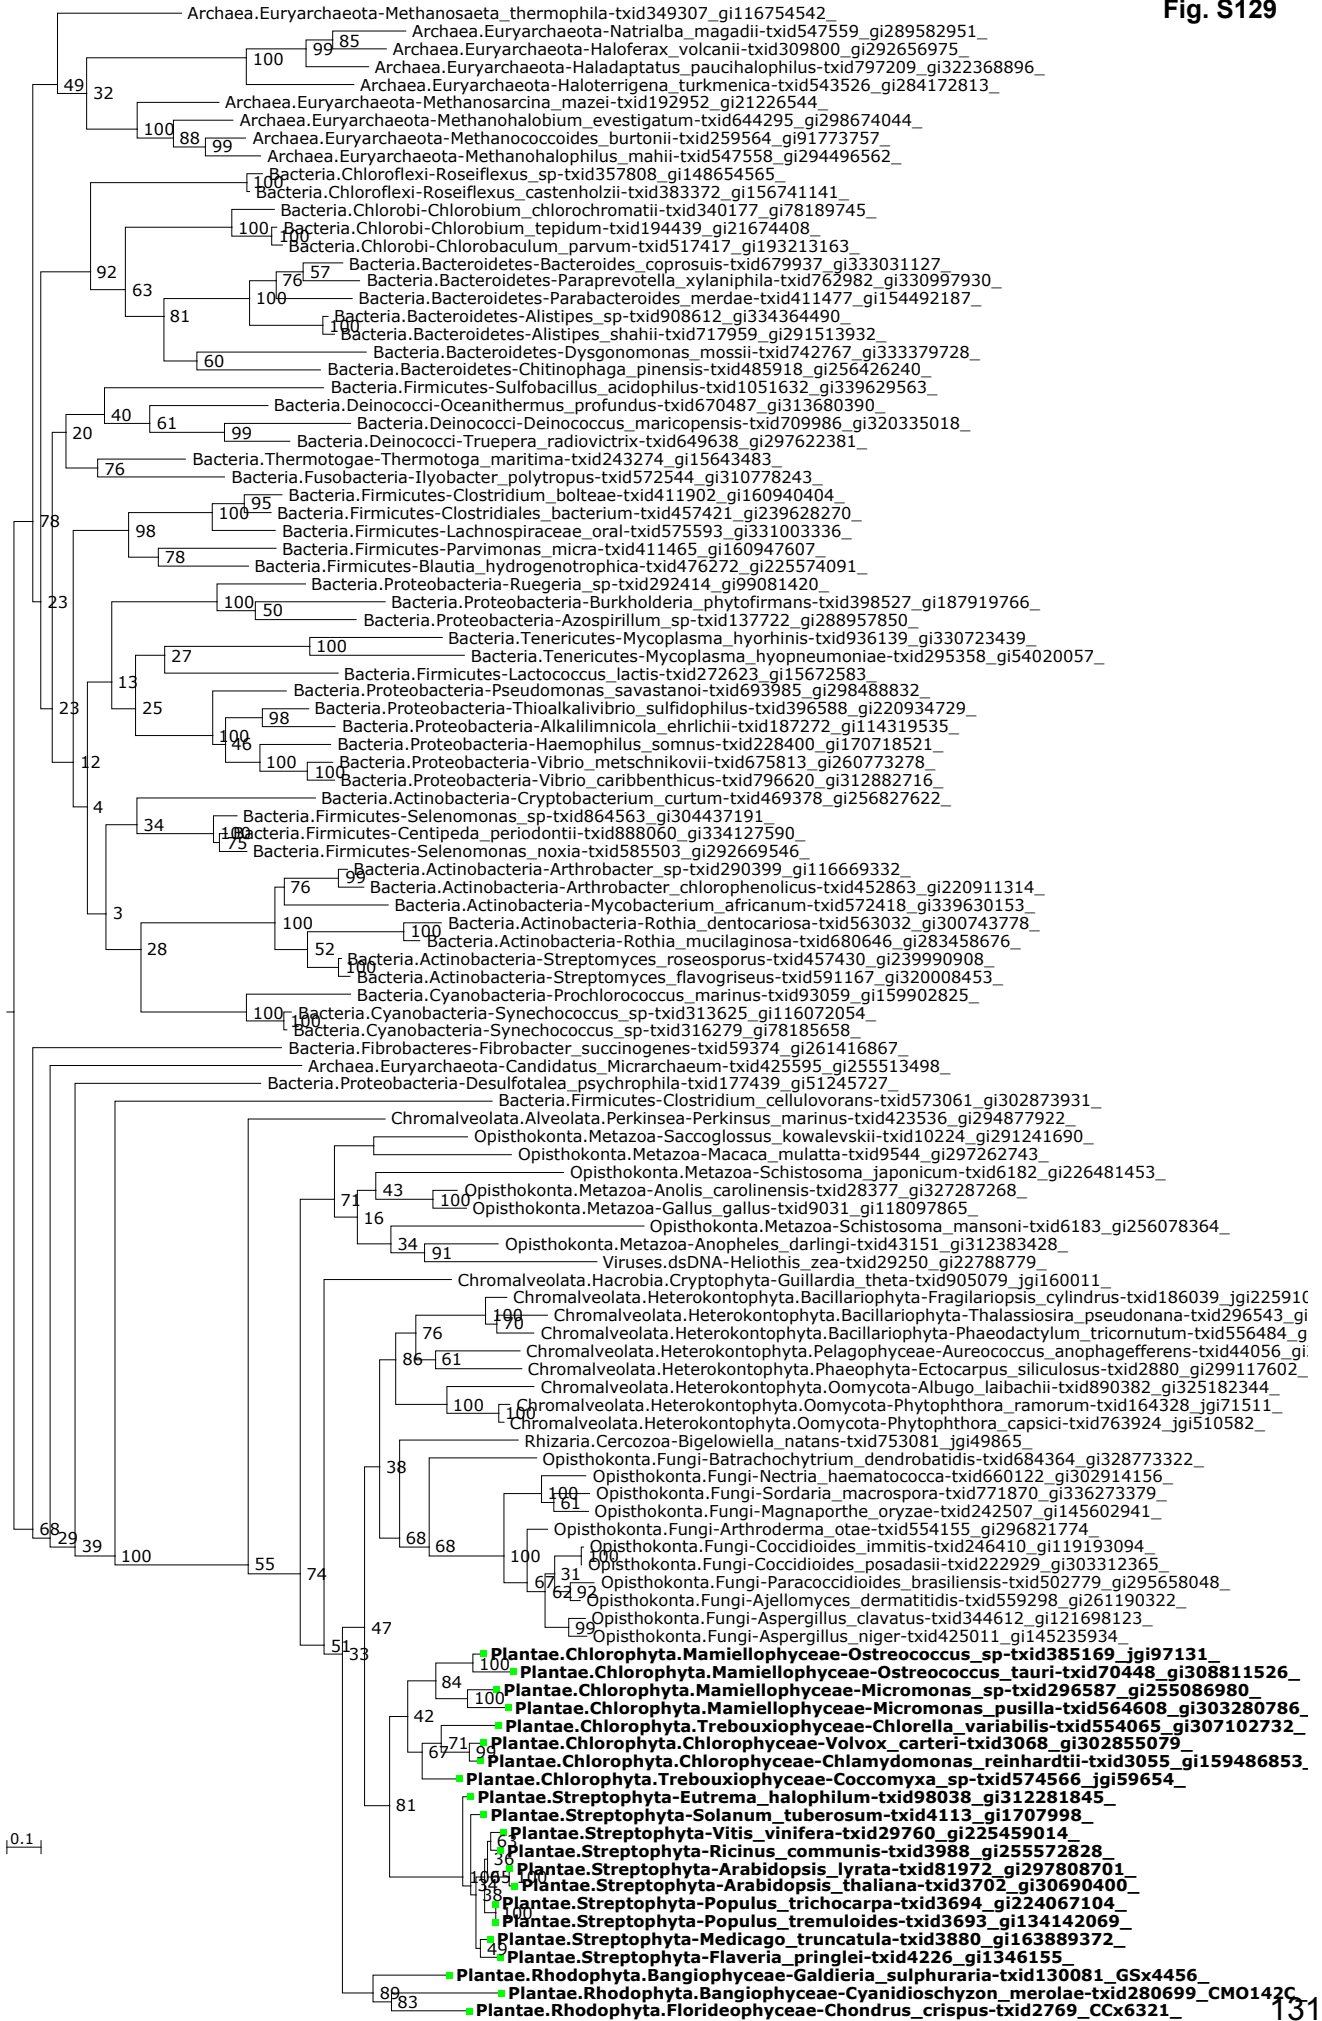

Fig. S130

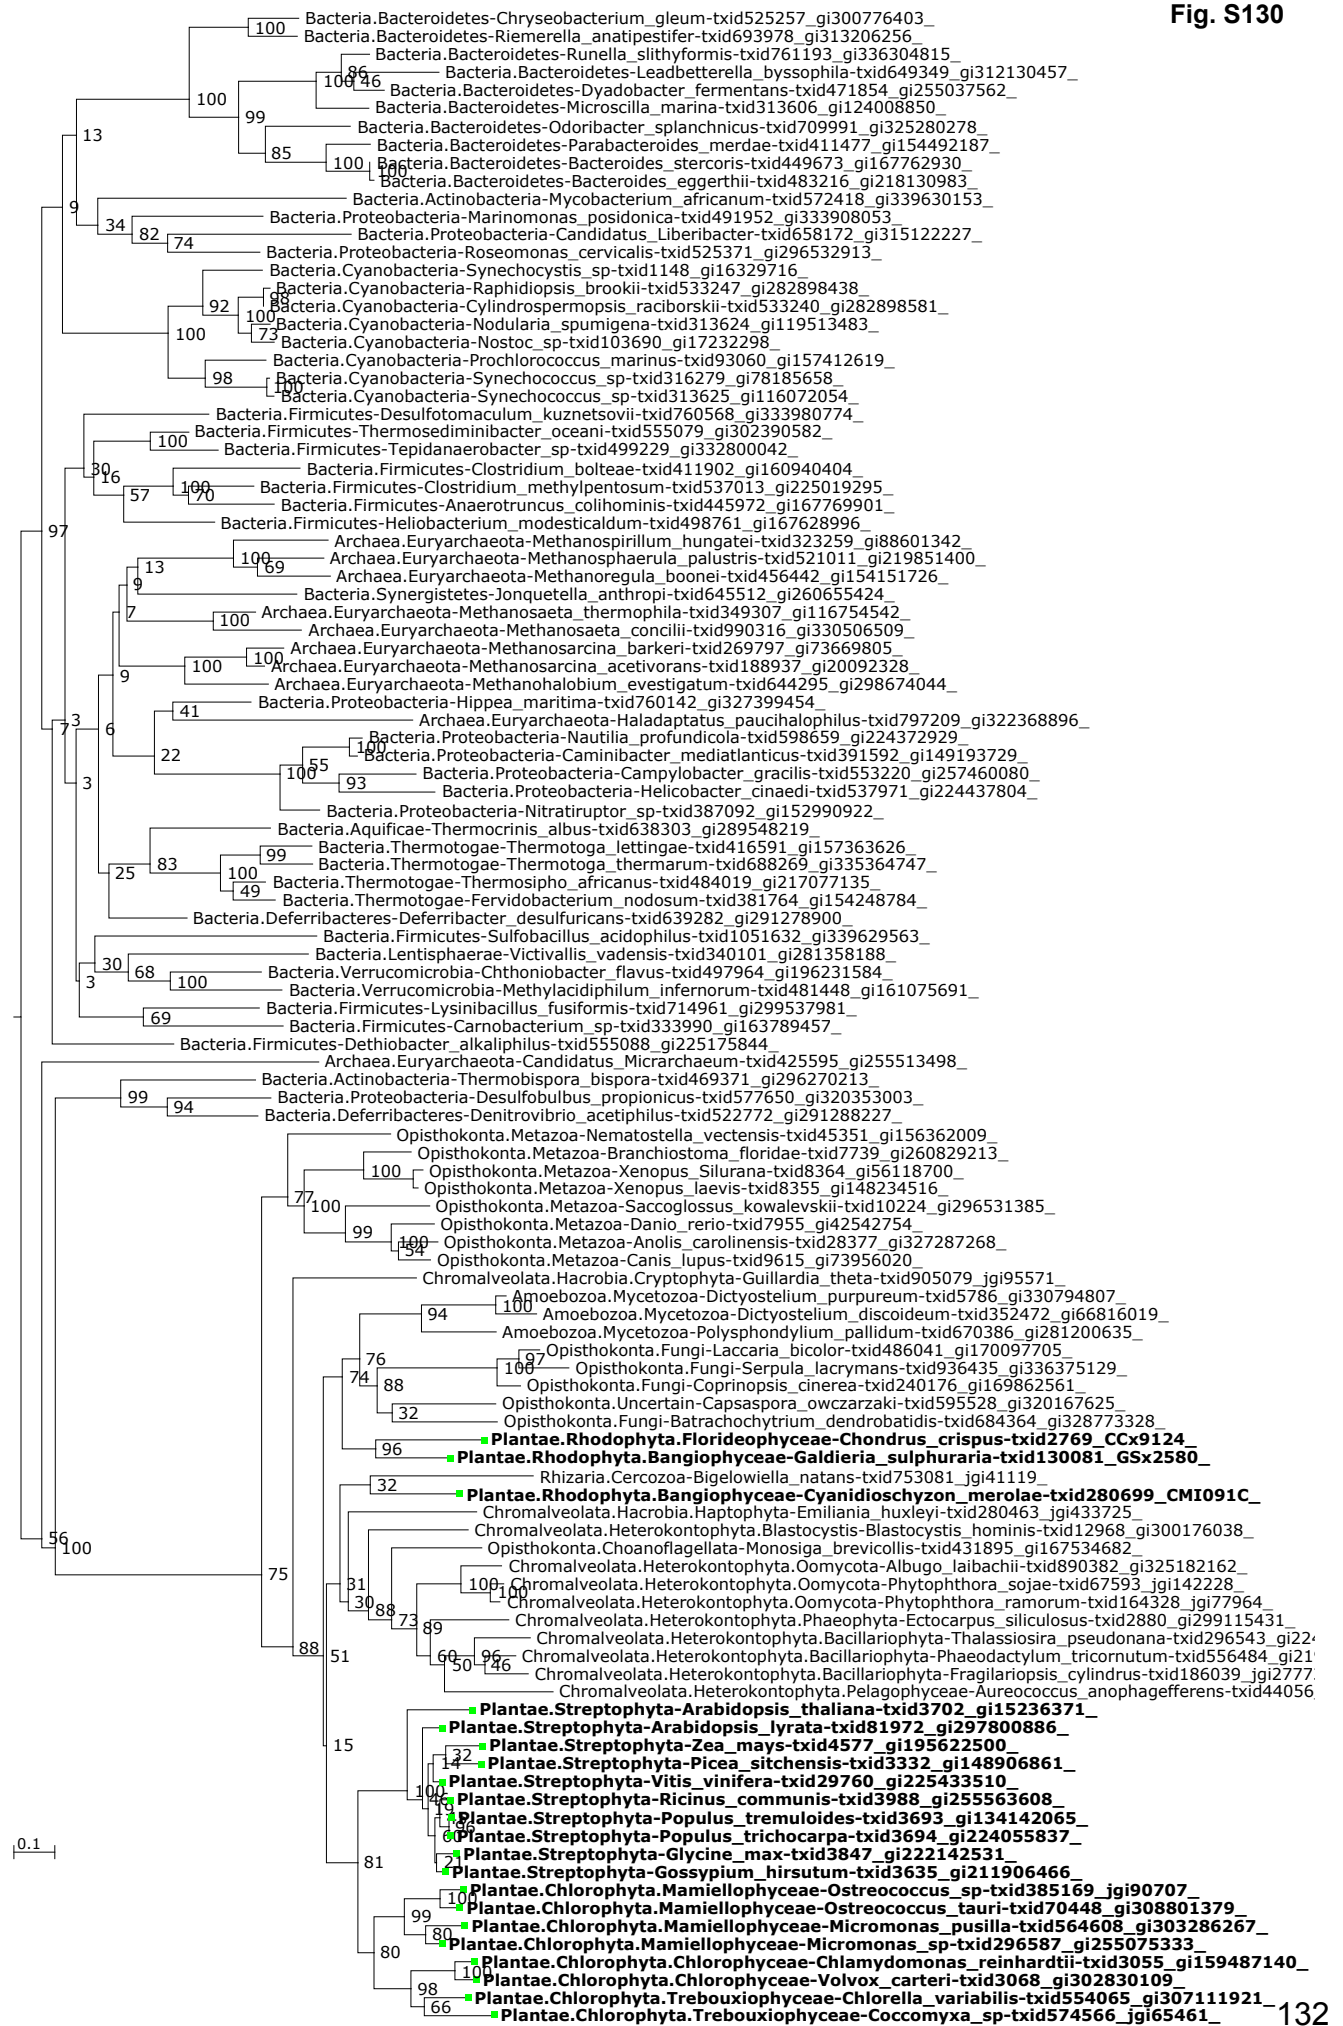

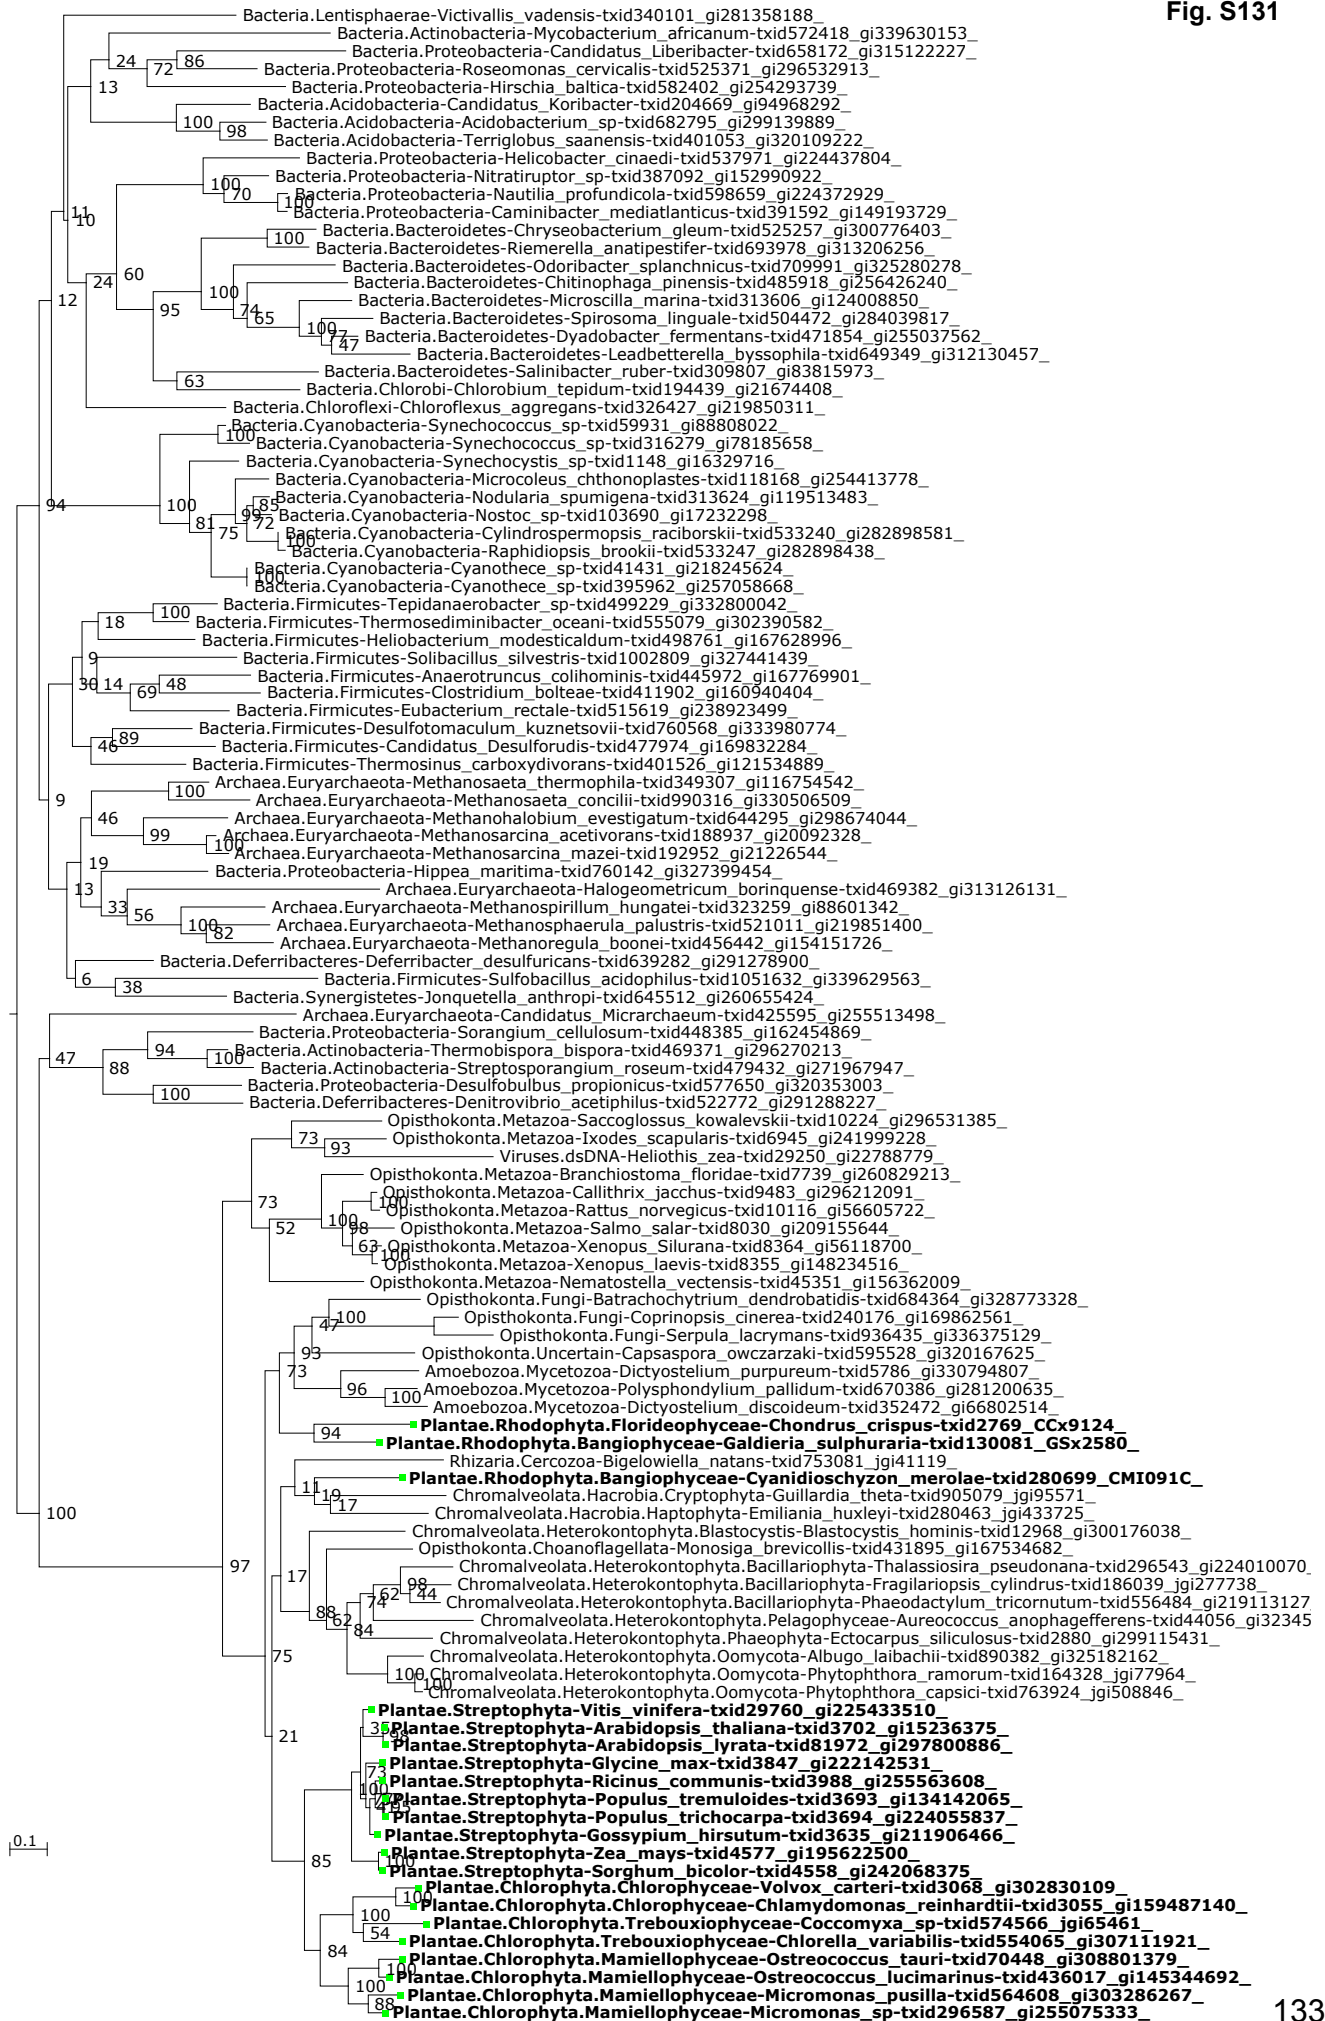

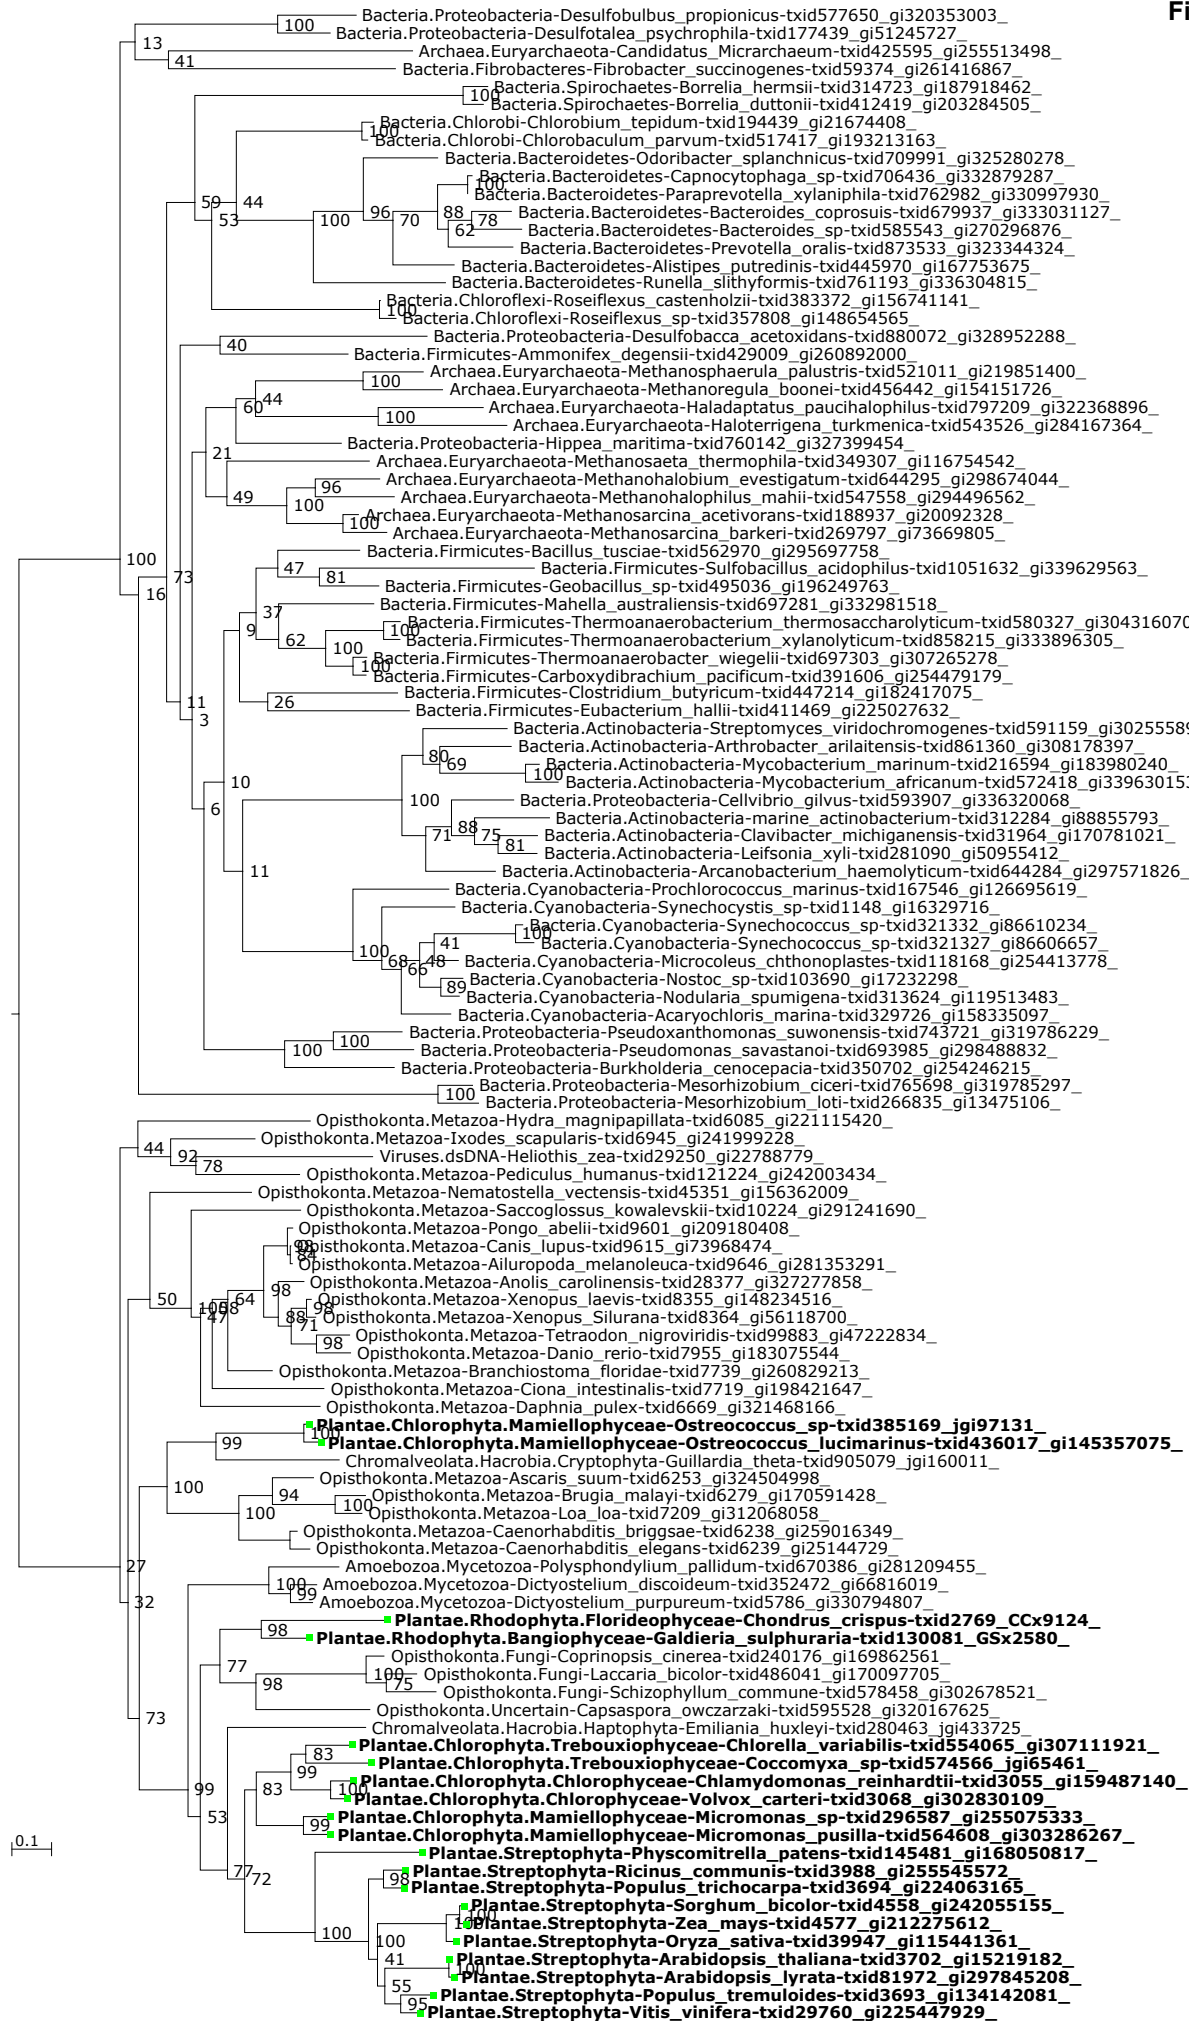

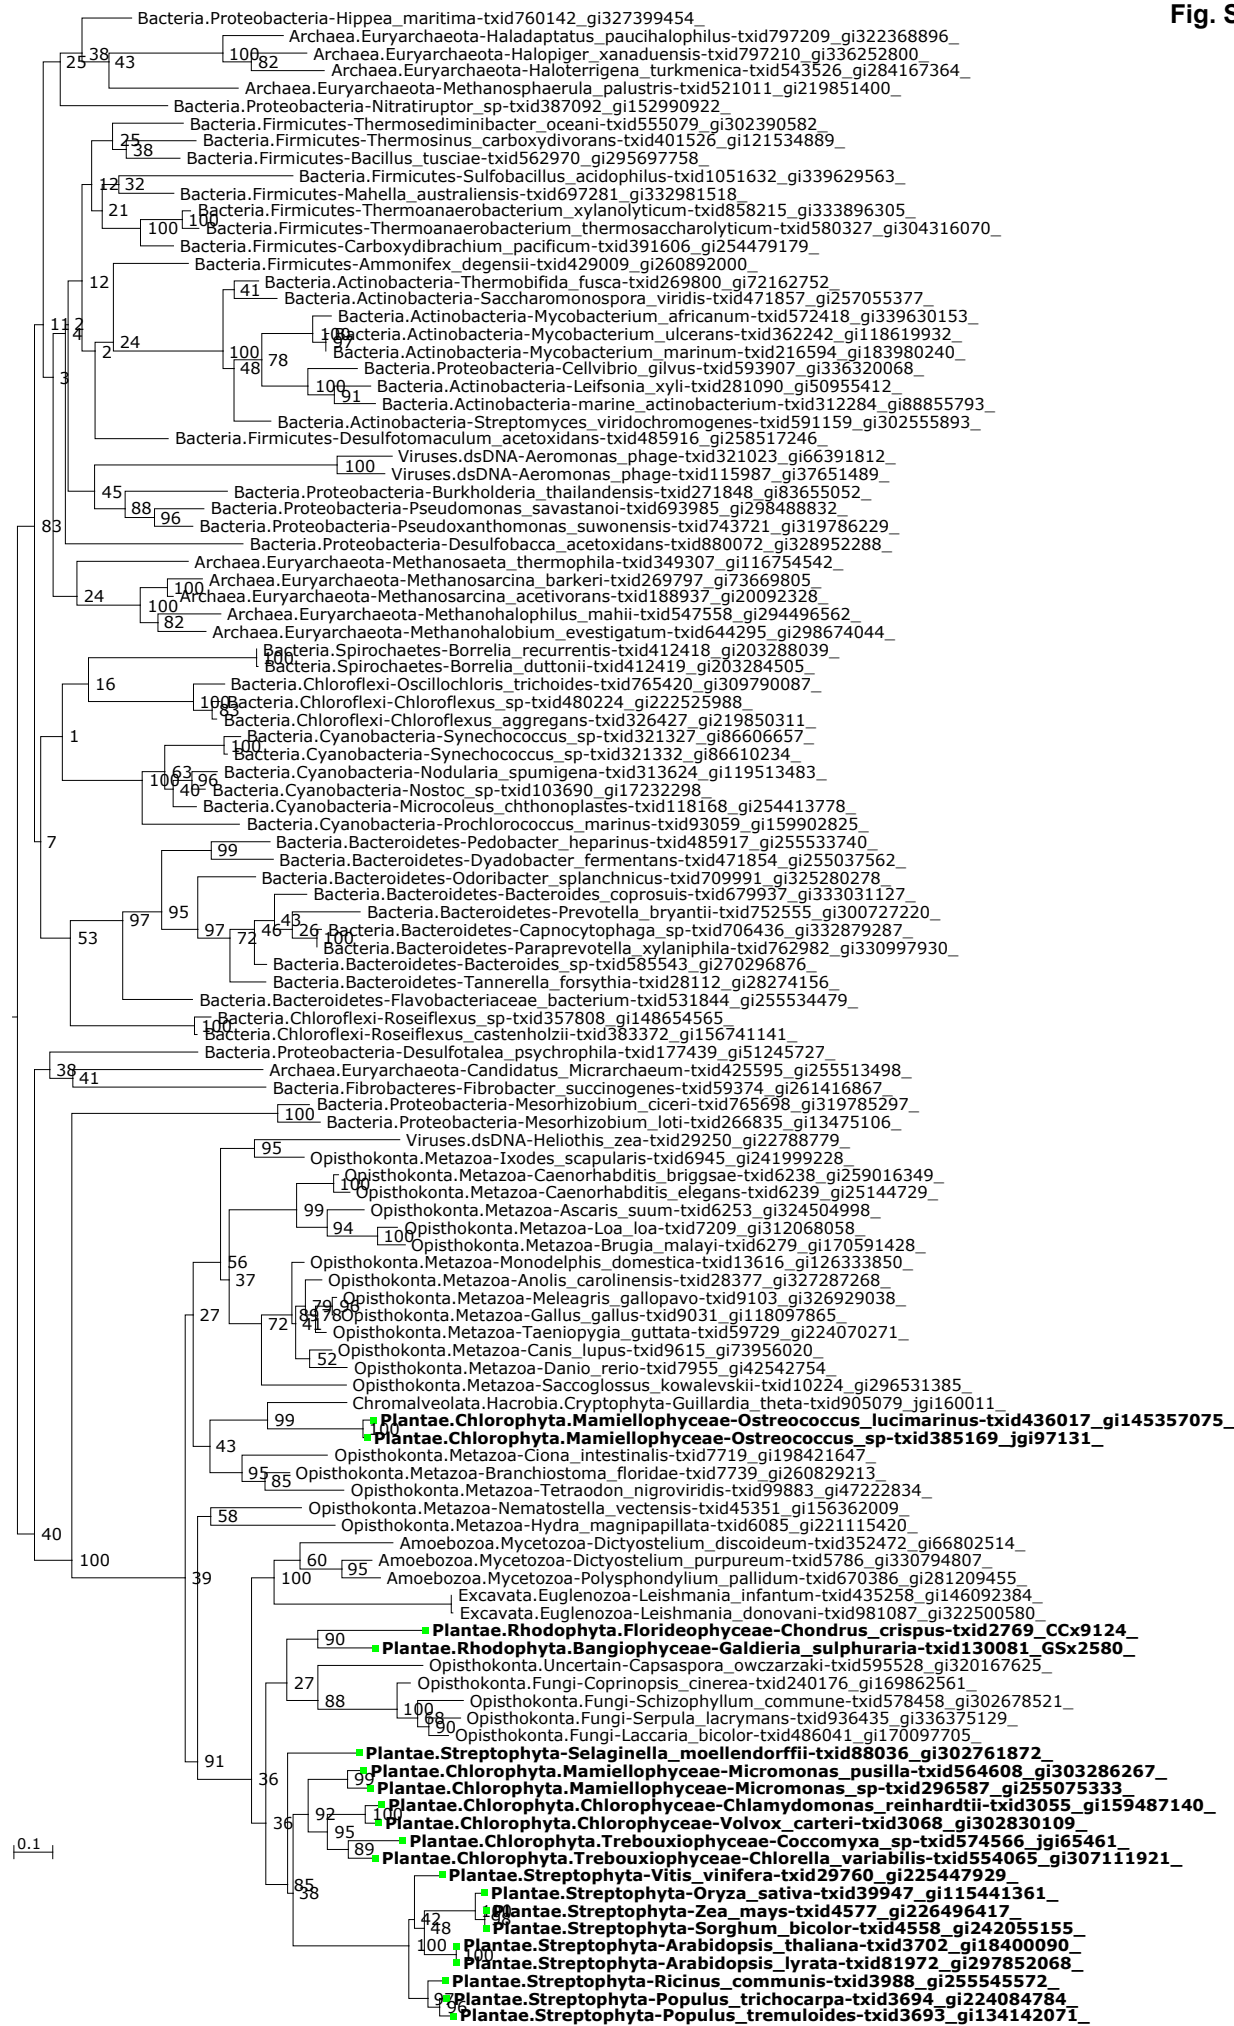

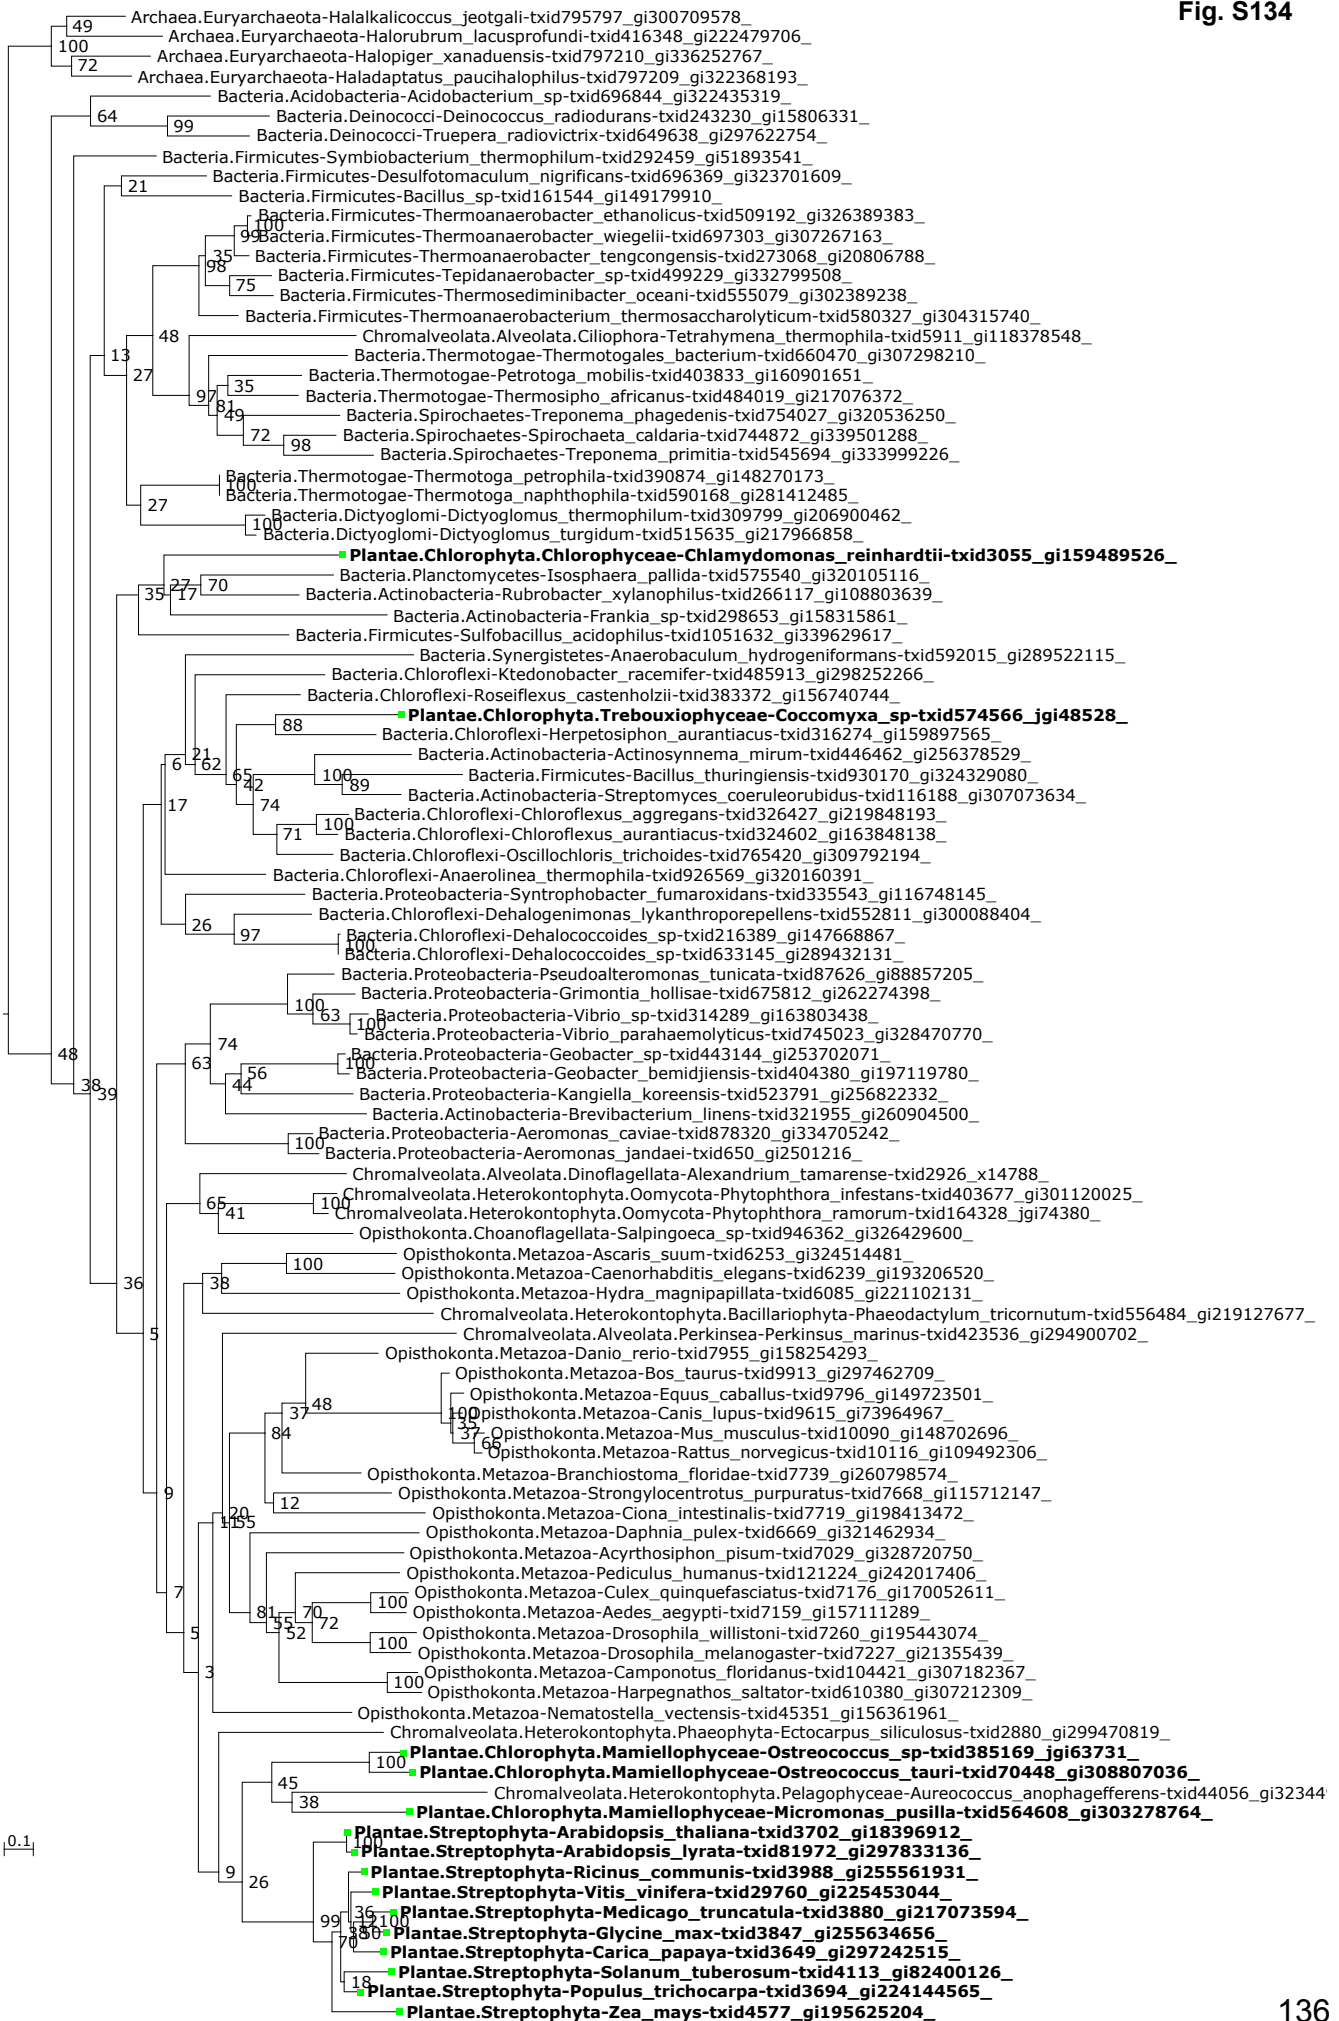



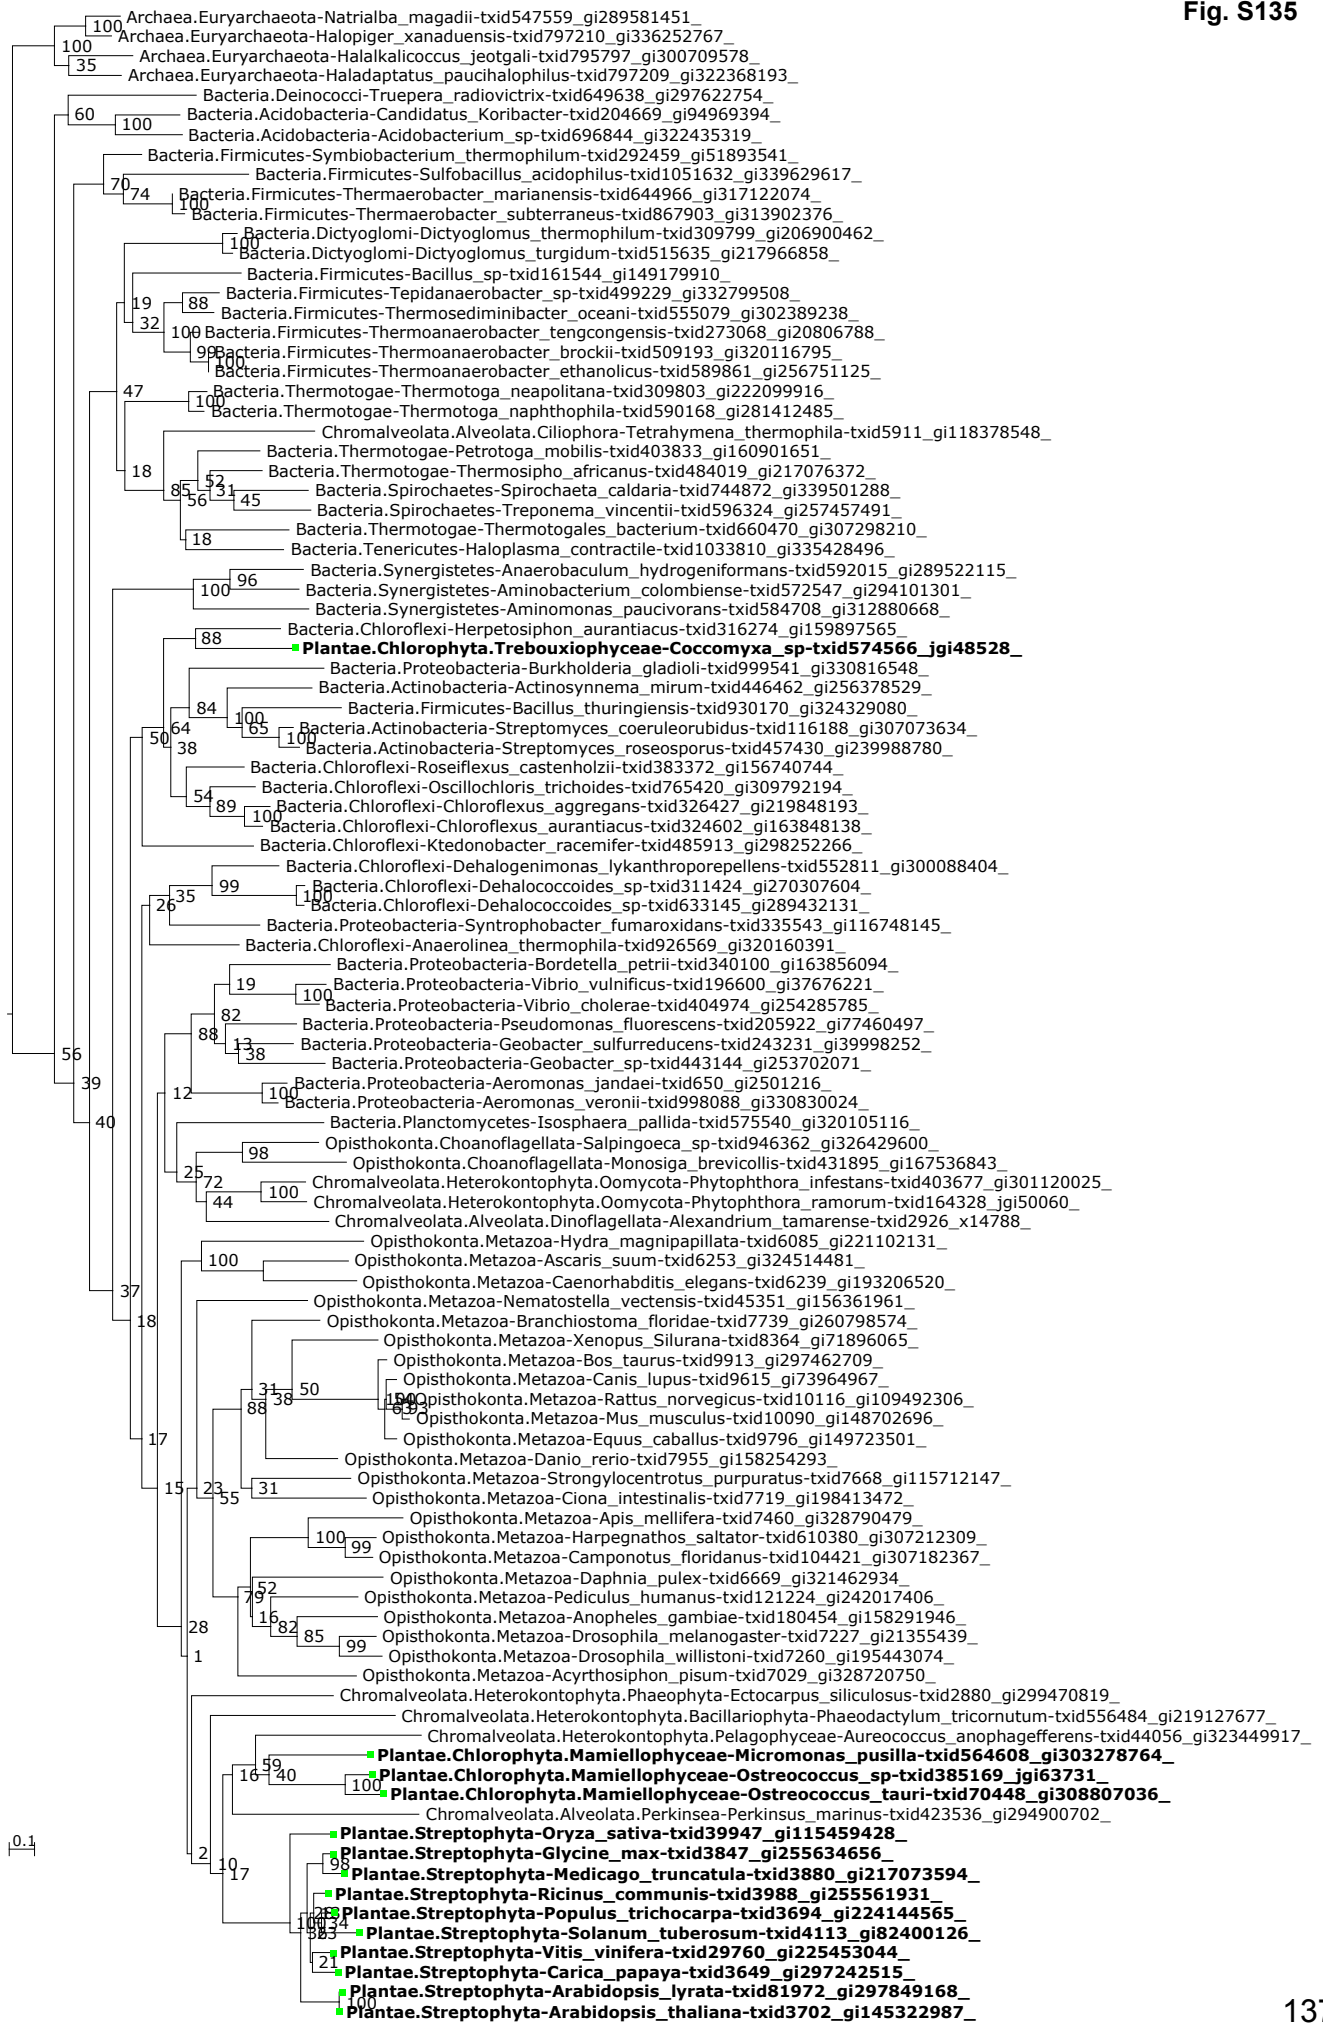

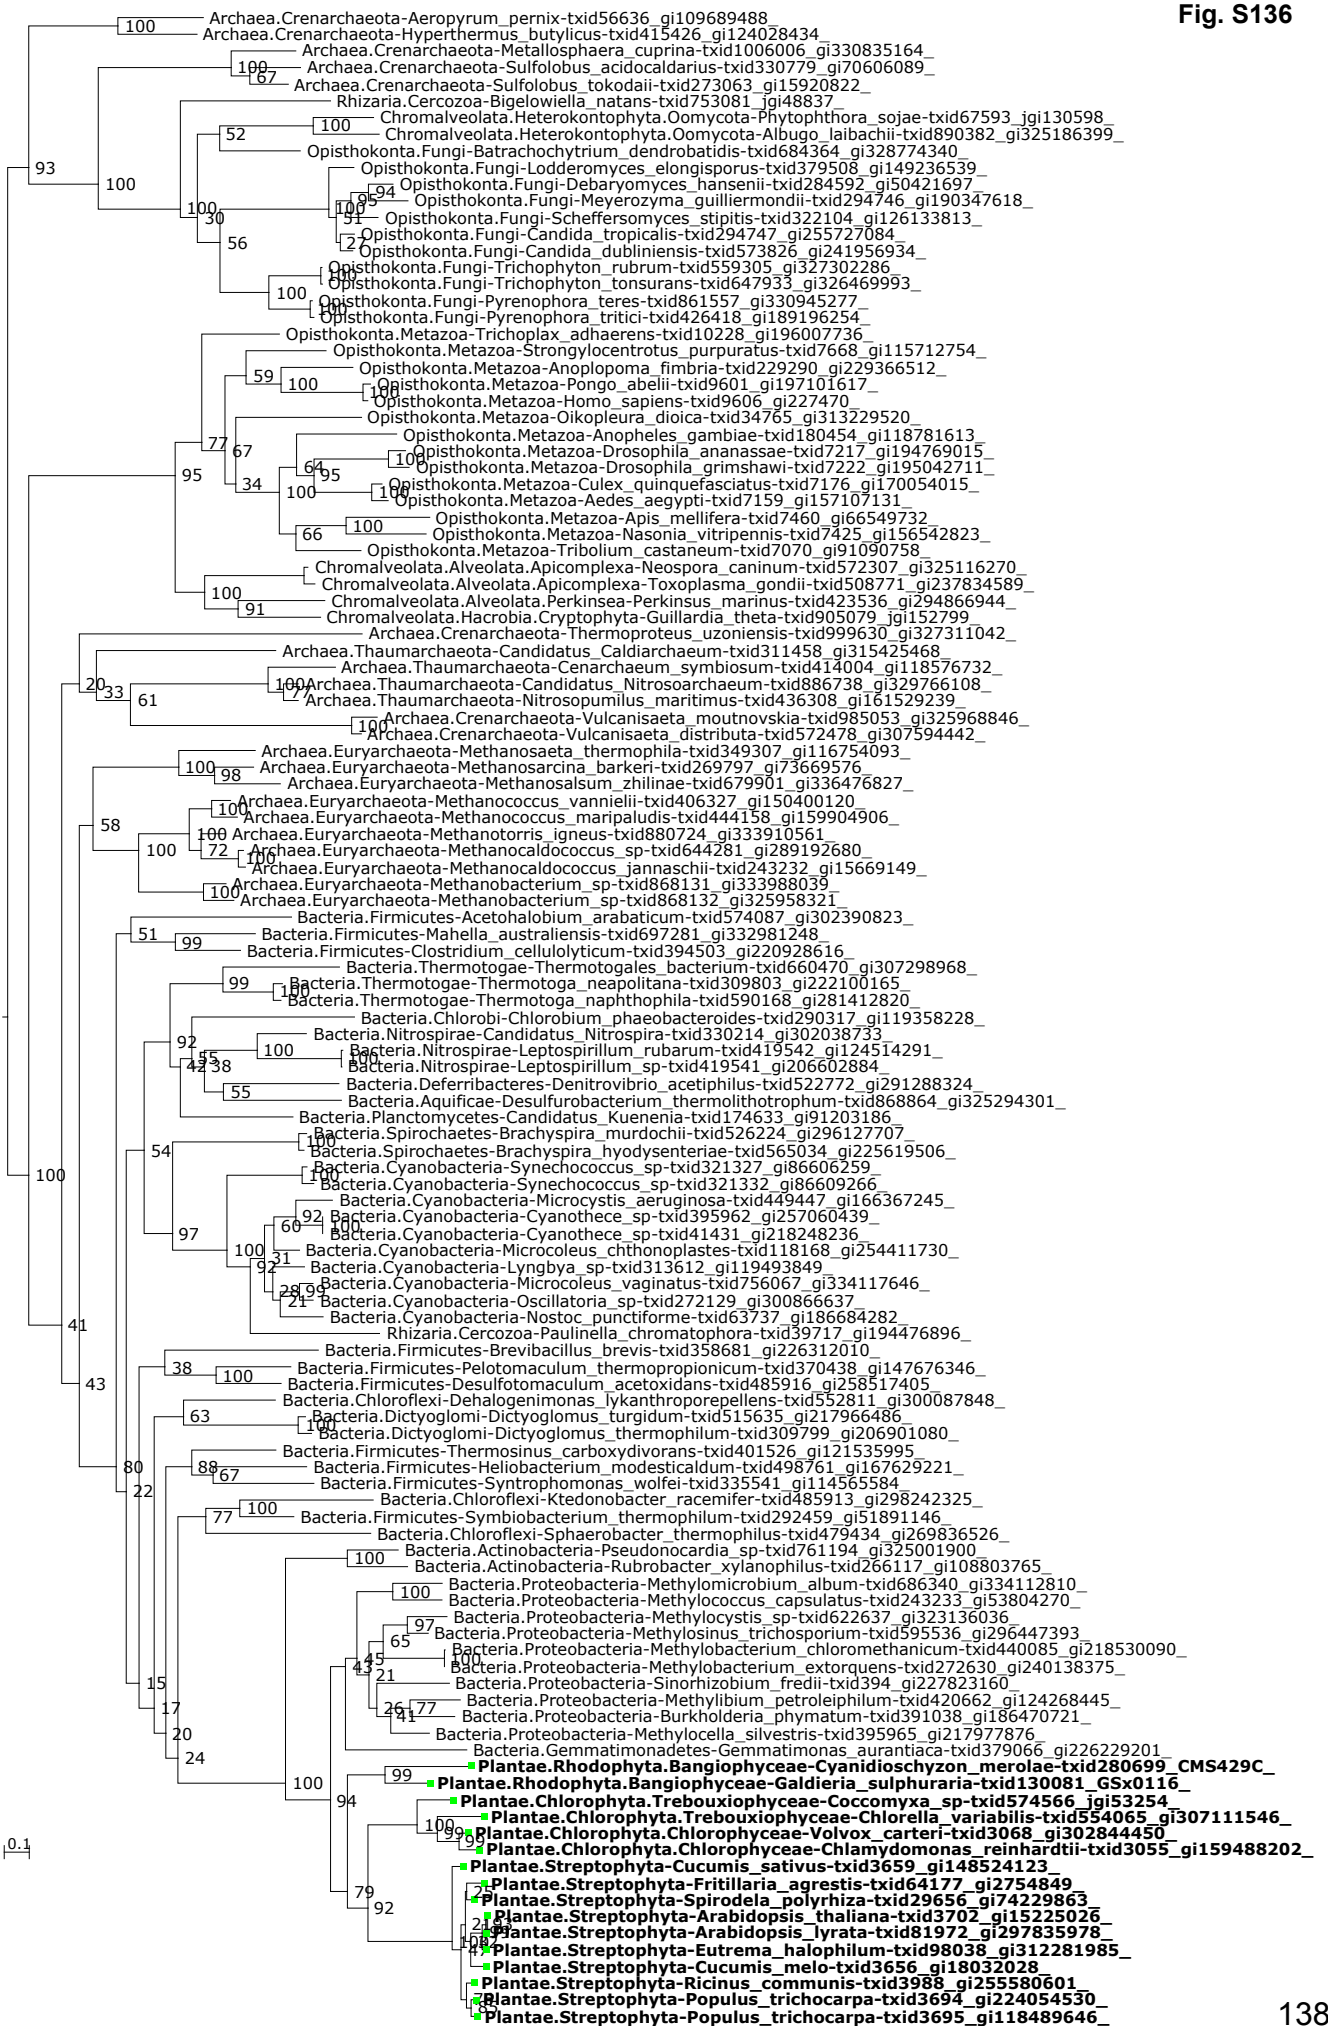

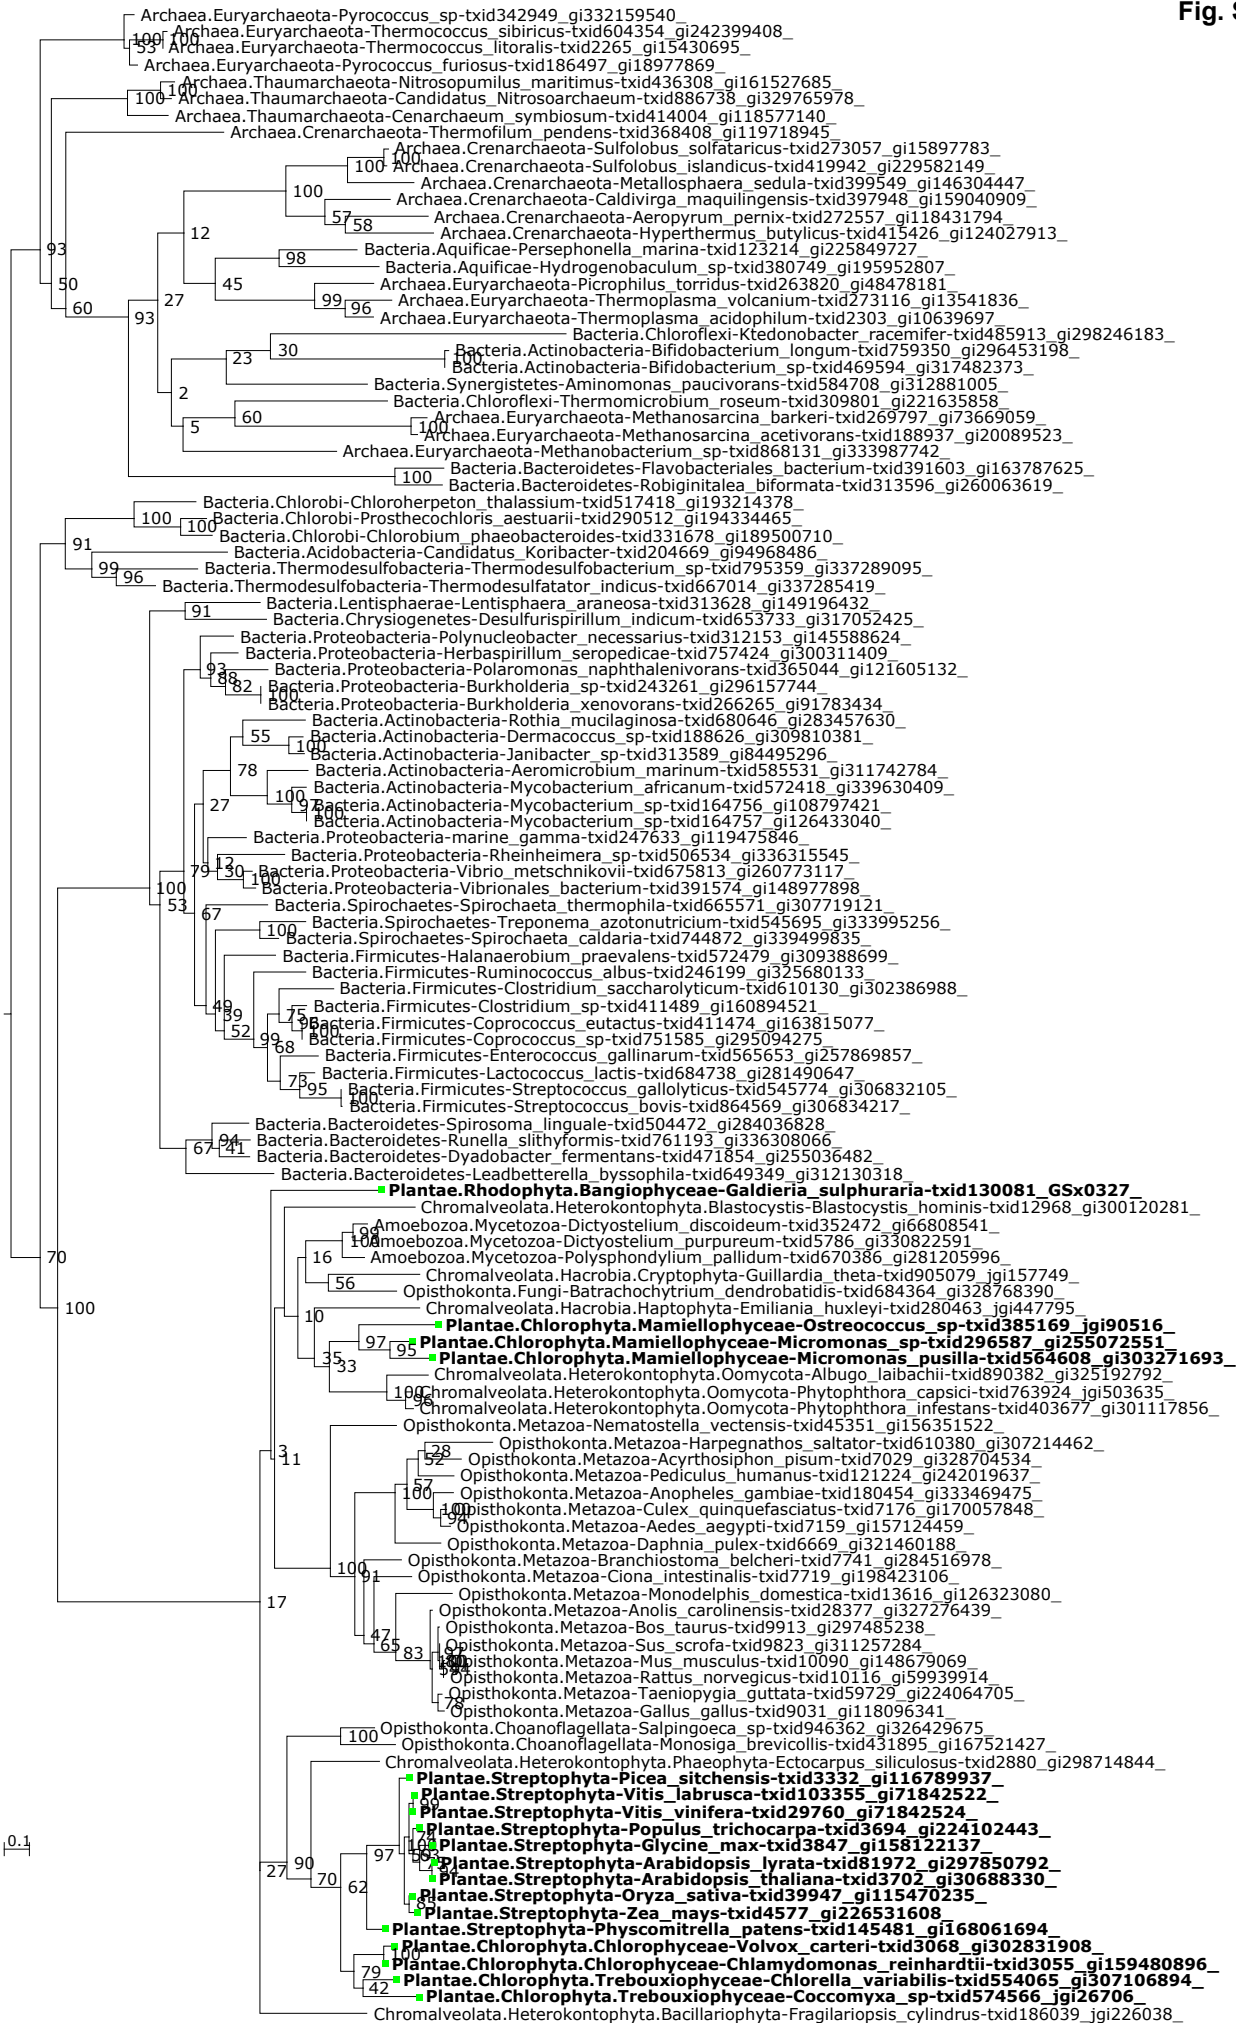

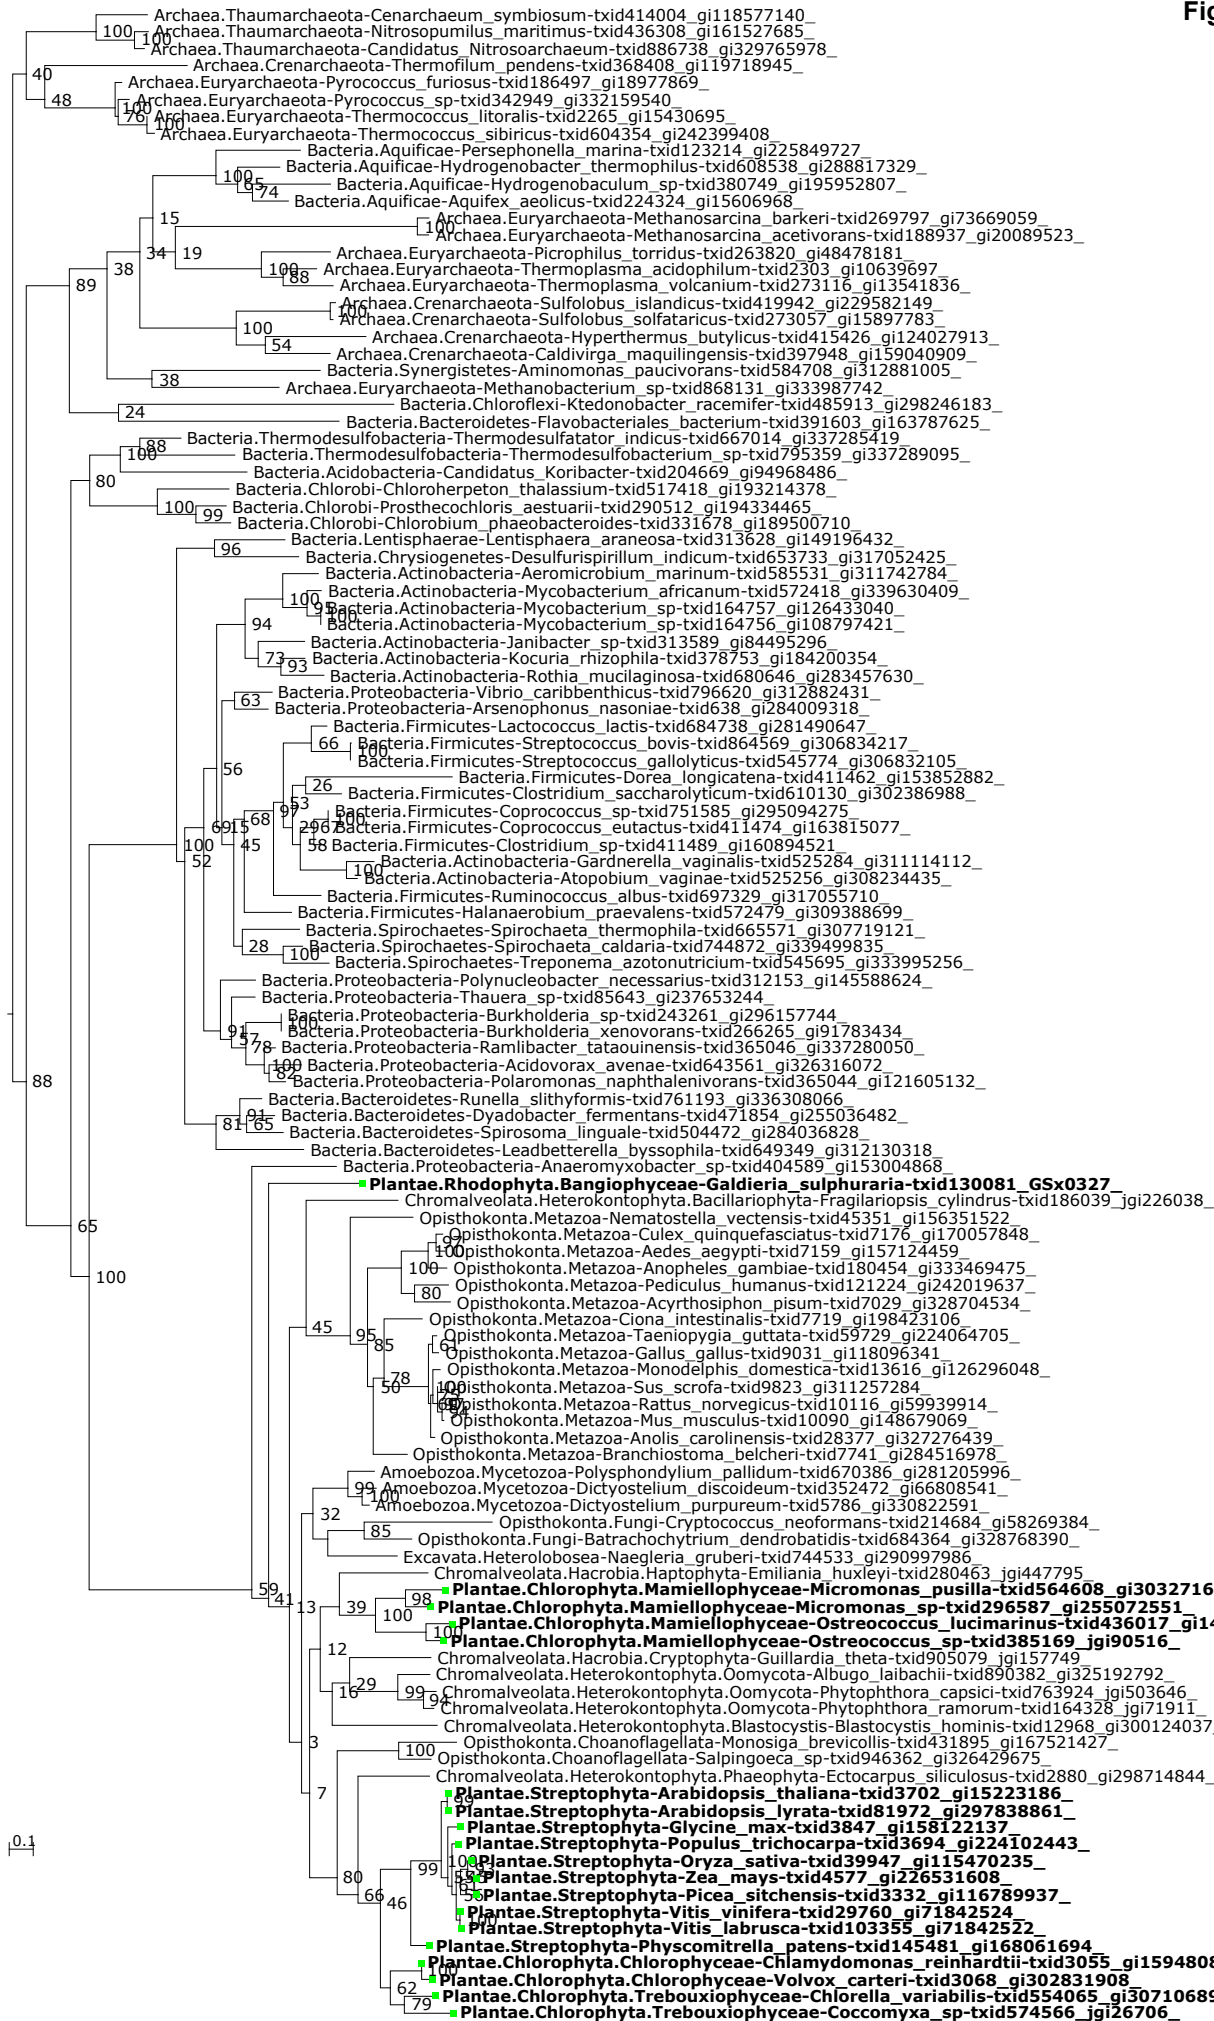

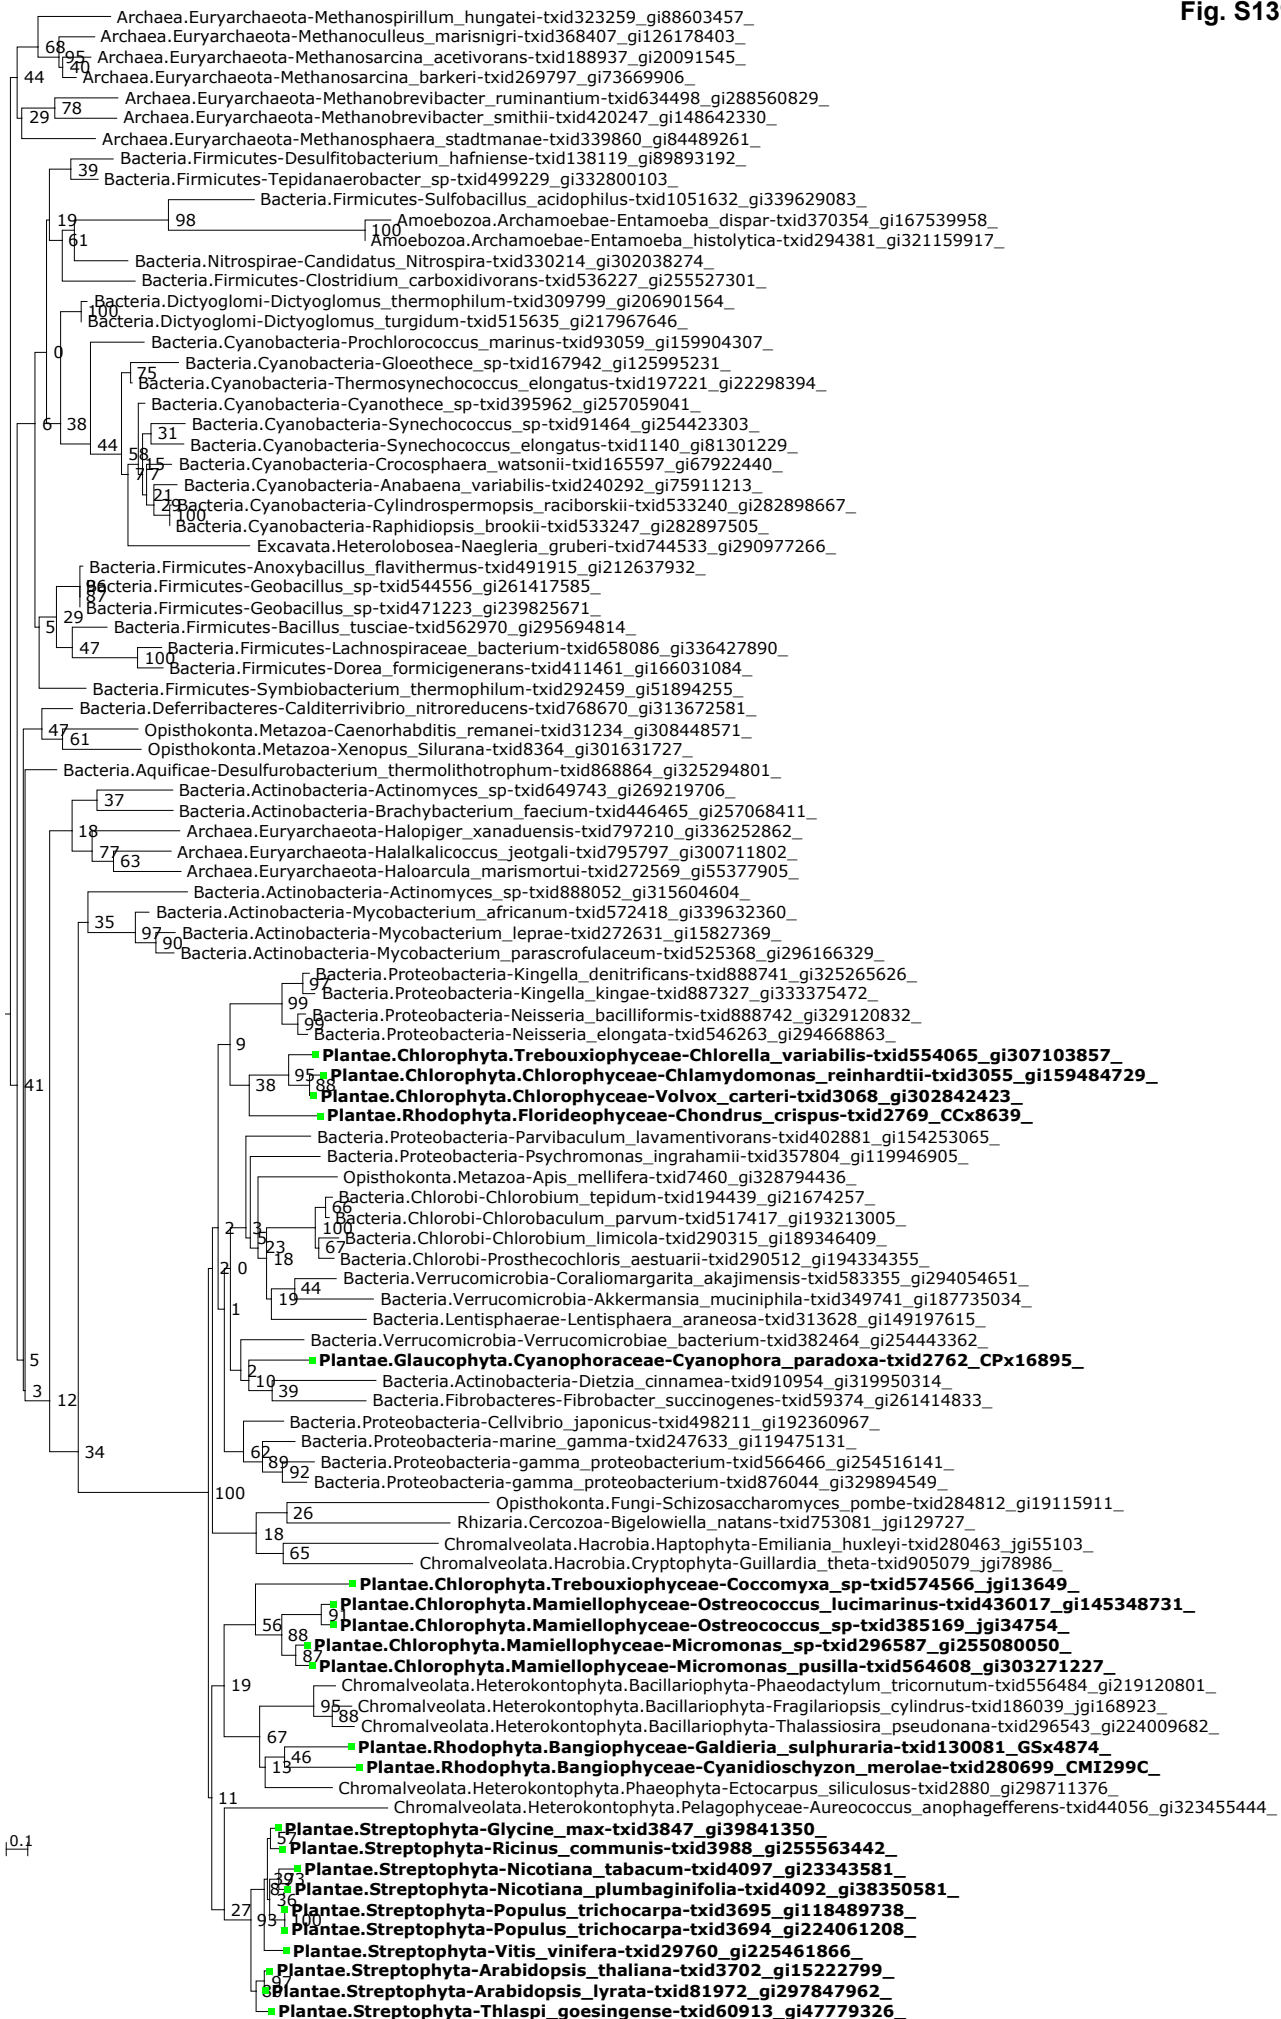

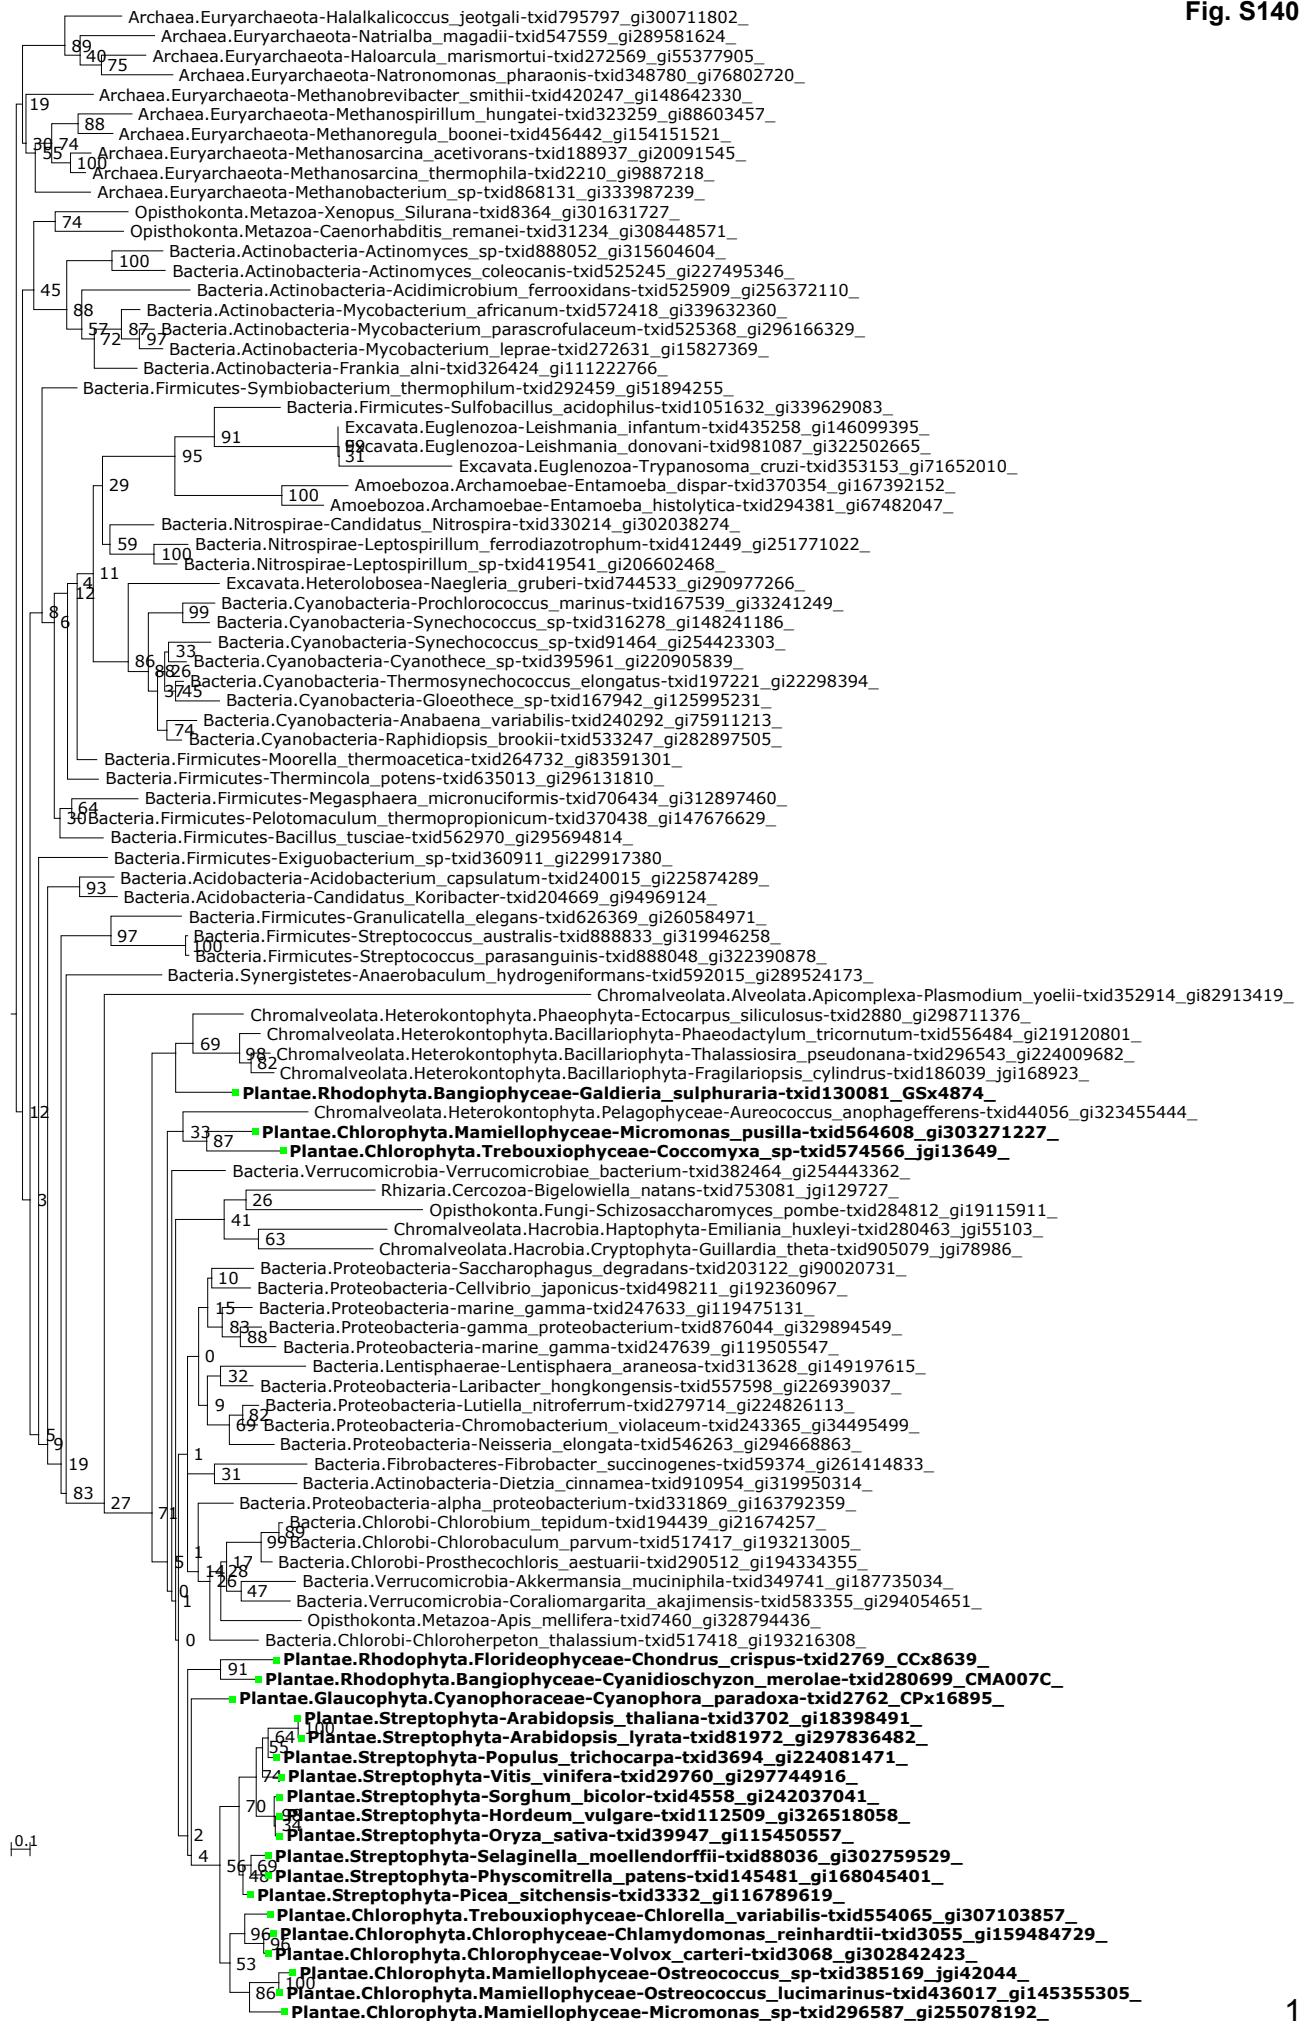

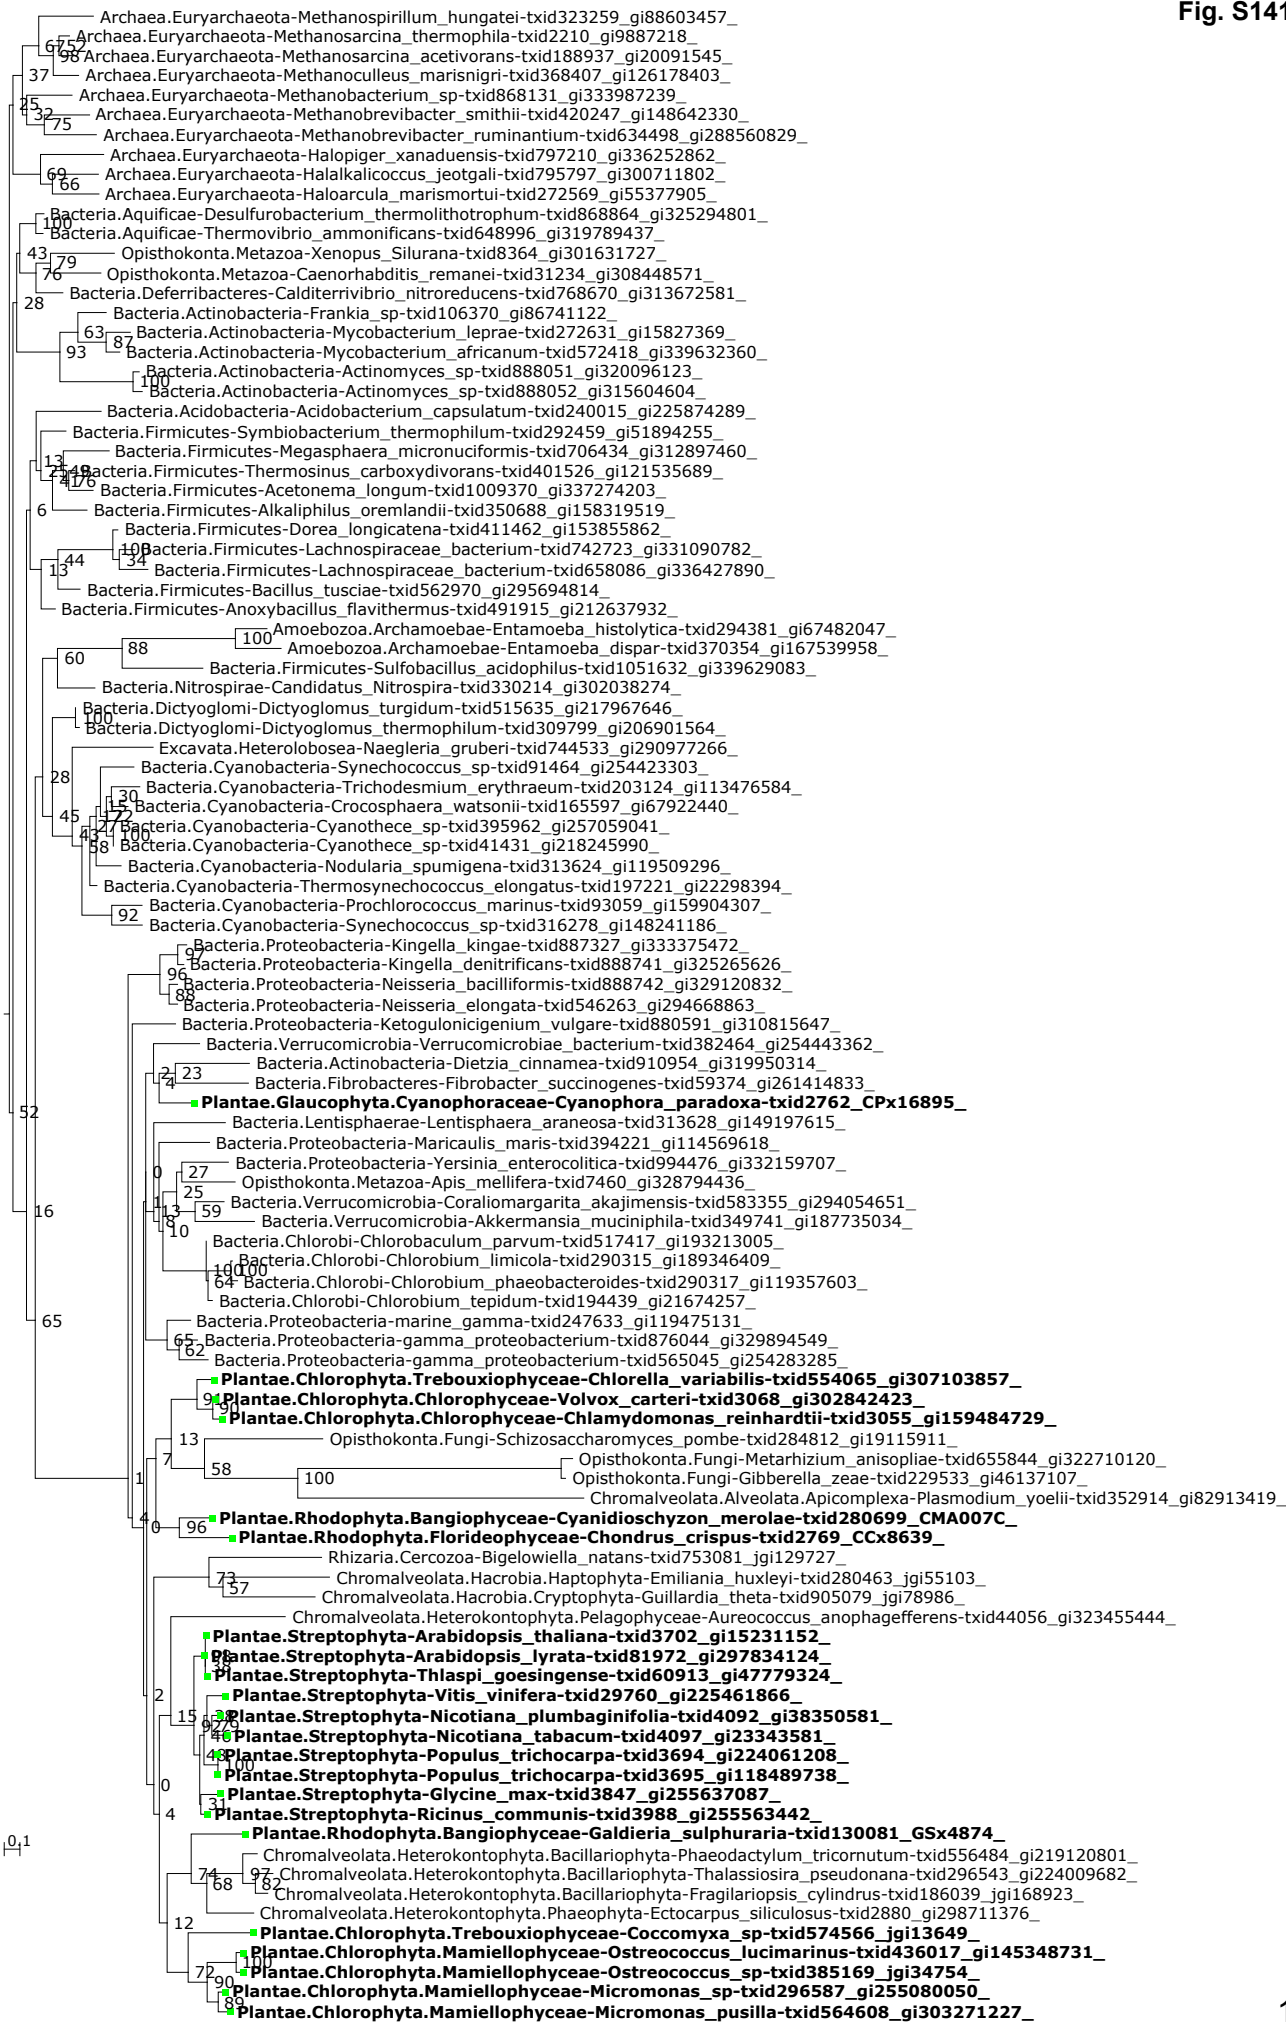

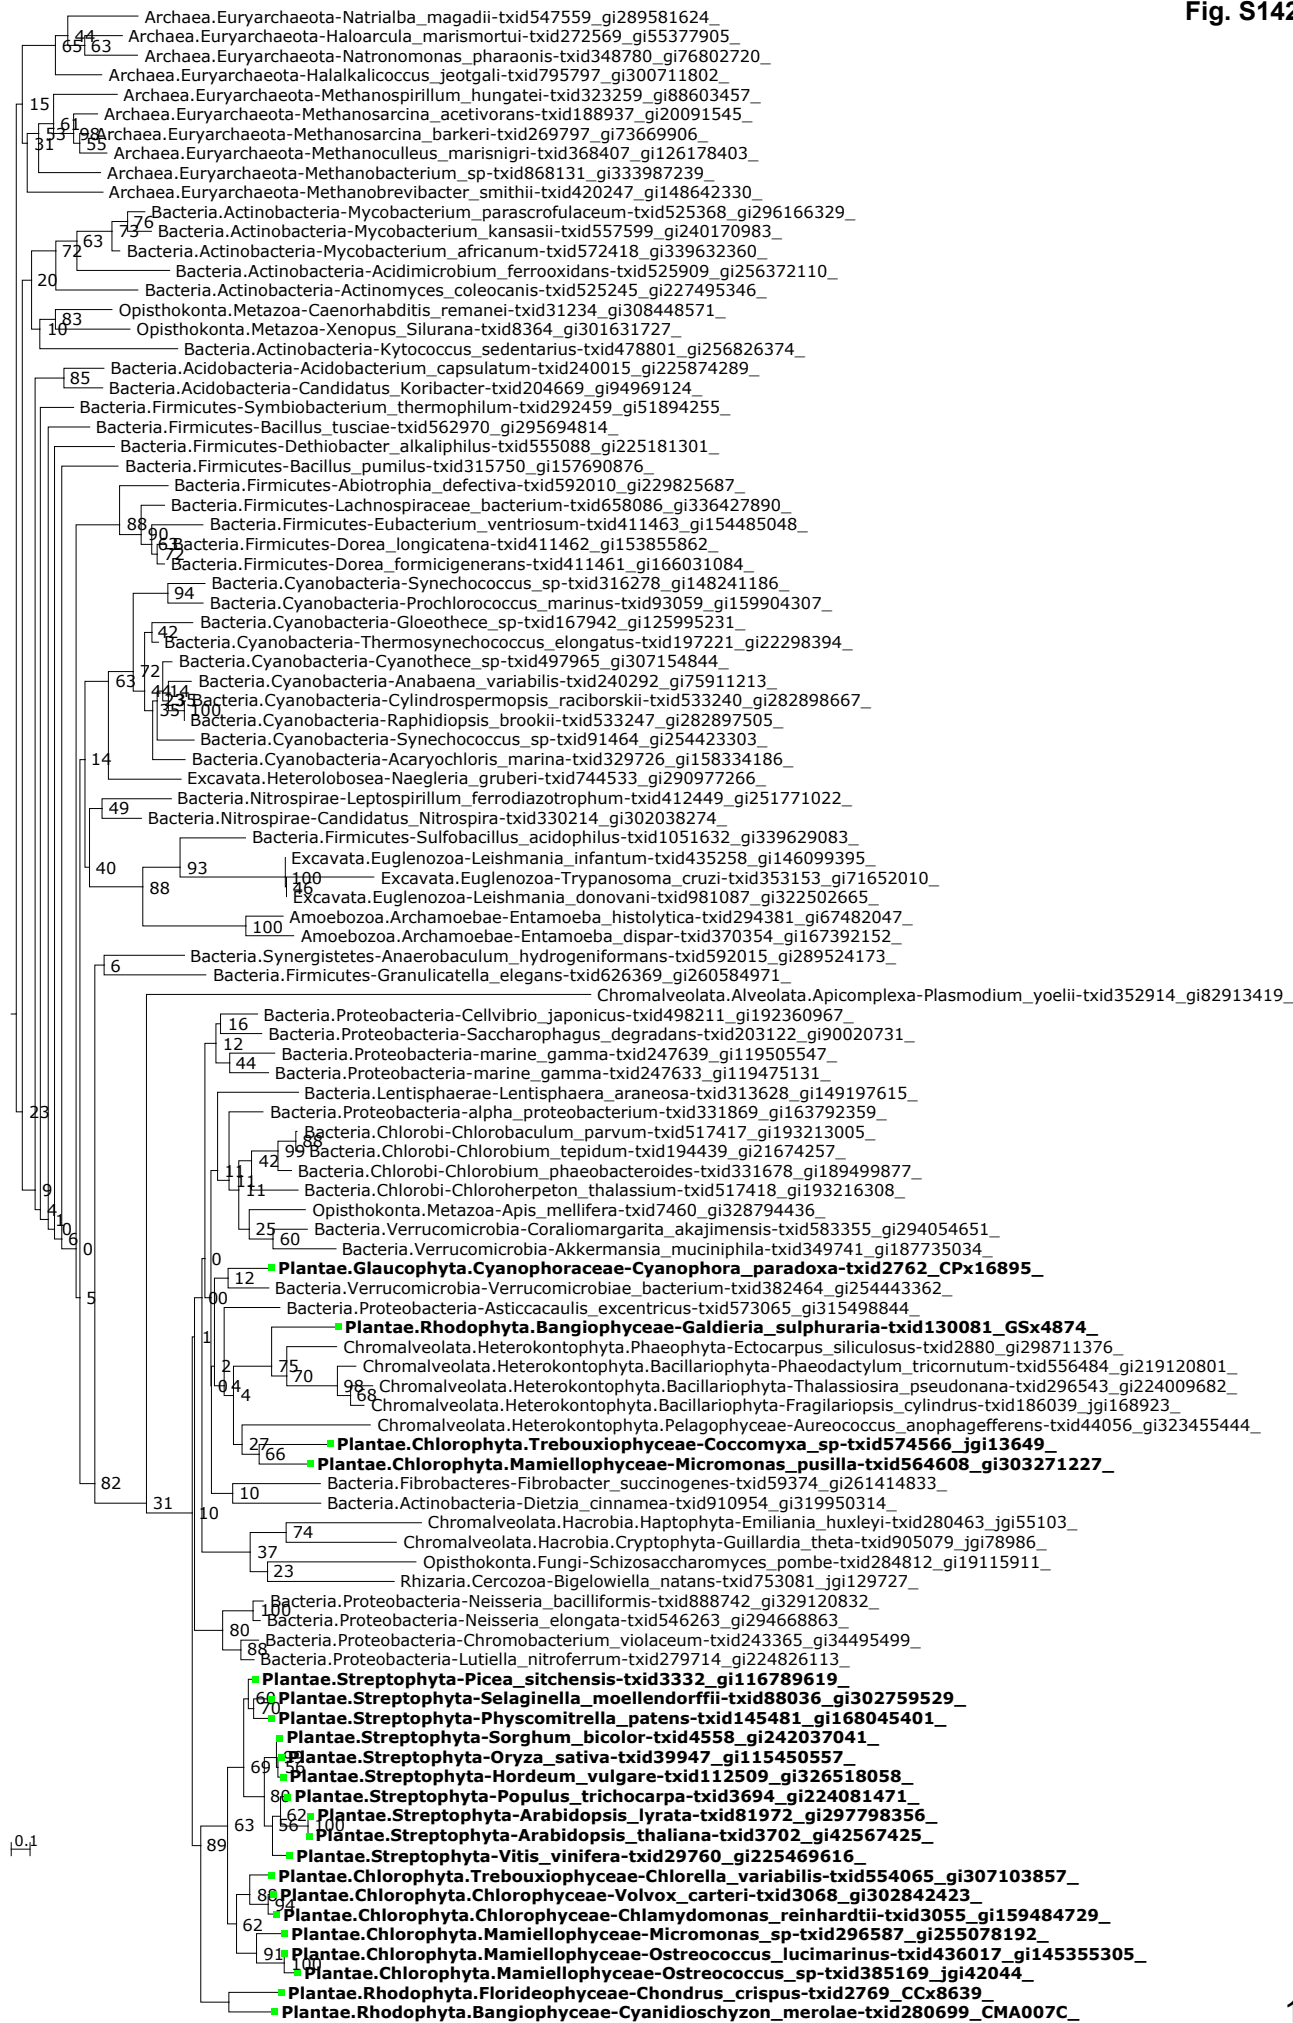



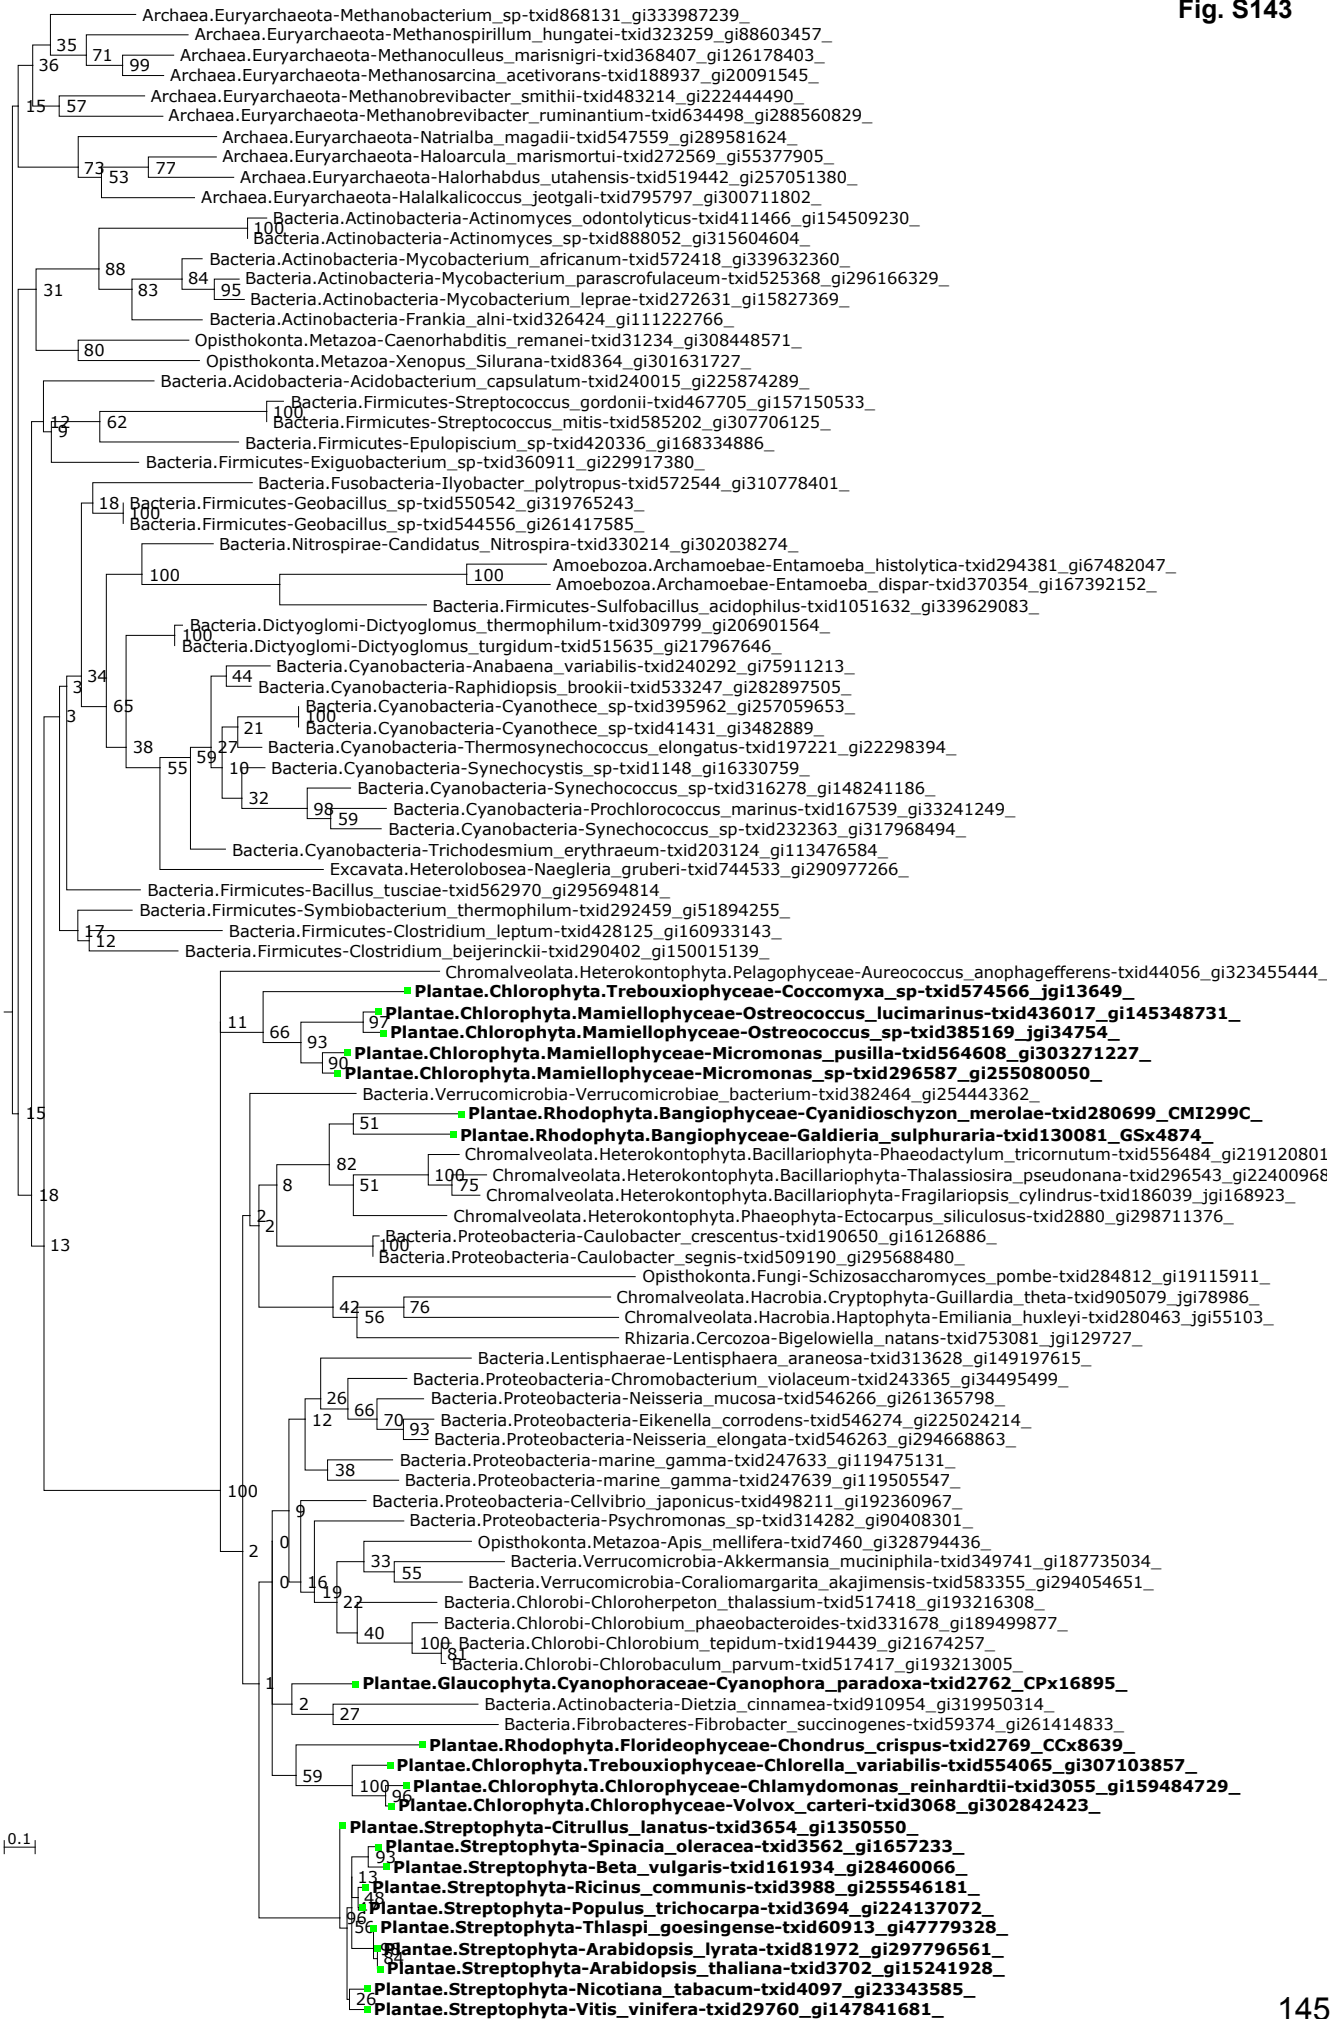

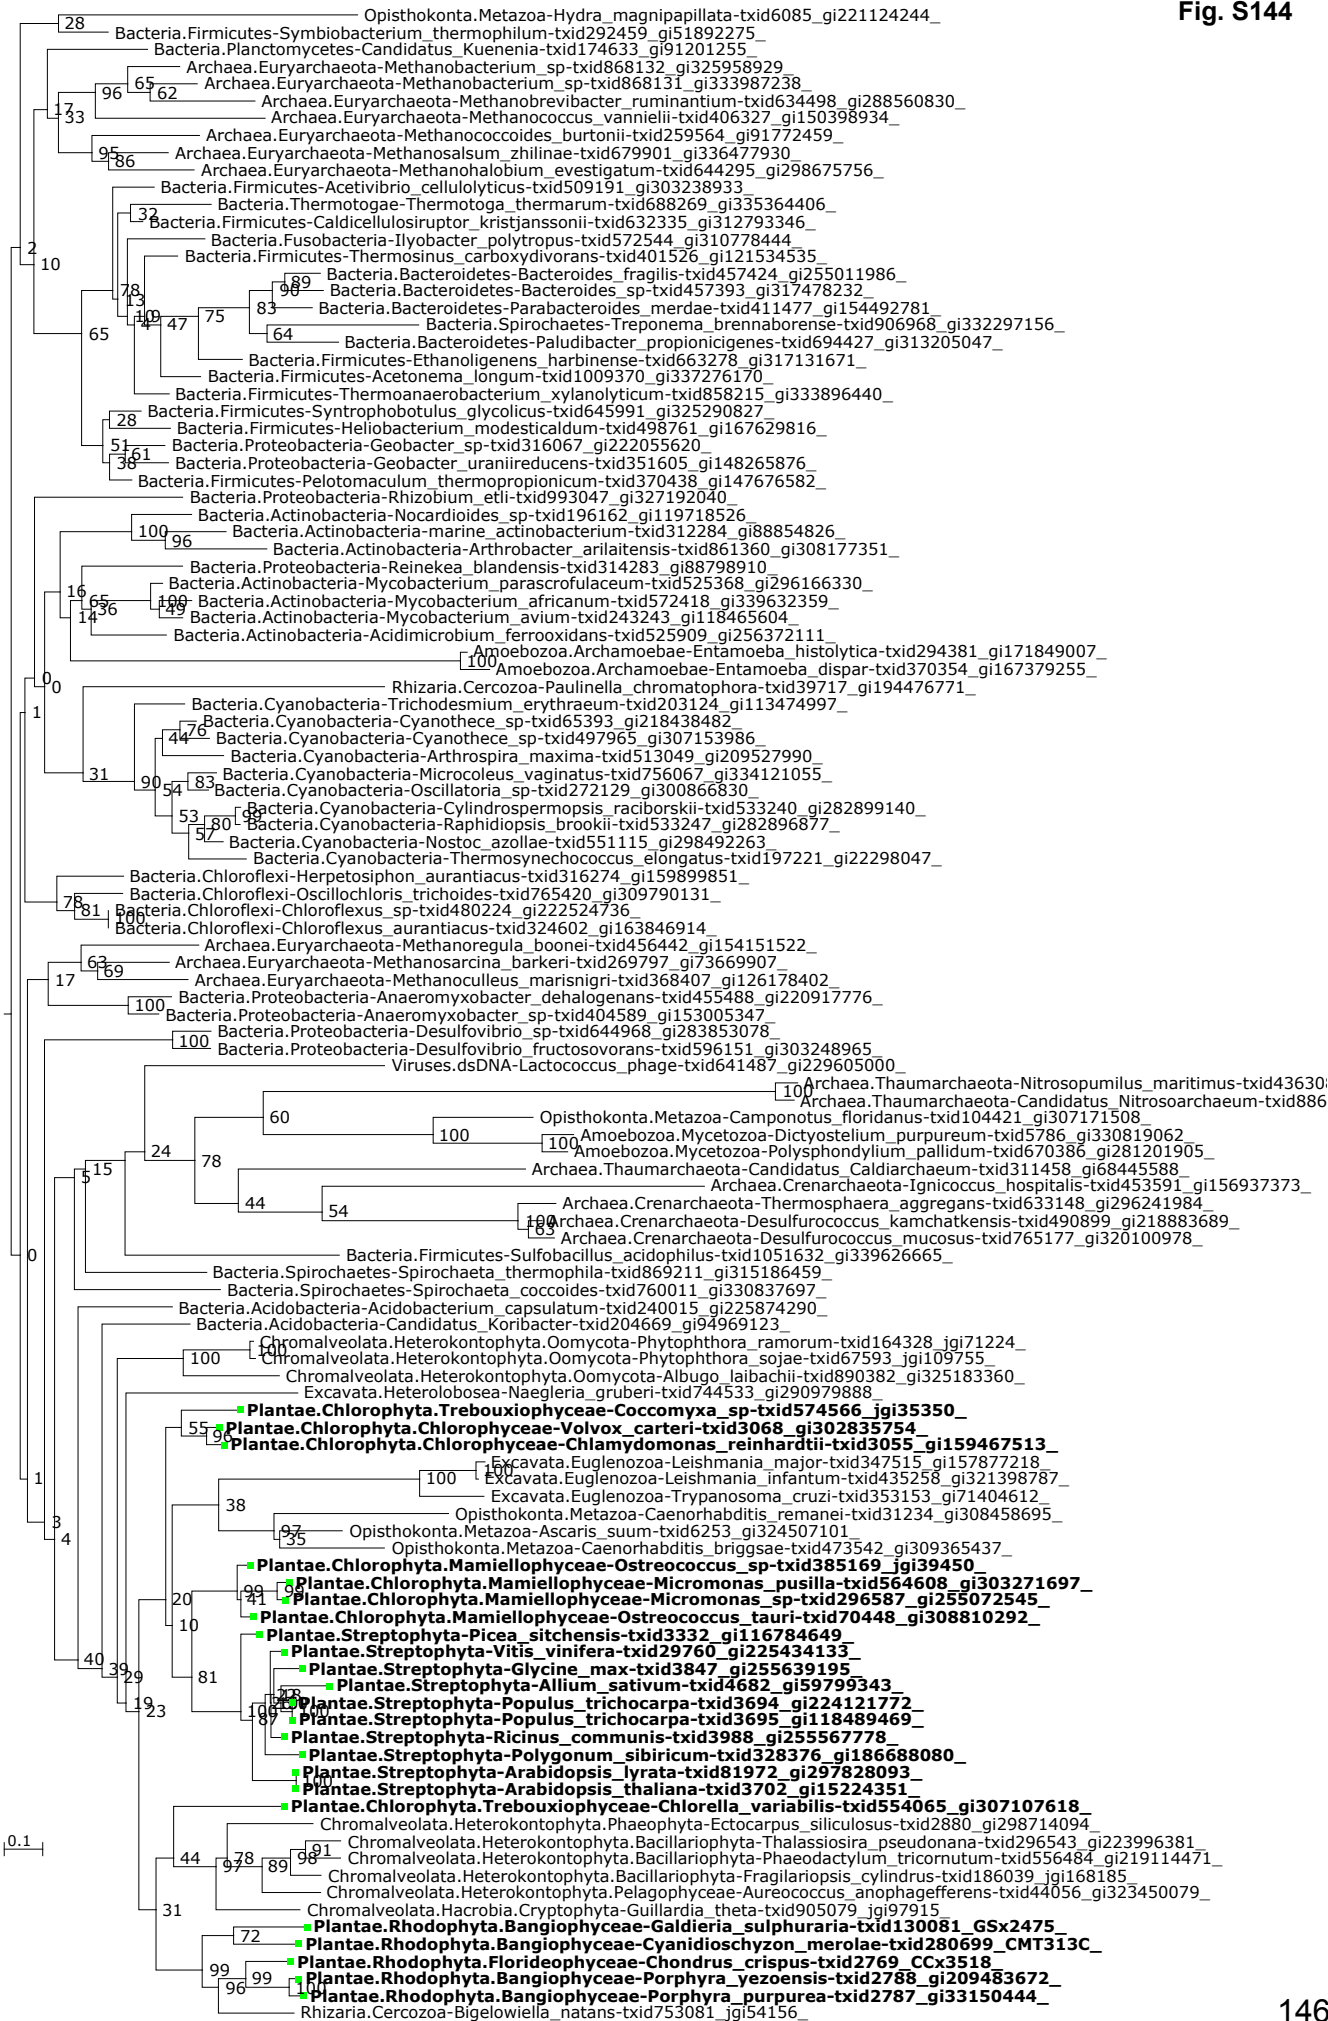

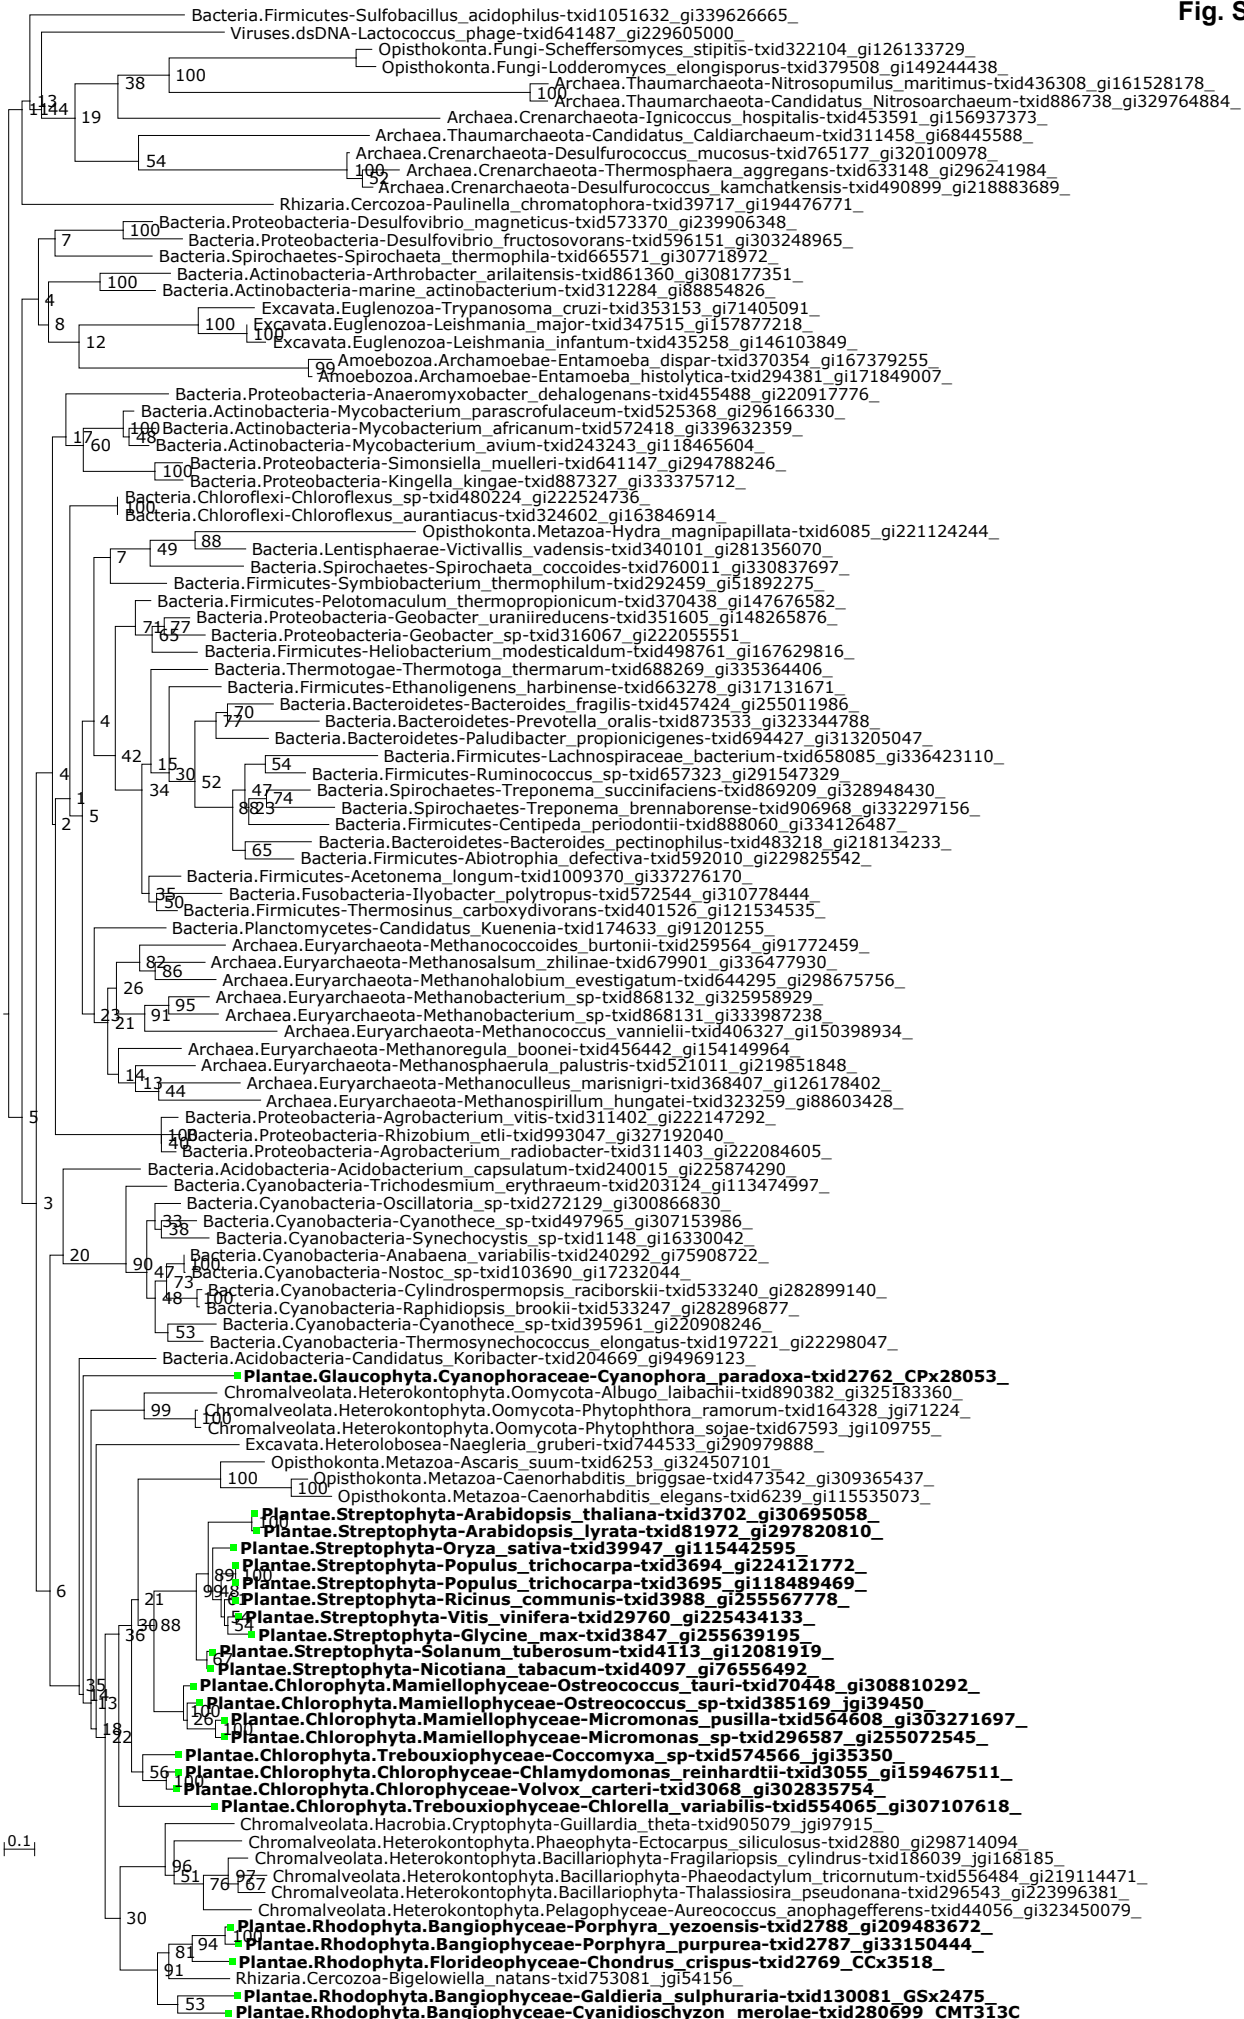

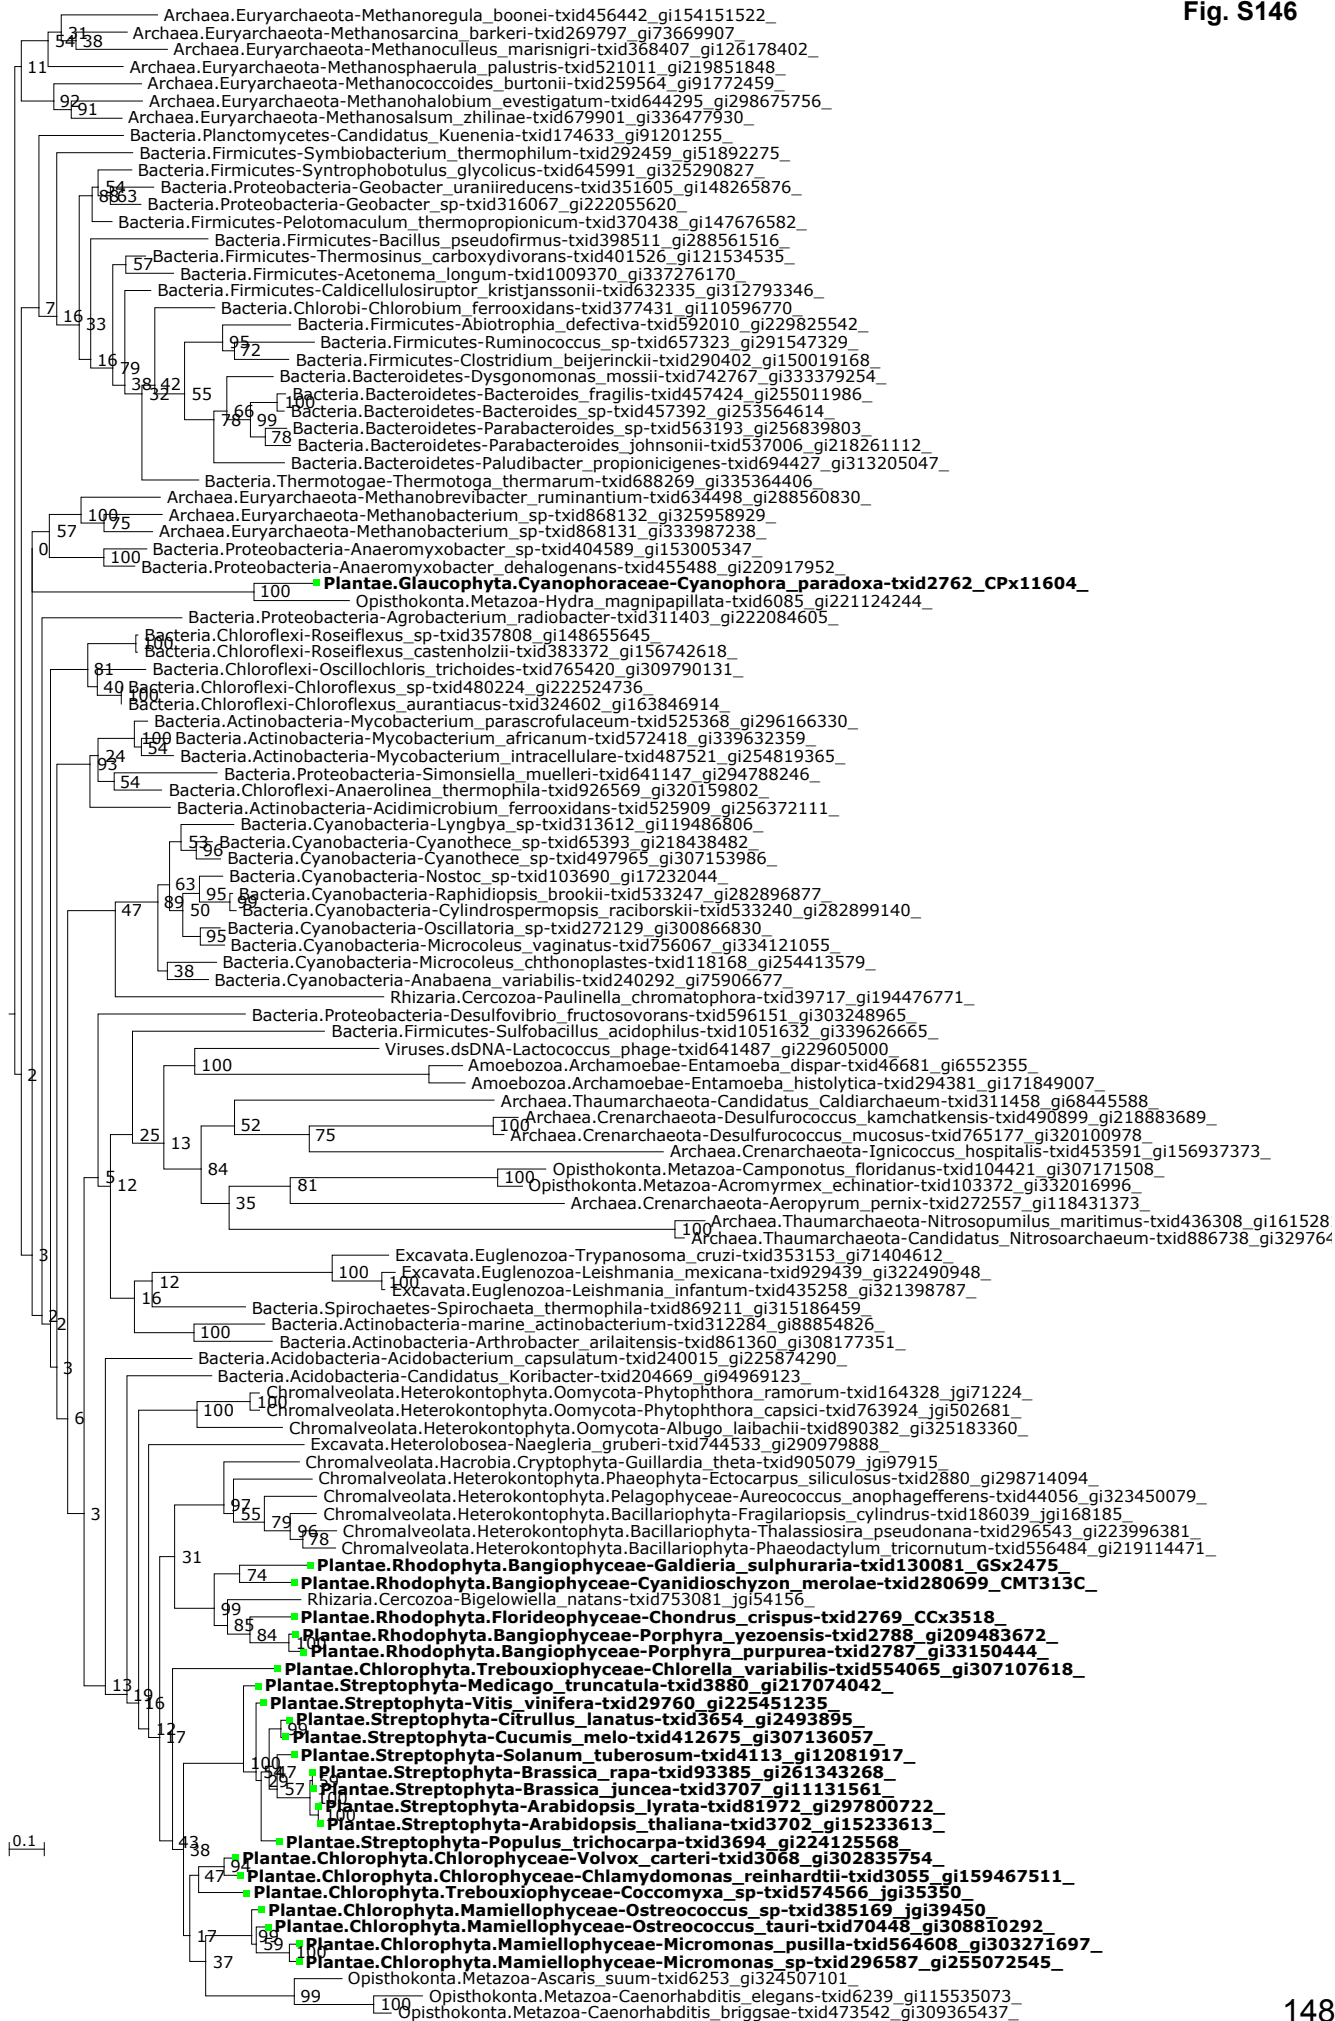

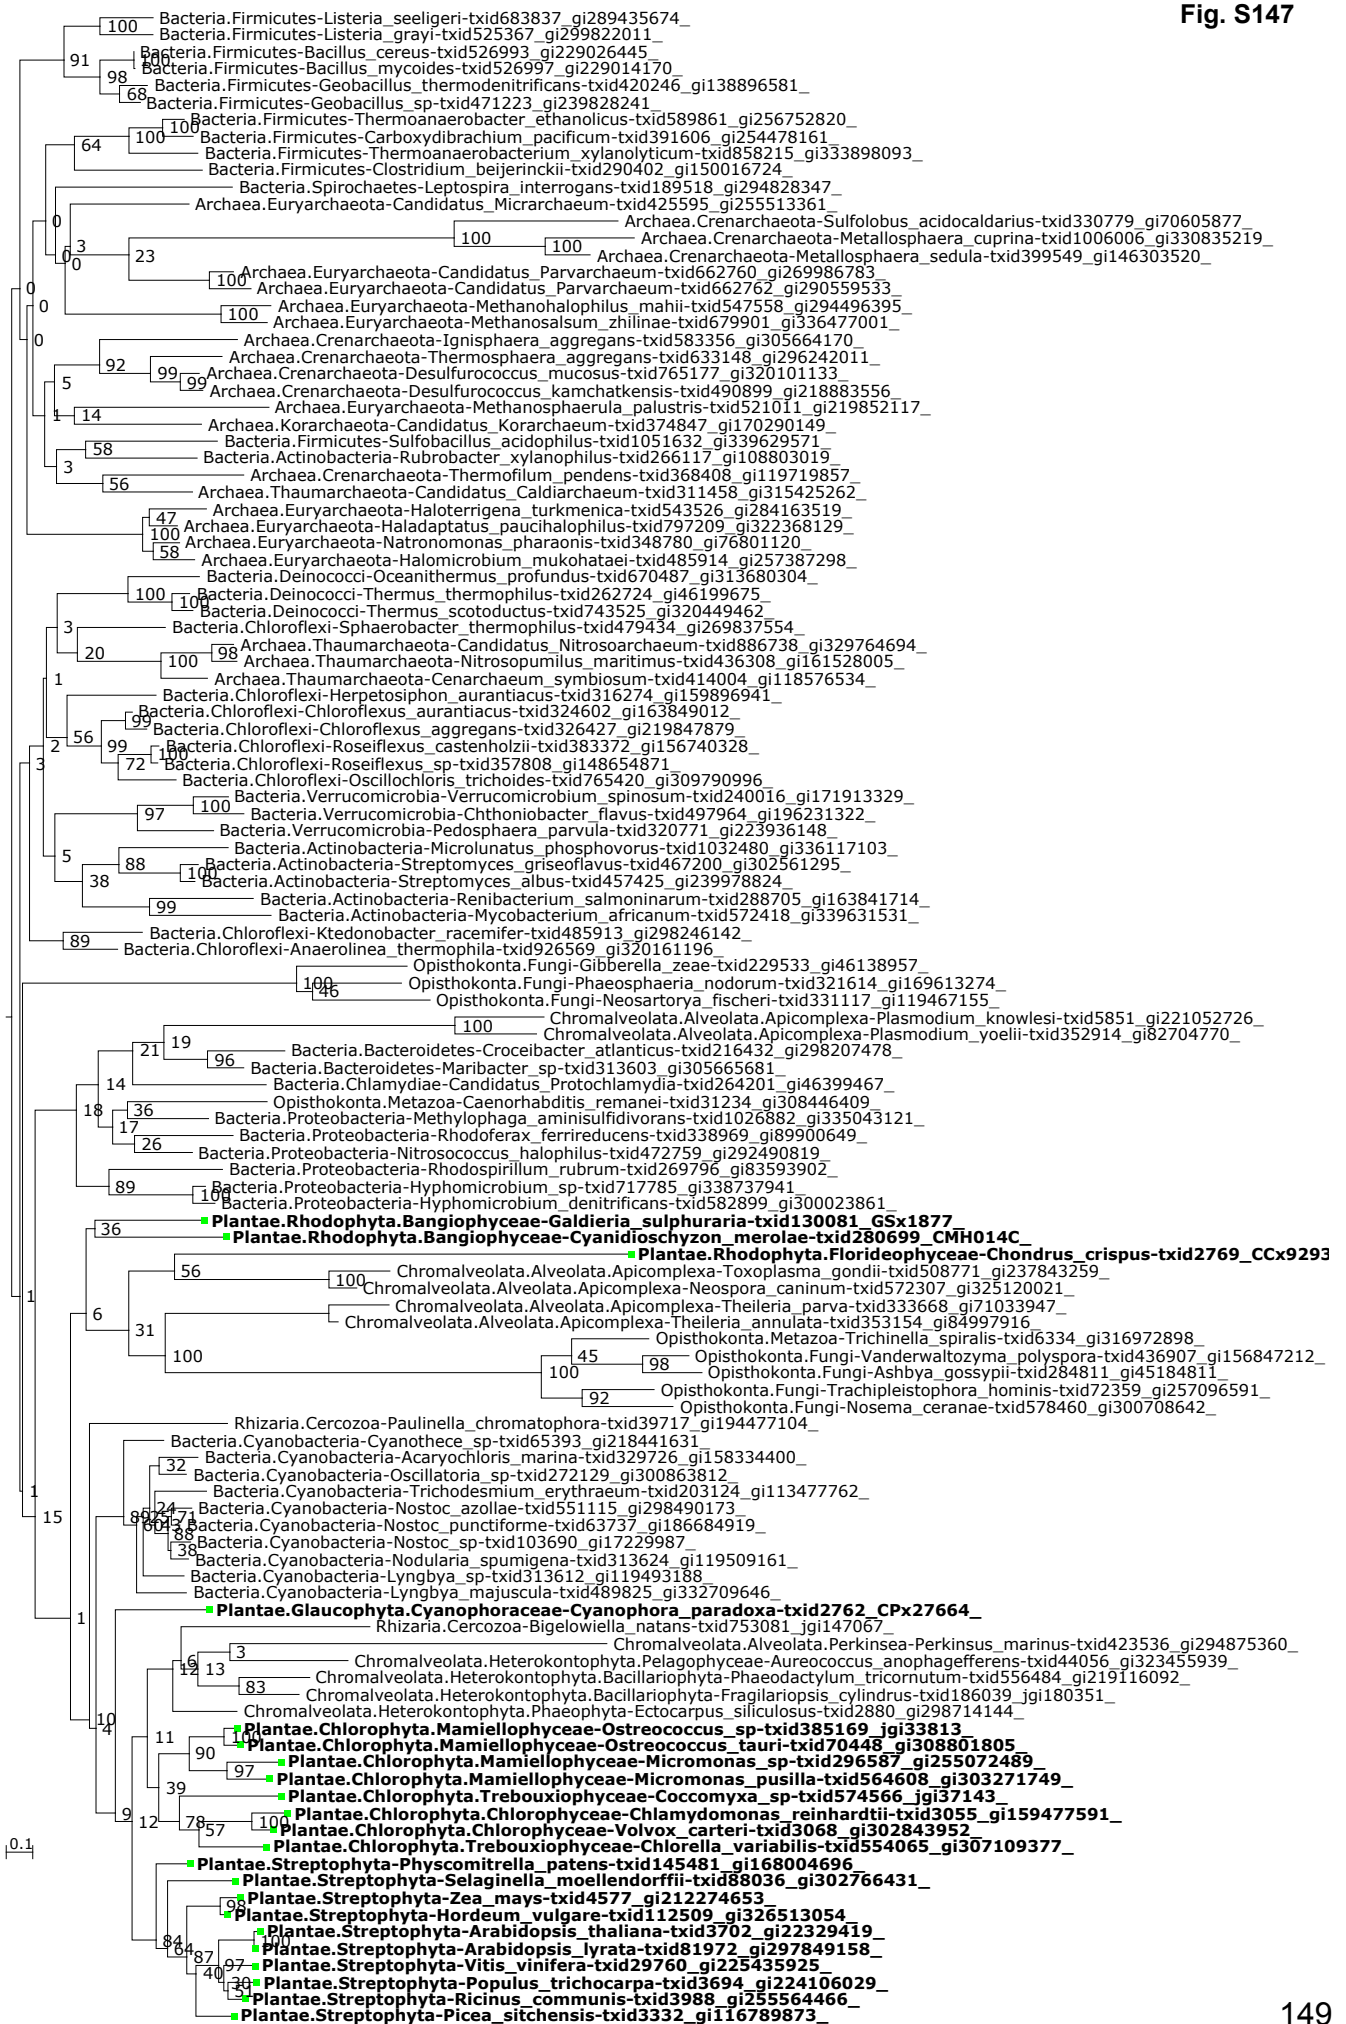



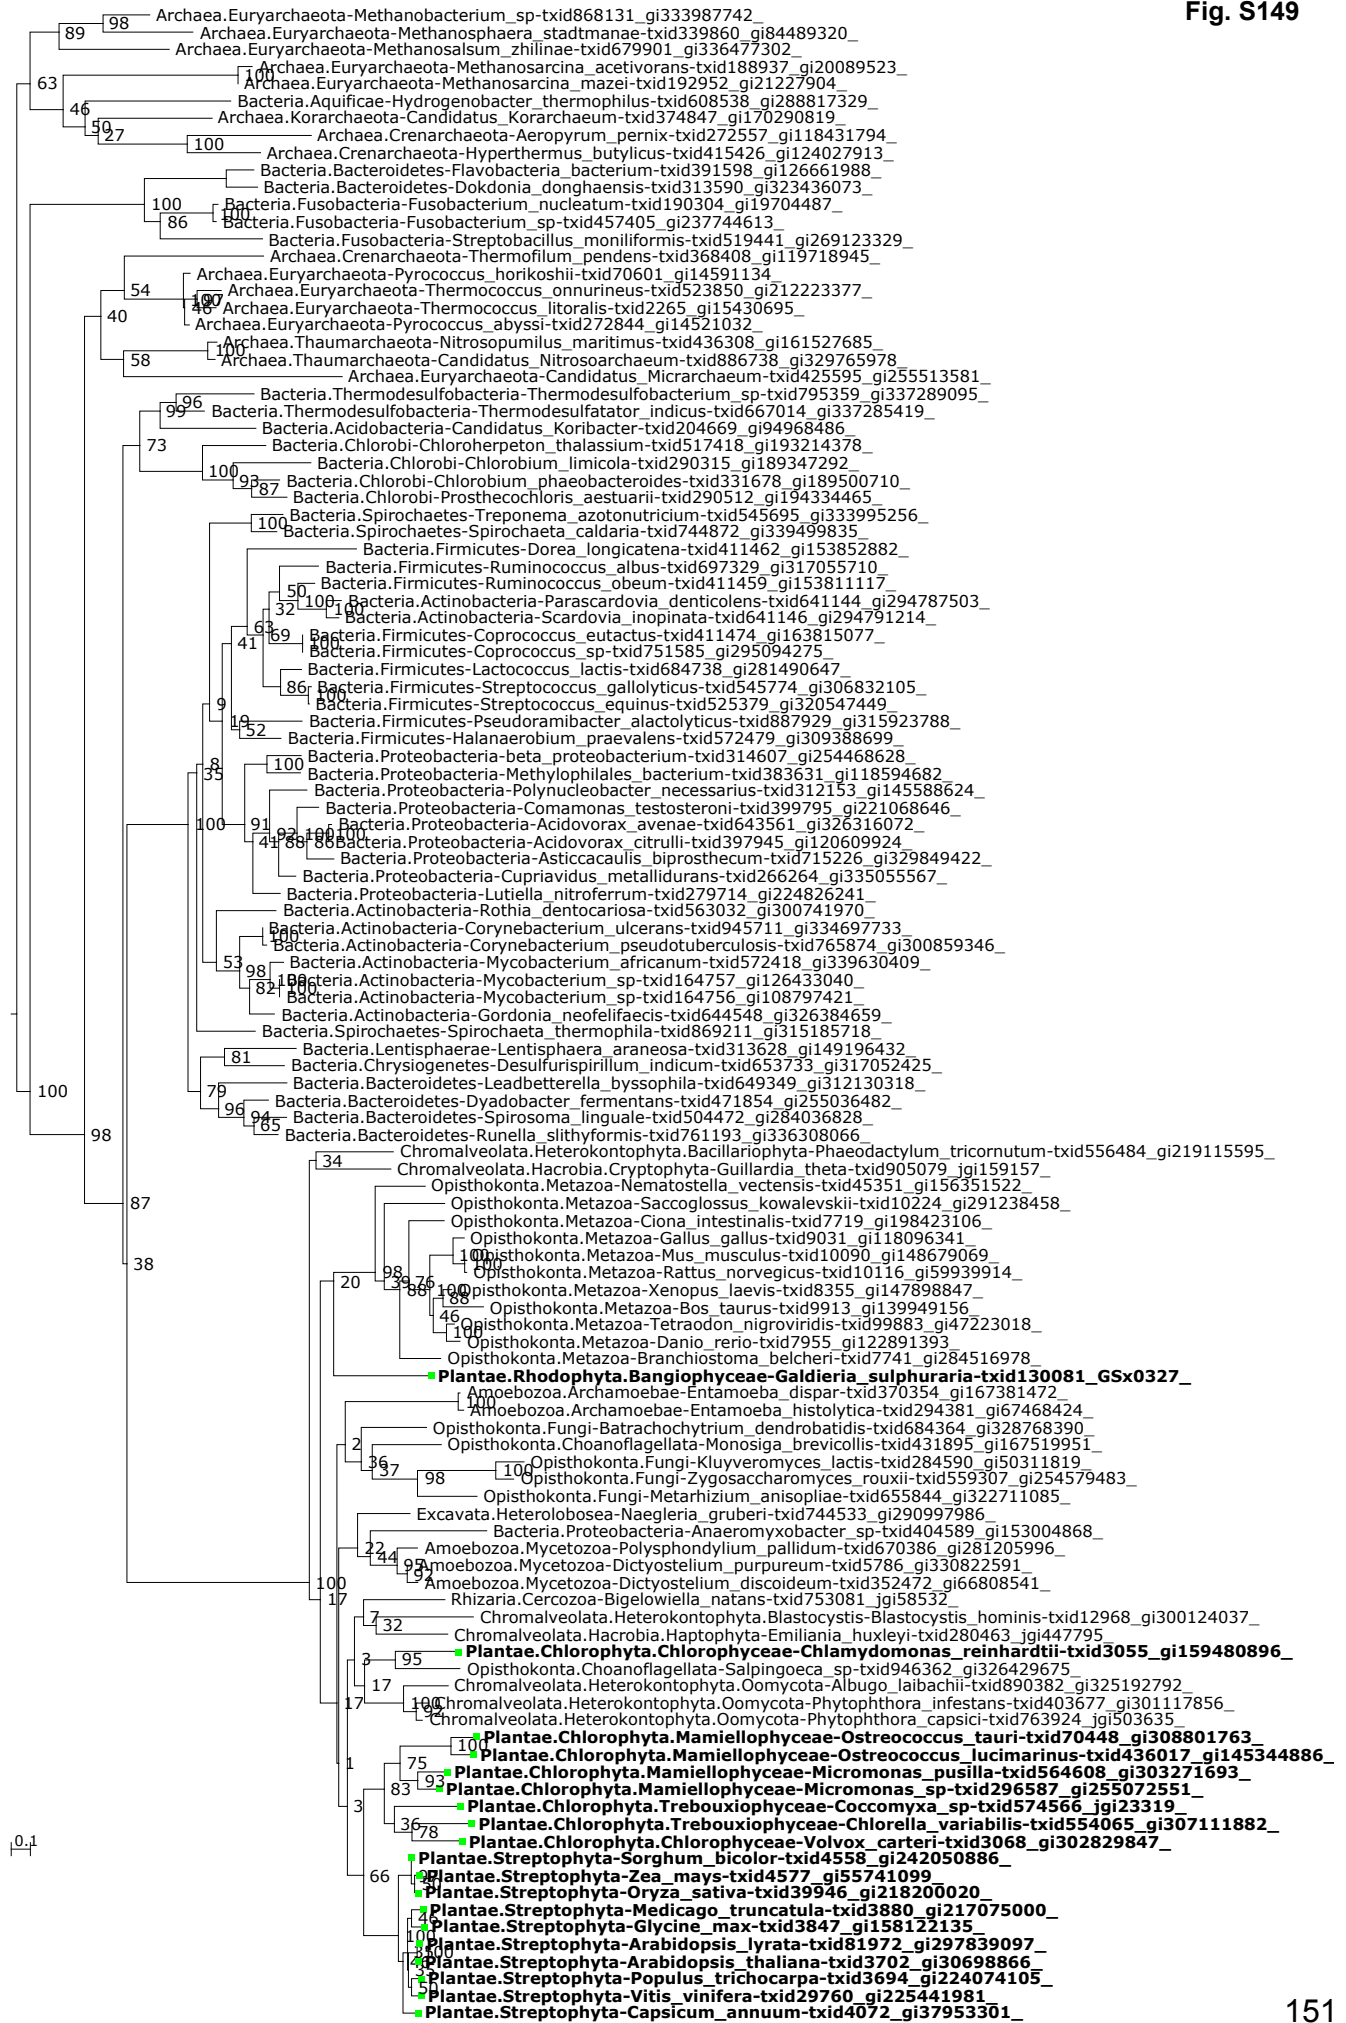

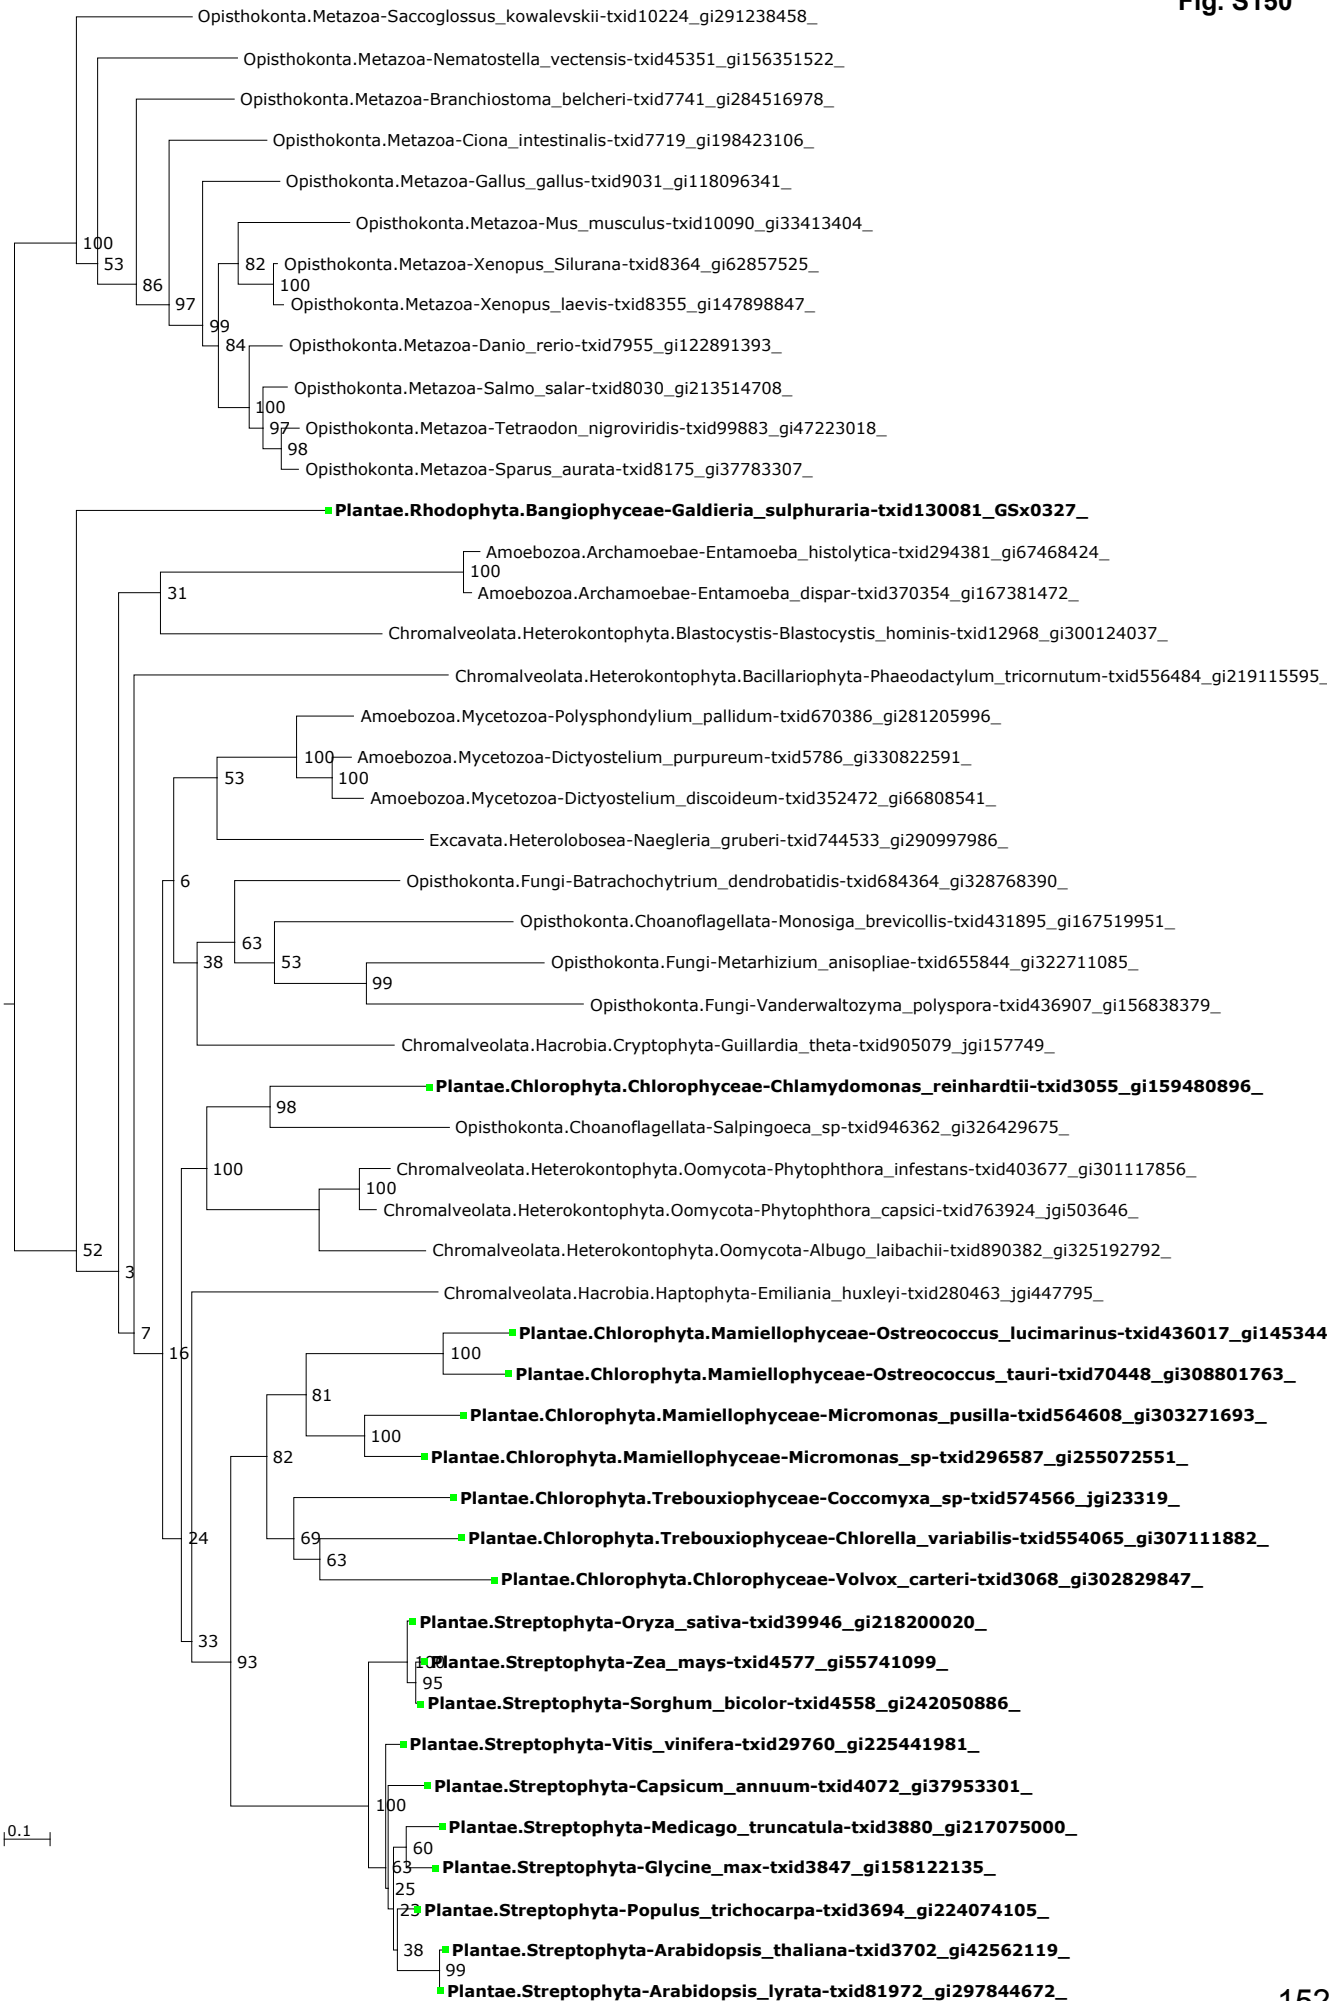



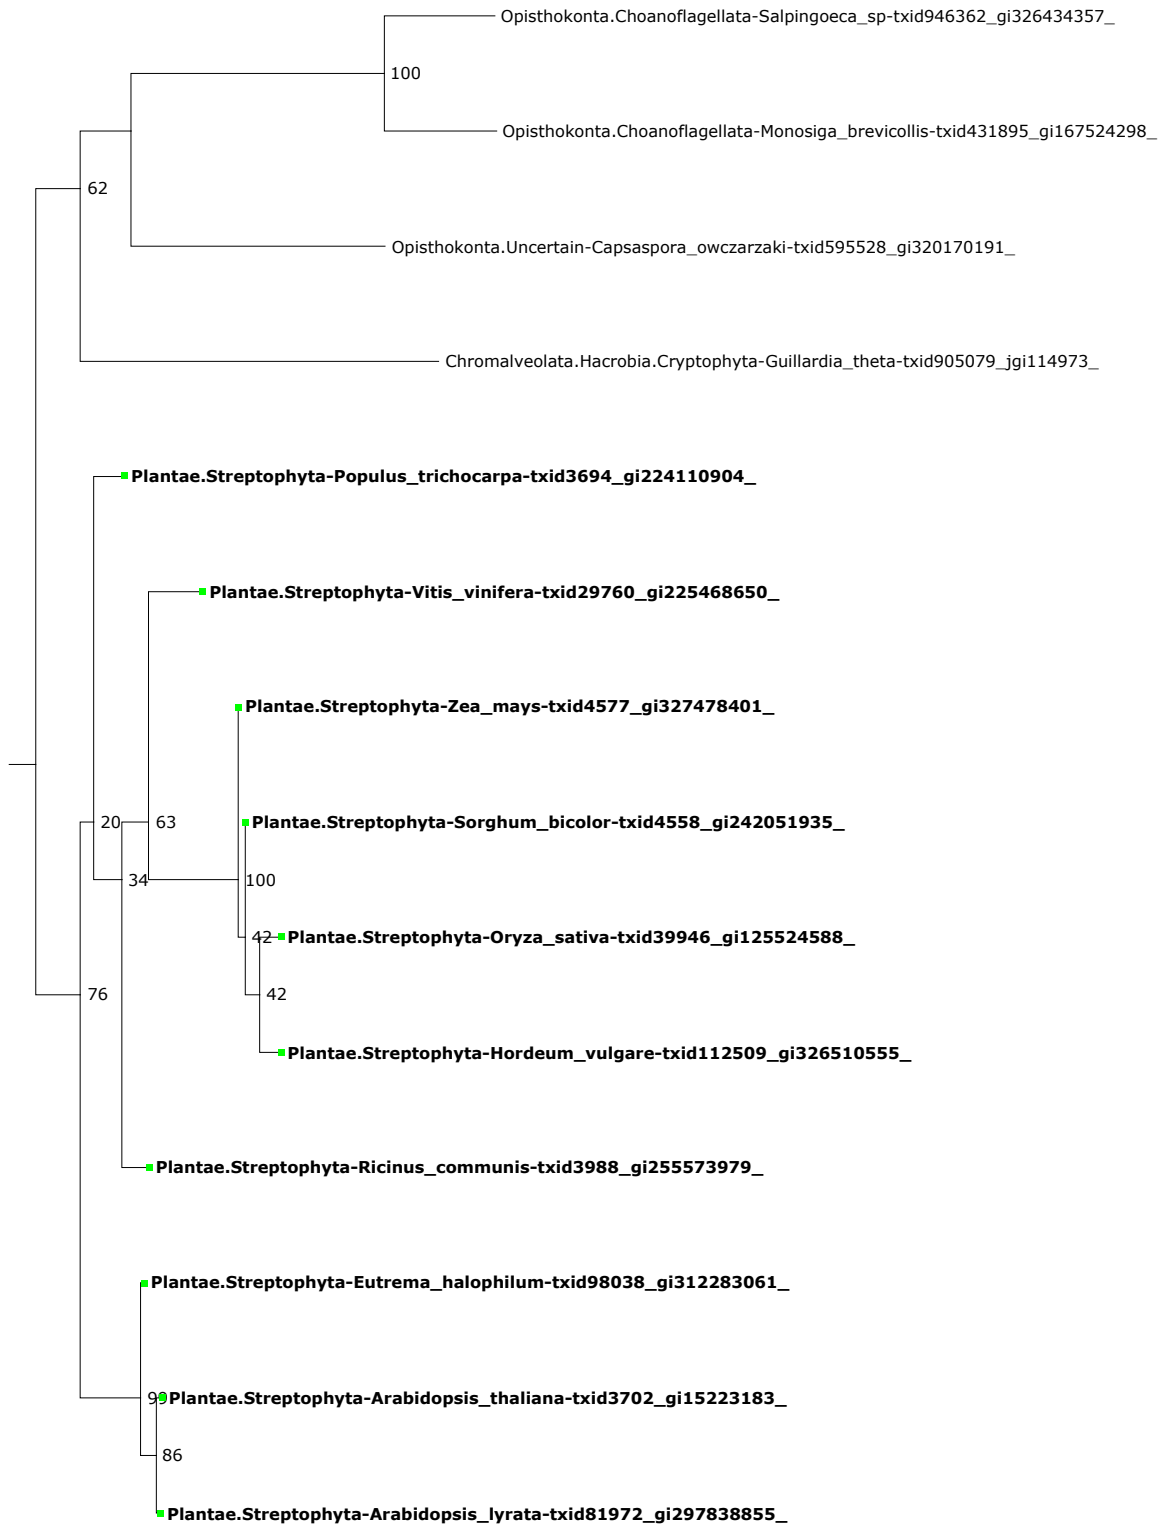

0.1

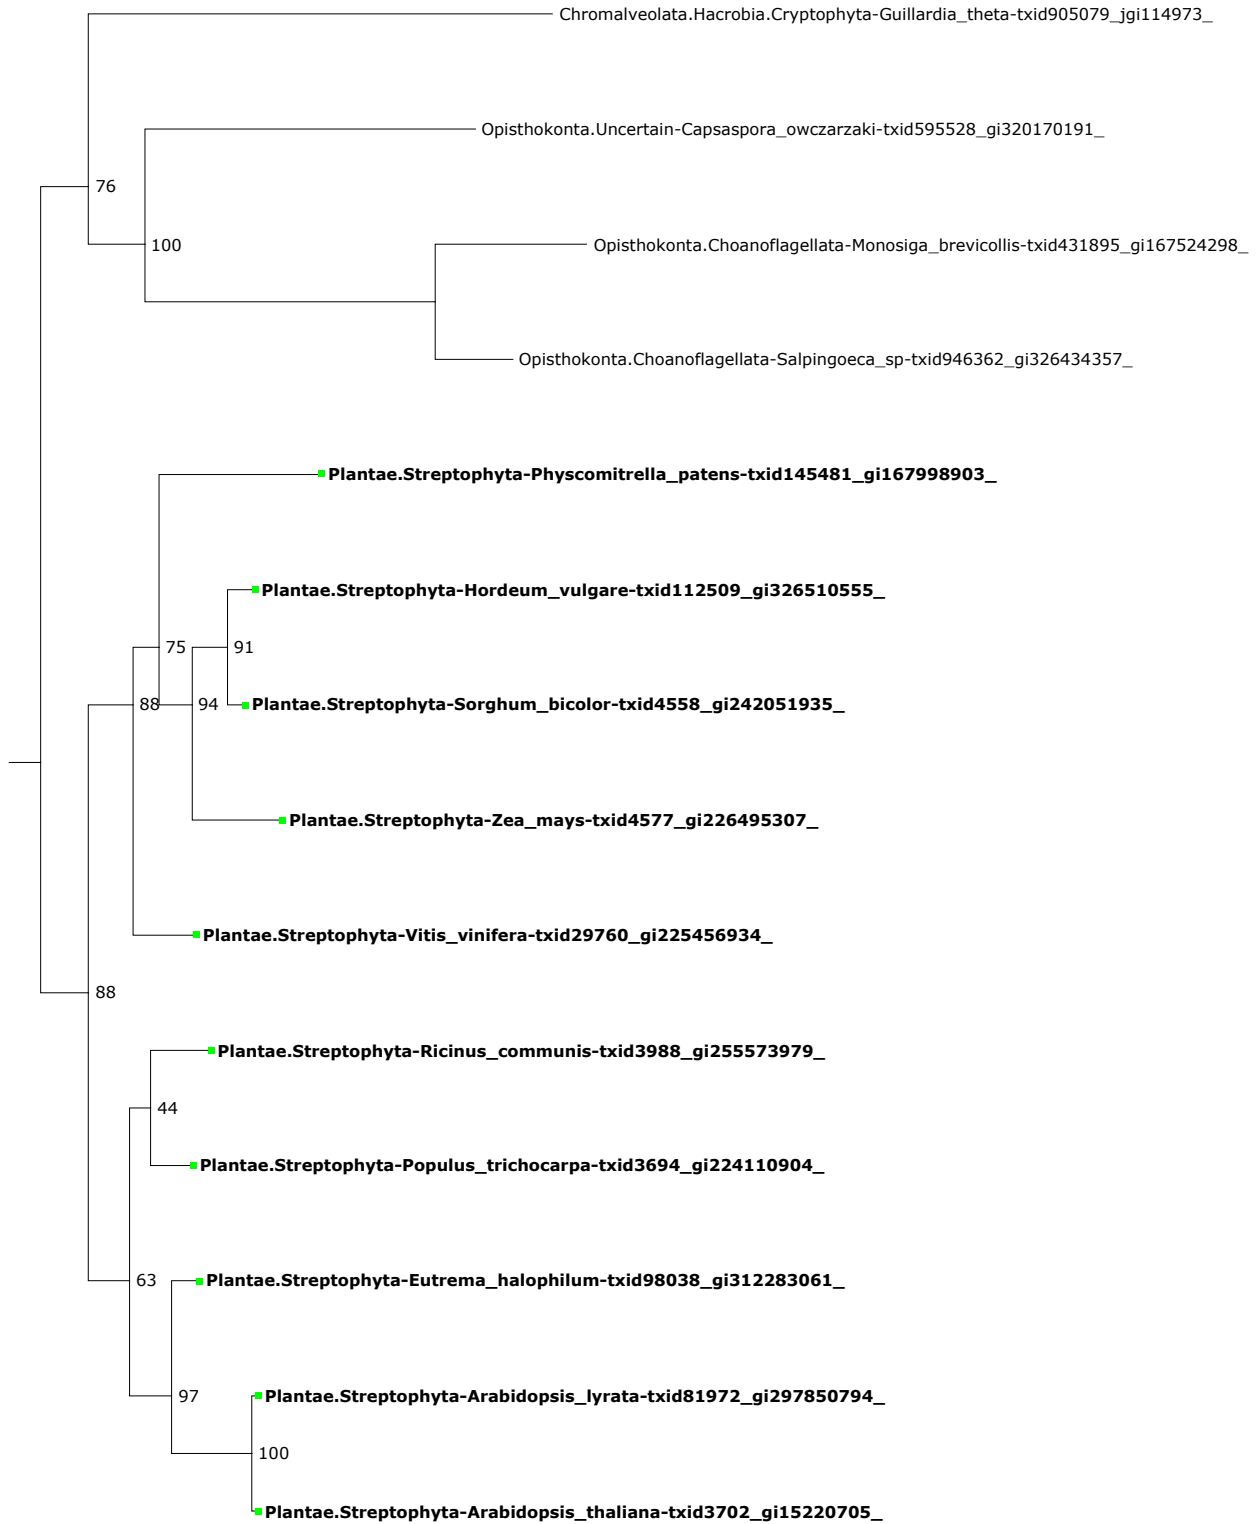

0.1

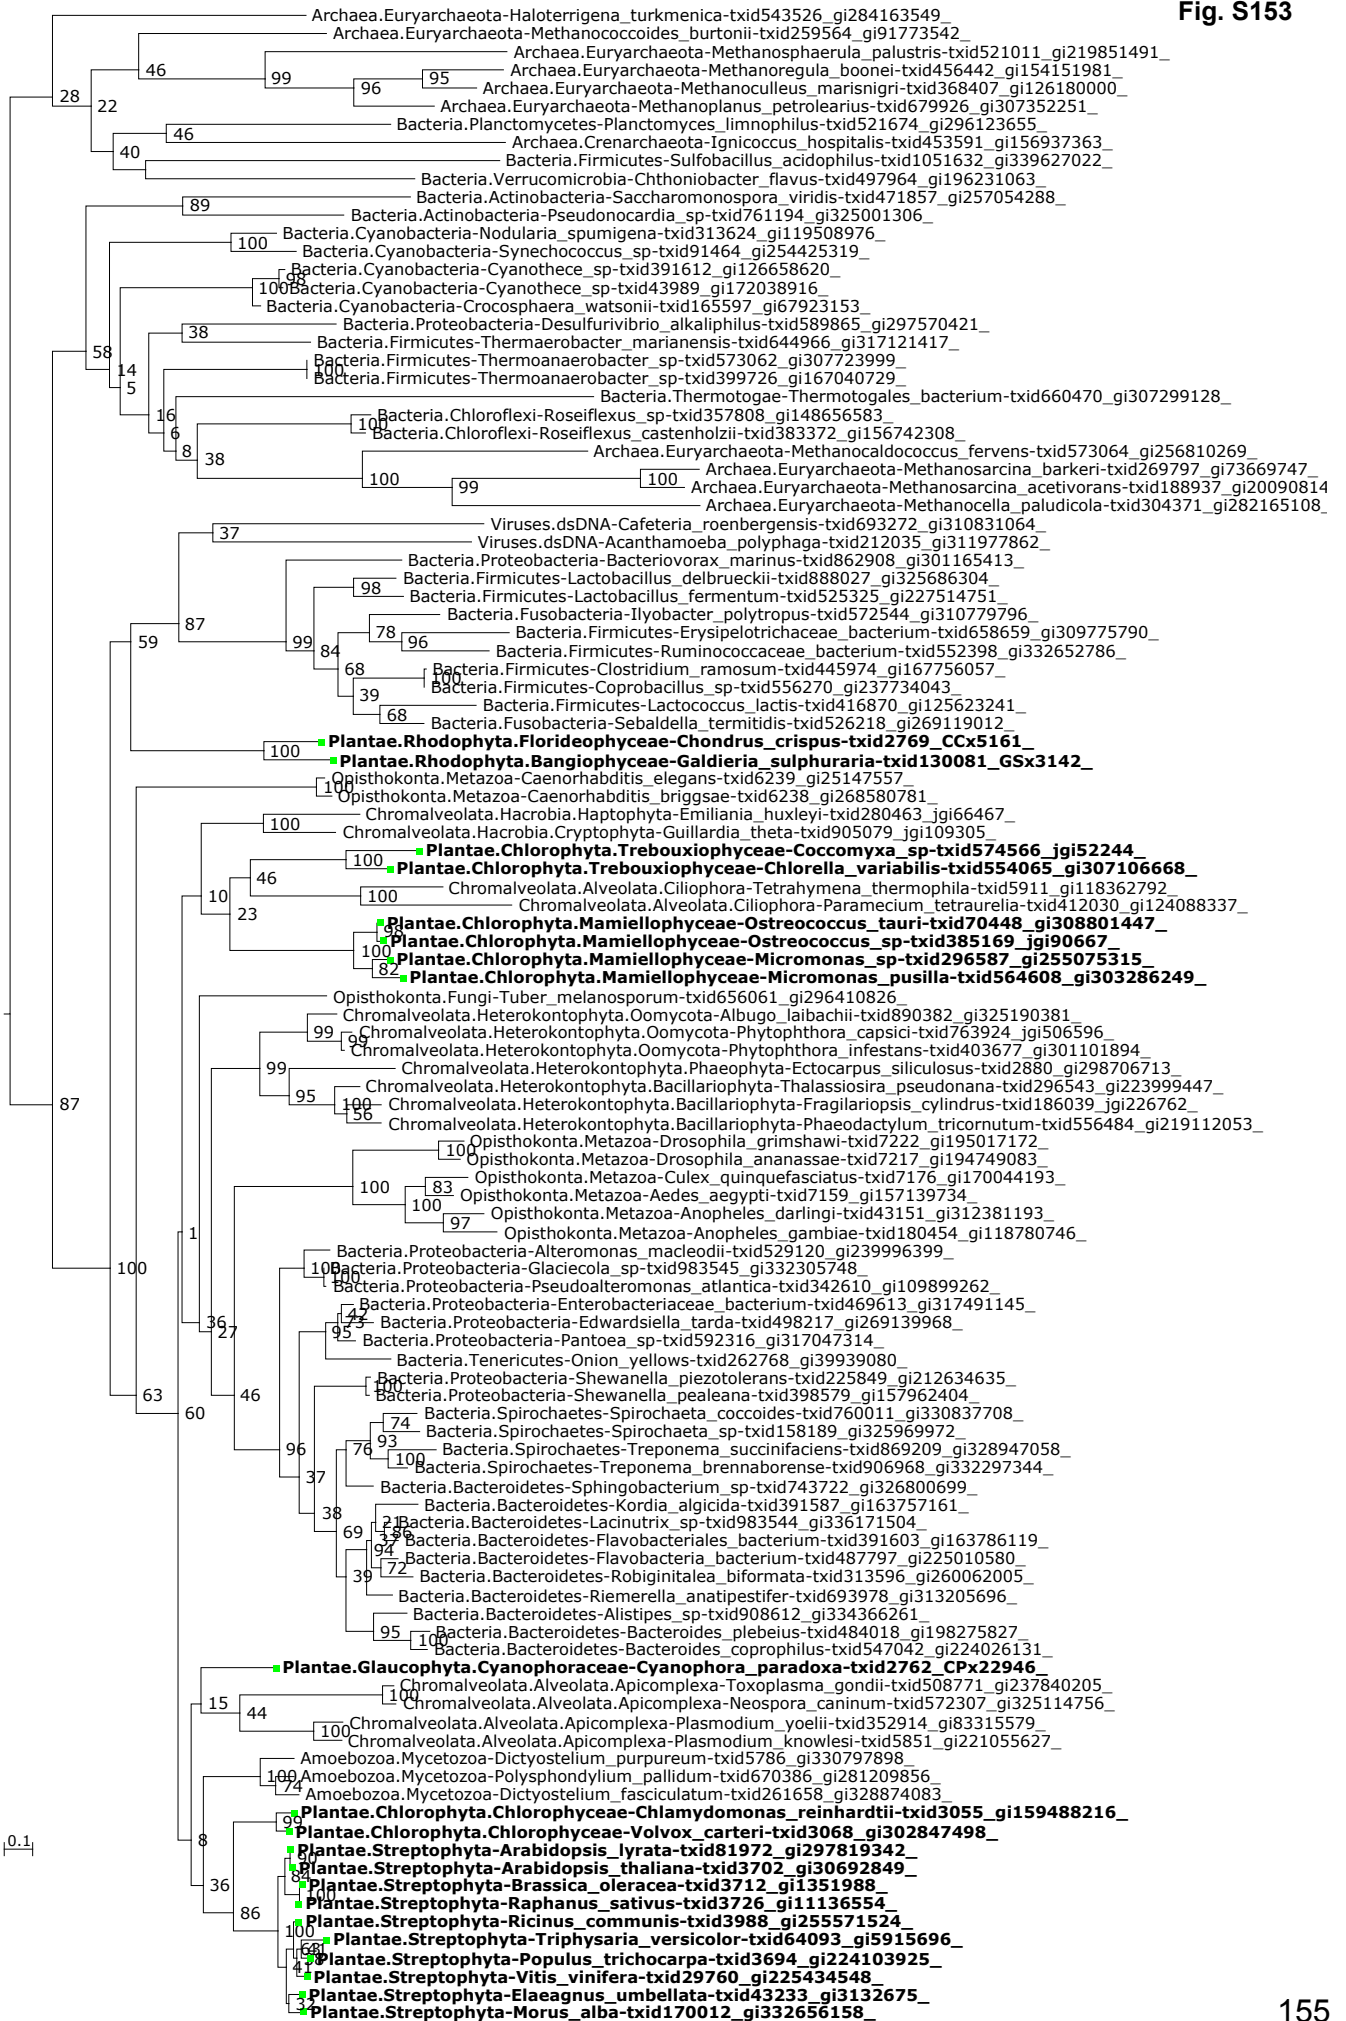

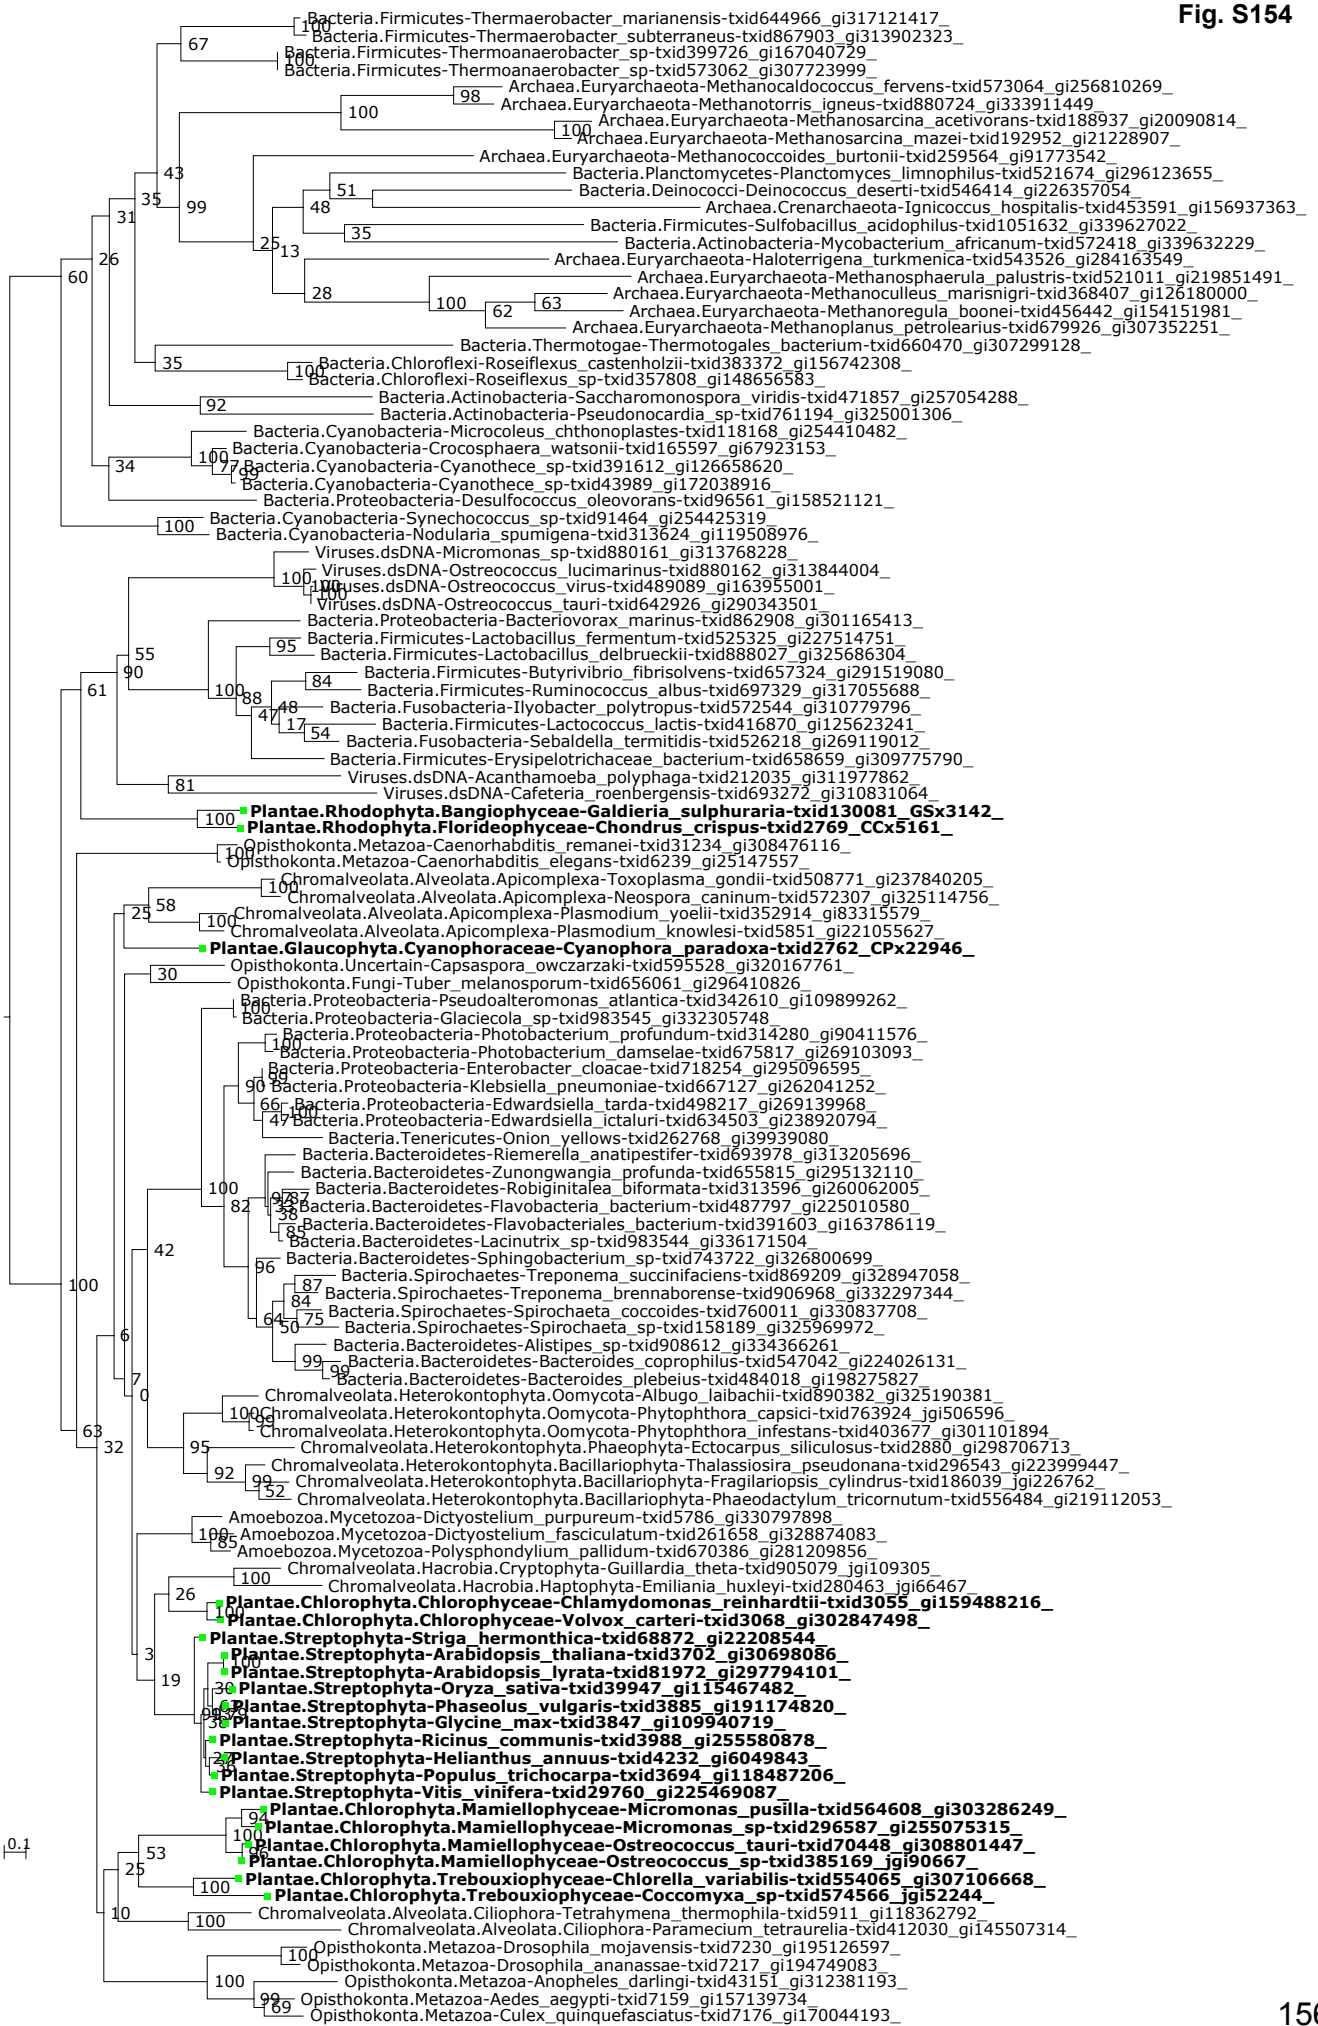

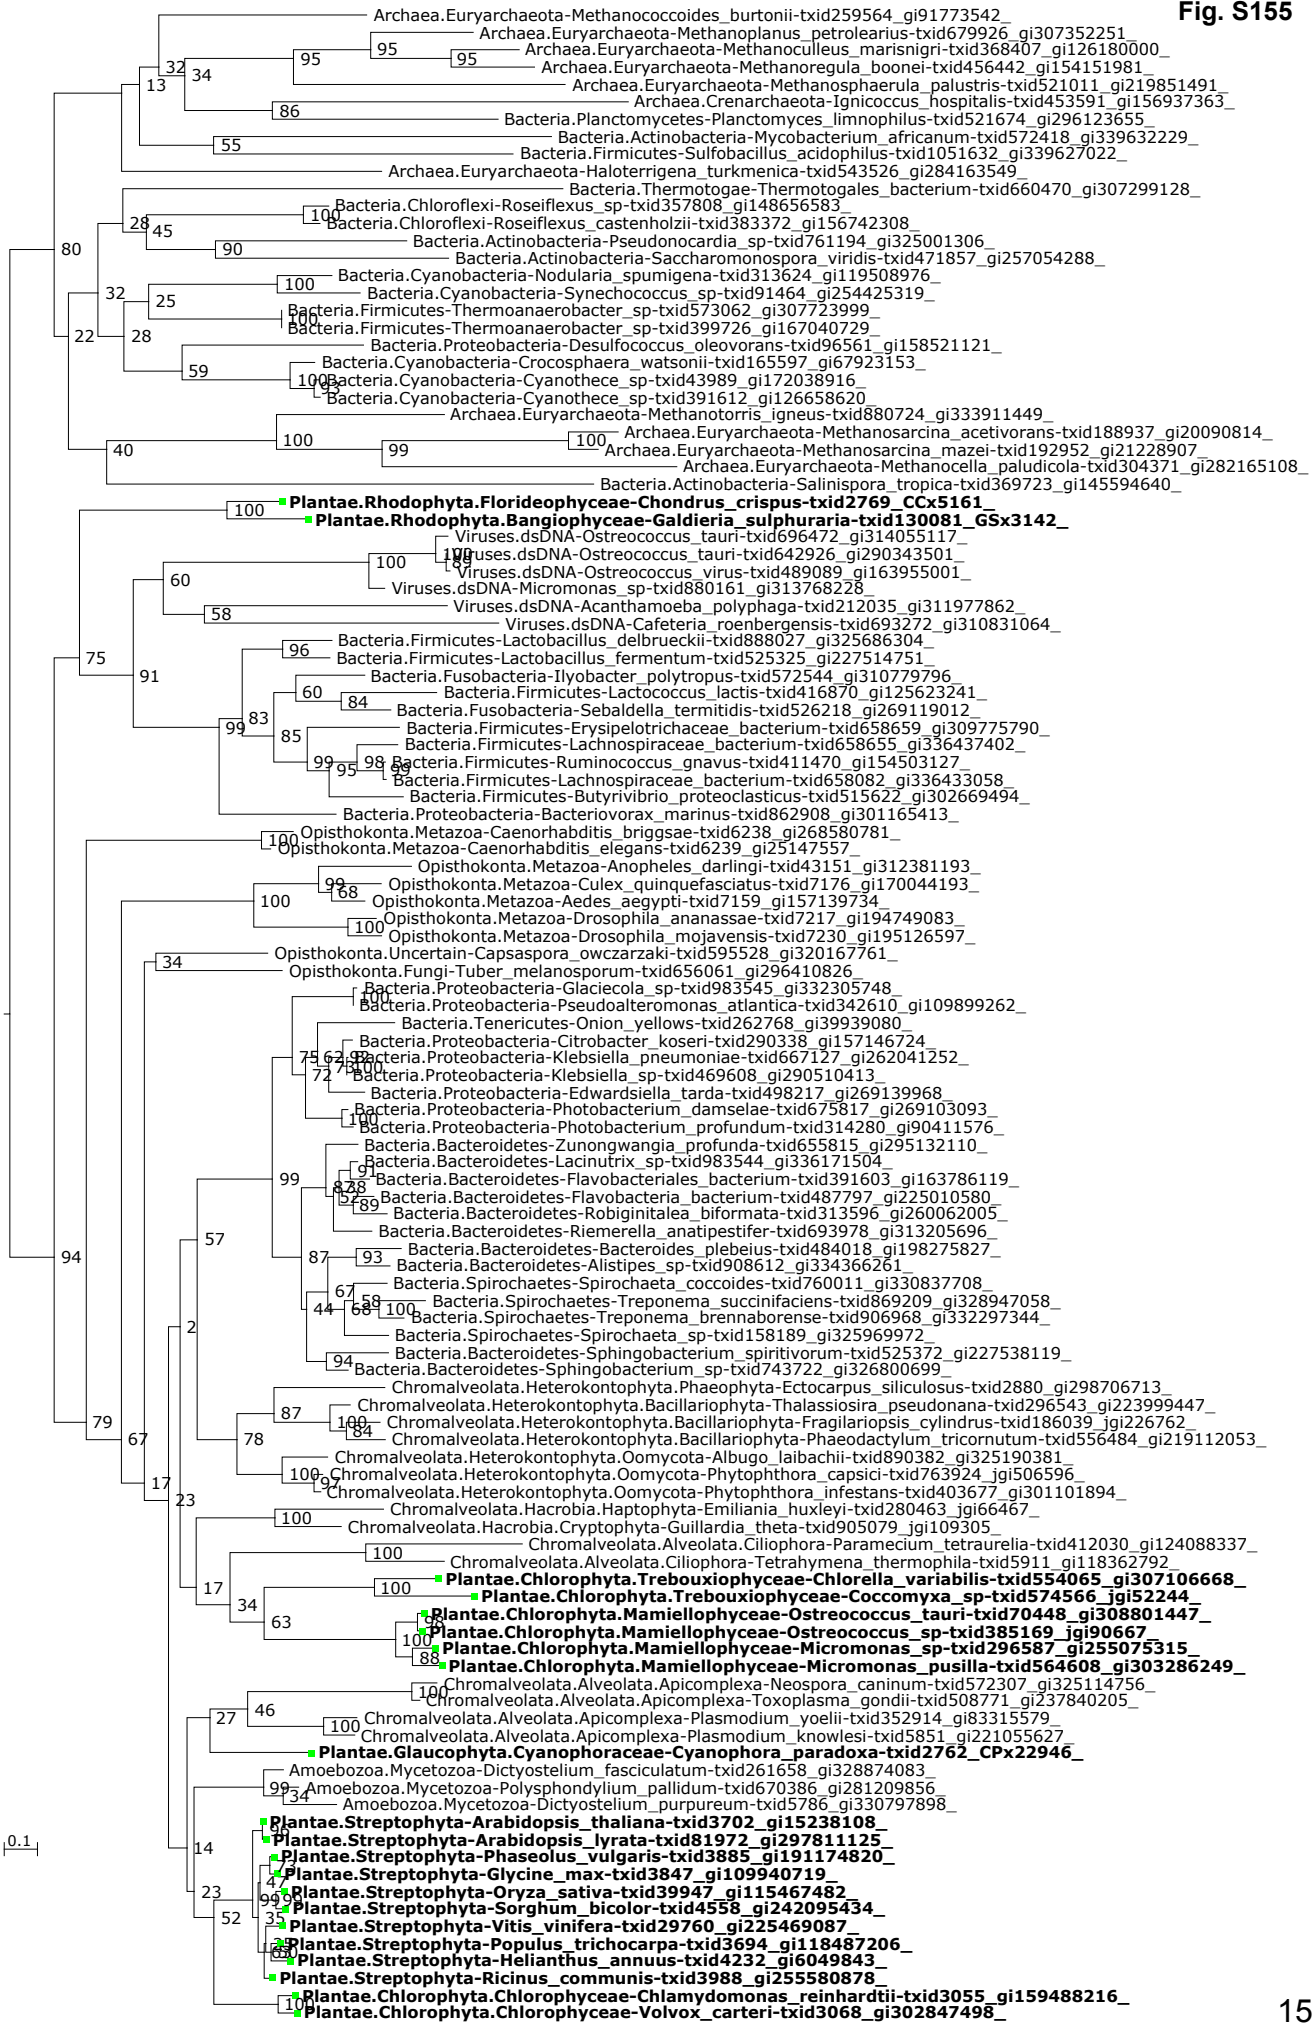

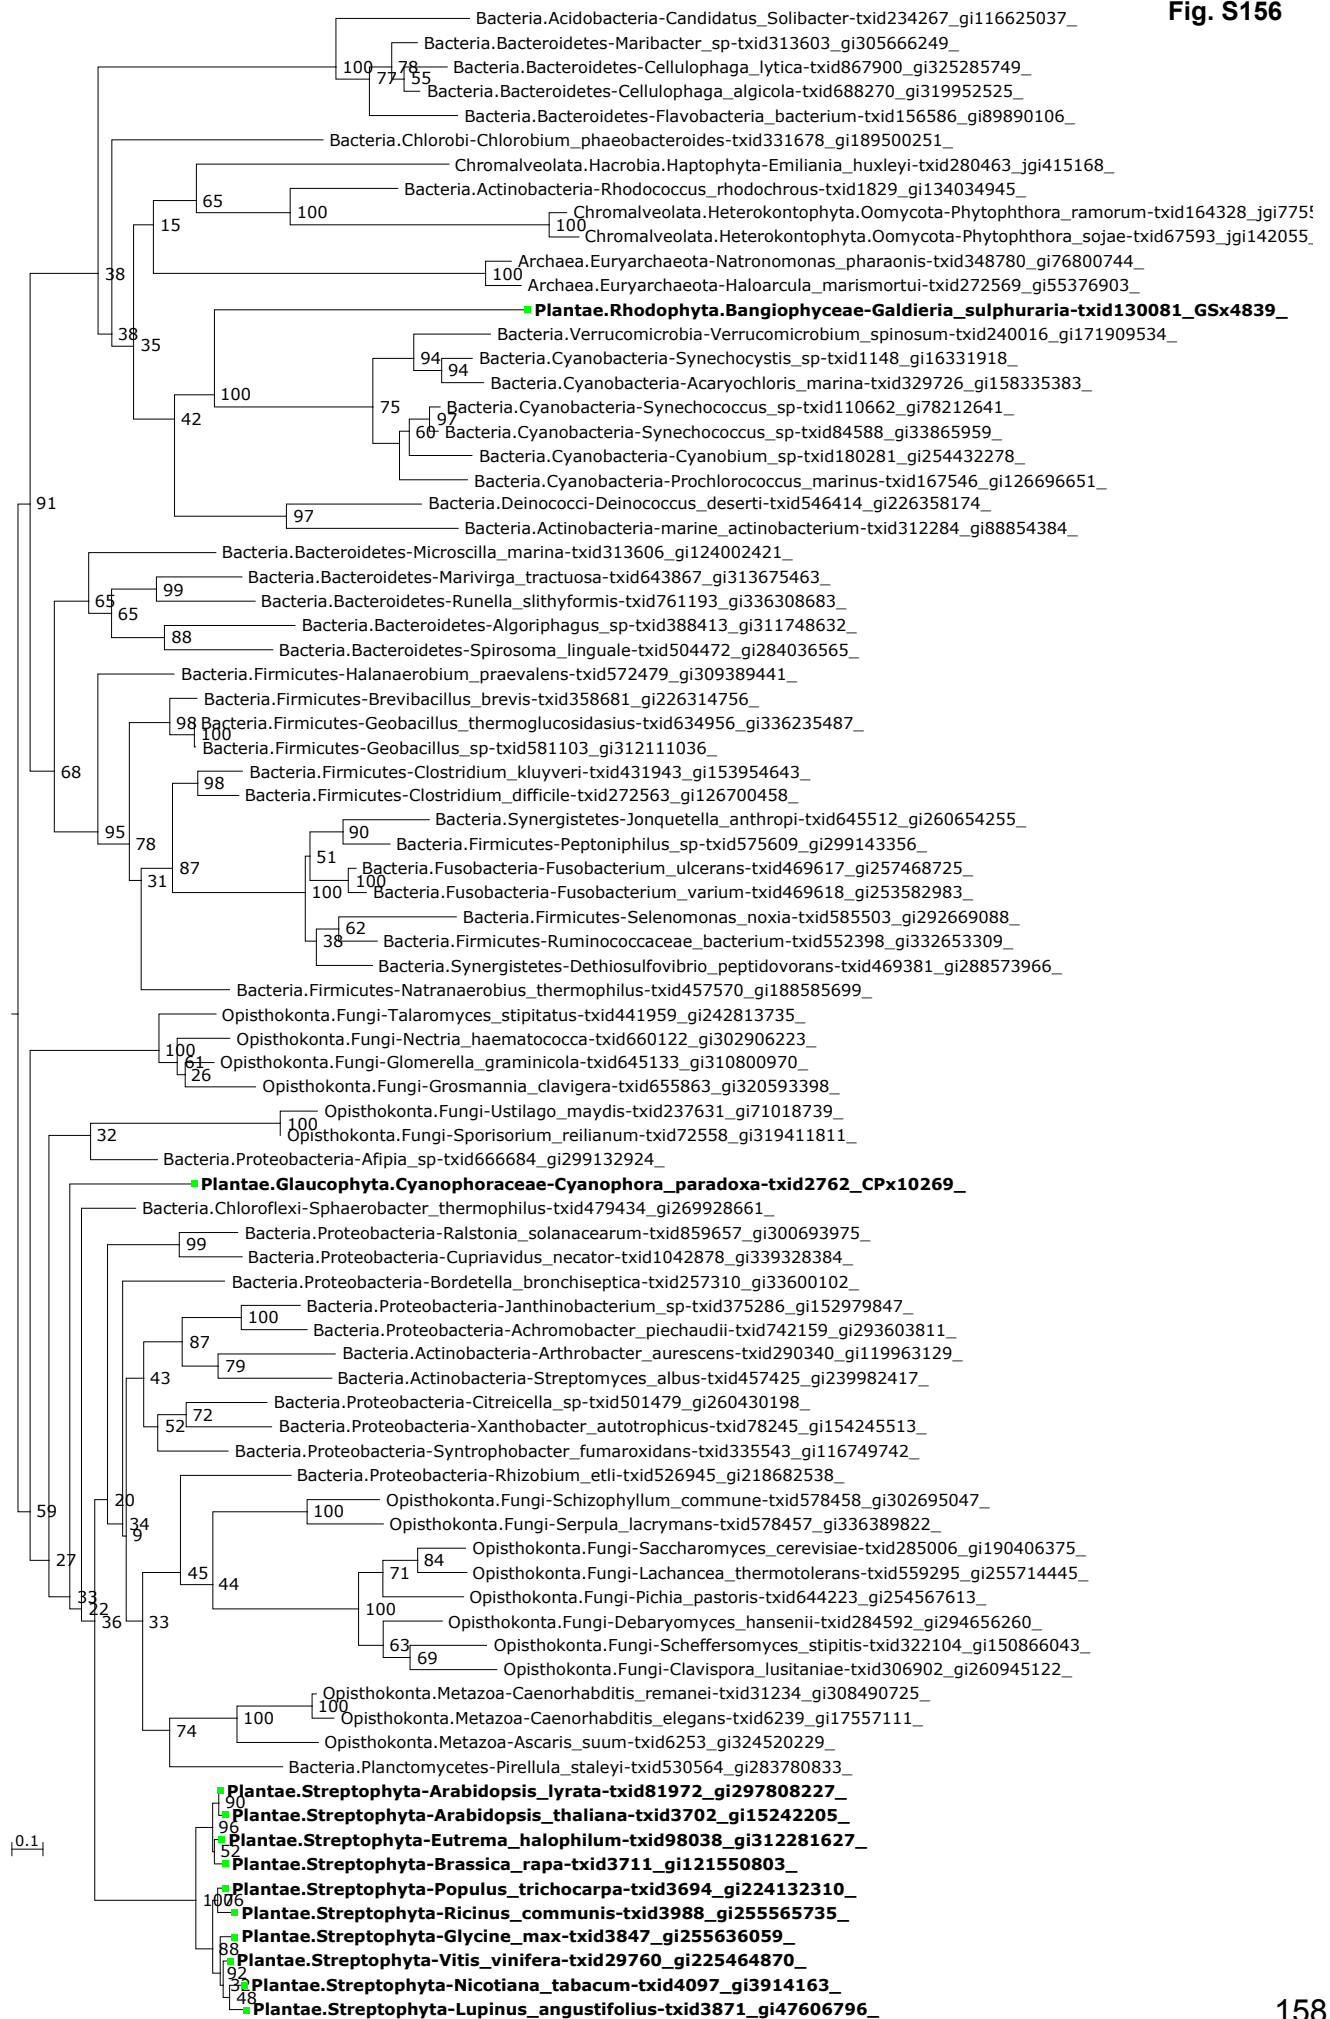

**Supplemental Table S1. *Arabidopsis thaliana* proteins involved in amino acid biosynthesis**

| Pathway                   | Figure  | Enzyme/Protein Name                                       | EC N        | Pt loc | Ref    | PI Bra | CB ORI | CB HOM |
|---------------------------|---------|-----------------------------------------------------------|-------------|--------|--------|--------|--------|--------|
| <b>Membrane transport</b> |         | <i>Arabidopsis</i> gene number                            |             |        |        |        |        |        |
|                           |         | <b>Nitrite transporter</b>                                |             |        |        |        |        |        |
|                           | S1      | At1g68570.1                                               |             | ○      | (1)    |        |        |        |
| <b>Nitrite reduction</b>  |         |                                                           |             |        |        |        |        |        |
|                           |         | <b>Nitrite reductase</b>                                  |             |        |        |        |        |        |
|                           | S2      | At2g15620.1                                               | EC 1.6.6.1  | ○      | (2)    | ○      | ○      | ○      |
| <b>Glutamine</b>          |         |                                                           |             |        |        |        |        |        |
|                           |         | <b>Glutamine synthetase</b>                               |             |        |        |        |        |        |
|                           | S3      | At5g35630.1                                               | EC 6.3.1.2  | ○      | (3, 4) | ○      |        |        |
|                           | S4      | At5g37600.1                                               |             |        | (5)    | ○      |        |        |
|                           | S5      | At1g66200.2                                               |             |        | (5)    | ○      |        |        |
|                           | S6      | AT3G17820.1                                               |             |        | (5)    | ○      |        |        |
|                           | S7      | At5g16570.1                                               |             |        | (5)    | ○      |        |        |
|                           | S8      | At1g48470.1                                               |             |        | (5)    | ○      |        |        |
| <b>Glutamate</b>          |         |                                                           |             |        |        |        |        |        |
|                           |         | <b>Glutamate synthase Ferredoxin-dependent (Fd-GOGAT)</b> |             |        |        |        |        |        |
|                           | S9      | At5g04140.2                                               | EC 1.4.7.1  | ○      | (6, 7) | ○      | ○      | ○      |
|                           | S10     | At2g41220.1                                               |             | ○      | (6, 7) | ○      | ○      | ○      |
|                           |         | <b>Glutamate synthase NADH-dependent (GOGAT)</b>          |             |        |        |        |        |        |
|                           | S11     | At5g53460.1                                               | EC 1.4.1.14 | ○      | (6, 7) |        |        | ○      |
| <b>Tryptophan</b>         |         |                                                           |             |        |        |        |        |        |
|                           |         | <b>Anthranilate synthase alpha subunit</b>                |             |        |        |        |        |        |
|                           | Fig. 3A | At5g05730.1                                               | EC 4.1.3.27 | ○      | (8)    | ○      |        | ○      |
|                           | S12     | At2g29690.1                                               |             | ○      | (8)    | ○      |        | ○      |
|                           | S13     | At3g55870.1                                               |             |        |        | ○      |        | ○      |
|                           |         | <b>Anthranilate synthase beta subunit</b>                 |             |        |        |        |        |        |

|                |                                                |             |   |          |   |   |   |
|----------------|------------------------------------------------|-------------|---|----------|---|---|---|
| <b>Fig. 3B</b> | At1g25220.1                                    |             | ○ | (9)      | ○ | ○ | ○ |
| S14            | At1g24807.1                                    |             | ○ | (10)     | ○ | ○ | ○ |
| S15            | At1g25155.1                                    |             |   |          | ○ | ○ | ○ |
| S16            | At5g57890.1                                    |             |   |          | ○ | ○ | ○ |
| S17            | At1g24909.1                                    |             |   |          | ○ | ○ | ○ |
| S18            | At1g25083.1                                    |             |   |          | ○ | ○ | ○ |
|                | <b>Anthranilate phosphoribosyl transferase</b> | EC 2.4.2.18 |   |          |   |   |   |
| S25            | At5g17990.1                                    |             | ○ | (8)      | ○ |   |   |
|                | <b>Phosphoribosyl anthranilate isomerase</b>   | EC 5.3.1.24 |   |          |   |   |   |
| S26            | At5g05590.2                                    |             | ○ | (8)      | ○ |   | ○ |
| S27            | At1g29410.1                                    |             | ○ | (8)      | ○ |   |   |
| S28            | At1g07780.3                                    |             | ○ | (8)      | ○ |   |   |
|                | <b>Indole-3-glycerol-phosphate synthase</b>    | EC 4.1.1.48 |   |          |   |   |   |
| S19            | At2g04400.1                                    |             | ○ | (10, 11) |   | ○ | ○ |
| S20            | At5g48220.1                                    |             | ○ | (10-12)  |   | ○ | ○ |
|                | <b>Tryptophan synthase alpha subunit</b>       | EC 4.2.1.20 |   |          |   |   |   |
| S21            | At3g54640.1                                    |             | ○ | (8)      | ○ | ○ | ○ |
| S22            | At4g02610.1                                    |             | ○ | (8)      | ○ | ○ | ○ |
|                | <b>Tryptophan synthase beta subunit</b>        |             |   |          |   |   |   |
| S23            | At5g54810.1                                    |             | ○ | (8)      | ○ | ○ | ○ |
| S24            | At4g27070.1                                    |             | ○ | (8)      | ○ | ○ | ○ |

---

**Phenylalanine and Tyrosine**

---

|     |                                                        |             |   |          |   |  |  |
|-----|--------------------------------------------------------|-------------|---|----------|---|--|--|
|     | <b>Chorismate mutase</b>                               | EC 5.4.99.5 |   |          |   |  |  |
| S29 | At1g69370.1                                            |             | ○ | (13, 14) |   |  |  |
| S30 | At3g29200.1                                            |             |   | (13, 14) |   |  |  |
| S31 | At5g10870.1                                            |             |   | (14)     |   |  |  |
|     | <b>Glutamate/aspartate-prephenate aminotransferase</b> | EC 2.6.1.79 |   |          |   |  |  |
| S32 | At2g22250.1                                            |             | ○ | (15)     |   |  |  |
|     | <b>Arogenate dehydratase/Prephenate Dehydratase</b>    | EC 4.2.1.91 |   |          |   |  |  |
| S33 | At3g44720.1                                            |             | ○ | (16)     | ○ |  |  |
| S34 | At1g11790.2                                            |             | ○ | (16)     | ○ |  |  |



|     |                                |             |   |      |   |  |  |
|-----|--------------------------------|-------------|---|------|---|--|--|
| S35 | At3g07630.2                    |             | ○ | (16) | ○ |  |  |
| S36 | At2g27820.1                    |             | ○ | (16) | ○ |  |  |
| S37 | At5g22630.1                    |             | ○ | (16) | ○ |  |  |
| S38 | At1g08250.1                    |             | ○ | (16) | ○ |  |  |
|     | <b>Arogenate dehydrogenase</b> | EC 1.3.1.43 |   |      |   |  |  |
| S39 | At5g34930.1                    |             | ○ | (16) | ○ |  |  |
| S40 | At1g15710.1                    |             | ○ | (16) | ○ |  |  |

---

### Histidine

---

|               |                                                |             |   |              |   |   |   |
|---------------|------------------------------------------------|-------------|---|--------------|---|---|---|
|               | <b>ATP phosphoribosyltransferase</b>           | EC 2.4.2.17 |   |              |   |   |   |
| S41           | At1g58080.1                                    |             | ○ | (17, 18)     | ○ | ? | ○ |
| S42           | At1g09795.1                                    |             | ○ | (18)         | ○ | ? | ○ |
|               | <b>Phosphoribosyl ATP pyrophosphohydrolase</b> | EC 3.6.1.31 |   |              |   |   |   |
|               | <b>Phosphoribosyl-AMP cyclohydrolase</b>       | EC 3.5.4.19 |   |              |   |   |   |
| S43           | At1g31860.1                                    |             | ○ | (18, 19)     |   |   | ○ |
|               | <b>BBMII isomerase</b>                         | EC 5.3.1.16 |   |              |   |   |   |
| S44           | At2g36230.1                                    |             | ○ | (18, 20)     | ○ |   |   |
|               | <b>Imidazoleglycerol-phosphate synthase</b>    | EC 2.4.2.-  |   |              |   |   |   |
| S45           | At4g26900.1                                    |             | ○ | (10, 18, 20) |   |   |   |
|               | <b>Imidazoleglycerol-phosphate dehydratase</b> | EC 4.2.1.19 |   |              |   |   |   |
| S46           | At3g22425.1                                    |             | ○ | (18, 21)     | ○ | ○ | ○ |
| <b>Fig. 2</b> | At4g14910.1                                    |             | ○ | (18)         | ○ | ○ | ○ |
|               | <b>Histidinol-phosphate aminotransferase</b>   | EC 2.6.1.9  |   |              |   |   |   |
| S48           | At5g10330.1                                    |             | ○ | (18)         | ○ |   | ○ |
| <b>Fig. 4</b> | At1g71920.1                                    |             | ○ | (18)         | ○ |   | ○ |
|               | <b>Histidinol phosphate phosphatase</b>        | EC 3.1.3.15 |   |              |   |   |   |
| S50           | At4g39120.1                                    |             | ○ | (18)         | ○ | ? | ○ |
|               | <b>Histidinol dehydrogenase</b>                | EC 1.1.1.23 |   |              |   |   |   |
| S51           | At5g63890.1                                    |             | ○ | (18)         |   |   | ○ |

---

### Aspartate

---

|     |                                   |            |   |         |   |  |  |
|-----|-----------------------------------|------------|---|---------|---|--|--|
|     | <b>Aspartate aminotransferase</b> | EC 2.6.1.1 |   |         |   |  |  |
| S52 | At4g31990.1                       |            | ○ | (22-24) |   |  |  |
| S53 | At2g30970.1                       |            |   | (24)    |   |  |  |
| S54 | At5g11520.1                       |            |   | (24)    | ○ |  |  |

|     |             |  |  |      |   |
|-----|-------------|--|--|------|---|
| S55 | At5g19550.1 |  |  | (25) | ○ |
| S56 | At1g62800.1 |  |  |      | ○ |
| S57 | At5g51690.1 |  |  |      |   |
| S58 | At1g62960.1 |  |  |      |   |

---

**Aspartate-derived**


---

|     |                                                  |             |   |          |     |
|-----|--------------------------------------------------|-------------|---|----------|-----|
|     | <b>Aspartate kinase</b>                          | EC 2.7.2.4  |   |          |     |
| S59 | At5g13280.1                                      |             | ○ | (26, 27) | ○   |
| S60 | At5g14060.1                                      |             |   | (26, 27) | ○   |
| S61 | At3g02020.1                                      |             |   | (26, 27) | ○   |
|     | <b>Aspartate kinase/homoserine dehydrogenase</b> |             |   |          |     |
| S62 | At1g31230.1                                      |             | ○ | (26-28)  |     |
| S63 | At4g19710.1                                      |             | ○ | (26-28)  |     |
|     | <b>Aspartate semialdehyde dehydrogenase</b>      | EC 1.2.1.11 |   |          |     |
| S64 | At1g14810.1                                      |             | ○ | (29)     | ? ○ |
|     | <b>Homoserine dehydrogenase</b>                  | EC 1.1.1.3  |   |          |     |
| S65 | At5g21060.1                                      |             |   | (30)     | ○   |
|     | <b>Homoserine kinase</b>                         | EC 2.7.1.39 |   |          |     |
| S66 | At2g17265.1                                      |             | ○ | (27, 31) | ○   |

---

**Lysine**


---

|     |                                           |             |   |          |       |
|-----|-------------------------------------------|-------------|---|----------|-------|
|     | <b>Dihydrodipicolinate synthase</b>       | EC 4.2.1.52 |   |          |       |
| S67 | At3g60880.1                               |             | ○ | (32)     |       |
| S68 | At2g45440.1                               |             | ○ | (31, 32) |       |
|     | <b>Dihydrodipicolinate reductase</b>      | EC 1.3.1.26 |   |          |       |
| S69 | At5g52100.1                               |             | ○ | (33)     | ○ ○   |
| S70 | At3g59890.2                               |             | ○ | (33, 34) |       |
| S71 | At2g44040.1                               |             | ○ | (33, 34) | ○     |
|     | <b>L-diaminopimelate aminotransferase</b> | EC 2.6.1.83 |   |          |       |
| S72 | At4g33680.1                               |             | ○ | (33, 35) | ○ ○   |
|     | <b>Diaminopimelate epimerase</b>          | EC 5.1.1.7  |   |          |       |
| S73 | At3g53580.1                               |             | ○ | (33)     | ○ ○ ○ |
|     | <b>Diaminopimelate decarboxylase</b>      | EC 4.1.1.20 |   |          |       |
| S74 | At3g14390.1                               |             | ○ | (33, 34) | ○     |
| S75 | At5g11880.1                               |             | ○ | (33, 34) | ○     |

---

**Threonine**

|     |                           |             |   |          |   |   |   |
|-----|---------------------------|-------------|---|----------|---|---|---|
|     | <b>Threonine synthase</b> | EC 4.2.99.2 |   |          |   |   |   |
| S76 | At4g29840.1               |             | ○ | (27, 36) | ○ | ? | ○ |
| S77 | At1g72810.1               |             |   | -        | ○ | ? | ○ |

**Methionine**

|     |                                          |             |   |      |   |  |  |
|-----|------------------------------------------|-------------|---|------|---|--|--|
|     | from Cysteine + P-Homoserine (Aspartate) |             |   |      |   |  |  |
|     | <b>Cystathionine gamma-synthase</b>      | EC 4.2.99.9 |   |      |   |  |  |
| S78 | At3g01120.1                              |             | ○ | (37) | ○ |  |  |
|     | <b>Cystathionine beta-lyase</b>          | EC 4.4.1.8  |   |      |   |  |  |
| S79 | At3g57050.1                              |             | ○ | (37) |   |  |  |
|     | <b>Methionine synthase</b>               | EC 2.1.1.14 |   |      |   |  |  |
| S80 | At5g20980.1                              |             | ○ | (38) |   |  |  |
| S81 | At3g03780.1                              |             |   | (38) |   |  |  |
| S82 | At5g17920.1                              |             |   | (38) |   |  |  |

**Isoleucine**

|                |                                                    |             |   |          |   |   |   |
|----------------|----------------------------------------------------|-------------|---|----------|---|---|---|
|                | <b>Threonine deaminase (Threonine dehydratase)</b> | EC 4.2.1.16 |   |          |   |   |   |
| S83            | At3g10050.1                                        |             | ○ | (39, 40) |   | ? | ○ |
|                | <b>Acetolactate synthase large subunit</b>         | EC 4.1.3.18 |   |          |   |   |   |
| <b>Fig. 5A</b> | At3g48560.1                                        |             | ○ | (10, 41) | ○ |   | ○ |
|                | <b>Acetolactate synthase small subunit</b>         |             |   |          |   |   |   |
| <b>Fig. 5B</b> | At2g31810                                          |             | ○ | (10, 41) | ○ | ○ | ○ |
| S84            | At5g16290.1                                        |             |   |          |   | ○ | ○ |
|                | <b>Ketolacid Reductoisomerase</b>                  | EC 1.1.1.86 |   |          |   |   |   |
| S85            | At3g58610                                          |             | ○ | (10, 41) | ○ |   | ○ |
|                | <b>Dihydroxyacid Dehydratase</b>                   | EC 4.2.1.9  |   |          |   |   |   |
| S86            | At3g23940.1                                        |             | ○ | (10)     |   |   | ○ |
|                | <b>Branched-chain amino acid transaminases</b>     | EC 2.6.1.42 |   |          |   |   |   |
| S87            | At1g10070.1                                        |             | ○ | (41)     |   |   | ○ |
| S88            | At3g49680.1                                        |             | ○ | (10)     |   |   | ○ |
| S89            | At5g65780.1                                        |             | ○ | (10)     |   |   | ○ |
|                | <b>methionine <math>\gamma</math>-lyase</b>        | EC 4.4.1.11 |   |          |   |   |   |
| S90            | At1g64660.1                                        |             |   | (42)     |   |   |   |

**Valine**

Uses the enzymes TDH1, ALS, KARI of  
isoleucine biosynthesis

Uses Branched-chain amino acid  
transaminases of isoleucine biosynthesis

**Leucine**

Uses the enzymes TDH1, ALS, KARI of  
isoleucine biosynthesis

Uses Branched-chain amino acid  
transaminases of isoleucine biosynthesis

**Isopropylmalate synthase**

EC 4.1.3.12

|     |             |  |   |      |  |  |   |
|-----|-------------|--|---|------|--|--|---|
| S91 | At1g18500.1 |  | ○ | (43) |  |  | ○ |
|-----|-------------|--|---|------|--|--|---|

|     |             |  |   |      |  |  |   |
|-----|-------------|--|---|------|--|--|---|
| S92 | At1g74040.1 |  | ○ | (43) |  |  | ○ |
|-----|-------------|--|---|------|--|--|---|

**Isopropylmalate synthase  
(Methylthioalkylmalate synthase)**

|     |             |  |   |      |  |  |   |
|-----|-------------|--|---|------|--|--|---|
| S93 | At5g23020.1 |  | ○ | (44) |  |  | ○ |
|-----|-------------|--|---|------|--|--|---|

|     |             |  |   |          |  |  |   |
|-----|-------------|--|---|----------|--|--|---|
| S94 | At5g23010.1 |  | ○ | (10, 45) |  |  | ○ |
|-----|-------------|--|---|----------|--|--|---|

**Isopropylmalate isomerase**

EC 4.2.1.33

|     |             |  |   |          |   |  |   |
|-----|-------------|--|---|----------|---|--|---|
| S95 | At4g13430.1 |  | ○ | (46, 47) | ○ |  | ○ |
|-----|-------------|--|---|----------|---|--|---|

|     |             |  |   |          |   |  |   |
|-----|-------------|--|---|----------|---|--|---|
| S96 | At2g43090.1 |  | ○ | (46, 47) | ○ |  | ○ |
|-----|-------------|--|---|----------|---|--|---|

|     |             |  |   |          |   |  |   |
|-----|-------------|--|---|----------|---|--|---|
| S97 | At2g43100.1 |  | ○ | (46, 47) | ○ |  | ○ |
|-----|-------------|--|---|----------|---|--|---|

|     |             |  |   |          |   |  |   |
|-----|-------------|--|---|----------|---|--|---|
| S98 | At3g58990.1 |  | ○ | (46, 47) | ○ |  | ○ |
|-----|-------------|--|---|----------|---|--|---|

**Isopropylmalate dehydrogenase**

EC 1.1.1.85

|     |             |  |   |  |   |   |   |
|-----|-------------|--|---|--|---|---|---|
| S99 | At1g80555.1 |  | ○ |  | ○ | ○ | ○ |
|-----|-------------|--|---|--|---|---|---|

|      |             |  |   |          |   |   |   |
|------|-------------|--|---|----------|---|---|---|
| S100 | At5g14200.1 |  | ○ | (12, 48) | ○ | ○ | ○ |
|------|-------------|--|---|----------|---|---|---|

|      |             |  |   |          |   |   |   |
|------|-------------|--|---|----------|---|---|---|
| S101 | At1g80560.1 |  | ○ | (12, 48) | ○ | ○ | ○ |
|------|-------------|--|---|----------|---|---|---|

|      |             |  |   |          |   |   |   |
|------|-------------|--|---|----------|---|---|---|
| S102 | At1g31180.1 |  | ○ | (12, 48) | ○ | ○ | ○ |
|------|-------------|--|---|----------|---|---|---|

**Arginine***Ornithine pathway***N-Acetylglutamate synthase**

EC 2.3.1.1

|      |             |  |   |          |   |  |  |
|------|-------------|--|---|----------|---|--|--|
| S103 | At4g37670.2 |  | ○ | (49, 50) | ○ |  |  |
|------|-------------|--|---|----------|---|--|--|

|      |             |  |  |          |   |  |  |
|------|-------------|--|--|----------|---|--|--|
| S104 | At2g22910.1 |  |  | (49, 50) | ○ |  |  |
|------|-------------|--|--|----------|---|--|--|

**N-Acetylglutamate kinase**

EC 2.7.2.8

|      |             |  |   |          |   |   |   |
|------|-------------|--|---|----------|---|---|---|
| S105 | At3g57560.1 |  | ○ | (50, 51) | ○ | ○ | ○ |
|------|-------------|--|---|----------|---|---|---|

|                |                                                                                 |             |   |              |   |   |   |
|----------------|---------------------------------------------------------------------------------|-------------|---|--------------|---|---|---|
| S106           | <b>N-Acetylglutamate-5-P reductase</b><br>At2g19940.2                           | EC 1.2.1.38 | ○ | (10, 52, 53) | ○ |   | ○ |
| S107           | <b>2-Acetylornithine aminotransferase</b><br>At1g80600                          | EC 2.6.1.11 | ○ | (10, 12, 49) |   |   | ○ |
| S108           | <b>N2-Acetylornithine:glutamate acetyltransferase</b><br>At2g37500.1            | EC 2.3.1.35 | ○ | (10, 12, 49) | ○ | ○ | ○ |
| S109           | <b>N2-Acetylornithine deacetylase</b><br>At4g17830.1<br><i>Arginine pathway</i> | EC 3.5.1.16 |   | (50, 54)     |   |   |   |
| S110           | <b>Carbamoyl-P synthetase Large subunit</b><br>At1g29900.1                      | EC 6.3.5.5  | ○ | (10, 12, 49) | ○ | ○ | ○ |
| S111           | <b>Carbamoyl-P synthetase Small subunit</b><br>At3g27740.1                      |             | ○ | (10, 12, 49) |   |   | ○ |
| S112           | <b>Ornithine carbamoyltransferase</b><br>At1g75330.1                            | EC 2.1.3.3  | ○ | (10, 12, 49) | ○ |   | ○ |
| S113           | <b>Argininosuccinate synthase</b><br>At4g24830.1                                | EC 6.3.4.5  | ○ | (53, 55)     |   |   |   |
| S114           | <b>Argininosuccinate lyase</b><br>At5g10920.1                                   | EC 4.3.2.1  | ○ | (10, 12)     |   |   | ○ |
| S115           | <b>P II nitrogen sensing protein GLB I</b><br>At4g01900.1                       |             | ○ | (56)         | ○ | ○ | ○ |
| <b>Proline</b> |                                                                                 |             |   |              |   |   |   |
|                | from Glutamate                                                                  |             |   |              |   |   |   |
| S116           | <b>Pyrroline-5-carboxylate synthase</b><br>At2g39800.1                          | EC 1.2.1.41 |   | (57)         |   |   | ○ |
| S117           | At3g55610.1                                                                     |             | ○ | (57)         |   |   | ○ |
| S118           | <b>Pyrroline-5-carboxylate reductase</b><br>At5g14800.1<br>from Ornithine       | EC 1.5.1.2  |   | (58, 59)     |   |   | ○ |
| S119           | <b>Ornithine-<math>\delta</math>-aminotransferase</b><br>At5g46180.1            | EC 2.6.1.13 |   | (60, 61)     |   |   | ○ |
| <b>Serine</b>  |                                                                                 |             |   |              |   |   |   |
|                | <b>3-phosphoglycerate dehydrogenase</b>                                         | EC 1.1.1.95 |   |              |   |   |   |

|      |                                       |             |   |          |   |   |
|------|---------------------------------------|-------------|---|----------|---|---|
| S120 | At1g17745.1                           |             | ○ | (62, 63) | ○ | ○ |
| S121 | At1g72190.1                           |             |   |          |   |   |
| S122 | At1g68010.1                           |             | ○ | (10)     | ○ | ○ |
| S123 | At3g19480.1                           |             |   | (10)     | ○ | ○ |
|      | <b>Phosphoserine aminotransferase</b> | EC 2.6.1.52 |   |          |   |   |
| S124 | At4g35630.1                           |             | ○ | (63)     |   |   |
| S125 | At2g17630.1                           |             | ○ | (63)     |   |   |
|      | <b>3-phosphoserine phosphatase</b>    | EC 3.1.3.3  |   |          |   |   |
| S126 | At1g18640.1                           |             | ○ | (63)     |   |   |

---

**Glycine**

---

|               |                                                        |             |   |          |   |   |
|---------------|--------------------------------------------------------|-------------|---|----------|---|---|
|               | <i>from Serine</i>                                     |             |   |          |   |   |
|               | <b>Serine(glycine) hydroxymethyltransferase</b>        | EC 2.1.2.1  |   |          |   |   |
| S127          | At4g32520.1                                            |             | ○ | (64)     | ○ | ○ |
| S128          | At4g37930.1                                            |             |   | (65)     | ○ | ○ |
| S129          | At5g26780.3                                            |             |   |          | ○ | ○ |
| S130          | At4g13890.1                                            |             |   |          | ○ | ○ |
| S131          | At4g13930.1                                            |             |   |          | ○ | ○ |
| S132          | At1g22020.1                                            |             |   |          | ○ | ○ |
| S133          | At1g36370.1                                            |             | ○ |          | ○ | ○ |
|               | <i>from Threonine</i>                                  |             |   |          |   |   |
|               | <b>Threonine aldolase</b>                              | EC 4.1.2.5  |   |          |   |   |
| S134          | At3g04520.1                                            |             |   | (66)     |   |   |
| S135          | At1g08630.1                                            |             |   | (66)     |   |   |
|               | <i>from Glyoxylate</i>                                 |             |   |          |   |   |
|               | <b>Serine(alanine):glyoxylate aminotransferase</b>     | EC 2.6.1.45 |   |          |   |   |
| <b>Fig. 6</b> | At2g13360.2                                            |             | ○ | (53, 55) | ○ | ○ |
|               | <b>Glutamate:glyoxylate (alanine) aminotransferase</b> | EC 2.6.1.4  |   |          |   |   |
| S137          | At1g23310.1                                            |             | ○ | (55)     |   |   |
| S138          | At1g70580.1                                            |             | ○ | (55)     |   |   |

---

**Cysteine**

---

|      |                                   |             |   |          |  |   |
|------|-----------------------------------|-------------|---|----------|--|---|
|      | <b>Serine O-acetyltransferase</b> | EC 2.3.1.30 |   |          |  |   |
| S139 | At1g55920.1                       |             | ○ | (67, 68) |  | ○ |

|      |                                                     |             |          |   |   |   |
|------|-----------------------------------------------------|-------------|----------|---|---|---|
| S140 | At2g17640.1                                         |             | (67, 69) | ○ |   | ○ |
| S141 | At3g13110.1                                         |             | (67, 68) |   |   | ○ |
| S142 | At4g35640.1                                         |             | (67, 69) | ○ |   | ○ |
| S143 | At5g56760.1                                         |             | (67, 68) | ○ |   | ○ |
|      | <b>Cysteine synthase/O-acetylserine thiol lyase</b> | EC 4.2.99.8 |          |   |   |   |
| S144 | At2g43750.1                                         |             | (70)     | ○ |   | ○ |
| S145 | At3g59760.1                                         |             | (70)     | ○ | ? | ○ |
| S146 | At4g14880.1                                         |             | (71)     | ○ | ? | ○ |

---

### Alanine

---

|      |                                              |            |          |   |   |   |
|------|----------------------------------------------|------------|----------|---|---|---|
|      | From cysteine                                |            |          |   |   |   |
|      | <b>Cysteine desulfurase</b>                  | EC 2.8.1.7 |          |   |   |   |
| S147 | At1g08490.1                                  |            | (72, 73) | ○ | ○ | ○ |
| S148 | At5g65720.1                                  |            | (74)     |   |   | ○ |
|      | <b>Alanine aminotransferase</b>              | EC 2.6.1.2 |          |   |   |   |
| S149 | At1g72330.1                                  |            | (75)     |   |   |   |
| S150 | At1g17290.1                                  |            | (75, 76) |   |   |   |
|      | <b>Alanine (tryptophan) aminotransferase</b> |            |          |   |   |   |
| S151 | At1g70560.1                                  |            | (77)     |   |   |   |
| S152 | At1g23320.1                                  |            | (77)     |   |   |   |

---

### Asparagine

---

|      |                                                    |            |      |  |  |   |
|------|----------------------------------------------------|------------|------|--|--|---|
|      | From Aspartate                                     |            |      |  |  |   |
|      | <b>Asparagine synthetase (glutamine dependent)</b> | EC 6.3.5.4 |      |  |  |   |
| S153 | At3g47340.2                                        |            | (78) |  |  | ○ |
|      | <b>Asparagine synthetase</b>                       |            |      |  |  |   |
| S154 | At5g65010.1                                        |            | (78) |  |  | ○ |
| S155 | At5g10240.1                                        |            | (78) |  |  | ○ |
|      | cyanide detoxification                             |            |      |  |  |   |
|      | <b>β-cyano-L-alanine hydratase/nitrilase</b>       | EC 3.5.5.4 |      |  |  |   |
| S156 | At5g22300.1                                        |            | (79) |  |  | ○ |

---

**EC N:** Enzyme commission numbers

**Pt loc:** Plastid localized enzymes (see Methods)

**Ref:** Reference to experimental data regarding sub-cellular localization of the corresponding protein

**PI Bra:** At least two members of the three different lineages of the Plantae supergroup (sensu Cavalier-Smith, 2981) branch in the same clade.

**CB ORI:** the query protein is of putative cyanobacterial origin

**CB HOM:** cyanobacterial homologous sequences are present in the ML tree when a non-cyanobacterial origin is presumed in the Plantae homolog



## References

1. Sugiura, M., Georgescu, M.N. & Takahashi, M. A nitrite transporter associated with nitrite uptake by higher plant chloroplasts. *Plant Cell Physiol* **48**, 1022-1035 (2007).
2. Takahashi, M., Sasaki, Y., Ida, S. & Morikawa, H. Nitrite reductase gene enrichment improves assimilation of NO(2) in Arabidopsis. *Plant Physiol* **126**, 731-741 (2001).
3. O'Neal, D. & Joy, K.W. Localisation of glutamine synthetase in chloroplasts. *Nat New Biol* **246**, 61-62 (1973).
4. Tingey, S.V., Tsai, F.Y., Edwards, J.W., Walker, E.L. & Coruzzi, G.M. Chloroplast and cytosolic glutamine synthetase are encoded by homologous nuclear genes which are differentially expressed in vivo. *J Biol Chem* **263**, 9651-9657 (1988).
5. Bernard, S.M. & Habash, D.Z. The importance of cytosolic glutamine synthetase in nitrogen assimilation and recycling. *New Phytol* **182**, 608-620 (2009).
6. Botella, J.R., Verbelen, J.P. & Valpuesta, V. Immunocytolocalization of Ferredoxin-GOGAT in the Cells of Green Leaves and Cotyledons of *Lycopersicon esculentum*. *Plant Physiol* **87**, 255-257 (1988).
7. Suzuki, A. & Knaff, D.B. Glutamate synthase: structural, mechanistic and regulatory properties, and role in the amino acid metabolism. *Photosynth Res* **83**, 191-217 (2005).
8. Zhao, J. & Last, R.L. Immunological characterization and chloroplast localization of the tryptophan biosynthetic enzymes of the flowering plant *Arabidopsis thaliana*. *J Biol Chem* **270**, 6081-6087 (1995).
9. Niyogi, K.K., Last, R.L., Fink, G.R. & Keith, B. Suppressors of trp1 fluorescence identify a new arabidopsis gene, TRP4, encoding the anthranilate synthase beta subunit. *Plant Cell* **5**, 1011-1027 (1993).
10. Zybailov, B. *et al.* Sorting signals, N-terminal modifications and abundance of the chloroplast proteome. *PLoS One* **3**, e1994 (2008).
11. Li, J., Chen, S., Zhu, L. & Last, R.L. Isolation of cDNAs encoding the tryptophan pathway enzyme indole-3-glycerol phosphate synthase from *Arabidopsis thaliana*. *Plant Physiol* **108**, 877-878 (1995).
12. Peltier, J.B. *et al.* The oligomeric stromal proteome of *Arabidopsis thaliana* chloroplasts. *Mol Cell Proteomics* **5**, 114-133 (2006).
13. Eberhard, J. *et al.* Cytosolic and plastidic chorismate mutase isozymes from *Arabidopsis thaliana*: molecular characterization and enzymatic properties. *Plant J* **10**, 815-821 (1996).
14. Mobley, E.M., Kunkel, B.N. & Keith, B. Identification, characterization and comparative analysis of a novel chorismate mutase gene in *Arabidopsis thaliana*. *Gene* **240**, 115-123 (1999).
15. Graindorge, M. *et al.* Identification of a plant gene encoding glutamate/aspartate-prephenate aminotransferase: the last homeless enzyme of aromatic amino acids biosynthesis. *FEBS Lett* **584**, 4357-4360 (2010).
16. Rippert, P., Puyaubert, J., Grisolle, D., Derrier, L. & Matringe, M. Tyrosine and phenylalanine are synthesized within the plastids in *Arabidopsis*. *Plant Physiol* **149**, 1251-1260 (2009).
17. Ohta, D. *et al.* Molecular cloning and characterization of ATP-phosphoribosyl transferase from *Arabidopsis*, a key enzyme in the histidine biosynthetic pathway. *Plant Physiol* **122**, 907-914 (2000).
18. Stepansky, A. & Leustek, T. Histidine biosynthesis in plants. *Amino Acids* **30**, 127-142 (2006).
19. Fujimori, K. & Ohta, D. Isolation and characterization of a histidine biosynthetic gene in *Arabidopsis* encoding a polypeptide with two separate domains for phosphoribosyl-ATP pyrophosphohydrolase and phosphoribosyl-AMP cyclohydrolase. *Plant Physiol* **118**, 275-283 (1998).
20. Muralla, R., Sweeney, C., Stepansky, A., Leustek, T. & Meinke, D. Genetic dissection of histidine biosynthesis in *Arabidopsis*. *Plant Physiol* **144**, 890-903 (2007).
21. Tada, S. *et al.* Insect cell expression of recombinant imidazoleglycerolphosphate dehydratase of *Arabidopsis* and wheat and inhibition by triazole herbicides. *Plant Physiol* **109**, 153-159 (1995).
22. Kwok, E.Y. & Hanson, M.R. GFP-labelled Rubisco and aspartate aminotransferase are present in plastid stromules and traffic between plastids. *J Exp Bot* **55**, 595-604 (2004).
23. Wilkie, S.E., Lambert, R. & Warren, M.J. Chloroplastic aspartate aminotransferase from *Arabidopsis thaliana*: an examination of the relationship between the structure of the gene and the spatial structure of the protein. *Biochem J* **319** ( Pt 3, 969-976 (1996).

24. Wilkie, S.E. & Warren, M.J. Recombinant expression, purification, and characterization of three isoenzymes of aspartate aminotransferase from *Arabidopsis thaliana*. *Protein Expr Purif* **12**, 381-389 (1998).
25. Schultz, C.J., Hsu, M., Miesak, B. & Coruzzi, G.M. *Arabidopsis* mutants define an in vivo role for isoenzymes of aspartate aminotransferase in plant nitrogen assimilation. *Genetics* **149**, 491-499 (1998).
26. Curien, G., Laurencin, M., Robert-Genthon, M. & Dumas, R. Allosteric monofunctional aspartate kinases from *Arabidopsis*. *FEBS J* **274**, 164-176 (2007).
27. Wallsgrave, R.M., Lea, P.J. & Mifflin, B.J. Intracellular localization of aspartate kinase and the enzymes of threonine and methionine biosynthesis in green leaves. *Plant Physiol* **71**, 780-784 (1983).
28. Ghislain, M., Frankard, V., Vandenbossche, D., Matthews, B.F. & Jacobs, M. Molecular analysis of the aspartate kinase-homoserine dehydrogenase gene from *Arabidopsis thaliana*. *Plant Mol Biol* **24**, 835-851 (1994).
29. Paris, S., Wessel, P.M. & Dumas, R. Overproduction, purification, and characterization of recombinant aspartate semialdehyde dehydrogenase from *Arabidopsis thaliana*. *Protein Expr Purif* **24**, 99-104 (2002).
30. Schroeder, A.C. *et al.* Threonine-insensitive homoserine dehydrogenase from soybean: genomic organization, kinetic mechanism, and in vivo activity. *J Biol Chem* **285**, 827-834 (2010).
31. Sarrobert, C. *et al.* Identification of an *Arabidopsis thaliana* mutant accumulating threonine resulting from mutation in a new dihydrodipicolinate synthase gene. *Plant J* **24**, 357-367 (2000).
32. Vauterin, M. & Jacobs, M. Isolation of a poplar and an *Arabidopsis thaliana* dihydrodipicolinate synthase cDNA clone. *Plant Mol Biol* **25**, 545-550 (1994).
33. Hudson, A.O. *et al.* Biosynthesis of lysine in plants: evidence for a variant of the known bacterial pathways. *Biochim Biophys Acta* **1721**, 27-36 (2005).
34. Azevedo, R.A., Arruda, P., Turner, W.L. & Lea, P.J. The biosynthesis and metabolism of the aspartate derived amino acids in higher plants. *Phytochemistry* **46**, 395-419 (1997).
35. Hudson, A.O., Singh, B.K., Leustek, T. & Gilvarg, C. An LL-diaminopimelate aminotransferase defines a novel variant of the lysine biosynthesis pathway in plants. *Plant Physiol* **140**, 292-301 (2006).
36. Laber, B. *et al.* Characterization of recombinant *Arabidopsis thaliana* threonine synthase. *Eur J Biochem* **263**, 212-221 (1999).
37. Ravanel, S., Gakiere, B., Job, D. & Douce, R. The specific features of methionine biosynthesis and metabolism in plants. *Proc Natl Acad Sci U S A* **95**, 7805-7812 (1998).
38. Ravanel, S. *et al.* Methionine metabolism in plants: chloroplasts are autonomous for de novo methionine synthesis and can import S-adenosylmethionine from the cytosol. *J Biol Chem* **279**, 22548-22557 (2004).
39. Mifflin, B.J. The location of nitrite reductase and other enzymes related to amino Acid biosynthesis in the plastids of root and leaves. *Plant Physiol* **54**, 550-555 (1974).
40. Schulze-Siebert, D., Heineke, D., Scharf, H. & Schultz, G. Pyruvate-Derived Amino Acids in Spinach Chloroplasts : Synthesis and Regulation during Photosynthetic Carbon Metabolism. *Plant Physiol* **76**, 465-471 (1984).
41. Binder, S. Branched-Chain Amino Acid Metabolism in *Arabidopsis thaliana*. *The Arabidopsis Book* **null**, 1-14 (2008).
42. Joshi, V. & Jander, G. *Arabidopsis* methionine gamma-lyase is regulated according to isoleucine biosynthesis needs but plays a subordinate role to threonine deaminase. *Plant physiology* **151**, 367-78 (2009).
43. de Kraker, J.W., Luck, K., Textor, S., Tokuhisa, J.G. & Gershenzon, J. Two *Arabidopsis* genes (IPMS1 and IPMS2) encode isopropylmalate synthase, the branchpoint step in the biosynthesis of leucine. *Plant Physiol* **143**, 970-986 (2007).
44. Textor, S., de Kraker, J.W., Hause, B., Gershenzon, J. & Tokuhisa, J.G. MAM3 catalyzes the formation of all aliphatic glucosinolate chain lengths in *Arabidopsis*. *Plant Physiol* **144**, 60-71 (2007).
45. Field, B. *et al.* Glucosinolate and amino acid biosynthesis in *Arabidopsis*. *Plant Physiol* **135**, 828-839 (2004).
46. Knill, T., Reichelt, M., Paetz, C., Gershenzon, J. & Binder, S. *Arabidopsis thaliana* encodes a bacterial-type heterodimeric isopropylmalate isomerase involved in both Leu biosynthesis and the Met chain elongation pathway of glucosinolate formation. *Plant Mol Biol* **71**, 227-239 (2009).
47. He, Y., Chen, B., Pang, Q., Strul, J.M. & Chen, S. Functional specification of *Arabidopsis* isopropylmalate isomerases in glucosinolate and leucine biosynthesis. *Plant Cell Physiol* **51**, 1480-1487 (2010).

48. Nozawa, A., Takano, J., Miwa, K., Nakagawa, Y. & Fujiwara, T. Cloning of cDNAs encoding isopropylmalate dehydrogenase from *Arabidopsis thaliana* and accumulation patterns of their transcripts. *Biosci Biotechnol Biochem* **69**, 806-810 (2005).
49. Jain, J.C., Shargool, P.D. & Chung, S. Compartmentation studies on enzymes of ornithine biosynthesis in plant cells. *Plant Science* **51**, 17-20 (1987).
50. Slocum, R.D. Genes, enzymes and regulation of arginine biosynthesis in plants. *Plant Physiol Biochem* **43**, 729-745 (2005).
51. Sugiyama, K., Hayakawa, T., Kudo, T., Ito, T. & Yamaya, T. Interaction of N-acetylglutamate kinase with a PII-like protein in rice. *Plant Cell Physiol* **45**, 1768-1778 (2004).
52. Mitra, S.K., Gantt, J.A., Ruby, J.F., Clouse, S.D. & Goshe, M.B. Membrane proteomic analysis of *Arabidopsis thaliana* using alternative solubilization techniques. *J Proteome Res* **6**, 1933-1950 (2007).
53. Rutschow, H., Ytterberg, A.J., Friso, G., Nilsson, R. & van Wijk, K.J. Quantitative proteomics of a chloroplast SRP54 sorting mutant and its genetic interactions with CLPC1 in *Arabidopsis*. *Plant Physiol* **148**, 156-175 (2008).
54. Yokota, A. *et al.* Citrulline and DRIP-1 protein (ArgE homologue) in drought tolerance of wild watermelon. *Ann Bot* **89 Spec No.**, 825-832 (2002).
55. Kleffmann, T. *et al.* The *Arabidopsis thaliana* chloroplast proteome reveals pathway abundance and novel protein functions. *Curr Biol* **14**, 354-362 (2004).
56. Hsieh, M.H., Lam, H.M., van de Loo, F.J. & Coruzzi, G. A PII-like protein in *Arabidopsis*: putative role in nitrogen sensing. *Proceedings of the National Academy of Sciences of the United States of America* **95**, 13965-70 (1998).
57. Szekely, G. *et al.* Duplicated P5CS genes of *Arabidopsis* play distinct roles in stress regulation and developmental control of proline biosynthesis. *Plant J* **53**, 11-28 (2008).
58. Rayapati, P.J., Stewart, C.R. & Hack, E. Pyrroline-5-Carboxylate Reductase Is in Pea (*Pisum sativum* L.) Leaf Chloroplasts. *Plant Physiol* **91**, 581-586 (1989).
59. Szoke, A., Miao, G.H., Hong, Z. & Verma, D.P. Subcellular location of delta-pyrroline-5-carboxylate reductase in root/nodule and leaf of soybean. *Plant Physiol* **99**, 1642-1649 (1992).
60. Funck, D., Stadelhofer, B. & Koch, W. Ornithine-delta-aminotransferase is essential for arginine catabolism but not for proline biosynthesis. *BMC Plant Biol* **8**, 40 (2008).
61. Roosens, N.H., Thu, T.T., Iskandar, H.M. & Jacobs, M. Isolation of the ornithine-delta-aminotransferase cDNA and effect of salt stress on its expression in *Arabidopsis thaliana*. *Plant Physiol* **117**, 263-271 (1998).
62. Ho, C.L., Noji, M. & Saito, K. Plastidic pathway of serine biosynthesis. Molecular cloning and expression of 3-phosphoserine phosphatase from *Arabidopsis thaliana*. *J Biol Chem* **274**, 11007-11012 (1999).
63. Ho, C.L. & Saito, K. Molecular biology of the plastidic phosphorylated serine biosynthetic pathway in *Arabidopsis thaliana*. *Amino Acids* **20**, 243-259 (2001).
64. Zhang, Y., Sun, K., Sandoval, F.J., Santiago, K. & Roje, S. One-carbon metabolism in plants: characterization of a plastid serine hydroxymethyltransferase. *Biochem J* **430**, 97-105 (2010).
65. Jamai, A., Salome, P.A., Schilling, S.H., Weber, A.P. & McClung, C.R. *Arabidopsis* photorespiratory serine hydroxymethyltransferase activity requires the mitochondrial accumulation of ferredoxin-dependent glutamate synthase. *Plant Cell* **21**, 595-606 (2009).
66. Joshi, V., Laubengayer, K.M., Schauer, N., Fernie, A.R. & Jander, G. Two *Arabidopsis* threonine aldolases are nonredundant and compete with threonine deaminase for a common substrate pool. *The Plant cell* **18**, 3564-75 (2006).
67. Howarth, J.R. *et al.* The serine acetyltransferase gene family in *Arabidopsis thaliana* and the regulation of its expression by cadmium. *Plant Mol Biol* **51**, 589-598 (2003).
68. Noji, M., Inoue, K., Kimura, N., Gouda, A. & Saito, K. Isoform-dependent differences in feedback regulation and subcellular localization of serine acetyltransferase involved in cysteine biosynthesis from *Arabidopsis thaliana*. *J Biol Chem* **273**, 32739-32745 (1998).
69. Kawashima, C.G., Berkowitz, O., Hell, R., Noji, M. & Saito, K. Characterization and expression analysis of a serine acetyltransferase gene family involved in a key step of the sulfur assimilation pathway in *Arabidopsis*. *Plant Physiol* **137**, 220-230 (2005).
70. Hesse, H., Lipke, J., Altmann, T. & Hofgen, R. Molecular cloning and expression analyses of mitochondrial and plastidic isoforms of cysteine synthase (O-acetylserine(thiol)lyase) from *Arabidopsis thaliana*. *Amino Acids* **16**, 113-131 (1999).
71. Barroso, C., Vega, J.M. & Gotor, C. A new member of the cytosolic O-acetylserine(thiol)lyase gene family in *Arabidopsis thaliana*. *FEBS Lett* **363**, 1-5 (1995).

72. Leon, S., Touraine, B., Briat, J.F. & Lobreaux, S. The AtNFS2 gene from *Arabidopsis thaliana* encodes a NifS-like plastidial cysteine desulphurase. *Biochem J* **366**, 557-564 (2002).
73. Van Hoewyk, D. *et al.* Chloroplast iron-sulfur cluster protein maturation requires the essential cysteine desulfurase CpNifS. *Proc Natl Acad Sci U S A* **104**, 5686-5691 (2007).
74. Frazzon, A.P. *et al.* Functional analysis of *Arabidopsis* genes involved in mitochondrial iron-sulfur cluster assembly. *Plant Mol Biol* **64**, 225-240 (2007).
75. Liepman, A.H. & Olsen, L.J. Alanine aminotransferase homologs catalyze the glutamate:glyoxylate aminotransferase reaction in peroxisomes of *Arabidopsis*. *Plant Physiol* **131**, 215-227 (2003).
76. Igarashi, D. *et al.* Identification of photorespiratory glutamate:glyoxylate aminotransferase (GGAT) gene in *Arabidopsis*. *Plant J* **33**, 975-987 (2003).
77. Stepanova, A.N. *et al.* TAA1-mediated auxin biosynthesis is essential for hormone crosstalk and plant development. *Cell* **133**, 177-191 (2008).
78. Lam, H.M., Hsieh, M.H. & Coruzzi, G. Reciprocal regulation of distinct asparagine synthetase genes by light and metabolites in *Arabidopsis thaliana*. *Plant J* **16**, 345-353 (1998).
79. Piotrowski, M., Schonfelder, S. & Weiler, E.W. The *Arabidopsis thaliana* isogene NIT4 and its orthologs in tobacco encode beta-cyano-L-alanine hydratase/nitrilase. *J Biol Chem* **276**, 2616-2621 (2001).

**Supplemental Table S2. Protein-coding genes from Plantae plastid genomes of putative non- cyanobacterial origin**

| Taxa                 | <i>Cyanophora paradoxa</i> | <i>Arabidopsis thaliana</i> | <i>Chlamydomonas reinhardtii</i> | <i>Mesostigma viride</i> | <i>Pyropia yezoensis</i> | <i>Cyanidisochoyzon merolae</i> | <i>Cyanidium caldarium</i> |
|----------------------|----------------------------|-----------------------------|----------------------------------|--------------------------|--------------------------|---------------------------------|----------------------------|
| GenBank accession    | NC 001675                  | NC 000932                   | NC 005353                        | NC 005353                | NC 007932                | NC 004799                       | NC 001840                  |
| Protein-coding genes | 149                        | 85                          | 69                               | 105                      | 209                      | 207                             | 203                        |
| 11467418             | 126022795                  |                             | 195976152                        | 11466449                 | 90994553                 | 30468108                        | 126165876                  |
| 11467417             | 7525097                    |                             | 41179071                         | 11466448                 | 90994541                 | 30468247                        | 11465407                   |
| 11467409             | 7525092                    |                             | 41179064                         | 11466447                 | 90994535                 | 30468166                        | 11465514                   |
| 11467404             | 7525076                    |                             | 41179058                         | 11466445                 | 90994512                 | 30468102                        | 11465461                   |
| 11467394             | 7525075                    |                             | 41179042                         | 11466438                 | 90994505                 | 30468200                        | 11465496                   |
| 11467388             | 7525066                    |                             | 41179035                         | 11466434                 | 90994485                 | 30468103                        | 11465440                   |
| 11467353             | 7525056                    |                             | 41179008                         | 11466422                 | 90994472                 | 30468226                        | 11465403                   |
| 11467313             |                            |                             |                                  | 11466421                 | 90994461                 | 30468219                        | 11465578                   |
| 11467289             |                            |                             |                                  | 11466408                 | 90994424                 | 30468133                        | 11465480                   |
| 11467286             |                            |                             |                                  | 11466359                 | 90994419                 | 30468105                        | 11465409                   |
|                      |                            |                             |                                  |                          | 90994418                 | 30468104                        | 11465581                   |
|                      |                            |                             |                                  |                          | 90994417                 | 30468190                        | 11465404                   |
|                      |                            |                             |                                  |                          | 90994414                 | 30468169                        | 11465481                   |
|                      |                            |                             |                                  |                          | 90994404                 | 30468165                        | 11465586                   |
|                      |                            |                             |                                  |                          |                          | 30468147                        | 11465437                   |
|                      |                            |                             |                                  |                          |                          | 30468090                        | 11465551                   |
|                      |                            |                             |                                  |                          |                          | 30468097                        | 11465424                   |
|                      |                            |                             |                                  |                          |                          | 30468106                        | 11465410                   |
|                      |                            |                             |                                  |                          |                          | 30468123                        | 11465441                   |
|                      |                            |                             |                                  |                          |                          | 30468228                        | 11465447                   |
|                      |                            |                             |                                  |                          |                          | 30468191                        | 11465442                   |
|                      |                            |                             |                                  |                          |                          | 30468155                        | 11465506                   |
|                      |                            |                             |                                  |                          |                          | 30468187                        | 11465429                   |
|                      |                            |                             |                                  |                          |                          | 30468204                        | 11465519                   |
|                      |                            |                             |                                  |                          |                          | 30468071                        | 11465435                   |
|                      |                            |                             |                                  |                          |                          | 30468197                        | 11465448                   |
|                      |                            |                             |                                  |                          |                          | 30468180                        | 11465555                   |
|                      |                            |                             |                                  |                          |                          | 30468170                        | 11465523                   |
|                      |                            |                             |                                  |                          |                          | 30468192                        | 11465502                   |
|                      |                            |                             |                                  |                          |                          | 30468205                        | 11465503                   |
|                      |                            |                             |                                  |                          |                          | 30468202                        | 11465548                   |
|                      |                            |                             |                                  |                          |                          | 30468201                        | 11465504                   |
|                      |                            |                             |                                  |                          |                          | 30468144                        | 11465501                   |
|                      |                            |                             |                                  |                          |                          | 30468059                        | 11465505                   |
|                      |                            |                             |                                  |                          |                          | 30468156                        | 11465500                   |
|                      |                            |                             |                                  |                          |                          | 30468251                        | 11465556                   |
|                      |                            |                             |                                  |                          |                          | 30468196                        | 11465462                   |
|                      |                            |                             |                                  |                          |                          | 30468074                        | 11465495                   |
|                      |                            |                             |                                  |                          |                          | 30468110                        | 11465478                   |
|                      |                            |                             |                                  |                          |                          | 30468063                        | 11465475                   |
|                      |                            |                             |                                  |                          |                          | 30468129                        | 11465473                   |
|                      |                            |                             |                                  |                          |                          | 30468185                        | 11465470                   |
|                      |                            |                             |                                  |                          |                          | 30468049                        | 11465465                   |
|                      |                            |                             |                                  |                          |                          | 30468055                        |                            |

30468137  
30468140  
30468141  
30468060  
30468142  
30468250  
30468138  
30468066  
30468053  
30468058  
30468253  
30468139  
30468107  
30468230

---
